# Supplementary material for: SCIRT lncRNA Restrains Tumorigenesis by Opposing Transcriptional Programs of Tumor-Initiating Cells
Source: Oxford University Press journal article supplement (doi:10.1158/0008-5472.can-20-2612), 2020-11-10
Supplement: 00085472can202612-sup-248586_2_supp_6687194_qfyknn.xlsx [file 00085472can202612-sup-248586_2_supp_6687194_qfyknn.xlsx]

## Sheet: 16hSph vs Adh
Gene Symbol	Gencode	Biotype	baseMean	log2FoldChange	lfcSE	stat	pvalue	padj
CD74	ENSG00000019582.10	protein_coding	5257.72	2.98492	0.0488835	61.062	0	0
VIM	ENSG00000026025.9	protein_coding	52936	0.951908	0.0164417	57.8959	0	0
HMGB3	ENSG00000029993.10	protein_coding	4936.44	1.87958	0.0447778	41.9757	0	0
TIMP2	ENSG00000035862.8	protein_coding	10520.3	-1.21885	0.0303518	-40.1572	0	0
LTBP1	ENSG00000049323.11	protein_coding	4497.4	3.1184	0.0522448	59.6881	0	0
LAMC2	ENSG00000058085.10	protein_coding	2861.14	2.40535	0.0626764	38.3773	0	0
PLOD1	ENSG00000083444.12	protein_coding	5109.94	2.09578	0.0435222	48.1542	0	0
FKBP5	ENSG00000096060.10	protein_coding	5985.19	4.98152	0.0608002	81.9326	0	0
LGALS1	ENSG00000100097.7	protein_coding	5658.79	1.92095	0.0419773	45.7617	0	0
TIMP3	ENSG00000100234.11	protein_coding	8204.33	-2.77601	0.0392916	-70.6514	0	0
CST3	ENSG00000101439.4	protein_coding	10074.8	1.59112	0.0306537	51.9062	0	0
PGK1	ENSG00000102144.9	protein_coding	15522	1.52192	0.0251221	60.5807	0	0
TIMP1	ENSG00000102265.7	protein_coding	22071.9	3.69193	0.0254756	144.92	0	0
TSC22D1	ENSG00000102804.10	protein_coding	4993.54	1.66262	0.0434624	38.2543	0	0
NDRG1	ENSG00000104419.10	protein_coding	22442.3	2.91511	0.0231179	126.097	0	0
NAMPT	ENSG00000105835.7	protein_coding	10646.2	1.5978	0.0306116	52.1958	0	0
SERPINE1	ENSG00000106366.7	protein_coding	13184.4	3.90378	0.0336839	115.894	0	0
CPD	ENSG00000108582.7	protein_coding	15348.2	4.09947	0.0321989	127.317	0	0
GAPDH	ENSG00000111640.10	protein_coding	50903.3	1.52411	0.0154609	98.5781	0	0
VEGFA	ENSG00000112715.16	protein_coding	5659.36	1.76898	0.0414373	42.6905	0	0
LOX	ENSG00000113083.8	protein_coding	11783.1	4.28191	0.0371424	115.283	0	0
FN1	ENSG00000115414.14	protein_coding	71974.8	5.17998	0.0403542	128.363	0	0
ERRFI1	ENSG00000116285.8	protein_coding	22670	2.3119	0.0254388	90.8807	0	0
TXNIP	ENSG00000117289.7	protein_coding	4261.11	6.44431	0.10016	64.3404	0	0
DUSP1	ENSG00000120129.5	protein_coding	3203.49	2.89281	0.0634478	45.5935	0	0
CDKN1A	ENSG00000124762.9	protein_coding	2723.33	2.42652	0.0641118	37.8483	0	0
AHNAK	ENSG00000124942.9	protein_coding	16026.2	2.14586	0.026764	80.1772	0	0
MT2A	ENSG00000125148.6	protein_coding	37426.8	1.63175	0.017189	94.9299	0	0
AKAP12	ENSG00000131016.12	protein_coding	2345.47	5.37937	0.101779	52.8534	0	0
VSTM2L	ENSG00000132821.7	protein_coding	2281.84	2.94512	0.0758738	38.816	0	0
BHLHE40	ENSG00000134107.4	protein_coding	3979.84	2.40808	0.05151	46.7499	0	0
LDHA	ENSG00000134333.9	protein_coding	43831.1	2.53337	0.0171841	147.425	0	0
GLUL	ENSG00000135821.12	protein_coding	5462.51	1.76152	0.0416672	42.2759	0	0
FAM129B	ENSG00000136830.7	protein_coding	8517.34	1.62408	0.036063	45.0345	0	0
DUSP6	ENSG00000139318.7	protein_coding	8610.37	1.60255	0.0344113	46.5705	0	0
IGFBP4	ENSG00000141753.5	protein_coding	21682.2	1.24045	0.0245155	50.5986	0	0
MCL1	ENSG00000143384.8	protein_coding	9772.02	2.81335	0.0344947	81.5589	0	0
RHOB	ENSG00000143878.8	protein_coding	1732.39	4.03621	0.0909175	44.3942	0	0
SLC20A1	ENSG00000144136.6	protein_coding	5508.91	2.20275	0.0425688	51.7457	0	0
IGFBP3	ENSG00000146674.10	protein_coding	1979.75	3.02431	0.0741524	40.785	0	0
ANKRD1	ENSG00000148677.6	protein_coding	7209.49	-3.99539	0.051195	-78.0426	0	0
ALDOA	ENSG00000149925.12	protein_coding	13154.6	1.03716	0.0265445	39.0727	0	0
SRFBP1	ENSG00000151304.5	protein_coding	1726.78	3.62888	0.0871195	41.654	0	0
ADAM8	ENSG00000151651.11	protein_coding	3219	2.28754	0.0607093	37.6803	0	0
MMP14	ENSG00000157227.8	protein_coding	10992.4	1.8111	0.0301657	60.0384	0	0
TSC22D3	ENSG00000157514.12	protein_coding	3697.32	4.68403	0.0715153	65.4969	0	0
STC1	ENSG00000159167.7	protein_coding	2126.57	2.97458	0.0743207	40.0236	0	0
ITGA5	ENSG00000161638.6	protein_coding	11263.6	3.74005	0.0366339	102.093	0	0
COL6A3	ENSG00000163359.11	protein_coding	1501.93	5.5606	0.135083	41.1644	0	0
NNMT	ENSG00000166741.3	protein_coding	1582.33	3.72228	0.0921774	40.3817	0	0
AXL	ENSG00000167601.7	protein_coding	6742.37	-1.59512	0.0398325	-40.0456	0	0
BEST1	ENSG00000167995.11	protein_coding	26494.7	0.86707	0.0203544	42.5986	0	0
FTH1	ENSG00000167996.11	protein_coding	34766	0.849723	0.0180129	47.1729	0	0
DDIT4	ENSG00000168209.4	protein_coding	7056.08	2.81984	0.0406017	69.4513	0	0
PLEC	ENSG00000178209.10	protein_coding	17930.2	1.66011	0.0237993	69.7547	0	0
CSF1	ENSG00000184371.9	protein_coding	4010.72	-2.10629	0.0530977	-39.6682	0	0
MT1X	ENSG00000187193.8	protein_coding	5614.12	4.30822	0.0540459	79.7141	0	0
ERO1L	ENSG00000197930.8	protein_coding	6528.43	1.48299	0.0378021	39.2303	0	0
MT-CO1	ENSG00000198804.2	protein_coding	220610	0.439004	0.010599	41.4195	0	0
TGM2	ENSG00000198959.7	protein_coding	5614.48	2.68974	0.0440047	61.124	0	0
HLA-DRA	ENSG00000204287.9	protein_coding	1239.06	5.08388	0.131209	38.7465	0	0
HLA-A	ENSG00000206503.7	protein_coding	11430.7	1.67203	0.0290345	57.5877	0	0
MT-RNR2	ENSG00000210082.2	Mt_rRNA	130455	1.5799	0.0113417	139.301	0	0
MT-RNR1	ENSG00000211459.2	Mt_rRNA	30092.8	2.65505	0.0206512	128.566	0	0
CTD-2328D6.1	ENSG00000226958.1	pseudogene	7127.86	4.99479	0.0546587	91.3814	0	0
VIM-AS1	ENSG00000229124.2	antisense	14875.3	1.03654	0.0258899	40.0364	0	0
HLA-B	ENSG00000234745.5	protein_coding	6961.98	2.44032	0.0395697	61.6716	0	0
RP11-124N14.3	ENSG00000234961.1	antisense	18393.9	0.948554	0.0247218	38.3691	0	0
RP11-442H21.2	ENSG00000269926.1	antisense	4804.5	2.84118	0.0483737	58.734	0	0
RP5-940J5.9	ENSG00000269968.1	antisense	20898.7	1.57744	0.0236845	66.6019	0	0
TMSB10	ENSG00000034510.4	protein_coding	13502.5	1.02539	0.0275091	37.2747	4.22419e-304	9.74955e-302
ADM	ENSG00000148926.5	protein_coding	2658.7	2.49991	0.0680597	36.7311	2.32806e-295	5.2986e-293
LGALS3	ENSG00000131981.11	protein_coding	5747.43	1.47963	0.0404154	36.6106	1.94162e-293	4.35854e-291
P4HA1	ENSG00000122884.8	protein_coding	2492.9	2.25327	0.0625002	36.0523	1.27101e-284	2.8146e-282
SDC4	ENSG00000124145.5	protein_coding	3010.91	2.09994	0.058644	35.8083	8.21732e-281	1.79543e-278
SLC3A2	ENSG00000168003.12	protein_coding	4988.8	-1.59695	0.0448164	-35.6333	4.27826e-278	9.22473e-276
ANGPTL4	ENSG00000167772.7	protein_coding	3208.18	9.09626	0.257289	35.3542	8.63527e-274	1.83774e-271
TLR2	ENSG00000137462.6	protein_coding	1002.19	4.31441	0.124367	34.6908	1.08361e-263	2.27655e-261
SAA1	ENSG00000173432.6	protein_coding	1589.12	7.40606	0.213709	34.6549	3.76543e-263	7.81066e-261
DKK1	ENSG00000107984.5	protein_coding	3506.59	-1.87495	0.0544352	-34.4437	5.59646e-260	1.14637e-257
EGLN3	ENSG00000129521.9	protein_coding	991.819	4.24345	0.124123	34.1876	3.69367e-256	7.47261e-254
MYOF	ENSG00000138119.12	protein_coding	9330.49	-1.11517	0.0326827	-34.1212	3.578e-255	7.15032e-253
RPLP0	ENSG00000089157.11	protein_coding	34884.5	0.635812	0.01873	33.9461	1.39078e-252	2.74587e-250
BIRC3	ENSG00000023445.9	protein_coding	1080.52	3.69633	0.108895	33.944	1.49397e-252	2.91448e-250
HTRA1	ENSG00000166033.7	protein_coding	2183.28	2.32984	0.0687079	33.9093	4.85988e-252	9.36927e-250
Z98256.1	ENSG00000183531.1	pseudogene	1749.45	-2.89661	0.0854531	-33.8971	7.34972e-252	1.40046e-249
PLIN2	ENSG00000147872.5	protein_coding	3799.42	1.65321	0.0489509	33.7729	4.93225e-250	9.29021e-248
RGS2	ENSG00000116741.6	protein_coding	1031.54	5.99923	0.177717	33.7571	8.4013e-250	1.56446e-247
SLC2A3	ENSG00000059804.11	protein_coding	2143.47	2.2356	0.0668432	33.4454	2.99995e-245	5.52362e-243
ZFP36L1	ENSG00000185650.8	protein_coding	6845.09	1.22157	0.0365295	33.4405	3.53734e-245	6.44071e-243
TXNRD1	ENSG00000198431.11	protein_coding	5084.97	-1.45984	0.0436709	-33.4281	5.35353e-245	9.64048e-243
CTSB	ENSG00000164733.16	protein_coding	4790.82	1.45659	0.0441229	33.0122	5.423e-239	9.65942e-237
SPRY4	ENSG00000187678.8	protein_coding	3046.63	1.8096	0.0550199	32.89	3.05896e-237	5.39003e-235
CRIM1	ENSG00000150938.5	protein_coding	2930.32	-1.94416	0.0591829	-32.8501	1.13653e-236	1.98131e-234
MKNK2	ENSG00000099875.10	protein_coding	2410.7	2.1226	0.0659449	32.1875	2.64375e-227	4.56034e-225
C10orf10	ENSG00000165507.8	protein_coding	996.885	3.63866	0.114713	31.7197	8.30131e-221	1.41702e-218
PEA15	ENSG00000162734.8	protein_coding	4738.62	-1.43065	0.0452443	-31.6206	1.92326e-219	3.24911e-217
RPS18	ENSG00000231500.2	protein_coding	24627.4	0.654408	0.020747	31.5422	2.29281e-218	3.8339e-216
CTSL	ENSG00000135047.10	protein_coding	3588.48	1.67993	0.0534051	31.4565	3.42552e-217	5.67011e-215
HPCAL1	ENSG00000115756.8	protein_coding	5225.59	1.32007	0.0421789	31.2969	5.13966e-215	8.42235e-213
TGFBI	ENSG00000120708.12	protein_coding	864.254	3.89302	0.124485	31.2729	1.08906e-214	1.76698e-212
LAMA5	ENSG00000130702.9	protein_coding	2711.83	1.83899	0.0589442	31.1988	1.10546e-213	1.776e-211
LAMB3	ENSG00000196878.8	protein_coding	7420.38	1.23022	0.0397258	30.9678	1.46515e-210	2.331e-208
CD59	ENSG00000085063.10	protein_coding	8410.45	1.12049	0.036404	30.7792	4.97399e-208	7.83738e-206
ABLIM3	ENSG00000173210.15	protein_coding	1602.55	2.4199	0.0789562	30.6487	2.75183e-206	4.2947e-204
HSPH1	ENSG00000120694.15	protein_coding	3698.08	-1.57875	0.051613	-30.5882	1.75761e-205	2.71716e-203
MALAT1	ENSG00000251562.3	lincRNA	1095.73	3.0568	0.100064	30.5485	5.92153e-205	9.06879e-203
TFRC	ENSG00000072274.8	protein_coding	1797.01	-2.40875	0.0793079	-30.3721	1.28426e-202	1.94862e-200
ITGB1	ENSG00000150093.14	protein_coding	14356.2	0.775681	0.0258698	29.984	1.58565e-197	2.38386e-195
ANXA3	ENSG00000138772.8	protein_coding	2283.86	-2.01048	0.0679039	-29.6077	1.19052e-192	1.77355e-190
RPL3	ENSG00000100316.11	protein_coding	17222.4	0.718296	0.0243033	29.5555	5.57383e-192	8.22868e-190
ITGA10	ENSG00000143127.8	protein_coding	767.678	3.79724	0.130301	29.1421	1.05141e-186	1.53835e-184
LAPTM5	ENSG00000162511.7	protein_coding	1261.51	2.59297	0.0890285	29.1251	1.72559e-186	2.50241e-184
CEBPB	ENSG00000172216.4	protein_coding	2407.51	1.83209	0.063349	28.9205	6.59152e-184	9.47502e-182
MT-CO2	ENSG00000198712.1	protein_coding	81967.1	0.404546	0.0139907	28.9155	7.62625e-184	1.08671e-181
RPL12	ENSG00000197958.8	protein_coding	14879.6	0.718612	0.0249793	28.7683	5.34431e-182	7.54976e-180
ERGIC1	ENSG00000113719.11	protein_coding	4480.93	1.34335	0.0469768	28.5961	7.51174e-180	1.05209e-177
COL5A1	ENSG00000130635.11	protein_coding	1010.25	2.93726	0.103069	28.498	1.24062e-178	1.72288e-176
ZMYND8	ENSG00000101040.15	protein_coding	2162.32	1.87572	0.0668306	28.0668	2.49435e-173	3.43487e-171
MAOA	ENSG00000189221.5	protein_coding	1414.09	2.40132	0.0855922	28.0553	3.43757e-173	4.69429e-171
TUBB	ENSG00000196230.8	protein_coding	33838	0.496357	0.0176957	28.0496	4.03554e-173	5.46532e-171
MT-ATP6	ENSG00000198899.2	protein_coding	53970.9	0.418709	0.0149461	28.0145	1.08049e-172	1.45131e-170
HIPK2	ENSG00000064393.11	protein_coding	1113.76	2.66948	0.0963826	27.6968	7.639e-169	1.01773e-166
SLC16A3	ENSG00000141526.10	protein_coding	4923.8	1.23807	0.0450949	27.4547	6.10129e-166	8.06305e-164
RPL7A	ENSG00000148303.12	protein_coding	16899.6	0.648665	0.0236908	27.3805	4.67833e-165	6.1331e-163
ATP1B1	ENSG00000143153.8	protein_coding	5041.57	-1.18617	0.0433998	-27.3313	1.80159e-164	2.34307e-162
ITGB4	ENSG00000132470.9	protein_coding	2575.27	1.69284	0.0620419	27.2853	6.3321e-164	8.17041e-162
RPL13	ENSG00000167526.9	protein_coding	13389	0.764935	0.0281201	27.2025	6.07348e-163	7.77548e-161
HSPA5	ENSG00000044574.7	protein_coding	23413.7	0.576338	0.0212923	27.068	2.34735e-161	2.98186e-159
SLC44A1	ENSG00000070214.11	protein_coding	1118.33	2.54148	0.0939307	27.057	3.16028e-161	3.98365e-159
SOD2	ENSG00000112096.12	protein_coding	3741.92	1.3673	0.050787	26.9223	1.2032e-159	1.5051e-157
IRS2	ENSG00000185950.7	protein_coding	997.579	2.71599	0.100915	26.9137	1.51912e-159	1.8859e-157
ACTN4	ENSG00000130402.7	protein_coding	8081.62	-0.921361	0.0343344	-26.8349	1.2654e-158	1.5591e-156
TPT1	ENSG00000133112.12	protein_coding	23666.6	0.597513	0.0224119	26.6605	1.35105e-156	1.65221e-154
CLMP	ENSG00000166250.7	protein_coding	1039.25	2.69395	0.101172	26.6275	3.2578e-156	3.95449e-154
SLAMF7	ENSG00000026751.12	protein_coding	1683.56	-5.33563	0.200423	-26.6219	3.78684e-156	4.56286e-154
S100A16	ENSG00000188643.6	protein_coding	4804.61	1.13752	0.0427772	26.5916	8.4834e-156	1.01473e-153
PER1	ENSG00000179094.9	protein_coding	663.529	4.13669	0.156402	26.4492	3.73022e-154	4.4295e-152
PLAT	ENSG00000104368.13	protein_coding	5702.3	-1.17267	0.0445313	-26.3335	7.92106e-153	9.3383e-151
ZFP36L2	ENSG00000152518.5	protein_coding	1254.94	2.50328	0.095276	26.274	3.80126e-152	4.44937e-150
SLC2A1	ENSG00000117394.15	protein_coding	7804.35	0.938953	0.035782	26.2409	9.07244e-152	1.0544e-149
CEBPD	ENSG00000221869.4	protein_coding	666.332	3.61516	0.137867	26.2221	1.48886e-151	1.71816e-149
COL6A1	ENSG00000142156.10	protein_coding	1862.77	1.84119	0.0704145	26.1479	1.04235e-150	1.19448e-148
BNIP3	ENSG00000176171.7	protein_coding	3011.18	1.51743	0.0583954	25.9855	7.23135e-149	8.22918e-147
PABPC1	ENSG00000070756.9	protein_coding	22948.1	0.546983	0.0210749	25.9542	1.63023e-148	1.84239e-146
APCDD1L	ENSG00000198768.6	protein_coding	568.923	4.24576	0.163877	25.9083	5.37579e-148	6.03377e-146
CHAC1	ENSG00000128965.7	protein_coding	1092.51	-2.69931	0.104662	-25.7908	1.12528e-146	1.25442e-144
TPM4	ENSG00000167460.10	protein_coding	12359.3	0.703797	0.0273435	25.7391	4.26961e-146	4.72744e-144
FBXO32	ENSG00000156804.3	protein_coding	2209.89	1.62355	0.0634336	25.5945	1.75504e-144	1.93019e-142
RPL10A	ENSG00000198755.6	protein_coding	12751.9	0.750096	0.0293481	25.5585	4.41184e-144	4.81979e-142
RPL31	ENSG00000071082.6	protein_coding	9197.08	0.813872	0.0318692	25.5379	7.48781e-144	8.12601e-142
CCND3	ENSG00000112576.8	protein_coding	2539.63	1.50534	0.0589907	25.5183	1.23493e-143	1.33137e-141
B4GALT1	ENSG00000086062.8	protein_coding	2385.04	1.57366	0.0616809	25.5129	1.41848e-143	1.51926e-141
GDF15	ENSG00000130513.6	protein_coding	1046.56	-2.73992	0.107867	-25.4009	2.46177e-142	2.61955e-140
TANC2	ENSG00000170921.10	protein_coding	1613.59	2.00096	0.0787943	25.3948	2.88016e-142	3.04498e-140
SLC7A5	ENSG00000103257.4	protein_coding	4966.38	-1.09802	0.0432427	-25.392	3.09088e-142	3.24681e-140
HSP90B1	ENSG00000166598.8	protein_coding	26652	0.499965	0.0197202	25.3529	8.35136e-142	8.7168e-140
LRP1	ENSG00000123384.9	protein_coding	2351.66	1.57128	0.0620603	25.3186	1.99538e-141	2.06951e-139
NFKBIA	ENSG00000100906.6	protein_coding	2307.07	1.59269	0.0629773	25.29	4.1179e-141	4.24403e-139
RN7SK	ENSG00000202198.1	misc_RNA	508.518	4.53458	0.18015	25.1712	8.29302e-140	8.49361e-138
TNIP1	ENSG00000145901.10	protein_coding	5315.51	1.03702	0.0413409	25.0846	7.32382e-139	7.45437e-137
HAS2	ENSG00000170961.6	protein_coding	551.027	3.85598	0.154428	24.9695	1.31123e-137	1.32637e-135
AREG	ENSG00000109321.6	protein_coding	499.46	4.71771	0.189488	24.8972	7.97303e-137	8.01559e-135
RPL13A	ENSG00000142541.12	protein_coding	22546.9	0.539522	0.0216764	24.8899	9.57464e-137	9.56705e-135
RPS3A	ENSG00000145425.5	protein_coding	17148.3	0.594463	0.0238986	24.8744	1.4074e-136	1.39776e-134
EFNB2	ENSG00000125266.6	protein_coding	793.972	2.83096	0.114357	24.7555	2.70468e-135	2.66998e-133
CSDE1	ENSG00000009307.11	protein_coding	9471.28	0.777255	0.0314308	24.7291	5.20019e-135	5.10272e-133
NOV	ENSG00000136999.4	protein_coding	939.384	-2.82315	0.114786	-24.5949	1.43323e-133	1.39799e-131
ATP1A1	ENSG00000163399.11	protein_coding	19021.7	0.557167	0.0227018	24.5428	5.161e-133	5.00434e-131
FASN	ENSG00000169710.6	protein_coding	7009.86	-0.934454	0.0381004	-24.5261	7.78341e-133	7.50275e-131
MT-ND4	ENSG00000198886.2	protein_coding	109882	0.29292	0.0120171	24.3752	3.13402e-131	3.00335e-129
TPI1	ENSG00000111669.10	protein_coding	7998.42	0.808925	0.0332613	24.3203	1.19524e-130	1.13874e-128
RPS8	ENSG00000142937.7	protein_coding	14299.7	0.644832	0.0265439	24.293	2.32395e-130	2.20131e-128
DOCK9	ENSG00000088387.13	protein_coding	2349.62	-1.60858	0.06678	-24.0877	3.35974e-128	3.16414e-126
NRP1	ENSG00000099250.13	protein_coding	4323.05	1.1365	0.047212	24.0723	4.87145e-128	4.56163e-126
S100A10	ENSG00000197747.4	protein_coding	4808.27	1.03385	0.0431496	23.9596	7.33378e-127	6.82833e-125
DDAH1	ENSG00000153904.14	protein_coding	976.876	-2.59888	0.108643	-23.9212	1.84525e-126	1.70837e-124
IGFBP7	ENSG00000163453.7	protein_coding	3940.32	-1.16515	0.0488733	-23.8403	1.27624e-125	1.17493e-123
NFIL3	ENSG00000165030.3	protein_coding	1243.6	2.35384	0.0990003	23.7761	5.90793e-125	5.40856e-123
GPRC5A	ENSG00000013588.5	protein_coding	2236.58	-1.58738	0.06688	-23.7348	1.57869e-124	1.43722e-122
DYSF	ENSG00000135636.9	protein_coding	801.977	-2.98122	0.12627	-23.6099	3.05278e-123	2.76387e-121
TFPI	ENSG00000003436.10	protein_coding	1990.18	1.59943	0.0677871	23.5949	4.34763e-123	3.91453e-121
SLC35D1	ENSG00000116704.6	protein_coding	720.788	2.82834	0.120136	23.5427	1.49072e-122	1.33489e-120
ADAMTS9	ENSG00000163638.9	protein_coding	542.348	3.63063	0.154228	23.5406	1.56552e-122	1.39425e-120
DEK	ENSG00000124795.10	protein_coding	3735.36	-1.18427	0.0506037	-23.4028	4.00458e-121	3.54719e-119
FTL	ENSG00000087086.9	protein_coding	27217.6	0.471481	0.0201503	23.3982	4.45808e-121	3.92767e-119
APLP2	ENSG00000084234.12	protein_coding	15364.1	0.591574	0.0253274	23.3571	1.16664e-120	1.02233e-118
PEG10	ENSG00000242265.1	protein_coding	1467.5	-1.97698	0.0847067	-23.3391	1.77697e-120	1.5489e-118
FDPS	ENSG00000160752.10	protein_coding	2678.2	-1.42609	0.06111	-23.3364	1.89426e-120	1.64239e-118
MAP4K4	ENSG00000071054.11	protein_coding	2971.06	1.27899	0.0550562	23.2307	2.2319e-119	1.92496e-117
RAB13	ENSG00000143545.4	protein_coding	1628.51	1.75843	0.0757586	23.211	3.52406e-119	3.0235e-117
RPL18A	ENSG00000105640.8	protein_coding	10551.8	0.675849	0.0291585	23.1785	7.50531e-119	6.4057e-117
S100A6	ENSG00000197956.5	protein_coding	33730.7	0.415924	0.0179704	23.145	1.63321e-118	1.3867e-116
PHC2	ENSG00000134686.12	protein_coding	3730.32	1.12479	0.0485995	23.1441	1.66634e-118	1.40754e-116
DHCR24	ENSG00000116133.7	protein_coding	5747.66	-0.992406	0.0429528	-23.1046	4.16589e-118	3.50084e-116
BIN1	ENSG00000136717.10	protein_coding	906.166	2.54062	0.109996	23.0973	4.92483e-118	4.11751e-116
CYR61	ENSG00000142871.11	protein_coding	7968.5	-2.04553	0.0886221	-23.0814	7.11165e-118	5.91567e-116
H6PD	ENSG00000049239.8	protein_coding	1341.34	2.06054	0.08974	22.9612	1.13963e-116	9.4319e-115
SRGN	ENSG00000122862.4	protein_coding	4221.61	1.0988	0.0478697	22.9539	1.34665e-116	1.10892e-114
AKR1B1	ENSG00000085662.9	protein_coding	3988.98	-1.11407	0.0486582	-22.8959	5.10628e-116	4.18383e-114
MFGE8	ENSG00000140545.10	protein_coding	4050.45	1.07676	0.0471677	22.8285	2.39269e-115	1.9507e-113
ACTG1	ENSG00000184009.5	protein_coding	26230.8	0.463826	0.0203966	22.7403	1.7899e-114	1.4485e-112
MT-ND5	ENSG00000198786.2	protein_coding	44493.6	0.401905	0.0176738	22.7402	1.79438e-114	1.4485e-112
ARRDC3	ENSG00000113369.4	protein_coding	920.815	2.50871	0.110444	22.7149	3.19426e-114	2.5659e-112
VIPR1	ENSG00000114812.8	protein_coding	1054.11	2.4357	0.108469	22.4553	1.13553e-111	9.07707e-110
RPL6	ENSG00000089009.11	protein_coding	17199.8	0.551877	0.024634	22.403	3.67652e-111	2.92462e-109
COL18A1	ENSG00000182871.10	protein_coding	1030.6	2.17998	0.0973996	22.3818	5.91657e-111	4.68381e-109
GBE1	ENSG00000114480.8	protein_coding	2583.63	1.31248	0.0586761	22.3682	8.03953e-111	6.33384e-109
CHST15	ENSG00000182022.13	protein_coding	1302.04	1.86192	0.0832864	22.3556	1.06542e-110	8.35361e-109
TGFBR2	ENSG00000163513.13	protein_coding	3480.71	1.13612	0.0508661	22.3355	1.67146e-110	1.30429e-108
GAA	ENSG00000171298.8	protein_coding	1043.06	2.13219	0.0956371	22.2946	4.17088e-110	3.23925e-108
HLA-C	ENSG00000204525.10	protein_coding	2866.71	1.29445	0.0585366	22.1136	2.33894e-108	1.80794e-106
SEC14L2	ENSG00000100003.13	protein_coding	507	3.53888	0.160101	22.104	2.8922e-108	2.22509e-106
ACAT2	ENSG00000120437.7	protein_coding	1618.87	-1.739	0.0787498	-22.0826	4.64514e-108	3.55701e-106
NCF2	ENSG00000116701.10	protein_coding	811.91	-2.69763	0.122578	-22.0075	2.44205e-107	1.8613e-105
WARS	ENSG00000140105.13	protein_coding	3895.46	-1.10031	0.0501253	-21.9511	8.44781e-107	6.40899e-105
MUC5B	ENSG00000117983.13	protein_coding	411.636	5.91229	0.270014	21.8962	2.82393e-106	2.13252e-104
MCM3	ENSG00000112118.13	protein_coding	1993.26	-1.57947	0.0721472	-21.8924	3.06959e-106	2.3074e-104
PLP2	ENSG00000102007.6	protein_coding	7002.57	0.8093	0.0371456	21.7872	3.06556e-105	2.29385e-103
AP000350.4	ENSG00000218537.1	protein_coding	3578.78	1.07293	0.0494591	21.6932	2.37873e-104	1.77183e-102
RPL8	ENSG00000161016.11	protein_coding	17911.3	0.514528	0.0237234	21.6887	2.62403e-104	1.9457e-102
PAWR	ENSG00000177425.6	protein_coding	1359.99	-1.86406	0.0859474	-21.6883	2.64362e-104	1.95139e-102
AMIGO2	ENSG00000139211.5	protein_coding	1078.35	-2.14531	0.0991117	-21.6454	6.72008e-104	4.9382e-102
CD55	ENSG00000196352.9	protein_coding	5011.35	-0.961317	0.0444582	-21.6229	1.09313e-103	7.99691e-102
CD99L2	ENSG00000102181.15	protein_coding	3383.08	1.09874	0.0509001	21.5862	2.42269e-103	1.76448e-101
MT1E	ENSG00000169715.10	protein_coding	6214.8	0.960341	0.0445281	21.5671	3.66189e-103	2.6552e-101
TUBGCP2	ENSG00000130640.9	protein_coding	2314.32	1.33763	0.0620322	21.5634	3.96272e-103	2.86066e-101
CCDC88A	ENSG00000115355.11	protein_coding	1436.89	1.80397	0.0837511	21.5397	6.61617e-103	4.75522e-101
SULT1B1	ENSG00000173597.4	protein_coding	365.605	5.40124	0.252453	21.395	1.48795e-101	1.06476e-99
RP11-290D2.6	ENSG00000273149.1	antisense	12649.6	0.57806	0.0270203	21.3936	1.53317e-101	1.09235e-99
ALPP	ENSG00000163283.6	protein_coding	641.945	-6.30209	0.294988	-21.3639	2.89467e-101	2.05346e-99
ENO1	ENSG00000074800.9	protein_coding	49709.2	0.328905	0.015483	21.2429	3.83353e-100	2.70776e-98
PLAUR	ENSG00000011422.7	protein_coding	1778.06	1.4965	0.0704882	21.2305	4.991e-100	3.5102e-98
MT-CYB	ENSG00000198727.2	protein_coding	27392.4	0.415461	0.0196175	21.178	1.52205e-99	1.06589e-97
LEPREL1	ENSG00000090530.5	protein_coding	721.444	-2.6839	0.127322	-21.0797	1.22194e-98	8.52082e-97
ICAM1	ENSG00000090339.4	protein_coding	2626.55	1.21233	0.0577538	20.9914	7.86396e-98	5.46045e-96
EIF4B	ENSG00000063046.13	protein_coding	5782.61	0.862131	0.0410998	20.9765	1.07493e-97	7.43244e-96
ALOX15B	ENSG00000179593.11	protein_coding	1397.99	9.99519	0.476729	20.9662	1.33535e-97	9.19428e-96
RPL29	ENSG00000162244.6	protein_coding	8588.06	0.699251	0.0333641	20.9582	1.5799e-97	1.08326e-95
METTL9	ENSG00000197006.9	protein_coding	1654.42	1.55702	0.0743767	20.9342	2.61449e-97	1.78515e-95
DNER	ENSG00000187957.7	protein_coding	464.764	3.26916	0.156583	20.8781	8.46253e-97	5.75417e-95
SHMT2	ENSG00000182199.6	protein_coding	3514.78	-1.11456	0.0535584	-20.8102	3.501e-96	2.3707e-94
IARS	ENSG00000196305.13	protein_coding	5280.84	-0.923278	0.0443754	-20.8061	3.81185e-96	2.57057e-94
PPP2R2C	ENSG00000074211.9	protein_coding	495.62	3.18217	0.153221	20.7686	8.3323e-96	5.59596e-94
TIPARP	ENSG00000163659.8	protein_coding	1123.87	1.95115	0.094174	20.7185	2.35759e-95	1.57689e-93
TTC3	ENSG00000182670.9	protein_coding	3053.18	1.23254	0.0596818	20.6519	9.37758e-95	6.24676e-93
CDC6	ENSG00000094804.5	protein_coding	611.906	-3.03625	0.14707	-20.645	1.08297e-94	7.18488e-93
MOB3A	ENSG00000172081.9	protein_coding	1797.65	1.45882	0.0707519	20.6189	1.85876e-94	1.22821e-92
ZFP36	ENSG00000128016.4	protein_coding	790.117	2.32959	0.113122	20.5937	3.12722e-94	2.05806e-92
CTGF	ENSG00000118523.5	protein_coding	2331.26	-1.33141	0.0647127	-20.5742	4.67373e-94	3.06354e-92
NQO1	ENSG00000181019.8	protein_coding	1484.2	-1.67227	0.0813237	-20.5632	5.86953e-94	3.83203e-92
RPL28	ENSG00000108107.8	protein_coding	8250.28	0.70103	0.0341797	20.5101	1.74876e-93	1.13718e-91
KISS1	ENSG00000170498.7	protein_coding	561.662	-6.10769	0.297878	-20.504	1.98464e-93	1.28547e-91
LAMB2	ENSG00000172037.9	protein_coding	4854.22	0.894244	0.0436577	20.483	3.04979e-93	1.9676e-91
LOXL4	ENSG00000138131.3	protein_coding	1318.17	2.02582	0.0991498	20.4319	8.69895e-93	5.59018e-91
KLF9	ENSG00000119138.3	protein_coding	851.288	2.26748	0.1113	20.3726	2.92554e-92	1.87269e-90
MMP1	ENSG00000196611.4	protein_coding	2274.61	1.2795	0.0628072	20.3719	2.97146e-92	1.89468e-90
SQSTM1	ENSG00000161011.15	protein_coding	7929.4	-0.706763	0.0348244	-20.295	1.42237e-91	9.03428e-90
ELK3	ENSG00000111145.3	protein_coding	2552.93	1.19501	0.0589428	20.274	2.18243e-91	1.38083e-89
CCNI	ENSG00000118816.5	protein_coding	5001.17	0.858318	0.0424395	20.2245	5.95577e-91	3.75374e-89
RPS24	ENSG00000138326.14	protein_coding	10424.2	0.605543	0.0299624	20.2101	7.97959e-91	5.01002e-89
PYGB	ENSG00000100994.7	protein_coding	5919.21	0.793695	0.0392758	20.2083	8.28121e-91	5.17955e-89
DAPK1	ENSG00000196730.8	protein_coding	652.994	-2.81175	0.139387	-20.1723	1.71496e-90	1.06855e-88
AIM1	ENSG00000112297.10	protein_coding	614.95	2.54364	0.126238	20.1495	2.71665e-90	1.68628e-88
GPX1	ENSG00000233276.2	protein_coding	2239.22	1.3155	0.0652877	20.1492	2.73231e-90	1.6896e-88
FST	ENSG00000134363.7	protein_coding	606.529	-2.87581	0.14293	-20.1204	4.88944e-90	3.01215e-88
PMEPA1	ENSG00000124225.11	protein_coding	591.333	2.69644	0.134182	20.0955	8.08125e-90	4.95983e-88
NT5C2	ENSG00000076685.14	protein_coding	1868.09	-1.49588	0.0745026	-20.0783	1.14279e-89	6.98763e-88
P4HA2	ENSG00000072682.14	protein_coding	1121.9	1.79869	0.0898882	20.0103	4.48033e-89	2.72934e-87
BMP4	ENSG00000125378.11	protein_coding	1032.26	-2.13061	0.106534	-19.9993	5.58197e-89	3.38784e-87
CMKLR1	ENSG00000174600.9	protein_coding	313.847	5.245	0.262462	19.9838	7.61421e-89	4.60421e-87
DHCR7	ENSG00000172893.11	protein_coding	2916.05	-1.15206	0.0577364	-19.9537	1.39067e-88	8.37826e-87
CORO1C	ENSG00000110880.6	protein_coding	4900.28	-0.895431	0.0449075	-19.9395	1.85044e-88	1.11074e-86
JAG1	ENSG00000101384.7	protein_coding	1196.04	1.73986	0.0875858	19.8647	8.22862e-88	4.92126e-86
SOX4	ENSG00000124766.4	protein_coding	755.281	2.27179	0.114738	19.7998	2.98908e-87	1.78116e-85
BTG1	ENSG00000133639.3	protein_coding	2308.44	1.26004	0.0636447	19.798	3.09493e-87	1.83756e-85
CPE	ENSG00000109472.9	protein_coding	1247.07	1.66567	0.0844057	19.7342	1.09766e-86	6.49361e-85
RPL10	ENSG00000147403.12	protein_coding	13595	0.631452	0.0320111	19.7261	1.28842e-86	7.59475e-85
PSAT1	ENSG00000135069.9	protein_coding	2814.17	-1.16237	0.0591503	-19.6511	5.65403e-86	3.32088e-84
PAM	ENSG00000145730.16	protein_coding	3202.33	1.03731	0.0528538	19.626	9.27748e-86	5.42964e-84
RPL15	ENSG00000174748.14	protein_coding	12198.4	0.577074	0.0294304	19.6081	1.31825e-85	7.68763e-84
TCN2	ENSG00000185339.4	protein_coding	363.335	3.66737	0.187063	19.605	1.4004e-85	8.13771e-84
UBB	ENSG00000170315.9	protein_coding	7533.25	-0.704304	0.0359447	-19.5941	1.73562e-85	1.005e-83
ANXA2	ENSG00000182718.12	protein_coding	24043.4	0.409831	0.0209197	19.5907	1.85795e-85	1.07205e-83
AOX1	ENSG00000138356.9	protein_coding	1444.03	1.5245	0.0781479	19.5079	9.40302e-85	5.40657e-83
TENC1	ENSG00000111077.13	protein_coding	656.197	2.4047	0.123492	19.4725	1.88003e-84	1.07721e-82
SAT1	ENSG00000130066.12	protein_coding	2716.98	1.12716	0.0578876	19.4715	1.91469e-84	1.09324e-82
NEBL	ENSG00000078114.14	protein_coding	311.442	4.56707	0.234739	19.4559	2.59642e-84	1.47735e-82
RPS2	ENSG00000140988.11	protein_coding	11045.4	0.569721	0.0292865	19.4534	2.72974e-84	1.54783e-82
TACSTD2	ENSG00000184292.5	protein_coding	1213.9	-1.75149	0.0900366	-19.4531	2.74334e-84	1.55017e-82
CSNK1D	ENSG00000141551.10	protein_coding	3347.31	0.995365	0.0511743	19.4505	2.88723e-84	1.62588e-82
CCND1	ENSG00000110092.3	protein_coding	6023.46	-0.761023	0.0391704	-19.4285	4.43024e-84	2.48625e-82
ARHGAP5	ENSG00000100852.8	protein_coding	3231.64	1.0076	0.0519546	19.3938	8.69789e-84	4.86459e-82
EEF2	ENSG00000167658.11	protein_coding	22241.3	0.41104	0.0211959	19.3924	8.94932e-84	4.98818e-82
P4HB	ENSG00000185624.10	protein_coding	10681.3	0.608619	0.0314445	19.3553	1.83812e-83	1.02106e-81
HSPA1B	ENSG00000204388.5	protein_coding	1890.18	1.31178	0.0681753	19.2413	1.67048e-82	9.24803e-81
GGT5	ENSG00000099998.13	protein_coding	1257.32	1.69015	0.0880491	19.1956	4.02921e-82	2.22312e-80
HCG4P5	ENSG00000227766.1	pseudogene	1202.21	1.67952	0.0875458	19.1845	4.9877e-82	2.74273e-80
GPI	ENSG00000105220.10	protein_coding	4062.44	0.902394	0.0472389	19.1028	2.39492e-81	1.31256e-79
PTPRU	ENSG00000060656.15	protein_coding	1434.8	1.56421	0.0818922	19.1009	2.48237e-81	1.35595e-79
ENO2	ENSG00000111674.4	protein_coding	1154.44	1.68841	0.0884093	19.0977	2.6391e-81	1.43677e-79
NOX5	ENSG00000255346.5	protein_coding	298.979	4.20186	0.220318	19.0718	4.3327e-81	2.35099e-79
RPL23	ENSG00000125691.8	protein_coding	11677.7	0.544993	0.0286169	19.0445	7.30291e-81	3.9496e-79
PYGL	ENSG00000100504.12	protein_coding	2613.85	1.09389	0.0574568	19.0385	8.19096e-81	4.4153e-79
ESYT2	ENSG00000117868.11	protein_coding	5392.01	0.777385	0.0408874	19.0128	1.3356e-80	7.1759e-79
KRT19	ENSG00000171345.9	protein_coding	5531.59	0.767839	0.0404121	19.0002	1.69766e-80	9.09134e-79
JUNB	ENSG00000171223.4	protein_coding	1650.47	1.38243	0.0727875	18.9926	1.96273e-80	1.04767e-78
PKM	ENSG00000067225.13	protein_coding	27529.8	0.365464	0.0192746	18.9609	3.59099e-80	1.91057e-78
PNRC1	ENSG00000146278.10	protein_coding	1118.34	1.75725	0.0927116	18.954	4.09323e-80	2.17074e-78
DST	ENSG00000151914.13	protein_coding	6660.79	0.69769	0.0368391	18.9388	5.46036e-80	2.88642e-78
C4orf3	ENSG00000164096.10	protein_coding	2020.99	1.24232	0.0656197	18.9321	6.20355e-80	3.26873e-78
ARHGEF28	ENSG00000214944.5	protein_coding	1661.55	-1.55296	0.082432	-18.8393	3.60006e-79	1.89084e-77
ACSL1	ENSG00000151726.9	protein_coding	1451.25	1.45969	0.0779135	18.7348	2.5758e-78	1.34855e-76
SAMD12	ENSG00000177570.9	protein_coding	674.383	-2.38066	0.127191	-18.7173	3.58134e-78	1.86903e-76
FAM83A	ENSG00000147689.12	protein_coding	719.954	2.12103	0.113839	18.6319	1.77277e-77	9.22233e-76
RBPJ	ENSG00000168214.16	protein_coding	2527.88	1.09385	0.058718	18.6288	1.8765e-77	9.73107e-76
LTBP3	ENSG00000168056.10	protein_coding	583.494	2.39972	0.128853	18.6236	2.06662e-77	1.06832e-75
IL8	ENSG00000169429.6	protein_coding	566.47	2.48251	0.133504	18.595	3.52853e-77	1.8183e-75
KLF6	ENSG00000067082.10	protein_coding	2940.76	1.00817	0.054297	18.5676	5.87307e-77	3.01699e-75
PPP1R18	ENSG00000146112.7	protein_coding	5891.51	0.742931	0.0402155	18.4738	3.35784e-76	1.71953e-74
GPX3	ENSG00000211445.7	protein_coding	752.782	2.09232	0.113324	18.4632	4.08388e-76	2.08481e-74
RPL37	ENSG00000145592.9	protein_coding	12682.4	0.497351	0.0269464	18.457	4.57877e-76	2.3302e-74
CA9	ENSG00000107159.8	protein_coding	332.886	6.7048	0.363348	18.4528	4.94896e-76	2.51079e-74
TRIB1	ENSG00000173334.3	protein_coding	1175.01	1.6665	0.0903791	18.439	6.39657e-76	3.2352e-74
IFITM3	ENSG00000142089.11	protein_coding	3547.79	0.960177	0.0521372	18.4164	9.71249e-76	4.89719e-74
BNIP3L	ENSG00000104765.10	protein_coding	2521.58	1.11787	0.0607571	18.399	1.33716e-75	6.72149e-74
XXbac-BPG252P9.9	ENSG00000272540.1	antisense	11257.3	0.519275	0.0282887	18.3563	2.94194e-75	1.4743e-73
AK4	ENSG00000162433.10	protein_coding	1675.88	1.38603	0.0755269	18.3515	3.21391e-75	1.60568e-73
GNB2L1	ENSG00000204628.7	protein_coding	21926.4	0.388385	0.0211651	18.3503	3.28482e-75	1.63612e-73
PFKFB3	ENSG00000170525.14	protein_coding	1532.18	1.38872	0.0758576	18.3069	7.28416e-75	3.61558e-73
TNFRSF10D	ENSG00000173530.5	protein_coding	1355.13	1.5806	0.0863396	18.3068	7.30308e-75	3.61558e-73
GYS1	ENSG00000104812.10	protein_coding	1143.06	1.66689	0.0910654	18.3043	7.64954e-75	3.77569e-73
LBP	ENSG00000129988.5	protein_coding	485.715	8.12393	0.445029	18.2548	1.89426e-74	9.32172e-73
ECE1	ENSG00000117298.10	protein_coding	3061.65	1.02766	0.0563026	18.2525	1.97513e-74	9.69053e-73
SARS	ENSG00000031698.8	protein_coding	4030.85	-0.869975	0.047702	-18.2377	2.59024e-74	1.26705e-72
RUSC1-AS1	ENSG00000225855.2	antisense	1574.36	-1.39491	0.0768481	-18.1515	1.2486e-73	6.08951e-72
HMGCS1	ENSG00000112972.10	protein_coding	1288.26	-1.56985	0.086494	-18.1499	1.28731e-73	6.25968e-72
COL7A1	ENSG00000114270.11	protein_coding	260.889	4.82782	0.266257	18.1322	1.77509e-73	8.60602e-72
C4BPB	ENSG00000123843.8	protein_coding	398.268	-3.54071	0.195341	-18.1258	1.99572e-73	9.64718e-72
AJUBA	ENSG00000129474.11	protein_coding	1578.48	-1.4352	0.0792135	-18.1182	2.29079e-73	1.10409e-71
RPS14	ENSG00000164587.7	protein_coding	4604.46	0.822423	0.0453953	18.1169	2.34293e-73	1.12591e-71
E2F7	ENSG00000165891.11	protein_coding	1151.13	-1.65322	0.0913322	-18.1012	3.12007e-73	1.49499e-71
DCN	ENSG00000011465.12	protein_coding	569.146	8.65806	0.478336	18.1004	3.16577e-73	1.51246e-71
RPL5	ENSG00000122406.8	protein_coding	13739.9	0.53321	0.0294618	18.0984	3.28267e-73	1.56375e-71
NUCB1	ENSG00000104805.11	protein_coding	2764.2	1.06293	0.0590343	18.0054	1.76827e-72	8.399e-71
TNFAIP3	ENSG00000118503.10	protein_coding	477.558	2.91261	0.161895	17.9907	2.30246e-72	1.09047e-70
HNRNPA2B1	ENSG00000122566.16	protein_coding	6719.6	-0.716614	0.0400029	-17.914	9.16476e-72	4.32804e-70
EIF3E	ENSG00000104408.5	protein_coding	6669.31	0.658803	0.0368945	17.8564	2.57677e-71	1.21338e-69
SRRM2	ENSG00000167978.12	protein_coding	5670.85	0.714235	0.0400185	17.8476	3.01625e-71	1.41625e-69
FAH	ENSG00000103876.7	protein_coding	593.942	2.24971	0.126196	17.827	4.36012e-71	2.04141e-69
RPL9	ENSG00000163682.11	protein_coding	6833.7	0.686652	0.0385207	17.8255	4.47856e-71	2.09089e-69
HLA-DPA1	ENSG00000231389.3	protein_coding	243.397	4.93016	0.277653	17.7566	1.53343e-70	7.13871e-69
SEZ6L2	ENSG00000174938.10	protein_coding	766.902	2.12076	0.119636	17.7268	2.60514e-70	1.20936e-68
RRAS	ENSG00000126458.3	protein_coding	1095.66	1.61126	0.0909337	17.7191	2.98601e-70	1.38225e-68
ITGA1	ENSG00000213949.4	protein_coding	697.852	2.10376	0.118761	17.7142	3.25782e-70	1.50383e-68
ARHGAP29	ENSG00000137962.8	protein_coding	2311.81	-1.16221	0.0656359	-17.7069	3.70686e-70	1.7063e-68
HILPDA	ENSG00000135245.9	protein_coding	322.392	3.32252	0.188148	17.659	8.67069e-70	3.98002e-68
CDC42BPA	ENSG00000143776.14	protein_coding	2701.15	0.996787	0.0564669	17.6526	9.71987e-70	4.44915e-68
NEXN	ENSG00000162614.14	protein_coding	559.219	-2.57536	0.146397	-17.5916	2.8558e-69	1.30357e-67
MARCKSL1	ENSG00000175130.6	protein_coding	2473.68	1.0363	0.0590407	17.5523	5.70773e-69	2.59813e-67
ACLY	ENSG00000131473.12	protein_coding	5424.27	-0.726714	0.0415299	-17.4986	1.46911e-68	6.66879e-67
SCNN1A	ENSG00000111319.8	protein_coding	299.279	3.46575	0.198337	17.4741	2.25652e-68	1.02148e-66
AKAP13	ENSG00000170776.15	protein_coding	1093.2	1.67104	0.0961026	17.3881	1.01561e-67	4.58482e-66
ITIH2	ENSG00000151655.13	protein_coding	239.967	4.7662	0.274507	17.3628	1.57873e-67	7.10731e-66
TCF19	ENSG00000137310.7	protein_coding	460.639	-2.86574	0.165369	-17.3293	2.82576e-67	1.26865e-65
ATP1B3	ENSG00000069849.6	protein_coding	1995.36	-1.17425	0.0678612	-17.3037	4.41216e-67	1.97546e-65
LGALS3BP	ENSG00000108679.8	protein_coding	9026.56	0.546296	0.0316471	17.2621	9.07656e-67	4.05279e-65
DNMT1	ENSG00000130816.10	protein_coding	1945.78	-1.20747	0.0700347	-17.241	1.3075e-66	5.82227e-65
PODXL	ENSG00000128567.12	protein_coding	2280.58	-1.10799	0.0643041	-17.2304	1.56976e-66	6.97118e-65
ZCCHC6	ENSG00000083223.13	protein_coding	811.001	1.81589	0.105427	17.2241	1.75041e-66	7.75243e-65
THBS1	ENSG00000137801.9	protein_coding	2444.52	1.04964	0.0609604	17.2184	1.93354e-66	8.54042e-65
SH3D19	ENSG00000109686.12	protein_coding	9112.74	0.561454	0.0327029	17.1683	4.58359e-66	2.01912e-64
EMP1	ENSG00000134531.5	protein_coding	3736.72	0.869101	0.0506716	17.1516	6.11221e-66	2.68528e-64
SLK	ENSG00000065613.9	protein_coding	2221.9	1.09179	0.0636743	17.1465	6.67118e-66	2.92301e-64
UGP2	ENSG00000169764.10	protein_coding	2013.98	1.11689	0.0653536	17.09	1.76158e-65	7.69786e-64
RORA	ENSG00000069667.11	protein_coding	314.283	3.26253	0.191194	17.0639	2.75326e-65	1.19994e-63
SLC7A11	ENSG00000151012.9	protein_coding	1062.89	-1.62363	0.0953197	-17.0336	4.62929e-65	2.01221e-63
HLA-E	ENSG00000204592.5	protein_coding	7541	0.600658	0.0353131	17.0095	6.98171e-65	3.0267e-63
TPP1	ENSG00000166340.10	protein_coding	3272.77	0.882058	0.0519098	16.9921	9.38871e-65	4.05944e-63
MUC1	ENSG00000185499.12	protein_coding	290.387	3.36598	0.198191	16.9836	1.08662e-64	4.6859e-63
LIMA1	ENSG00000050405.9	protein_coding	1123.82	-1.60547	0.0947281	-16.9482	1.98459e-64	8.53581e-63
PGF	ENSG00000119630.9	protein_coding	588.813	2.12379	0.125467	16.9271	2.84204e-64	1.21918e-62
RPS6	ENSG00000137154.8	protein_coding	12646	0.476087	0.0281498	16.9126	3.63051e-64	1.55335e-62
HSPA6	ENSG00000173110.6	protein_coding	226.007	5.64437	0.33429	16.8846	5.83695e-64	2.49089e-62
FUS	ENSG00000089280.14	protein_coding	3052.03	-0.938514	0.055674	-16.8573	9.27247e-64	3.9467e-62
PRICKLE2	ENSG00000163637.7	protein_coding	254.731	3.83631	0.227871	16.8355	1.34075e-63	5.69192e-62
MT-ND6	ENSG00000198695.2	protein_coding	14220.7	0.485578	0.0288727	16.8179	1.80515e-63	7.64367e-62
PINK1	ENSG00000158828.5	protein_coding	2659.94	-0.991264	0.0589429	-16.8173	1.82133e-63	7.6923e-62
SFN	ENSG00000175793.10	protein_coding	1252.37	-1.45023	0.0863774	-16.7895	2.91464e-63	1.22782e-61
AMOTL2	ENSG00000114019.10	protein_coding	726.871	-2.05871	0.122863	-16.7562	5.10035e-63	2.14306e-61
PLOD2	ENSG00000152952.7	protein_coding	2142.28	1.08187	0.0646309	16.7392	6.78822e-63	2.84498e-61
RPL39	ENSG00000198918.7	protein_coding	6671.02	0.609153	0.0364625	16.7063	1.17942e-62	4.93039e-61
CDCP1	ENSG00000163814.3	protein_coding	5589.48	0.719983	0.0431875	16.6711	2.12617e-62	8.86552e-61
PHF3	ENSG00000118482.7	protein_coding	2438.67	0.982039	0.0593501	16.5465	1.69555e-61	7.05201e-60
TPBG	ENSG00000146242.5	protein_coding	1871.43	1.12925	0.0682811	16.5383	1.94578e-61	8.07226e-60
EPHA2	ENSG00000142627.9	protein_coding	3590.97	-0.882923	0.0535407	-16.4907	4.28034e-61	1.77126e-59
DPYD	ENSG00000188641.8	protein_coding	749.885	1.8103	0.10982	16.4843	4.761e-61	1.9652e-59
ST3GAL5	ENSG00000115525.12	protein_coding	365.022	2.7702	0.168231	16.4667	6.36532e-61	2.62082e-59
AGRN	ENSG00000188157.9	protein_coding	1617.56	1.3303	0.080874	16.449	8.52364e-61	3.50068e-59
LAYN	ENSG00000204381.7	protein_coding	615.201	-2.19021	0.133283	-16.4327	1.11537e-60	4.56941e-59
KIAA1551	ENSG00000174718.7	protein_coding	719.256	1.90344	0.11637	16.3568	3.88845e-60	1.58903e-58
PPFIBP1	ENSG00000110841.9	protein_coding	1047.23	1.50703	0.0921467	16.3547	4.02943e-60	1.64254e-58
NCOR2	ENSG00000196498.9	protein_coding	2616.54	0.959168	0.0586637	16.3503	4.33002e-60	1.76069e-58
PTPN12	ENSG00000127947.11	protein_coding	2017.77	1.09452	0.0670412	16.3261	6.43935e-60	2.61192e-58
GOLGB1	ENSG00000173230.11	protein_coding	1758.88	1.17872	0.0724015	16.2804	1.36052e-59	5.50491e-58
PLK2	ENSG00000145632.10	protein_coding	875.318	-1.72366	0.105887	-16.2783	1.4074e-59	5.68057e-58
CSF3	ENSG00000108342.8	protein_coding	254.383	6.84288	0.420561	16.2708	1.58976e-59	6.40082e-58
CA12	ENSG00000074410.9	protein_coding	432.795	2.40183	0.147894	16.2402	2.62035e-59	1.05244e-57
CLCN4	ENSG00000073464.7	protein_coding	557.758	-2.36597	0.145879	-16.2187	3.71968e-59	1.49033e-57
CXCL1	ENSG00000163739.4	protein_coding	235.634	3.77056	0.232493	16.218	3.76461e-59	1.50465e-57
CITED2	ENSG00000164442.8	protein_coding	3684.13	0.793553	0.0489316	16.2176	3.78633e-59	1.50965e-57
TBC1D2	ENSG00000095383.15	protein_coding	1204.05	-1.42669	0.0881175	-16.1908	5.8544e-59	2.32854e-57
TFPI2	ENSG00000105825.7	protein_coding	481.168	2.35546	0.145692	16.1675	8.55412e-59	3.3941e-57
LDHAP4	ENSG00000214110.3	pseudogene	432.607	2.49753	0.15485	16.1287	1.6046e-58	6.35137e-57
CD9	ENSG00000010278.7	protein_coding	2599.54	-0.97835	0.0607638	-16.1009	2.51526e-58	9.93195e-57
EXT1	ENSG00000182197.6	protein_coding	4760.23	-0.705364	0.0438966	-16.0688	4.22442e-58	1.66408e-56
HNRNPD	ENSG00000138668.14	protein_coding	3047	-0.886923	0.055226	-16.0599	4.87652e-58	1.91635e-56
LAMA3	ENSG00000053747.11	protein_coding	818.109	1.70034	0.106005	16.0401	6.70165e-58	2.62727e-56
IQSEC2	ENSG00000124313.8	protein_coding	746.685	1.77131	0.11093	15.9679	2.1385e-57	8.36361e-56
FAM13A	ENSG00000138640.10	protein_coding	719.358	1.7817	0.111664	15.9559	2.59126e-57	1.01102e-55
HIST1H2BK	ENSG00000197903.6	protein_coding	2218.01	1.00691	0.0632827	15.9113	5.29247e-57	2.06004e-55
MYO18A	ENSG00000196535.10	protein_coding	692.799	-1.91541	0.120413	-15.9071	5.65943e-57	2.19766e-55
FEN1	ENSG00000168496.3	protein_coding	723.183	-1.8684	0.117547	-15.8949	6.86996e-57	2.66142e-55
NACA	ENSG00000196531.6	protein_coding	7965.55	0.556416	0.0350989	15.8528	1.34388e-56	5.19392e-55
CDCA7L	ENSG00000164649.15	protein_coding	812.804	-1.80026	0.113636	-15.8424	1.58743e-56	6.12075e-55
ADAMTS12	ENSG00000151388.6	protein_coding	884.605	-1.69757	0.107169	-15.8402	1.64413e-56	6.3245e-55
PCSK9	ENSG00000169174.9	protein_coding	1713.72	-1.16238	0.0734892	-15.8171	2.37276e-56	9.10596e-55
DDX58	ENSG00000107201.5	protein_coding	1506.3	-1.25058	0.0792333	-15.7834	4.04476e-56	1.54863e-54
TNFAIP8L3	ENSG00000183578.5	protein_coding	193.968	5.07863	0.321837	15.7801	4.26465e-56	1.62902e-54
TGFB1	ENSG00000105329.5	protein_coding	2729.61	0.892975	0.0565957	15.7781	4.39935e-56	1.67656e-54
IDI1	ENSG00000067064.6	protein_coding	2319.28	-0.984956	0.0624446	-15.7733	4.75284e-56	1.80707e-54
C12orf75	ENSG00000235162.4	protein_coding	787.47	-1.74669	0.111175	-15.7112	1.26772e-55	4.80881e-54
SQLE	ENSG00000104549.7	protein_coding	1516.04	-1.25269	0.0797409	-15.7095	1.3027e-55	4.93011e-54
SLC7A2	ENSG00000003989.12	protein_coding	559.901	2.05698	0.130981	15.7045	1.40906e-55	5.32032e-54
S100P	ENSG00000163993.6	protein_coding	514.679	2.12015	0.135133	15.6894	1.78834e-55	6.73691e-54
TYMS	ENSG00000176890.11	protein_coding	618.054	-2.00804	0.127994	-15.6886	1.81009e-55	6.80319e-54
ST3GAL1	ENSG00000008513.10	protein_coding	1339.29	1.27946	0.0815667	15.6861	1.88251e-55	7.0592e-54
DNAJB1	ENSG00000132002.3	protein_coding	4053.57	0.753448	0.0480506	15.6803	2.06267e-55	7.7171e-54
TJP2	ENSG00000119139.12	protein_coding	691.972	-1.92985	0.123119	-15.6746	2.2574e-55	8.42641e-54
EDIL3	ENSG00000164176.8	protein_coding	910.16	-1.63695	0.104537	-15.6591	2.87914e-55	1.07228e-53
MYL12B	ENSG00000118680.8	protein_coding	5628.8	-0.72987	0.0466106	-15.6589	2.88949e-55	1.0737e-53
RPL4	ENSG00000174444.10	protein_coding	15442.4	0.403529	0.0257738	15.6565	2.99841e-55	1.11165e-53
KDM5B	ENSG00000117139.12	protein_coding	975.178	1.49767	0.0957179	15.6467	3.49651e-55	1.29339e-53
SBNO1	ENSG00000139697.7	protein_coding	1717.52	1.24045	0.0793375	15.6352	4.19422e-55	1.54799e-53
EGR1	ENSG00000120738.7	protein_coding	1383.39	1.22997	0.0787163	15.6253	4.897e-55	1.80331e-53
SERPINA1	ENSG00000197249.8	protein_coding	228.391	6.8191	0.437069	15.6019	7.06882e-55	2.59724e-53
RP11-138I1.4	ENSG00000265401.1	antisense	5260.79	-0.642352	0.0412089	-15.5877	8.82681e-55	3.23591e-53
GNAS	ENSG00000087460.19	protein_coding	15363.1	0.385944	0.0247606	15.587	8.92367e-55	3.26411e-53
EMP2	ENSG00000213853.5	protein_coding	932.429	1.72692	0.111109	15.5426	1.78708e-54	6.52223e-53
ZC3H12A	ENSG00000163874.8	protein_coding	278.868	3.16259	0.203605	15.533	2.07506e-54	7.55646e-53
FOSL1	ENSG00000175592.4	protein_coding	4251.62	-0.765	0.0492891	-15.5207	2.51413e-54	9.13505e-53
DNAJC6	ENSG00000116675.11	protein_coding	375.198	-2.84329	0.183217	-15.5187	2.59372e-54	9.40338e-53
CTNNB1	ENSG00000168036.12	protein_coding	3761.21	0.775257	0.0499589	15.5179	2.62591e-54	9.49908e-53
MYADM	ENSG00000179820.11	protein_coding	2645.79	0.928805	0.0598638	15.5153	2.73393e-54	9.86803e-53
IDS	ENSG00000010404.13	protein_coding	3728.93	-0.758691	0.0489335	-15.5045	3.23232e-54	1.16413e-52
TBC1D16	ENSG00000167291.11	protein_coding	794.698	1.6419	0.105972	15.4938	3.82251e-54	1.37367e-52
STEAP3	ENSG00000115107.15	protein_coding	2400.93	0.95177	0.0614751	15.4822	4.57485e-54	1.64044e-52
TRIB2	ENSG00000071575.7	protein_coding	915.208	1.52552	0.098562	15.4777	4.90384e-54	1.75457e-52
TNKS1BP1	ENSG00000149115.9	protein_coding	1282.25	1.26521	0.0820134	15.4269	1.07988e-53	3.85533e-52
B2M	ENSG00000166710.13	protein_coding	9388.74	0.482969	0.0313448	15.4082	1.44104e-53	5.13354e-52
SIK1	ENSG00000142178.7	protein_coding	803.261	1.61128	0.104914	15.3581	3.1283e-53	1.11201e-51
LRRC20	ENSG00000172731.9	protein_coding	336.492	-2.93591	0.191223	-15.3534	3.36302e-53	1.19285e-51
GPRC5B	ENSG00000167191.7	protein_coding	288.694	-3.41252	0.222616	-15.3292	4.87894e-53	1.72681e-51
SEC14L1	ENSG00000129657.10	protein_coding	3924.36	-0.739008	0.0483058	-15.2985	7.81851e-53	2.76125e-51
SCCPDH	ENSG00000143653.9	protein_coding	1076.92	-1.43424	0.093756	-15.2976	7.9347e-53	2.79626e-51
ZBTB38	ENSG00000177311.6	protein_coding	1069.37	1.45374	0.0951126	15.2844	9.71543e-53	3.41645e-51
RP1-261G23.7	ENSG00000272114.1	antisense	492.412	2.23151	0.146045	15.2797	1.04476e-52	3.66606e-51
KDELR1	ENSG00000105438.4	protein_coding	3353.78	0.826437	0.0541131	15.2724	1.16797e-52	4.08963e-51
RPS3	ENSG00000149273.10	protein_coding	12511.8	0.410429	0.026946	15.2316	2.18327e-52	7.62841e-51
SIPA1L1	ENSG00000197555.5	protein_coding	1320.09	1.23724	0.0812816	15.2216	2.54096e-52	8.85931e-51
PFKP	ENSG00000067057.12	protein_coding	3590.47	0.805376	0.052946	15.2113	2.97703e-52	1.03577e-50
EVI2A	ENSG00000126860.7	protein_coding	435.469	-2.41803	0.159147	-15.1937	3.89376e-52	1.35184e-50
CALR	ENSG00000179218.9	protein_coding	24593.5	-0.313717	0.0206996	-15.1557	6.94425e-52	2.40582e-50
LRP10	ENSG00000197324.4	protein_coding	4770.67	0.687685	0.0453782	15.1545	7.07326e-52	2.44535e-50
ADAM9	ENSG00000168615.7	protein_coding	2726.8	0.845261	0.0559856	15.0978	1.67366e-51	5.77395e-50
GADD45B	ENSG00000099860.4	protein_coding	867.322	1.5226	0.100875	15.0939	1.77592e-51	6.11388e-50
ALDH1B1	ENSG00000137124.6	protein_coding	716.667	-1.76384	0.116929	-15.0847	2.04292e-51	7.01829e-50
FADS2	ENSG00000134824.9	protein_coding	3834.49	-0.728752	0.0483655	-15.0676	2.6456e-51	9.06976e-50
RPL35A	ENSG00000182899.10	protein_coding	6642.37	0.548555	0.0364147	15.0641	2.78958e-51	9.54338e-50
PRRC2C	ENSG00000117523.11	protein_coding	3446.4	0.818465	0.0545983	14.9907	8.44945e-51	2.88461e-49
CEP350	ENSG00000135837.11	protein_coding	821.574	1.6392	0.109473	14.9735	1.09342e-50	3.72512e-49
TMEM97	ENSG00000109084.9	protein_coding	832.574	-1.63696	0.109469	-14.9536	1.47564e-50	5.01686e-49
DMBT1	ENSG00000187908.11	protein_coding	178.74	4.43403	0.296948	14.932	2.04019e-50	6.92185e-49
SRPX2	ENSG00000102359.5	protein_coding	276.729	2.8986	0.19426	14.9213	2.3961e-50	8.1126e-49
RPS19	ENSG00000105372.2	protein_coding	7715.59	0.509215	0.0341683	14.9032	3.14334e-50	1.06206e-48
GGCX	ENSG00000115486.7	protein_coding	1740.47	1.0543	0.0708246	14.8861	4.05982e-50	1.36889e-48
TSPAN3	ENSG00000140391.10	protein_coding	2477.58	-0.898703	0.0604042	-14.8781	4.56967e-50	1.53764e-48
RPL32	ENSG00000144713.8	protein_coding	10275.1	0.449883	0.0302938	14.8507	6.88661e-50	2.31252e-48
EBNA1BP2	ENSG00000117395.6	protein_coding	1805.33	-1.04731	0.0705733	-14.84	8.07592e-50	2.70634e-48
FOS	ENSG00000170345.5	protein_coding	330.907	2.63597	0.177629	14.8398	8.10507e-50	2.71057e-48
ATRX	ENSG00000085224.16	protein_coding	1155.42	1.30964	0.0883046	14.831	9.23811e-50	3.08319e-48
GPR68	ENSG00000119714.6	protein_coding	216.068	3.38611	0.228639	14.8099	1.26511e-49	4.21368e-48
GFPT2	ENSG00000131459.8	protein_coding	544.26	1.90453	0.128706	14.7975	1.51929e-49	5.05003e-48
RPS25	ENSG00000118181.6	protein_coding	6557.98	0.590253	0.0399144	14.788	1.75142e-49	5.80983e-48
MCM2	ENSG00000073111.9	protein_coding	474.493	-2.19098	0.148558	-14.7483	3.15622e-49	1.04487e-47
C3	ENSG00000125730.12	protein_coding	174.131	6.07299	0.412067	14.7379	3.68219e-49	1.21653e-47
TINAGL1	ENSG00000142910.11	protein_coding	438.07	-2.31841	0.157317	-14.7372	3.71979e-49	1.22648e-47
TMEM43	ENSG00000170876.7	protein_coding	1688.58	1.04522	0.0710412	14.7129	5.32517e-49	1.75228e-47
NUPR1	ENSG00000176046.7	protein_coding	618.849	-1.86616	0.127058	-14.6875	7.75418e-49	2.54645e-47
EHF	ENSG00000135373.8	protein_coding	619.513	1.79626	0.122454	14.6688	1.02115e-48	3.34671e-47
HSP90AB1	ENSG00000096384.15	protein_coding	27533.5	0.280322	0.0191205	14.6608	1.14933e-48	3.7593e-47
SLC44A2	ENSG00000129353.10	protein_coding	2226.53	-0.941671	0.0643185	-14.6408	1.54352e-48	5.03856e-47
PFKFB4	ENSG00000114268.7	protein_coding	525.234	2.00718	0.137113	14.6388	1.58745e-48	5.17167e-47
CDH4	ENSG00000179242.11	protein_coding	730.93	-1.72334	0.117744	-14.6364	1.64605e-48	5.35195e-47
GLG1	ENSG00000090863.7	protein_coding	1935.49	0.987219	0.067651	14.5928	3.12043e-48	1.01256e-46
IMPDH2	ENSG00000178035.7	protein_coding	2961.56	0.790615	0.0544506	14.5198	9.07122e-48	2.93775e-46
FKBP8	ENSG00000105701.11	protein_coding	4040.98	0.678649	0.0467523	14.5158	9.61741e-48	3.10849e-46
RPS20	ENSG00000008988.5	protein_coding	4778.29	0.61841	0.0426255	14.508	1.07835e-47	3.47852e-46
FLII	ENSG00000177731.11	protein_coding	4413.77	-0.656176	0.045232	-14.5069	1.09559e-47	3.5272e-46
ZHX3	ENSG00000174306.17	protein_coding	1048.97	1.34618	0.0928583	14.4972	1.26225e-47	4.0558e-46
TRIP11	ENSG00000100815.8	protein_coding	1018.54	1.35812	0.0937235	14.4907	1.38689e-47	4.44754e-46
USP34	ENSG00000115464.10	protein_coding	1982.06	1.09411	0.0755882	14.4746	1.75401e-47	5.61387e-46
ATP2B4	ENSG00000058668.10	protein_coding	774.798	1.58709	0.109685	14.4695	1.88775e-47	6.03012e-46
MATN2	ENSG00000132561.9	protein_coding	219.106	-4.46805	0.308862	-14.4662	1.98149e-47	6.31725e-46
SEMA4B	ENSG00000185033.10	protein_coding	693.217	1.61767	0.112049	14.4371	3.02216e-47	9.61635e-46
ITPR1	ENSG00000150995.13	protein_coding	276.527	2.78442	0.193656	14.3782	7.09181e-47	2.2522e-45
PLIN3	ENSG00000105355.4	protein_coding	2145.78	0.933697	0.0650668	14.3498	1.0682e-46	3.38579e-45
CCT5	ENSG00000150753.7	protein_coding	6189.49	-0.574626	0.0400835	-14.3357	1.30871e-46	4.14013e-45
PLD3	ENSG00000105223.14	protein_coding	2801.4	0.791003	0.0552633	14.3134	1.80581e-46	5.70169e-45
UBASH3B	ENSG00000154127.5	protein_coding	790.081	-1.61481	0.112876	-14.306	2.00765e-46	6.32681e-45
CMIP	ENSG00000153815.12	protein_coding	1474.03	-1.15044	0.080495	-14.2921	2.45192e-46	7.71202e-45
ZBED6	ENSG00000257315.1	protein_coding	238.227	2.99722	0.209773	14.2879	2.60391e-46	8.17439e-45
HIST1H2AC	ENSG00000180573.8	protein_coding	737.648	1.62226	0.113798	14.2556	4.13703e-46	1.29624e-44
RPL11	ENSG00000142676.8	protein_coding	10646.7	0.43439	0.0304942	14.245	4.81345e-46	1.50531e-44
CCL20	ENSG00000115009.7	protein_coding	173.98	6.57608	0.462382	14.2222	6.67596e-46	2.08379e-44
C15orf48	ENSG00000166920.6	protein_coding	365.913	2.39584	0.168637	14.2071	8.27795e-46	2.57891e-44
SNAI2	ENSG00000019549.4	protein_coding	1160.92	1.22809	0.0866279	14.1766	1.27871e-45	3.97613e-44
ZNF608	ENSG00000168916.11	protein_coding	336.18	2.40608	0.169816	14.1687	1.43041e-45	4.43943e-44
DUSP14	ENSG00000161326.8	protein_coding	724.632	-1.68845	0.11918	-14.1672	1.46166e-45	4.52785e-44
AP1M2	ENSG00000129354.7	protein_coding	248.886	-3.39968	0.239974	-14.1669	1.46925e-45	4.54276e-44
RPL14	ENSG00000188846.9	protein_coding	8520.76	0.458538	0.0324818	14.1168	2.99365e-45	9.23861e-44
PHGDH	ENSG00000092621.7	protein_coding	713.935	-1.76156	0.124895	-14.1043	3.57529e-45	1.10128e-43
TBC1D4	ENSG00000136111.8	protein_coding	628.104	-1.79317	0.127236	-14.0933	4.17576e-45	1.28383e-43
PAG1	ENSG00000076641.4	protein_coding	482.313	1.99524	0.141769	14.0739	5.49724e-45	1.68695e-43
NR2F2	ENSG00000185551.8	protein_coding	2243.08	0.87698	0.0624581	14.0411	8.73553e-45	2.67568e-43
KDM3A	ENSG00000115548.12	protein_coding	1295.73	1.18224	0.0842107	14.0391	8.98128e-45	2.74583e-43
ID1	ENSG00000125968.7	protein_coding	228.33	3.41614	0.245023	13.9421	3.51363e-44	1.07221e-42
EVI2B	ENSG00000185862.5	protein_coding	476.052	-2.04706	0.146955	-13.9299	4.172e-44	1.27075e-42
GNA15	ENSG00000060558.3	protein_coding	734.469	1.56586	0.112469	13.9226	4.61834e-44	1.40409e-42
KIAA1109	ENSG00000138688.11	protein_coding	968.926	1.39866	0.100601	13.9031	6.0673e-44	1.8412e-42
ABCC3	ENSG00000108846.11	protein_coding	276.096	2.62163	0.188569	13.9027	6.09665e-44	1.84669e-42
HSPA9	ENSG00000113013.8	protein_coding	5803.24	-0.566442	0.0407508	-13.9002	6.32039e-44	1.91093e-42
ILF3	ENSG00000129351.13	protein_coding	4479.37	-0.62639	0.0450974	-13.8897	7.31253e-44	2.20682e-42
ZNF114	ENSG00000178150.4	protein_coding	329.141	-2.61471	0.188324	-13.8841	7.91119e-44	2.3831e-42
B3GNT5	ENSG00000176597.7	protein_coding	479.272	1.93414	0.139322	13.8825	8.08179e-44	2.43002e-42
PABPC4	ENSG00000090621.9	protein_coding	3325.59	0.736459	0.0530515	13.8819	8.14991e-44	2.44602e-42
MXI1	ENSG00000119950.16	protein_coding	930.839	1.39694	0.100845	13.8523	1.23218e-43	3.69135e-42
HSPA8	ENSG00000109971.9	protein_coding	28111.7	0.266694	0.019266	13.8427	1.40795e-43	4.21024e-42
LNPEP	ENSG00000113441.11	protein_coding	695.921	1.64745	0.119067	13.8364	1.538e-43	4.59074e-42
ARRDC2	ENSG00000105643.5	protein_coding	777.004	1.5323	0.110776	13.8325	1.62282e-43	4.83512e-42
RPL35	ENSG00000136942.10	protein_coding	7526.51	0.488675	0.0353947	13.8065	2.33002e-43	6.92959e-42
SPAG4	ENSG00000061656.5	protein_coding	161.013	4.10977	0.297823	13.7993	2.57188e-43	7.63503e-42
BCL6	ENSG00000113916.13	protein_coding	883.708	1.45193	0.105408	13.7744	3.6323e-43	1.07636e-41
BMP2	ENSG00000125845.6	protein_coding	223.302	2.96056	0.21499	13.7707	3.82429e-43	1.1312e-41
COMMD7	ENSG00000149600.7	protein_coding	1029.35	-1.32688	0.0963996	-13.7644	4.17222e-43	1.2319e-41
PKP2	ENSG00000057294.9	protein_coding	885.423	1.40564	0.1022	13.7539	4.82696e-43	1.42265e-41
PLA2G16	ENSG00000176485.6	protein_coding	1144.23	-1.23879	0.0902409	-13.7276	6.94113e-43	2.04209e-41
ACADVL	ENSG00000072778.15	protein_coding	1385.53	1.09869	0.0802388	13.6927	1.12201e-42	3.29504e-41
RP11-841O20.2	ENSG00000258757.1	antisense	1018	1.26622	0.0924915	13.6902	1.1626e-42	3.40814e-41
WDR60	ENSG00000126870.11	protein_coding	676.183	1.61293	0.11789	13.6816	1.30793e-42	3.82733e-41
RPL38	ENSG00000172809.8	protein_coding	4240.79	0.62775	0.0458851	13.6809	1.32071e-42	3.85784e-41
UBE2E1	ENSG00000170142.7	protein_coding	2452.25	0.807049	0.0590713	13.6623	1.70569e-42	4.97352e-41
PITPNM3	ENSG00000091622.11	protein_coding	378.313	-2.3081	0.168961	-13.6606	1.74583e-42	5.08152e-41
KCNN4	ENSG00000104783.7	protein_coding	398.389	2.10619	0.154235	13.6557	1.86618e-42	5.41275e-41
PLEKHA7	ENSG00000166689.10	protein_coding	548.363	-1.82058	0.13332	-13.6557	1.86624e-42	5.41275e-41
TNRC6B	ENSG00000100354.16	protein_coding	467.807	1.99738	0.146427	13.6407	2.2928e-42	6.63818e-41
DNAH5	ENSG00000039139.9	protein_coding	199.253	3.20105	0.234797	13.6333	2.53942e-42	7.33925e-41
RPL27A	ENSG00000166441.8	protein_coding	9351.3	0.421575	0.0309239	13.6327	2.5605e-42	7.38713e-41
ATP6V0D2	ENSG00000147614.3	protein_coding	274.671	-2.91862	0.214169	-13.6277	2.7427e-42	7.89887e-41
VDAC1	ENSG00000213585.6	protein_coding	5246.35	0.588845	0.0432794	13.6057	3.70567e-42	1.06535e-40
RPL30	ENSG00000156482.6	protein_coding	9596.83	0.439312	0.0322982	13.6018	3.90897e-42	1.12183e-40
RPL37A	ENSG00000197756.5	protein_coding	6608.99	0.56135	0.0412879	13.596	4.22961e-42	1.21172e-40
RP11-753H16.5	ENSG00000258086.1	antisense	147.094	4.35656	0.320816	13.5796	5.28973e-42	1.51279e-40
ELL2	ENSG00000118985.10	protein_coding	1823.95	0.954867	0.0703181	13.5793	5.31615e-42	1.5177e-40
HECTD1	ENSG00000092148.8	protein_coding	2969.88	0.730064	0.0537862	13.5735	5.75375e-42	1.63977e-40
LSS	ENSG00000160285.10	protein_coding	1588.9	-1.02155	0.0753078	-13.565	6.45467e-42	1.83633e-40
DTL	ENSG00000143476.13	protein_coding	305.795	-2.60749	0.192318	-13.5582	7.08375e-42	2.01181e-40
MCM5	ENSG00000100297.11	protein_coding	525.744	-1.88902	0.139354	-13.5556	7.34283e-42	2.08178e-40
RASD1	ENSG00000108551.4	protein_coding	938.272	1.31096	0.0967322	13.5524	7.66424e-42	2.16915e-40
RANBP2	ENSG00000153201.11	protein_coding	1045.67	1.25956	0.0929783	13.5468	8.27784e-42	2.33877e-40
DENND4C	ENSG00000137145.16	protein_coding	538.761	1.72843	0.127593	13.5465	8.30985e-42	2.34378e-40
SEPW1	ENSG00000178980.10	protein_coding	349.594	2.27776	0.168279	13.5356	9.63743e-42	2.71355e-40
RPS27	ENSG00000177954.7	protein_coding	6305.86	0.509241	0.0376408	13.529	1.05471e-41	2.96459e-40
SSBP2	ENSG00000145687.11	protein_coding	262.041	2.59737	0.192006	13.5276	1.07533e-41	3.01738e-40
KMT2C	ENSG00000055609.13	protein_coding	833.334	1.49761	0.110761	13.5211	1.17357e-41	3.2874e-40
EGFR	ENSG00000146648.11	protein_coding	3802.54	-0.654862	0.048484	-13.5068	1.42644e-41	3.98891e-40
SLC20A2	ENSG00000168575.5	protein_coding	405.66	-2.17763	0.161551	-13.4795	2.06504e-41	5.76488e-40
LGALS8	ENSG00000116977.14	protein_coding	2562.15	-0.816252	0.0605822	-13.4735	2.241e-41	6.24545e-40
BCL9L	ENSG00000186174.8	protein_coding	2229.86	0.888814	0.0659954	13.4678	2.4188e-41	6.72952e-40
ARL6IP5	ENSG00000144746.6	protein_coding	1622.95	1.03125	0.0767449	13.4374	3.65178e-41	1.01427e-39
FDFT1	ENSG00000079459.8	protein_coding	1554.47	-1.03868	0.0773226	-13.4331	3.86722e-41	1.07229e-39
GALNT2	ENSG00000143641.8	protein_coding	1112.2	1.19305	0.088958	13.4114	5.18449e-41	1.4351e-39
OS9	ENSG00000135506.11	protein_coding	2797.4	0.796122	0.0594134	13.3997	6.07197e-41	1.67793e-39
STMN1	ENSG00000117632.16	protein_coding	4533.51	-0.59639	0.0445696	-13.3811	7.7997e-41	2.15175e-39
BDP1	ENSG00000145734.14	protein_coding	727.135	1.60045	0.119882	13.3501	1.18239e-40	3.25643e-39
E2F1	ENSG00000101412.9	protein_coding	296.389	-2.77772	0.208452	-13.3255	1.64528e-40	4.5237e-39
H2AFZ	ENSG00000164032.7	protein_coding	3667.18	-0.665333	0.0499398	-13.3227	1.70852e-40	4.68971e-39
SAA2	ENSG00000134339.4	protein_coding	155.199	6.9438	0.521638	13.3115	1.98345e-40	5.43524e-39
YEATS2	ENSG00000163872.11	protein_coding	719.815	1.47715	0.111173	13.2869	2.75588e-40	7.53934e-39
SLC19A1	ENSG00000173638.14	protein_coding	350.467	2.15019	0.162003	13.2726	3.34004e-40	9.12221e-39
RAI14	ENSG00000039560.9	protein_coding	2371.3	0.80238	0.0605087	13.2606	3.91941e-40	1.06868e-38
RFTN1	ENSG00000131378.9	protein_coding	934.606	-1.36914	0.103266	-13.2584	4.03373e-40	1.09802e-38
FAM162A	ENSG00000114023.11	protein_coding	585.665	1.64934	0.124407	13.2576	4.07649e-40	1.10782e-38
ZDHHC9	ENSG00000188706.8	protein_coding	1100.01	1.17439	0.0886567	13.2465	4.72837e-40	1.28284e-38
HSPA1A	ENSG00000204389.8	protein_coding	740.363	1.61605	0.122378	13.2054	8.16541e-40	2.21168e-38
HEG1	ENSG00000173706.8	protein_coding	2402.3	-0.842857	0.0638509	-13.2004	8.72862e-40	2.36033e-38
SHC1	ENSG00000160691.14	protein_coding	1887.99	0.883419	0.0669466	13.1959	9.26571e-40	2.50144e-38
GPR116	ENSG00000069122.14	protein_coding	1928.12	-0.92441	0.0700562	-13.1953	9.34356e-40	2.5183e-38
PJA2	ENSG00000198961.5	protein_coding	2032.28	0.890828	0.067555	13.1867	1.04657e-39	2.81612e-38
MET	ENSG00000105976.10	protein_coding	1872.78	-0.907372	0.0688413	-13.1806	1.13419e-39	3.04688e-38
KB-1208A12.3	ENSG00000245970.2	antisense	5251.62	0.536763	0.0407325	13.1778	1.17853e-39	3.1608e-38
CAP2	ENSG00000112186.7	protein_coding	446.427	-1.99969	0.151916	-13.1631	1.43049e-39	3.83031e-38
MFN2	ENSG00000116688.12	protein_coding	1636.87	-0.984653	0.0749315	-13.1407	1.92421e-39	5.14388e-38
SKA2	ENSG00000182628.8	protein_coding	624.282	-1.66237	0.126654	-13.1253	2.35954e-39	6.29735e-38
RELN	ENSG00000189056.9	protein_coding	178.488	-5.20498	0.396826	-13.1165	2.64801e-39	7.05577e-38
FAM213A	ENSG00000122378.9	protein_coding	913.832	-1.31074	0.099971	-13.1112	2.83883e-39	7.55194e-38
NCSTN	ENSG00000162736.11	protein_coding	2865.38	0.773543	0.059014	13.1078	2.97152e-39	7.89212e-38
TNFRSF1A	ENSG00000067182.3	protein_coding	2052.82	0.850337	0.0649898	13.0842	4.0565e-39	1.07563e-37
GDI1	ENSG00000203879.7	protein_coding	2215.06	0.834187	0.0638318	13.0685	4.98216e-39	1.31894e-37
HSP90AA1	ENSG00000080824.14	protein_coding	21229.7	-0.280151	0.0214646	-13.0518	6.20891e-39	1.64106e-37
RPS11	ENSG00000142534.2	protein_coding	10970.6	0.37534	0.0288351	13.0168	9.81935e-39	2.59114e-37
USP9X	ENSG00000124486.8	protein_coding	3115.04	0.689159	0.0529875	13.0061	1.13008e-38	2.97726e-37
PGD	ENSG00000142657.16	protein_coding	2367.67	-0.798055	0.0613687	-13.0043	1.157e-38	3.0433e-37
SLC9A3R2	ENSG00000065054.9	protein_coding	2117.35	0.852905	0.0657375	12.9744	1.70917e-38	4.4885e-37
F2RL1	ENSG00000164251.4	protein_coding	2953.08	0.732078	0.0564629	12.9657	1.91592e-38	5.0234e-37
CYTH4	ENSG00000100055.16	protein_coding	129.404	4.32259	0.33353	12.9601	2.05921e-38	5.39047e-37
KLHL4	ENSG00000102271.9	protein_coding	610.484	1.61494	0.124626	12.9582	2.11066e-38	5.51633e-37
RAB11B	ENSG00000185236.7	protein_coding	2435.96	0.76938	0.0594888	12.9332	2.92399e-38	7.62985e-37
ITPK1	ENSG00000100605.12	protein_coding	1398.6	-1.16061	0.0898027	-12.924	3.29488e-38	8.57625e-37
ALDOC	ENSG00000109107.9	protein_coding	461.224	1.80456	0.139629	12.924	3.29715e-38	8.57625e-37
IFNGR2	ENSG00000159128.10	protein_coding	1132.38	1.12937	0.0874312	12.9172	3.59924e-38	9.34717e-37
ATP2B1	ENSG00000070961.10	protein_coding	3381.24	0.653619	0.0506281	12.9102	3.94275e-38	1.02231e-36
EFEMP1	ENSG00000115380.14	protein_coding	361.783	-2.27229	0.176043	-12.9076	4.07934e-38	1.05605e-36
PSG5	ENSG00000204941.9	protein_coding	185.975	-6.00991	0.466497	-12.8831	5.60511e-38	1.44875e-36
BCAR3	ENSG00000137936.12	protein_coding	1956.17	0.890413	0.0691536	12.8759	6.15494e-38	1.58836e-36
FBP1	ENSG00000165140.5	protein_coding	208.435	-3.40231	0.264438	-12.8662	6.97605e-38	1.79743e-36
COL6A2	ENSG00000142173.10	protein_coding	171.415	3.2837	0.255259	12.8642	7.1571e-38	1.84118e-36
CTSC	ENSG00000109861.11	protein_coding	1823.12	-0.913327	0.0710301	-12.8583	7.725e-38	1.98416e-36
AK5	ENSG00000154027.14	protein_coding	336.127	-2.33796	0.181956	-12.8491	8.70475e-38	2.23231e-36
INHBB	ENSG00000163083.5	protein_coding	333.585	-2.30757	0.179771	-12.8362	1.02862e-37	2.63374e-36
YARS	ENSG00000134684.6	protein_coding	3122.43	-0.696666	0.0542748	-12.8359	1.03177e-37	2.6377e-36
GPR64	ENSG00000173698.13	protein_coding	127.424	4.23882	0.330305	12.833	1.07068e-37	2.7329e-36
PSG4	ENSG00000243137.3	protein_coding	169.252	-5.23585	0.408722	-12.8103	1.43568e-37	3.65885e-36
SERPINH1	ENSG00000149257.9	protein_coding	1985.62	0.858734	0.0670506	12.8073	1.49333e-37	3.79988e-36
RSF1	ENSG00000048649.9	protein_coding	976.225	1.32564	0.103548	12.8021	1.5958e-37	4.05432e-36
CDA	ENSG00000158825.5	protein_coding	797.094	-1.43541	0.112174	-12.7964	1.71822e-37	4.3586e-36
RASSF4	ENSG00000107551.16	protein_coding	327.299	2.14912	0.168013	12.7914	1.83252e-37	4.64134e-36
TNPO1	ENSG00000083312.13	protein_coding	2524.69	0.820725	0.0641666	12.7905	1.85209e-37	4.68366e-36
LONP1	ENSG00000196365.7	protein_coding	1774.01	-0.957945	0.0749742	-12.777	2.20418e-37	5.56547e-36
CNNM2	ENSG00000148842.13	protein_coding	1326.58	-1.11276	0.0871301	-12.7713	2.37257e-37	5.98142e-36
TPR	ENSG00000047410.9	protein_coding	2683.32	0.72922	0.057184	12.7522	3.0323e-37	7.63291e-36
NT5E	ENSG00000135318.7	protein_coding	5563.99	0.554398	0.0434889	12.748	3.19722e-37	8.03571e-36
UBXN7	ENSG00000163960.7	protein_coding	907.754	1.25634	0.0986241	12.7387	3.6026e-37	9.0407e-36
C6orf132	ENSG00000188112.4	protein_coding	844.99	-1.3343	0.104746	-12.7384	3.61821e-37	9.066e-36
SCD	ENSG00000099194.5	protein_coding	11905.9	-0.361538	0.0283907	-12.7344	3.80891e-37	9.52926e-36
HNRNPA3	ENSG00000170144.14	protein_coding	2146.09	-0.819007	0.0643191	-12.7335	3.85188e-37	9.62206e-36
EIF4A2	ENSG00000156976.10	protein_coding	4684.4	0.600554	0.0471817	12.7285	4.10479e-37	1.02382e-35
PRICKLE3	ENSG00000012211.8	protein_coding	2011.53	0.829315	0.06518	12.7235	4.38007e-37	1.09005e-35
TMEM165	ENSG00000134851.8	protein_coding	1472.07	0.971717	0.0763724	12.7234	4.38363e-37	1.09005e-35
MAGED1	ENSG00000179222.13	protein_coding	1325.81	1.03906	0.0818773	12.6905	6.67869e-37	1.65824e-35
ALCAM	ENSG00000170017.8	protein_coding	2875.81	-0.705424	0.055717	-12.6608	9.74438e-37	2.41575e-35
RPL36	ENSG00000130255.8	protein_coding	5470.34	0.52528	0.0415216	12.6508	1.10768e-36	2.74193e-35
EPS8L2	ENSG00000177106.10	protein_coding	1120.64	-1.15569	0.0914514	-12.6372	1.31579e-36	3.25216e-35
SPTBN1	ENSG00000115306.11	protein_coding	5214.33	-0.543399	0.0430574	-12.6203	1.63116e-36	4.02557e-35
LAMC1	ENSG00000135862.5	protein_coding	3811.14	0.644396	0.0511726	12.5926	2.31971e-36	5.71626e-35
EIF3A	ENSG00000107581.8	protein_coding	7184.85	0.440192	0.03498	12.5841	2.58302e-36	6.35556e-35
RAB31	ENSG00000168461.8	protein_coding	1247.61	1.03956	0.0827947	12.5559	3.69082e-36	9.06769e-35
LINC00261	ENSG00000259974.2	lincRNA	599.649	-1.57027	0.125415	-12.5207	5.75507e-36	1.4118e-34
RPLP2	ENSG00000177600.4	protein_coding	4983.32	0.533813	0.042653	12.5153	6.16096e-36	1.50911e-34
STX3	ENSG00000166900.10	protein_coding	1245.14	-1.12284	0.0897592	-12.5095	6.62478e-36	1.6203e-34
SAV1	ENSG00000151748.10	protein_coding	1359.62	-1.01667	0.0813771	-12.4933	8.12365e-36	1.98394e-34
HLA-DRB1	ENSG00000196126.6	protein_coding	115.834	4.62373	0.370788	12.47	1.0881e-35	2.65337e-34
PITPNC1	ENSG00000154217.10	protein_coding	567.641	1.56016	0.125331	12.4483	1.42773e-35	3.47641e-34
ZNF704	ENSG00000164684.9	protein_coding	221.946	-2.89081	0.232352	-12.4415	1.55477e-35	3.78012e-34
CMTM7	ENSG00000153551.9	protein_coding	1015.07	-1.17292	0.0945008	-12.4118	2.25522e-35	5.47501e-34
CCRL2	ENSG00000121797.9	protein_coding	434.968	-1.98799	0.160293	-12.4022	2.54236e-35	6.16297e-34
MGEA5	ENSG00000198408.9	protein_coding	1177.21	1.12123	0.0904355	12.3982	2.67367e-35	6.4717e-34
GARS	ENSG00000106105.9	protein_coding	4461.64	-0.550555	0.0444168	-12.3952	2.77446e-35	6.70575e-34
IRX3	ENSG00000177508.11	protein_coding	210.575	2.66607	0.215099	12.3946	2.79546e-35	6.74657e-34
SEL1L	ENSG00000071537.9	protein_coding	1970.12	0.833697	0.0673325	12.3818	3.27911e-35	7.90216e-34
PINK1-AS	ENSG00000117242.7	antisense	1244.36	-1.05316	0.0851305	-12.3711	3.74801e-35	9.0189e-34
STK38L	ENSG00000211455.3	protein_coding	526.847	1.58447	0.128105	12.3686	3.86707e-35	9.29175e-34
RPL24	ENSG00000114391.8	protein_coding	6044.25	0.473615	0.0383024	12.3652	4.03404e-35	9.67874e-34
FOXM1	ENSG00000111206.8	protein_coding	606.158	-1.56123	0.126396	-12.3519	4.75927e-35	1.14021e-33
HABP4	ENSG00000130956.9	protein_coding	569.577	-1.59392	0.129153	-12.3413	5.42447e-35	1.29768e-33
BDNF	ENSG00000176697.14	protein_coding	328.102	-2.18867	0.17737	-12.3396	5.54347e-35	1.32421e-33
ZNF292	ENSG00000188994.8	protein_coding	411.32	1.88521	0.152807	12.3372	5.70968e-35	1.36193e-33
NR3C2	ENSG00000151623.10	protein_coding	329.485	-2.1758	0.176414	-12.3335	5.97696e-35	1.42361e-33
PTK2	ENSG00000169398.15	protein_coding	3386.38	0.622274	0.0504572	12.3327	6.03942e-35	1.4364e-33
BPTF	ENSG00000171634.12	protein_coding	1256.91	1.04135	0.0844528	12.3305	6.20494e-35	1.47363e-33
TNS3	ENSG00000136205.12	protein_coding	1519.13	0.948285	0.0769684	12.3204	7.03115e-35	1.66743e-33
TMEM131	ENSG00000075568.12	protein_coding	1615.39	0.907679	0.0737995	12.2992	9.14204e-35	2.16489e-33
DAP	ENSG00000112977.11	protein_coding	4588.71	-0.574329	0.0467232	-12.2922	9.97826e-35	2.35951e-33
CYB5B	ENSG00000103018.12	protein_coding	1281.68	-1.07415	0.0873939	-12.291	1.01301e-34	2.39196e-33
MLF1IP	ENSG00000151725.7	protein_coding	345.791	-2.21179	0.180102	-12.2808	1.14871e-34	2.70848e-33
MFI2	ENSG00000163975.7	protein_coding	913.169	1.19097	0.0973047	12.2396	1.91004e-34	4.4971e-33
BHLHE40-AS1	ENSG00000235831.2	antisense	180.969	2.96447	0.242434	12.2279	2.20466e-34	5.18333e-33
RPL7	ENSG00000147604.9	protein_coding	7809.87	0.423665	0.0347239	12.201	3.07094e-34	7.20966e-33
RPS5	ENSG00000083845.4	protein_coding	5655.42	0.484731	0.0398596	12.161	5.01657e-34	1.17606e-32
RP11-323N12.5	ENSG00000267601.1	antisense	1387.32	-1.00427	0.082652	-12.1506	5.69307e-34	1.33275e-32
RPS12	ENSG00000112306.7	protein_coding	7999.84	0.405215	0.0333808	12.1392	6.55008e-34	1.53119e-32
UHRF1	ENSG00000034063.9	processed_transcript	346.478	-2.09082	0.172353	-12.1311	7.23071e-34	1.68789e-32
MITF	ENSG00000187098.10	protein_coding	362.852	-2.01997	0.166549	-12.1284	7.47229e-34	1.7418e-32
SLC25A37	ENSG00000147454.9	protein_coding	817.288	1.23914	0.102205	12.1241	7.87527e-34	1.83313e-32
LDB3	ENSG00000122367.15	protein_coding	111.371	6.49593	0.535935	12.1207	8.20092e-34	1.90622e-32
ITGB2	ENSG00000160255.12	protein_coding	649.867	-1.44406	0.119148	-12.1199	8.28431e-34	1.92288e-32
RP11-149I23.3	ENSG00000232110.3	antisense	145.696	-4.40965	0.364276	-12.1053	9.90621e-34	2.29608e-32
MIDN	ENSG00000167470.8	protein_coding	554.955	1.5642	0.129289	12.0985	1.07564e-33	2.48962e-32
PGM5	ENSG00000154330.8	protein_coding	399.75	-1.97007	0.16308	-12.0804	1.34031e-33	3.09784e-32
C10orf54	ENSG00000107738.15	protein_coding	167.246	-3.50009	0.290271	-12.058	1.75984e-33	4.06176e-32
PLEK2	ENSG00000100558.4	protein_coding	665.664	1.39208	0.115596	12.0426	2.12034e-33	4.88692e-32
NEDD4L	ENSG00000049759.12	protein_coding	1934.55	-0.890673	0.0739617	-12.0424	2.12794e-33	4.89756e-32
AP2B1	ENSG00000006125.12	protein_coding	5987.55	0.468285	0.0388939	12.0401	2.18779e-33	5.02823e-32
FAM107B	ENSG00000065809.9	protein_coding	1613.33	-0.899327	0.0747844	-12.0256	2.60701e-33	5.98334e-32
ABCA1	ENSG00000165029.11	protein_coding	260.531	2.5869	0.215135	12.0246	2.64015e-33	6.05092e-32
ARNT2	ENSG00000172379.14	protein_coding	392.034	-1.92739	0.160361	-12.0191	2.82161e-33	6.45778e-32
GADD45A	ENSG00000116717.7	protein_coding	891.321	1.1882	0.0989109	12.0129	3.04081e-33	6.94976e-32
TMPO	ENSG00000120802.9	protein_coding	1232.08	-1.10247	0.0919498	-11.9899	4.01368e-33	9.16046e-32
HDAC9	ENSG00000048052.17	protein_coding	488.997	-1.70881	0.142587	-11.9843	4.29592e-33	9.791e-32
CLCN7	ENSG00000103249.13	protein_coding	822.424	-1.28637	0.107349	-11.983	4.36028e-33	9.92387e-32
BNIP3P1	ENSG00000197358.8	pseudogene	494.12	1.61901	0.135252	11.9703	5.08218e-33	1.15508e-31
C5orf45	ENSG00000161010.10	protein_coding	4111.79	-0.552626	0.0462624	-11.9455	6.85614e-33	1.55612e-31
RP11-488P3.1	ENSG00000230439.2	sense_intronic	99.9395	4.87741	0.408579	11.9375	7.54556e-33	1.71022e-31
SLC39A14	ENSG00000104635.9	protein_coding	1474.89	-0.955004	0.0800596	-11.9287	8.39095e-33	1.89921e-31
FGFRL1	ENSG00000127418.10	protein_coding	986.099	1.16657	0.0978458	11.9225	9.03052e-33	2.04115e-31
SLC1A5	ENSG00000105281.8	protein_coding	3712.76	-0.599232	0.0502778	-11.9184	9.48804e-33	2.1416e-31
WHSC1	ENSG00000109685.13	protein_coding	1137.89	-1.05654	0.0887006	-11.9113	1.03391e-32	2.33048e-31
PFKL	ENSG00000141959.12	protein_coding	1557.83	0.892275	0.0749711	11.9016	1.16116e-32	2.61372e-31
UBA52	ENSG00000221983.3	protein_coding	8514.33	0.388332	0.0326522	11.893	1.28683e-32	2.89264e-31
LAMB1	ENSG00000091136.9	protein_coding	344.783	1.919	0.161809	11.8596	1.91818e-32	4.30593e-31
GRINA	ENSG00000178719.12	protein_coding	5204.94	0.502312	0.0423852	11.8511	2.12339e-32	4.76006e-31
SQRDL	ENSG00000137767.9	protein_coding	560.189	1.48101	0.125126	11.8362	2.53769e-32	5.68102e-31
FSTL1	ENSG00000163430.5	protein_coding	1739.93	-0.862766	0.0729134	-11.8327	2.64339e-32	5.90959e-31
WDR34	ENSG00000119333.7	protein_coding	374.96	-1.9517	0.165072	-11.8233	2.95657e-32	6.60073e-31
HS3ST1	ENSG00000002587.5	protein_coding	171.46	-3.26616	0.276502	-11.8124	3.36697e-32	7.50674e-31
BUB1	ENSG00000169679.10	protein_coding	441.7	-1.7539	0.148515	-11.8096	3.48397e-32	7.75704e-31
ITGAV	ENSG00000138448.7	protein_coding	762.221	1.25824	0.106558	11.8081	3.54579e-32	7.88397e-31
RPS28	ENSG00000233927.4	protein_coding	3466.36	0.592361	0.0501948	11.8013	3.84539e-32	8.53853e-31
TK1	ENSG00000167900.7	protein_coding	341.597	-2.04566	0.173666	-11.7793	4.99266e-32	1.1071e-30
RPL34	ENSG00000109475.12	protein_coding	5239.74	0.5361	0.0455293	11.7748	5.26193e-32	1.16523e-30
RTN4RL2	ENSG00000186907.3	protein_coding	249.321	2.29366	0.195725	11.7188	1.02063e-31	2.25708e-30
CABLES1	ENSG00000134508.8	protein_coding	287.116	-2.31243	0.197333	-11.7184	1.02564e-31	2.26512e-30
SERTAD4	ENSG00000082497.7	protein_coding	135.971	-5.15707	0.440216	-11.7149	1.06955e-31	2.35892e-30
PPP1R15A	ENSG00000087074.7	protein_coding	4471.18	-0.527298	0.0450786	-11.6973	1.31582e-31	2.89816e-30
SH2D5	ENSG00000189410.7	protein_coding	143.974	-3.89475	0.333408	-11.6817	1.5819e-31	3.47955e-30
EXOSC9	ENSG00000123737.8	protein_coding	547.889	-1.55903	0.133473	-11.6805	1.60404e-31	3.52351e-30
GIPC1	ENSG00000123159.11	protein_coding	1549.19	-0.897663	0.0768848	-11.6754	1.70198e-31	3.73365e-30
ELF4	ENSG00000102034.12	protein_coding	1035.63	-1.14223	0.0978999	-11.6674	1.87144e-31	4.0999e-30
SERPINB6	ENSG00000124570.13	protein_coding	2150.3	0.775833	0.0665227	11.6627	1.97738e-31	4.32622e-30
LINC00657	ENSG00000260032.1	lincRNA	4824.32	0.507754	0.0436213	11.6401	2.57842e-31	5.63368e-30
MYCT1	ENSG00000120279.6	protein_coding	149.43	-3.65559	0.314478	-11.6243	3.10028e-31	6.76489e-30
MGLL	ENSG00000074416.9	protein_coding	1345.59	-0.982431	0.0847126	-11.5972	4.25672e-31	9.27592e-30
RPSA	ENSG00000168028.9	protein_coding	7662.65	0.391796	0.0338117	11.5876	4.76427e-31	1.03681e-29
PHC3	ENSG00000173889.11	protein_coding	431.674	1.71436	0.148004	11.5832	5.01371e-31	1.08965e-29
UBR2	ENSG00000024048.6	protein_coding	1281.62	0.965385	0.083372	11.5792	5.25073e-31	1.13965e-29
RP11-498C9.2	ENSG00000262831.1	antisense	2668.52	0.652868	0.0563938	11.5769	5.39324e-31	1.16904e-29
NR1D1	ENSG00000126368.5	protein_coding	489.881	1.63469	0.141237	11.5741	5.57302e-31	1.20641e-29
NEAT1	ENSG00000245532.4	lincRNA	1023.8	-1.09007	0.0942067	-11.571	5.77732e-31	1.24898e-29
RCAN1	ENSG00000159200.13	protein_coding	724.36	-1.39228	0.120427	-11.5613	6.47423e-31	1.3978e-29
GPR153	ENSG00000158292.6	protein_coding	300.26	2.01562	0.174352	11.5607	6.52062e-31	1.40597e-29
HIST1H2BD	ENSG00000158373.7	protein_coding	479.666	1.57271	0.136067	11.5583	6.70082e-31	1.44292e-29
HS3ST3B1	ENSG00000125430.4	protein_coding	410.322	1.68341	0.145813	11.545	7.82082e-31	1.68189e-29
SERPINE2	ENSG00000135919.8	protein_coding	1787.93	0.803753	0.0696293	11.5433	7.97994e-31	1.71386e-29
KIAA0368	ENSG00000136813.10	protein_coding	2204.22	0.735674	0.0638334	11.5249	9.88128e-31	2.11943e-29
KLF7	ENSG00000118263.10	protein_coding	214.213	2.54782	0.2212	11.5182	1.06821e-30	2.2882e-29
NDUFS5	ENSG00000168653.6	protein_coding	2273.63	0.734374	0.0638503	11.5015	1.29641e-30	2.77341e-29
SLC38A2	ENSG00000134294.9	protein_coding	8390.52	0.378295	0.0329312	11.4874	1.52596e-30	3.26023e-29
TRPS1	ENSG00000104447.7	protein_coding	470.863	1.58855	0.13832	11.4847	1.57523e-30	3.36111e-29
MT-CO3	ENSG00000198938.2	protein_coding	64048.6	0.18805	0.016387	11.4755	1.75074e-30	3.73075e-29
HMGCR	ENSG00000113161.11	protein_coding	1411.53	-0.923365	0.0804976	-11.4707	1.85123e-30	3.93974e-29
CHAF1A	ENSG00000167670.11	protein_coding	371.341	-1.85156	0.161533	-11.4624	2.03699e-30	4.32947e-29
EFNA5	ENSG00000184349.8	protein_coding	624.696	1.33932	0.116873	11.4596	2.1045e-30	4.46715e-29
DIAPH2	ENSG00000147202.13	protein_coding	515.979	1.54053	0.134448	11.4582	2.13919e-30	4.53491e-29
FAM129A	ENSG00000135842.12	protein_coding	790.056	-1.30282	0.113838	-11.4446	2.50272e-30	5.29871e-29
ICMT	ENSG00000116237.11	protein_coding	1461.38	-0.89815	0.078549	-11.4343	2.8191e-30	5.96085e-29
GALNT5	ENSG00000136542.4	protein_coding	537.575	-1.53396	0.134177	-11.4324	2.88074e-30	6.08333e-29
ANKH	ENSG00000154122.8	protein_coding	993.213	1.05165	0.0921272	11.4152	3.51129e-30	7.40534e-29
KCNQ5	ENSG00000185760.11	protein_coding	289.173	-2.32332	0.203609	-11.4107	3.69633e-30	7.78558e-29
AKAP9	ENSG00000127914.12	protein_coding	546.78	1.44159	0.126345	11.4099	3.73193e-30	7.85046e-29
ENOSF1	ENSG00000132199.14	protein_coding	373.855	-1.86989	0.163977	-11.4034	4.02279e-30	8.45147e-29
HK2	ENSG00000159399.5	protein_coding	2856.32	0.639112	0.0560803	11.3964	4.3587e-30	9.14546e-29
RPL41	ENSG00000229117.4	protein_coding	6406.05	0.424111	0.0372885	11.3738	5.64782e-30	1.18351e-28
VAC14	ENSG00000103043.10	protein_coding	1637.68	-0.842145	0.0741062	-11.364	6.3157e-30	1.32178e-28
BUB3	ENSG00000154473.13	protein_coding	2368.14	-0.727636	0.0640344	-11.3632	6.37665e-30	1.33283e-28
OSBPL5	ENSG00000021762.15	protein_coding	243.479	2.1847	0.192749	11.3344	8.8596e-30	1.84946e-28
AC010761.8	ENSG00000264577.1	antisense	5399.9	0.464817	0.041029	11.329	9.42966e-30	1.96595e-28
CHI3L2	ENSG00000064886.9	protein_coding	90.9783	6.44981	0.569519	11.325	9.86804e-30	2.05473e-28
PTPN14	ENSG00000152104.7	protein_coding	1550.89	0.843933	0.0745417	11.3216	1.02561e-29	2.13283e-28
2001-03-01	ENSG00000145416.9	protein_coding	131.368	-4.10216	0.362356	-11.3208	1.03523e-29	2.1501e-28
PHF21A	ENSG00000135365.11	protein_coding	491.434	1.53982	0.136047	11.3183	1.06568e-29	2.21054e-28
GLTSCR2	ENSG00000105373.14	protein_coding	1403.51	0.920019	0.0813659	11.3072	1.20922e-29	2.50512e-28
SOGA2	ENSG00000168502.13	protein_coding	561.036	-1.4575	0.12894	-11.3038	1.25721e-29	2.60125e-28
RAP1GAP2	ENSG00000132359.9	protein_coding	146.151	3.12023	0.276257	11.2947	1.39404e-29	2.88073e-28
MICB	ENSG00000204516.5	protein_coding	880.563	-1.19934	0.106253	-11.2876	1.51106e-29	3.1186e-28
KIFC3	ENSG00000140859.11	protein_coding	1899.84	-0.769389	0.0681902	-11.283	1.59259e-29	3.28275e-28
TSPAN8	ENSG00000127324.4	protein_coding	123.117	-4.66891	0.413884	-11.2807	1.63426e-29	3.3644e-28
BIRC6	ENSG00000115760.9	protein_coding	949.011	1.12306	0.0996248	11.2729	1.78536e-29	3.67086e-28
SLC6A8	ENSG00000130821.11	protein_coding	206.314	2.42177	0.215018	11.2631	1.99682e-29	4.1005e-28
PANX1	ENSG00000110218.4	protein_coding	667.156	1.31078	0.116412	11.2598	2.07303e-29	4.25166e-28
SH3BP2	ENSG00000087266.11	protein_coding	684.602	1.34724	0.119689	11.2562	2.15827e-29	4.42095e-28
MELK	ENSG00000165304.3	protein_coding	460.093	-1.68018	0.149353	-11.2497	2.32308e-29	4.75261e-28
ATP6V0D1	ENSG00000159720.7	protein_coding	1506.67	-0.920057	0.0818813	-11.2365	2.69971e-29	5.51622e-28
NCEH1	ENSG00000144959.5	protein_coding	1007.76	-1.08367	0.0964667	-11.2336	2.78973e-29	5.69306e-28
ZNF664	ENSG00000179195.11	protein_coding	1229.65	-0.953942	0.085139	-11.2045	3.87441e-29	7.89676e-28
SSR1	ENSG00000124783.8	protein_coding	4920.58	0.478386	0.042777	11.1833	4.92508e-29	1.00258e-27
TPX2	ENSG00000088325.11	protein_coding	1279.77	-0.961054	0.0860135	-11.1733	5.51053e-29	1.12036e-27
LY6E	ENSG00000160932.6	protein_coding	1544.94	0.835079	0.074936	11.1439	7.66823e-29	1.55712e-27
TAOK1	ENSG00000160551.5	protein_coding	1139.94	1.02222	0.0917996	11.1354	8.44042e-29	1.7118e-27
LRRC8A	ENSG00000136802.7	protein_coding	3005.53	0.60446	0.0543582	11.1199	1.00338e-28	2.03243e-27
SLC7A1	ENSG00000139514.8	protein_coding	1890.34	-0.756547	0.0680563	-11.1165	1.04288e-28	2.10984e-27
IGFBP7-AS1	ENSG00000245067.2	antisense	767.984	-1.25224	0.112655	-11.1158	1.0514e-28	2.12446e-27
HIF1A	ENSG00000100644.12	protein_coding	5249.81	0.479074	0.0431019	11.1149	1.06138e-28	2.14197e-27
TNIK	ENSG00000154310.12	protein_coding	154.786	2.77361	0.250104	11.0898	1.40573e-28	2.83342e-27
UPP1	ENSG00000183696.9	protein_coding	660.386	-1.30768	0.117952	-11.0866	1.45801e-28	2.93519e-27
MRPS6	ENSG00000243927.1	protein_coding	930.534	-1.16689	0.10533	-11.0784	1.59731e-28	3.21167e-27
RPS27A	ENSG00000143947.8	protein_coding	7412.66	0.424623	0.0383332	11.0771	1.61949e-28	3.25228e-27
RPL22	ENSG00000116251.5	protein_coding	6308.19	0.415562	0.0375185	11.0762	1.63679e-28	3.283e-27
LLGL2	ENSG00000073350.9	protein_coding	174.89	-2.88466	0.260453	-11.0755	1.64927e-28	3.30321e-27
CYP1B1	ENSG00000138061.7	protein_coding	199.15	2.42101	0.218593	11.0754	1.6509e-28	3.30321e-27
RRM2	ENSG00000171848.9	protein_coding	462.651	-1.6947	0.15358	-11.0346	2.60111e-28	5.19809e-27
ASF1B	ENSG00000105011.4	protein_coding	276.807	-2.16216	0.196254	-11.0172	3.15812e-28	6.30355e-27
KLF10	ENSG00000155090.10	protein_coding	424.734	1.70623	0.154934	11.0126	3.3217e-28	6.62197e-27
ATM	ENSG00000149311.13	protein_coding	490.105	1.55062	0.140815	11.0117	3.35435e-28	6.67894e-27
TOP1	ENSG00000198900.5	protein_coding	2086.38	0.728055	0.0661169	11.0116	3.35915e-28	6.68039e-27
NBPF1	ENSG00000219481.6	protein_coding	476.807	-1.5578	0.141668	-10.9962	3.98606e-28	7.91752e-27
WTAPP1	ENSG00000255282.2	pseudogene	496.345	1.46063	0.132931	10.9879	4.37084e-28	8.6713e-27
RANGAP1	ENSG00000100401.15	protein_coding	1247.04	-0.924225	0.0844498	-10.9441	7.09347e-28	1.40557e-26
TMEM38A	ENSG00000072954.2	protein_coding	536.848	-1.4463	0.132221	-10.9385	7.5401e-28	1.49227e-26
PVR	ENSG00000073008.10	protein_coding	1509.41	-0.839371	0.0767632	-10.9345	7.88008e-28	1.55767e-26
USP1	ENSG00000162607.8	protein_coding	1036.49	-1.06285	0.0972612	-10.9278	8.4908e-28	1.67637e-26
FAM127A	ENSG00000134590.9	protein_coding	2019.24	0.706726	0.0647529	10.9142	9.86068e-28	1.94449e-26
CUL7	ENSG00000044090.4	protein_coding	799.057	1.13963	0.104587	10.8964	1.19874e-27	2.36103e-26
SAE1	ENSG00000142230.7	protein_coding	2034.63	-0.750891	0.0689659	-10.8879	1.31691e-27	2.59066e-26
MIB1	ENSG00000101752.7	protein_coding	601.704	1.35848	0.124875	10.8787	1.45631e-27	2.86145e-26
TBL1XR1	ENSG00000177565.11	protein_coding	1315.78	0.872158	0.0801816	10.8773	1.479e-27	2.90256e-26
G0S2	ENSG00000123689.5	protein_coding	1720.68	0.787863	0.072575	10.8558	1.87069e-27	3.66687e-26
PCNA	ENSG00000132646.6	protein_coding	1103.56	-0.989067	0.091133	-10.853	1.92981e-27	3.77824e-26
EIF5	ENSG00000100664.6	protein_coding	4030.34	-0.512867	0.0472676	-10.8503	1.9877e-27	3.88692e-26
PGM1	ENSG00000079739.11	protein_coding	1990.9	0.706187	0.0651582	10.838	2.27293e-27	4.4394e-26
FGF5	ENSG00000138675.12	protein_coding	274.439	-2.12315	0.195973	-10.8339	2.37814e-27	4.63935e-26
IRAK3	ENSG00000090376.4	protein_coding	111.294	3.56894	0.329515	10.8309	2.45739e-27	4.78825e-26
PKP4	ENSG00000144283.17	protein_coding	846.659	-1.12076	0.103712	-10.8064	3.20927e-27	6.24587e-26
AC068134.8	ENSG00000224516.1	antisense	117.875	-5.92473	0.548608	-10.7996	3.4584e-27	6.72276e-26
RPL23A	ENSG00000198242.9	protein_coding	7622.2	0.369207	0.0342195	10.7894	3.86456e-27	7.50339e-26
LITAF	ENSG00000189067.8	protein_coding	951.245	-1.0794	0.10035	-10.7563	5.53273e-27	1.07296e-25
ZNF804A	ENSG00000170396.6	protein_coding	225.264	-2.3836	0.22173	-10.75	5.92676e-27	1.14801e-25
MAT2A	ENSG00000168906.8	protein_coding	2608.44	0.643031	0.0598894	10.737	6.82551e-27	1.32054e-25
KLHL24	ENSG00000114796.11	protein_coding	607.634	1.41496	0.131794	10.7361	6.88568e-27	1.33061e-25
ADAMTS1	ENSG00000154734.10	protein_coding	701.375	-1.33784	0.124658	-10.7321	7.19528e-27	1.3888e-25
LRRC2	ENSG00000163827.8	protein_coding	117.836	-4.16345	0.3881	-10.7278	7.53881e-27	1.45339e-25
UQCRC1	ENSG00000010256.6	protein_coding	1511.15	0.818316	0.0762848	10.7271	7.59285e-27	1.46209e-25
RPS4X	ENSG00000198034.6	protein_coding	23783.9	0.218008	0.0203397	10.7184	8.3459e-27	1.60521e-25
HYI	ENSG00000178922.12	protein_coding	505.188	-1.45083	0.135483	-10.7086	9.27925e-27	1.78264e-25
LTA4H	ENSG00000111144.5	protein_coding	1903.23	0.732718	0.068475	10.7005	1.01222e-26	1.9423e-25
HMGB2	ENSG00000164104.7	protein_coding	1297.82	-0.894517	0.0837746	-10.6777	1.2949e-26	2.48182e-25
ANKRD50	ENSG00000151458.7	protein_coding	887.067	1.10983	0.104143	10.6569	1.61988e-26	3.10105e-25
CCND2	ENSG00000118971.3	protein_coding	203.861	2.26951	0.213211	10.6444	1.85112e-26	3.53959e-25
ATXN10	ENSG00000130638.11	protein_coding	1191.03	-0.918837	0.086341	-10.642	1.90102e-26	3.63078e-25
MCM7	ENSG00000166508.13	protein_coding	1370.88	-0.883974	0.083184	-10.6267	2.23811e-26	4.26961e-25
FEM1C	ENSG00000145780.6	protein_coding	602.864	1.27456	0.120081	10.6141	2.56202e-26	4.88183e-25
LDLRAD3	ENSG00000179241.8	protein_coding	646.092	1.26463	0.119275	10.6027	2.89565e-26	5.51115e-25
MAGI1	ENSG00000151276.19	protein_coding	868.555	-1.09939	0.103764	-10.5951	3.14075e-26	5.97071e-25
IL11	ENSG00000095752.2	protein_coding	201.98	-2.53145	0.239006	-10.5916	3.26062e-26	6.19139e-25
NDC1	ENSG00000058804.10	protein_coding	726.457	-1.17687	0.111126	-10.5904	3.30157e-26	6.26191e-25
FLNC	ENSG00000128591.11	protein_coding	807.832	-1.13764	0.107426	-10.59	3.31589e-26	6.28179e-25
MARS	ENSG00000166986.8	protein_coding	2037.83	-0.693757	0.0655385	-10.5855	3.47961e-26	6.58433e-25
RPS13	ENSG00000110700.2	protein_coding	4634.97	0.45598	0.0430823	10.5839	3.53756e-26	6.68627e-25
ITGA3	ENSG00000005884.13	protein_coding	17137.8	-0.272325	0.0257582	-10.5724	4.00261e-26	7.55654e-25
TNNT1	ENSG00000105048.12	protein_coding	890.563	1.04475	0.0988434	10.5697	4.11685e-26	7.76327e-25
PHIP	ENSG00000146247.13	protein_coding	427.244	1.55069	0.147005	10.5485	5.16054e-26	9.7202e-25
RLF	ENSG00000117000.8	protein_coding	659.211	1.30396	0.123772	10.5352	5.94699e-26	1.11887e-24
GLRX	ENSG00000173221.9	protein_coding	1220.39	0.903034	0.0857231	10.5343	6.00166e-26	1.12786e-24
PTEN	ENSG00000171862.5	protein_coding	1186.47	0.925922	0.0879332	10.5298	6.29431e-26	1.1815e-24
KANK2	ENSG00000197256.6	protein_coding	1714.43	0.783767	0.0744583	10.5263	6.53805e-26	1.22585e-24
FZD8	ENSG00000177283.4	protein_coding	749.369	1.17559	0.111817	10.5136	7.4807e-26	1.40098e-24
ATP1A1OS	ENSG00000203865.5	processed_transcript	4083.49	0.486602	0.0463385	10.501	8.54481e-26	1.59844e-24
STXBP5	ENSG00000164506.10	protein_coding	312.81	1.79241	0.170729	10.4986	8.76791e-26	1.63831e-24
GANAB	ENSG00000089597.12	protein_coding	5181.72	0.44233	0.0421566	10.4926	9.34706e-26	1.74454e-24
NUDT16	ENSG00000198585.7	protein_coding	560.617	1.29618	0.123555	10.4907	9.53245e-26	1.77711e-24
SP140	ENSG00000079263.14	protein_coding	304.196	-1.86875	0.178167	-10.4888	9.72854e-26	1.81161e-24
AKAP11	ENSG00000023516.7	protein_coding	589.268	1.26525	0.120689	10.4836	1.02786e-25	1.91187e-24
CFP	ENSG00000126759.8	protein_coding	186.358	2.36637	0.22578	10.4809	1.05759e-25	1.96493e-24
RRAS2	ENSG00000133818.8	protein_coding	1029.19	-0.985898	0.0941068	-10.4764	1.1091e-25	2.0583e-24
HLA-DMA	ENSG00000204257.10	protein_coding	416.467	1.60391	0.153282	10.4638	1.26607e-25	2.34695e-24
STX1A	ENSG00000106089.7	protein_coding	380.36	1.5754	0.150653	10.4572	1.35839e-25	2.51524e-24
FAM65B	ENSG00000111913.11	protein_coding	69.4352	5.83718	0.559286	10.4368	1.68308e-25	3.10944e-24
RDX	ENSG00000137710.10	protein_coding	1564.65	0.767851	0.0735706	10.4369	1.68178e-25	3.10944e-24
MVP	ENSG00000013364.14	protein_coding	1343.56	0.855391	0.0819778	10.4344	1.7265e-25	3.18606e-24
HSPB1	ENSG00000106211.8	protein_coding	1644.77	0.822251	0.0788173	10.4324	1.76434e-25	3.25222e-24
DTNBP1	ENSG00000047579.15	protein_coding	603.683	-1.2753	0.122344	-10.4239	1.92974e-25	3.5531e-24
MLXIP	ENSG00000175727.9	protein_coding	1265.03	0.86283	0.0827864	10.4224	1.96018e-25	3.6051e-24
MAL2	ENSG00000147676.9	protein_coding	738.427	-1.14602	0.109965	-10.4217	1.97343e-25	3.62541e-24
TMEM164	ENSG00000157600.7	protein_coding	716.364	1.13443	0.108935	10.4139	2.14351e-25	3.93344e-24
OSBPL3	ENSG00000070882.8	protein_coding	563.816	-1.3797	0.132581	-10.4065	2.31678e-25	4.24666e-24
CRTAP	ENSG00000170275.10	protein_coding	4038.74	0.503369	0.048402	10.3998	2.4857e-25	4.5512e-24
GNE	ENSG00000159921.10	protein_coding	808.007	-1.12143	0.107852	-10.3978	2.53727e-25	4.64043e-24
GAS6	ENSG00000183087.10	protein_coding	2158.03	-0.673266	0.0647731	-10.3942	2.63413e-25	4.81221e-24
BST2	ENSG00000130303.8	protein_coding	1850.61	0.746148	0.0718075	10.3909	2.72651e-25	4.97543e-24
TP53	ENSG00000141510.11	protein_coding	998.183	-0.991945	0.0954921	-10.3877	2.82024e-25	5.14074e-24
AFF3	ENSG00000144218.14	protein_coding	457.966	-1.54584	0.148877	-10.3833	2.95275e-25	5.3763e-24
ARHGAP23	ENSG00000225485.3	protein_coding	1416.77	-0.86895	0.0836895	-10.383	2.96249e-25	5.38804e-24
LTBP2	ENSG00000119681.7	protein_coding	408.705	1.65603	0.159615	10.3751	3.21751e-25	5.84538e-24
PEPD	ENSG00000124299.9	protein_coding	775.652	-1.11223	0.107258	-10.3696	3.40862e-25	6.18571e-24
C8orf4	ENSG00000176907.3	protein_coding	67.9752	5.81156	0.561193	10.3557	3.9419e-25	7.14557e-24
SMTN	ENSG00000183963.14	protein_coding	540.481	1.31292	0.126857	10.3496	4.20263e-25	7.60979e-24
COL8A1	ENSG00000144810.11	protein_coding	1558.39	-0.868801	0.0840281	-10.3394	4.67419e-25	8.45431e-24
RAPGEF1	ENSG00000107263.14	protein_coding	1062.89	-0.94303	0.0912093	-10.3392	4.68487e-25	8.46428e-24
RBBP7	ENSG00000102054.13	protein_coding	1612.54	-0.781586	0.0756168	-10.3361	4.8362e-25	8.72806e-24
IFITM2	ENSG00000185201.12	protein_coding	904.207	1.02357	0.0991337	10.3252	5.42296e-25	9.77624e-24
SUN3	ENSG00000164744.8	protein_coding	114.874	-3.65619	0.354706	-10.3077	6.50585e-25	1.17155e-23
SACS	ENSG00000151835.9	protein_coding	697.083	1.13347	0.110026	10.3019	6.91128e-25	1.2432e-23
STAG2	ENSG00000101972.14	protein_coding	1800.12	0.706491	0.0686339	10.2936	7.52922e-25	1.35287e-23
CLIC6	ENSG00000159212.8	protein_coding	512.296	-1.57869	0.15345	-10.288	7.98448e-25	1.4331e-23
CFL2	ENSG00000165410.10	protein_coding	1323.64	-0.85922	0.0836142	-10.276	9.0398e-25	1.62073e-23
PSAP	ENSG00000197746.9	protein_coding	17149.9	0.243237	0.0236762	10.2735	9.27699e-25	1.66144e-23
TRIB3	ENSG00000101255.6	protein_coding	1570.29	-0.778845	0.0758396	-10.2696	9.65778e-25	1.72775e-23
RP11-184M15.1	ENSG00000248187.1	lincRNA	66.3845	6.01635	0.585853	10.2694	9.68162e-25	1.73013e-23
GNLY	ENSG00000115523.12	protein_coding	65.5551	6.00735	0.585866	10.2538	1.13795e-24	2.03132e-23
HIPK3	ENSG00000110422.7	protein_coding	696.429	1.13401	0.110596	10.2536	1.14069e-24	2.034e-23
KIF2C	ENSG00000142945.8	protein_coding	475.332	-1.54154	0.150389	-10.2504	1.17865e-24	2.09941e-23
TGFBR1	ENSG00000106799.8	protein_coding	1270.71	0.846191	0.0826007	10.2444	1.25463e-24	2.23231e-23
EZH2	ENSG00000106462.6	protein_coding	376.776	-1.622	0.158338	-10.2439	1.2604e-24	2.24015e-23
YAP1	ENSG00000137693.9	protein_coding	2325.73	0.617464	0.0602926	10.2411	1.29725e-24	2.30315e-23
RGS7	ENSG00000182901.11	protein_coding	102.46	-4.12788	0.403424	-10.2321	1.4239e-24	2.52526e-23
ESAM	ENSG00000149564.7	protein_coding	1152.73	-0.966647	0.0946039	-10.2178	1.64982e-24	2.91972e-23
DPF3	ENSG00000205683.7	protein_coding	165.874	-2.70233	0.264472	-10.2178	1.64988e-24	2.91972e-23
MALL	ENSG00000144063.3	protein_coding	171.124	2.43248	0.238208	10.2116	1.75931e-24	3.11002e-23
EIF2S2	ENSG00000125977.6	protein_coding	4391.93	-0.474934	0.0465683	-10.1987	2.01024e-24	3.54976e-23
ATOH8	ENSG00000168874.8	protein_coding	67.7184	5.07053	0.497454	10.193	2.13148e-24	3.75981e-23
WLS	ENSG00000116729.9	protein_coding	1706.59	0.747006	0.073302	10.1908	2.17954e-24	3.84045e-23
HDLBP	ENSG00000115677.12	protein_coding	5775.84	0.416423	0.040876	10.1875	2.25577e-24	3.9705e-23
PCNXL4	ENSG00000126773.8	protein_coding	2102.48	-0.663097	0.0651856	-10.1724	2.63209e-24	4.62791e-23
FNDC3A	ENSG00000102531.12	protein_coding	610.802	1.29902	0.127717	10.1711	2.66883e-24	4.68747e-23
UBR5	ENSG00000104517.8	protein_coding	1374.81	0.809564	0.0795972	10.1708	2.67796e-24	4.69847e-23
IL1RL1	ENSG00000115602.12	protein_coding	67.4171	5.06308	0.497919	10.1685	2.7414e-24	4.80463e-23
PDE1C	ENSG00000154678.12	protein_coding	195.654	-2.48061	0.244237	-10.1565	3.09867e-24	5.425e-23
BTF3	ENSG00000145741.11	protein_coding	8261.34	0.339088	0.0333884	10.1559	3.12016e-24	5.45679e-23
TUBA4A	ENSG00000127824.9	protein_coding	502.366	1.36248	0.134388	10.1384	3.73268e-24	6.52104e-23
BRWD3	ENSG00000165288.10	protein_coding	567.879	1.23591	0.122008	10.1298	4.07548e-24	7.11234e-23
BSG	ENSG00000172270.14	protein_coding	10963.9	0.301674	0.0297826	10.1292	4.09896e-24	7.14571e-23
DDX39A	ENSG00000123136.10	protein_coding	1202.83	-0.872415	0.0861541	-10.1262	4.22731e-24	7.36162e-23
HOOK3	ENSG00000168172.4	protein_coding	310.319	1.70505	0.168661	10.1094	5.02148e-24	8.73535e-23
ASH1L	ENSG00000116539.6	protein_coding	836.904	1.04864	0.103813	10.1013	5.45394e-24	9.46755e-23
CDC20	ENSG00000117399.9	protein_coding	611.55	-1.2282	0.121588	-10.1013	5.45038e-24	9.46755e-23
FNDC3B	ENSG00000075420.8	protein_coding	1538.54	0.751649	0.0744389	10.0975	5.66512e-24	9.82375e-23
NPEPPS	ENSG00000141279.11	protein_coding	1597.64	0.746095	0.0740008	10.0823	6.61855e-24	1.14649e-22
PTPRG	ENSG00000144724.14	protein_coding	1067.34	0.992369	0.098502	10.0746	7.15492e-24	1.2381e-22
EDEM3	ENSG00000116406.14	protein_coding	675.029	1.18302	0.117516	10.0668	7.74374e-24	1.33857e-22
ZNF385B	ENSG00000144331.14	protein_coding	74.634	4.1717	0.414442	10.0658	7.8247e-24	1.35114e-22
LPAR1	ENSG00000198121.9	protein_coding	964.295	-0.965244	0.0959518	-10.0597	8.32711e-24	1.43638e-22
HLA-DPB1	ENSG00000223865.6	protein_coding	73.5066	4.4019	0.437607	10.059	8.38121e-24	1.44419e-22
MCAM	ENSG00000076706.10	protein_coding	1367.14	-0.827315	0.0823141	-10.0507	9.12157e-24	1.57012e-22
FAM211A	ENSG00000181350.7	protein_coding	2748.03	0.580948	0.0579086	10.0322	1.10087e-23	1.89297e-22
EIF4EBP1	ENSG00000187840.4	protein_coding	1551.52	-0.75691	0.0754526	-10.0316	1.10714e-23	1.90176e-22
JUN	ENSG00000177606.5	protein_coding	1447.7	0.908882	0.0906224	10.0293	1.13284e-23	1.94385e-22
DLGAP4	ENSG00000080845.13	protein_coding	1973.93	0.660496	0.065986	10.0096	1.38262e-23	2.36997e-22
EDN2	ENSG00000127129.5	protein_coding	63.9339	5.48006	0.54797	10.0007	1.51388e-23	2.59227e-22
ABHD4	ENSG00000100439.6	protein_coding	1367.56	-0.808266	0.0808313	-9.99941	1.53307e-23	2.62239e-22
SCRN1	ENSG00000136193.12	protein_coding	1723.58	-0.825811	0.0826267	-9.99448	1.61136e-23	2.75343e-22
PRRC2A	ENSG00000204469.8	protein_coding	6217.62	0.38236	0.0382881	9.98638	1.74856e-23	2.98476e-22
PFKFB2	ENSG00000123836.10	protein_coding	295.452	-1.8298	0.183314	-9.98175	1.83208e-23	3.12407e-22
CERCAM	ENSG00000167123.14	protein_coding	1031.49	0.951502	0.095344	9.97968	1.87072e-23	3.18664e-22
GCNT1	ENSG00000187210.8	protein_coding	350.926	1.60433	0.160884	9.97195	2.02215e-23	3.44102e-22
INPP4B	ENSG00000109452.8	protein_coding	595.414	-1.28505	0.128925	-9.96744	2.11616e-23	3.59726e-22
IPO5	ENSG00000065150.14	protein_coding	2768.66	-0.587806	0.0590726	-9.95058	2.5073e-23	4.25773e-22
TOR1AIP2	ENSG00000169905.8	protein_coding	1229.89	0.856268	0.086076	9.94781	2.57787e-23	4.37305e-22
CASC7	ENSG00000259758.1	lincRNA	1224.66	0.841088	0.0845593	9.94672	2.60633e-23	4.41674e-22
LRRC8D	ENSG00000171492.10	protein_coding	363.989	-1.59666	0.160541	-9.94554	2.6375e-23	4.46496e-22
FKBP1A	ENSG00000088832.10	protein_coding	6394.36	-0.369925	0.0372252	-9.9375	2.859e-23	4.83492e-22
PHTF2	ENSG00000006576.12	protein_coding	267.855	-1.90017	0.191407	-9.92742	3.16349e-23	5.34433e-22
SERTAD4-AS1	ENSG00000203706.4	antisense	87.0745	-5.55057	0.559345	-9.92333	3.29587e-23	5.56224e-22
HIVEP2	ENSG00000010818.4	protein_coding	796.573	1.05745	0.106583	9.92142	3.35926e-23	5.66339e-22
TLR4	ENSG00000136869.13	protein_coding	1009.41	-0.968067	0.0976206	-9.91663	3.52461e-23	5.93606e-22
PLXND1	ENSG00000004399.8	protein_coding	925.52	1.00277	0.101163	9.91244	3.67547e-23	6.18377e-22
HNRNPC	ENSG00000092199.13	protein_coding	9351.19	0.313813	0.03166	9.91199	3.69208e-23	6.20535e-22
SIGMAR1	ENSG00000147955.12	protein_coding	1645.69	-0.779708	0.0786842	-9.90934	3.7916e-23	6.36608e-22
CPEB2	ENSG00000137449.11	protein_coding	568.902	1.24436	0.125712	9.89848	4.22632e-23	7.08871e-22
ILDR2	ENSG00000143195.8	protein_coding	147.687	-2.97184	0.300323	-9.89549	4.35481e-23	7.29675e-22
CLDN7	ENSG00000181885.14	protein_coding	335.747	1.58793	0.160678	9.88273	4.94658e-23	8.27983e-22
RPS6KA2	ENSG00000071242.7	protein_coding	610.899	1.17564	0.119297	9.85474	6.53857e-23	1.09334e-21
FAT3	ENSG00000165323.11	protein_coding	115.951	-3.30932	0.33599	-9.84947	6.89072e-23	1.15105e-21
CD22	ENSG00000012124.10	protein_coding	103.919	-3.62869	0.368457	-9.84833	6.96921e-23	1.16298e-21
ALOX5AP	ENSG00000132965.5	protein_coding	58.2803	5.83771	0.592847	9.84691	7.06858e-23	1.17836e-21
C1RL	ENSG00000139178.6	protein_coding	114.466	2.89161	0.29375	9.84376	7.29351e-23	1.21462e-21
ACTB	ENSG00000075624.9	protein_coding	25732.1	-0.194186	0.0197426	-9.83593	7.88341e-23	1.31153e-21
PLAU	ENSG00000122861.11	protein_coding	517.415	-1.38338	0.140662	-9.83478	7.97424e-23	1.32529e-21
HELZ2	ENSG00000130589.12	protein_coding	346.11	1.55204	0.157863	9.83151	8.23712e-23	1.3676e-21
GNAI2	ENSG00000114353.12	protein_coding	3346.53	0.518296	0.0527851	9.819	9.32685e-23	1.54696e-21
RPL18	ENSG00000063177.8	protein_coding	6172.44	0.370219	0.0377151	9.8162	9.58914e-23	1.58885e-21
RP11-519G16.5	ENSG00000259342.1	antisense	137.679	2.57018	0.261901	9.81353	9.84638e-23	1.62982e-21
FAIM3	ENSG00000162894.7	protein_coding	137.347	-2.8531	0.290788	-9.81161	1.00357e-22	1.65949e-21
XPOT	ENSG00000184575.7	protein_coding	3216.22	-0.520091	0.0530147	-9.81032	1.01646e-22	1.6791e-21
CTD-2369P2.8	ENSG00000267607.1	antisense	656.209	1.11107	0.113474	9.79141	1.22574e-22	2.02278e-21
IRAK1	ENSG00000184216.7	protein_coding	2847.84	-0.540335	0.0552408	-9.78144	1.35268e-22	2.23002e-21
MGST1	ENSG00000008394.8	protein_coding	1524.92	0.73874	0.0755528	9.7778	1.40228e-22	2.30946e-21
SLC4A2	ENSG00000164889.8	protein_coding	1250.05	-0.822918	0.0841732	-9.77648	1.42068e-22	2.33742e-21
CXCL3	ENSG00000163734.4	protein_coding	76.5699	3.8326	0.392503	9.76451	1.59881e-22	2.62785e-21
HSD11B1	ENSG00000117594.5	protein_coding	124.023	2.79417	0.28618	9.76368	1.61193e-22	2.64676e-21
DHFR	ENSG00000228716.2	protein_coding	423.173	-1.4586	0.149493	-9.75694	1.72281e-22	2.82599e-21
TMEM104	ENSG00000109066.9	protein_coding	612.142	-1.19774	0.122841	-9.7503	1.83919e-22	3.01389e-21
OCLN	ENSG00000197822.6	protein_coding	139.342	-2.77808	0.285033	-9.74652	1.90908e-22	3.12529e-21
ZBTB7B	ENSG00000160685.9	protein_coding	489.796	1.28512	0.131879	9.74468	1.9439e-22	3.17911e-21
TMEM106C	ENSG00000134291.7	protein_coding	339.247	-1.63043	0.167362	-9.74191	1.99764e-22	3.26374e-21
ZMIZ2	ENSG00000122515.10	protein_coding	928.731	0.948657	0.097386	9.74121	2.01152e-22	3.28315e-21
RN7SL1	ENSG00000258486.2	antisense	96.561	3.16495	0.325413	9.72597	2.33679e-22	3.81024e-21
CD151	ENSG00000177697.13	protein_coding	3012.77	0.53426	0.0549341	9.72547	2.34812e-22	3.82492e-21
SPTLC2	ENSG00000100596.2	protein_coding	1640.96	-0.710066	0.0731406	-9.70823	2.78134e-22	4.5261e-21
ASNS	ENSG00000070669.12	protein_coding	1451.99	-0.809596	0.0833942	-9.70807	2.7857e-22	4.5287e-21
GPX1P1	ENSG00000197582.5	pseudogene	449.382	1.35351	0.139614	9.69469	3.17585e-22	5.15785e-21
PARP1	ENSG00000143799.8	protein_coding	1392.8	-0.782835	0.0807771	-9.6913	3.2833e-22	5.32707e-21
SMG1	ENSG00000157106.12	protein_coding	1043.93	0.869851	0.0897783	9.68888	3.36191e-22	5.44923e-21
DNAJB6	ENSG00000105993.10	protein_coding	4648.02	-0.420041	0.0433923	-9.68007	3.66459e-22	5.93395e-21
BBX	ENSG00000114439.14	protein_coding	1442.16	0.760602	0.0785901	9.67809	3.73622e-22	6.04397e-21
EIF3H	ENSG00000147677.6	protein_coding	6417.37	0.364553	0.0376877	9.67299	3.92718e-22	6.34662e-21
COLGALT2	ENSG00000198756.6	protein_coding	584.199	-1.25788	0.130222	-9.65956	4.47792e-22	7.22952e-21
CTNNAL1	ENSG00000119326.10	protein_coding	1272.63	-0.820534	0.0849803	-9.65558	4.65534e-22	7.50856e-21
PFN1	ENSG00000108518.7	protein_coding	11172.3	-0.276841	0.0286908	-9.64914	4.95713e-22	7.98747e-21
SH3GLB1	ENSG00000097033.10	protein_coding	2175.98	0.604712	0.0627189	9.64162	5.33397e-22	8.58622e-21
ATRN	ENSG00000088812.13	protein_coding	759.248	1.01875	0.10571	9.63719	5.56905e-22	8.95584e-21
CCNG2	ENSG00000138764.9	protein_coding	789.552	1.00623	0.104437	9.6348	5.70026e-22	9.15786e-21
SPDEF	ENSG00000124664.6	protein_coding	893.99	0.965709	0.100242	9.63377	5.75784e-22	9.24131e-21
CTSD	ENSG00000117984.8	protein_coding	14576.8	0.243567	0.0253052	9.62517	6.26024e-22	1.00378e-20
ZWINT	ENSG00000122952.12	protein_coding	345.421	-1.62149	0.168467	-9.625	6.27091e-22	1.00451e-20
DYNC2H1	ENSG00000187240.9	protein_coding	215.173	2.11728	0.220123	9.61863	6.67108e-22	1.06757e-20
CHAF1B	ENSG00000159259.7	protein_coding	171.507	-2.49244	0.25918	-9.61665	6.80096e-22	1.08729e-20
GNG12	ENSG00000172380.5	protein_coding	2247.44	-0.605436	0.0629997	-9.61014	7.24516e-22	1.15718e-20
DYNC1H1	ENSG00000197102.6	protein_coding	11520.5	0.271306	0.0282319	9.60993	7.25949e-22	1.15834e-20
MYLK	ENSG00000065534.14	protein_coding	431.776	-1.42566	0.148438	-9.60442	7.65866e-22	1.22084e-20
CD82	ENSG00000085117.7	protein_coding	838.366	0.965964	0.100716	9.59098	8.72514e-22	1.38949e-20
MXRA7	ENSG00000182534.9	protein_coding	2227.46	0.593397	0.0620013	9.57071	1.06178e-21	1.68926e-20
PDLIM4	ENSG00000131435.8	protein_coding	288.941	1.84814	0.193442	9.55399	1.24791e-21	1.98346e-20
DAB2IP	ENSG00000136848.12	protein_coding	532.464	-1.241	0.13014	-9.53583	1.48691e-21	2.36105e-20
USP53	ENSG00000145390.7	protein_coding	642.201	1.12366	0.117936	9.52774	1.60742e-21	2.54993e-20
DAAM2	ENSG00000146122.12	protein_coding	524.485	1.27897	0.134266	9.52566	1.64002e-21	2.59912e-20
PRDX2	ENSG00000167815.7	protein_coding	3325.98	0.481638	0.0505802	9.52225	1.69465e-21	2.68311e-20
FAM46A	ENSG00000112773.11	protein_coding	180.328	2.13186	0.224037	9.51567	1.80544e-21	2.85576e-20
NUMA1	ENSG00000137497.13	protein_coding	2674.52	0.551324	0.0579463	9.51439	1.82783e-21	2.8884e-20
PSME4	ENSG00000068878.10	protein_coding	1397.41	0.746784	0.0785025	9.51286	1.85483e-21	2.92823e-20
IQGAP1	ENSG00000140575.8	protein_coding	3502.26	0.480748	0.0505748	9.50569	1.98729e-21	3.13433e-20
LIPH	ENSG00000163898.5	protein_coding	407.116	-1.56304	0.164495	-9.50208	2.05732e-21	3.24167e-20
IFIT1	ENSG00000185745.8	protein_coding	426.037	1.3404	0.141122	9.4982	2.13544e-21	3.36152e-20
CCNA2	ENSG00000145386.5	protein_coding	441.982	-1.42907	0.150479	-9.49675	2.16537e-21	3.40537e-20
UBALD2	ENSG00000185262.7	protein_coding	931.009	0.928518	0.0977856	9.49544	2.19278e-21	3.44517e-20
YBX3	ENSG00000060138.8	protein_coding	1927.25	0.630933	0.0664617	9.49318	2.24102e-21	3.51758e-20
VPS13C	ENSG00000129003.11	protein_coding	291.662	1.66493	0.175475	9.48816	2.35155e-21	3.68754e-20
IPO7	ENSG00000205339.5	protein_coding	3323.97	0.482923	0.0509356	9.48105	2.51726e-21	3.94363e-20
SYNGR2	ENSG00000108639.3	protein_coding	1639.78	-0.690482	0.0728843	-9.47368	2.70157e-21	4.22832e-20
HEXB	ENSG00000049860.9	protein_coding	1632.99	-0.691534	0.0730062	-9.47227	2.73829e-21	4.28172e-20
CDCA5	ENSG00000146670.5	protein_coding	308.289	-1.76992	0.186934	-9.46815	2.84835e-21	4.44956e-20
PHF19	ENSG00000119403.9	protein_coding	518.769	-1.28697	0.135942	-9.46705	2.87848e-21	4.49234e-20
DNAJC9	ENSG00000213551.4	protein_coding	625.496	-1.13459	0.119881	-9.46433	2.9544e-21	4.60644e-20
NAGS	ENSG00000161653.6	protein_coding	334.064	1.51543	0.160179	9.46084	3.05485e-21	4.75853e-20
SRSF1	ENSG00000136450.8	protein_coding	1484.95	-0.731986	0.0773837	-9.45918	3.10382e-21	4.83022e-20
ARRB2	ENSG00000141480.13	protein_coding	220.345	-2.00334	0.211927	-9.45299	3.293e-21	5.11977e-20
ZNF367	ENSG00000165244.6	protein_coding	143.157	-2.67003	0.282678	-9.44546	3.53851e-21	5.49627e-20
FUT11	ENSG00000196968.6	protein_coding	345.628	1.52335	0.161405	9.43805	3.79789e-21	5.89357e-20
RAB3D	ENSG00000105514.3	protein_coding	131.705	2.69821	0.285906	9.43742	3.82087e-21	5.92361e-20
CLIC1	ENSG00000213719.4	protein_coding	13168.1	0.251164	0.0266252	9.43331	3.97364e-21	6.15464e-20
PLBD2	ENSG00000151176.3	protein_coding	757.328	1.01413	0.107508	9.4331	3.98157e-21	6.16109e-20
MAP2K3	ENSG00000034152.14	protein_coding	772.074	-1.09306	0.116097	-9.41499	4.73105e-21	7.31394e-20
PIGT	ENSG00000124155.12	protein_coding	2522.32	0.54805	0.0582478	9.40895	5.01125e-21	7.73981e-20
H1F0	ENSG00000189060.4	protein_coding	2561.03	0.573699	0.0610958	9.39015	5.99146e-21	9.24502e-20
CLEC2B	ENSG00000110852.4	protein_coding	228.121	1.84665	0.196765	9.38509	6.28616e-21	9.69063e-20
NIPAL3	ENSG00000001461.12	protein_coding	1306.66	-0.790826	0.0844124	-9.3686	7.35013e-21	1.13202e-19
RIN3	ENSG00000100599.11	protein_coding	291.887	-1.67697	0.179081	-9.36431	7.65488e-21	1.17784e-19
NAMPTL	ENSG00000229644.4	protein_coding	330.139	1.50078	0.160366	9.3585	8.08743e-21	1.24323e-19
PPM1H	ENSG00000111110.7	protein_coding	109.672	-3.15695	0.337367	-9.3576	8.1565e-21	1.25268e-19
RP11-91K9.1	ENSG00000231574.1	lincRNA	55.2549	4.76635	0.509924	9.34718	9.00183e-21	1.38121e-19
DDX6	ENSG00000110367.7	protein_coding	911.855	0.918358	0.0982874	9.3436	9.3112e-21	1.42734e-19
PPP4R1	ENSG00000154845.11	protein_coding	1248.28	-0.7816	0.0836872	-9.33954	9.67512e-21	1.48174e-19
MKI67	ENSG00000148773.8	protein_coding	1378.57	-0.756294	0.0809794	-9.33934	9.6937e-21	1.4832e-19
PEBP1	ENSG00000089220.4	protein_coding	3374.57	-0.476976	0.0511613	-9.32298	1.1312e-20	1.7292e-19
LIFR	ENSG00000113594.5	protein_coding	496.517	1.24157	0.13323	9.31903	1.1741e-20	1.7931e-19
THEM6	ENSG00000130193.7	protein_coding	476.477	-1.28829	0.138427	-9.30665	1.31932e-20	2.013e-19
WWC1	ENSG00000113645.9	protein_coding	399.042	-1.41912	0.152518	-9.3046	1.34493e-20	2.05017e-19
GJB2	ENSG00000165474.5	protein_coding	106.318	3.00876	0.323846	9.29071	1.53267e-20	2.33419e-19
TGFBR3	ENSG00000069702.6	protein_coding	261.483	-1.78509	0.192409	-9.27759	1.7336e-20	2.63775e-19
SIPA1L2	ENSG00000116991.6	protein_coding	132.494	2.75053	0.29674	9.26917	1.87597e-20	2.85172e-19
FAM208A	ENSG00000163946.9	protein_coding	946.522	0.898581	0.0969943	9.26427	1.96421e-20	2.98309e-19
ADRA1B	ENSG00000170214.3	protein_coding	187.456	2.05572	0.222481	9.24	2.46494e-20	3.74009e-19
TMEM156	ENSG00000121895.7	protein_coding	938.82	-0.89891	0.0973054	-9.23803	2.5108e-20	3.80615e-19
SLC1A4	ENSG00000115902.6	protein_coding	434.522	-1.35888	0.147197	-9.23174	2.66276e-20	4.03278e-19
KIFC1	ENSG00000237649.3	protein_coding	463.016	-1.29227	0.14	-9.2305	2.6938e-20	4.07602e-19
CTPS1	ENSG00000171793.9	protein_coding	591.649	-1.13396	0.122879	-9.22826	2.75058e-20	4.15809e-19
KIAA1462	ENSG00000165757.8	protein_coding	74.2253	3.63352	0.394562	9.209	3.29181e-20	4.9717e-19
RLIM	ENSG00000131263.8	protein_coding	985.364	0.851707	0.092553	9.20237	3.50125e-20	5.28314e-19
CDT1	ENSG00000167513.4	protein_coding	222.151	-2.1383	0.232386	-9.20153	3.52881e-20	5.31984e-19
NPR3	ENSG00000113389.11	protein_coding	49.7792	5.15205	0.560984	9.18396	4.15533e-20	6.25859e-19
ST6GALNAC5	ENSG00000117069.10	protein_coding	97.5916	-3.35465	0.365399	-9.18078	4.27987e-20	6.439e-19
RHOJ	ENSG00000126785.8	protein_coding	383.001	-1.50445	0.163871	-9.1807	4.28297e-20	6.439e-19
PROM2	ENSG00000155066.11	protein_coding	54.6529	4.59514	0.501288	9.16666	4.8788e-20	7.32804e-19
LIPA	ENSG00000107798.13	protein_coding	1379.42	-0.732896	0.0799629	-9.16546	4.93375e-20	7.40379e-19
LARP4B	ENSG00000107929.10	protein_coding	1251.21	-0.76424	0.0834376	-9.15941	5.2181e-20	7.82333e-19
UBE2E3	ENSG00000170035.11	protein_coding	1580.29	0.680922	0.0743704	9.15582	5.39478e-20	8.08083e-19
ST6GALNAC6	ENSG00000160408.10	protein_coding	799.935	0.955034	0.104325	9.15444	5.46384e-20	8.17679e-19
OSBPL8	ENSG00000091039.12	protein_coding	1295.75	0.785975	0.0858695	9.15312	5.531e-20	8.26975e-19
CYBA	ENSG00000051523.6	protein_coding	492.848	1.23978	0.1357	9.13616	6.47122e-20	9.66672e-19
ZKSCAN1	ENSG00000106261.12	protein_coding	554.528	1.15649	0.126586	9.13599	6.4808e-20	9.67222e-19
EVC	ENSG00000072840.8	protein_coding	680.293	-1.05476	0.115496	-9.13244	6.69741e-20	9.98639e-19
RRP15	ENSG00000067533.5	protein_coding	727.997	-1.0876	0.119206	-9.12371	7.25934e-20	1.08144e-18
FIG4	ENSG00000112367.6	protein_coding	274.468	-1.68898	0.185201	-9.11974	7.53072e-20	1.12085e-18
INHBA	ENSG00000122641.9	protein_coding	155.702	2.17313	0.238345	9.11758	7.68205e-20	1.14234e-18
ZC3H12C	ENSG00000149289.6	protein_coding	518.003	1.19229	0.130802	9.1152	7.85279e-20	1.16667e-18
MASTL	ENSG00000120539.10	protein_coding	282.44	-1.68758	0.185207	-9.11182	8.10088e-20	1.20244e-18
IMPAD1	ENSG00000104331.4	protein_coding	1039.61	0.818498	0.0898536	9.10924	8.29641e-20	1.23035e-18
SLC26A2	ENSG00000155850.7	protein_coding	635.647	1.13219	0.124349	9.10492	8.63269e-20	1.27906e-18
PAPSS2	ENSG00000198682.8	protein_coding	931.404	-0.932181	0.102435	-9.10021	9.01563e-20	1.33459e-18
FAM111B	ENSG00000189057.6	protein_coding	192.899	-2.10565	0.231404	-9.09948	9.07693e-20	1.34245e-18
IFI16	ENSG00000163565.14	protein_coding	3002.2	0.485633	0.0533891	9.09611	9.36233e-20	1.38341e-18
RANBP9	ENSG00000010017.9	protein_coding	1679.81	-0.668368	0.0735225	-9.09066	9.84364e-20	1.45322e-18
PDLIM5	ENSG00000163110.10	protein_coding	2556.58	-0.538031	0.0592154	-9.08599	1.02757e-19	1.51565e-18
C6orf48	ENSG00000204387.8	protein_coding	1982.87	-0.615836	0.0678223	-9.08014	1.08434e-19	1.59793e-18
ATP8B2	ENSG00000143515.12	protein_coding	366.62	-1.45764	0.16055	-9.07904	1.09541e-19	1.6128e-18
MLEC	ENSG00000110917.3	protein_coding	3341.64	0.461254	0.0508249	9.07537	1.13296e-19	1.66659e-18
ERCC2	ENSG00000104884.10	protein_coding	698.445	-1.04266	0.114919	-9.07305	1.15734e-19	1.70093e-18
ATP6V0E2	ENSG00000171130.13	protein_coding	212.49	-1.94186	0.214062	-9.0715	1.17393e-19	1.72376e-18
PRICKLE1	ENSG00000139174.6	protein_coding	125.065	-2.74897	0.303108	-9.06927	1.19813e-19	1.75772e-18
LMO7	ENSG00000136153.15	protein_coding	1317.43	-0.747656	0.0825288	-9.05933	1.3125e-19	1.92379e-18
RPL26	ENSG00000161970.8	protein_coding	1463.84	0.720391	0.0795204	9.05919	1.31425e-19	1.92463e-18
NCAPH	ENSG00000121152.5	protein_coding	266.325	-1.69876	0.187599	-9.05528	1.36217e-19	1.99303e-18
TSEN15	ENSG00000198860.7	protein_coding	709.55	-1.03368	0.114209	-9.05083	1.41882e-19	2.07405e-18
RP11-818F20.5	ENSG00000257732.1	antisense	83.8131	-3.87975	0.428808	-9.04775	1.45938e-19	2.13145e-18
ERP29	ENSG00000089248.6	protein_coding	2852.6	-0.501989	0.0554875	-9.04689	1.47102e-19	2.14654e-18
CCDC68	ENSG00000166510.9	protein_coding	132.18	-2.69836	0.298301	-9.04577	1.48614e-19	2.16667e-18
PIP5K1A	ENSG00000143398.15	protein_coding	868.212	-0.955574	0.105669	-9.04309	1.52303e-19	2.21848e-18
RAB27A	ENSG00000069974.11	protein_coding	475.289	1.25683	0.139028	9.04012	1.56496e-19	2.27754e-18
ARHGDIA	ENSG00000141522.7	protein_coding	6548.63	-0.335025	0.0370696	-9.03774	1.5995e-19	2.32574e-18
MEGF8	ENSG00000105429.8	protein_coding	251.13	1.68292	0.186397	9.02868	1.7375e-19	2.52415e-18
CYTH3	ENSG00000008256.11	protein_coding	872.409	-0.929072	0.102969	-9.02287	1.83231e-19	2.65952e-18
TRIP12	ENSG00000153827.9	protein_coding	1876.98	0.60959	0.0676065	9.01674	1.93777e-19	2.81011e-18
BZW1	ENSG00000082153.13	protein_coding	4322.86	0.433125	0.0480556	9.01299	2.0051e-19	2.90517e-18
HSD17B4	ENSG00000133835.10	protein_coding	1287.62	0.735528	0.0816769	9.00534	2.15007e-19	3.11247e-18
RP11-129B22.1	ENSG00000241111.1	antisense	73.4602	3.39567	0.377249	9.00114	2.23394e-19	3.23103e-18
PRDM1	ENSG00000057657.10	protein_coding	103.693	2.71206	0.301342	8.99995	2.25823e-19	3.26328e-18
PCYT2	ENSG00000185813.6	protein_coding	1066.69	-0.823613	0.091533	-8.998	2.29875e-19	3.3189e-18
SSR2	ENSG00000163479.9	protein_coding	2362.24	0.550295	0.0611606	8.99754	2.3084e-19	3.32991e-18
MOSPD1	ENSG00000101928.8	protein_coding	537.101	-1.19109	0.132459	-8.9921	2.42542e-19	3.49563e-18
2009-09-01	ENSG00000184640.13	protein_coding	2995.01	0.488491	0.0543345	8.99045	2.46231e-19	3.54569e-18
SLC25A23	ENSG00000125648.10	protein_coding	2098.91	-0.593829	0.0660857	-8.98574	2.5701e-19	3.69765e-18
FAM149B1	ENSG00000138286.10	protein_coding	509.116	-1.19179	0.132666	-8.98344	2.62425e-19	3.77224e-18
EBP	ENSG00000147155.6	protein_coding	831.4	-0.993753	0.110836	-8.96602	3.07418e-19	4.41513e-18
SEC61G	ENSG00000132432.9	protein_coding	1357.71	0.708061	0.0789899	8.96395	3.13254e-19	4.495e-18
BANK1	ENSG00000153064.7	protein_coding	143.901	-2.58356	0.288525	-8.95436	3.417e-19	4.89462e-18
MAP3K5	ENSG00000197442.8	protein_coding	241.467	1.74849	0.195267	8.95438	3.41665e-19	4.89462e-18
PIAS3	ENSG00000131788.11	protein_coding	706.1	0.994651	0.111141	8.94948	3.57156e-19	5.11155e-18
SZRD1	ENSG00000055070.12	protein_coding	2258.56	-0.581731	0.0650055	-8.94896	3.58848e-19	5.13128e-18
NASP	ENSG00000132780.12	protein_coding	1334.01	-0.739834	0.0828165	-8.93342	4.13051e-19	5.90119e-18
FAU	ENSG00000149806.6	protein_coding	2525.17	0.52752	0.0590521	8.93313	4.14126e-19	5.91139e-18
ABRACL	ENSG00000146386.7	protein_coding	383.698	-1.37088	0.153603	-8.92484	4.46359e-19	6.36595e-18
STK17A	ENSG00000164543.5	protein_coding	887.841	0.876389	0.0982414	8.92076	4.63088e-19	6.59881e-18
APCDD1L-AS1	ENSG00000231290.1	processed_transcript	50.7691	4.50317	0.504962	8.91785	4.75441e-19	6.76894e-18
HIST1H1C	ENSG00000187837.2	protein_coding	425.836	1.25837	0.141144	8.91552	4.8555e-19	6.90687e-18
CNOT8	ENSG00000155508.9	protein_coding	958.899	0.833925	0.0935475	8.91446	4.90197e-19	6.96693e-18
MAP7D3	ENSG00000129680.11	protein_coding	859.877	-0.913939	0.10266	-8.90259	5.45574e-19	7.74724e-18
ATF7IP	ENSG00000171681.8	protein_coding	598.068	1.10031	0.12365	8.89858	5.65679e-19	8.02579e-18
CYLD	ENSG00000083799.13	protein_coding	517.39	-1.21747	0.136861	-8.89562	5.8094e-19	8.23517e-18
CPA4	ENSG00000128510.6	protein_coding	154.393	-2.399	0.269687	-8.8955	5.81586e-19	8.23721e-18
MIF	ENSG00000240972.1	protein_coding	1029.82	0.803426	0.090337	8.89366	5.91272e-19	8.36717e-18
ZNF467	ENSG00000181444.8	protein_coding	52.7454	4.31317	0.485308	8.88748	6.25087e-19	8.83805e-18
APP	ENSG00000142192.16	protein_coding	17733.5	-0.215054	0.024202	-8.88583	6.34442e-19	8.96259e-18
COPRS	ENSG00000172301.6	protein_coding	823.026	-0.921513	0.103845	-8.87392	7.0615e-19	9.967e-18
MT-TP	ENSG00000210196.2	Mt_tRNA	764.576	0.976476	0.110072	8.87125	7.23275e-19	1.01999e-17
RPS29	ENSG00000213741.4	protein_coding	5270.01	0.361981	0.0408161	8.86859	7.40767e-19	1.04376e-17
NIPBL	ENSG00000164190.12	protein_coding	869.02	0.884077	0.0997213	8.86548	7.61755e-19	1.07241e-17
GRN	ENSG00000030582.12	protein_coding	5857.84	0.346494	0.0391245	8.85621	8.27827e-19	1.16443e-17
UBE2R2	ENSG00000107341.4	protein_coding	1578.93	0.671253	0.0758121	8.85416	8.43166e-19	1.18499e-17
C17orf76-AS1	ENSG00000175061.13	processed_transcript	7401.92	0.305868	0.0345925	8.84202	9.40067e-19	1.32004e-17
FAM168A	ENSG00000054965.6	protein_coding	777.56	0.920535	0.104143	8.83919	9.64193e-19	1.35276e-17
GNPNAT1	ENSG00000100522.4	protein_coding	1450.59	0.749075	0.084811	8.83228	1.02564e-18	1.43773e-17
L1CAM	ENSG00000198910.8	protein_coding	424.685	-1.29833	0.147038	-8.82988	1.04792e-18	1.46772e-17
SPRED1	ENSG00000166068.8	protein_coding	519.767	1.133	0.128366	8.82631	1.08186e-18	1.51396e-17
TRA2B	ENSG00000136527.13	protein_coding	1437.11	-0.706145	0.0800359	-8.82286	1.11577e-18	1.56008e-17
SH3BGRL3	ENSG00000142669.9	protein_coding	5249.15	0.360652	0.040944	8.8084	1.2694e-18	1.77337e-17
AC104135.4	ENSG00000230836.1	lincRNA	94.2602	-3.13058	0.355587	-8.80396	1.32073e-18	1.84352e-17
GCNT2	ENSG00000111846.11	protein_coding	1391.12	-0.743507	0.0844629	-8.80276	1.33487e-18	1.86166e-17
PPM1G	ENSG00000115241.9	protein_coding	2024.82	-0.574655	0.0653668	-8.79124	1.47924e-18	2.06124e-17
PM20D2	ENSG00000146281.5	protein_coding	249.389	-1.92781	0.219357	-8.78846	1.51618e-18	2.11093e-17
LRP8	ENSG00000157193.10	protein_coding	440.352	-1.2837	0.14623	-8.77858	1.65556e-18	2.30302e-17
ANKRD37	ENSG00000186352.4	protein_coding	258.805	1.64003	0.186862	8.77671	1.68323e-18	2.33953e-17
DLG4	ENSG00000132535.14	protein_coding	315.652	1.50035	0.170951	8.77651	1.68624e-18	2.34173e-17
KMT2A	ENSG00000118058.16	protein_coding	941.164	0.881249	0.100424	8.77526	1.70516e-18	2.366e-17
ACSS2	ENSG00000131069.15	protein_coding	1720.53	-0.64581	0.0736357	-8.77034	1.78132e-18	2.46908e-17
PRCP	ENSG00000137509.6	protein_coding	1309.84	-0.720375	0.0821383	-8.77027	1.78246e-18	2.46908e-17
SLCO4C1	ENSG00000173930.8	protein_coding	83.9615	-3.43186	0.391326	-8.76983	1.78937e-18	2.47655e-17
RNF24	ENSG00000101236.12	protein_coding	582.832	1.05325	0.120103	8.76959	1.79326e-18	2.47984e-17
ARHGEF18	ENSG00000104880.13	protein_coding	784.596	-0.942865	0.107545	-8.76717	1.83213e-18	2.52933e-17
PGAM1	ENSG00000171314.8	protein_coding	4455.3	0.41722	0.0475889	8.76718	1.83203e-18	2.52933e-17
PSEN2	ENSG00000143801.12	protein_coding	511.959	-1.19767	0.136735	-8.75904	1.96918e-18	2.71396e-17
MAGEF1	ENSG00000177383.3	protein_coding	324.684	-1.46982	0.167805	-8.75912	1.96783e-18	2.71396e-17
ST3GAL6	ENSG00000064225.8	protein_coding	487.231	-1.19922	0.136953	-8.75647	2.01463e-18	2.77427e-17
BMPR2	ENSG00000204217.8	protein_coding	536.707	1.10413	0.126221	8.74755	2.18038e-18	2.99999e-17
WWC3	ENSG00000047644.13	protein_coding	914.583	-0.88096	0.100768	-8.74244	2.28135e-18	3.13629e-17
TTC9	ENSG00000133985.2	protein_coding	432.046	-1.28334	0.146852	-8.73898	2.35231e-18	3.23112e-17
AC005077.14	ENSG00000230882.1	pseudogene	127.332	2.32663	0.266254	8.73839	2.36459e-18	3.24527e-17
RSL1D1	ENSG00000171490.8	protein_coding	2958.88	0.47954	0.054898	8.73511	2.43417e-18	3.33797e-17
UAP1L1	ENSG00000197355.6	protein_coding	436.488	-1.25265	0.143419	-8.73421	2.45357e-18	3.36176e-17
LRP5	ENSG00000162337.7	protein_coding	1807.44	0.601468	0.0688665	8.73382	2.46221e-18	3.37077e-17
KPNA2	ENSG00000182481.4	protein_coding	1711.24	-0.662907	0.0759708	-8.72581	2.64275e-18	3.61492e-17
GCC2	ENSG00000135968.15	protein_coding	360.18	1.36582	0.156863	8.70709	3.11764e-18	4.26094e-17
PTRF	ENSG00000177469.12	protein_coding	4269.55	-0.401092	0.0460858	-8.70316	3.22756e-18	4.4075e-17
BRWD1	ENSG00000185658.9	protein_coding	592.02	1.08543	0.124748	8.701	3.28983e-18	4.48879e-17
CTNS	ENSG00000040531.10	protein_coding	332.337	-1.44896	0.166544	-8.70015	3.31458e-18	4.51881e-17
PRDX6	ENSG00000117592.8	protein_coding	3260.81	0.465456	0.0535127	8.69806	3.37611e-18	4.59886e-17
MT-ND2	ENSG00000198763.3	protein_coding	33900.7	0.158779	0.0182751	8.68831	3.67873e-18	5.00692e-17
NXN	ENSG00000167693.12	protein_coding	586.262	-1.0784	0.124208	-8.6822	3.88183e-18	5.27897e-17
NSMAF	ENSG00000035681.3	protein_coding	729.122	-0.962106	0.110816	-8.68204	3.88728e-18	5.28199e-17
DNAH2	ENSG00000183914.10	protein_coding	180.338	-2.19722	0.253102	-8.68114	3.91811e-18	5.31947e-17
MCM6	ENSG00000076003.4	protein_coding	386.191	-1.32376	0.152537	-8.67833	4.01611e-18	5.44801e-17
BCL3	ENSG00000069399.8	protein_coding	316.624	1.42196	0.163872	8.6773	4.05287e-18	5.49334e-17
ABCA6	ENSG00000154262.8	protein_coding	41.8547	5.12037	0.590588	8.66995	4.32296e-18	5.85457e-17
FZD4	ENSG00000174804.3	protein_coding	564.153	-1.14372	0.131977	-8.66605	4.47371e-18	6.05373e-17
FIBCD1	ENSG00000130720.8	protein_coding	197.312	1.82833	0.211016	8.66441	4.53877e-18	6.1367e-17
PORCN	ENSG00000102312.16	protein_coding	549.402	1.07325	0.12406	8.65106	5.10252e-18	6.89324e-17
PRKCE	ENSG00000171132.9	protein_coding	269.009	-1.7332	0.200356	-8.65061	5.12238e-18	6.91437e-17
STT3B	ENSG00000163527.5	protein_coding	3422.56	0.442415	0.0511975	8.64134	5.55569e-18	7.4931e-17
HSD17B12	ENSG00000149084.7	protein_coding	1500.1	-0.722473	0.0836079	-8.64121	5.5623e-18	7.49584e-17
NFE2L3	ENSG00000050344.8	protein_coding	528.996	-1.11869	0.129568	-8.63399	5.92458e-18	7.9775e-17
B3GALTL	ENSG00000187676.7	protein_coding	226.511	-1.84086	0.213532	-8.621	6.63725e-18	8.92977e-17
PML	ENSG00000140464.15	protein_coding	608.118	1.02748	0.119286	8.61356	7.08238e-18	9.52083e-17
ZDHHC7	ENSG00000153786.8	protein_coding	2169.3	-0.546691	0.0634996	-8.60935	7.34742e-18	9.86904e-17
SCAF11	ENSG00000139218.13	protein_coding	859.352	0.875949	0.101756	8.60831	7.41441e-18	9.95086e-17
TRIM8	ENSG00000171206.9	protein_coding	2546.23	-0.501818	0.0583493	-8.60024	7.95467e-18	1.06672e-16
PRKCD	ENSG00000163932.9	protein_coding	902.367	0.829312	0.0964314	8.60003	7.9697e-18	1.06786e-16
NAP1L1	ENSG00000187109.9	protein_coding	13077.9	0.227371	0.0264498	8.59632	8.231e-18	1.10197e-16
EPG5	ENSG00000152223.8	protein_coding	631.327	-1.01732	0.118448	-8.58874	8.79316e-18	1.17627e-16
TMC8	ENSG00000167895.10	protein_coding	60.5576	-4.62349	0.538461	-8.58649	8.9667e-18	1.19851e-16
MCM4	ENSG00000104738.12	protein_coding	796.057	-0.965713	0.112545	-8.58069	9.43041e-18	1.25946e-16
PLEKHB2	ENSG00000115762.12	protein_coding	1711.56	-0.659787	0.076927	-8.57679	9.75539e-18	1.3018e-16
SET	ENSG00000119335.12	protein_coding	6017.87	-0.332295	0.0387826	-8.56813	1.05177e-17	1.40238e-16
MBP	ENSG00000197971.10	protein_coding	1005.4	-0.825732	0.0963765	-8.56778	1.05498e-17	1.40552e-16
PVRL2	ENSG00000130202.5	protein_coding	1445.84	0.684201	0.0799099	8.56216	1.10775e-17	1.47463e-16
RNF213	ENSG00000173821.15	protein_coding	1186.39	0.77867	0.090955	8.56104	1.11853e-17	1.48777e-16
RP11-624G17.3	ENSG00000255301.1	antisense	90.8995	2.73096	0.319027	8.56028	1.12598e-17	1.49646e-16
CKS1B	ENSG00000173207.8	protein_coding	796.204	-0.919318	0.107421	-8.5581	1.14742e-17	1.52373e-16
FAM49B	ENSG00000153310.14	protein_coding	1693.3	-0.610909	0.0714124	-8.55466	1.18216e-17	1.56859e-16
OXTR	ENSG00000180914.6	protein_coding	90.8041	-3.06699	0.358606	-8.55254	1.20411e-17	1.59642e-16
PPIF	ENSG00000108179.9	protein_coding	1204.1	-0.765036	0.0894766	-8.55013	1.22955e-17	1.62883e-16
FRAS1	ENSG00000138759.13	protein_coding	342.617	-1.40198	0.164027	-8.54726	1.26042e-17	1.66837e-16
THEMIS2	ENSG00000130775.11	protein_coding	147.179	2.1002	0.245771	8.54532	1.28179e-17	1.6953e-16
MECOM	ENSG00000085276.13	protein_coding	354.981	-1.46777	0.171793	-8.54388	1.29791e-17	1.71524e-16
BMP6	ENSG00000153162.8	protein_coding	95.3532	2.89711	0.339177	8.54159	1.32391e-17	1.74817e-16
TLE3	ENSG00000140332.11	protein_coding	501.459	1.1836	0.138683	8.53458	1.40662e-17	1.8559e-16
RP11-301G19.1	ENSG00000227706.3	lincRNA	247.602	-1.70968	0.200362	-8.53297	1.42633e-17	1.8804e-16
YWHAH	ENSG00000128245.10	protein_coding	1061.64	-0.784229	0.0919231	-8.53136	1.44639e-17	1.9053e-16
OST4	ENSG00000228474.1	protein_coding	1346.72	0.68711	0.0805515	8.53007	1.46265e-17	1.92518e-16
CD81	ENSG00000110651.7	protein_coding	2542.76	0.544379	0.0638793	8.522	1.56817e-17	2.06241e-16
DGAT2	ENSG00000062282.10	protein_coding	280.922	1.51619	0.17799	8.51839	1.61786e-17	2.12605e-16
ZC3H11A	ENSG00000058673.11	protein_coding	2727.28	0.49199	0.0577621	8.51752	1.63004e-17	2.13931e-16
ADCY3	ENSG00000138031.10	protein_coding	321.544	-1.46563	0.172073	-8.51748	1.63056e-17	2.13931e-16
CD177	ENSG00000204936.5	polymorphic_pseudogene	62.5145	-4.31368	0.50647	-8.51715	1.63527e-17	2.14378e-16
BIRC5	ENSG00000089685.10	protein_coding	358.938	-1.39069	0.163326	-8.5148	1.66876e-17	2.18593e-16
WWTR1	ENSG00000018408.10	protein_coding	1033.12	0.790915	0.0928934	8.51422	1.67717e-17	2.1952e-16
STK38	ENSG00000112079.8	protein_coding	2221.55	-0.531647	0.0625623	-8.49788	1.93077e-17	2.5251e-16
LIMCH1	ENSG00000064042.13	protein_coding	991.109	-0.834049	0.0981576	-8.49704	1.94492e-17	2.54158e-16
SSR4	ENSG00000180879.9	protein_coding	1397.66	0.672027	0.0791008	8.49583	1.96529e-17	2.56615e-16
INSC	ENSG00000188487.7	protein_coding	41.543	4.88047	0.574478	8.4955	1.97087e-17	2.57139e-16
SLC2A6	ENSG00000160326.9	protein_coding	220.871	-1.77478	0.208992	-8.49209	2.0296e-17	2.64591e-16
GHITM	ENSG00000165678.15	protein_coding	2793.61	-0.477849	0.0563035	-8.48702	2.12006e-17	2.76164e-16
MTR	ENSG00000116984.8	protein_coding	642.28	0.991511	0.116835	8.48644	2.13063e-17	2.7732e-16
TPCN1	ENSG00000186815.8	protein_coding	1017.74	0.827055	0.097467	8.48549	2.14816e-17	2.7938e-16
KANK1	ENSG00000107104.14	protein_coding	202.976	-1.90267	0.224255	-8.48438	2.16872e-17	2.81831e-16
NOTCH2NL	ENSG00000213240.7	protein_coding	151.072	2.19935	0.25926	8.48319	2.19101e-17	2.84501e-16
PLEKHA6	ENSG00000143850.8	protein_coding	145.766	-2.24252	0.264468	-8.47935	2.2645e-17	2.93811e-16
F3	ENSG00000117525.9	protein_coding	2151.72	0.548979	0.0648505	8.4653	2.55496e-17	3.31235e-16
TACC3	ENSG00000013810.14	protein_coding	328.068	-1.45079	0.171412	-8.46375	2.58924e-17	3.35414e-16
RFC2	ENSG00000049541.6	protein_coding	319.889	-1.43053	0.169031	-8.46308	2.60402e-17	3.37062e-16
ATRAID	ENSG00000138085.12	protein_coding	1258.12	0.717744	0.0848151	8.46245	2.61821e-17	3.38631e-16
GOLGA4	ENSG00000144674.12	protein_coding	2946.44	0.475043	0.0561675	8.45761	2.72906e-17	3.5269e-16
H2AFY	ENSG00000113648.12	protein_coding	2068.93	-0.554404	0.0655926	-8.45223	2.85799e-17	3.69061e-16
HLA-DMB	ENSG00000242574.4	protein_coding	60.5833	3.46203	0.409856	8.44694	2.99028e-17	3.85841e-16
RIN1	ENSG00000174791.6	protein_coding	267.562	1.51214	0.179084	8.44377	3.07269e-17	3.96162e-16
NFIC	ENSG00000141905.13	protein_coding	1388.92	0.671723	0.079563	8.44266	3.10199e-17	3.99625e-16
CALCOCO2	ENSG00000136436.10	protein_coding	1581.89	0.631551	0.0748147	8.44154	3.13183e-17	4.02842e-16
HKDC1	ENSG00000156510.11	protein_coding	74.3027	-3.54318	0.419731	-8.44154	3.13188e-17	4.02842e-16
PPT1	ENSG00000131238.12	protein_coding	1568.38	-0.647688	0.0767574	-8.43811	3.22508e-17	4.14505e-16
SGPP2	ENSG00000163082.9	protein_coding	50.9693	4.02412	0.47703	8.43577	3.29031e-17	4.22557e-16
COL12A1	ENSG00000111799.16	protein_coding	875.497	-0.846207	0.100352	-8.43236	3.38761e-17	4.34712e-16
RIF1	ENSG00000080345.13	protein_coding	608.754	0.991611	0.117685	8.42595	3.57848e-17	4.58846e-16
COL13A1	ENSG00000197467.9	protein_coding	1202.04	-0.720229	0.0855337	-8.42041	3.75159e-17	4.80668e-16
RP11-983P16.4	ENSG00000257337.2	antisense	932.064	0.805359	0.0956717	8.41794	3.8317e-17	4.90548e-16
BCL2L1	ENSG00000171552.8	protein_coding	7792.8	0.289375	0.0344094	8.40977	4.1081e-17	5.25523e-16
TOB1	ENSG00000141232.4	protein_coding	494.526	-1.14571	0.136274	-8.40741	4.19174e-17	5.35804e-16
SH3PXD2B	ENSG00000174705.7	protein_coding	162.451	1.96229	0.233479	8.40458	4.294e-17	5.48448e-16
LPP	ENSG00000145012.8	protein_coding	753.982	0.893747	0.106402	8.3997	4.47612e-17	5.71263e-16
ANKRD12	ENSG00000101745.11	protein_coding	715.583	0.943203	0.1123	8.39893	4.50583e-17	5.74607e-16
THSD4	ENSG00000187720.10	protein_coding	780.767	0.906172	0.107993	8.39102	4.81951e-17	6.14132e-16
ANK1	ENSG00000029534.15	protein_coding	205.883	-1.81468	0.216293	-8.38989	4.86581e-17	6.19549e-16
2006-03-01	ENSG00000145495.10	protein_coding	1534.59	0.630976	0.0752229	8.38809	4.94096e-17	6.28629e-16
SCP2	ENSG00000116171.12	protein_coding	1256.61	-0.712335	0.0849309	-8.38723	4.97721e-17	6.3275e-16
SEC24A	ENSG00000113615.8	protein_coding	475.873	1.12085	0.133697	8.38353	5.13636e-17	6.52477e-16
C3orf58	ENSG00000181744.4	protein_coding	228.627	1.62215	0.193505	8.383	5.15957e-17	6.54918e-16
PDK4	ENSG00000004799.7	protein_coding	77.0298	2.95905	0.353185	8.37817	5.37564e-17	6.81816e-16
TROVE2	ENSG00000116747.8	protein_coding	667.006	0.969276	0.115766	8.37274	5.62918e-17	7.13421e-16
NUSAP1	ENSG00000137804.8	protein_coding	469.435	-1.16348	0.139018	-8.36927	5.79776e-17	7.34218e-16
GMPR	ENSG00000137198.5	protein_coding	245.677	-1.65985	0.198384	-8.36686	5.91715e-17	7.4876e-16
BMP1	ENSG00000168487.13	protein_coding	489.756	1.09177	0.130528	8.36426	6.04946e-17	7.64911e-16
LMBR1	ENSG00000105983.15	protein_coding	626.201	1.01559	0.121425	8.36395	6.06522e-17	7.66312e-16
FBLN5	ENSG00000140092.10	protein_coding	193.224	4.30293	0.514626	8.36128	6.20398e-17	7.8324e-16
NPC2	ENSG00000119655.4	protein_coding	3227.45	-0.434667	0.0520026	-8.35858	6.34792e-17	8.00796e-16
ABCG2	ENSG00000118777.6	protein_coding	61.1757	-4.13569	0.495033	-8.35437	6.57838e-17	8.29231e-16
PAPLN	ENSG00000100767.11	protein_coding	54.7363	3.70286	0.443751	8.34447	7.15334e-17	9.01013e-16
BCAM	ENSG00000187244.6	protein_coding	327.057	1.34071	0.160798	8.33783	7.56649e-17	9.5232e-16
SETD2	ENSG00000181555.15	protein_coding	1186.09	0.743764	0.0892097	8.33726	7.6031e-17	9.56193e-16
CLPTM1L	ENSG00000049656.9	protein_coding	2051.91	-0.584	0.0700663	-8.33496	7.75223e-17	9.74201e-16
CLTA	ENSG00000122705.12	protein_coding	3024.16	-0.469692	0.0563725	-8.33194	7.95308e-17	9.98675e-16
DCBLD2	ENSG00000057019.11	protein_coding	3037.64	-0.464454	0.0557544	-8.33035	8.06046e-17	1.01138e-15
ADI1	ENSG00000182551.9	protein_coding	1811.6	-0.595931	0.0715421	-8.32979	8.09835e-17	1.01536e-15
CH25H	ENSG00000138135.5	protein_coding	42.6222	4.54479	0.545743	8.3277	8.24265e-17	1.03266e-15
CEP55	ENSG00000138180.11	protein_coding	423.4	-1.25534	0.150797	-8.3247	8.45421e-17	1.05836e-15
MTHFD1	ENSG00000100714.11	protein_coding	1923.57	-0.66764	0.0802305	-8.32153	8.68361e-17	1.08625e-15
KIF5B	ENSG00000170759.10	protein_coding	2740.23	0.469946	0.056484	8.31998	8.7976e-17	1.09967e-15
RPL21	ENSG00000122026.6	protein_coding	4807.73	0.355643	0.042823	8.30496	9.98509e-17	1.24715e-15
WASF2	ENSG00000158195.6	protein_coding	2030.3	0.540938	0.0651437	8.30377	1.00858e-16	1.25877e-15
CCNB1	ENSG00000134057.10	protein_coding	717.054	-0.925042	0.111413	-8.30279	1.01699e-16	1.26829e-15
CLSPN	ENSG00000092853.9	protein_coding	202.074	-1.85369	0.223303	-8.30125	1.03021e-16	1.2838e-15
RRM1	ENSG00000167325.10	protein_coding	760.108	-0.912758	0.109996	-8.29807	1.05819e-16	1.31667e-15
JMJD1C	ENSG00000171988.13	protein_coding	1080.31	0.768951	0.0926658	8.29811	1.05782e-16	1.31667e-15
SZT2	ENSG00000198198.9	protein_coding	653.45	-0.970866	0.117089	-8.29173	1.11614e-16	1.38772e-15
ALG1	ENSG00000033011.7	protein_coding	349.058	-1.35467	0.163604	-8.28018	1.22986e-16	1.52796e-15
NFKBIZ	ENSG00000144802.7	protein_coding	203.892	1.6904	0.204191	8.27854	1.24692e-16	1.54798e-15
GPX8	ENSG00000164294.9	protein_coding	763.008	-0.941058	0.11371	-8.27596	1.27421e-16	1.58066e-15
LDHAP7	ENSG00000235847.2	pseudogene	92.6282	2.61176	0.315636	8.2746	1.28885e-16	1.59761e-15
XXbac-BPG248L24.12	ENSG00000271581.1	pseudogene	187.872	1.83027	0.221263	8.27192	1.3182e-16	1.63276e-15
ARL4A	ENSG00000122644.8	protein_coding	456.495	1.12435	0.13593	8.27151	1.32268e-16	1.63707e-15
PSG1	ENSG00000231924.5	protein_coding	52.0926	-4.85616	0.587606	-8.26431	1.4051e-16	1.73777e-15
LTBP4	ENSG00000090006.13	protein_coding	783.093	0.906796	0.109773	8.26068	1.44849e-16	1.79008e-15
RBBP8	ENSG00000101773.12	protein_coding	506.832	-1.09314	0.132366	-8.25851	1.47505e-16	1.82153e-15
JDP2	ENSG00000140044.8	protein_coding	283.443	-1.69848	0.2057	-8.25708	1.49274e-16	1.84199e-15
ORC1	ENSG00000085840.8	protein_coding	95.2585	-2.80631	0.339992	-8.25405	1.53119e-16	1.888e-15
MANBA	ENSG00000109323.4	protein_coding	268.978	1.4974	0.181486	8.25079	1.57349e-16	1.93832e-15
RPS26	ENSG00000197728.5	protein_coding	2255.63	0.563971	0.0683541	8.25073	1.57436e-16	1.93832e-15
HOOK2	ENSG00000095066.7	protein_coding	402.585	1.23368	0.149565	8.24841	1.60519e-16	1.97479e-15
LMNB1	ENSG00000113368.7	protein_coding	459.207	-1.18404	0.143607	-8.24503	1.65119e-16	2.02987e-15
MID1	ENSG00000101871.10	protein_coding	397.98	-1.25345	0.152087	-8.24167	1.6983e-16	2.0862e-15
TMEM132A	ENSG00000006118.10	protein_coding	508.385	1.0889	0.132442	8.22176	2.00545e-16	2.46168e-15
CUTA	ENSG00000112514.11	protein_coding	2980.85	-0.442953	0.0538798	-8.22114	2.01584e-16	2.47257e-15
MYL9	ENSG00000101335.5	protein_coding	966.144	-0.79606	0.0968402	-8.22034	2.02921e-16	2.48711e-15
AC007879.7	ENSG00000229647.1	lincRNA	38.1891	4.75378	0.578322	8.21995	2.03595e-16	2.49351e-15
SUN2	ENSG00000100242.11	protein_coding	803.057	0.886549	0.107864	8.21913	2.04993e-16	2.50875e-15
PTPRE	ENSG00000132334.12	protein_coding	266.67	1.46033	0.177711	8.21746	2.07867e-16	2.54203e-15
CPVL	ENSG00000106066.9	protein_coding	530.445	1.04177	0.126839	8.21334	2.15125e-16	2.62882e-15
OPHN1	ENSG00000079482.11	protein_coding	478.44	-1.11559	0.135885	-8.20986	2.21452e-16	2.70413e-15
CLDND1	ENSG00000080822.12	protein_coding	1132.91	0.721432	0.0878871	8.20862	2.23751e-16	2.73016e-15
PIK3R1	ENSG00000145675.10	protein_coding	339.129	1.35459	0.16508	8.20562	2.29403e-16	2.79704e-15
VEGFC	ENSG00000150630.2	protein_coding	1317.71	-0.665503	0.0811148	-8.20445	2.31643e-16	2.82225e-15
AC007319.1	ENSG00000224063.1	antisense	140.228	2.0414	0.248854	8.20322	2.3403e-16	2.84922e-15
CHD3	ENSG00000170004.12	protein_coding	2009.19	0.534747	0.0652701	8.19284	2.55143e-16	3.10396e-15
HNRNPDL	ENSG00000152795.13	protein_coding	2494.45	-0.490989	0.0599532	-8.18954	2.62217e-16	3.18764e-15
C1orf198	ENSG00000119280.12	protein_coding	490.102	-1.2028	0.147189	-8.17184	3.03718e-16	3.68942e-15
KLF4	ENSG00000136826.10	protein_coding	792.953	0.859759	0.105265	8.1676	3.14597e-16	3.81874e-15
CHD2	ENSG00000173575.14	protein_coding	1528.67	0.618572	0.0758759	8.15242	3.56722e-16	4.32687e-15
SPIRE1	ENSG00000134278.10	protein_coding	1918.98	-0.55143	0.0676456	-8.15175	3.58694e-16	4.34757e-15
UCP2	ENSG00000175567.4	protein_coding	239.338	-1.61077	0.197612	-8.15115	3.60482e-16	4.36602e-15
SOAT1	ENSG00000057252.8	protein_coding	1395.42	-0.643867	0.0790134	-8.14883	3.6746e-16	4.44724e-15
ARHGEF39	ENSG00000137135.13	protein_coding	426.983	1.19182	0.146378	8.14207	3.88571e-16	4.69927e-15
SLC25A5	ENSG00000005022.5	protein_coding	4083.65	-0.384176	0.0472617	-8.12871	4.3387e-16	5.24324e-15
FAM65A	ENSG00000039523.13	protein_coding	2029.23	-0.535429	0.0659353	-8.12052	4.64175e-16	5.60534e-15
MORF4L1	ENSG00000185787.10	protein_coding	3297.25	0.417541	0.0514285	8.11887	4.70556e-16	5.67821e-15
FLOT1	ENSG00000137312.10	protein_coding	2274.13	0.542884	0.0668967	8.11527	4.84703e-16	5.84461e-15
IL18	ENSG00000150782.7	protein_coding	170.938	-1.92522	0.237267	-8.11415	4.89216e-16	5.89469e-15
INSIG2	ENSG00000125629.10	protein_coding	534.65	1.02766	0.126796	8.10481	5.28287e-16	6.36079e-15
RP11-342D11.2	ENSG00000238258.1	antisense	407.27	1.21293	0.149868	8.09328	5.80791e-16	6.98783e-15
FYN	ENSG00000010810.13	protein_coding	698.065	-0.911082	0.11261	-8.09056	5.93904e-16	7.14035e-15
KCNAB2	ENSG00000069424.10	protein_coding	181.546	-1.83987	0.22765	-8.082	6.3713e-16	7.65444e-15
RPS9	ENSG00000170889.9	protein_coding	3696.17	0.392983	0.048634	8.08041	6.45518e-16	7.74952e-15
CD44	ENSG00000026508.12	protein_coding	6285.85	0.300393	0.0371788	8.07967	6.49414e-16	7.78375e-15
BTBD2	ENSG00000133243.4	protein_coding	1191.36	0.692805	0.0857463	8.07971	6.49201e-16	7.78375e-15
DBI	ENSG00000155368.12	protein_coding	1236.05	-0.766498	0.0948683	-8.0796	6.49793e-16	7.78375e-15
DDOST	ENSG00000244038.5	protein_coding	3198.04	0.430517	0.0532893	8.07888	6.53655e-16	7.82429e-15
CTD-2033A16.1	ENSG00000261602.1	antisense	171.877	-1.9437	0.240806	-8.07163	6.93658e-16	8.29706e-15
SLPI	ENSG00000124107.5	protein_coding	36.1278	4.86464	0.602819	8.06981	7.04053e-16	8.41526e-15
CRYBG3	ENSG00000233280.2	protein_coding	80.0711	2.82585	0.35033	8.06625	7.24904e-16	8.65817e-15
REEP5	ENSG00000129625.8	protein_coding	2348.8	-0.493933	0.0612396	-8.06558	7.28876e-16	8.69926e-15
KRT18	ENSG00000111057.6	protein_coding	2875.15	-0.447984	0.0556363	-8.05201	8.1444e-16	9.71341e-15
AQP3	ENSG00000165272.10	protein_coding	194.175	1.74798	0.21759	8.03336	9.48376e-16	1.13026e-14
OBFC1	ENSG00000107960.6	protein_coding	494.687	1.05536	0.131405	8.03134	9.64109e-16	1.14817e-14
FAM13A-AS1	ENSG00000248019.2	antisense	129.089	2.13827	0.266277	8.03024	9.72796e-16	1.15768e-14
HPSE	ENSG00000173083.10	protein_coding	93.4152	-2.78131	0.3464	-8.02918	9.81299e-16	1.16695e-14
TMED10	ENSG00000170348.4	protein_coding	4354.55	0.395779	0.0493305	8.023	1.03192e-15	1.22626e-14
RPS15	ENSG00000115268.5	protein_coding	3822.42	0.390994	0.0487421	8.0217	1.04289e-15	1.23839e-14
TOMM20	ENSG00000173726.6	protein_coding	4140.36	0.365497	0.0455793	8.01892	1.0668e-15	1.26586e-14
ARMC6	ENSG00000105676.9	protein_coding	504.594	-1.11626	0.13923	-8.01735	1.08053e-15	1.28123e-14
PRC1	ENSG00000198901.9	protein_coding	649.413	-0.99464	0.124106	-8.01444	1.10639e-15	1.31094e-14
NAB2	ENSG00000166886.8	protein_coding	312.249	1.37868	0.172075	8.01208	1.12787e-15	1.33543e-14
RPS21	ENSG00000171858.13	protein_coding	4820.01	0.371642	0.0464412	8.00242	1.22001e-15	1.44349e-14
AC012613.2	ENSG00000253406.1	antisense	93.4198	2.56325	0.320479	7.99817	1.2628e-15	1.49303e-14
PGM2L1	ENSG00000165434.6	protein_coding	217.941	1.62008	0.202612	7.99596	1.28573e-15	1.51905e-14
RAPH1	ENSG00000173166.13	protein_coding	821.747	0.811998	0.101587	7.99316	1.31524e-15	1.5528e-14
ZBTB16	ENSG00000109906.9	protein_coding	32.241	5.00896	0.627509	7.9823	1.43634e-15	1.69455e-14
XRCC3	ENSG00000126215.9	protein_coding	238.037	-1.57988	0.197952	-7.98115	1.44972e-15	1.70911e-14
RCL1	ENSG00000120158.7	protein_coding	198.169	1.77774	0.222826	7.97816	1.48527e-15	1.74976e-14
DSP	ENSG00000096696.9	protein_coding	3239.88	0.457911	0.0574164	7.97527	1.52052e-15	1.78999e-14
ACTR2	ENSG00000138071.9	protein_coding	3281.8	0.40813	0.0511825	7.97401	1.53604e-15	1.80697e-14
DNAJC3	ENSG00000102580.10	protein_coding	1114.11	0.698705	0.0876319	7.97318	1.54643e-15	1.81788e-14
TM4SF19-AS1	ENSG00000235897.1	antisense	201.84	-1.72486	0.216375	-7.97163	1.5659e-15	1.83945e-14
NUMB	ENSG00000133961.15	protein_coding	1589.03	0.609219	0.076529	7.96062	1.71174e-15	2.00933e-14
RALA	ENSG00000006451.3	protein_coding	766.304	-0.853902	0.10733	-7.95583	1.77936e-15	2.08721e-14
SERTAD1	ENSG00000197019.4	protein_coding	292.358	1.34827	0.169616	7.94897	1.88071e-15	2.20452e-14
TMEM158	ENSG00000249992.1	protein_coding	466.215	1.08206	0.136143	7.94801	1.89538e-15	2.22012e-14
RASGRF1	ENSG00000058335.11	protein_coding	96.6743	-2.72702	0.3432	-7.94586	1.92853e-15	2.25735e-14
AGFG2	ENSG00000106351.8	protein_coding	534.039	-1.03356	0.13012	-7.94315	1.97116e-15	2.3056e-14
PLCE1	ENSG00000138193.10	protein_coding	266.226	-1.47133	0.18527	-7.94151	1.9973e-15	2.3345e-14
GNG5	ENSG00000174021.6	protein_coding	1664.02	0.568307	0.071621	7.93492	2.10636e-15	2.46022e-14
PSG9	ENSG00000183668.13	protein_coding	366.289	-4.32383	0.544984	-7.93387	2.12426e-15	2.47936e-14
TNFSF9	ENSG00000125657.3	protein_coding	261.513	-1.48166	0.186891	-7.92792	2.22842e-15	2.59908e-14
C16orf80	ENSG00000070761.3	protein_coding	624.37	-0.952126	0.120119	-7.92654	2.25332e-15	2.62625e-14
TMCC3	ENSG00000057704.6	protein_coding	268.47	1.44191	0.182011	7.9221	2.33529e-15	2.71986e-14
PAQR4	ENSG00000162073.9	protein_coding	191.801	-1.75939	0.222187	-7.9185	2.40384e-15	2.79771e-14
P4HA2-AS1	ENSG00000237714.1	antisense	108.412	2.2611	0.286218	7.89993	2.79071e-15	3.24566e-14
TNFRSF12A	ENSG00000006327.9	protein_coding	1196.08	-0.671378	0.0850534	-7.8936	2.93593e-15	3.41214e-14
EXO1	ENSG00000174371.12	protein_coding	117.493	-2.32357	0.294401	-7.89252	2.96136e-15	3.43925e-14
GTSE1	ENSG00000075218.14	protein_coding	174.384	-1.9415	0.245998	-7.89233	2.96589e-15	3.44207e-14
MYO1C	ENSG00000197879.10	protein_coding	2862.83	-0.488883	0.0619491	-7.89169	2.98126e-15	3.45747e-14
CYSTM1	ENSG00000120306.5	protein_coding	511.763	-1.03234	0.130852	-7.88937	3.03708e-15	3.51971e-14
ENC1	ENSG00000171617.9	protein_coding	823.114	-0.819014	0.103832	-7.88788	3.07369e-15	3.55961e-14
PPFIA4	ENSG00000143847.11	protein_coding	43.343	3.98168	0.505062	7.88355	3.18201e-15	3.68245e-14
NOG	ENSG00000183691.4	protein_coding	583.667	0.943822	0.11975	7.88162	3.23172e-15	3.73735e-14
PTPRF	ENSG00000142949.12	protein_coding	2064.92	-0.557318	0.0707451	-7.87783	3.33113e-15	3.8496e-14
ELOVL6	ENSG00000170522.5	protein_coding	861.987	-0.804256	0.102209	-7.86873	3.58247e-15	4.13714e-14
AHNAK2	ENSG00000185567.6	protein_coding	1432.26	0.607524	0.0772102	7.86844	3.59087e-15	4.14391e-14
CCNJL	ENSG00000135083.10	protein_coding	623.519	-0.942672	0.119859	-7.86485	3.69542e-15	4.26157e-14
PLK1	ENSG00000166851.10	protein_coding	325.162	-1.31153	0.166781	-7.86382	3.72592e-15	4.29372e-14
PKIG	ENSG00000168734.9	protein_coding	542.173	-1.09555	0.139356	-7.86148	3.79615e-15	4.37157e-14
MYPN	ENSG00000138347.11	protein_coding	48.0155	-4.50096	0.572547	-7.86128	3.80219e-15	4.37546e-14
PPP2R5D	ENSG00000112640.10	protein_coding	2372.52	0.474738	0.0604095	7.85866	3.88261e-15	4.46486e-14
RHOC	ENSG00000155366.12	protein_coding	1147.07	0.675472	0.0859619	7.85781	3.90902e-15	4.49209e-14
PPARGC1A	ENSG00000109819.4	protein_coding	163.023	-1.96772	0.250489	-7.8555	3.98167e-15	4.57237e-14
SNHG16	ENSG00000163597.10	processed_transcript	1297.62	0.668107	0.0850526	7.85522	3.99063e-15	4.57944e-14
AC096559.1	ENSG00000224184.1	lincRNA	32.8399	4.76746	0.607035	7.85368	4.03991e-15	4.63276e-14
CTD-2616J11.9	ENSG00000267984.1	antisense	206.902	1.69485	0.215864	7.8515	4.111e-15	4.71097e-14
RPRD1B	ENSG00000101413.7	protein_coding	764.095	0.939117	0.119627	7.8504	4.14712e-15	4.74573e-14
CAPRIN1	ENSG00000135387.15	protein_coding	3236.73	0.412433	0.0525364	7.85043	4.14629e-15	4.74573e-14
CTDSPL	ENSG00000144677.10	protein_coding	485.914	-1.0631	0.135525	-7.84432	4.35297e-15	4.97781e-14
NCOA3	ENSG00000124151.14	protein_coding	1017.83	0.710574	0.0905863	7.84417	4.3584e-15	4.98056e-14
SLC7A6	ENSG00000103064.9	protein_coding	1111.29	-0.694865	0.0886496	-7.83833	4.5656e-15	5.21369e-14
ABL1	ENSG00000097007.13	protein_coding	1079.89	0.705788	0.0901022	7.83319	4.75633e-15	5.42771e-14
EPHX1	ENSG00000143819.8	protein_coding	553.649	-1.00183	0.127918	-7.83182	4.80868e-15	5.48364e-14
DHX15	ENSG00000109606.8	protein_coding	2115.39	-0.500391	0.063894	-7.83157	4.81813e-15	5.49059e-14
MYCBP2	ENSG00000005810.13	protein_coding	756.896	0.838599	0.107092	7.83062	4.85457e-15	5.52827e-14
BRD2	ENSG00000204256.8	protein_coding	6067.99	0.301427	0.0385001	7.82927	4.90725e-15	5.58438e-14
ARHGEF11	ENSG00000132694.14	protein_coding	619.411	-0.945878	0.120928	-7.82183	5.2061e-15	5.92036e-14
S1PR3	ENSG00000213694.3	protein_coding	105.794	2.26436	0.289508	7.8214	5.2239e-15	5.93648e-14
SFTA1P	ENSG00000225383.2	lincRNA	284.942	-1.3879	0.177537	-7.81756	5.38571e-15	6.11612e-14
UNC119B	ENSG00000175970.7	protein_coding	391.266	1.15639	0.147962	7.81547	5.47574e-15	6.21406e-14
PDLIM7	ENSG00000196923.9	protein_coding	971.32	0.7399	0.0946727	7.81535	5.48123e-15	6.21598e-14
PICALM	ENSG00000073921.13	protein_coding	2574.65	-0.456834	0.0586003	-7.79577	6.40184e-15	7.25498e-14
IL24	ENSG00000162892.11	protein_coding	193.195	-1.7654	0.226639	-7.78949	6.72821e-15	7.61957e-14
LTN1	ENSG00000198862.9	protein_coding	386.1	1.15224	0.147956	7.7877	6.82394e-15	7.72264e-14
LDLRAP1	ENSG00000157978.7	protein_coding	306.784	-1.33212	0.171098	-7.78572	6.93158e-15	7.83904e-14
HPGD	ENSG00000164120.9	protein_coding	123.772	2.14715	0.276171	7.77473	7.56113e-15	8.54513e-14
GALNT11	ENSG00000178234.8	protein_coding	719.726	0.841237	0.108244	7.77169	7.7444e-15	8.74621e-14
RFC4	ENSG00000163918.6	protein_coding	311.789	-1.33233	0.171489	-7.76921	7.89768e-15	8.91317e-14
ZNF841	ENSG00000197608.7	protein_coding	210.674	1.62229	0.208865	7.76716	8.02637e-15	9.05218e-14
RPS23	ENSG00000186468.8	protein_coding	10305.8	0.238666	0.0307363	7.76495	8.16752e-15	9.20503e-14
LFNG	ENSG00000106003.8	protein_coding	122.915	2.25993	0.291131	7.7626	8.32046e-15	9.37095e-14
AURKB	ENSG00000178999.8	protein_coding	229.461	-1.62551	0.209489	-7.75937	8.53502e-15	9.606e-14
TMCO4	ENSG00000162542.9	protein_coding	191.192	-1.71359	0.220863	-7.75865	8.58411e-15	9.65462e-14
ADK	ENSG00000156110.9	protein_coding	989.329	-0.740443	0.0954813	-7.75485	8.84485e-15	9.94105e-14
GBP2	ENSG00000162645.8	protein_coding	359.307	1.18504	0.152817	7.75467	8.85768e-15	9.94865e-14
POFUT2	ENSG00000186866.12	protein_coding	555.581	0.960985	0.123956	7.75265	8.99934e-15	1.01008e-13
RICTOR	ENSG00000164327.8	protein_coding	645.915	0.901875	0.116377	7.74959	9.21894e-15	1.03402e-13
NUDC	ENSG00000090273.9	protein_coding	2463.29	-0.46373	0.0598503	-7.74817	9.32295e-15	1.04497e-13
YPEL5	ENSG00000119801.8	protein_coding	1714.47	0.548026	0.0708197	7.73832	1.00736e-14	1.12834e-13
AARS	ENSG00000090861.11	protein_coding	3732.15	-0.382038	0.0493708	-7.73813	1.00887e-14	1.12926e-13
RP11-244O19.1	ENSG00000261534.1	sense_overlapping	142.627	1.8871	0.244037	7.73282	1.05193e-14	1.17665e-13
SUV420H1	ENSG00000110066.10	protein_coding	445.467	1.11305	0.144057	7.72642	1.10614e-14	1.23645e-13
ORAOV1	ENSG00000149716.8	protein_coding	1317.98	-0.624796	0.0808777	-7.7252	1.11682e-14	1.24753e-13
KMT2E	ENSG00000005483.15	protein_coding	812.934	0.783379	0.101505	7.71762	1.1852e-14	1.32301e-13
NAPA	ENSG00000105402.3	protein_coding	944.163	-0.787836	0.10209	-7.71709	1.19012e-14	1.3276e-13
OGFR	ENSG00000060491.12	protein_coding	1133.2	0.68823	0.0892435	7.71183	1.24029e-14	1.38262e-13
ABL2	ENSG00000143322.15	protein_coding	2146.93	-0.490052	0.0635766	-7.70805	1.27758e-14	1.42323e-13
RP11-54A9.1	ENSG00000257219.1	lincRNA	148.784	-1.96782	0.255308	-7.70763	1.2818e-14	1.42696e-13
SECTM1	ENSG00000141574.3	protein_coding	226.322	1.49616	0.194203	7.70412	1.31751e-14	1.46571e-13
PPP1R13L	ENSG00000104881.10	protein_coding	745.129	0.83488	0.108387	7.70274	1.33181e-14	1.48063e-13
CHSY1	ENSG00000131873.5	protein_coding	549.994	0.981329	0.127474	7.69826	1.37936e-14	1.53245e-13
FAM20C	ENSG00000177706.8	protein_coding	334.82	1.24258	0.16144	7.69687	1.39435e-14	1.54806e-13
SLC25A3	ENSG00000075415.8	protein_coding	7731.49	-0.278151	0.0361632	-7.69154	1.4537e-14	1.61285e-13
RNASEH2A	ENSG00000104889.4	protein_coding	661.105	-0.883337	0.114865	-7.69023	1.46874e-14	1.62843e-13
SEC61A1	ENSG00000058262.5	protein_coding	4406.72	-0.344446	0.0447921	-7.68988	1.47268e-14	1.63169e-13
ZEB1	ENSG00000148516.17	protein_coding	933.992	0.739979	0.0962576	7.68749	1.50055e-14	1.66146e-13
C19orf48	ENSG00000167747.9	protein_coding	483.789	-1.05365	0.137143	-7.68285	1.55593e-14	1.72161e-13
IL13RA1	ENSG00000131724.6	protein_coding	1445.8	0.639061	0.0832294	7.67831	1.612e-14	1.78244e-13
DHRS7	ENSG00000100612.9	protein_coding	319.943	1.38097	0.179861	7.67799	1.61603e-14	1.7857e-13
MFSD1	ENSG00000118855.14	protein_coding	607.448	-0.963404	0.12549	-7.67712	1.627e-14	1.7966e-13
M6PR	ENSG00000003056.3	protein_coding	1111.62	-0.73954	0.0964032	-7.67132	1.70236e-14	1.87855e-13
CHD9	ENSG00000177200.11	protein_coding	296.413	1.43103	0.186597	7.66908	1.73231e-14	1.91032e-13
LAMA1	ENSG00000101680.9	protein_coding	73.8642	-3.01587	0.393279	-7.66853	1.73976e-14	1.91725e-13
FZD2	ENSG00000180340.5	protein_coding	452.318	-1.0686	0.139447	-7.66317	1.81406e-14	1.99778e-13
UBR7	ENSG00000012963.9	protein_coding	505.351	-1.0128	0.132243	-7.65862	1.8794e-14	2.06835e-13
ATP8B1	ENSG00000081923.6	protein_coding	159.446	-2.09531	0.273642	-7.65712	1.90156e-14	2.09134e-13
VCPIP1	ENSG00000175073.7	protein_coding	360.915	1.16776	0.152527	7.65607	1.91715e-14	2.10706e-13
EDN1	ENSG00000078401.6	protein_coding	254.536	-1.4797	0.193307	-7.6547	1.93771e-14	2.12824e-13
PHLDA2	ENSG00000181649.5	protein_coding	1849.83	0.52428	0.0685853	7.64421	2.10233e-14	2.30749e-13
FOXO3	ENSG00000118689.10	protein_coding	713.086	0.829761	0.108592	7.64109	2.15384e-14	2.36245e-13
ATP11B	ENSG00000058063.11	protein_coding	964.704	0.713628	0.0934346	7.63773	2.21093e-14	2.42344e-13
ITPKC	ENSG00000086544.2	protein_coding	287.924	1.30522	0.171122	7.62742	2.39507e-14	2.62352e-13
CREG1	ENSG00000143162.7	protein_coding	876.657	-0.76316	0.100061	-7.62698	2.40317e-14	2.63064e-13
NFATC2	ENSG00000101096.15	protein_coding	58.0638	-3.54705	0.465084	-7.62668	2.4087e-14	2.63494e-13
PHF17	ENSG00000077684.11	protein_coding	470.799	1.04024	0.136499	7.62088	2.51943e-14	2.75423e-13
SBDS	ENSG00000126524.5	protein_coding	1852.85	-0.578498	0.075931	-7.61874	2.5617e-14	2.79857e-13
IMPDH1	ENSG00000106348.12	protein_coding	495.184	1.04259	0.136897	7.61583	2.62002e-14	2.86037e-13
SPAG1	ENSG00000104450.8	protein_coding	246.484	-1.50043	0.197212	-7.60823	2.77872e-14	3.03161e-13
FBXL5	ENSG00000118564.10	protein_coding	716.175	0.89313	0.117421	7.60625	2.8216e-14	3.07635e-13
FBN1	ENSG00000166147.9	protein_coding	732.739	0.841361	0.110681	7.6017	2.92268e-14	3.18443e-13
S100A13	ENSG00000189171.9	protein_coding	534.027	0.951566	0.12518	7.60156	2.92584e-14	3.18577e-13
PPP1R3C	ENSG00000119938.8	protein_coding	82.1418	2.55616	0.336317	7.60043	2.95147e-14	3.21153e-13
EIF4H	ENSG00000106682.10	protein_coding	4493.74	-0.346315	0.0455775	-7.59839	2.99838e-14	3.26041e-13
IL17RC	ENSG00000163702.14	protein_coding	394.907	1.13378	0.149241	7.59697	3.0315e-14	3.29424e-13
RP11-903H12.3	ENSG00000258451.1	antisense	127.984	1.9663	0.258949	7.5934	3.1161e-14	3.38393e-13
CRKL	ENSG00000099942.8	protein_coding	921.864	0.745833	0.0982302	7.59271	3.1328e-14	3.39981e-13
ARF1	ENSG00000143761.9	protein_coding	6746.41	0.282548	0.0372155	7.59221	3.14493e-14	3.41072e-13
EMC1	ENSG00000127463.9	protein_coding	1160	0.654661	0.0862468	7.59055	3.1854e-14	3.45233e-13
CSRNP1	ENSG00000144655.10	protein_coding	196.599	1.56794	0.206689	7.586	3.29944e-14	3.57356e-13
IGF2	ENSG00000167244.13	protein_coding	160.699	1.78902	0.23593	7.58286	3.38011e-14	3.65851e-13
ICK	ENSG00000112144.11	protein_coding	475.719	-1.03439	0.136432	-7.58174	3.40951e-14	3.6879e-13
MMP24-AS1	ENSG00000126005.11	antisense	1275.6	0.621389	0.0820003	7.57789	3.51213e-14	3.79639e-13
ARPC3	ENSG00000111229.11	protein_coding	3969.14	0.357636	0.0471983	7.57732	3.52773e-14	3.81074e-13
NR1D2	ENSG00000174738.8	protein_coding	786.163	-0.803092	0.106019	-7.57495	3.59256e-14	3.87821e-13
TANC1	ENSG00000115183.9	protein_coding	236.669	-1.52138	0.200884	-7.57343	3.635e-14	3.92145e-13
OGT	ENSG00000147162.9	protein_coding	1145.29	-0.681523	0.0900404	-7.56907	3.75902e-14	4.05257e-13
PBX2	ENSG00000204304.7	protein_coding	1095.56	0.689065	0.0910666	7.56661	3.83097e-14	4.12743e-13
GOT2	ENSG00000125166.8	protein_coding	1828.57	-0.521389	0.069017	-7.5545	4.20477e-14	4.52717e-13
DNAJB9	ENSG00000128590.4	protein_coding	808.007	0.790658	0.104724	7.54992	4.35519e-14	4.68605e-13
OGFRL1	ENSG00000119900.7	protein_coding	1658.13	-0.569459	0.0754693	-7.54557	4.50298e-14	4.84189e-13
TRAK1	ENSG00000182606.10	protein_coding	666.437	-0.873746	0.115819	-7.54406	4.55571e-14	4.89537e-13
MSH2	ENSG00000095002.8	protein_coding	487.145	-1.02109	0.135396	-7.54153	4.6448e-14	4.98783e-13
ARHGAP22	ENSG00000128805.10	protein_coding	427.099	1.06617	0.141438	7.53807	4.76991e-14	5.11883e-13
TMTC3	ENSG00000139324.7	protein_coding	420.868	1.06085	0.140743	7.53751	4.79032e-14	5.13736e-13
RAB32	ENSG00000118508.4	protein_coding	608.154	-0.950588	0.12628	-7.52763	5.16714e-14	5.53786e-13
GAREM	ENSG00000141441.11	protein_coding	200.541	1.54993	0.206014	7.52345	5.33508e-14	5.71411e-13
BEX2	ENSG00000133134.7	protein_coding	97.3299	-2.41993	0.322039	-7.51438	5.71791e-14	6.12015e-13
CLTC	ENSG00000141367.7	protein_coding	5736.38	0.297288	0.0395741	7.51217	5.81545e-14	6.22048e-13
PXDN	ENSG00000130508.6	protein_coding	4139.32	0.341687	0.0454956	7.51034	5.89743e-14	6.30406e-13
UTRN	ENSG00000152818.14	protein_coding	868.793	0.762829	0.101591	7.50881	5.96681e-14	6.37406e-13
MRC2	ENSG00000011028.9	protein_coding	226.756	1.44174	0.192079	7.50596	6.09785e-14	6.5098e-13
FAM13B	ENSG00000031003.6	protein_coding	353.844	-1.26168	0.168112	-7.50499	6.1431e-14	6.55384e-13
ITPR3	ENSG00000096433.6	protein_coding	5840.81	0.294703	0.039277	7.5032	6.22765e-14	6.63972e-13
SOCS2	ENSG00000120833.9	protein_coding	157.577	-1.90092	0.253579	-7.49635	6.56177e-14	6.9914e-13
ADAMTSL4	ENSG00000143382.9	protein_coding	282.977	1.4263	0.190372	7.49218	6.77381e-14	7.21263e-13
TP53INP2	ENSG00000078804.8	protein_coding	841.247	-0.807848	0.107844	-7.4909	6.84039e-14	7.2788e-13
PCNX	ENSG00000100731.11	protein_coding	651.797	0.890837	0.11899	7.48663	7.06623e-14	7.51424e-13
FZD1	ENSG00000157240.2	protein_coding	330.576	1.21892	0.162892	7.48304	7.26248e-14	7.71791e-13
FOXRED2	ENSG00000100350.10	protein_coding	282.677	-1.3358	0.178754	-7.47284	7.84798e-14	8.33473e-13
CDCA8	ENSG00000134690.6	protein_coding	327.472	-1.24777	0.167039	-7.46993	8.02384e-14	8.51598e-13
SH3RF1	ENSG00000154447.10	protein_coding	386.648	-1.19276	0.159679	-7.46973	8.03603e-14	8.52339e-13
MIR137HG	ENSG00000225206.4	lincRNA	90.1508	-2.55963	0.342837	-7.46601	8.26602e-14	8.76166e-13
SMG5	ENSG00000198952.7	protein_coding	1168.04	-0.647028	0.0867867	-7.45538	8.96063e-14	9.49178e-13
TBC1D8	ENSG00000204634.8	protein_coding	495.288	0.975937	0.130907	7.45519	8.97392e-14	9.49971e-13
MAF1	ENSG00000179632.5	protein_coding	3949.68	-0.352051	0.0473131	-7.44089	1.00013e-13	1.05804e-12
PLD5	ENSG00000180287.12	protein_coding	56.6478	3.01596	0.40557	7.43633	1.03517e-13	1.09441e-12
RABAC1	ENSG00000105404.6	protein_coding	635.023	0.857094	0.115271	7.43549	1.0418e-13	1.10071e-12
GPR110	ENSG00000153292.11	protein_coding	93.3988	-2.48941	0.335042	-7.43014	1.08481e-13	1.14541e-12
POLE2	ENSG00000100479.8	protein_coding	164.271	-1.80312	0.242724	-7.42871	1.09665e-13	1.15717e-12
UBN2	ENSG00000157741.10	protein_coding	133.571	1.89032	0.254528	7.42679	1.11267e-13	1.17331e-12
RAB7A	ENSG00000075785.8	protein_coding	3628.85	-0.36482	0.0491384	-7.42432	1.13357e-13	1.19459e-12
TCF7L2	ENSG00000148737.11	protein_coding	419.356	1.05839	0.142672	7.41838	1.18565e-13	1.24867e-12
POLR2A	ENSG00000181222.10	protein_coding	2344.84	0.497895	0.0671224	7.41772	1.19155e-13	1.25407e-12
COMMD6	ENSG00000188243.8	protein_coding	713.957	0.839411	0.113184	7.41632	1.20418e-13	1.26656e-12
PDIA4	ENSG00000155660.6	protein_coding	4354.22	0.333592	0.0450006	7.41306	1.23422e-13	1.29732e-12
SPRY2	ENSG00000136158.6	protein_coding	1771.44	0.519562	0.0701114	7.41051	1.25814e-13	1.32161e-12
RPLP1	ENSG00000137818.7	protein_coding	7032.62	0.266131	0.035923	7.40837	1.27858e-13	1.34223e-12
TAF1	ENSG00000147133.11	protein_coding	558.098	0.915463	0.123575	7.40818	1.28042e-13	1.34329e-12
PCK2	ENSG00000100889.7	protein_coding	396.056	-1.11258	0.150192	-7.40773	1.28477e-13	1.34614e-12
PRKCSH	ENSG00000130175.5	protein_coding	5634.33	0.303942	0.04103	7.40778	1.28427e-13	1.34614e-12
CENPF	ENSG00000117724.8	protein_coding	1540.89	-0.585646	0.0790785	-7.40589	1.30276e-13	1.36411e-12
EHBP1L1	ENSG00000173442.7	protein_coding	1210.32	0.648547	0.0875833	7.40493	1.31224e-13	1.37316e-12
SND1	ENSG00000197157.6	protein_coding	2679.85	0.418643	0.0565693	7.40053	1.35643e-13	1.4185e-12
RPL7L1	ENSG00000146223.10	protein_coding	7278.92	0.259407	0.0350615	7.39862	1.37605e-13	1.43809e-12
TEAD1	ENSG00000187079.10	protein_coding	1387.81	-0.587182	0.0794597	-7.38968	1.47184e-13	1.53722e-12
AC112721.1	ENSG00000222022.1	protein_coding	30.3818	4.41555	0.597598	7.38883	1.48125e-13	1.54606e-12
PSMG1	ENSG00000183527.7	protein_coding	536.964	-0.961097	0.130079	-7.38859	1.48395e-13	1.5479e-12
IFRD1	ENSG00000006652.9	protein_coding	442.58	-1.04838	0.142018	-7.38205	1.55869e-13	1.62483e-12
PCYOX1	ENSG00000116005.7	protein_coding	1520.8	0.645171	0.0874901	7.37422	1.65304e-13	1.72208e-12
MYBL1	ENSG00000185697.12	protein_coding	118.596	-2.29331	0.311049	-7.37283	1.67044e-13	1.73911e-12
RGS17	ENSG00000091844.3	protein_coding	110.821	2.15763	0.292651	7.37269	1.67214e-13	1.73976e-12
NF1	ENSG00000196712.12	protein_coding	524.262	-0.953391	0.129389	-7.36839	1.72702e-13	1.79573e-12
ERCC6	ENSG00000225830.6	protein_coding	226.87	1.44628	0.196543	7.3586	1.85844e-13	1.93115e-12
C4orf47	ENSG00000205129.4	protein_coding	40.1682	3.73209	0.507332	7.35631	1.89064e-13	1.96337e-12
NARS	ENSG00000134440.7	protein_coding	2200.01	-0.46034	0.0625803	-7.35598	1.89527e-13	1.96693e-12
BCAT1	ENSG00000060982.10	protein_coding	2099.62	0.467126	0.0635054	7.35569	1.89946e-13	1.97003e-12
OLAH	ENSG00000152463.10	protein_coding	32.5074	4.28806	0.582979	7.35544	1.90305e-13	1.9725e-12
CAST	ENSG00000153113.19	protein_coding	4221.92	0.376923	0.0512995	7.34749	2.01966e-13	2.09204e-12
KIF23	ENSG00000137807.9	protein_coding	296.344	-1.30085	0.17706	-7.34694	2.02797e-13	2.09933e-12
MAN2B1	ENSG00000104774.8	protein_coding	1304.02	0.686689	0.0934706	7.34658	2.03346e-13	2.10368e-12
SKIL	ENSG00000136603.9	protein_coding	244.485	1.36811	0.186234	7.34617	2.03968e-13	2.10878e-12
MAN1B1	ENSG00000177239.10	protein_coding	1283.51	0.594061	0.0809072	7.34249	2.09653e-13	2.16619e-12
SEMA4D	ENSG00000187764.7	protein_coding	317.718	1.18917	0.161993	7.34091	2.12154e-13	2.19065e-12
NANOS1	ENSG00000188613.5	protein_coding	164.915	-1.73858	0.237065	-7.33379	2.23736e-13	2.30879e-12
AOC2	ENSG00000131480.4	protein_coding	53.3283	3.11158	0.424415	7.33145	2.27676e-13	2.34797e-12
NOL3	ENSG00000140939.10	protein_coding	610.608	0.864983	0.117986	7.33121	2.28087e-13	2.35074e-12
TMEM120A	ENSG00000189077.6	polymorphic_pseudogene	336.876	1.25553	0.171312	7.32889	2.32072e-13	2.39029e-12
BUB1B	ENSG00000156970.8	protein_coding	183.773	-1.63668	0.22338	-7.3269	2.35545e-13	2.42455e-12
SOX9	ENSG00000125398.5	protein_coding	825.934	-0.764135	0.104328	-7.32433	2.40089e-13	2.46976e-12
C6orf62	ENSG00000112308.8	protein_coding	2774.26	0.405715	0.0554132	7.32164	2.44964e-13	2.51676e-12
GULP1	ENSG00000144366.11	protein_coding	194.02	-1.5909	0.217285	-7.32172	2.44816e-13	2.51676e-12
ETV1	ENSG00000006468.9	protein_coding	893.197	0.777006	0.106128	7.32143	2.45333e-13	2.51897e-12
HNRNPAB	ENSG00000197451.6	protein_coding	2250.55	-0.491188	0.0671653	-7.31311	2.61025e-13	2.67841e-12
SMC1A	ENSG00000072501.13	protein_coding	1828.77	-0.560628	0.0766894	-7.31038	2.66396e-13	2.73181e-12
NEGR1	ENSG00000172260.9	protein_coding	121.438	-2.05346	0.280981	-7.30819	2.70767e-13	2.7749e-12
ASUN	ENSG00000064102.10	protein_coding	410.882	1.03739	0.142111	7.29984	2.88115e-13	2.95084e-12
MERTK	ENSG00000153208.12	protein_coding	282.144	-1.30129	0.178569	-7.28732	3.16171e-13	3.23616e-12
TES	ENSG00000135269.13	protein_coding	871.4	-0.73062	0.100261	-7.28715	3.16589e-13	3.23842e-12
HBP1	ENSG00000105856.9	protein_coding	746.864	0.767818	0.10548	7.27927	3.35633e-13	3.43108e-12
PLXNA3	ENSG00000130827.5	protein_coding	466.171	0.974764	0.13393	7.27816	3.384e-13	3.4572e-12
MNT	ENSG00000070444.10	protein_coding	364.518	1.11658	0.15358	7.27035	3.58569e-13	3.66098e-12
YWHAZ	ENSG00000164924.13	protein_coding	13383.3	0.19933	0.0274383	7.26467	3.73952e-13	3.81566e-12
LPIN2	ENSG00000101577.5	protein_coding	1462.57	0.554168	0.0763647	7.25687	3.96158e-13	4.03973e-12
CMAHP	ENSG00000168405.10	pseudogene	35.5927	3.82698	0.527725	7.25184	4.11133e-13	4.18982e-12
HELZ	ENSG00000198265.7	protein_coding	457.157	0.986464	0.136035	7.25153	4.12078e-13	4.19685e-12
ACSL3	ENSG00000123983.9	protein_coding	2425.48	0.455701	0.0628439	7.25131	4.12762e-13	4.2012e-12
KIAA0930	ENSG00000100364.14	protein_coding	388.792	-1.10632	0.152688	-7.24562	4.30473e-13	4.37603e-12
HIST1H2BC	ENSG00000180596.7	protein_coding	58.6023	2.94661	0.406673	7.24566	4.30352e-13	4.37603e-12
MT1F	ENSG00000198417.5	protein_coding	36.1184	3.82681	0.528277	7.24394	4.35839e-13	4.42784e-12
ZNF644	ENSG00000122482.16	protein_coding	666.519	0.862606	0.119085	7.2436	4.3693e-13	4.43616e-12
UBAP1	ENSG00000165006.9	protein_coding	1106.23	0.646825	0.0894226	7.23335	4.71234e-13	4.7815e-12
UBE2S	ENSG00000108106.9	protein_coding	796.779	-0.753099	0.104142	-7.23148	4.77771e-13	4.84482e-12
FAM122B	ENSG00000156504.12	protein_coding	254.331	-1.39488	0.192949	-7.22926	4.85627e-13	4.92145e-12
KDM6B	ENSG00000132510.6	protein_coding	316.639	1.17801	0.162985	7.22772	4.91163e-13	4.97447e-12
HES1	ENSG00000114315.3	protein_coding	140.881	1.80344	0.249533	7.22728	4.9276e-13	4.98756e-12
P2RY6	ENSG00000171631.10	protein_coding	33.7392	3.9897	0.552114	7.22622	4.96634e-13	5.02366e-12
AC008948.1	ENSG00000268424.1	protein_coding	45.454	-3.83099	0.530434	-7.22238	5.10846e-13	5.16424e-12
FAM102A	ENSG00000167106.7	protein_coding	994.211	-0.688889	0.0954062	-7.22059	5.17611e-13	5.22941e-12
PPDPF	ENSG00000125534.5	protein_coding	680.293	0.809564	0.112253	7.21194	5.5159e-13	5.56926e-12
SLC26A6	ENSG00000225697.6	protein_coding	224.847	1.39764	0.193836	7.21044	5.57705e-13	5.62753e-12
UBR4	ENSG00000127481.10	protein_coding	2373.97	-0.466142	0.0646577	-7.20939	5.6204e-13	5.66778e-12
PLEKHA2	ENSG00000169499.10	protein_coding	245.173	1.32663	0.184029	7.20879	5.64523e-13	5.68932e-12
HMOX1	ENSG00000100292.12	protein_coding	242.527	-1.52008	0.210927	-7.20667	5.7336e-13	5.77483e-12
LINC00704	ENSG00000231298.2	lincRNA	145.131	-1.82392	0.253185	-7.20391	5.85094e-13	5.8894e-12
RPL27	ENSG00000131469.8	protein_coding	5165.76	0.293671	0.0408189	7.19448	6.2697e-13	6.30703e-12
CXCL2	ENSG00000081041.8	protein_coding	123.417	1.94198	0.270024	7.19188	6.39045e-13	6.42456e-12
NABP1	ENSG00000173559.8	protein_coding	292.48	-1.3197	0.183513	-7.19132	6.41697e-13	6.44726e-12
RP11-166D19.1	ENSG00000255248.2	sense_overlapping	276.43	1.29068	0.179689	7.18285	6.82751e-13	6.85554e-12
NCAPG2	ENSG00000146918.15	protein_coding	597.793	-0.924392	0.128698	-7.18264	6.83783e-13	6.8617e-12
DSEL	ENSG00000171451.13	protein_coding	171.017	1.67677	0.233635	7.1769	7.13107e-13	7.15158e-12
MTUS1	ENSG00000129422.9	protein_coding	272.581	-1.40016	0.195106	-7.17643	7.15578e-13	7.17198e-12
NLGN2	ENSG00000169992.5	protein_coding	616.894	0.862982	0.12029	7.1742	7.27338e-13	7.28538e-12
KLC2	ENSG00000174996.7	protein_coding	974.176	-0.679631	0.0947541	-7.17258	7.35986e-13	7.3675e-12
EXOC6	ENSG00000138190.12	protein_coding	135.773	-1.94194	0.270939	-7.16745	7.64053e-13	7.64379e-12
RCSD1	ENSG00000198771.6	protein_coding	114.792	-2.23854	0.312551	-7.16218	7.94039e-13	7.93893e-12
MT-TF	ENSG00000210049.1	Mt_tRNA	24.6073	4.6121	0.645307	7.14713	8.86106e-13	8.85403e-12
WTIP	ENSG00000142279.8	protein_coding	99.5932	-2.24597	0.314302	-7.14591	8.93998e-13	8.92745e-12
LSR	ENSG00000105699.12	protein_coding	216.572	-1.53633	0.214998	-7.14579	8.9478e-13	8.92982e-12
KRT81	ENSG00000205426.6	protein_coding	182.008	1.55593	0.217796	7.14397	9.0675e-13	9.04377e-12
PID1	ENSG00000153823.14	protein_coding	305.585	1.22812	0.171983	7.14092	9.27106e-13	9.24118e-12
RBL1	ENSG00000080839.7	protein_coding	240.661	-1.37956	0.193215	-7.14002	9.33153e-13	9.29579e-12
NUAK1	ENSG00000074590.9	protein_coding	883.159	-0.738142	0.10339	-7.13939	9.37471e-13	9.33314e-12
APBB1IP	ENSG00000077420.11	protein_coding	1121.31	-0.6259	0.0876952	-7.13722	9.52394e-13	9.47595e-12
UCN2	ENSG00000145040.3	protein_coding	34.5636	3.7816	0.530005	7.13503	9.67676e-13	9.62215e-12
SRD5A3	ENSG00000128039.6	protein_coding	331.132	1.14368	0.160398	7.13026	1.00178e-12	9.95518e-12
FAM84B	ENSG00000168672.3	protein_coding	677.846	-0.808792	0.113605	-7.11932	1.08459e-12	1.07716e-11
ZBTB7A	ENSG00000178951.4	protein_coding	841.94	0.711385	0.0999436	7.11786	1.09612e-12	1.08796e-11
RP11-106M3.3	ENSG00000261460.1	antisense	436.738	0.98021	0.137783	7.11415	1.12602e-12	1.11696e-11
FLNB	ENSG00000136068.10	protein_coding	8341.6	0.23981	0.0337232	7.11112	1.15109e-12	1.14113e-11
SLC38A4	ENSG00000139209.11	protein_coding	115.717	-2.04272	0.287366	-7.10842	1.17377e-12	1.16292e-11
PKMYT1	ENSG00000127564.12	protein_coding	176.525	-1.63179	0.229707	-7.10379	1.21378e-12	1.20182e-11
GPR125	ENSG00000152990.9	protein_coding	610.595	-0.860545	0.121157	-7.10273	1.22319e-12	1.21042e-11
CYP2U1	ENSG00000155016.13	protein_coding	225.288	-1.52914	0.215323	-7.1016	1.23324e-12	1.21962e-11
NRCAM	ENSG00000091129.15	protein_coding	51.4871	3.08944	0.43505	7.10135	1.23543e-12	1.22105e-11
PPP2R2A	ENSG00000221914.4	protein_coding	760.507	0.757352	0.106694	7.09837	1.26238e-12	1.24693e-11
PKD2	ENSG00000118762.3	protein_coding	251.137	-1.41636	0.199556	-7.09752	1.27018e-12	1.25388e-11
HIGD1A	ENSG00000181061.9	protein_coding	805.521	-0.737771	0.103955	-7.09703	1.27465e-12	1.25754e-11
AURKA	ENSG00000087586.13	protein_coding	658.27	-0.90949	0.128156	-7.09676	1.27716e-12	1.25925e-11
WDR62	ENSG00000075702.12	protein_coding	130.023	-1.95298	0.275205	-7.09645	1.27999e-12	1.26069e-11
AHCTF1	ENSG00000153207.10	protein_coding	1028.98	0.675562	0.0951974	7.09644	1.28016e-12	1.26069e-11
PTPRK	ENSG00000152894.10	protein_coding	790.22	-0.741554	0.104511	-7.09548	1.28901e-12	1.26865e-11
LIG1	ENSG00000105486.9	protein_coding	228.146	-1.50324	0.212013	-7.09032	1.33806e-12	1.31613e-11
RHEB	ENSG00000106615.5	protein_coding	2123.69	-0.478113	0.0674512	-7.08828	1.35789e-12	1.33484e-11
RHOF	ENSG00000139725.3	protein_coding	622.345	-0.836794	0.118062	-7.08775	1.36306e-12	1.33911e-11
SORT1	ENSG00000134243.7	protein_coding	1716.18	0.511373	0.0721615	7.08651	1.37541e-12	1.35044e-11
CTD-2636A23.2	ENSG00000261604.1	antisense	242.916	-1.37102	0.193653	-7.07976	1.44402e-12	1.41695e-11
ATP6V0A1	ENSG00000033627.10	protein_coding	615.352	-0.86201	0.121814	-7.07644	1.47908e-12	1.45049e-11
RP11-328C8.4	ENSG00000257225.1	antisense	65.6435	-2.90017	0.409898	-7.07535	1.49073e-12	1.46104e-11
PPAP2A	ENSG00000067113.12	protein_coding	692.154	-0.794848	0.112343	-7.07518	1.49258e-12	1.46198e-11
STEAP1	ENSG00000164647.4	protein_coding	242.412	1.39567	0.197428	7.06927	1.5575e-12	1.52466e-11
LASP1	ENSG00000002834.13	protein_coding	5378.88	-0.292379	0.0413641	-7.06842	1.56708e-12	1.53311e-11
PTPRQ	ENSG00000139304.8	protein_coding	41.2547	-3.88528	0.549678	-7.06828	1.56868e-12	1.53377e-11
CDC42EP1	ENSG00000128283.6	protein_coding	879.103	-0.712703	0.100894	-7.0639	1.61888e-12	1.58191e-11
FBXO27	ENSG00000161243.4	protein_coding	160.204	-1.68581	0.238669	-7.06339	1.62493e-12	1.58687e-11
WDHD1	ENSG00000198554.7	protein_coding	414.76	-1.0244	0.145071	-7.06139	1.6485e-12	1.60893e-11
BEAN1	ENSG00000166546.9	protein_coding	28.4947	4.26368	0.604187	7.05688	1.70285e-12	1.66098e-11
SLC4A11	ENSG00000088836.8	protein_coding	227.366	-1.42158	0.201606	-7.0513	1.77257e-12	1.72797e-11
BACH1	ENSG00000156273.11	protein_coding	1032.08	0.648466	0.0919871	7.04953	1.79518e-12	1.74896e-11
ANKRD28	ENSG00000206560.6	protein_coding	1504.22	0.558016	0.0792296	7.04303	1.88107e-12	1.83156e-11
FERMT1	ENSG00000101311.11	protein_coding	262.477	1.31414	0.18667	7.03994	1.92323e-12	1.87149e-11
MAP4K5	ENSG00000012983.7	protein_coding	1429.17	-0.54872	0.0779485	-7.03953	1.92896e-12	1.87596e-11
MOXD1	ENSG00000079931.10	protein_coding	53.0732	-3.21954	0.457636	-7.03516	1.99037e-12	1.93453e-11
ANLN	ENSG00000011426.6	protein_coding	812.542	-0.755668	0.10749	-7.03014	2.06321e-12	2.00414e-11
LMAN1	ENSG00000074695.5	protein_coding	1531.32	0.547398	0.0778938	7.02749	2.10282e-12	2.0414e-11
SLC43A2	ENSG00000167703.10	protein_coding	53.0882	2.98267	0.424606	7.02456	2.14734e-12	2.08316e-11
LUZP1	ENSG00000169641.9	protein_coding	911.112	0.718831	0.102332	7.0245	2.14837e-12	2.08316e-11
CHKA	ENSG00000110721.7	protein_coding	723.011	-0.773473	0.110126	-7.02354	2.16322e-12	2.09632e-11
ZC3HAV1	ENSG00000105939.8	protein_coding	506.583	0.928303	0.132224	7.02068	2.20793e-12	2.13763e-11
TAF9B	ENSG00000187325.4	protein_coding	509.378	0.905023	0.128909	7.02064	2.20847e-12	2.13763e-11
BRAF	ENSG00000157764.8	protein_coding	279.969	1.23047	0.175389	7.01566	2.28866e-12	2.21395e-11
CP	ENSG00000047457.9	protein_coding	188.052	1.48353	0.211513	7.0139	2.31758e-12	2.2406e-11
BHLHE41	ENSG00000123095.5	protein_coding	249.742	1.40456	0.200362	7.01009	2.38157e-12	2.30111e-11
CLIP1	ENSG00000130779.15	protein_coding	1250.25	-0.59372	0.0846993	-7.00973	2.38776e-12	2.30572e-11
PAPPA	ENSG00000182752.8	protein_coding	109.19	2.00532	0.286241	7.0057	2.45763e-12	2.3718e-11
BCL2	ENSG00000171791.10	protein_coding	84.0139	-2.47752	0.35376	-7.00338	2.49852e-12	2.40984e-11
PDE10A	ENSG00000112541.9	protein_coding	175.094	1.54818	0.221065	7.0033	2.50009e-12	2.40994e-11
ATP6AP2	ENSG00000182220.9	protein_coding	1660.02	0.514297	0.0734396	7.00299	2.50563e-12	2.41386e-11
PYCR2	ENSG00000143811.12	protein_coding	645.751	-0.816346	0.116698	-6.99535	2.64594e-12	2.54754e-11
AGPAT1	ENSG00000204310.6	protein_coding	2119.05	0.445485	0.0637068	6.99273	2.69589e-12	2.5941e-11
ABLIM1	ENSG00000099204.14	protein_coding	626.486	-0.883135	0.126347	-6.98973	2.75406e-12	2.64852e-11
DYNC1LI2	ENSG00000135720.8	protein_coding	1146.14	0.622517	0.0891447	6.98323	2.88478e-12	2.7726e-11
AZI2	ENSG00000163512.9	protein_coding	900.87	0.694791	0.099498	6.98296	2.8902e-12	2.77619e-11
KIF6	ENSG00000164627.13	protein_coding	50.3335	-3.3417	0.478888	-6.97804	2.99324e-12	2.87347e-11
TBC1D9	ENSG00000109436.7	protein_coding	538.015	-0.886894	0.127197	-6.97262	3.11096e-12	2.98473e-11
MYBL2	ENSG00000101057.11	protein_coding	112.927	-2.09526	0.30055	-6.97144	3.13708e-12	3.00803e-11
R3HDM4	ENSG00000198858.5	protein_coding	664.5	0.815836	0.117062	6.96925	3.18625e-12	3.0534e-11
GOT1	ENSG00000120053.9	protein_coding	675.433	-0.830726	0.119503	-6.95151	3.61404e-12	3.45931e-11
LA16c-390E6.5	ENSG00000261641.2	antisense	234.876	-1.37085	0.1972	-6.95159	3.612e-12	3.45931e-11
MPP5	ENSG00000072415.4	protein_coding	900.113	-0.700315	0.100769	-6.9497	3.66064e-12	3.50186e-11
ASNA1	ENSG00000198356.7	protein_coding	1936.69	-0.468616	0.0674529	-6.9473	3.72351e-12	3.55993e-11
ESYT1	ENSG00000139641.8	protein_coding	1548.91	0.539025	0.077645	6.94218	3.86107e-12	3.68929e-11
hsa-mir-6723	ENSG00000237973.1	pseudogene	1432.78	0.579199	0.0834614	6.93972	3.92879e-12	3.75181e-11
ZBTB4	ENSG00000174282.7	protein_coding	1197.65	0.581719	0.0838869	6.93456	4.0749e-12	3.88907e-11
NUCB1-AS1	ENSG00000235191.1	antisense	450.317	0.953228	0.137493	6.93292	4.12232e-12	3.93204e-11
JUP	ENSG00000173801.12	protein_coding	825.293	0.728659	0.105167	6.92859	4.25051e-12	4.05196e-11
ARMC9	ENSG00000135931.13	protein_coding	253.389	-1.34259	0.193804	-6.92756	4.28161e-12	4.07923e-11
HIST2H2BE	ENSG00000184678.8	protein_coding	92.9015	2.13349	0.308108	6.92451	4.37492e-12	4.16571e-11
TGIF1	ENSG00000177426.16	protein_coding	1084.37	0.616859	0.0891013	6.92312	4.41813e-12	4.20441e-11
ANKZF1	ENSG00000163516.9	protein_coding	272.339	1.23016	0.177751	6.92072	4.49346e-12	4.27361e-11
EDNRA	ENSG00000151617.11	protein_coding	102.585	1.98391	0.286688	6.9201	4.51323e-12	4.28993e-11
FRMD5	ENSG00000171877.15	protein_coding	218.788	-1.40691	0.203328	-6.9194	4.5355e-12	4.30859e-11
SGCE	ENSG00000127990.11	protein_coding	685.796	-0.793412	0.114675	-6.91876	4.55607e-12	4.32563e-11
REST	ENSG00000084093.11	protein_coding	470.388	0.975757	0.141043	6.91813	4.57642e-12	4.34243e-11
FPR1	ENSG00000171051.4	protein_coding	26.3771	4.20637	0.608045	6.91786	4.58521e-12	4.34825e-11
AGPAT9	ENSG00000138678.6	protein_coding	673.501	-0.787696	0.113879	-6.91693	4.61524e-12	4.3742e-11
THBD	ENSG00000178726.6	protein_coding	504.052	0.895189	0.129428	6.9165	4.62954e-12	4.38522e-11
LBR	ENSG00000143815.10	protein_coding	398.86	-1.06949	0.154715	-6.91261	4.75802e-12	4.50431e-11
RIPK4	ENSG00000183421.7	protein_coding	154.148	1.66231	0.240686	6.90658	4.96491e-12	4.69746e-11
PTGS2	ENSG00000073756.7	protein_coding	419.868	0.972134	0.14082	6.90339	5.07757e-12	4.80128e-11
RPS15A	ENSG00000134419.11	protein_coding	1843.35	0.480253	0.0695873	6.90144	5.14787e-12	4.86494e-11
TMEM87B	ENSG00000153214.5	protein_coding	404.459	-1.03754	0.150441	-6.89665	5.32417e-12	5.02866e-11
RP11-252A24.7	ENSG00000260539.1	lincRNA	192.334	1.49662	0.217232	6.88949	5.5992e-12	5.28537e-11
SYTL2	ENSG00000137501.12	protein_coding	138.754	-1.7872	0.259602	-6.88439	5.80347e-12	5.47504e-11
BATF	ENSG00000156127.6	protein_coding	204.05	2.96692	0.432329	6.86265	6.75967e-12	6.37346e-11
CIDEC	ENSG00000187288.6	protein_coding	22.373	4.46836	0.651648	6.85702	7.03139e-12	6.62584e-11
PVRL1	ENSG00000110400.6	protein_coding	192.431	1.50478	0.219526	6.8547	7.1464e-12	6.73035e-11
CEP290	ENSG00000198707.10	protein_coding	399.004	1.02098	0.148992	6.85258	7.25301e-12	6.82683e-11
CMPK1	ENSG00000162368.9	protein_coding	1846.42	0.474921	0.0693367	6.8495	7.41108e-12	6.97161e-11
MTMR1	ENSG00000063601.12	protein_coding	609.99	-0.815019	0.118994	-6.84926	7.42306e-12	6.97887e-11
KIF17	ENSG00000117245.8	protein_coding	33.3729	-4.22482	0.617015	-6.84719	7.53166e-12	7.07691e-11
TANGO2	ENSG00000183597.11	protein_coding	215.463	-1.46893	0.214626	-6.84413	7.69445e-12	7.22573e-11
ERGIC3	ENSG00000125991.14	protein_coding	2806.83	0.378486	0.0553842	6.83382	8.26834e-12	7.76021e-11
MPZL1	ENSG00000197965.7	protein_coding	1734.75	-0.493332	0.0722117	-6.83174	8.38884e-12	7.8688e-11
RAB17	ENSG00000124839.8	protein_coding	34.889	-4.04821	0.592576	-6.83155	8.40003e-12	7.87479e-11
RP11-554I8.2	ENSG00000223784.1	lincRNA	54.8609	-3.06069	0.448131	-6.8299	8.49738e-12	7.9615e-11
GPATCH2L	ENSG00000089916.13	protein_coding	482.292	0.927506	0.13589	6.82543	8.76649e-12	8.20894e-11
MCF2L2	ENSG00000053524.7	protein_coding	138.776	1.67502	0.245529	6.8221	8.97183e-12	8.39642e-11
DAGLA	ENSG00000134780.5	protein_coding	169.1	-1.57714	0.231289	-6.81892	9.17286e-12	8.57966e-11
SRSF6	ENSG00000124193.10	protein_coding	1241.18	-0.572068	0.0839103	-6.81761	9.25648e-12	8.65293e-11
TGFA	ENSG00000163235.11	protein_coding	412.214	1.03583	0.152023	6.8136	9.51873e-12	8.89301e-11
RP11-344N10.2	ENSG00000237768.2	antisense	89.9564	2.13728	0.31371	6.81293	9.56294e-12	8.92922e-11
CTD-3118D11.2	ENSG00000253675.1	antisense	76.2221	-2.44908	0.359595	-6.81065	9.71604e-12	9.06701e-11
CLASP1	ENSG00000074054.13	protein_coding	548.893	0.862473	0.126712	6.80654	9.99709e-12	9.32018e-11
AL136376.1	ENSG00000269279.1	protein_coding	768.778	0.71666	0.10529	6.80652	9.9987e-12	9.32018e-11
ACOX2	ENSG00000168306.8	protein_coding	50.7146	2.95716	0.434483	6.80617	1.00235e-11	9.33794e-11
GPC6	ENSG00000183098.6	protein_coding	172.208	1.55235	0.228102	6.80552	1.00685e-11	9.3746e-11
ARHGAP27	ENSG00000159314.7	protein_coding	402.522	1.00548	0.147764	6.80462	1.01316e-11	9.42798e-11
NME7	ENSG00000143156.9	protein_coding	797.3	-0.735988	0.108253	-6.79878	1.0551e-11	9.81271e-11
SIN3A	ENSG00000169375.11	protein_coding	786.747	0.707886	0.104125	6.79839	1.05794e-11	9.83346e-11
ETFB	ENSG00000105379.5	protein_coding	180.455	1.49563	0.220065	6.79632	1.07322e-11	9.96986e-11
CXCR5	ENSG00000160683.4	protein_coding	691.279	0.76437	0.112485	6.7953	1.08089e-11	1.00354e-10
ARNT	ENSG00000143437.16	protein_coding	589.907	0.812779	0.119766	6.78637	1.14991e-11	1.06702e-10
PCID2	ENSG00000126226.17	protein_coding	318.171	-1.13682	0.167522	-6.78608	1.15219e-11	1.06853e-10
BASP1	ENSG00000176788.7	protein_coding	2324.45	-0.414984	0.0611817	-6.78281	1.17858e-11	1.09239e-10
MAP2K1	ENSG00000169032.5	protein_coding	1118.67	0.600696	0.088566	6.78247	1.18138e-11	1.09436e-10
TMEM258	ENSG00000134825.9	protein_coding	466.673	0.931393	0.13735	6.78116	1.19215e-11	1.10372e-10
CD46	ENSG00000117335.14	protein_coding	2479.98	0.431177	0.0635933	6.78023	1.19987e-11	1.11023e-10
MRPS7	ENSG00000125445.6	protein_coding	569.517	-0.855179	0.126186	-6.77713	1.22591e-11	1.13369e-10
AKT1	ENSG00000142208.11	protein_coding	1895.46	-0.459641	0.0678429	-6.77507	1.24344e-11	1.14925e-10
TLN1	ENSG00000137076.14	protein_coding	6088.15	0.260226	0.0384676	6.76482	1.33475e-11	1.23295e-10
HN1L	ENSG00000206053.8	protein_coding	1040.18	-0.659782	0.0975522	-6.76337	1.3482e-11	1.24467e-10
RP11-192H23.5	ENSG00000265168.1	antisense	106.485	1.9287	0.285198	6.76268	1.3546e-11	1.24988e-10
UBC	ENSG00000150991.10	protein_coding	15625	0.566768	0.0838127	6.76232	1.35801e-11	1.25232e-10
USO1	ENSG00000138768.10	protein_coding	1557.67	0.496587	0.0734599	6.75997	1.38017e-11	1.27204e-10
PPP2R5C	ENSG00000078304.15	protein_coding	1426.69	0.519896	0.0769809	6.75357	1.44252e-11	1.32876e-10
HS2ST1	ENSG00000153936.12	protein_coding	473.913	0.903068	0.133739	6.75246	1.45359e-11	1.3382e-10
PLCL2	ENSG00000154822.11	protein_coding	105.477	-2.03508	0.301553	-6.74869	1.49187e-11	1.37267e-10
MBNL2	ENSG00000139793.14	protein_coding	631.917	-0.81954	0.121547	-6.74255	1.55635e-11	1.4312e-10
KIAA2018	ENSG00000176542.5	protein_coding	194.182	1.40288	0.208116	6.74084	1.57476e-11	1.44731e-10
DPEP1	ENSG00000015413.5	protein_coding	21.9025	4.41276	0.654782	6.73927	1.5918e-11	1.46215e-10
PBXIP1	ENSG00000163346.12	protein_coding	856.33	0.703044	0.104324	6.73905	1.5943e-11	1.46363e-10
PRRC2B	ENSG00000130723.13	protein_coding	1879.53	0.473829	0.0703189	6.73828	1.60268e-11	1.4705e-10
AGO2	ENSG00000123908.7	protein_coding	524.522	0.851146	0.126327	6.73764	1.60978e-11	1.47619e-10
VIPR1-AS1	ENSG00000232354.3	antisense	92.8971	2.1031	0.312257	6.73516	1.63745e-11	1.50073e-10
FLOT2	ENSG00000132589.11	protein_coding	979.17	0.62893	0.0933935	6.7342	1.64836e-11	1.50988e-10
CRTAM	ENSG00000109943.4	protein_coding	27.9219	3.89028	0.577797	6.73295	1.6626e-11	1.52207e-10
DIAPH3	ENSG00000139734.13	protein_coding	219.688	-1.35691	0.201595	-6.73089	1.68634e-11	1.54294e-10
LHFP	ENSG00000183722.7	protein_coding	276.203	-1.22065	0.181477	-6.72619	1.74167e-11	1.59268e-10
PPP1CB	ENSG00000213639.5	protein_coding	1913.09	0.447843	0.0665835	6.72605	1.74337e-11	1.59334e-10
STIL	ENSG00000123473.11	protein_coding	229.21	-1.34903	0.200749	-6.71999	1.81739e-11	1.66007e-10
BOD1L1	ENSG00000038219.8	protein_coding	1465.55	0.513607	0.0764486	6.71833	1.83817e-11	1.67811e-10
UBA2	ENSG00000126261.8	protein_coding	1007.91	0.618911	0.0921266	6.71804	1.84183e-11	1.68052e-10
TMED2	ENSG00000086598.6	protein_coding	4116.85	0.31151	0.046382	6.71619	1.86538e-11	1.70106e-10
PACSIN2	ENSG00000100266.13	protein_coding	977.784	0.634507	0.0945515	6.7107	1.93689e-11	1.76529e-10
RIOK3	ENSG00000101782.10	protein_coding	1398.61	0.524339	0.0781822	6.70664	1.99162e-11	1.81416e-10
GLRB	ENSG00000109738.6	protein_coding	98.2652	-2.11576	0.315493	-6.7062	1.99759e-11	1.81858e-10
ARHGAP39	ENSG00000147799.7	protein_coding	222.291	-1.35248	0.201725	-6.70454	2.02045e-11	1.83837e-10
SH2B3	ENSG00000111252.6	protein_coding	2004.51	0.46426	0.0692634	6.70282	2.04433e-11	1.85907e-10
LRR1	ENSG00000165501.12	protein_coding	237.585	-1.30494	0.19496	-6.69338	2.18068e-11	1.98196e-10
AFAP1	ENSG00000196526.6	protein_coding	945.787	-0.640332	0.0956792	-6.69249	2.19406e-11	1.99302e-10
NPAS2	ENSG00000170485.12	protein_coding	1364.44	0.529022	0.0790981	6.68817	2.25971e-11	2.05152e-10
KIAA1429	ENSG00000164944.7	protein_coding	765.165	0.743428	0.111162	6.68776	2.26613e-11	2.0562e-10
BEND3	ENSG00000178409.9	protein_coding	345.681	1.07103	0.160469	6.67436	2.48305e-11	2.25179e-10
CTNNA1	ENSG00000044115.16	protein_coding	7628.69	-0.241894	0.0362467	-6.67356	2.49677e-11	2.26298e-10
CSNK1E	ENSG00000213923.6	protein_coding	1422.23	0.573035	0.0858843	6.67217	2.52052e-11	2.28324e-10
PLK4	ENSG00000142731.6	protein_coding	133.474	-1.85199	0.277852	-6.66536	2.64009e-11	2.39023e-10
FZD6	ENSG00000164930.7	protein_coding	803.171	-0.698542	0.104819	-6.6643	2.65932e-11	2.40631e-10
SGOL1	ENSG00000129810.10	protein_coding	85.2912	-2.2284	0.334431	-6.66326	2.67814e-11	2.42201e-10
AIM2	ENSG00000163568.9	protein_coding	84.6747	2.1006	0.315282	6.66261	2.69005e-11	2.43143e-10
GATA6	ENSG00000141448.4	protein_coding	279.651	-1.18783	0.178295	-6.66217	2.69812e-11	2.43738e-10
SLC2A4RG	ENSG00000125520.9	protein_coding	428.341	0.931303	0.139802	6.66161	2.70853e-11	2.44544e-10
POC1A	ENSG00000164087.3	protein_coding	191.335	-1.59555	0.239644	-6.65798	2.77611e-11	2.50507e-10
PDE4D	ENSG00000113448.12	protein_coding	277.518	1.26494	0.19006	6.65548	2.82368e-11	2.5466e-10
KLC3	ENSG00000104892.12	protein_coding	90.2183	-2.18697	0.32882	-6.65095	2.91201e-11	2.62482e-10
WDR54	ENSG00000005448.12	protein_coding	370.234	0.994543	0.149591	6.64843	2.96232e-11	2.66869e-10
GINS4	ENSG00000147536.7	protein_coding	115.313	-1.89003	0.284307	-6.64785	2.974e-11	2.67774e-10
ERN1	ENSG00000178607.11	protein_coding	403.082	0.964165	0.145259	6.63755	3.18933e-11	2.87005e-10
AC012358.8	ENSG00000240401.4	antisense	73.7213	2.35882	0.355383	6.63741	3.19246e-11	2.87129e-10
TRAPPC11	ENSG00000168538.11	protein_coding	444.727	0.937032	0.141235	6.63457	3.25459e-11	2.92556e-10
CISD1	ENSG00000122873.7	protein_coding	449.136	-0.959762	0.144683	-6.63353	3.27747e-11	2.94451e-10
RRP36	ENSG00000124541.6	protein_coding	1237.6	-0.59314	0.0894652	-6.62984	3.36054e-11	3.01749e-10
OSBP	ENSG00000110048.7	protein_coding	1424.42	0.508396	0.0766902	6.62921	3.3749e-11	3.02872e-10
BLOC1S5	ENSG00000188428.12	protein_coding	435.045	0.936086	0.141512	6.61487	3.7189e-11	3.33561e-10
PSMB7	ENSG00000136930.8	protein_coding	1531.74	-0.514056	0.077774	-6.60961	3.85335e-11	3.45432e-10
TNFSF15	ENSG00000181634.7	protein_coding	291.709	-2.90778	0.440041	-6.60797	3.89638e-11	3.49098e-10
MYO10	ENSG00000145555.10	protein_coding	1806.9	-0.475986	0.0720373	-6.60748	3.90906e-11	3.50043e-10
RAP1GDS1	ENSG00000138698.10	protein_coding	1277.29	0.535959	0.0811687	6.60303	4.02847e-11	3.60538e-10
AUP1	ENSG00000115307.12	protein_coding	1898.16	-0.45243	0.0685418	-6.6008	4.08951e-11	3.65801e-10
CKAP2L	ENSG00000169607.8	protein_coding	169.544	-1.53161	0.232126	-6.59819	4.16194e-11	3.72077e-10
ADCY9	ENSG00000162104.5	protein_coding	304.24	-1.12095	0.169931	-6.59647	4.21066e-11	3.76227e-10
RP11-638I2.8	ENSG00000258666.1	antisense	298.235	-1.16434	0.176607	-6.59284	4.315e-11	3.8534e-10
TNFRSF11B	ENSG00000164761.4	protein_coding	61.2421	-2.91116	0.441712	-6.59064	4.37942e-11	3.9088e-10
PTPRB	ENSG00000127329.10	protein_coding	65.8341	-2.55927	0.388391	-6.58942	4.4156e-11	3.93894e-10
GINS2	ENSG00000131153.4	protein_coding	123.227	-1.80861	0.274644	-6.58528	4.54036e-11	4.04804e-10
PLLP	ENSG00000102934.5	protein_coding	231.728	-1.34334	0.204023	-6.58424	4.57229e-11	4.07429e-10
ALDH9A1	ENSG00000143149.8	protein_coding	1087.03	-0.6021	0.0914632	-6.58298	4.61116e-11	4.10669e-10
SDC3	ENSG00000162512.11	protein_coding	1260.89	-0.549275	0.0835091	-6.57742	4.78674e-11	4.26075e-10
ANKRD13A	ENSG00000076513.12	protein_coding	589.589	-0.81289	0.12363	-6.5752	4.85872e-11	4.32012e-10
WDR76	ENSG00000092470.7	protein_coding	118.768	-1.93367	0.294082	-6.57526	4.85688e-11	4.32012e-10
RP11-80B9.1	ENSG00000226919.1	antisense	32.2275	-3.9338	0.598322	-6.57472	4.87443e-11	4.33174e-10
GSTP1	ENSG00000084207.11	protein_coding	819.59	0.682407	0.103826	6.57261	4.94401e-11	4.39119e-10
ATG14	ENSG00000126775.8	protein_coding	691.672	0.72324	0.110101	6.56888	5.06961e-11	4.50031e-10
AGR2	ENSG00000106541.7	protein_coding	524.685	0.831903	0.126713	6.56528	5.19343e-11	4.60773e-10
FMNL1	ENSG00000184922.9	protein_coding	1686.01	0.490316	0.0747656	6.55804	5.45195e-11	4.83447e-10
CTD-2195B23.3	ENSG00000269652.1	antisense	210.764	-1.37056	0.209006	-6.55751	5.47125e-11	4.84896e-10
ATXN1	ENSG00000124788.13	protein_coding	451.962	0.889512	0.135719	6.55407	5.59884e-11	4.95936e-10
GCLM	ENSG00000023909.5	protein_coding	226.391	-1.31185	0.200293	-6.54964	5.76778e-11	5.10624e-10
RP11-367G6.3	ENSG00000272053.1	lincRNA	22.3296	4.16092	0.635417	6.54833	5.81836e-11	5.14824e-10
SMC4	ENSG00000113810.11	protein_coding	683.376	-0.739064	0.112872	-6.54779	5.83936e-11	5.16403e-10
BAZ2B	ENSG00000123636.13	protein_coding	155.669	1.54428	0.236149	6.53943	6.17555e-11	5.4584e-10
PTTG1IP	ENSG00000183255.7	protein_coding	11058.1	-0.193019	0.0295218	-6.5382	6.22635e-11	5.50034e-10
CDC45	ENSG00000093009.5	protein_coding	90.8829	-2.09785	0.32088	-6.5378	6.24308e-11	5.51214e-10
ENPP1	ENSG00000197594.7	protein_coding	1770.77	0.451435	0.0691117	6.53196	6.49155e-11	5.72843e-10
SOS1	ENSG00000115904.8	protein_coding	747.916	0.70009	0.107237	6.52841	6.64705e-11	5.8625e-10
SNED1	ENSG00000162804.9	protein_coding	110.672	3.42711	0.525567	6.52079	6.99391e-11	6.1651e-10
EPS8	ENSG00000151491.8	protein_coding	841.434	0.651039	0.0998982	6.51702	7.17163e-11	6.31836e-10
ZFR	ENSG00000056097.11	protein_coding	1639.96	0.478416	0.0734563	6.51293	7.36978e-11	6.48733e-10
TIMM17A	ENSG00000134375.6	protein_coding	1174.58	-0.556746	0.0854835	-6.5129	7.37133e-11	6.48733e-10
CRYL1	ENSG00000165475.9	protein_coding	197.036	1.33985	0.205755	6.51187	7.42199e-11	6.5284e-10
TSPAN15	ENSG00000099282.5	protein_coding	335.116	1.04723	0.160879	6.50939	7.54569e-11	6.63009e-10
EPHX4	ENSG00000172031.6	protein_coding	124.141	-1.85077	0.284322	-6.50943	7.54375e-11	6.63009e-10
CENPO	ENSG00000138092.6	protein_coding	464.1	-0.897257	0.138047	-6.49966	8.05013e-11	7.06954e-10
MYO9A	ENSG00000066933.11	protein_coding	414.677	0.917563	0.141201	6.49827	8.12483e-11	7.13131e-10
KDM5A	ENSG00000073614.7	protein_coding	355.293	1.0549	0.162446	6.49389	8.3647e-11	7.33792e-10
RPS7	ENSG00000171863.8	protein_coding	9016.78	0.205594	0.0316845	6.48877	8.654e-11	7.58765e-10
DUSP3	ENSG00000108861.4	protein_coding	945.252	-0.654712	0.10092	-6.48741	8.7322e-11	7.65212e-10
KLF17	ENSG00000171872.4	protein_coding	29.5602	3.53805	0.545493	6.48596	8.81675e-11	7.72208e-10
SAMHD1	ENSG00000101347.7	protein_coding	406.058	-0.946445	0.145932	-6.4855	8.84364e-11	7.73943e-10
HIST1H4H	ENSG00000158406.2	protein_coding	89.0523	2.00622	0.309341	6.48546	8.84601e-11	7.73943e-10
ASAH1	ENSG00000104763.13	protein_coding	1461.01	-0.497221	0.0767376	-6.47949	9.20327e-11	8.04771e-10
ARIH2	ENSG00000177479.15	protein_coding	1063.71	-0.613635	0.0948808	-6.46743	9.9687e-11	8.71238e-10
CST1	ENSG00000170373.4	protein_coding	4722.77	-1.36003	0.210309	-6.46683	1.00082e-10	8.74222e-10
UFSP2	ENSG00000109775.6	protein_coding	498.954	0.840773	0.130021	6.46644	1.00335e-10	8.75971e-10
PPARG	ENSG00000132170.15	protein_coding	770.276	-0.699516	0.108264	-6.46118	1.03887e-10	9.06491e-10
SCAMP1	ENSG00000085365.13	protein_coding	564.592	0.802339	0.124182	6.46097	1.04032e-10	9.07274e-10
PTGFR	ENSG00000122420.5	protein_coding	29.688	3.54501	0.548828	6.45925	1.05226e-10	9.17201e-10
RPS6KA4	ENSG00000162302.8	protein_coding	383.428	-0.972344	0.150562	-6.45811	1.06021e-10	9.23641e-10
RGS4	ENSG00000117152.9	protein_coding	75.903	-2.3136	0.3584	-6.45537	1.07956e-10	9.39502e-10
RPP25	ENSG00000178718.5	protein_coding	433.733	-0.927174	0.143628	-6.45539	1.07943e-10	9.39502e-10
TM9SF3	ENSG00000077147.10	protein_coding	2972.18	0.349159	0.054093	6.45479	1.0837e-10	9.42604e-10
ANK2	ENSG00000145362.12	protein_coding	361.934	-1.01059	0.156567	-6.45464	1.08479e-10	9.4305e-10
CTH	ENSG00000116761.7	protein_coding	573.704	-0.822585	0.127488	-6.45226	1.10196e-10	9.57468e-10
SETX	ENSG00000107290.9	protein_coding	992.117	0.613782	0.0951327	6.45185	1.10491e-10	9.59524e-10
CNOT6L	ENSG00000138767.8	protein_coding	323.537	1.13888	0.176567	6.45014	1.11743e-10	9.69883e-10
JARID2	ENSG00000008083.9	protein_coding	1001.3	0.644849	0.10008	6.44334	1.16876e-10	1.01336e-09
NEK6	ENSG00000119408.12	protein_coding	1284.1	0.571514	0.088698	6.44337	1.16847e-10	1.01336e-09
LGR5	ENSG00000139292.8	protein_coding	28.5501	-4.02693	0.625221	-6.4408	1.18842e-10	1.02986e-09
MFAP2	ENSG00000117122.9	protein_coding	177.308	1.43902	0.223441	6.44027	1.19259e-10	1.03292e-09
SMYD3	ENSG00000185420.14	protein_coding	445.729	-0.910573	0.141456	-6.43713	1.2175e-10	1.05395e-09
TBXAS1	ENSG00000059377.11	protein_coding	116.933	1.76973	0.274976	6.43596	1.22695e-10	1.06157e-09
MKKS	ENSG00000125863.13	protein_coding	776.569	-0.681851	0.105955	-6.43526	1.23263e-10	1.06592e-09
IFIT3	ENSG00000119917.9	protein_coding	1369.52	-0.524166	0.0814721	-6.43369	1.24543e-10	1.07642e-09
MIR210HG	ENSG00000247095.2	lincRNA	77.9406	2.42543	0.377065	6.43238	1.25625e-10	1.0852e-09
IDUA	ENSG00000127415.8	protein_coding	198.376	1.30991	0.203746	6.42911	1.28355e-10	1.1082e-09
HNRNPR	ENSG00000125944.14	protein_coding	2351.15	-0.389775	0.060653	-6.42631	1.30739e-10	1.12818e-09
CAPRIN2	ENSG00000110888.13	protein_coding	332.872	1.08197	0.168376	6.42592	1.31072e-10	1.12927e-09
KYNU	ENSG00000115919.10	protein_coding	73.1707	2.17598	0.33862	6.42603	1.30981e-10	1.12927e-09
NBEA	ENSG00000172915.14	protein_coding	150.014	1.5222	0.236882	6.42596	1.31044e-10	1.12927e-09
TFDP1	ENSG00000198176.8	protein_coding	951.007	-0.652485	0.101586	-6.42296	1.33648e-10	1.15086e-09
FANCC	ENSG00000158169.7	protein_coding	138.676	-1.65937	0.258386	-6.42204	1.3446e-10	1.15725e-09
ROBO1	ENSG00000169855.15	protein_coding	518.681	0.824014	0.128333	6.42088	1.35487e-10	1.16547e-09
RP11-122K13.12	ENSG00000235245.1	antisense	52.2567	2.62686	0.409537	6.41423	1.41538e-10	1.21689e-09
TECR	ENSG00000099797.7	protein_coding	2362.59	-0.405365	0.0632446	-6.40948	1.4602e-10	1.25476e-09
FHOD1	ENSG00000135723.9	protein_coding	763.469	0.67517	0.105389	6.40642	1.48973e-10	1.27947e-09
RDH11	ENSG00000072042.8	protein_coding	1772.88	-0.473418	0.0739012	-6.40609	1.49296e-10	1.28157e-09
HP1BP3	ENSG00000127483.13	protein_coding	1813.81	-0.48456	0.075723	-6.39911	1.56284e-10	1.34085e-09
MSL1	ENSG00000188895.7	protein_coding	860.546	0.685289	0.107161	6.39497	1.60582e-10	1.37701e-09
RASGRP3	ENSG00000152689.13	protein_coding	47.5785	-2.95221	0.461732	-6.39377	1.61843e-10	1.38709e-09
IFITM10	ENSG00000244242.1	protein_coding	188.611	1.42575	0.22324	6.38663	1.6958e-10	1.45264e-09
SUPT5H	ENSG00000196235.9	protein_coding	2073.89	0.440751	0.0690225	6.38562	1.70709e-10	1.46155e-09
COL9A2	ENSG00000049089.9	protein_coding	82.1256	-2.23408	0.350023	-6.38265	1.74048e-10	1.48936e-09
RGL2	ENSG00000237441.5	protein_coding	692.251	0.779281	0.122099	6.38236	1.74375e-10	1.49138e-09
ROCK1	ENSG00000067900.6	protein_coding	1337.76	0.544581	0.0853581	6.37995	1.7714e-10	1.51424e-09
VPS13A	ENSG00000197969.7	protein_coding	402.429	0.936369	0.146832	6.37713	1.80442e-10	1.54166e-09
RP11-218E20.5	ENSG00000258745.1	antisense	260.765	1.16636	0.182932	6.37592	1.81863e-10	1.55299e-09
NISCH	ENSG00000010322.11	protein_coding	536.067	0.796931	0.125096	6.37057	1.88326e-10	1.60734e-09
LOXL2	ENSG00000134013.11	protein_coding	3260.03	-0.330667	0.0519113	-6.36985	1.8921e-10	1.61405e-09
TTPAL	ENSG00000124120.6	protein_coding	578.735	0.770119	0.120927	6.36847	1.90918e-10	1.62777e-09
LRRC59	ENSG00000108829.9	protein_coding	2471.04	-0.381564	0.0599172	-6.36819	1.91268e-10	1.62991e-09
FH	ENSG00000091483.6	protein_coding	795.508	-0.695366	0.109214	-6.36699	1.9277e-10	1.64185e-09
UGGT2	ENSG00000102595.14	protein_coding	167.477	1.44133	0.226408	6.36608	1.93921e-10	1.65079e-09
FOXP1	ENSG00000114861.14	protein_coding	825.939	0.647329	0.101702	6.36493	1.95375e-10	1.66231e-09
TNS4	ENSG00000131746.8	protein_coding	32.7026	3.43401	0.53971	6.36269	1.98248e-10	1.68588e-09
ZNF581	ENSG00000171425.5	protein_coding	287.615	1.15147	0.181016	6.36117	2.00227e-10	1.70182e-09
ATP6V0A2	ENSG00000185344.9	protein_coding	481.107	-0.92135	0.144869	-6.35986	2.01934e-10	1.71545e-09
VPS25	ENSG00000131475.2	protein_coding	643.721	-0.74515	0.117312	-6.35188	2.12703e-10	1.80599e-09
GLIPR1	ENSG00000139278.5	protein_coding	832.363	-0.656003	0.103322	-6.34909	2.1659e-10	1.83804e-09
NOTCH1	ENSG00000148400.9	protein_coding	399.168	0.92364	0.145578	6.34465	2.22929e-10	1.89086e-09
ARID4B	ENSG00000054267.16	protein_coding	582.331	0.771063	0.121588	6.34159	2.27407e-10	1.92784e-09
ZCCHC9	ENSG00000131732.7	protein_coding	469.16	-0.862322	0.136092	-6.33632	2.35313e-10	1.99383e-09
KIF11	ENSG00000138160.4	protein_coding	324.562	-1.0416	0.164427	-6.33473	2.37752e-10	2.01346e-09
MYO19	ENSG00000141140.12	protein_coding	401.505	-0.928846	0.146688	-6.33212	2.41818e-10	2.04684e-09
USF2	ENSG00000105698.11	protein_coding	2291.37	-0.409635	0.0647137	-6.32996	2.4522e-10	2.07456e-09
XRCC2	ENSG00000196584.2	protein_coding	61.7482	-2.50885	0.396467	-6.32802	2.48328e-10	2.09977e-09
NREP	ENSG00000134986.9	protein_coding	253.45	1.17836	0.186314	6.32462	2.53862e-10	2.14546e-09
CDK1	ENSG00000170312.11	protein_coding	379.362	-0.985708	0.155872	-6.32382	2.55179e-10	2.15548e-09
MVK	ENSG00000110921.7	protein_coding	652.218	-0.728723	0.115253	-6.32283	2.56823e-10	2.16825e-09
VPS13B	ENSG00000132549.14	protein_coding	546.822	0.785411	0.124298	6.31876	2.63663e-10	2.22484e-09
SEMA3E	ENSG00000170381.8	protein_coding	37.332	-3.39321	0.537063	-6.31809	2.64816e-10	2.23342e-09
RBM24	ENSG00000112183.10	protein_coding	64.147	-2.45837	0.389151	-6.31726	2.6625e-10	2.24436e-09
ZNF160	ENSG00000170949.13	protein_coding	375.881	0.985711	0.156066	6.316	2.68426e-10	2.26154e-09
RP11-27M24.1	ENSG00000256013.1	antisense	195.604	1.3244	0.209803	6.31257	2.74445e-10	2.31107e-09
SLIT2	ENSG00000145147.15	protein_coding	234.237	-1.22735	0.194545	-6.30881	2.81183e-10	2.36659e-09
SLFN5	ENSG00000166750.5	protein_coding	301.81	1.07447	0.170458	6.30342	2.9115e-10	2.44922e-09
FHL1	ENSG00000022267.12	protein_coding	489.793	-0.848568	0.134667	-6.30125	2.9526e-10	2.48252e-09
AC112721.2	ENSG00000222032.1	lincRNA	25.1756	3.72319	0.590895	6.30094	2.95847e-10	2.48618e-09
VLDLR	ENSG00000147852.11	protein_coding	546.827	0.788639	0.125255	6.29625	3.0493e-10	2.5612e-09
PAPOLA	ENSG00000090060.13	protein_coding	2796.97	0.350108	0.0556139	6.29532	3.06758e-10	2.57523e-09
PDAP1	ENSG00000106244.8	protein_coding	1286.56	-0.532694	0.0846765	-6.29093	3.15563e-10	2.64779e-09
GPSM2	ENSG00000121957.8	protein_coding	834.464	0.665348	0.105768	6.29063	3.16182e-10	2.65162e-09
TUBB6	ENSG00000176014.8	protein_coding	3155.46	-0.329087	0.0523169	-6.29026	3.16926e-10	2.65651e-09
PDGFD	ENSG00000170962.8	protein_coding	56.1213	-2.66604	0.424177	-6.28521	3.27405e-10	2.74294e-09
ZNF470	ENSG00000197016.7	protein_coding	162.998	1.41699	0.225487	6.28416	3.29636e-10	2.76022e-09
CTC-510F12.6	ENSG00000267576.1	sense_intronic	65.4727	2.23545	0.35579	6.28307	3.31954e-10	2.77821e-09
CCDC86	ENSG00000110104.7	protein_coding	833.359	-0.6489	0.103291	-6.28223	3.33743e-10	2.79176e-09
RP5-956O18.3	ENSG00000224407.1	antisense	297.553	1.05589	0.168143	6.27974	3.39132e-10	2.83539e-09
PTK7	ENSG00000112655.11	protein_coding	1234.41	-0.538651	0.0858144	-6.27693	3.45325e-10	2.88569e-09
RSBN1	ENSG00000081019.9	protein_coding	217.393	1.23453	0.196698	6.27625	3.4683e-10	2.89679e-09
EPB41L2	ENSG00000079819.12	protein_coding	575.455	-0.782468	0.124756	-6.27199	3.56456e-10	2.97568e-09
TPM1	ENSG00000140416.15	protein_coding	766.233	-0.669583	0.106776	-6.2709	3.58976e-10	2.99366e-09
GAN	ENSG00000261609.3	protein_coding	142.559	1.53723	0.245135	6.27096	3.58821e-10	2.99366e-09
ZMYM2	ENSG00000121741.12	protein_coding	273.384	1.17486	0.187452	6.26752	3.66836e-10	3.05765e-09
LMNA	ENSG00000160789.15	protein_coding	5015.07	0.261095	0.0416628	6.26685	3.68421e-10	3.0693e-09
MSMO1	ENSG00000052802.8	protein_coding	2535.93	-0.365067	0.0583105	-6.26073	3.83171e-10	3.19056e-09
TUBA1A	ENSG00000167552.9	protein_coding	1324.27	0.50244	0.0802973	6.25724	3.91851e-10	3.26118e-09
LATS1	ENSG00000131023.8	protein_coding	321.21	1.02005	0.16307	6.25533	3.96689e-10	3.29976e-09
NUP50	ENSG00000093000.14	protein_coding	615.552	-0.755884	0.120845	-6.25498	3.9757e-10	3.30542e-09
DCAF5	ENSG00000139990.13	protein_coding	1118.5	0.542206	0.0867032	6.25359	4.01135e-10	3.33337e-09
MAPK1IP1L	ENSG00000168175.10	protein_coding	2648.92	0.356696	0.0570398	6.25346	4.01461e-10	3.33438e-09
ST6GALNAC2	ENSG00000070731.5	protein_coding	948.169	0.615385	0.0984119	6.25315	4.02244e-10	3.3392e-09
SRSF2	ENSG00000161547.10	protein_coding	1249.38	-0.521726	0.0834545	-6.25162	4.06226e-10	3.37055e-09
ERCC6L	ENSG00000186871.5	protein_coding	117.373	-1.92677	0.308334	-6.24896	4.13183e-10	3.42653e-09
ZNF460	ENSG00000197714.4	protein_coding	44.935	2.84853	0.455974	6.24715	4.18021e-10	3.4649e-09
TOB2	ENSG00000183864.4	protein_coding	501.091	0.840457	0.134549	6.24647	4.19832e-10	3.47815e-09
SEMA3A	ENSG00000075213.6	protein_coding	277.044	-1.16664	0.186823	-6.24464	4.24772e-10	3.5173e-09
ZCCHC2	ENSG00000141664.5	protein_coding	190.58	1.36178	0.21833	6.23724	4.4535e-10	3.68583e-09
LPCAT4	ENSG00000176454.9	protein_coding	666.478	0.696946	0.111746	6.23686	4.4645e-10	3.69307e-09
TRIM6	ENSG00000121236.15	protein_coding	52.7363	-2.69225	0.431736	-6.23587	4.49282e-10	3.71463e-09
RPS6KA1	ENSG00000117676.9	protein_coding	393.606	-0.933847	0.149811	-6.23349	4.56164e-10	3.76962e-09
PCSK5	ENSG00000099139.9	protein_coding	61.3455	2.3452	0.376285	6.23251	4.59017e-10	3.78937e-09
BTN2A2	ENSG00000124508.12	protein_coding	313.986	-1.04375	0.167467	-6.23255	4.58891e-10	3.78937e-09
C12orf23	ENSG00000151135.5	protein_coding	1345.98	0.505248	0.0811405	6.22683	4.75967e-10	3.92733e-09
EREG	ENSG00000124882.3	protein_coding	80.1822	2.0149	0.323748	6.22366	4.85693e-10	4.00556e-09
SC5D	ENSG00000109929.5	protein_coding	678.655	-0.700062	0.112495	-6.22303	4.8763e-10	4.01951e-09
RP11-93B14.5	ENSG00000232803.1	antisense	437.508	0.865587	0.139128	6.22152	4.92368e-10	4.05653e-09
PLXNB3	ENSG00000198753.7	protein_coding	88.3456	1.97054	0.316903	6.21813	5.03113e-10	4.14297e-09
GPX4	ENSG00000167468.12	protein_coding	3754.15	0.308724	0.0496512	6.21785	5.04016e-10	4.14832e-09
RP11-536C5.7	ENSG00000227741.1	antisense	172.593	-1.48607	0.239146	-6.21405	5.16346e-10	4.24767e-09
CAP1	ENSG00000131236.12	protein_coding	5852.24	0.268769	0.0432663	6.21197	5.23247e-10	4.30228e-09
FYTTD1	ENSG00000122068.8	protein_coding	814.775	0.633838	0.102051	6.21102	5.26426e-10	4.32625e-09
RP11-800A3.4	ENSG00000260401.1	sense_overlapping	75.3341	2.10361	0.338764	6.20967	5.30976e-10	4.36146e-09
AFF4	ENSG00000072364.8	protein_coding	1886.02	0.415431	0.0669321	6.20676	5.40881e-10	4.44059e-09
TCEAL4	ENSG00000133142.13	protein_coding	1706.67	-0.445526	0.0717861	-6.2063	5.42461e-10	4.45133e-09
PLOD3	ENSG00000106397.7	protein_coding	991.543	0.573573	0.0924342	6.2052	5.46258e-10	4.48024e-09
NAB1	ENSG00000138386.12	protein_coding	340.682	0.99478	0.160335	6.2044	5.49069e-10	4.50104e-09
[truncated: 17,022 more rows]

## Sheet: 5DSph vs Adh
Gene Symbol	Gencode	Biotype	baseMean	log2FoldChange	lfcSE	stat	pvalue	padj
SLAMF7	ENSG00000026751.12	protein_coding	1687.25	-3.63002	0.0928044	-39.1147	0	0
TIMP2	ENSG00000035862.8	protein_coding	9801.11	-1.31522	0.0290651	-45.2507	0	0
AKR1B1	ENSG00000085662.9	protein_coding	3204.64	-2.07206	0.0519164	-39.9114	0	0
FKBP5	ENSG00000096060.10	protein_coding	4838.98	4.73345	0.0574651	82.3709	0	0
TIMP3	ENSG00000100234.11	protein_coding	9352.89	-1.41107	0.0310596	-45.4309	0	0
NDRG1	ENSG00000104419.10	protein_coding	10151	1.61609	0.0278967	57.9311	0	0
NAMPT	ENSG00000105835.7	protein_coding	8237.96	1.18777	0.0298747	39.7584	0	0
SERPINE1	ENSG00000106366.7	protein_coding	4456	2.22548	0.0417434	53.3134	0	0
DKK1	ENSG00000107984.5	protein_coding	3069.07	-2.52498	0.0564289	-44.7463	0	0
CPD	ENSG00000108582.7	protein_coding	7183.11	2.98699	0.0355453	84.0332	0	0
FN1	ENSG00000115414.14	protein_coding	17659.4	3.10835	0.0285495	108.876	0	0
ERRFI1	ENSG00000116285.8	protein_coding	16399.2	1.82349	0.0288233	63.2644	0	0
TXNIP	ENSG00000117289.7	protein_coding	1986.9	5.37498	0.102598	52.3886	0	0
AHNAK	ENSG00000124942.9	protein_coding	20194.8	2.6302	0.0243256	108.125	0	0
AKAP12	ENSG00000131016.12	protein_coding	1248.85	4.49513	0.104883	42.8584	0	0
LDHA	ENSG00000134333.9	protein_coding	22050	1.37548	0.0208544	65.9564	0	0
IGFBP4	ENSG00000141753.5	protein_coding	19500.5	1.12535	0.0262248	42.9116	0	0
CYR61	ENSG00000142871.11	protein_coding	7711.04	-1.91659	0.0347087	-55.2192	0	0
MCL1	ENSG00000143384.8	protein_coding	6488.09	2.20389	0.0345715	63.7486	0	0
SLC20A1	ENSG00000144136.6	protein_coding	6825.8	2.65459	0.0369572	71.8287	0	0
ANKRD1	ENSG00000148677.6	protein_coding	7593.11	-2.48304	0.0371892	-66.7678	0	0
EEF1A1	ENSG00000156508.13	protein_coding	121398	-0.898654	0.0145867	-61.6076	0	0
ITGA5	ENSG00000161638.6	protein_coding	4935.83	2.48821	0.0416218	59.7815	0	0
AXL	ENSG00000167601.7	protein_coding	6361.67	-1.63382	0.0357221	-45.7369	0	0
SLC3A2	ENSG00000168003.12	protein_coding	4561.01	-1.83793	0.0432225	-42.5226	0	0
DDIT4	ENSG00000168209.4	protein_coding	4618.49	2.18477	0.0423251	51.6188	0	0
MARCKSL1	ENSG00000175130.6	protein_coding	3779.48	1.96413	0.0435377	45.1134	0	0
PLEC	ENSG00000178209.10	protein_coding	17599.8	1.72149	0.0230158	74.7959	0	0
TUBB	ENSG00000196230.8	protein_coding	20517.7	-0.891924	0.0218027	-40.9088	0	0
DYNC1H1	ENSG00000197102.6	protein_coding	14336.6	0.918427	0.0240733	38.1513	0	0
TGM2	ENSG00000198959.7	protein_coding	4805.33	2.51188	0.0417685	60.1382	0	0
MT-RNR2	ENSG00000210082.2	Mt_rRNA	119127	1.50295	0.0145214	103.498	0	0
MT-RNR1	ENSG00000211459.2	Mt_rRNA	27920.9	2.61484	0.0212184	123.235	0	0
CTD-2328D6.1	ENSG00000226958.1	pseudogene	3536.77	4.01025	0.058251	68.8443	0	0
RP11-442H21.2	ENSG00000269926.1	antisense	3026.66	2.1405	0.0502748	42.5761	0	0
TSC22D3	ENSG00000157514.12	protein_coding	1308.05	3.15037	0.0839921	37.5079	6.84013e-308	3.04443e-305
PEA15	ENSG00000162734.8	protein_coding	4343.26	-1.62663	0.0433988	-37.4811	1.87352e-307	8.11337e-305
MT1X	ENSG00000187193.8	protein_coding	1706.1	2.49611	0.0679218	36.7497	1.17517e-295	4.95522e-293
MALAT1	ENSG00000251562.3	lincRNA	1147.71	3.20498	0.0874751	36.6387	6.9149e-294	2.84096e-291
HSPH1	ENSG00000120694.15	protein_coding	3407.92	-1.75335	0.0497472	-35.2452	4.06992e-272	1.63031e-269
NRP1	ENSG00000099250.13	protein_coding	4680.13	1.40226	0.0402174	34.8669	2.35826e-266	9.21621e-264
MT-ND5	ENSG00000198786.2	protein_coding	47142.5	0.667427	0.0191781	34.8015	2.3045e-265	8.79169e-263
RRBP1	ENSG00000125844.11	protein_coding	6741.23	1.0994	0.0321006	34.2487	4.55887e-257	1.69876e-254
DUSP6	ENSG00000139318.7	protein_coding	6527.45	1.15018	0.0338797	33.9489	1.26647e-252	4.61196e-250
H6PD	ENSG00000049239.8	protein_coding	1518.2	2.36663	0.0703334	33.6488	3.2476e-248	1.15636e-245
RN7SK	ENSG00000202198.1	misc_RNA	744.334	5.12074	0.154653	33.1112	2.05328e-240	7.15212e-238
THBS1	ENSG00000137801.9	protein_coding	3086.8	1.62054	0.0489676	33.094	3.62063e-240	1.23433e-237
APP	ENSG00000142192.16	protein_coding	14094.9	-0.843307	0.025561	-32.9919	1.06044e-238	3.53989e-236
LTBP1	ENSG00000049323.11	protein_coding	2154.6	1.95718	0.0596171	32.8291	2.2623e-236	7.39771e-234
TGFBR2	ENSG00000163513.13	protein_coding	3779.21	1.40774	0.043221	32.5708	1.06201e-232	3.4033e-230
BIRC3	ENSG00000023445.9	protein_coding	861.378	3.40863	0.105028	32.4545	4.67715e-231	1.46945e-228
ENPP1	ENSG00000197594.7	protein_coding	3194.34	1.79684	0.0553758	32.4482	5.7516e-231	1.77227e-228
PPP1R15A	ENSG00000087074.7	protein_coding	3343.46	-1.5803	0.0487399	-32.4232	1.29448e-230	3.91348e-228
DST	ENSG00000151914.13	protein_coding	7243.73	1.00124	0.0313961	31.8905	3.61431e-223	1.07245e-220
CALR	ENSG00000179218.9	protein_coding	21002.6	-0.684961	0.0216948	-31.5726	8.78707e-219	2.55991e-216
SQSTM1	ENSG00000161011.15	protein_coding	6963.26	-1.02604	0.0334246	-30.697	6.23763e-207	1.78474e-204
KRT19	ENSG00000171345.9	protein_coding	5948.5	1.0415	0.0341057	30.5375	8.27858e-205	2.32715e-202
RHOB	ENSG00000143878.8	protein_coding	849.21	2.98409	0.0984435	30.3127	7.80294e-202	2.15563e-199
ACSL1	ENSG00000151726.9	protein_coding	1734.02	1.89094	0.0631299	29.9531	4.00761e-197	1.08837e-194
MT-CYB	ENSG00000198727.2	protein_coding	28011.5	0.595882	0.0199755	29.8306	1.56593e-195	4.18182e-193
MMP14	ENSG00000157227.8	protein_coding	6819.52	0.959118	0.0324353	29.5702	3.61433e-192	9.49383e-190
CDC42BPA	ENSG00000143776.14	protein_coding	3135.26	1.40772	0.0477261	29.4957	3.26837e-191	8.44663e-189
NNMT	ENSG00000166741.3	protein_coding	929.007	2.94149	0.0997334	29.4935	3.48501e-191	8.86354e-189
ANGPTL4	ENSG00000167772.7	protein_coding	839.835	7.03501	0.242077	29.061	1.11772e-185	2.79833e-183
BNIP3	ENSG00000176171.7	protein_coding	2731.25	1.42494	0.0495935	28.7324	1.50215e-181	3.70292e-179
MT-ND4	ENSG00000198886.2	protein_coding	110089	0.429057	0.0150624	28.4854	1.77806e-178	4.31664e-176
GAPDH	ENSG00000111640.10	protein_coding	30703.7	0.546448	0.019224	28.4252	9.86917e-178	2.3602e-175
SPRY4	ENSG00000187678.8	protein_coding	2477.76	1.51081	0.0531535	28.4236	1.03373e-177	2.4358e-175
NOX5	ENSG00000255346.5	protein_coding	541.189	5.09273	0.179225	28.4153	1.30991e-177	3.04184e-175
CRIM1	ENSG00000150938.5	protein_coding	3055.42	-1.38222	0.0493649	-28.0001	1.61966e-172	3.7074e-170
ABLIM3	ENSG00000173210.15	protein_coding	1255.98	2.07991	0.0746178	27.8741	5.496e-171	1.24031e-168
VIPR1	ENSG00000114812.8	protein_coding	1081.6	2.56235	0.0926103	27.6681	1.689e-168	3.75873e-166
MT-CO2	ENSG00000198712.1	protein_coding	79812.3	0.465964	0.0168822	27.601	1.08301e-167	2.37714e-165
VSTM2L	ENSG00000132821.7	protein_coding	1416.29	2.22035	0.0806925	27.5161	1.1261e-166	2.43832e-164
PTPRJ	ENSG00000149177.8	protein_coding	1137.98	2.17489	0.0791077	27.4928	2.13785e-166	4.5673e-164
NOV	ENSG00000136999.4	protein_coding	874.497	-3.05966	0.111528	-27.434	1.07866e-165	2.27412e-163
ATP1B1	ENSG00000143153.8	protein_coding	4925.5	-1.05874	0.0387282	-27.3376	1.51678e-164	3.15628e-162
ITGA6	ENSG00000091409.10	protein_coding	3797.89	1.1847	0.0435555	27.1998	6.53648e-163	1.34274e-160
ITGB4	ENSG00000132470.9	protein_coding	2235.62	1.51617	0.055969	27.0895	1.30882e-161	2.65459e-159
S100A10	ENSG00000197747.4	protein_coding	4581.48	1.03861	0.0386041	26.9042	1.95996e-159	3.92556e-157
ANXA3	ENSG00000138772.8	protein_coding	2344.86	-1.51802	0.0566284	-26.8067	2.69682e-158	5.33472e-156
PGK1	ENSG00000102144.9	protein_coding	10157.3	0.737808	0.0276872	26.648	1.88954e-156	3.69221e-154
COL6A3	ENSG00000163359.11	protein_coding	494.993	3.93964	0.148035	26.6129	4.80951e-156	9.28466e-154
MT-ND6	ENSG00000198695.2	protein_coding	14881.2	0.71714	0.0269768	26.5836	1.05089e-155	2.00458e-153
TMSB4X	ENSG00000205542.6	protein_coding	21647.9	-0.60272	0.0226958	-26.5565	2.16169e-155	4.07492e-153
QSOX1	ENSG00000116260.12	protein_coding	5650.39	-0.962625	0.0362557	-26.551	2.50345e-155	4.66428e-153
SCD	ENSG00000099194.5	protein_coding	16131.3	0.618682	0.0233534	26.4922	1.19195e-154	2.19524e-152
EFNB2	ENSG00000125266.6	protein_coding	750.326	2.81282	0.106845	26.3261	9.64098e-153	1.75543e-150
XXbac-BPG252P9.9	ENSG00000272540.1	antisense	6745.31	-0.905019	0.034505	-26.2287	1.25181e-151	2.25368e-149
TFRC	ENSG00000072274.8	protein_coding	1889.18	-1.66428	0.0638743	-26.0556	1.1632e-149	2.07088e-147
SLC7A5	ENSG00000103257.4	protein_coding	4798.65	-1.02491	0.0394305	-25.9927	5.98516e-149	1.05385e-146
PSAP	ENSG00000197746.9	protein_coding	12114.9	-0.681613	0.0263661	-25.8519	2.31559e-147	4.03291e-145
DNMBP	ENSG00000107554.11	protein_coding	3155.17	1.25717	0.0489104	25.7035	1.06878e-145	1.8414e-143
H2AFZ	ENSG00000164032.7	protein_coding	3000.14	-1.30907	0.0511647	-25.5853	2.22225e-144	3.788e-142
TNIP1	ENSG00000145901.10	protein_coding	4896.2	0.968252	0.0378986	25.5485	5.7043e-144	9.62106e-142
CCND3	ENSG00000112576.8	protein_coding	2265.34	1.38011	0.0541394	25.4918	2.42758e-143	4.05178e-141
ATP2B4	ENSG00000058668.10	protein_coding	1036.73	2.20677	0.0867576	25.436	1.0075e-142	1.66425e-140
GDF15	ENSG00000130513.6	protein_coding	1018.7	-2.46144	0.0979549	-25.1283	2.43955e-139	3.98867e-137
ANXA2	ENSG00000182718.12	protein_coding	23944.3	0.527139	0.0209993	25.1027	4.64646e-139	7.52023e-137
RPLP0	ENSG00000089157.11	protein_coding	21893.4	-0.541804	0.0217422	-24.9194	4.58147e-137	7.34088e-135
TOP1	ENSG00000198900.5	protein_coding	2547.24	1.26921	0.0511012	24.8372	3.55819e-136	5.64483e-134
ALPP	ENSG00000163283.6	protein_coding	660.85	-3.36112	0.135743	-24.761	2.36008e-135	3.70741e-133
AMIGO2	ENSG00000139211.5	protein_coding	994.939	-2.36862	0.0957017	-24.75	3.09718e-135	4.81807e-133
FAM129B	ENSG00000136830.7	protein_coding	5803.85	0.945354	0.0382251	24.7312	4.93476e-135	7.60285e-133
ACSL3	ENSG00000123983.9	protein_coding	3106.45	1.13401	0.0460167	24.6435	4.32226e-134	6.59577e-132
DOCK9	ENSG00000088387.13	protein_coding	2289.25	-1.4637	0.0594241	-24.6314	5.81702e-134	8.79303e-132
FTL	ENSG00000087086.9	protein_coding	18148.7	-0.566528	0.0230157	-24.6148	8.77096e-134	1.31343e-131
ITGB1	ENSG00000150093.14	protein_coding	12756.7	0.620319	0.0252378	24.579	2.11843e-133	3.14293e-131
HMGB3	ENSG00000029993.10	protein_coding	3197.83	1.13074	0.0460158	24.5729	2.46057e-133	3.61703e-131
MYADM	ENSG00000179820.11	protein_coding	2901.16	1.23292	0.0504763	24.4257	9.1202e-132	1.32848e-129
HMGA1	ENSG00000137309.15	protein_coding	22739.5	-0.50526	0.0207419	-24.3594	4.60975e-131	6.65423e-129
RPL10	ENSG00000147403.12	protein_coding	7828.89	-0.869017	0.0357472	-24.3101	1.53354e-130	2.19392e-128
CHAC1	ENSG00000128965.7	protein_coding	1098.71	-2.18055	0.0899586	-24.2394	8.54353e-130	1.21144e-127
TMSB10	ENSG00000034510.4	protein_coding	11034.1	0.686839	0.0283722	24.2082	1.82398e-129	2.56365e-127
PAWR	ENSG00000177425.6	protein_coding	1287.98	-1.88174	0.0783672	-24.0118	2.09288e-127	2.91601e-125
LDLR	ENSG00000130164.7	protein_coding	8300.89	0.729329	0.0304995	23.9128	2.25421e-126	3.11373e-124
MAP4K4	ENSG00000071054.11	protein_coding	2732.65	1.20938	0.0506973	23.8549	8.9974e-126	1.23218e-123
CD55	ENSG00000196352.9	protein_coding	4723.83	-0.991284	0.0416563	-23.7967	3.61164e-125	4.90418e-123
CCDC88A	ENSG00000115355.11	protein_coding	1348.39	1.77465	0.0747441	23.7429	1.29947e-124	1.7497e-122
SCNN1A	ENSG00000111319.8	protein_coding	386.268	3.89295	0.165021	23.5907	4.80059e-123	6.36853e-121
Z98256.1	ENSG00000183531.1	pseudogene	2004.11	-1.44471	0.0612408	-23.5906	4.80929e-123	6.36853e-121
PRRC2C	ENSG00000117523.11	protein_coding	3733.39	1.10181	0.0467377	23.5743	7.08042e-123	9.29915e-121
TIMP1	ENSG00000102265.7	protein_coding	4452.89	0.966906	0.0411836	23.4779	6.85898e-122	8.93508e-120
IQGAP1	ENSG00000140575.8	protein_coding	4078.96	0.953	0.0406285	23.4565	1.13594e-121	1.46783e-119
NCF2	ENSG00000116701.10	protein_coding	777.726	-2.58015	0.110047	-23.4459	1.45438e-121	1.86429e-119
ZMYND8	ENSG00000101040.15	protein_coding	1681.04	1.49574	0.0644732	23.1995	4.61175e-119	5.8646e-117
ATP1A1	ENSG00000163399.11	protein_coding	17733.8	0.5113	0.02207	23.1671	9.77015e-119	1.23265e-116
FLNB	ENSG00000136068.10	protein_coding	9420.06	0.669976	0.0289286	23.1597	1.16162e-118	1.45412e-116
EXT1	ENSG00000182197.6	protein_coding	4237.74	-0.967486	0.0417764	-23.1587	1.18885e-118	1.47666e-116
SHMT2	ENSG00000182199.6	protein_coding	3320.79	-1.13613	0.04931	-23.0405	1.83104e-117	2.25682e-115
ZFP36L2	ENSG00000152518.5	protein_coding	930.577	2.06786	0.0899077	22.9998	4.68248e-117	5.72729e-115
FST	ENSG00000134363.7	protein_coding	552.824	-3.43871	0.149757	-22.962	1.11816e-116	1.3573e-114
MORC4	ENSG00000133131.10	protein_coding	1846.73	1.44901	0.0632083	22.9243	2.65934e-116	3.2038e-114
ATP1B3	ENSG00000069849.6	protein_coding	1788.77	-1.46396	0.0642051	-22.8014	4.44315e-115	5.31288e-113
KMT2C	ENSG00000055609.13	protein_coding	1006.17	1.94286	0.0852659	22.7858	6.33514e-115	7.46382e-113
TPM4	ENSG00000167460.10	protein_coding	11229.2	0.598751	0.0262772	22.7859	6.32156e-115	7.46382e-113
HIPK2	ENSG00000064393.11	protein_coding	777.586	2.13595	0.0951512	22.4479	1.34165e-111	1.56914e-109
COL5A1	ENSG00000130635.11	protein_coding	679.807	2.34666	0.105102	22.3273	2.00496e-110	2.32793e-108
GOLGB1	ENSG00000173230.11	protein_coding	1885.5	1.42469	0.064085	22.2312	1.71429e-109	1.97612e-107
TNRC6B	ENSG00000100354.16	protein_coding	607.694	2.53318	0.114554	22.1134	2.35093e-108	2.69063e-106
IDS	ENSG00000010404.13	protein_coding	3333.29	-1.00923	0.0460189	-21.9308	1.32228e-106	1.50261e-104
SH3D19	ENSG00000109686.12	protein_coding	5517.52	-0.790176	0.0361466	-21.8603	6.20379e-106	7.00023e-104
RN7SL1	ENSG00000258486.2	antisense	302.65	4.88575	0.22418	21.7939	2.65208e-105	2.97162e-103
RPS3A	ENSG00000145425.5	protein_coding	10799.9	-0.589	0.0272227	-21.6363	8.17715e-104	9.09878e-102
JAG1	ENSG00000101384.7	protein_coding	1106.89	1.68573	0.0781162	21.5797	2.78453e-103	3.077e-101
LAPTM5	ENSG00000162511.7	protein_coding	834.245	1.95435	0.0906456	21.5603	4.23687e-103	4.64982e-101
TBC1D2	ENSG00000095383.15	protein_coding	1065.42	-1.83819	0.0852608	-21.5596	4.30628e-103	4.69384e-101
KLHL4	ENSG00000102271.9	protein_coding	751.641	2.08256	0.0971716	21.4318	6.75902e-102	7.31755e-100
HLA-DRA	ENSG00000204287.9	protein_coding	380.898	3.32641	0.155238	21.4279	7.34763e-102	7.90141e-100
PKM	ENSG00000067225.13	protein_coding	26797.6	0.426651	0.0199127	21.426	7.64709e-102	8.16863e-100
LOX	ENSG00000113083.8	protein_coding	1876.78	1.28119	0.0601161	21.312	8.78699e-101	9.32411e-99
IARS	ENSG00000196305.13	protein_coding	5080.21	-0.875488	0.0412492	-21.2243	5.69258e-100	6.0008e-98
CTC-425F1.4	ENSG00000267458.1	antisense	1578.88	-1.45151	0.0685918	-21.1616	2.15644e-99	2.25834e-97
COL6A1	ENSG00000142156.10	protein_coding	1432.65	1.43625	0.0679271	21.144	3.13079e-99	3.25744e-97
FOSL1	ENSG00000175592.4	protein_coding	3904.84	-0.902443	0.0428899	-21.0409	2.76965e-98	2.86311e-96
STC1	ENSG00000159167.7	protein_coding	997.235	1.75328	0.0835347	20.9886	8.32797e-98	8.55378e-96
AL136376.1	ENSG00000269279.1	protein_coding	1122.91	1.60811	0.0766914	20.9687	1.26786e-97	1.29394e-95
RPS27	ENSG00000177954.7	protein_coding	3783.9	-0.912937	0.043542	-20.9668	1.31833e-97	1.33694e-95
SLK	ENSG00000065613.9	protein_coding	2181.51	1.1587	0.0553676	20.9274	3.01265e-97	3.03595e-95
MACF1	ENSG00000127603.19	protein_coding	4911.41	0.793268	0.0381202	20.8096	3.53974e-96	3.54482e-94
KISS1	ENSG00000170498.7	protein_coding	618.092	-2.49581	0.120351	-20.7377	1.58236e-95	1.57479e-93
MYOF	ENSG00000138119.12	protein_coding	10150.7	-0.569068	0.0274968	-20.6958	3.77828e-95	3.737e-93
IGFBP7	ENSG00000163453.7	protein_coding	3996.09	-0.882104	0.0428571	-20.5825	3.94198e-94	3.87499e-92
MT-ATP8	ENSG00000228253.1	protein_coding	8209.56	0.650136	0.0316087	20.5683	5.28117e-94	5.15977e-92
MAOA	ENSG00000189221.5	protein_coding	941.898	1.76411	0.0864052	20.4168	1.18695e-92	1.15264e-90
C6orf48	ENSG00000204387.8	protein_coding	1559.69	-1.43205	0.0701619	-20.4107	1.34464e-92	1.2979e-90
FAT1	ENSG00000083857.9	protein_coding	4817.86	0.822995	0.0403942	20.3741	2.8407e-92	2.72554e-90
TENC1	ENSG00000111077.13	protein_coding	585.825	2.28787	0.112364	20.3612	3.692e-92	3.52125e-90
ST3GAL1	ENSG00000008513.10	protein_coding	1376.31	1.43495	0.0705332	20.3443	5.22007e-92	4.94918e-90
ADAM8	ENSG00000151651.11	protein_coding	1745.72	1.23928	0.0609926	20.3186	8.80709e-92	8.30094e-90
HUWE1	ENSG00000086758.11	protein_coding	5469.43	0.766766	0.0378525	20.2567	3.10291e-91	2.90748e-89
RPS12	ENSG00000112306.7	protein_coding	5213.14	-0.74802	0.0369903	-20.222	6.26434e-91	5.83567e-89
BHLHE40	ENSG00000134107.4	protein_coding	1959.47	1.18439	0.0585717	20.2211	6.38403e-91	5.91279e-89
CD74	ENSG00000019582.10	protein_coding	1886.64	1.24526	0.0615976	20.216	7.08047e-91	6.52013e-89
DDAH1	ENSG00000153904.14	protein_coding	1034.47	-1.73342	0.0859945	-20.1573	2.32115e-90	2.12524e-88
GNB2L1	ENSG00000204628.7	protein_coding	15532.6	-0.470191	0.0233958	-20.0973	7.79576e-90	7.09724e-88
CAP1	ENSG00000131236.12	protein_coding	6722.48	0.734523	0.0366859	20.0219	3.54652e-89	3.2105e-87
RGS2	ENSG00000116741.6	protein_coding	276.71	4.03517	0.201921	19.9839	7.61036e-89	6.85061e-87
GLUL	ENSG00000135821.12	protein_coding	3380.12	0.893821	0.0447301	19.9825	7.81566e-89	6.99611e-87
LOXL4	ENSG00000138131.3	protein_coding	1070.69	1.73563	0.0869124	19.9699	1.00665e-88	8.96087e-87
C5orf45	ENSG00000161010.10	protein_coding	3545.05	-0.920707	0.0461313	-19.9584	1.26703e-88	1.12164e-86
PINK1	ENSG00000158828.5	protein_coding	2453.99	-1.12546	0.0564226	-19.9469	1.59443e-88	1.40371e-86
PSAT1	ENSG00000135069.9	protein_coding	2759.74	-1.02189	0.0513122	-19.9151	3.00796e-88	2.63369e-86
LGALS3	ENSG00000131981.11	protein_coding	3963.26	0.807425	0.0405863	19.894	4.58577e-88	3.99336e-86
EIF1	ENSG00000173812.6	protein_coding	6162.01	-0.674601	0.0339307	-19.8818	5.85532e-88	5.07134e-86
GPRC5A	ENSG00000013588.5	protein_coding	2345.79	-1.08337	0.0549583	-19.7126	1.68105e-86	1.44815e-84
TSC22D1	ENSG00000102804.10	protein_coding	3240.9	0.883851	0.0448857	19.6912	2.56737e-86	2.19984e-84
IER3	ENSG00000137331.11	protein_coding	7983.1	-0.594933	0.0303879	-19.5779	2.38464e-85	2.0324e-83
ACSS2	ENSG00000131069.15	protein_coding	2929.88	0.950979	0.0486086	19.564	3.13365e-85	2.65664e-83
MKNK2	ENSG00000099875.10	protein_coding	1555.43	1.40047	0.071593	19.5615	3.2917e-85	2.77594e-83
PSG9	ENSG00000183668.13	protein_coding	355.646	-4.16057	0.213624	-19.4761	1.75015e-84	1.4682e-82
HPCAL1	ENSG00000115756.8	protein_coding	3982.43	0.848558	0.0435994	19.4626	2.27944e-84	1.90227e-82
S100A6	ENSG00000197956.5	protein_coding	31731.7	0.390305	0.0200729	19.4444	3.25359e-84	2.70116e-82
CUTA	ENSG00000112514.11	protein_coding	2392.74	-1.10411	0.0568689	-19.415	5.76481e-84	4.76131e-82
B4GALT1	ENSG00000086062.8	protein_coding	1838.9	1.15295	0.0594094	19.4068	6.76029e-84	5.55488e-82
ADAMTS9	ENSG00000163638.9	protein_coding	343.121	2.9584	0.153058	19.3286	3.08641e-83	2.52314e-81
DAPK1	ENSG00000196730.8	protein_coding	659.15	-2.20197	0.113927	-19.3279	3.12972e-83	2.54556e-81
LAMA5	ENSG00000130702.9	protein_coding	1819.59	1.15809	0.0600671	19.2799	7.92836e-83	6.41597e-81
TXNRD1	ENSG00000198431.11	protein_coding	5767.63	-0.672592	0.0349633	-19.2371	1.81167e-82	1.45871e-80
RPL15	ENSG00000174748.14	protein_coding	7647.72	-0.635237	0.0330229	-19.2363	1.83954e-82	1.47375e-80
AKAP13	ENSG00000170776.15	protein_coding	978.009	1.55415	0.0812475	19.1286	1.45846e-81	1.16263e-79
RPS5	ENSG00000083845.4	protein_coding	3478.27	-0.851178	0.0447565	-19.018	1.21088e-80	9.60493e-79
BPTF	ENSG00000171634.12	protein_coding	1399.57	1.36141	0.0717064	18.986	2.228e-80	1.75858e-78
TPR	ENSG00000047410.9	protein_coding	2787.47	0.930519	0.0491757	18.9223	7.46613e-80	5.86421e-78
AKAP9	ENSG00000127914.12	protein_coding	674.425	1.93054	0.102148	18.8995	1.15129e-79	8.99859e-78
NT5C2	ENSG00000076685.14	protein_coding	1879.97	-1.19677	0.0633355	-18.8957	1.23708e-79	9.62219e-78
TUBA1B	ENSG00000123416.11	protein_coding	3936.82	-0.821591	0.0435022	-18.8862	1.48081e-79	1.14623e-77
NCOR2	ENSG00000196498.9	protein_coding	2505.45	0.973292	0.0515434	18.883	1.57429e-79	1.21274e-77
RP5-940J5.9	ENSG00000269968.1	antisense	12091.2	0.511846	0.0271263	18.869	2.05271e-79	1.57371e-77
AJUBA	ENSG00000129474.11	protein_coding	1544.44	-1.2871	0.0684158	-18.8129	5.92323e-79	4.51942e-77
CAST	ENSG00000153113.19	protein_coding	4720.42	0.767715	0.041012	18.7193	3.44729e-78	2.61782e-76
MRPS6	ENSG00000243927.1	protein_coding	778.696	-1.86664	0.100019	-18.6629	9.92788e-78	7.50351e-76
WWTR1	ENSG00000018408.10	protein_coding	1276.91	1.34649	0.0727784	18.5013	2.01674e-76	1.5171e-74
GPX3	ENSG00000211445.7	protein_coding	656.305	1.92669	0.104217	18.4873	2.61547e-76	1.9583e-74
FNDC3B	ENSG00000075420.8	protein_coding	1757.05	1.14945	0.0623012	18.4498	5.23015e-76	3.8978e-74
GBP2	ENSG00000162645.8	protein_coding	544.423	2.06055	0.111722	18.4436	5.86665e-76	4.35191e-74
ALOX15B	ENSG00000179593.11	protein_coding	267.663	7.06142	0.383469	18.4146	1.00355e-75	7.4101e-74
KDM5B	ENSG00000117139.12	protein_coding	950.803	1.54168	0.0838666	18.3825	1.81358e-75	1.33243e-73
SDC4	ENSG00000124145.5	protein_coding	1757.05	1.16719	0.0634953	18.3823	1.82114e-75	1.33243e-73
MAP1B	ENSG00000131711.10	protein_coding	2493.57	0.953068	0.0518606	18.3775	1.98976e-75	1.44918e-73
RANGAP1	ENSG00000100401.15	protein_coding	1041.25	-1.53923	0.083946	-18.3359	4.27845e-75	3.10198e-73
NPC2	ENSG00000119655.4	protein_coding	2677.38	-0.946803	0.0516604	-18.3274	4.99976e-75	3.60861e-73
MUC5B	ENSG00000117983.13	protein_coding	208.375	4.81225	0.262681	18.3197	5.75784e-75	4.13712e-73
WARS	ENSG00000140105.13	protein_coding	3982.69	-0.791068	0.0432353	-18.2968	8.77203e-75	6.27474e-73
NUPR1	ENSG00000176046.7	protein_coding	555.378	-2.26435	0.124118	-18.2435	2.32998e-74	1.65926e-72
ELK3	ENSG00000111145.3	protein_coding	2207.96	0.995317	0.0546203	18.2225	3.42438e-74	2.42782e-72
UPP1	ENSG00000183696.9	protein_coding	538.612	-2.25937	0.124435	-18.1571	1.12869e-73	7.96697e-72
RAB13	ENSG00000143545.4	protein_coding	1243.93	1.33522	0.0735486	18.1542	1.18914e-73	8.35687e-72
VEGFA	ENSG00000112715.16	protein_coding	3400.68	0.835944	0.0463163	18.0486	8.09109e-73	5.66129e-71
PER1	ENSG00000179094.9	protein_coding	309.138	2.98934	0.165698	18.0409	9.30606e-73	6.48309e-71
EMP1	ENSG00000134531.5	protein_coding	3480.49	0.824526	0.0457121	18.0374	9.91103e-73	6.85302e-71
MOB3A	ENSG00000172081.9	protein_coding	1510.53	1.20642	0.0668848	18.0373	9.92261e-73	6.85302e-71
CUL7	ENSG00000044090.4	protein_coding	918.577	1.52044	0.0843283	18.03	1.13378e-72	7.79678e-71
TUBA1C	ENSG00000167553.10	protein_coding	3028.02	-0.956891	0.0531585	-18.0007	1.92364e-72	1.3172e-70
P4HA1	ENSG00000122884.8	protein_coding	1371.44	1.22577	0.0681916	17.9754	3.03861e-72	2.07182e-70
PTTG1IP	ENSG00000183255.7	protein_coding	9526.2	-0.513276	0.0286813	-17.8958	1.27128e-71	8.63127e-70
UBR5	ENSG00000104517.8	protein_coding	1550.05	1.17984	0.065986	17.8802	1.68278e-71	1.13769e-69
TAGLN2	ENSG00000158710.10	protein_coding	3606.77	-0.782321	0.0437966	-17.8626	2.30709e-71	1.55321e-69
S100A16	ENSG00000188643.6	protein_coding	3806.18	0.73851	0.0413504	17.8598	2.42596e-71	1.62641e-69
HAS2	ENSG00000170961.6	protein_coding	297.613	2.92414	0.164364	17.7906	8.35586e-71	5.57858e-69
PXDN	ENSG00000130508.6	protein_coding	4525.83	0.687077	0.0386846	17.761	1.41693e-70	9.42051e-69
BUB3	ENSG00000154473.13	protein_coding	2082.51	-1.04369	0.058843	-17.7368	2.17973e-70	1.44321e-68
HECTD1	ENSG00000092148.8	protein_coding	2961.28	0.837698	0.0472602	17.7252	2.67825e-70	1.76599e-68
KANK2	ENSG00000197256.6	protein_coding	1835.35	1.04694	0.059074	17.7226	2.80678e-70	1.84316e-68
DUSP14	ENSG00000161326.8	protein_coding	653.349	-2.01838	0.114024	-17.7014	4.08923e-70	2.67436e-68
GLG1	ENSG00000090863.7	protein_coding	1907.97	1.06691	0.0603632	17.6748	6.5584e-70	4.27176e-68
DYSF	ENSG00000135636.9	protein_coding	892.976	-1.64814	0.0932926	-17.6664	7.61513e-70	4.93997e-68
MCM7	ENSG00000166508.13	protein_coding	1157.37	-1.42001	0.0804304	-17.6552	9.28454e-70	5.99864e-68
CORO1C	ENSG00000110880.6	protein_coding	4901.53	-0.689058	0.0390354	-17.6521	9.79827e-70	6.30513e-68
RANBP2	ENSG00000153201.11	protein_coding	1058.42	1.38477	0.0784698	17.6471	1.07057e-69	6.86149e-68
RPL8	ENSG00000161016.11	protein_coding	12019.8	-0.48104	0.027265	-17.6432	1.14833e-69	7.33054e-68
CLTC	ENSG00000141367.7	protein_coding	6136.61	0.592941	0.0336725	17.6091	2.09801e-69	1.33398e-67
KIAA1109	ENSG00000138688.11	protein_coding	977.608	1.51406	0.0863695	17.5301	8.44736e-69	5.34989e-67
CANX	ENSG00000127022.10	protein_coding	15873.7	-0.407415	0.0232439	-17.5278	8.78882e-69	5.54422e-67
TUBB4B	ENSG00000188229.5	protein_coding	3006.79	-0.842309	0.048069	-17.5229	9.58218e-69	6.02099e-67
ZNF608	ENSG00000168916.11	protein_coding	348.177	2.53208	0.144734	17.4947	1.57345e-68	9.84818e-67
BIRC6	ENSG00000115760.9	protein_coding	1049.52	1.42893	0.0818677	17.4541	3.2025e-68	1.99664e-66
GCNT1	ENSG00000187210.8	protein_coding	458.198	2.16795	0.124318	17.4387	4.19301e-68	2.60405e-66
ADAMTS1	ENSG00000154734.10	protein_coding	585.278	-2.12483	0.121923	-17.4277	5.08536e-68	3.14605e-66
KIFC3	ENSG00000140859.11	protein_coding	1647.14	-1.1511	0.066202	-17.3876	1.02355e-67	6.30781e-66
LRP5	ENSG00000162337.7	protein_coding	2034.7	0.985378	0.0566732	17.387	1.0347e-67	6.3521e-66
CHD2	ENSG00000173575.14	protein_coding	1808	1.1013	0.0635471	17.3305	2.76934e-67	1.69363e-65
HIF1A	ENSG00000100644.12	protein_coding	5296.9	0.622827	0.0360105	17.2957	5.06839e-67	3.08786e-65
SLC1A5	ENSG00000105281.8	protein_coding	3341.2	-0.806038	0.0466702	-17.2709	7.7868e-67	4.72606e-65
TACSTD2	ENSG00000184292.5	protein_coding	1234.6	-1.37165	0.0795358	-17.2457	1.2055e-66	7.28897e-65
ARHGDIA	ENSG00000141522.7	protein_coding	5706.62	-0.636389	0.0369707	-17.2133	2.11025e-66	1.27115e-64
EVI2A	ENSG00000126860.7	protein_coding	406.092	-2.56429	0.149134	-17.1945	2.91804e-66	1.75115e-64
SHROOM2	ENSG00000146950.8	protein_coding	315.529	2.8117	0.163706	17.1753	4.06217e-66	2.42866e-64
PTK2	ENSG00000169398.15	protein_coding	3421.78	0.763764	0.0444779	17.1718	4.31923e-66	2.57275e-64
RP11-386G11.10	ENSG00000258017.1	antisense	3062.48	-0.821538	0.0479454	-17.1349	8.155e-66	4.83954e-64
NEBL	ENSG00000078114.14	protein_coding	202.13	3.89218	0.227353	17.1195	1.06094e-65	6.27287e-64
RP11-323N12.5	ENSG00000267601.1	antisense	1229.3	-1.32344	0.0774885	-17.0791	2.12224e-65	1.25017e-63
SEC14L2	ENSG00000100003.13	protein_coding	321.271	2.85047	0.167208	17.0474	3.65162e-65	2.14322e-63
CTNNA1	ENSG00000044115.16	protein_coding	9437.3	0.486523	0.0285831	17.0214	5.70396e-65	3.33557e-63
HEG1	ENSG00000173706.8	protein_coding	2206.12	-0.97861	0.0577191	-16.9547	1.77697e-64	1.03536e-62
AIM1	ENSG00000112297.10	protein_coding	452.347	2.08661	0.123138	16.9453	2.08369e-64	1.20967e-62
BNIP3L	ENSG00000104765.10	protein_coding	2200.66	0.933671	0.0551266	16.9368	2.40704e-64	1.39235e-62
DDX39A	ENSG00000123136.10	protein_coding	1006.65	-1.46761	0.0866754	-16.9322	2.60367e-64	1.50067e-62
LTA4H	ENSG00000111144.5	protein_coding	2003.62	0.95994	0.0567537	16.9142	3.53862e-64	2.03223e-62
TNFSF15	ENSG00000181634.7	protein_coding	258.004	-4.6359	0.274261	-16.9032	4.25818e-64	2.43674e-62
BDP1	ENSG00000145734.14	protein_coding	739.213	1.72356	0.102289	16.8498	1.05211e-63	5.99926e-62
GSTO1	ENSG00000148834.8	protein_coding	2016.97	-1.02212	0.0609601	-16.7671	4.24903e-63	2.41426e-61
CTGF	ENSG00000118523.5	protein_coding	2352.22	-1.0366	0.0618601	-16.7571	5.02547e-63	2.84534e-61
EIF5	ENSG00000100664.6	protein_coding	3605.62	-0.733234	0.0437677	-16.7528	5.39847e-63	3.04577e-61
RPL18	ENSG00000063177.8	protein_coding	4148.73	-0.684523	0.0408641	-16.7512	5.54894e-63	3.11967e-61
ESYT2	ENSG00000117868.11	protein_coding	4805.01	0.627117	0.0374813	16.7314	7.73416e-63	4.33302e-61
TRIP11	ENSG00000100815.8	protein_coding	971.315	1.36174	0.0814801	16.7125	1.06211e-62	5.92966e-61
CEP350	ENSG00000135837.11	protein_coding	768.556	1.60497	0.0963262	16.6618	2.48465e-62	1.38234e-60
PTPN14	ENSG00000152104.7	protein_coding	1623.41	1.05181	0.0633373	16.6066	6.24794e-62	3.46404e-60
SLC35D1	ENSG00000116704.6	protein_coding	438.643	2.05492	0.123768	16.603	6.6329e-62	3.66479e-60
CLIC1	ENSG00000213719.4	protein_coding	13563.6	0.45698	0.0275332	16.5974	7.27567e-62	4.00612e-60
KIAA1551	ENSG00000174718.7	protein_coding	621.071	1.72346	0.103928	16.5833	9.20968e-62	5.05365e-60
RSF1	ENSG00000048649.9	protein_coding	967.8	1.41067	0.0852258	16.5521	1.54573e-61	8.45297e-60
RP11-161H23.5	ENSG00000258232.2	antisense	1602.32	-1.10395	0.0667535	-16.5377	1.96305e-61	1.06986e-59
XXbac-BPG252P9.10	ENSG00000272273.1	antisense	1798.42	-1.05866	0.0640177	-16.5371	1.98477e-61	1.07803e-59
LEPREL1	ENSG00000090530.5	protein_coding	782.571	-1.65519	0.100145	-16.5279	2.31067e-61	1.25081e-59
TSPAN3	ENSG00000140391.10	protein_coding	2351.09	-0.90482	0.054939	-16.4695	6.07374e-61	3.27675e-59
USP34	ENSG00000115464.10	protein_coding	1793.71	0.987412	0.0600371	16.4467	8.85616e-61	4.76182e-59
GALNT2	ENSG00000143641.8	protein_coding	1098.76	1.26757	0.0771316	16.4339	1.09407e-60	5.86297e-59
TMEM131	ENSG00000075568.12	protein_coding	1629.05	1.03689	0.0631682	16.4148	1.49892e-60	8.00572e-59
ID1	ENSG00000125968.7	protein_coding	219.987	3.38119	0.206408	16.3811	2.60936e-60	1.38903e-58
PRICKLE2	ENSG00000163637.7	protein_coding	198.749	3.45712	0.212059	16.3026	9.46147e-60	5.01991e-58
ATRX	ENSG00000085224.16	protein_coding	1071.94	1.25971	0.077331	16.2898	1.16649e-59	6.16853e-58
PARP4	ENSG00000102699.5	protein_coding	1892.11	0.957835	0.0588077	16.2876	1.20902e-59	6.37239e-58
SLC39A14	ENSG00000104635.9	protein_coding	1314.61	-1.24697	0.076746	-16.2481	2.30479e-59	1.21081e-57
ANXA6	ENSG00000197043.9	protein_coding	3259.27	0.734002	0.0451972	16.24	2.62983e-59	1.37705e-57
HSP90B1	ENSG00000166598.8	protein_coding	18673.3	-0.357164	0.0220868	-16.1709	8.08547e-59	4.21998e-57
RPL9P9	ENSG00000237550.4	pseudogene	264.216	-6.21542	0.385766	-16.1119	2.10562e-58	1.0954e-56
SBNO1	ENSG00000139697.7	protein_coding	1508.65	1.074	0.0667406	16.0922	2.89342e-58	1.50037e-56
MT-ATP6	ENSG00000198899.2	protein_coding	48827.3	0.292335	0.0181923	16.0692	4.19367e-58	2.16758e-56
STX3	ENSG00000166900.10	protein_coding	1148	-1.25567	0.0784361	-16.0089	1.10764e-57	5.70667e-56
ITPK1	ENSG00000100605.12	protein_coding	1328.15	-1.16109	0.0726122	-15.9903	1.49214e-57	7.66301e-56
HSD17B4	ENSG00000133835.10	protein_coding	1429.7	1.07902	0.0676293	15.9549	2.63454e-57	1.34867e-55
AUP1	ENSG00000115307.12	protein_coding	1504.91	-1.17399	0.0736201	-15.9466	3.00869e-57	1.5353e-55
PPIF	ENSG00000108179.9	protein_coding	995.819	-1.37362	0.0862223	-15.9311	3.85369e-57	1.96025e-55
CD99L2	ENSG00000102181.15	protein_coding	2778.59	0.777443	0.0488166	15.9258	4.19692e-57	2.12808e-55
VAC14	ENSG00000103043.10	protein_coding	1462.66	-1.09937	0.0690621	-15.9185	4.71551e-57	2.38349e-55
G0S2	ENSG00000123689.5	protein_coding	1768.45	0.961449	0.0603995	15.9182	4.74072e-57	2.3887e-55
EEF2	ENSG00000167658.11	protein_coding	16043.4	-0.380087	0.0239817	-15.849	1.42748e-56	7.17009e-55
CDK4	ENSG00000135446.12	protein_coding	1130.7	-1.27929	0.08075	-15.8425	1.58286e-56	7.92569e-55
UBR2	ENSG00000024048.6	protein_coding	1302.75	1.11062	0.0701594	15.83	1.93307e-56	9.64909e-55
GYS1	ENSG00000104812.10	protein_coding	969.993	1.43864	0.0909069	15.8255	2.07651e-56	1.03329e-54
MT-CO1	ENSG00000198804.2	protein_coding	196343	0.270848	0.0171529	15.7902	3.63234e-56	1.80189e-54
MAP4	ENSG00000047849.17	protein_coding	5811.33	0.545142	0.0345612	15.7733	4.75374e-56	2.3509e-54
AMOTL2	ENSG00000114019.10	protein_coding	727.188	-1.68921	0.107205	-15.7568	6.16966e-56	3.04174e-54
MAF1	ENSG00000179632.5	protein_coding	3378.47	-0.719892	0.0456906	-15.7558	6.26852e-56	3.081e-54
SLC16A3	ENSG00000141526.10	protein_coding	3679.01	0.71351	0.0453191	15.7441	7.53416e-56	3.69174e-54
ETS1	ENSG00000134954.10	protein_coding	2109.28	-0.946924	0.0601663	-15.7384	8.24394e-56	4.02721e-54
ZBED6	ENSG00000257315.1	protein_coding	226.646	2.94925	0.188085	15.6804	2.05842e-55	1.00249e-53
LONP1	ENSG00000196365.7	protein_coding	1627.85	-1.1181	0.0713916	-15.6615	2.77102e-55	1.34546e-53
AP2B1	ENSG00000006125.12	protein_coding	5896.13	0.554512	0.0354993	15.6204	5.29004e-55	2.56079e-53
GPRC5B	ENSG00000167191.7	protein_coding	283.126	-2.91346	0.187603	-15.5299	2.1766e-54	1.05047e-52
2009-09-01	ENSG00000184640.13	protein_coding	3134.13	0.717547	0.0462872	15.5021	3.3597e-54	1.61659e-52
CDKN1A	ENSG00000124762.9	protein_coding	1293.2	1.12583	0.0728119	15.4621	6.25306e-54	2.99979e-52
RPS23	ENSG00000186468.8	protein_coding	7687.84	-0.492105	0.0321377	-15.3124	6.31885e-53	3.0223e-51
PHGDH	ENSG00000092621.7	protein_coding	688.006	-1.66507	0.108822	-15.3008	7.54938e-53	3.60011e-51
SAMD12	ENSG00000177570.9	protein_coding	718.662	-1.5552	0.101775	-15.2808	1.02662e-52	4.88116e-51
USP9X	ENSG00000124486.8	protein_coding	2985.68	0.710378	0.0465353	15.2654	1.30079e-52	6.16641e-51
YEATS2	ENSG00000163872.11	protein_coding	687.154	1.48255	0.0972281	15.2482	1.69334e-52	8.00366e-51
IRAK1	ENSG00000184216.7	protein_coding	2524.86	-0.800105	0.0524776	-15.2466	1.73411e-52	8.17226e-51
HLA-E	ENSG00000204592.5	protein_coding	4731.8	-0.594891	0.039071	-15.2259	2.38121e-52	1.11889e-50
DEK	ENSG00000124795.10	protein_coding	4029.95	-0.65793	0.0432826	-15.2008	3.49334e-52	1.63666e-50
RNF213	ENSG00000173821.15	protein_coding	1300.49	1.08957	0.0716854	15.1994	3.57032e-52	1.66785e-50
RASD1	ENSG00000108551.4	protein_coding	888.722	1.30402	0.0859045	15.1798	4.80928e-52	2.24009e-50
FEN1	ENSG00000168496.3	protein_coding	725.262	-1.52597	0.100642	-15.1624	6.27389e-52	2.91381e-50
IQSEC2	ENSG00000124313.8	protein_coding	632.568	1.55039	0.102328	15.1512	7.44041e-52	3.4456e-50
CAT	ENSG00000121691.4	protein_coding	913.007	1.30595	0.0863071	15.1314	1.00459e-51	4.63876e-50
ALDH1B1	ENSG00000137124.6	protein_coding	705.014	-1.56095	0.103267	-15.1157	1.27668e-51	5.87825e-50
AC120194.1	ENSG00000213002.1	protein_coding	251.564	-3.16264	0.20941	-15.1026	1.55614e-51	7.14444e-50
CFP	ENSG00000126759.8	protein_coding	225.277	2.73508	0.181164	15.0973	1.68687e-51	7.7225e-50
TAOK1	ENSG00000160551.5	protein_coding	1153.44	1.15596	0.0767381	15.0638	2.80384e-51	1.27994e-49
SVIL	ENSG00000197321.10	protein_coding	1197.81	1.10393	0.0733729	15.0454	3.69949e-51	1.684e-49
RPL31	ENSG00000071082.6	protein_coding	5338.4	-0.544673	0.0362156	-15.0397	4.03248e-51	1.83038e-49
TLN1	ENSG00000137076.14	protein_coding	6342.99	0.495185	0.0329349	15.0353	4.31242e-51	1.95192e-49
SLC7A11	ENSG00000151012.9	protein_coding	1091.08	-1.21914	0.0811321	-15.0266	4.91566e-51	2.21869e-49
PLIN2	ENSG00000147872.5	protein_coding	2380.98	0.796357	0.0530809	15.0027	7.05016e-51	3.17317e-49
ITGA10	ENSG00000143127.8	protein_coding	300.609	2.3325	0.155712	14.9796	9.98174e-51	4.48004e-49
FSTL1	ENSG00000163430.5	protein_coding	1587.37	-1.04076	0.0695659	-14.9608	1.32507e-50	5.93064e-49
SPATS2L	ENSG00000196141.8	protein_coding	1687.93	1.04678	0.0700969	14.9333	2.00076e-50	8.92987e-49
CDC6	ENSG00000094804.5	protein_coding	698.274	-1.52875	0.102414	-14.9272	2.19387e-50	9.76454e-49
TNFRSF1A	ENSG00000067182.3	protein_coding	1962.32	0.864187	0.0580438	14.8885	3.91254e-50	1.73658e-48
TTC3	ENSG00000182670.9	protein_coding	2395.75	0.818569	0.0550276	14.8756	4.74628e-50	2.10082e-48
MAGED1	ENSG00000179222.13	protein_coding	1277.51	1.06901	0.0720831	14.8302	9.34259e-50	4.12387e-48
DUSP1	ENSG00000120129.5	protein_coding	1186.19	1.19635	0.0807614	14.8134	1.19929e-49	5.27918e-48
CMKLR1	ENSG00000174600.9	protein_coding	139.172	3.95862	0.267569	14.7947	1.58403e-49	6.95368e-48
UBALD2	ENSG00000185262.7	protein_coding	1011.23	1.20483	0.0814804	14.7868	1.78207e-49	7.80169e-48
LAYN	ENSG00000204381.7	protein_coding	631.259	-1.64131	0.111038	-14.7816	1.92539e-49	8.40613e-48
FAM211A	ENSG00000181350.7	protein_coding	1564.74	-1.00217	0.0678934	-14.7609	2.61592e-49	1.13899e-47
CLCN7	ENSG00000103249.13	protein_coding	753.861	-1.47259	0.0998055	-14.7546	2.87542e-49	1.24859e-47
TNIK	ENSG00000154310.12	protein_coding	187.753	3.11258	0.210977	14.7531	2.93736e-49	1.27203e-47
LAMA3	ENSG00000053747.11	protein_coding	684.353	1.45387	0.0990372	14.68	8.65528e-49	3.7381e-47
RP11-138I1.4	ENSG00000265401.1	antisense	5128.5	-0.551412	0.0376231	-14.6562	1.22941e-48	5.29538e-47
ZBTB38	ENSG00000177311.6	protein_coding	905.416	1.21881	0.0832583	14.6389	1.5851e-48	6.80914e-47
TMBIM6	ENSG00000139644.8	protein_coding	5703.05	-0.510279	0.034906	-14.6187	2.13575e-48	9.15002e-47
RFTN1	ENSG00000131378.9	protein_coding	890.789	-1.34753	0.0921965	-14.6158	2.22624e-48	9.51228e-47
ZHX3	ENSG00000174306.17	protein_coding	945.815	1.23914	0.0847957	14.6132	2.31349e-48	9.85878e-47
CTNND1	ENSG00000198561.8	protein_coding	2055.28	0.859584	0.058849	14.6066	2.54913e-48	1.08341e-46
ARHGEF28	ENSG00000214944.5	protein_coding	1803.4	-0.913255	0.0625867	-14.5918	3.1659e-48	1.34199e-46
NDC1	ENSG00000058804.10	protein_coding	635.69	-1.61042	0.110467	-14.5783	3.86291e-48	1.63313e-46
ARHGAP5	ENSG00000100852.8	protein_coding	2698.52	0.720824	0.0494681	14.5715	4.2639e-48	1.79791e-46
LGALS1	ENSG00000100097.7	protein_coding	2952.66	0.703678	0.0482925	14.5712	4.28546e-48	1.80226e-46
FUS	ENSG00000089280.14	protein_coding	3088.89	-0.684318	0.0469861	-14.5643	4.73929e-48	1.9879e-46
SIPA1L1	ENSG00000197555.5	protein_coding	1162.8	1.07601	0.0740303	14.5348	7.29532e-48	3.05203e-46
TBC1D8	ENSG00000204634.8	protein_coding	605.256	1.48824	0.102473	14.5233	8.62672e-48	3.59963e-46
PTMA	ENSG00000187514.10	protein_coding	9894.24	-0.444902	0.0306354	-14.5225	8.73072e-48	3.63357e-46
KLF6	ENSG00000067082.10	protein_coding	2475.79	0.73792	0.0508385	14.515	9.73897e-48	4.04268e-46
ZCCHC6	ENSG00000083223.13	protein_coding	637.425	1.4499	0.0999496	14.5063	1.1057e-47	4.57792e-46
RP11-498C9.3	ENSG00000262413.1	antisense	2080.37	-0.850897	0.0586839	-14.4997	1.21738e-47	5.02736e-46
SLC25A5	ENSG00000005022.5	protein_coding	3618.33	-0.626062	0.0432415	-14.4783	1.66216e-47	6.84648e-46
CNBP	ENSG00000169714.12	protein_coding	3022.3	-0.693081	0.0478978	-14.47	1.87437e-47	7.7008e-46
PKN1	ENSG00000123143.8	protein_coding	4045.67	-0.673554	0.0465508	-14.4692	1.89616e-47	7.77036e-46
FASN	ENSG00000169710.6	protein_coding	10113.9	0.392315	0.0271438	14.4532	2.39319e-47	9.78216e-46
CKS1B	ENSG00000173207.8	protein_coding	668.686	-1.49881	0.103906	-14.4248	3.61411e-47	1.47351e-45
ARRDC3	ENSG00000113369.4	protein_coding	547.345	1.66729	0.115643	14.4175	4.01499e-47	1.63279e-45
HSPA9	ENSG00000113013.8	protein_coding	5564.91	-0.534379	0.037084	-14.41	4.47922e-47	1.81698e-45
DAAM2	ENSG00000146122.12	protein_coding	576.937	1.56285	0.108658	14.3831	6.60386e-47	2.67206e-45
PSG5	ENSG00000204941.9	protein_coding	184.195	-3.91863	0.272827	-14.3631	8.82295e-47	3.56096e-45
EGLN3	ENSG00000129521.9	protein_coding	278.156	2.26272	0.157657	14.3522	1.03194e-46	4.15448e-45
BBX	ENSG00000114439.14	protein_coding	1488.7	0.944152	0.0657864	14.3518	1.03821e-46	4.16924e-45
RP11-342D11.2	ENSG00000238258.1	antisense	484.703	1.64864	0.115006	14.3353	1.31734e-46	5.27693e-45
HMGN3	ENSG00000118418.10	protein_coding	500.239	1.61719	0.112864	14.3287	1.4477e-46	5.78467e-45
ADAM9	ENSG00000168615.7	protein_coding	2470.65	0.738414	0.0515395	14.3271	1.48075e-46	5.90202e-45
TANC2	ENSG00000170921.10	protein_coding	1000.12	1.17622	0.0821456	14.3187	1.67223e-46	6.64865e-45
PHF3	ENSG00000118482.7	protein_coding	2167.95	0.83048	0.0580652	14.3026	2.10924e-46	8.36542e-45
UBB	ENSG00000170315.9	protein_coding	7651.85	-0.465074	0.0325688	-14.2797	2.92717e-46	1.15807e-44
APOBEC3C	ENSG00000244509.3	protein_coding	431.546	1.76751	0.123828	14.2739	3.18157e-46	1.25562e-44
RBM25	ENSG00000119707.9	protein_coding	2187.52	0.778207	0.054541	14.2683	3.44924e-46	1.35792e-44
TMEM97	ENSG00000109084.9	protein_coding	833.711	-1.34145	0.0940786	-14.2588	3.95049e-46	1.55144e-44
EIF5A	ENSG00000132507.13	protein_coding	4313.15	-0.585837	0.0410931	-14.2563	4.09408e-46	1.6039e-44
C4orf3	ENSG00000164096.10	protein_coding	1634.85	0.900969	0.0632029	14.2552	4.16202e-46	1.62654e-44
EIF4EBP1	ENSG00000187840.4	protein_coding	1371.57	-1.04522	0.0733525	-14.2493	4.52832e-46	1.76538e-44
CNN3	ENSG00000117519.11	protein_coding	3708.78	0.593911	0.0418009	14.2081	8.16117e-46	3.17394e-44
DNASE2	ENSG00000105612.4	protein_coding	1462.44	-0.989434	0.0696527	-14.2052	8.50049e-46	3.2979e-44
RELN	ENSG00000189056.9	protein_coding	172.327	-4.30594	0.303369	-14.1937	1.00191e-45	3.87769e-44
RAI14	ENSG00000039560.9	protein_coding	2219.45	0.76653	0.0540406	14.1843	1.14554e-45	4.42287e-44
KMT2A	ENSG00000118058.16	protein_coding	1028.2	1.17429	0.0829585	14.1551	1.73644e-45	6.6882e-44
CNNM2	ENSG00000148842.13	protein_coding	1264.04	-1.10379	0.0779928	-14.1524	1.80427e-45	6.93283e-44
TBC1D16	ENSG00000167291.11	protein_coding	681.654	1.44376	0.102196	14.1274	2.57389e-45	9.86638e-44
CD63	ENSG00000135404.7	protein_coding	5374.31	-0.514529	0.0364454	-14.1178	2.94982e-45	1.12804e-43
RPS16	ENSG00000105193.4	protein_coding	4459.03	-0.563898	0.0400567	-14.0775	5.22434e-45	1.99309e-43
EHF	ENSG00000135373.8	protein_coding	523.185	1.57231	0.111716	14.0741	5.47933e-45	2.0854e-43
TRIP12	ENSG00000153827.9	protein_coding	1945.89	0.813236	0.0577876	14.0728	5.57841e-45	2.11808e-43
ARNT2	ENSG00000172379.14	protein_coding	361.165	-2.121	0.150761	-14.0686	5.92081e-45	2.24277e-43
ESAM	ENSG00000149564.7	protein_coding	1042.71	-1.17302	0.0834686	-14.0534	7.34432e-45	2.77543e-43
SNAI2	ENSG00000019549.4	protein_coding	1033.91	1.09246	0.0778428	14.0342	9.62776e-45	3.62978e-43
CXCR4	ENSG00000121966.6	protein_coding	594.833	-1.55574	0.110862	-14.0331	9.77521e-45	3.67672e-43
BIN1	ENSG00000136717.10	protein_coding	518.78	1.62805	0.116055	14.0282	1.04778e-44	3.93177e-43
RPS19	ENSG00000105372.2	protein_coding	5126.71	-0.525884	0.0375244	-14.0145	1.27141e-44	4.75976e-43
CDH4	ENSG00000179242.11	protein_coding	736.055	-1.39521	0.0995877	-14.0098	1.35724e-44	5.06923e-43
CAPNS1	ENSG00000126247.6	protein_coding	6693.49	0.465264	0.0332259	14.003	1.49375e-44	5.56614e-43
CLPTM1L	ENSG00000049656.9	protein_coding	1782.58	-0.925777	0.0662816	-13.9673	2.46699e-44	9.17136e-43
NFKBIA	ENSG00000100906.6	protein_coding	1569.33	0.909334	0.0651741	13.9524	3.04253e-44	1.12848e-42
VCL	ENSG00000035403.12	protein_coding	3533.39	0.615025	0.0441181	13.9404	3.5972e-44	1.33113e-42
GPS2	ENSG00000132522.11	protein_coding	1502.46	-0.949533	0.0681462	-13.9338	3.94969e-44	1.4582e-42
IER5	ENSG00000162783.8	protein_coding	1011.97	-1.19748	0.0861351	-13.9023	6.13225e-44	2.25878e-42
MMP1	ENSG00000196611.4	protein_coding	888.855	-1.26366	0.090911	-13.9	6.33596e-44	2.32846e-42
UGCG	ENSG00000148154.5	protein_coding	925.936	-1.20165	0.0864836	-13.8945	6.83638e-44	2.50662e-42
METTL9	ENSG00000197006.9	protein_coding	1240.77	1.0724	0.0772185	13.8878	7.50934e-44	2.74708e-42
TRAM1	ENSG00000067167.3	protein_coding	1858.73	-0.856772	0.0617632	-13.8719	9.37916e-44	3.42329e-42
ACTR2	ENSG00000138071.9	protein_coding	3405.46	0.621607	0.0448434	13.8617	1.08074e-43	3.93561e-42
HDAC9	ENSG00000048052.17	protein_coding	456.469	-1.81504	0.131229	-13.8311	1.6547e-43	6.01209e-42
GAS6	ENSG00000183087.10	protein_coding	1959.74	-0.854427	0.0618115	-13.8231	1.84934e-43	6.70407e-42
CYBRD1	ENSG00000071967.7	protein_coding	1340.57	-1.01594	0.0735171	-13.8192	1.95354e-43	7.06581e-42
HNRNPAB	ENSG00000197451.6	protein_coding	1951.07	-0.832205	0.0602234	-13.8186	1.96789e-43	7.10169e-42
BAG3	ENSG00000151929.5	protein_coding	2207.51	0.778013	0.056304	13.8181	1.98347e-43	7.14184e-42
CMIP	ENSG00000153815.12	protein_coding	1469.38	-0.936963	0.0678684	-13.8056	2.35823e-43	8.47218e-42
SH2B3	ENSG00000111252.6	protein_coding	2179.38	0.780745	0.0565784	13.7993	2.57172e-43	9.21849e-42
NIPBL	ENSG00000164190.12	protein_coding	930.277	1.13892	0.0826878	13.7738	3.66459e-43	1.31066e-41
SLC52A2	ENSG00000185803.4	protein_coding	949.59	-1.19675	0.0870262	-13.7516	4.97831e-43	1.77656e-41
C4BPB	ENSG00000123843.8	protein_coding	445.059	-1.82696	0.132934	-13.7433	5.58319e-43	1.98799e-41
BRI3	ENSG00000164713.5	protein_coding	1015.15	-1.13047	0.0823992	-13.7195	7.7652e-43	2.7588e-41
DDX17	ENSG00000100201.14	protein_coding	1318.04	0.948762	0.0691665	13.7171	8.02388e-43	2.8444e-41
TOP2B	ENSG00000077097.9	protein_coding	1721	0.835897	0.0609947	13.7044	9.55289e-43	3.37894e-41
CHST15	ENSG00000182022.13	protein_coding	866.841	1.16937	0.0854842	13.6793	1.34949e-42	4.76274e-41
DNAJC6	ENSG00000116675.11	protein_coding	394.536	-1.93086	0.141153	-13.6791	1.35268e-42	4.7635e-41
MAP2K3	ENSG00000034152.14	protein_coding	688.804	-1.38498	0.101261	-13.6773	1.38719e-42	4.87433e-41
ECI2	ENSG00000198721.8	protein_coding	1211.47	1.0028	0.0733557	13.6704	1.52595e-42	5.35017e-41
TCN2	ENSG00000185339.4	protein_coding	208.859	2.81654	0.206141	13.6631	1.68562e-42	5.89708e-41
WDR60	ENSG00000126870.11	protein_coding	598.696	1.46841	0.107495	13.6603	1.75299e-42	6.11942e-41
SEC61A1	ENSG00000058262.5	protein_coding	3916.8	-0.572995	0.0420139	-13.6382	2.37253e-42	8.26413e-41
SRRM2	ENSG00000167978.12	protein_coding	4943.93	0.509612	0.0374027	13.625	2.84351e-42	9.88319e-41
PINK1-AS	ENSG00000117242.7	antisense	1185.65	-1.04158	0.076537	-13.6088	3.5496e-42	1.23107e-40
PKIG	ENSG00000168734.9	protein_coding	453.56	-1.75237	0.128808	-13.6045	3.76413e-42	1.30265e-40
BCAP31	ENSG00000185825.11	protein_coding	3194.96	-0.627328	0.0461173	-13.6029	3.85046e-42	1.32965e-40
IFNGR2	ENSG00000159128.10	protein_coding	1039.74	1.0566	0.0777836	13.5839	4.99287e-42	1.72045e-40
TFPI	ENSG00000003436.10	protein_coding	1419.71	1.01125	0.0744476	13.5834	5.02213e-42	1.72682e-40
POLR2A	ENSG00000181222.10	protein_coding	2538.93	0.807786	0.059496	13.5772	5.47117e-42	1.87719e-40
MCM2	ENSG00000073111.9	protein_coding	485.05	-1.66597	0.12317	-13.5258	1.10175e-41	3.77208e-40
ACSL4	ENSG00000068366.15	protein_coding	3151.11	0.626424	0.0463364	13.519	1.20725e-41	4.12446e-40
YWHAE	ENSG00000108953.12	protein_coding	7825.58	0.403513	0.0298791	13.5049	1.46392e-41	4.99074e-40
TRIB3	ENSG00000101255.6	protein_coding	1393.19	-1.05013	0.0778619	-13.4871	1.86298e-41	6.3377e-40
HIVEP2	ENSG00000010818.4	protein_coding	814.812	1.21082	0.0897981	13.4839	1.9464e-41	6.60747e-40
CAPRIN1	ENSG00000135387.15	protein_coding	3421.87	0.675421	0.0501176	13.4767	2.14465e-41	7.26506e-40
B3GNT5	ENSG00000176597.7	protein_coding	417.649	1.76831	0.131283	13.4694	2.36669e-41	8.00033e-40
FLII	ENSG00000177731.11	protein_coding	4315.49	-0.554746	0.0411962	-13.4659	2.4814e-41	8.37042e-40
RPSA	ENSG00000168028.9	protein_coding	5405.85	-0.479653	0.0356205	-13.4656	2.49124e-41	8.38595e-40
ACACA	ENSG00000132142.15	protein_coding	1481.29	0.882473	0.0656078	13.4507	3.04873e-41	1.02411e-39
E2F7	ENSG00000165891.11	protein_coding	1244.25	-0.997521	0.0742101	-13.4419	3.4373e-41	1.15221e-39
PRKCA	ENSG00000154229.7	protein_coding	1467.4	0.884719	0.0658708	13.4311	3.97326e-41	1.32909e-39
E2F1	ENSG00000101412.9	protein_coding	296.859	-2.22566	0.16592	-13.4141	5.00302e-41	1.67007e-39
TCF19	ENSG00000137310.7	protein_coding	511.966	-1.59682	0.119106	-13.4067	5.52224e-41	1.83956e-39
ABL2	ENSG00000143322.15	protein_coding	1862.31	-0.822602	0.0613738	-13.4031	5.79583e-41	1.92669e-39
ATG10	ENSG00000152348.11	protein_coding	4063.4	-0.552652	0.0412464	-13.3988	6.14467e-41	2.03843e-39
PPFIBP1	ENSG00000110841.9	protein_coding	843.847	1.17591	0.0877668	13.3981	6.20303e-41	2.05354e-39
HSPA5	ENSG00000044574.7	protein_coding	16115.8	-0.3132	0.0233895	-13.3906	6.86443e-41	2.26781e-39
RRAGC	ENSG00000116954.7	protein_coding	1039.81	-1.0929	0.0816962	-13.3776	8.17586e-41	2.69551e-39
SYNGR2	ENSG00000108639.3	protein_coding	1457.47	-0.946299	0.0707773	-13.3701	9.04311e-41	2.97531e-39
LAMC1	ENSG00000135862.5	protein_coding	3555.7	0.60048	0.0450118	13.3405	1.34566e-40	4.41835e-39
TRIB2	ENSG00000071575.7	protein_coding	749.79	1.22587	0.0921492	13.3031	2.22151e-40	7.2792e-39
CEBPB	ENSG00000172216.4	protein_coding	1427.24	0.885325	0.0666166	13.2899	2.65094e-40	8.66856e-39
PYGB	ENSG00000100994.7	protein_coding	4964.11	0.497727	0.0374784	13.2803	3.00986e-40	9.82218e-39
PHC2	ENSG00000134686.12	protein_coding	2855.83	0.642611	0.048477	13.256	4.16485e-40	1.35637e-38
DMBT1	ENSG00000187908.11	protein_coding	116.57	3.71477	0.280329	13.2514	4.42682e-40	1.43876e-38
GAS5	ENSG00000234741.3	processed_transcript	1619.12	-0.854384	0.0645188	-13.2424	4.9926e-40	1.61936e-38
SARS	ENSG00000031698.8	protein_coding	4173.89	-0.544741	0.0411669	-13.2325	5.69754e-40	1.84428e-38
ATF7IP	ENSG00000171681.8	protein_coding	641.958	1.34188	0.101444	13.2279	6.05893e-40	1.9573e-38
ARHGEF2	ENSG00000116584.13	protein_coding	1872.87	0.795546	0.0601957	13.216	7.09375e-40	2.28698e-38
GFPT2	ENSG00000131459.8	protein_coding	439.132	1.59015	0.120377	13.2098	7.70521e-40	2.47913e-38
TNFRSF10D	ENSG00000173530.5	protein_coding	1014.53	1.10051	0.0833487	13.2037	8.34775e-40	2.68048e-38
USO1	ENSG00000138768.10	protein_coding	1690.38	0.807926	0.0612672	13.1869	1.0437e-39	3.34465e-38
CALU	ENSG00000128595.12	protein_coding	5480.48	-0.477522	0.0362217	-13.1833	1.09462e-39	3.50083e-38
ACLY	ENSG00000131473.12	protein_coding	7477.62	0.406786	0.0309019	13.1638	1.41808e-39	4.52627e-38
PLK2	ENSG00000145632.10	protein_coding	920.829	-1.16627	0.0886259	-13.1594	1.50228e-39	4.78549e-38
ASH1L	ENSG00000116539.6	protein_coding	854.461	1.19995	0.0912141	13.1553	1.58569e-39	5.04118e-38
RASA1	ENSG00000145715.10	protein_coding	691.295	1.25743	0.0956041	13.1525	1.64718e-39	5.2263e-38
GNAI2	ENSG00000114353.12	protein_coding	3277.62	0.591626	0.0449859	13.1514	1.67137e-39	5.29255e-38
FRYL	ENSG00000075539.9	protein_coding	620.263	1.31407	0.100047	13.1346	2.08664e-39	6.59454e-38
C1orf43	ENSG00000143612.14	protein_coding	2607.31	-0.686416	0.0522692	-13.1323	2.14975e-39	6.78059e-38
ITGA3	ENSG00000005884.13	protein_coding	15975.7	-0.334145	0.0255029	-13.1022	3.19743e-39	1.00653e-37
EIF4H	ENSG00000106682.10	protein_coding	4022.8	-0.546765	0.0417579	-13.0937	3.57739e-39	1.12393e-37
EGFR	ENSG00000146648.11	protein_coding	3686.54	-0.583728	0.0445894	-13.0912	3.69825e-39	1.15963e-37
GALNT10	ENSG00000164574.11	protein_coding	1698.77	0.80006	0.0612081	13.0712	4.81307e-39	1.50625e-37
RAB32	ENSG00000118508.4	protein_coding	503.272	-1.62227	0.124329	-13.0482	6.5075e-39	2.03255e-37
PHF21A	ENSG00000135365.11	protein_coding	466.865	1.53335	0.117532	13.0463	6.66905e-39	2.07895e-37
HLA-A	ENSG00000206503.7	protein_coding	4408.04	-0.514323	0.0394601	-13.034	7.83833e-39	2.43871e-37
PLEKHB2	ENSG00000115762.12	protein_coding	1531.71	-0.896084	0.0687744	-13.0293	8.33434e-39	2.58801e-37
RAN	ENSG00000132341.7	protein_coding	3881.36	-0.563809	0.0432911	-13.0237	8.97441e-39	2.78137e-37
FHL2	ENSG00000115641.14	protein_coding	592.621	-1.42678	0.109561	-13.0227	9.09082e-39	2.81201e-37
CTSC	ENSG00000109861.11	protein_coding	1777.69	-0.806282	0.0619534	-13.0143	1.01437e-38	3.13165e-37
CA12	ENSG00000074410.9	protein_coding	310.444	1.88889	0.145212	13.0079	1.10372e-38	3.40095e-37
SYDE1	ENSG00000105137.8	protein_coding	1061.41	-1.08746	0.0836038	-13.0073	1.11217e-38	3.4204e-37
ATP6V0D2	ENSG00000147614.3	protein_coding	279.063	-2.21959	0.170677	-13.0046	1.15169e-38	3.53517e-37
ARF4	ENSG00000168374.6	protein_coding	2490.07	-0.723885	0.0556713	-13.0028	1.17886e-38	3.61163e-37
RPS18	ENSG00000231500.2	protein_coding	16472.8	-0.299915	0.0230683	-13.0012	1.20489e-38	3.68434e-37
LPIN2	ENSG00000101577.5	protein_coding	1571.57	0.837596	0.0644363	12.9988	1.24248e-38	3.79204e-37
KLF9	ENSG00000119138.3	protein_coding	531.993	1.49176	0.114805	12.9939	1.32521e-38	4.03684e-37
MYH9	ENSG00000100345.16	protein_coding	13329.5	0.32231	0.0248921	12.9483	2.40312e-38	7.30649e-37
LITAF	ENSG00000189067.8	protein_coding	889.807	-1.14556	0.08854	-12.9383	2.73545e-38	8.30115e-37
EPHA2	ENSG00000142627.9	protein_coding	3660.37	-0.615209	0.0475844	-12.9288	3.096e-38	9.37754e-37
AGR2	ENSG00000106541.7	protein_coding	624.743	1.3064	0.101076	12.925	3.25445e-38	9.83888e-37
CTSL	ENSG00000135047.10	protein_coding	2174.47	0.747778	0.057888	12.9177	3.57848e-38	1.07981e-36
AC010761.8	ENSG00000264577.1	antisense	3613.42	-0.56514	0.0437595	-12.9147	3.71931e-38	1.1202e-36
RPL13A	ENSG00000142541.12	protein_coding	15780.5	-0.309151	0.0239486	-12.9089	4.00836e-38	1.20499e-36
ITGB2	ENSG00000160255.12	protein_coding	627.265	-1.35434	0.105004	-12.898	4.61999e-38	1.38626e-36
SH3BGRL3	ENSG00000142669.9	protein_coding	5272.43	0.497089	0.0385504	12.8945	4.83206e-38	1.44718e-36
CRYBG3	ENSG00000233280.2	protein_coding	120.987	3.44787	0.267567	12.886	5.39698e-38	1.61335e-36
UTRN	ENSG00000152818.14	protein_coding	939.954	1.0467	0.0813231	12.8708	6.56868e-38	1.95996e-36
NR3C2	ENSG00000151623.10	protein_coding	312.639	-2.12626	0.165469	-12.8499	8.61208e-38	2.56489e-36
TRIM28	ENSG00000130726.7	protein_coding	2625.75	-0.70602	0.0550325	-12.8291	1.12607e-37	3.34751e-36
RPS14	ENSG00000164587.7	protein_coding	2570.8	-0.667253	0.0520248	-12.8257	1.17775e-37	3.49464e-36
RAB3D	ENSG00000105514.3	protein_coding	148.587	2.91748	0.227486	12.8248	1.19022e-37	3.52511e-36
SCCPDH	ENSG00000143653.9	protein_coding	1113.38	-1.03133	0.0805154	-12.8091	1.4583e-37	4.31115e-36
RPLP1	ENSG00000137818.7	protein_coding	5221.87	-0.47164	0.0368244	-12.8078	1.48269e-37	4.37515e-36
ITGA2	ENSG00000164171.6	protein_coding	3343.68	0.626936	0.0489546	12.8065	1.50847e-37	4.44306e-36
PLOD1	ENSG00000083444.12	protein_coding	2404.77	0.686989	0.053694	12.7945	1.7595e-37	5.17293e-36
HEXB	ENSG00000049860.9	protein_coding	1482.9	-0.870936	0.068097	-12.7896	1.87361e-37	5.49833e-36
PDIA6	ENSG00000143870.8	protein_coding	4371.18	-0.524156	0.0410187	-12.7785	2.16301e-37	6.33599e-36
ASAP2	ENSG00000151693.5	protein_coding	1209.1	0.928706	0.0727055	12.7735	2.30463e-37	6.73852e-36
LUZP1	ENSG00000169641.9	protein_coding	1018.77	1.07579	0.0843833	12.7489	3.16371e-37	9.23355e-36
MYCBP2	ENSG00000005810.13	protein_coding	824.093	1.13005	0.0886702	12.7445	3.34689e-37	9.7504e-36
SAE1	ENSG00000142230.7	protein_coding	1923.91	-0.765852	0.0601849	-12.725	4.29597e-37	1.24926e-35
LASP1	ENSG00000002834.13	protein_coding	6591.16	0.423961	0.0333314	12.7196	4.60395e-37	1.3364e-35
HELZ	ENSG00000198265.7	protein_coding	527.788	1.38176	0.108882	12.6904	6.68591e-37	1.93722e-35
BCAR3	ENSG00000137936.12	protein_coding	1775.04	0.784625	0.0618448	12.687	6.98078e-37	2.01901e-35
RP11-149I23.3	ENSG00000232110.3	antisense	140.166	-3.80122	0.299789	-12.6797	7.66592e-37	2.21317e-35
ZNF462	ENSG00000148143.8	protein_coding	292.633	1.8946	0.149426	12.6792	7.70864e-37	2.2215e-35
CSDE1	ENSG00000009307.11	protein_coding	7665.93	0.390256	0.0308342	12.6566	1.02884e-36	2.95961e-35
SLC4A2	ENSG00000164889.8	protein_coding	1138.78	-1.00026	0.0790432	-12.6546	1.05478e-36	3.02881e-35
IPO5	ENSG00000065150.14	protein_coding	2575	-0.669484	0.0529159	-12.6518	1.09271e-36	3.13211e-35
PKP2	ENSG00000057294.9	protein_coding	752.692	1.17516	0.0928984	12.65	1.11922e-36	3.20236e-35
EVI2B	ENSG00000185862.5	protein_coding	485.04	-1.59805	0.126384	-12.6444	1.20101e-36	3.43026e-35
SLC20A2	ENSG00000168575.5	protein_coding	411.587	-1.71662	0.135931	-12.6286	1.4685e-36	4.18678e-35
CMTM7	ENSG00000153551.9	protein_coding	988.695	-1.05245	0.0833764	-12.6229	1.57929e-36	4.49466e-35
CHD9	ENSG00000177200.11	protein_coding	354.705	1.85442	0.147083	12.6079	1.90903e-36	5.42347e-35
PCLO	ENSG00000186472.15	protein_coding	210.36	2.28302	0.181109	12.6058	1.96128e-36	5.56205e-35
RPL18A	ENSG00000105640.8	protein_coding	6743.09	-0.417467	0.0331598	-12.5895	2.41058e-36	6.82416e-35
PIAS3	ENSG00000131788.11	protein_coding	762.377	1.25141	0.0994027	12.5893	2.41797e-36	6.83299e-35
GNPDA1	ENSG00000113552.11	protein_coding	834.593	-1.20115	0.0954128	-12.5889	2.42955e-36	6.85363e-35
SERPINH1	ENSG00000149257.9	protein_coding	1815.78	0.769094	0.0611485	12.5775	2.8084e-36	7.90843e-35
SLC7A2	ENSG00000003989.12	protein_coding	413.803	1.58464	0.126018	12.5747	2.90819e-36	8.17508e-35
KIF5B	ENSG00000170759.10	protein_coding	2767.86	0.617236	0.0491412	12.5605	3.48344e-36	9.77498e-35
SERTAD4	ENSG00000082497.7	protein_coding	131.97	-4.15445	0.331013	-12.5507	3.93797e-36	1.10311e-34
PLAU	ENSG00000122861.11	protein_coding	473.04	-1.56649	0.125025	-12.5294	5.15241e-36	1.44079e-34
NEU1	ENSG00000204386.6	protein_coding	1879.5	-0.749919	0.0599122	-12.517	6.02919e-36	1.68303e-34
TMEM109	ENSG00000110108.5	protein_coding	1339.19	-0.974591	0.0778974	-12.5112	6.4825e-36	1.80642e-34
RPS2	ENSG00000140988.11	protein_coding	7402.45	-0.411948	0.0329567	-12.4997	7.49689e-36	2.08546e-34
CPE	ENSG00000109472.9	protein_coding	875.527	1.05612	0.0845234	12.495	7.94828e-36	2.2072e-34
FAM162A	ENSG00000114023.11	protein_coding	491.539	1.40537	0.11251	12.491	8.35943e-36	2.31736e-34
RRAS2	ENSG00000133818.8	protein_coding	964.346	-1.04243	0.0835237	-12.4807	9.51876e-36	2.63418e-34
SLC25A3	ENSG00000075415.8	protein_coding	7045.52	-0.41454	0.0332174	-12.4796	9.65014e-36	2.66593e-34
MYCT1	ENSG00000120279.6	protein_coding	141.463	-3.59591	0.288458	-12.4659	1.14511e-35	3.15802e-34
WWC1	ENSG00000113645.9	protein_coding	348.99	-1.87259	0.150219	-12.4657	1.14799e-35	3.16051e-34
MFN2	ENSG00000116688.12	protein_coding	1617.84	-0.822601	0.0660546	-12.4533	1.3411e-35	3.68583e-34
ZNF114	ENSG00000178150.4	protein_coding	342.946	-1.85887	0.149357	-12.4458	1.4737e-35	4.04335e-34
SRPX2	ENSG00000102359.5	protein_coding	193.853	2.35512	0.189233	12.4456	1.47815e-35	4.04861e-34
EDN1	ENSG00000078401.6	protein_coding	204.805	-2.64074	0.21225	-12.4417	1.55218e-35	4.24414e-34
ATP6V0D1	ENSG00000159720.7	protein_coding	1447.09	-0.877842	0.0705911	-12.4356	1.67516e-35	4.57259e-34
TUBB6	ENSG00000176014.8	protein_coding	2761.34	-0.611693	0.0492341	-12.4242	1.93239e-35	5.26578e-34
TPI1	ENSG00000111669.10	protein_coding	6496.7	0.433519	0.0349057	12.4197	2.04291e-35	5.55747e-34
RPS27A	ENSG00000143947.8	protein_coding	5114.59	-0.509066	0.0410079	-12.4138	2.1983e-35	5.97007e-34
UBE2S	ENSG00000108106.9	protein_coding	673.922	-1.24814	0.100632	-12.4031	2.51559e-35	6.80865e-34
KTN1	ENSG00000126777.13	protein_coding	8340.11	0.393463	0.0317229	12.4031	2.51281e-35	6.80865e-34
MTCH1	ENSG00000137409.14	protein_coding	4891.01	-0.468451	0.0377814	-12.399	2.64692e-35	7.15204e-34
MET	ENSG00000105976.10	protein_coding	1852.05	-0.747655	0.0603261	-12.3936	2.83163e-35	7.63824e-34
NPAS2	ENSG00000170485.12	protein_coding	1465.75	0.815033	0.0659873	12.3514	4.78906e-35	1.28967e-33
TUBA1A	ENSG00000167552.9	protein_coding	1450.82	0.837859	0.0678441	12.3498	4.88452e-35	1.31317e-33
MT-ND3	ENSG00000198840.2	protein_coding	6180.42	0.425083	0.0344241	12.3484	4.96697e-35	1.33309e-33
USP1	ENSG00000162607.8	protein_coding	966.292	-1.12997	0.0916083	-12.3348	5.88108e-35	1.57579e-33
MT-ND4L	ENSG00000212907.2	protein_coding	10042.8	0.35355	0.0286922	12.3222	6.88193e-35	1.84089e-33
RNH1	ENSG00000023191.12	protein_coding	1800.53	-0.793154	0.064608	-12.2764	1.21273e-34	3.23858e-33
TEX264	ENSG00000164081.8	protein_coding	671.905	-1.24679	0.101574	-12.2747	1.23832e-34	3.30143e-33
USF2	ENSG00000105698.11	protein_coding	1959.3	-0.795861	0.0648498	-12.2724	1.27467e-34	3.3927e-33
NAMPTL	ENSG00000229644.4	protein_coding	350.799	1.70623	0.139069	12.2689	1.33012e-34	3.53442e-33
PRKDC	ENSG00000253729.3	protein_coding	2028.86	0.748302	0.0611383	12.2395	1.9121e-34	5.07246e-33
PACSIN2	ENSG00000100266.13	protein_coding	1078.99	0.973119	0.0795454	12.2335	2.05853e-34	5.45187e-33
PTPN12	ENSG00000127947.11	protein_coding	1650.4	0.763943	0.0624535	12.2322	2.09209e-34	5.5316e-33
HMGB2	ENSG00000164104.7	protein_coding	1228.17	-0.912917	0.0746843	-12.2237	2.32314e-34	6.13241e-33
SAA1	ENSG00000173432.6	protein_coding	111.023	3.40667	0.278868	12.2161	2.55164e-34	6.72449e-33
GRINA	ENSG00000178719.12	protein_coding	3433.57	-0.556744	0.0456031	-12.2085	2.80153e-34	7.37091e-33
DTL	ENSG00000143476.13	protein_coding	307.372	-2.05044	0.167974	-12.2069	2.85689e-34	7.50426e-33
DDX6	ENSG00000110367.7	protein_coding	916.469	1.03943	0.085184	12.2022	3.02681e-34	7.93758e-33
PAPSS2	ENSG00000198682.8	protein_coding	853.245	-1.08783	0.0892205	-12.1926	3.40309e-34	8.90977e-33
ATP6V0B	ENSG00000117410.9	protein_coding	640.515	-1.30895	0.107369	-12.1911	3.46551e-34	9.05837e-33
NR2F2	ENSG00000185551.8	protein_coding	1970.76	0.698015	0.0572644	12.1893	3.54323e-34	9.24646e-33
PLAT	ENSG00000104368.13	protein_coding	6550.59	-0.424151	0.0348673	-12.1647	4.79039e-34	1.24807e-32
TRIM25	ENSG00000121060.10	protein_coding	1013.1	0.951492	0.0782455	12.1604	5.05406e-34	1.31463e-32
KLF10	ENSG00000155090.10	protein_coding	397.076	1.66491	0.136938	12.1581	5.19416e-34	1.34888e-32
CTSA	ENSG00000064601.12	protein_coding	2901.7	-0.611064	0.0503	-12.1484	5.84956e-34	1.51663e-32
RBCK1	ENSG00000125826.15	protein_coding	1133.53	-0.961601	0.0791686	-12.1462	6.00628e-34	1.55474e-32
PODXL	ENSG00000128567.12	protein_coding	2425.63	-0.650562	0.0535751	-12.143	6.25006e-34	1.61524e-32
C19orf48	ENSG00000167747.9	protein_coding	409.917	-1.63062	0.134324	-12.1395	6.52378e-34	1.68326e-32
MCM5	ENSG00000100297.11	protein_coding	545.73	-1.3717	0.113121	-12.126	7.69302e-34	1.98176e-32
ATP1A1OS	ENSG00000203865.5	processed_transcript	3904.66	0.501109	0.0413459	12.1199	8.28512e-34	2.13086e-32
TNFRSF12A	ENSG00000006327.9	protein_coding	1054.79	-0.963821	0.0795842	-12.1107	9.26998e-34	2.38033e-32
LNPEP	ENSG00000113441.11	protein_coding	563.452	1.33208	0.110028	12.1067	9.73183e-34	2.49493e-32
PFKFB4	ENSG00000114268.7	protein_coding	396.825	1.57056	0.129906	12.09	1.19298e-33	3.05353e-32
NET1	ENSG00000173848.14	protein_coding	1461.28	0.813368	0.0673252	12.0812	1.32804e-33	3.39381e-32
GOLGA4	ENSG00000144674.12	protein_coding	2969.94	0.615407	0.0510016	12.0664	1.589e-33	4.05423e-32
UBAP2L	ENSG00000143569.14	protein_coding	3317.17	0.563867	0.0468205	12.0432	2.10699e-33	5.3673e-32
ASAH1	ENSG00000104763.13	protein_coding	1248.99	-0.889202	0.0738627	-12.0386	2.22777e-33	5.66595e-32
MATN2	ENSG00000132561.9	protein_coding	238.785	-2.27494	0.189123	-12.0289	2.50468e-33	6.36013e-32
ALCAM	ENSG00000170017.8	protein_coding	2808.91	-0.605876	0.0503733	-12.0277	2.5405e-33	6.44089e-32
SFTA1P	ENSG00000225383.2	lincRNA	235.917	-2.2258	0.185191	-12.019	2.82509e-33	7.15109e-32
GGCX	ENSG00000115486.7	protein_coding	1470.04	0.795565	0.0662779	12.0035	3.40725e-33	8.61109e-32
GPX1	ENSG00000233276.2	protein_coding	1638.05	0.752878	0.0627695	11.9943	3.80517e-33	9.60161e-32
CEBPD	ENSG00000221869.4	protein_coding	239.373	1.98606	0.165715	11.9848	4.26925e-33	1.07557e-31
CD320	ENSG00000167775.6	protein_coding	906.732	-1.08789	0.0908645	-11.9727	4.9423e-33	1.24318e-31
PROM2	ENSG00000155066.11	protein_coding	73.6768	4.6353	0.387635	11.9579	5.90296e-33	1.4825e-31
SPIRE1	ENSG00000134278.10	protein_coding	1677.49	-0.855834	0.0717974	-11.9201	9.29589e-33	2.33096e-31
COPA	ENSG00000122218.10	protein_coding	2730.1	0.577854	0.0486592	11.8755	1.58635e-32	3.97156e-31
KLHL21	ENSG00000162413.12	protein_coding	611.57	-1.26191	0.106565	-11.8417	2.37594e-32	5.93911e-31
MMP24-AS1	ENSG00000126005.11	antisense	1323.97	0.824114	0.0695973	11.8412	2.39058e-32	5.96639e-31
C10orf54	ENSG00000107738.15	protein_coding	165.803	-2.78633	0.235315	-11.8408	2.40029e-32	5.98132e-31
ATXN1	ENSG00000124788.13	protein_coding	524.066	1.29967	0.109812	11.8354	2.56126e-32	6.37252e-31
CDCA7L	ENSG00000164649.15	protein_coding	885.175	-1.07892	0.0914116	-11.8029	3.77175e-32	9.36973e-31
NAP1L1	ENSG00000187109.9	protein_coding	10294.3	-0.325569	0.0275998	-11.7961	4.09004e-32	1.01447e-30
CDC20	ENSG00000117399.9	protein_coding	564.973	-1.3457	0.114497	-11.7531	6.80682e-32	1.68571e-30
FAH	ENSG00000103876.7	protein_coding	384.36	1.53435	0.130687	11.7407	7.88733e-32	1.95029e-30
CNPY3	ENSG00000137161.12	protein_coding	1444.81	-0.90879	0.0774131	-11.7395	7.9971e-32	1.97438e-30
C6orf132	ENSG00000188112.4	protein_coding	853.049	-1.04224	0.0888018	-11.7367	8.26654e-32	2.03777e-30
SCN5A	ENSG00000183873.11	protein_coding	358.388	-1.76869	0.150797	-11.7289	9.06145e-32	2.23029e-30
CYTH4	ENSG00000100055.16	protein_coding	90.29	3.6509	0.311431	11.723	9.71839e-32	2.38831e-30
CALM3	ENSG00000160014.12	protein_coding	2881.22	0.555195	0.047371	11.7201	1.00511e-31	2.46629e-30
CHD8	ENSG00000100888.8	protein_coding	1164.29	0.908109	0.0775278	11.7133	1.08907e-31	2.66822e-30
NPEPPS	ENSG00000141279.11	protein_coding	1525.23	0.75805	0.0647514	11.7071	1.17253e-31	2.86831e-30
ARHGEF18	ENSG00000104880.13	protein_coding	709.654	-1.15285	0.0985494	-11.6982	1.30123e-31	3.1783e-30
SAV1	ENSG00000151748.10	protein_coding	1352.25	-0.824739	0.0705118	-11.6965	1.32874e-31	3.24054e-30
YBX1	ENSG00000065978.13	protein_coding	12642.8	0.290619	0.0248502	11.6948	1.35456e-31	3.2985e-30
GRN	ENSG00000030582.12	protein_coding	4211.41	-0.476177	0.0407497	-11.6854	1.51341e-31	3.67972e-30
FBN1	ENSG00000166147.9	protein_coding	765.384	1.04736	0.0896404	11.684	1.53897e-31	3.73619e-30
RPL9	ENSG00000163682.11	protein_coding	4254.72	-0.491975	0.0421285	-11.678	1.65205e-31	4.00467e-30
CSF1	ENSG00000184371.9	protein_coding	5365.79	-0.441683	0.0378237	-11.6774	1.66262e-31	4.0242e-30
ZMYM4	ENSG00000146463.7	protein_coding	760.343	1.10112	0.0943847	11.6663	1.89588e-31	4.58184e-30
PYCR1	ENSG00000183010.12	protein_coding	964.406	-0.967382	0.0830085	-11.654	2.1891e-31	5.28251e-30
EP300	ENSG00000100393.9	protein_coding	1157.74	0.894962	0.0768858	11.6402	2.57559e-31	6.20582e-30
GALNT1	ENSG00000141429.9	protein_coding	1614.13	0.729165	0.0627918	11.6124	3.56394e-31	8.57432e-30
MTR	ENSG00000116984.8	protein_coding	652.501	1.13342	0.0976447	11.6076	3.76943e-31	9.05511e-30
SHC1	ENSG00000160691.14	protein_coding	1677.37	0.72768	0.0627486	11.5967	4.28049e-31	1.02674e-29
UBXN7	ENSG00000163960.7	protein_coding	780.304	1.0471	0.0904528	11.5762	5.44131e-31	1.30323e-29
STMN1	ENSG00000117632.16	protein_coding	4491.99	-0.449625	0.0388492	-11.5736	5.60744e-31	1.34101e-29
BOD1L1	ENSG00000038219.8	protein_coding	1538.35	0.749334	0.064881	11.5494	7.43611e-31	1.77569e-29
DOCK5	ENSG00000147459.13	protein_coding	666.897	1.11911	0.0969145	11.5474	7.60503e-31	1.81333e-29
FLOT2	ENSG00000132589.11	protein_coding	1048.22	0.897982	0.077821	11.5391	8.38271e-31	1.99578e-29
NSMAF	ENSG00000035681.3	protein_coding	660.68	-1.17118	0.101522	-11.5361	8.67429e-31	2.06214e-29
CTNNB1	ENSG00000168036.12	protein_coding	3225.91	0.534081	0.0463072	11.5334	8.95102e-31	2.12477e-29
ZNF704	ENSG00000164684.9	protein_coding	225.805	-2.21065	0.191683	-11.5329	9.01014e-31	2.13564e-29
PLEKHM2	ENSG00000116786.7	protein_coding	845.502	-1.07973	0.0937024	-11.523	1.01015e-30	2.39079e-29
JMJD1C	ENSG00000171988.13	protein_coding	1079.62	0.881966	0.0765644	11.5193	1.05502e-30	2.4933e-29
IMPDH1	ENSG00000106348.12	protein_coding	531.596	1.28841	0.111962	11.5076	1.20804e-30	2.85073e-29
C17orf76-AS1	ENSG00000175061.13	processed_transcript	5514.46	-0.407322	0.0354039	-11.505	1.24441e-30	2.93223e-29
REST	ENSG00000084093.11	protein_coding	531.018	1.32261	0.114995	11.5015	1.29614e-30	3.04964e-29
AK5	ENSG00000154027.14	protein_coding	348.639	-1.68658	0.146656	-11.5002	1.3154e-30	3.09041e-29
DHCR24	ENSG00000116133.7	protein_coding	6429.35	-0.378342	0.0329327	-11.4883	1.50978e-30	3.54191e-29
YARS	ENSG00000134684.6	protein_coding	3085.55	-0.555213	0.0483697	-11.4785	1.69135e-30	3.96207e-29
FKBP1A	ENSG00000088832.10	protein_coding	6042.09	-0.387762	0.0338129	-11.4679	1.91291e-30	4.47453e-29
RMRP	ENSG00000269900.2	lincRNA	62.5519	4.72459	0.412323	11.4585	2.13297e-30	4.982e-29
PXDC1	ENSG00000168994.9	protein_coding	776.565	-1.06447	0.092932	-11.4543	2.23741e-30	5.21835e-29
ARID1A	ENSG00000117713.13	protein_coding	1227.05	0.826088	0.0721233	11.4538	2.25015e-30	5.24043e-29
PLP2	ENSG00000102007.6	protein_coding	5642.82	0.415069	0.0362565	11.4481	2.40245e-30	5.58701e-29
UBA1	ENSG00000130985.12	protein_coding	3810.21	0.486471	0.0425267	11.4392	2.66376e-30	6.18572e-29
FAM127A	ENSG00000134590.9	protein_coding	1889.46	0.668508	0.05845	11.4373	2.72297e-30	6.31406e-29
EEF1D	ENSG00000104529.13	protein_coding	3887.99	-0.528291	0.0462266	-11.4283	3.02024e-30	6.99326e-29
SH2D5	ENSG00000189410.7	protein_coding	142.86	-2.98299	0.261063	-11.4263	3.08873e-30	7.14151e-29
ALDOA	ENSG00000149925.12	protein_coding	9209.54	0.321875	0.028192	11.4172	3.42969e-30	7.91844e-29
KDM5A	ENSG00000073614.7	protein_coding	410.981	1.44438	0.126513	11.4169	3.44464e-30	7.94152e-29
PHC3	ENSG00000173889.11	protein_coding	371.243	1.52066	0.133295	11.4082	3.80456e-30	8.7587e-29
AK4	ENSG00000162433.10	protein_coding	1216.49	0.815164	0.0714659	11.4063	3.88761e-30	8.92423e-29
C12orf75	ENSG00000235162.4	protein_coding	857.724	-1.0255	0.0899052	-11.4064	3.88413e-30	8.92423e-29
EDIL3	ENSG00000164176.8	protein_coding	981.751	-1.00816	0.0884271	-11.401	4.13301e-30	9.474e-29
ZFR	ENSG00000056097.11	protein_coding	1718.76	0.713885	0.062687	11.3881	4.79393e-30	1.09733e-28
RETSAT	ENSG00000042445.9	protein_coding	890.739	0.959481	0.0843282	11.3779	5.38644e-30	1.2312e-28
EIF3A	ENSG00000107581.8	protein_coding	6637.52	0.368319	0.0323902	11.3713	5.81044e-30	1.32622e-28
SDCBP	ENSG00000137575.7	protein_coding	2958.74	-0.542322	0.0477183	-11.3651	6.24173e-30	1.42264e-28
RP11-54A9.1	ENSG00000257219.1	lincRNA	122.572	-3.36349	0.296124	-11.3584	6.73699e-30	1.53333e-28
MTUS1	ENSG00000129422.9	protein_coding	228.859	-2.13792	0.188232	-11.3579	6.77521e-30	1.53985e-28
KIF13B	ENSG00000197892.8	protein_coding	453.912	1.32464	0.116639	11.3568	6.86274e-30	1.55753e-28
NUMA1	ENSG00000137497.13	protein_coding	2566.86	0.575327	0.0507463	11.3373	8.57391e-30	1.94314e-28
PLEKHA7	ENSG00000166689.10	protein_coding	579.209	-1.22567	0.108116	-11.3366	8.6422e-30	1.95585e-28
PGM1	ENSG00000079739.11	protein_coding	1893.13	0.702837	0.0622104	11.2977	1.34639e-29	3.04277e-28
LGALS3BP	ENSG00000108679.8	protein_coding	6164.94	-0.37837	0.0335021	-11.2939	1.40604e-29	3.17309e-28
FAM13A	ENSG00000138640.10	protein_coding	519.465	1.24713	0.110435	11.2929	1.42283e-29	3.20648e-28
TMEM147	ENSG00000105677.7	protein_coding	581.312	-1.22185	0.108297	-11.2824	1.60245e-29	3.60619e-28
DPYD	ENSG00000188641.8	protein_coding	548.628	1.30654	0.115806	11.2822	1.60764e-29	3.6128e-28
CDA	ENSG00000158825.5	protein_coding	816.672	-1.06043	0.0940425	-11.2761	1.72205e-29	3.86447e-28
YLPM1	ENSG00000119596.13	protein_coding	1823.99	0.689274	0.061144	11.273	1.7844e-29	3.9988e-28
SF3B1	ENSG00000115524.11	protein_coding	2364.92	0.613646	0.0544451	11.2709	1.82638e-29	4.08716e-28
NPC1	ENSG00000141458.8	protein_coding	3424.02	-0.504602	0.0447777	-11.2691	1.86558e-29	4.16907e-28
FAM102A	ENSG00000167106.7	protein_coding	864.364	-1.05593	0.0937706	-11.2607	2.05023e-29	4.57533e-28
AP2M1	ENSG00000161203.9	protein_coding	3011.67	0.549836	0.0488483	11.256	2.16339e-29	4.82113e-28
LRRC8D	ENSG00000171492.10	protein_coding	343.21	-1.6317	0.144979	-11.2547	2.19471e-29	4.88414e-28
SMG1	ENSG00000157106.12	protein_coding	1005.95	0.896366	0.0796578	11.2527	2.24573e-29	4.99075e-28
TRPS1	ENSG00000104447.7	protein_coding	414.498	1.43772	0.127816	11.2484	2.35932e-29	5.23592e-28
SH3KBP1	ENSG00000147010.13	protein_coding	1636.27	0.720546	0.0640607	11.2479	2.373e-29	5.259e-28
ZNF292	ENSG00000188994.8	protein_coding	328.589	1.55442	0.138505	11.2228	3.14978e-29	6.97085e-28
ACPL2	ENSG00000155893.7	protein_coding	148.61	2.54324	0.226636	11.2217	3.18955e-29	7.04913e-28
IGFBP7-AS1	ENSG00000245067.2	antisense	751.357	-1.1051	0.098486	-11.2209	3.21997e-29	7.10656e-28
RPL4	ENSG00000174444.10	protein_coding	11432.5	-0.30458	0.0271673	-11.2113	3.59031e-29	7.913e-28
JUP	ENSG00000173801.12	protein_coding	877.145	0.975598	0.0870343	11.2093	3.66889e-29	8.07508e-28
ZC3H13	ENSG00000123200.12	protein_coding	833.324	1.04728	0.0935379	11.1964	4.2487e-29	9.3384e-28
THEM6	ENSG00000130193.7	protein_coding	440.155	-1.43364	0.128079	-11.1933	4.3953e-29	9.64738e-28
REEP5	ENSG00000129625.8	protein_coding	2117.97	-0.673899	0.0602108	-11.1923	4.44634e-29	9.74606e-28
NIN	ENSG00000100503.19	protein_coding	1026.72	0.881875	0.0788839	11.1794	5.14358e-29	1.1259e-27
RBPJ	ENSG00000168214.16	protein_coding	1967.33	0.646494	0.0578781	11.1699	5.72234e-29	1.25087e-27
G6PD	ENSG00000160211.11	protein_coding	2033.94	0.635065	0.0569638	11.1486	7.27564e-29	1.58676e-27
APCDD1L	ENSG00000198768.6	protein_coding	161.389	2.27438	0.204007	11.1485	7.27872e-29	1.58676e-27
LPP	ENSG00000145012.8	protein_coding	759.058	1.01831	0.0913849	11.1431	7.74063e-29	1.68516e-27
ARID4A	ENSG00000032219.14	protein_coding	444.374	1.37417	0.123326	11.1426	7.78136e-29	1.69173e-27
GLRX	ENSG00000173221.9	protein_coding	1133.63	0.850557	0.0763367	11.1422	7.81819e-29	1.69744e-27
PTBP1	ENSG00000011304.12	protein_coding	2671.5	-0.56865	0.0510749	-11.1337	8.60343e-29	1.8654e-27
GNG12	ENSG00000172380.5	protein_coding	2118.86	-0.635029	0.0571058	-11.1202	1.00008e-28	2.16545e-27
AREG	ENSG00000109321.6	protein_coding	132.955	2.64575	0.238075	11.1131	1.08382e-28	2.34359e-27
VPS13B	ENSG00000132549.14	protein_coding	614.045	1.14796	0.103348	11.1077	1.15031e-28	2.48402e-27
SPDEF	ENSG00000124664.6	protein_coding	858.106	0.989276	0.0891441	11.0975	1.29013e-28	2.78221e-27
ANP32B	ENSG00000136938.8	protein_coding	2857.35	-0.535112	0.0482717	-11.0854	1.47641e-28	3.17964e-27
SF3B3	ENSG00000189091.8	protein_coding	2376.42	0.577708	0.0521691	11.0738	1.68191e-28	3.61735e-27
AC008440.5	ENSG00000232220.2	antisense	673.781	1.12476	0.101583	11.0723	1.70871e-28	3.67006e-27
VPS13C	ENSG00000129003.11	protein_coding	283.887	1.69975	0.153616	11.0649	1.85632e-28	3.98178e-27
FHOD3	ENSG00000134775.11	protein_coding	439.963	1.30821	0.118299	11.0586	1.99275e-28	4.26869e-27
SPTAN1	ENSG00000197694.9	protein_coding	3498.81	0.479547	0.0434253	11.043	2.36933e-28	5.0686e-27
ZFP36	ENSG00000128016.4	protein_coding	442.591	1.3471	0.122128	11.0303	2.72972e-28	5.83178e-27
ATM	ENSG00000149311.13	protein_coding	437.555	1.424	0.129313	11.0121	3.34118e-28	7.12859e-27
IFRD2	ENSG00000214706.6	protein_coding	642.046	-1.16383	0.105745	-11.006	3.57483e-28	7.61695e-27
ACOX2	ENSG00000168306.8	protein_coding	82.4132	3.60054	0.327227	11.0032	3.68879e-28	7.84933e-27
RPL12	ENSG00000197958.8	protein_coding	11836.6	0.281036	0.0255514	10.9988	3.87066e-28	8.2254e-27
NRBP2	ENSG00000185189.11	protein_coding	330.84	1.51746	0.13798	10.9977	3.91998e-28	8.31918e-27
RPL19	ENSG00000108298.5	protein_coding	11633	-0.285789	0.0259911	-10.9957	4.00887e-28	8.49658e-27
PPP2R2C	ENSG00000074211.9	protein_coding	222.085	1.89416	0.172527	10.9789	4.82588e-28	1.02147e-26
LIMA1	ENSG00000050405.9	protein_coding	1259.36	-0.822039	0.0749135	-10.9732	5.14305e-28	1.08717e-26
ELL2	ENSG00000118985.10	protein_coding	1576.15	0.737831	0.0672427	10.9727	5.17253e-28	1.09195e-26
VAT1	ENSG00000108828.11	protein_coding	4807.24	-0.442336	0.0403447	-10.9639	5.69785e-28	1.20127e-26
ITPR1	ENSG00000150995.13	protein_coding	181.899	2.12494	0.19394	10.9567	6.17314e-28	1.29977e-26
CCNB1	ENSG00000134057.10	protein_coding	650.996	-1.11878	0.102216	-10.9453	6.99948e-28	1.47182e-26
OBFC1	ENSG00000107960.6	protein_coding	507.443	1.21023	0.110743	10.9283	8.44394e-28	1.77323e-26
P4HA2	ENSG00000072682.14	protein_coding	720.813	1.0187	0.0932449	10.925	8.75458e-28	1.83605e-26
RAD23A	ENSG00000179262.5	protein_coding	2809.89	-0.576437	0.0528124	-10.9148	9.79338e-28	2.05123e-26
TOX2	ENSG00000124191.13	protein_coding	523.737	1.20168	0.110195	10.905	1.09124e-27	2.28264e-26
ADI1	ENSG00000182551.9	protein_coding	1640.49	-0.782006	0.0717386	-10.9008	1.14293e-27	2.38764e-26
EEA1	ENSG00000102189.12	protein_coding	983.199	0.91521	0.0840039	10.8949	1.21966e-27	2.54461e-26
TMPO	ENSG00000120802.9	protein_coding	1261.66	-0.790999	0.0726258	-10.8914	1.26638e-27	2.63866e-26
ALDOC	ENSG00000109107.9	protein_coding	382.738	1.5258	0.140167	10.8856	1.34982e-27	2.80884e-26
RP11-129B22.1	ENSG00000241111.1	antisense	81.6193	3.44684	0.316917	10.8761	1.49773e-27	3.1126e-26
XPOT	ENSG00000184575.7	protein_coding	3054.95	-0.522637	0.0481366	-10.8574	1.83997e-27	3.81888e-26
CAPRIN2	ENSG00000110888.13	protein_coding	384.35	1.46501	0.13523	10.8335	2.38849e-27	4.95094e-26
ATP6AP1	ENSG00000071553.12	protein_coding	2341.4	-0.583311	0.0538502	-10.8321	2.42514e-27	5.02042e-26
IRS2	ENSG00000185950.7	protein_coding	441.959	1.34085	0.123944	10.8182	2.82287e-27	5.83623e-26
EMP2	ENSG00000213853.5	protein_coding	639.084	1.07986	0.099832	10.8167	2.86775e-27	5.92138e-26
HINT1	ENSG00000169567.7	protein_coding	1771.73	-0.676131	0.0625163	-10.8153	2.91428e-27	6.00971e-26
RPL3	ENSG00000100316.11	protein_coding	11183.7	-0.305113	0.0282355	-10.806	3.22365e-27	6.63914e-26
ZNF638	ENSG00000075292.14	protein_coding	950.511	0.93353	0.0863983	10.805	3.26098e-27	6.7074e-26
NEXN	ENSG00000162614.14	protein_coding	663.281	-1.12812	0.104428	-10.8028	3.33734e-27	6.85566e-26
MGA	ENSG00000174197.12	protein_coding	604.408	1.13999	0.105629	10.7923	3.741e-27	7.67503e-26
TMEM38A	ENSG00000072954.2	protein_coding	533.628	-1.22049	0.113135	-10.788	3.92343e-27	8.03901e-26
PFKP	ENSG00000067057.12	protein_coding	3063.09	0.54902	0.0509278	10.7803	4.26277e-27	8.72316e-26
BST2	ENSG00000130303.8	protein_coding	1706.48	0.680658	0.0631632	10.7762	4.46068e-27	9.11651e-26
ZFC3H1	ENSG00000133858.11	protein_coding	536.855	1.1681	0.108446	10.7713	4.70435e-27	9.60227e-26
TLE3	ENSG00000140332.11	protein_coding	499.516	1.27876	0.118915	10.7536	5.69984e-27	1.16194e-25
HNRNPA0	ENSG00000177733.4	protein_coding	1296.5	-0.776292	0.0722101	-10.7505	5.89716e-27	1.20064e-25
SEMA4D	ENSG00000187764.7	protein_coding	348.135	1.4592	0.135759	10.7484	6.02839e-27	1.2258e-25
DYNC2H1	ENSG00000187240.9	protein_coding	201.947	2.06915	0.19261	10.7427	6.41587e-27	1.30293e-25
FAM83A	ENSG00000147689.12	protein_coding	440.479	1.28401	0.11955	10.7404	6.57763e-27	1.33409e-25
OAS2	ENSG00000111335.8	protein_coding	473.691	1.22113	0.113716	10.7384	6.72289e-27	1.36183e-25
SPAG4	ENSG00000061656.5	protein_coding	91.3339	3.16324	0.294778	10.731	7.28415e-27	1.47366e-25
MUC1	ENSG00000185499.12	protein_coding	146.881	2.28918	0.213371	10.7287	7.46748e-27	1.50885e-25
MRPL16	ENSG00000166902.4	protein_coding	423.827	1.29909	0.121174	10.7208	8.12981e-27	1.6406e-25
RPL13	ENSG00000167526.9	protein_coding	8395.46	-0.357426	0.0333619	-10.7136	8.78814e-27	1.77123e-25
NEMF	ENSG00000165525.13	protein_coding	1209.55	0.786447	0.0734108	10.713	8.84819e-27	1.78109e-25
hsa-mir-6723	ENSG00000237973.1	pseudogene	1482.14	0.777776	0.0726146	10.711	9.03626e-27	1.81666e-25
ZNF804A	ENSG00000170396.6	protein_coding	224.03	-1.97321	0.184233	-10.7104	9.09787e-27	1.82676e-25
RASSF4	ENSG00000107551.16	protein_coding	247.244	1.7179	0.160425	10.7084	9.29071e-27	1.86314e-25
LPIN1	ENSG00000134324.7	protein_coding	1538.4	0.692058	0.0646648	10.7022	9.93472e-27	1.9898e-25
FZD2	ENSG00000180340.5	protein_coding	397.897	-1.42164	0.132978	-10.6908	1.12373e-26	2.24787e-25
MT1E	ENSG00000169715.10	protein_coding	4764.65	0.46183	0.0433094	10.6635	1.50794e-26	3.01269e-25
LDB3	ENSG00000122367.15	protein_coding	50.7191	4.66271	0.437282	10.6629	1.51732e-26	3.02766e-25
ZMYM2	ENSG00000121741.12	protein_coding	317.222	1.56031	0.146374	10.6597	1.57089e-26	3.13064e-25
PTMS	ENSG00000159335.11	protein_coding	1623.02	0.672302	0.063096	10.6552	1.64844e-26	3.2811e-25
ZRANB2	ENSG00000132485.8	protein_coding	355.521	1.41947	0.133235	10.6538	1.67344e-26	3.32262e-25
NFIA	ENSG00000162599.11	protein_coding	257.842	1.70657	0.160183	10.6539	1.67262e-26	3.32262e-25
ROCK2	ENSG00000134318.9	protein_coding	1155.48	0.813336	0.0763909	10.647	1.80036e-26	3.56579e-25
KIF2C	ENSG00000142945.8	protein_coding	469.413	-1.33586	0.125467	-10.6471	1.79845e-26	3.56579e-25
2001-03-01	ENSG00000145416.9	protein_coding	135.083	-2.71221	0.254914	-10.6397	1.94687e-26	3.8512e-25
PGM5	ENSG00000154330.8	protein_coding	414.478	-1.41814	0.133337	-10.6357	2.03202e-26	4.01468e-25
GMFB	ENSG00000197045.8	protein_coding	1514.19	-0.735748	0.0691843	-10.6346	2.05696e-26	4.05894e-25
RPL32	ENSG00000144713.8	protein_coding	7397.82	-0.332744	0.0313065	-10.6286	2.19374e-26	4.32353e-25
SNRPB	ENSG00000125835.13	protein_coding	932.122	-1.00934	0.0949717	-10.6278	2.21205e-26	4.35427e-25
PHF19	ENSG00000119403.9	protein_coding	489.919	-1.3022	0.122565	-10.6246	2.29084e-26	4.50381e-25
NPM1	ENSG00000181163.9	protein_coding	18523	-0.237515	0.022409	-10.5991	3.00917e-26	5.90882e-25
MAP3K5	ENSG00000197442.8	protein_coding	233.069	1.75566	0.165801	10.589	3.35241e-26	6.57475e-25
ST3GAL5	ENSG00000115525.12	protein_coding	215.258	1.92919	0.182349	10.5797	3.70305e-26	7.25355e-25
ROBO1	ENSG00000169855.15	protein_coding	574.147	1.1436	0.108121	10.577	3.80905e-26	7.45207e-25
SPEN	ENSG00000065526.6	protein_coding	1193.07	0.788528	0.0746014	10.5699	4.10957e-26	8.03021e-25
KB-1208A12.3	ENSG00000245970.2	antisense	3513.42	-0.461511	0.0437048	-10.5597	4.57971e-26	8.93797e-25
MGEA5	ENSG00000198408.9	protein_coding	1025.43	0.926519	0.0878523	10.5463	5.28222e-26	1.02965e-24
ZMIZ1	ENSG00000108175.12	protein_coding	1427.2	0.700962	0.0664886	10.5426	5.49608e-26	1.07003e-24
TAF1	ENSG00000147133.11	protein_coding	585.247	1.11675	0.105976	10.5377	5.78675e-26	1.12526e-24
FTH1	ENSG00000167996.11	protein_coding	21684.8	-0.25358	0.0240705	-10.5349	5.9657e-26	1.15865e-24
COPB2	ENSG00000184432.5	protein_coding	1726.68	0.653842	0.062083	10.5317	6.16827e-26	1.19654e-24
PAPLN	ENSG00000100767.11	protein_coding	64.5037	3.76121	0.357195	10.5298	6.29421e-26	1.21949e-24
LRBA	ENSG00000198589.6	protein_coding	663.29	1.01563	0.0965015	10.5245	6.65903e-26	1.28862e-24
CCDC86	ENSG00000110104.7	protein_coding	716.718	-1.05352	0.100188	-10.5154	7.33812e-26	1.41832e-24
PHIP	ENSG00000146247.13	protein_coding	369.634	1.35934	0.129322	10.5113	7.66561e-26	1.47983e-24
PTX3	ENSG00000163661.3	protein_coding	899.092	-0.913588	0.08692	-10.5107	7.71433e-26	1.48745e-24
ACADVL	ENSG00000072778.15	protein_coding	1137.22	0.777197	0.0739553	10.509	7.85179e-26	1.51213e-24
COMMD7	ENSG00000149600.7	protein_coding	1069.52	-0.905592	0.0861874	-10.5072	8.00012e-26	1.53885e-24
DAP	ENSG00000112977.11	protein_coding	4561.73	-0.417002	0.0397704	-10.4852	1.00994e-25	1.94031e-24
LRRC2	ENSG00000163827.8	protein_coding	116.795	-3.10074	0.29577	-10.4836	1.02733e-25	1.97137e-24
KPNA2	ENSG00000182481.4	protein_coding	1609.4	-0.693221	0.0661418	-10.4808	1.05799e-25	2.02778e-24
RPL34	ENSG00000109475.12	protein_coding	3457.35	-0.51115	0.0487791	-10.4789	1.08025e-25	2.06797e-24
RPS9	ENSG00000170889.9	protein_coding	2562.1	-0.541495	0.0516764	-10.4786	1.08374e-25	2.07217e-24
CSF3	ENSG00000108342.8	protein_coding	55.1095	4.221	0.403475	10.4616	1.29625e-25	2.47554e-24
BCL9L	ENSG00000186174.8	protein_coding	1876.75	0.60968	0.0583019	10.4573	1.35684e-25	2.58818e-24
CAMK1D	ENSG00000183049.8	protein_coding	411.571	1.30278	0.124596	10.456	1.37506e-25	2.61981e-24
C6orf201	ENSG00000185689.11	protein_coding	517.924	1.14044	0.109138	10.4495	1.47285e-25	2.80278e-24
AC068134.8	ENSG00000224516.1	antisense	121.648	-3.09402	0.296296	-10.4423	1.58868e-25	3.01963e-24
TRIM38	ENSG00000112343.8	protein_coding	601.744	1.08483	0.103915	10.4396	1.63438e-25	3.10281e-24
FBL	ENSG00000105202.3	protein_coding	1392.29	-0.721252	0.069107	-10.4367	1.68485e-25	3.19105e-24
RPL23A	ENSG00000198242.9	protein_coding	5583.15	-0.385058	0.0368941	-10.4368	1.6833e-25	3.19105e-24
CYLD	ENSG00000083799.13	protein_coding	487.076	-1.27203	0.122191	-10.4102	2.22753e-25	4.21389e-24
RAPGEF1	ENSG00000107263.14	protein_coding	1035.2	-0.835606	0.0802798	-10.4087	2.26335e-25	4.27661e-24
CTNS	ENSG00000040531.10	protein_coding	305.622	-1.60412	0.154143	-10.4067	2.3105e-25	4.36056e-24
CST3	ENSG00000101439.4	protein_coding	5462.85	0.367155	0.0353013	10.4006	2.46326e-25	4.6434e-24
EIF4G3	ENSG00000075151.15	protein_coding	1593.17	0.672289	0.0647852	10.3772	3.14874e-25	5.92859e-24
RTN4	ENSG00000115310.13	protein_coding	9329.99	-0.295298	0.0284638	-10.3745	3.23767e-25	6.08887e-24
FOXP1	ENSG00000114861.14	protein_coding	873.618	0.892439	0.0860362	10.3728	3.29601e-25	6.19133e-24
CCDC85B	ENSG00000175602.2	protein_coding	690.235	-1.01938	0.098306	-10.3694	3.41574e-25	6.4087e-24
AHNAK2	ENSG00000185567.6	protein_coding	1413.48	0.695708	0.0671396	10.3621	3.68737e-25	6.91026e-24
MOSPD1	ENSG00000101928.8	protein_coding	507.605	-1.21634	0.117555	-10.3469	4.32042e-25	8.08717e-24
COTL1	ENSG00000103187.6	protein_coding	3697.98	0.439913	0.0426504	10.3144	6.06607e-25	1.13415e-23
ASUN	ENSG00000064102.10	protein_coding	437.351	1.25953	0.122254	10.3026	6.85929e-25	1.28096e-23
SUN3	ENSG00000164744.8	protein_coding	113.05	-2.95685	0.287051	-10.3008	6.98893e-25	1.30365e-23
BCL7A	ENSG00000110987.4	protein_coding	267.647	-1.77517	0.172548	-10.288	7.98102e-25	1.48698e-23
PSEN2	ENSG00000143801.12	protein_coding	468.172	-1.35459	0.131745	-10.2819	8.5037e-25	1.58252e-23
NSD1	ENSG00000165671.14	protein_coding	791.682	0.935124	0.0910587	10.2695	9.67359e-25	1.79814e-23
NOL6	ENSG00000165271.12	protein_coding	459.713	-1.26121	0.122863	-10.2652	1.0115e-24	1.87802e-23
SLC7A1	ENSG00000139514.8	protein_coding	1864.34	-0.613111	0.0597708	-10.2577	1.09276e-24	2.02654e-23
USMG5	ENSG00000173915.8	protein_coding	1207.34	0.736266	0.0718454	10.2479	1.20916e-24	2.23981e-23
SMIM13	ENSG00000224531.4	protein_coding	491.578	-1.20181	0.11735	-10.2412	1.29577e-24	2.39748e-23
CRY1	ENSG00000008405.7	protein_coding	264.532	-1.74827	0.17073	-10.2399	1.31319e-24	2.42689e-23
KIAA0368	ENSG00000136813.10	protein_coding	1970.92	0.589924	0.0576109	10.2398	1.31505e-24	2.42754e-23
SRM	ENSG00000116649.5	protein_coding	1094.61	-0.833105	0.0813712	-10.2383	1.33519e-24	2.46188e-23
EMP3	ENSG00000142227.6	protein_coding	3042.57	-0.485994	0.0474692	-10.2381	1.33845e-24	2.46506e-23
MAP4K5	ENSG00000012983.7	protein_coding	1284.42	-0.7475	0.0732243	-10.2084	1.81928e-24	3.34676e-23
ARRB2	ENSG00000141480.13	protein_coding	209.5	-1.9496	0.191012	-10.2067	1.85053e-24	3.40036e-23
SORT1	ENSG00000134243.7	protein_coding	1708.66	0.623443	0.0611662	10.1926	2.13945e-24	3.92674e-23
DECR1	ENSG00000104325.2	protein_coding	473.868	1.1738	0.115172	10.1917	2.15908e-24	3.95822e-23
AAK1	ENSG00000115977.14	protein_coding	152.895	2.21323	0.217199	10.1898	2.20143e-24	4.03126e-23
PPP1R14B	ENSG00000173457.6	protein_coding	2251.33	-0.594013	0.0582967	-10.1895	2.20928e-24	4.04101e-23
RPP25	ENSG00000178718.5	protein_coding	372.42	-1.38304	0.135737	-10.1891	2.21795e-24	4.05225e-23
ATRN	ENSG00000088812.13	protein_coding	701.753	0.958424	0.094094	10.1858	2.29445e-24	4.18724e-23
KCNN4	ENSG00000104783.7	protein_coding	282.539	1.55106	0.152292	10.1848	2.31854e-24	4.22639e-23
IRAK3	ENSG00000090376.4	protein_coding	84.477	3.07319	0.301863	10.1807	2.41736e-24	4.39653e-23
ANKRD17	ENSG00000132466.13	protein_coding	1992.84	0.663597	0.0651814	10.1808	2.41608e-24	4.39653e-23
RPS25	ENSG00000118181.6	protein_coding	5666.51	0.355267	0.0349365	10.1689	2.72908e-24	4.95783e-23
PCNA	ENSG00000132646.6	protein_coding	1099.97	-0.796644	0.0783927	-10.1622	2.92348e-24	5.30497e-23
MYL12B	ENSG00000118680.8	protein_coding	5937.44	-0.357432	0.0351745	-10.1617	2.9398e-24	5.32855e-23
IK	ENSG00000113141.11	protein_coding	2035.14	0.566094	0.0557776	10.1491	3.34352e-24	6.05348e-23
UPF2	ENSG00000151461.15	protein_coding	590.514	1.11554	0.109935	10.1473	3.40827e-24	6.16373e-23
ROCK1	ENSG00000067900.6	protein_coding	1371.43	0.722666	0.0712876	10.1373	3.77259e-24	6.81491e-23
AGO2	ENSG00000123908.7	protein_coding	551.083	1.06559	0.105145	10.1344	3.88635e-24	7.0125e-23
TNKS1BP1	ENSG00000149115.9	protein_coding	988.224	0.819865	0.0809598	10.1268	4.20127e-24	7.57221e-23
HERPUD1	ENSG00000051108.10	protein_coding	2089.8	-0.578849	0.0572288	-10.1146	4.75761e-24	8.5653e-23
TGFBR3	ENSG00000069702.6	protein_coding	248.555	-1.74349	0.172707	-10.0951	5.80877e-24	1.0446e-22
PRPS2	ENSG00000101911.8	protein_coding	515.011	-1.18361	0.117265	-10.0934	5.90744e-24	1.06115e-22
NUDC	ENSG00000090273.9	protein_coding	2280.73	-0.55078	0.054579	-10.0914	6.02879e-24	1.08174e-22
CDT1	ENSG00000167513.4	protein_coding	219.584	-1.84439	0.182818	-10.0887	6.20033e-24	1.11127e-22
PTPRF	ENSG00000142949.12	protein_coding	1936.28	-0.606186	0.0601045	-10.0855	6.40131e-24	1.14601e-22
ADAM19	ENSG00000135074.11	protein_coding	310.635	1.45234	0.14404	10.0829	6.57722e-24	1.17619e-22
EIF3L	ENSG00000100129.13	protein_coding	2324.1	-0.543461	0.0539129	-10.0804	6.74826e-24	1.20543e-22
RP11-867G23.3	ENSG00000245156.1	lincRNA	968.33	0.818789	0.0813219	10.0685	7.61421e-24	1.3586e-22
HOOK3	ENSG00000168172.4	protein_coding	271.467	1.53623	0.152634	10.0648	7.90751e-24	1.40937e-22
MCOLN1	ENSG00000090674.11	protein_coding	421.35	-1.31893	0.131054	-10.064	7.96611e-24	1.41823e-22
LRP1	ENSG00000123384.9	protein_coding	1454.12	0.666212	0.0662336	10.0585	8.42531e-24	1.49832e-22
B3GALTL	ENSG00000187676.7	protein_coding	212.751	-1.90241	0.189151	-10.0576	8.50247e-24	1.51037e-22
MGST1	ENSG00000008394.8	protein_coding	1412.52	0.678437	0.0674899	10.0524	8.96433e-24	1.59065e-22
NIPAL3	ENSG00000001461.12	protein_coding	1261.6	-0.724863	0.072178	-10.0427	9.89159e-24	1.75324e-22
SLC2A1	ENSG00000117394.15	protein_coding	4472.47	-0.394767	0.0393494	-10.0324	1.09856e-23	1.94499e-22
KIF1B	ENSG00000054523.12	protein_coding	652.246	0.979206	0.0976789	10.0247	1.18672e-23	2.09877e-22
HELZ2	ENSG00000130589.12	protein_coding	308.522	1.41908	0.14156	10.0246	1.18812e-23	2.09892e-22
FGFRL1	ENSG00000127418.10	protein_coding	837.265	0.919495	0.0917688	10.0197	1.24888e-23	2.20383e-22
AC040977.1	ENSG00000269871.1	protein_coding	1721.02	-0.622968	0.0621993	-10.0157	1.3008e-23	2.29293e-22
PDLIM1	ENSG00000107438.4	protein_coding	1377.44	0.688938	0.0688259	10.0099	1.37921e-23	2.42848e-22
PITPNM3	ENSG00000091622.11	protein_coding	420.217	-1.29264	0.1293	-9.99717	1.56821e-23	2.75822e-22
VPS13A	ENSG00000197969.7	protein_coding	434.09	1.20154	0.120434	9.97675	1.92676e-23	3.38514e-22
LIFR	ENSG00000113594.5	protein_coding	469.674	1.21668	0.122035	9.96991	2.06414e-23	3.62253e-22
VEGFC	ENSG00000150630.2	protein_coding	1193.66	-0.834957	0.0838107	-9.96242	2.2258e-23	3.90197e-22
UBE2C	ENSG00000175063.12	protein_coding	504.83	-1.18653	0.119391	-9.93816	2.84016e-23	4.97354e-22
ETV1	ENSG00000006468.9	protein_coding	890.899	0.888129	0.0894077	9.93347	2.97711e-23	5.20766e-22
MAVS	ENSG00000088888.13	protein_coding	465.872	1.25154	0.126081	9.92652	3.19192e-23	5.57732e-22
RPL27	ENSG00000131469.8	protein_coding	3860.58	-0.412199	0.0415465	-9.9214	3.36022e-23	5.86502e-22
HERC1	ENSG00000103657.9	protein_coding	300.214	1.47127	0.148313	9.92001	3.40717e-23	5.94049e-22
UHRF1	ENSG00000034063.9	processed_transcript	361.201	-1.46187	0.147372	-9.9196	3.42109e-23	5.95827e-22
CSNK1D	ENSG00000141551.10	protein_coding	2571.46	0.509009	0.0513354	9.91536	3.56957e-23	6.21013e-22
BUB1	ENSG00000169679.10	protein_coding	456.791	-1.2611	0.127257	-9.90986	3.7718e-23	6.55484e-22
RPL30	ENSG00000156482.6	protein_coding	6947.19	-0.333162	0.033626	-9.90785	3.84827e-23	6.68048e-22
PRMT5	ENSG00000100462.11	protein_coding	1789.95	-0.609952	0.0617007	-9.88565	4.80443e-23	8.33131e-22
RLIM	ENSG00000131263.8	protein_coding	921.169	0.811942	0.0821509	9.88354	4.90659e-23	8.49927e-22
RIN3	ENSG00000100599.11	protein_coding	279.737	-1.59101	0.161142	-9.87332	5.43352e-23	9.40186e-22
MT2A	ENSG00000125148.6	protein_coding	27827.2	1.12783	0.114434	9.85572	6.47525e-23	1.11923e-21
VPS13D	ENSG00000048707.9	protein_coding	491.217	1.13315	0.114997	9.85371	6.60593e-23	1.14059e-21
MARCKS	ENSG00000155130.5	protein_coding	1206.05	-0.75696	0.0768889	-9.84484	7.21517e-23	1.24444e-21
TOMM20	ENSG00000173726.6	protein_coding	2955.67	-0.47137	0.04791	-9.83866	7.67226e-23	1.32186e-21
BMPR2	ENSG00000204217.8	protein_coding	534.116	1.18395	0.120365	9.83631	7.85396e-23	1.35171e-21
SZRD1	ENSG00000055070.12	protein_coding	2161.25	-0.554049	0.05639	-9.82531	8.76074e-23	1.50615e-21
EDEM3	ENSG00000116406.14	protein_coding	598.699	1.0346	0.105449	9.81142	1.00546e-22	1.72673e-21
DYNC1I2	ENSG00000077380.11	protein_coding	1022.83	0.825783	0.0843271	9.79263	1.21108e-22	2.07764e-21
ACTG1	ENSG00000184009.5	protein_coding	22609.1	0.211528	0.0216341	9.77752	1.40617e-22	2.40975e-21
ARHGDIB	ENSG00000111348.4	protein_coding	1840.29	0.591842	0.0605946	9.76723	1.5565e-22	2.6645e-21
S100A11	ENSG00000163191.5	protein_coding	6318.23	-0.334811	0.0343658	-9.74256	1.98485e-22	3.39417e-21
YAP1	ENSG00000137693.9	protein_coding	2137.6	0.535357	0.0550147	9.73116	2.22041e-22	3.79292e-21
ATP2B1	ENSG00000070961.10	protein_coding	2977.24	0.467248	0.048033	9.72765	2.29848e-22	3.91793e-21
UAP1L1	ENSG00000197355.6	protein_coding	413.906	-1.26383	0.129921	-9.7277	2.29718e-22	3.91793e-21
PKP4	ENSG00000144283.17	protein_coding	852.422	-0.864926	0.0889214	-9.72686	2.31628e-22	3.94407e-21
TPD52L2	ENSG00000101150.13	protein_coding	2475.7	-0.520774	0.0535423	-9.72641	2.32658e-22	3.95741e-21
SRSF3	ENSG00000112081.12	protein_coding	3115.1	-0.456543	0.0469404	-9.72601	2.33569e-22	3.96869e-21
SRP14	ENSG00000140319.6	protein_coding	2549.35	0.504589	0.0519059	9.72122	2.44819e-22	4.15543e-21
NF1	ENSG00000196712.12	protein_coding	475.774	-1.14755	0.118121	-9.71502	2.60198e-22	4.4118e-21
RPL38	ENSG00000172809.8	protein_coding	3684.42	0.408894	0.0421112	9.70986	2.7371e-22	4.636e-21
PEBP1	ENSG00000089220.4	protein_coding	3238.03	-0.442776	0.0456027	-9.70943	2.74878e-22	4.65086e-21
RPS8	ENSG00000142937.7	protein_coding	9672.3	-0.276025	0.0284543	-9.70065	2.99597e-22	5.06376e-21
ZNF460	ENSG00000197714.4	protein_coding	66.6704	3.35592	0.345988	9.69951	3.02943e-22	5.11492e-21
SNHG5	ENSG00000203875.6	processed_transcript	1788.18	-0.592331	0.0610908	-9.69591	3.13835e-22	5.29324e-21
NKTR	ENSG00000114857.13	protein_coding	432.296	1.15229	0.118855	9.69499	3.16682e-22	5.33564e-21
BIRC5	ENSG00000089685.10	protein_coding	339.229	-1.41577	0.146119	-9.68918	3.35193e-22	5.6416e-21
PLCD3	ENSG00000161714.7	protein_coding	1030.72	-0.807923	0.0834562	-9.68081	3.63834e-22	6.11723e-21
DKC1	ENSG00000130826.11	protein_coding	1436.81	-0.672071	0.0694638	-9.67513	3.84596e-22	6.45952e-21
ECE1	ENSG00000117298.10	protein_coding	2342.56	0.533638	0.0551643	9.67362	3.90307e-22	6.54857e-21
ASNS	ENSG00000070669.12	protein_coding	1418.81	-0.709031	0.0732977	-9.6733	3.91543e-22	6.56244e-21
PQLC2	ENSG00000040487.8	protein_coding	266.679	-1.62954	0.168463	-9.67297	3.92821e-22	6.57698e-21
HYI	ENSG00000178922.12	protein_coding	515.442	-1.09807	0.113552	-9.6702	4.03588e-22	6.75021e-21
KCNQ5	ENSG00000185760.11	protein_coding	305.068	-1.57106	0.162598	-9.66226	4.36146e-22	7.28714e-21
LA16c-390E6.5	ENSG00000261641.2	antisense	205.467	-1.81792	0.188179	-9.66062	4.43183e-22	7.397e-21
PLK1	ENSG00000166851.10	protein_coding	298.845	-1.4712	0.152358	-9.65625	4.62492e-22	7.71125e-21
UBL4A	ENSG00000102178.8	protein_coding	566.203	-1.04395	0.108172	-9.6508	4.87758e-22	8.12406e-21
RRP15	ENSG00000067533.5	protein_coding	718.249	-0.924209	0.0958322	-9.64403	5.21002e-22	8.66877e-21
TMCC3	ENSG00000057704.6	protein_coding	262.706	1.48999	0.154645	9.63492	5.69364e-22	9.46361e-21
IL24	ENSG00000162892.11	protein_coding	175.336	-2.02091	0.209915	-9.6273	6.13189e-22	1.01815e-20
USP24	ENSG00000162402.8	protein_coding	1559.18	0.646626	0.0671942	9.62324	6.37902e-22	1.05808e-20
PLA2G16	ENSG00000176485.6	protein_coding	1228.43	-0.713497	0.0741476	-9.62265	6.41546e-22	1.06303e-20
EIF5B	ENSG00000158417.6	protein_coding	3242.33	0.4668	0.0485826	9.60838	7.37023e-22	1.21997e-20
PGRMC2	ENSG00000164040.12	protein_coding	1594.17	-0.633263	0.0659105	-9.60792	7.40277e-22	1.22409e-20
BDNF	ENSG00000176697.14	protein_coding	357.302	-1.32379	0.137924	-9.59796	8.15413e-22	1.34694e-20
AVPI1	ENSG00000119986.6	protein_coding	207.324	-1.80757	0.188372	-9.59573	8.33284e-22	1.37363e-20
TK1	ENSG00000167900.7	protein_coding	366.716	-1.31168	0.136694	-9.59576	8.32975e-22	1.37363e-20
GCC2	ENSG00000135968.15	protein_coding	336.636	1.32602	0.138248	9.5916	8.67304e-22	1.42824e-20
BRWD3	ENSG00000165288.10	protein_coding	505.409	1.08914	0.11357	9.5901	8.80026e-22	1.44771e-20
IGF2	ENSG00000167244.13	protein_coding	166.217	1.91697	0.199918	9.58876	8.91486e-22	1.46505e-20
TOR1AIP2	ENSG00000169905.8	protein_coding	1101.41	0.724156	0.075574	9.58208	9.51094e-22	1.56141e-20
UTP18	ENSG00000011260.9	protein_coding	664.452	-1.0102	0.105483	-9.5769	1.00006e-21	1.64011e-20
FNBP1L	ENSG00000137942.12	protein_coding	590.872	0.979771	0.102427	9.56552	1.11641e-21	1.82906e-20
HIVEP3	ENSG00000127124.9	protein_coding	400.505	1.18432	0.123996	9.55128	1.28108e-21	2.0967e-20
FOXM1	ENSG00000111206.8	protein_coding	652.173	-0.957918	0.100328	-9.54783	1.32444e-21	2.16547e-20
CLASP1	ENSG00000074054.13	protein_coding	567.524	1.04502	0.109471	9.5461	1.34665e-21	2.19952e-20
LAPTM4B	ENSG00000104341.12	protein_coding	991.144	-0.781679	0.0819109	-9.54304	1.38709e-21	2.26327e-20
NCL	ENSG00000115053.11	protein_coding	10454.9	-0.262792	0.0275546	-9.53711	1.46871e-21	2.39401e-20
ST6GALNAC5	ENSG00000117069.10	protein_coding	94.9839	-2.89727	0.304176	-9.52497	1.65092e-21	2.68829e-20
RPS21	ENSG00000171858.13	protein_coding	3462.62	-0.444621	0.0466832	-9.52421	1.66295e-21	2.70511e-20
TMEM159	ENSG00000011638.6	protein_coding	285.05	-1.54857	0.162634	-9.52181	1.70191e-21	2.76569e-20
GGT1	ENSG00000100031.14	protein_coding	146.239	2.08631	0.219241	9.51604	1.799e-21	2.9205e-20
SYNE2	ENSG00000054654.11	protein_coding	875.451	0.822739	0.0864644	9.51535	1.81101e-21	2.93703e-20
ANKRD12	ENSG00000101745.11	protein_coding	673.947	0.920554	0.0967574	9.51404	1.83393e-21	2.97119e-20
TSPAN4	ENSG00000214063.6	protein_coding	529.987	-1.07768	0.113346	-9.50786	1.94616e-21	3.14983e-20
CYTH3	ENSG00000008256.11	protein_coding	847.025	-0.843127	0.0887303	-9.50213	2.05641e-21	3.32491e-20
SPRED1	ENSG00000166068.8	protein_coding	480.805	1.07288	0.112922	9.50106	2.07764e-21	3.35584e-20
RDX	ENSG00000137710.10	protein_coding	1404.01	0.633823	0.0667713	9.49245	2.25673e-21	3.64145e-20
COPRS	ENSG00000172301.6	protein_coding	792.626	-0.861652	0.0908368	-9.48571	2.40739e-21	3.88065e-20
SON	ENSG00000159140.13	protein_coding	2653.37	0.467731	0.0493407	9.47961	2.55246e-21	4.11036e-20
MALL	ENSG00000144063.3	protein_coding	138.804	2.11168	0.222795	9.47813	2.58869e-21	4.16452e-20
TMEM106C	ENSG00000134291.7	protein_coding	328.471	-1.48102	0.15626	-9.47795	2.59331e-21	4.16777e-20
SKA2	ENSG00000182628.8	protein_coding	688.563	-0.924001	0.0974993	-9.477	2.61706e-21	4.20171e-20
RP11-861E21.2	ENSG00000267199.1	antisense	480.615	-1.1166	0.117825	-9.47674	2.62354e-21	4.2079e-20
ARID4B	ENSG00000054267.16	protein_coding	605.018	0.961466	0.101497	9.47286	2.72281e-21	4.36276e-20
WDR34	ENSG00000119333.7	protein_coding	403.236	-1.24083	0.131147	-9.46135	3.03997e-21	4.86608e-20
PTPRU	ENSG00000060656.15	protein_coding	941.652	0.794277	0.0839629	9.45985	3.08381e-21	4.93133e-20
CASC7	ENSG00000259758.1	lincRNA	1106.5	0.724123	0.0765599	9.45825	3.13142e-21	5.00247e-20
SCAF11	ENSG00000139218.13	protein_coding	811.85	0.863842	0.0913406	9.45738	3.15769e-21	5.0394e-20
CDK1	ENSG00000170312.11	protein_coding	329.922	-1.38242	0.146397	-9.44296	3.62391e-21	5.77769e-20
FGF5	ENSG00000138675.12	protein_coding	280.654	-1.59061	0.168522	-9.43854	3.77996e-21	6.02051e-20
CHMP2A	ENSG00000130724.4	protein_coding	1053.01	0.740297	0.0785856	9.42027	4.49947e-21	7.15939e-20
PSME4	ENSG00000068878.10	protein_coding	1277.79	0.658281	0.06988	9.42016	4.50397e-21	7.15943e-20
PDE4D	ENSG00000113448.12	protein_coding	293.631	1.46738	0.155835	9.41626	4.67433e-21	7.42288e-20
HS3ST1	ENSG00000002587.5	protein_coding	187.552	-1.8775	0.199457	-9.41305	4.81933e-21	7.64555e-20
LAMB2	ENSG00000172037.9	protein_coding	3733.23	0.393108	0.041766	9.41215	4.86097e-21	7.704e-20
IDH1	ENSG00000138413.9	protein_coding	1224.39	0.745437	0.0792314	9.40835	5.03971e-21	7.97938e-20
ARHGAP23	ENSG00000225485.3	protein_coding	1421.32	-0.66479	0.070683	-9.40523	5.19164e-21	8.21181e-20
RP11-800A3.4	ENSG00000260401.1	sense_overlapping	97.3724	2.53152	0.269342	9.3989	5.51359e-21	8.71245e-20
ATP6V0E2	ENSG00000171130.13	protein_coding	206.847	-1.76078	0.187391	-9.39629	5.65233e-21	8.92288e-20
RNF185	ENSG00000138942.11	protein_coding	425.009	-1.19091	0.12693	-9.38243	6.44683e-21	1.01671e-19
RP1-261G23.7	ENSG00000272114.1	antisense	301.757	1.41261	0.150757	9.37012	7.24519e-21	1.14149e-19
PLEKHA2	ENSG00000169499.10	protein_coding	251.913	1.46524	0.156435	9.36644	7.50233e-21	1.18084e-19
SEPW1	ENSG00000178980.10	protein_coding	228.89	1.58637	0.16943	9.36293	7.75532e-21	1.21947e-19
LGALS8	ENSG00000116977.14	protein_coding	2677.75	-0.465151	0.0496844	-9.36212	7.81514e-21	1.22767e-19
THOC2	ENSG00000125676.15	protein_coding	1061.92	0.731917	0.0782601	9.35237	8.57069e-21	1.34504e-19
COMT	ENSG00000093010.7	protein_coding	611.267	-0.971027	0.10392	-9.34403	9.27349e-21	1.45391e-19
AC093818.1	ENSG00000225205.1	antisense	214.283	1.58814	0.169986	9.34278	9.38388e-21	1.46977e-19
ENO1	ENSG00000074800.9	protein_coding	39522.8	-0.171639	0.0183733	-9.34174	9.47618e-21	1.48278e-19
SMARCA5	ENSG00000153147.5	protein_coding	1515.77	0.62529	0.0669361	9.34159	9.48953e-21	1.48342e-19
CDCA5	ENSG00000146670.5	protein_coding	311.261	-1.41968	0.15202	-9.33875	9.74791e-21	1.52233e-19
HABP4	ENSG00000130956.9	protein_coding	614.33	-0.965377	0.103403	-9.33603	1.00013e-20	1.56038e-19
CHD3	ENSG00000170004.12	protein_coding	1915.22	0.544684	0.0583848	9.3292	1.0667e-20	1.66261e-19
TNFSF9	ENSG00000125657.3	protein_coding	243.473	-1.57978	0.169632	-9.31302	1.2425e-20	1.93474e-19
SLFN5	ENSG00000166750.5	protein_coding	322.518	1.30995	0.140771	9.30559	1.33249e-20	2.07287e-19
MIB1	ENSG00000101752.7	protein_coding	491.218	1.04079	0.111897	9.30135	1.38678e-20	2.15523e-19
ESYT1	ENSG00000139641.8	protein_coding	1511.6	0.606364	0.0651963	9.3006	1.39658e-20	2.16835e-19
MCM3	ENSG00000112118.13	protein_coding	2107.33	-1.02867	0.110644	-9.29716	1.44246e-20	2.23742e-19
SULT1B1	ENSG00000173597.4	protein_coding	74.7546	2.9045	0.312602	9.29136	1.52323e-20	2.36041e-19
CD151	ENSG00000177697.13	protein_coding	1964.76	-0.55597	0.0598542	-9.28874	1.56126e-20	2.41701e-19
LAMB1	ENSG00000091136.9	protein_coding	256.991	1.44768	0.155917	9.28493	1.61813e-20	2.50264e-19
DSEL	ENSG00000171451.13	protein_coding	179.237	1.82775	0.196896	9.28279	1.65095e-20	2.55093e-19
M6PR	ENSG00000003056.3	protein_coding	1057.66	-0.729432	0.0786661	-9.27251	1.81816e-20	2.80659e-19
SACS	ENSG00000151835.9	protein_coding	606.969	0.939982	0.101636	9.24847	2.27728e-20	3.51192e-19
CCNB1IP1	ENSG00000100814.13	protein_coding	550.875	-1.01058	0.109281	-9.24756	2.29686e-20	3.53871e-19
EHBP1L1	ENSG00000173442.7	protein_coding	1180.76	0.706854	0.0765676	9.23176	2.66211e-20	4.0975e-19
PPM1G	ENSG00000115241.9	protein_coding	1936.65	-0.546573	0.0592131	-9.23062	2.69073e-20	4.13759e-19
PSG1	ENSG00000231924.5	protein_coding	49.2043	-4.18634	0.454068	-9.21962	2.98159e-20	4.58045e-19
SLC44A1	ENSG00000070214.11	protein_coding	479.31	1.05151	0.114116	9.21443	3.12951e-20	4.80307e-19
2004-03-01	ENSG00000144583.4	protein_coding	52.1636	-4.08962	0.444468	-9.20115	3.54138e-20	5.43e-19
ASAP3	ENSG00000088280.14	protein_coding	363.466	1.18893	0.129261	9.19791	3.64974e-20	5.5908e-19
EIF2S2	ENSG00000125977.6	protein_coding	4295.7	-0.377925	0.0410961	-9.19611	3.71141e-20	5.67983e-19
TIPARP	ENSG00000163659.8	protein_coding	653.461	0.990492	0.107712	9.19577	3.72315e-20	5.69237e-19
ADAMTS12	ENSG00000151388.6	protein_coding	1019.85	-0.772694	0.0840331	-9.19512	3.74583e-20	5.72158e-19
CD177	ENSG00000204936.5	polymorphic_pseudogene	59.3632	-3.75753	0.40881	-9.19137	3.87878e-20	5.91902e-19
KMO	ENSG00000117009.7	protein_coding	190.834	-1.80018	0.195876	-9.19044	3.91253e-20	5.96485e-19
TMEM104	ENSG00000109066.9	protein_coding	613.714	-0.954921	0.103955	-9.18591	4.08046e-20	6.21495e-19
RP11-244O19.1	ENSG00000261534.1	sense_overlapping	142.735	1.94835	0.212439	9.17137	4.67058e-20	7.10699e-19
SUPT6H	ENSG00000109111.10	protein_coding	2583.87	0.464162	0.0506201	9.16952	4.75117e-20	7.22277e-19
CREG1	ENSG00000143162.7	protein_coding	819.408	-0.828333	0.0903851	-9.16449	4.97809e-20	7.56056e-19
TMEM218	ENSG00000150433.5	protein_coding	229.568	1.54084	0.168181	9.16182	5.10294e-20	7.74284e-19
SETD2	ENSG00000181555.15	protein_coding	1114.48	0.718225	0.0784352	9.15693	5.33945e-20	8.09405e-19
AKT1	ENSG00000142208.11	protein_coding	1746.58	-0.566658	0.0618901	-9.15587	5.39198e-20	8.16595e-19
LAMP1	ENSG00000185896.9	protein_coding	2887.08	-0.462072	0.0504902	-9.15172	5.60354e-20	8.47834e-19
RPL21	ENSG00000122026.6	protein_coding	3518.93	-0.403654	0.0441161	-9.14983	5.70239e-20	8.61975e-19
ATP8B2	ENSG00000143515.12	protein_coding	360.636	-1.26912	0.138739	-9.14757	5.82311e-20	8.79394e-19
COX20	ENSG00000203667.5	protein_coding	523.91	1.00561	0.110009	9.14115	6.17912e-20	9.3228e-19
TSEN15	ENSG00000198860.7	protein_coding	692.956	-0.923763	0.10106	-9.1407	6.20468e-20	9.35255e-19
TECR	ENSG00000099797.7	protein_coding	2165.53	-0.529393	0.0579315	-9.13825	6.34687e-20	9.55789e-19
VLDLR	ENSG00000147852.11	protein_coding	559.879	0.951167	0.104094	9.13756	6.388e-20	9.61079e-19
DCAF5	ENSG00000139990.13	protein_coding	1126.52	0.678967	0.0743137	9.1365	6.45037e-20	9.69553e-19
PUF60	ENSG00000179950.9	protein_coding	1749.89	-0.5699	0.062378	-9.13623	6.46669e-20	9.71095e-19
SOAT1	ENSG00000057252.8	protein_coding	1325.86	-0.644569	0.0706721	-9.12056	7.47393e-20	1.1213e-18
DHCR7	ENSG00000172893.11	protein_coding	3351.83	-0.407182	0.0446465	-9.12015	7.50187e-20	1.12444e-18
SOS1	ENSG00000115904.8	protein_coding	754.988	0.833887	0.0914762	9.11589	7.8027e-20	1.16844e-18
MYL6	ENSG00000092841.14	protein_coding	4064.55	0.391544	0.0429822	9.10945	8.28022e-20	1.23879e-18
ATP5E	ENSG00000124172.5	protein_coding	3658.58	0.382781	0.042035	9.10625	8.52769e-20	1.27462e-18
TMEM38B	ENSG00000095209.7	protein_coding	250.188	-1.54	0.169152	-9.10426	8.68533e-20	1.29697e-18
BAZ2A	ENSG00000076108.7	protein_coding	1079.92	0.776874	0.0853912	9.09782	9.21637e-20	1.37499e-18
GLOD4	ENSG00000167699.9	protein_coding	863.946	-0.802856	0.0883221	-9.09009	9.89598e-20	1.47501e-18
RP11-661A12.7	ENSG00000254741.1	antisense	1616.32	-0.596858	0.0656649	-9.08945	9.95433e-20	1.48233e-18
SAMD9	ENSG00000205413.3	protein_coding	345.891	1.21397	0.133585	9.08761	1.01244e-19	1.50624e-18
RPRD1B	ENSG00000101413.7	protein_coding	735.218	0.961248	0.105839	9.08214	1.06456e-19	1.58232e-18
PCNXL4	ENSG00000126773.8	protein_coding	2075.06	-0.528941	0.0583352	-9.06727	1.22035e-19	1.8122e-18
ZEB1	ENSG00000148516.17	protein_coding	892.295	0.75387	0.0832344	9.05719	1.33851e-19	1.98584e-18
STK17A	ENSG00000164543.5	protein_coding	831.124	0.833347	0.0920605	9.05217	1.40154e-19	2.07741e-18
RALA	ENSG00000006451.3	protein_coding	724.649	-0.866334	0.0957492	-9.04794	1.45686e-19	2.15742e-18
NR1D2	ENSG00000174738.8	protein_coding	732.984	-0.882717	0.0975799	-9.04609	1.48175e-19	2.19226e-18
GBE1	ENSG00000114480.8	protein_coding	1737.17	0.553688	0.061241	9.04114	1.5505e-19	2.29185e-18
PIM1	ENSG00000137193.9	protein_coding	259.343	-1.50974	0.167078	-9.03611	1.62342e-19	2.39742e-18
PEF1	ENSG00000162517.8	protein_coding	818.432	-0.81011	0.0897763	-9.02365	1.81931e-19	2.68423e-18
SMG5	ENSG00000198952.7	protein_coding	1094.45	-0.695039	0.0770357	-9.0223	1.84186e-19	2.71501e-18
ANXA11	ENSG00000122359.13	protein_coding	2184.54	0.489722	0.0542849	9.02133	1.85825e-19	2.73664e-18
AGAP3	ENSG00000133612.14	protein_coding	803.091	-0.823434	0.0913159	-9.01742	1.92566e-19	2.83332e-18
CAPZB	ENSG00000077549.13	protein_coding	2691.87	0.473824	0.0525507	9.01652	1.94161e-19	2.85416e-18
ENOPH1	ENSG00000145293.10	protein_coding	563.92	-0.981981	0.108993	-9.0096	2.06811e-19	3.03734e-18
HLA-DMA	ENSG00000204257.10	protein_coding	336.573	1.27361	0.141379	9.00847	2.08942e-19	3.06582e-18
ARMC6	ENSG00000105676.9	protein_coding	479.683	-1.10985	0.123351	-8.99749	2.30947e-19	3.3856e-18
MAZ	ENSG00000103495.9	protein_coding	1084.56	-0.703024	0.0781572	-8.995	2.36236e-19	3.45997e-18
PTDSS1	ENSG00000156471.8	protein_coding	1168.68	-0.672797	0.0748885	-8.98398	2.61149e-19	3.82136e-18
CHAF1A	ENSG00000167670.11	protein_coding	399.64	-1.15659	0.128818	-8.97848	2.7454e-19	4.01364e-18
PRDX3	ENSG00000165672.5	protein_coding	1571.5	-0.62245	0.0693549	-8.97485	2.83733e-19	4.14426e-18
SETX	ENSG00000107290.9	protein_coding	997.149	0.737958	0.0822394	8.97329	2.878e-19	4.19984e-18
FADS3	ENSG00000221968.4	protein_coding	687.89	-0.925309	0.103159	-8.96977	2.97123e-19	4.33195e-18
GBP1	ENSG00000117228.9	protein_coding	281.083	1.37665	0.153601	8.96251	3.17359e-19	4.62277e-18
CLCN4	ENSG00000073464.7	protein_coding	687.398	-0.871889	0.0973529	-8.95597	3.36765e-19	4.90099e-18
MAFG	ENSG00000197063.6	protein_coding	543.192	-0.984652	0.109981	-8.95294	3.46146e-19	5.03294e-18
MSN	ENSG00000147065.12	protein_coding	15521.8	0.232682	0.0259936	8.95151	3.50648e-19	5.09378e-18
HSPB1	ENSG00000106211.8	protein_coding	1430.24	0.617513	0.0690035	8.94901	3.58687e-19	5.20584e-18
GEM	ENSG00000164949.3	protein_coding	408.514	-1.20127	0.134284	-8.94575	3.69416e-19	5.35671e-18
IFRD1	ENSG00000006652.9	protein_coding	411.947	-1.13635	0.127144	-8.93753	3.97976e-19	5.76562e-18
AKAP11	ENSG00000023516.7	protein_coding	495.347	1.00903	0.112942	8.93408	4.10589e-19	5.94297e-18
ATP6V0E1	ENSG00000113732.4	protein_coding	2030.4	-0.518698	0.0580787	-8.93094	4.22407e-19	6.1085e-18
SDC1	ENSG00000115884.6	protein_coding	607.389	-0.940775	0.105368	-8.92844	4.32056e-19	6.24242e-18
DUSP10	ENSG00000143507.13	protein_coding	364.844	-1.22767	0.137505	-8.92816	4.33149e-19	6.25257e-18
TYMS	ENSG00000176890.11	protein_coding	733.106	-0.842202	0.0944252	-8.91925	4.69466e-19	6.77071e-18
PRC1	ENSG00000198901.9	protein_coding	626.345	-0.925978	0.103872	-8.91459	4.89629e-19	7.05515e-18
JRKL	ENSG00000183340.5	protein_coding	206.902	1.54506	0.173482	8.90615	5.28333e-19	7.606e-18
INPP4B	ENSG00000109452.8	protein_coding	603.669	-0.980097	0.110079	-8.90356	5.4083e-19	7.77892e-18
PARP14	ENSG00000173193.9	protein_coding	478.914	1.00402	0.112773	8.90299	5.43621e-19	7.81205e-18
ACOX1	ENSG00000161533.7	protein_coding	480.219	1.03652	0.116544	8.89383	5.90356e-19	8.47605e-18
RUSC2	ENSG00000198853.7	protein_coding	622.157	-0.980263	0.110258	-8.89067	6.07423e-19	8.71328e-18
PVR	ENSG00000073008.10	protein_coding	1532.41	-0.589554	0.0663251	-8.88886	6.17412e-19	8.84865e-18
WDR83OS	ENSG00000105583.5	protein_coding	826.534	-0.803582	0.0904269	-8.88653	6.30448e-19	9.02741e-18
MLF1IP	ENSG00000151725.7	protein_coding	391.697	-1.15462	0.130101	-8.8748	7.00616e-19	1.00232e-17
IER2	ENSG00000160888.6	protein_coding	1144.91	-0.671871	0.0757429	-8.87041	7.28745e-19	1.04163e-17
H1FX	ENSG00000184897.4	protein_coding	363.53	-1.20532	0.135922	-8.8677	7.46711e-19	1.06636e-17
ABCC3	ENSG00000108846.11	protein_coding	172.643	1.86686	0.210535	8.86722	7.4994e-19	1.07002e-17
PAG1	ENSG00000076641.4	protein_coding	310.774	1.24718	0.140658	8.86675	7.53139e-19	1.07363e-17
JDP2	ENSG00000140044.8	protein_coding	285.21	-1.36928	0.154463	-8.86477	7.66591e-19	1.09183e-17
CDC42EP1	ENSG00000128283.6	protein_coding	812.634	-0.823861	0.0929389	-8.86455	7.68158e-19	1.09309e-17
UGP2	ENSG00000169764.10	protein_coding	1504.28	0.575236	0.0648931	8.86437	7.69369e-19	1.09384e-17
RGS7	ENSG00000182901.11	protein_coding	108.981	-2.37597	0.268064	-8.86343	7.75894e-19	1.10214e-17
NDUFS5	ENSG00000168653.6	protein_coding	1970.34	0.512304	0.0578758	8.85177	8.61413e-19	1.22254e-17
RNASEH2A	ENSG00000104889.4	protein_coding	614.944	-0.954858	0.107886	-8.85065	8.70112e-19	1.23379e-17
OAZ1	ENSG00000104904.8	protein_coding	4809.66	-0.332377	0.0376065	-8.83829	9.71989e-19	1.37703e-17
PLIN3	ENSG00000105355.4	protein_coding	1732.33	0.556665	0.0630072	8.83495	1.00145e-18	1.41752e-17
SLC35B1	ENSG00000121073.9	protein_coding	538.254	-1.01358	0.11474	-8.83369	1.01276e-18	1.43226e-17
ZNFX1	ENSG00000124201.10	protein_coding	1324.56	0.626853	0.0709667	8.83305	1.01861e-18	1.43926e-17
SF1	ENSG00000168066.16	protein_coding	2675.55	-0.453852	0.051391	-8.83135	1.03424e-18	1.46006e-17
KAT6B	ENSG00000156650.8	protein_coding	554.122	0.922406	0.104456	8.83059	1.04126e-18	1.46867e-17
TM4SF19-AS1	ENSG00000235897.1	antisense	187.546	-1.80036	0.203946	-8.82761	1.06937e-18	1.50699e-17
NTMT1	ENSG00000148335.10	protein_coding	352.153	-1.21846	0.138037	-8.8271	1.07422e-18	1.51249e-17
BAZ2B	ENSG00000123636.13	protein_coding	168.053	1.76132	0.199549	8.82648	1.08017e-18	1.51955e-17
KDM3A	ENSG00000115548.12	protein_coding	987.087	0.698184	0.0791046	8.82609	1.08403e-18	1.52363e-17
ATP6V1C2	ENSG00000143882.5	protein_coding	1607.1	-0.573435	0.0649825	-8.82444	1.10006e-18	1.54481e-17
PRPF19	ENSG00000110107.4	protein_coding	1358.65	-0.634645	0.0719259	-8.82359	1.1085e-18	1.55529e-17
STRN4	ENSG00000090372.10	protein_coding	1141.17	-0.682682	0.0774166	-8.81829	1.16217e-18	1.62917e-17
MXD4	ENSG00000123933.10	protein_coding	800.555	0.777494	0.0881873	8.81639	1.18212e-18	1.6557e-17
SIN3A	ENSG00000169375.11	protein_coding	773.065	0.783573	0.0888902	8.81507	1.19612e-18	1.67383e-17
CERS2	ENSG00000143418.15	protein_coding	2695.62	-0.435066	0.0494299	-8.80168	1.34785e-18	1.88452e-17
FUT11	ENSG00000196968.6	protein_coding	312.06	1.39696	0.158763	8.799	1.38036e-18	1.92829e-17
SERTAD4-AS1	ENSG00000203706.4	antisense	93.6085	-2.6263	0.298966	-8.78461	1.56903e-18	2.18994e-17
ILF3	ENSG00000129351.13	protein_coding	4616.23	-0.343284	0.0390895	-8.782	1.60597e-18	2.23955e-17
RP11-488P3.1	ENSG00000230439.2	sense_intronic	45.5687	3.42767	0.390616	8.77504	1.70838e-18	2.3803e-17
STK38L	ENSG00000211455.3	protein_coding	397.937	1.11365	0.127009	8.7683	1.8138e-18	2.52498e-17
ZKSCAN1	ENSG00000106261.12	protein_coding	498.449	1.03991	0.11861	8.76747	1.82724e-18	2.54149e-17
THRA	ENSG00000126351.8	protein_coding	359.782	1.27264	0.145197	8.76491	1.8692e-18	2.59759e-17
PTPRE	ENSG00000132334.12	protein_coding	253.338	1.43351	0.163855	8.74864	2.15931e-18	2.99815e-17
PHLDA2	ENSG00000181649.5	protein_coding	1760.01	0.528549	0.0604233	8.74743	2.1826e-18	3.02786e-17
ARL6IP1	ENSG00000170540.10	protein_coding	656.798	-0.888781	0.101617	-8.74638	2.20301e-18	3.05353e-17
RP11-815J21.2	ENSG00000259375.1	antisense	62.1287	2.87347	0.328753	8.74052	2.32038e-18	3.21343e-17
ARFGEF1	ENSG00000066777.4	protein_coding	543.88	0.947801	0.108444	8.73997	2.33163e-18	3.22623e-17
TPX2	ENSG00000088325.11	protein_coding	1317.73	-0.639909	0.0732279	-8.7386	2.36026e-18	3.26303e-17
BAG1	ENSG00000107262.12	protein_coding	771.72	-0.833129	0.0953556	-8.73708	2.39212e-18	3.30368e-17
RPS3	ENSG00000149273.10	protein_coding	9356.1	-0.26511	0.0303434	-8.737	2.39379e-18	3.30368e-17
RBFOX2	ENSG00000100320.18	protein_coding	1425.88	0.591862	0.0678031	8.72912	2.56659e-18	3.53911e-17
MBD3	ENSG00000071655.13	protein_coding	452.295	-1.05245	0.120641	-8.72388	2.6883e-18	3.70375e-17
PPIB	ENSG00000166794.4	protein_coding	3955.74	-0.360322	0.0413523	-8.71347	2.94702e-18	4.05671e-17
TMEM164	ENSG00000157600.7	protein_coding	608.923	0.896684	0.103022	8.70384	3.20849e-18	4.41284e-17
MSANTD3	ENSG00000066697.10	protein_coding	780.598	-0.823457	0.094663	-8.69882	3.35342e-18	4.60822e-17
EBNA1BP2	ENSG00000117395.6	protein_coding	1971.92	-0.504327	0.0580268	-8.69127	3.58397e-18	4.92082e-17
SEMA4B	ENSG00000185033.10	protein_coding	482.801	0.982265	0.113149	8.68119	3.91658e-18	5.37289e-17
AHR	ENSG00000106546.8	protein_coding	622.911	0.856045	0.0986182	8.68039	3.94404e-18	5.40593e-17
CFH	ENSG00000000971.11	protein_coding	365.998	1.12656	0.129866	8.67481	4.14223e-18	5.67274e-17
BAP1	ENSG00000163930.5	protein_coding	1135.95	-0.661528	0.0763549	-8.66386	4.56054e-18	6.24027e-17
NUDT16	ENSG00000198585.7	protein_coding	463.618	1.00005	0.115468	8.66085	4.6828e-18	6.40208e-17
WDR26	ENSG00000162923.10	protein_coding	1560.91	0.548155	0.0633361	8.65471	4.94177e-18	6.75039e-17
VEGFB	ENSG00000173511.5	protein_coding	818.963	-0.784205	0.0906275	-8.65306	5.01353e-18	6.84258e-17
WHSC1	ENSG00000109685.13	protein_coding	1197.78	-0.639161	0.0738663	-8.65295	5.01849e-18	6.84351e-17
GLRX3	ENSG00000108010.7	protein_coding	855.677	-0.772718	0.089382	-8.64512	5.37507e-18	7.32354e-17
AMD1	ENSG00000123505.10	protein_coding	859.595	-0.785042	0.0908381	-8.64221	5.51336e-18	7.50558e-17
RTN4RL2	ENSG00000186907.3	protein_coding	174.843	1.71471	0.198599	8.634	5.92408e-18	8.05786e-17
CHD4	ENSG00000111642.10	protein_coding	2191.31	0.469995	0.0544374	8.63368	5.94093e-18	8.07393e-17
FAM107B	ENSG00000065809.9	protein_coding	1682.25	-0.545429	0.0631921	-8.63129	6.06662e-18	8.23775e-17
GPI	ENSG00000105220.10	protein_coding	3147.5	0.419374	0.0486972	8.61188	7.18732e-18	9.75127e-17
FAM168A	ENSG00000054965.6	protein_coding	702.649	0.804787	0.09347	8.61011	7.29885e-18	9.8942e-17
SNHG1	ENSG00000255717.2	processed_transcript	426.394	-1.10759	0.128688	-8.6068	7.51258e-18	1.01753e-16
ZDHHC7	ENSG00000153786.8	protein_coding	2096.01	-0.485028	0.0563837	-8.60227	7.81568e-18	1.05769e-16
DNER	ENSG00000187957.7	protein_coding	174.952	1.67531	0.19488	8.59662	8.21014e-18	1.11014e-16
CALB2	ENSG00000172137.14	protein_coding	226.591	-1.52307	0.177214	-8.59452	8.36136e-18	1.12963e-16
EXOSC9	ENSG00000123737.8	protein_coding	585.514	-0.968314	0.11283	-8.58208	9.3175e-18	1.25775e-16
AGL	ENSG00000162688.11	protein_coding	416.676	1.1512	0.134159	8.58088	9.41494e-18	1.26983e-16
PBX2	ENSG00000204304.7	protein_coding	1039.61	0.682813	0.07961	8.57697	9.74089e-18	1.31269e-16
TAPBP	ENSG00000231925.7	protein_coding	3205.71	0.385109	0.0449905	8.55979	1.13078e-17	1.52256e-16
RFC2	ENSG00000049541.6	protein_coding	313.762	-1.26836	0.148377	-8.54826	1.2496e-17	1.68113e-16
PGP	ENSG00000184207.8	protein_coding	246.106	-1.46541	0.171484	-8.54544	1.2805e-17	1.72127e-16
BRWD1	ENSG00000185658.9	protein_coding	534.787	0.965059	0.112953	8.54387	1.29801e-17	1.74334e-16
RHEB	ENSG00000106615.5	protein_coding	1990.26	-0.523206	0.0612441	-8.54296	1.30829e-17	1.75567e-16
FAM129A	ENSG00000135842.12	protein_coding	835.445	-0.819194	0.0959085	-8.54141	1.32589e-17	1.7778e-16
PSMD2	ENSG00000175166.12	protein_coding	3927.11	-0.353423	0.0413998	-8.53683	1.37958e-17	1.84824e-16
CPA4	ENSG00000128510.6	protein_coding	154.296	-1.93374	0.226642	-8.53214	1.43669e-17	1.92315e-16
TRIB1	ENSG00000173334.3	protein_coding	737.915	0.818747	0.0960077	8.52793	1.48987e-17	1.99266e-16
MARS	ENSG00000166986.8	protein_coding	2048.19	-0.493839	0.0579213	-8.52603	1.51457e-17	2.02401e-16
RNF168	ENSG00000163961.4	protein_coding	511.614	0.963426	0.113019	8.52446	1.53523e-17	2.04992e-16
C10orf118	ENSG00000165813.12	protein_coding	227.971	1.41066	0.165531	8.52204	1.56768e-17	2.0915e-16
SNX22	ENSG00000157734.9	protein_coding	2347.94	-0.469533	0.0551427	-8.51488	1.66756e-17	2.22291e-16
PSD3	ENSG00000156011.12	protein_coding	548.529	0.897493	0.105506	8.50654	1.79207e-17	2.38689e-16
PNRC1	ENSG00000146278.10	protein_coding	680.377	0.847271	0.0996446	8.50293	1.84864e-17	2.4602e-16
ANLN	ENSG00000011426.6	protein_coding	766.583	-0.778592	0.0917071	-8.48999	2.06652e-17	2.74787e-16
AURKB	ENSG00000178999.8	protein_coding	219.268	-1.54473	0.181992	-8.48791	2.10381e-17	2.79514e-16
AZIN1	ENSG00000155096.9	protein_coding	1701.81	-0.540249	0.0636622	-8.48618	2.13536e-17	2.8347e-16
MELK	ENSG00000165304.3	protein_coding	503.044	-0.967959	0.114079	-8.48498	2.15765e-17	2.86192e-16
RP11-388M20.6	ENSG00000260304.1	antisense	275.971	-1.34767	0.158969	-8.4776	2.29894e-17	3.04681e-16
C6orf62	ENSG00000112308.8	protein_coding	2651.35	0.421764	0.0497657	8.475	2.35086e-17	3.11305e-16
NME7	ENSG00000143156.9	protein_coding	736.601	-0.849907	0.10032	-8.47193	2.41356e-17	3.19344e-16
C9orf69	ENSG00000238227.3	protein_coding	611.213	-0.90477	0.106827	-8.46946	2.46542e-17	3.25936e-16
BATF	ENSG00000156127.6	protein_coding	112.525	2.24078	0.264645	8.46712	2.51525e-17	3.3225e-16
CA9	ENSG00000107159.8	protein_coding	42.2528	3.37554	0.398695	8.46646	2.52961e-17	3.33871e-16
DNAH5	ENSG00000039139.9	protein_coding	103.556	2.13248	0.251891	8.46587	2.54246e-17	3.35291e-16
PRMT1	ENSG00000126457.16	protein_coding	1844.55	-0.516742	0.0610526	-8.46388	2.5862e-17	3.40779e-16
BMP4	ENSG00000125378.11	protein_coding	1102.54	-1.35607	0.160278	-8.46074	2.65675e-17	3.49787e-16
POLE3	ENSG00000148229.8	protein_coding	789.762	-0.764791	0.0904324	-8.45705	2.74234e-17	3.60759e-16
GPATCH2L	ENSG00000089916.13	protein_coding	476.977	1.01267	0.119756	8.45611	2.76448e-17	3.63374e-16
GULP1	ENSG00000144366.11	protein_coding	180.326	-1.67826	0.198501	-8.45468	2.79849e-17	3.67542e-16
ZNF160	ENSG00000170949.13	protein_coding	384.456	1.12915	0.133587	8.45251	2.85108e-17	3.74143e-16
CTC-510F12.6	ENSG00000267576.1	sense_intronic	76.8206	2.47916	0.293336	8.45162	2.87288e-17	3.76695e-16
EPRS	ENSG00000136628.13	protein_coding	2931.24	0.395615	0.0468234	8.44909	2.93581e-17	3.84631e-16
ATP6V1E1	ENSG00000131100.8	protein_coding	1520.12	-0.555723	0.0657785	-8.4484	2.95315e-17	3.86588e-16
SRFBP1	ENSG00000151304.5	protein_coding	384.299	1.09367	0.129533	8.44319	3.08786e-17	4.03892e-16
PPARD	ENSG00000112033.9	protein_coding	1007.27	-0.698203	0.0827572	-8.43676	3.26255e-17	4.26394e-16
NUMB	ENSG00000133961.15	protein_coding	1481.93	0.567041	0.0672136	8.43639	3.27279e-17	4.27383e-16
C8orf33	ENSG00000182307.8	protein_coding	1070.7	-0.666107	0.078966	-8.43537	3.30155e-17	4.30788e-16
RCAN1	ENSG00000159200.13	protein_coding	793.496	-0.761447	0.0902735	-8.43489	3.31511e-17	4.32206e-16
KLF16	ENSG00000129911.4	protein_coding	417.184	-1.12266	0.133187	-8.42923	3.47959e-17	4.53281e-16
ODC1	ENSG00000115758.8	protein_coding	1483.45	-0.566443	0.0672028	-8.42885	3.49068e-17	4.54355e-16
CCRL2	ENSG00000121797.9	protein_coding	498.376	-0.975175	0.115747	-8.42503	3.60669e-17	4.69075e-16
MBNL1	ENSG00000152601.13	protein_coding	1647.57	0.580069	0.0688689	8.4228	3.6758e-17	4.77675e-16
CLMP	ENSG00000166250.7	protein_coding	416.275	1.09284	0.129776	8.42099	3.73308e-17	4.84725e-16
PCNX	ENSG00000100731.11	protein_coding	617.16	0.878732	0.104374	8.41904	3.79582e-17	4.92473e-16
DNMT1	ENSG00000130816.10	protein_coding	2219.72	-0.471764	0.0560515	-8.41662	3.875e-17	5.02339e-16
ADTRP	ENSG00000111863.8	protein_coding	97.6394	-2.36988	0.281585	-8.41623	3.88803e-17	5.03621e-16
TPRA1	ENSG00000163870.10	protein_coding	336.649	-1.21043	0.14383	-8.41571	3.90536e-17	5.05457e-16
ANKRD11	ENSG00000167522.10	protein_coding	3344.15	0.397046	0.0471897	8.41382	3.96855e-17	5.13221e-16
C2CD2L	ENSG00000172375.8	protein_coding	257.308	-1.37554	0.163657	-8.40499	4.27883e-17	5.52901e-16
ATPIF1	ENSG00000130770.13	protein_coding	1023.19	0.675105	0.0803309	8.40406	4.31311e-17	5.56881e-16
RPL37A	ENSG00000197756.5	protein_coding	4530.57	-0.346666	0.0412824	-8.39743	4.56375e-17	5.88768e-16
NOTCH2NL	ENSG00000213240.7	protein_coding	129.501	1.97366	0.235108	8.39468	4.6716e-17	6.02196e-16
C10orf12	ENSG00000155640.5	protein_coding	162	1.66592	0.198467	8.39394	4.70111e-17	6.05514e-16
C1orf198	ENSG00000119280.12	protein_coding	479.415	-1.0583	0.126128	-8.39067	4.83377e-17	6.22101e-16
ERCC2	ENSG00000104884.10	protein_coding	699.993	-0.818416	0.0976121	-8.38437	5.09969e-17	6.55798e-16
BASP1	ENSG00000176788.7	protein_coding	2152.2	-0.49643	0.0592173	-8.38318	5.15154e-17	6.61933e-16
LFNG	ENSG00000106003.8	protein_coding	112.645	2.13722	0.25503	8.38028	5.28033e-17	6.77938e-16
SBDS	ENSG00000126524.5	protein_coding	1768.53	-0.565735	0.067515	-8.37939	5.32011e-17	6.82499e-16
EEF1B2	ENSG00000114942.9	protein_coding	3660.37	-0.361393	0.0431483	-8.37561	5.49368e-17	7.04202e-16
PATL1	ENSG00000166889.13	protein_coding	1562.88	-0.550316	0.0657278	-8.37265	5.63345e-17	7.21541e-16
NANOS1	ENSG00000188613.5	protein_coding	152.616	-1.8429	0.220123	-8.37215	5.65773e-17	7.24072e-16
PTPN13	ENSG00000163629.8	protein_coding	367.546	1.07383	0.128355	8.36608	5.95672e-17	7.61728e-16
ITGAV	ENSG00000138448.7	protein_coding	606.452	0.872113	0.104355	8.35715	6.42527e-17	8.20989e-16
ZNF644	ENSG00000122482.16	protein_coding	632.308	0.861065	0.103192	8.34429	7.16437e-17	9.14699e-16
TAOK3	ENSG00000135090.9	protein_coding	1160.44	0.61837	0.0741132	8.3436	7.20651e-17	9.19347e-16
RPL24	ENSG00000114391.8	protein_coding	5351.13	0.294881	0.0353535	8.34094	7.36994e-17	9.39447e-16
AIM2	ENSG00000163568.9	protein_coding	89.7657	2.21749	0.265894	8.33973	7.44629e-17	9.48426e-16
TRMT61A	ENSG00000166166.8	protein_coding	222.921	-1.46006	0.175109	-8.33797	7.55741e-17	9.61814e-16
AC104135.4	ENSG00000230836.1	lincRNA	94.1949	-2.4881	0.298553	-8.33387	7.82448e-17	9.95013e-16
FZD4	ENSG00000174804.3	protein_coding	566.497	-0.89583	0.107531	-8.33092	8.02197e-17	1.01932e-15
AMFR	ENSG00000159461.10	protein_coding	1221.29	-0.622092	0.0747079	-8.32699	8.29225e-17	1.05283e-15
ZNF841	ENSG00000197608.7	protein_coding	193.347	1.53409	0.184284	8.32462	8.46028e-17	1.07331e-15
DAB2	ENSG00000153071.10	protein_coding	727.889	-0.785785	0.0944184	-8.32237	8.62246e-17	1.09302e-15
SERPINE2	ENSG00000135919.8	protein_coding	1006.15	-0.66641	0.0800962	-8.32012	8.78773e-17	1.11309e-15
ZBTB7A	ENSG00000178951.4	protein_coding	814.012	0.745045	0.0895494	8.31993	8.80189e-17	1.114e-15
RP11-466H18.1	ENSG00000244398.1	pseudogene	212.247	1.50772	0.181278	8.31716	9.00959e-17	1.13939e-15
PHC1	ENSG00000111752.6	protein_coding	486.284	-0.975586	0.117325	-8.31526	9.15477e-17	1.15684e-15
KIFC1	ENSG00000237649.3	protein_coding	470.583	-0.983123	0.118364	-8.30593	9.90433e-17	1.25057e-15
BAIAP2	ENSG00000175866.11	protein_coding	803.435	0.725101	0.0873428	8.30178	1.02563e-16	1.29399e-15
LRP12	ENSG00000147650.7	protein_coding	798.574	-0.748226	0.0901378	-8.30092	1.03308e-16	1.30236e-15
RIF1	ENSG00000080345.13	protein_coding	553.652	0.897896	0.108452	8.2792	1.24003e-16	1.56203e-15
HIF1AN	ENSG00000166135.9	protein_coding	907.12	0.690163	0.0834487	8.2705	1.33401e-16	1.67909e-15
NDUFA12	ENSG00000184752.8	protein_coding	1026.49	0.664588	0.0804353	8.26239	1.42786e-16	1.7958e-15
CALCOCO2	ENSG00000136436.10	protein_coding	1452.17	0.545694	0.0660817	8.25787	1.483e-16	1.86208e-15
HNRNPK	ENSG00000165119.14	protein_coding	6977.34	0.261906	0.0317162	8.25778	1.48404e-16	1.86208e-15
RP11-849H4.4	ENSG00000251143.1	antisense	959.959	0.667356	0.0808142	8.25791	1.48243e-16	1.86208e-15
BTAF1	ENSG00000095564.9	protein_coding	403.274	1.02598	0.12429	8.25477	1.5219e-16	1.9081e-15
TMED7	ENSG00000134970.13	protein_coding	504.942	-0.968692	0.117374	-8.25305	1.54399e-16	1.93427e-15
PAPOLA	ENSG00000090060.13	protein_coding	2715.17	0.404325	0.0490032	8.25099	1.57085e-16	1.96639e-15
SLC7A6	ENSG00000103064.9	protein_coding	1064.79	-0.656729	0.0795994	-8.25043	1.57825e-16	1.97411e-15
HFE	ENSG00000010704.14	protein_coding	139.417	1.75698	0.213044	8.24704	1.6236e-16	2.02924e-15
ERC1	ENSG00000082805.15	protein_coding	544.369	0.923611	0.112022	8.24493	1.65252e-16	2.06379e-15
ATP6V0A2	ENSG00000185344.9	protein_coding	448.522	-0.991911	0.120322	-8.2438	1.66827e-16	2.08183e-15
ACTR3	ENSG00000115091.7	protein_coding	2369.25	0.429442	0.0520949	8.24344	1.67322e-16	2.08639e-15
ERO1L	ENSG00000197930.8	protein_coding	3732.52	0.359233	0.0435796	8.24315	1.67738e-16	2.08994e-15
GNA15	ENSG00000060558.3	protein_coding	511.135	0.929593	0.112804	8.24078	1.71094e-16	2.1301e-15
SPTBN1	ENSG00000115306.11	protein_coding	6499.86	0.27983	0.0339773	8.2358	1.78366e-16	2.21892e-15
UBA52	ENSG00000221983.3	protein_coding	6388.42	-0.281619	0.0342026	-8.23384	1.81303e-16	2.2537e-15
METTL7A	ENSG00000185432.10	protein_coding	83.3374	2.29108	0.278344	8.23113	1.85457e-16	2.30355e-15
TCF7L2	ENSG00000148737.11	protein_coding	419.579	1.14531	0.139153	8.23052	1.86399e-16	2.31345e-15
AC012613.2	ENSG00000253406.1	antisense	82.3039	2.34985	0.285536	8.22964	1.87779e-16	2.32878e-15
HYOU1	ENSG00000149428.14	protein_coding	3845.86	-0.341809	0.0415588	-8.22469	1.95698e-16	2.42511e-15
MRPL14	ENSG00000180992.5	protein_coding	843.622	-0.718713	0.0874616	-8.21747	2.07846e-16	2.57366e-15
MRPS10	ENSG00000048544.5	protein_coding	2028.62	-0.483443	0.058834	-8.21707	2.08537e-16	2.58022e-15
C1RL	ENSG00000139178.6	protein_coding	81.3828	2.31875	0.282192	8.2169	2.08833e-16	2.58189e-15
GGT5	ENSG00000099998.13	protein_coding	767.011	0.775627	0.0944489	8.21213	2.17294e-16	2.68443e-15
SEPHS2	ENSG00000179918.15	protein_coding	581.041	-0.887135	0.108134	-8.20406	2.32402e-16	2.86886e-15
RAPH1	ENSG00000173166.13	protein_coding	756.351	0.73631	0.0897578	8.2033	2.33876e-16	2.88483e-15
COLGALT2	ENSG00000198756.6	protein_coding	609.038	-0.845737	0.103158	-8.19848	2.43449e-16	3.0006e-15
RAB10	ENSG00000084733.6	protein_coding	1747.19	0.541482	0.066081	8.19421	2.52245e-16	3.10663e-15
SPG21	ENSG00000090487.6	protein_coding	1183.65	-0.614949	0.0751288	-8.18527	2.71685e-16	3.34348e-15
TPP1	ENSG00000166340.10	protein_coding	1871.23	-0.487546	0.0596141	-8.17837	2.87715e-16	3.53803e-15
DENND4C	ENSG00000137145.16	protein_coding	364.636	1.05076	0.128528	8.17535	2.95001e-16	3.62484e-15
TET2	ENSG00000168769.8	protein_coding	219.274	1.4071	0.172221	8.17033	3.0754e-16	3.77603e-15
KIAA1671	ENSG00000197077.8	protein_coding	447.365	0.994547	0.121757	8.16829	3.12798e-16	3.83765e-15
KCTD12	ENSG00000178695.4	protein_coding	329.688	1.10764	0.135636	8.16624	3.18158e-16	3.90041e-15
EIF3D	ENSG00000100353.13	protein_coding	2451.38	-0.442755	0.054231	-8.16426	3.23424e-16	3.96194e-15
CTPS1	ENSG00000171793.9	protein_coding	598.734	-0.866288	0.106117	-8.16348	3.25512e-16	3.98447e-15
AARS	ENSG00000090861.11	protein_coding	3577.64	-0.351712	0.0430945	-8.1614	3.31177e-16	4.05072e-15
TACC3	ENSG00000013810.14	protein_coding	326.84	-1.21559	0.149013	-8.15759	3.41776e-16	4.17717e-15
C10orf10	ENSG00000165507.8	protein_coding	245.411	1.31352	0.161031	8.15695	3.43603e-16	4.1963e-15
CLCN3	ENSG00000109572.9	protein_coding	1266.94	0.58475	0.0717889	8.14541	3.77987e-16	4.61271e-15
ICMT	ENSG00000116237.11	protein_coding	1524.45	-0.545086	0.0669607	-8.14038	3.9405e-16	4.80507e-15
DVL1	ENSG00000107404.13	protein_coding	846.392	-0.822801	0.101124	-8.13654	4.06733e-16	4.95596e-15
TRAF7	ENSG00000131653.8	protein_coding	748.675	-0.771003	0.0948829	-8.12584	4.44285e-16	5.40941e-15
JAK1	ENSG00000162434.7	protein_coding	1678.71	0.517992	0.0637548	8.12475	4.48293e-16	5.45406e-15
FAM84B	ENSG00000168672.3	protein_coding	642.661	-0.813794	0.100305	-8.11318	4.93104e-16	5.99469e-15
TUBGCP2	ENSG00000130640.9	protein_coding	1522.8	0.527164	0.0649905	8.11139	5.00421e-16	6.07903e-15
TOMM40	ENSG00000130204.8	protein_coding	811.955	-0.742801	0.0915768	-8.11124	5.01074e-16	6.08236e-15
XRN1	ENSG00000114127.6	protein_coding	232.529	1.34509	0.165854	8.11013	5.05667e-16	6.13346e-15
LARP4B	ENSG00000107929.10	protein_coding	1241.36	-0.607269	0.0749208	-8.10548	5.25379e-16	6.36774e-15
KIAA1377	ENSG00000110318.9	protein_coding	91.4005	2.22773	0.274864	8.10483	5.28177e-16	6.39681e-15
TNFAIP8L3	ENSG00000183578.5	protein_coding	52.715	2.94254	0.363065	8.10471	5.28735e-16	6.39873e-15
RP5-1120P11.1	ENSG00000237686.2	antisense	38.4088	3.30241	0.408089	8.0924	5.85016e-16	7.0745e-15
CDCA4	ENSG00000170779.10	protein_coding	347.257	-1.11707	0.138133	-8.08692	6.11949e-16	7.39462e-15
RAB11FIP5	ENSG00000135631.11	protein_coding	859.145	-0.730605	0.0903514	-8.08627	6.15206e-16	7.42837e-15
EPHB2	ENSG00000133216.12	protein_coding	560.096	-0.893671	0.110558	-8.0833	6.30383e-16	7.60589e-15
CTD-2154B17.4	ENSG00000272324.1	antisense	550.492	0.851134	0.105304	8.08266	6.33699e-16	7.64015e-15
OSBPL3	ENSG00000070882.8	protein_coding	599.658	-0.857917	0.106221	-8.07675	6.65133e-16	8.01311e-15
CASP4	ENSG00000196954.8	protein_coding	970	-0.663837	0.0822056	-8.07532	6.73003e-16	8.10182e-15
RPUSD1	ENSG00000007376.3	protein_coding	230.98	-1.43712	0.178019	-8.07283	6.86864e-16	8.26248e-15
DPAGT1	ENSG00000172269.12	protein_coding	501.044	-0.916275	0.113663	-8.06131	7.54824e-16	9.07318e-15
DCAF6	ENSG00000143164.11	protein_coding	1067.95	0.614578	0.0762593	8.05906	7.68863e-16	9.235e-15
MVP	ENSG00000013364.14	protein_coding	1149.22	0.609208	0.0755966	8.05866	7.71351e-16	9.25794e-15
KDSR	ENSG00000119537.11	protein_coding	798.839	-0.80591	0.100039	-8.05597	7.88493e-16	9.45661e-15
PPP2R1A	ENSG00000105568.13	protein_coding	2144.79	-0.453359	0.0562783	-8.05566	7.90534e-16	9.47399e-15
LEMD2	ENSG00000161904.7	protein_coding	813.561	-0.719158	0.0893487	-8.04889	8.35475e-16	1.00051e-14
FAM46C	ENSG00000183508.4	protein_coding	329.137	1.09405	0.135955	8.04713	8.47552e-16	1.01421e-14
UQCRB	ENSG00000156467.5	protein_coding	1560.1	0.53672	0.066704	8.0463	8.53362e-16	1.0204e-14
SSB	ENSG00000138385.11	protein_coding	2217.83	0.471259	0.0585801	8.04469	8.64615e-16	1.03309e-14
COL4A5	ENSG00000188153.8	protein_coding	76.6029	2.36869	0.294585	8.04079	8.92603e-16	1.06574e-14
NFIC	ENSG00000141905.13	protein_coding	1274.02	0.584542	0.0727318	8.03696	9.20951e-16	1.09876e-14
GPR68	ENSG00000119714.6	protein_coding	96.1412	2.07418	0.258146	8.0349	9.36555e-16	1.11655e-14
APC	ENSG00000134982.12	protein_coding	484.604	0.899488	0.11195	8.0347	9.38057e-16	1.11751e-14
RPS7	ENSG00000171863.8	protein_coding	7312.27	-0.256596	0.0319405	-8.03357	9.4673e-16	1.127e-14
SYNJ2	ENSG00000078269.9	protein_coding	1472.76	0.547822	0.0682294	8.02912	9.81757e-16	1.16783e-14
FAM208A	ENSG00000163946.9	protein_coding	827.887	0.715264	0.0891287	8.02507	1.0147e-15	1.20613e-14
LMBR1	ENSG00000105983.15	protein_coding	556.942	0.867537	0.108121	8.02374	1.02571e-15	1.21831e-14
C20orf112	ENSG00000197183.8	protein_coding	95.3633	2.04763	0.255236	8.02252	1.03601e-15	1.22963e-14
WDR74	ENSG00000133316.11	protein_coding	402.124	-1.06749	0.133071	-8.02195	1.04076e-15	1.23436e-14
CISD2	ENSG00000145354.5	protein_coding	504.327	-0.911092	0.113591	-8.02081	1.0505e-15	1.24498e-14
OPN3	ENSG00000054277.8	protein_coding	273.593	-1.28005	0.15968	-8.01637	1.08913e-15	1.28981e-14
OSBPL8	ENSG00000091039.12	protein_coding	1148.81	0.624848	0.0779868	8.01224	1.12641e-15	1.33297e-14
CST1	ENSG00000170373.4	protein_coding	4237.44	-1.6406	0.204947	-8.00499	1.19478e-15	1.41284e-14
NBEA	ENSG00000172915.14	protein_coding	151.306	1.61469	0.201799	8.00146	1.22948e-15	1.4528e-14
BRMS1	ENSG00000174744.9	protein_coding	497.06	-0.91494	0.11435	-8.0012	1.23216e-15	1.45489e-14
DICER1	ENSG00000100697.10	protein_coding	837.42	0.681766	0.0853006	7.9925	1.32228e-15	1.56015e-14
DMXL1	ENSG00000172869.10	protein_coding	259.446	1.22883	0.153853	7.987	1.38258e-15	1.63011e-14
TEP1	ENSG00000129566.8	protein_coding	165.218	1.5629	0.195795	7.98234	1.43583e-15	1.69164e-14
NCAPH	ENSG00000121152.5	protein_coding	272.259	-1.30562	0.163605	-7.98032	1.45955e-15	1.71833e-14
CCDC85C	ENSG00000205476.4	protein_coding	381.5	-1.042	0.130662	-7.97478	1.52657e-15	1.79591e-14
HECTD4	ENSG00000173064.6	protein_coding	613.706	0.806437	0.101154	7.97237	1.55659e-15	1.82988e-14
SETD5	ENSG00000168137.11	protein_coding	1277.81	0.561546	0.0704395	7.97203	1.56089e-15	1.83359e-14
HNRNPU-AS1	ENSG00000188206.5	antisense	465.924	0.909854	0.114563	7.94193	1.99058e-15	2.33664e-14
RCN1	ENSG00000049449.4	protein_coding	2574	-0.421245	0.0530683	-7.93779	2.05821e-15	2.41425e-14
PALLD	ENSG00000129116.13	protein_coding	1789.89	0.548588	0.0691818	7.92966	2.19753e-15	2.57578e-14
SIGMAR1	ENSG00000147955.12	protein_coding	1672.64	-0.528921	0.0667315	-7.92609	2.26147e-15	2.64879e-14
THBD	ENSG00000178726.6	protein_coding	479.763	0.897125	0.113277	7.91971	2.38063e-15	2.78632e-14
KIAA0930	ENSG00000100364.14	protein_coding	371.928	-1.07483	0.135727	-7.91905	2.39324e-15	2.79905e-14
ASCC3	ENSG00000112249.9	protein_coding	545.372	0.834028	0.105406	7.91256	2.52146e-15	2.94685e-14
BTN3A2	ENSG00000186470.9	protein_coding	412.736	0.959592	0.121296	7.91118	2.54966e-15	2.97763e-14
TMEM201	ENSG00000188807.8	protein_coding	119.407	-2.03961	0.257837	-7.91044	2.56484e-15	2.99319e-14
CNIH1	ENSG00000100528.7	protein_coding	1519.66	-0.533313	0.0674259	-7.90962	2.58172e-15	3.01069e-14
RP11-315I20.1	ENSG00000234222.2	antisense	891.545	0.658196	0.0832251	7.90862	2.60249e-15	3.0327e-14
SEC16A	ENSG00000148396.14	protein_coding	949.084	0.690006	0.0872772	7.90591	2.65976e-15	3.09719e-14
DAZAP1	ENSG00000071626.12	protein_coding	778.56	-0.727229	0.0919867	-7.90581	2.66205e-15	3.09761e-14
ZNF367	ENSG00000165244.6	protein_coding	152.884	-1.69768	0.214766	-7.90479	2.68394e-15	3.12081e-14
LUC7L3	ENSG00000108848.11	protein_coding	850.002	0.669927	0.0848187	7.89835	2.82629e-15	3.28395e-14
SORL1	ENSG00000137642.8	protein_coding	185.875	1.42454	0.180695	7.88367	3.17903e-15	3.69113e-14
NCLN	ENSG00000125912.6	protein_coding	725.446	-0.744886	0.0945226	-7.88051	3.26046e-15	3.78294e-14
ARL2	ENSG00000213465.3	protein_coding	597.353	-0.8313	0.105504	-7.87936	3.2907e-15	3.81526e-14
UBR7	ENSG00000012963.9	protein_coding	487.44	-0.957436	0.121517	-7.87905	3.29879e-15	3.82188e-14
AGFG2	ENSG00000106351.8	protein_coding	522.87	-0.894561	0.113643	-7.87165	3.50001e-15	4.05207e-14
MLEC	ENSG00000110917.3	protein_coding	3055.16	0.36353	0.0462205	7.86513	3.68728e-15	4.2658e-14
SGSH	ENSG00000181523.8	protein_coding	412.278	-0.994986	0.126513	-7.86468	3.70043e-15	4.27792e-14
ANKZF1	ENSG00000163516.9	protein_coding	259.011	1.22384	0.15562	7.86431	3.71152e-15	4.28765e-14
APH1A	ENSG00000117362.8	protein_coding	1062.72	-0.626927	0.0797375	-7.86239	3.76865e-15	4.35051e-14
SECISBP2L	ENSG00000138593.4	protein_coding	438.142	0.953544	0.121296	7.86128	3.80215e-15	4.38602e-14
IL1R1	ENSG00000115594.7	protein_coding	78.0308	2.23889	0.285076	7.85368	4.04016e-15	4.65723e-14
TRIM8	ENSG00000171206.9	protein_coding	2489.93	-0.402701	0.0513356	-7.84448	4.34736e-15	5.00775e-14
CEBPG	ENSG00000153879.4	protein_coding	709.002	-0.776798	0.0991072	-7.83796	4.57941e-15	5.27126e-14
PPP2R5C	ENSG00000078304.15	protein_coding	1362.22	0.533264	0.0681041	7.83014	4.87342e-15	5.60565e-14
ASF1B	ENSG00000105011.4	protein_coding	304.325	-1.23845	0.158396	-7.81867	5.33844e-15	6.13614e-14
RANBP9	ENSG00000010017.9	protein_coding	1678.64	-0.48731	0.0623362	-7.81744	5.39067e-15	6.19174e-14
CABLES1	ENSG00000134508.8	protein_coding	328.278	-1.15241	0.147457	-7.81526	5.48505e-15	6.29563e-14
PGF	ENSG00000119630.9	protein_coding	323.563	1.07229	0.137282	7.81084	5.68067e-15	6.51549e-14
CD81	ENSG00000110651.7	protein_coding	1675.45	-0.504728	0.0646276	-7.80979	5.72817e-15	6.56527e-14
RREB1	ENSG00000124782.15	protein_coding	570.281	0.804833	0.103117	7.80503	5.94875e-15	6.81321e-14
C12orf57	ENSG00000111678.6	protein_coding	337.184	-1.11961	0.143544	-7.79975	6.2031e-15	7.09945e-14
DPP7	ENSG00000176978.9	protein_coding	656.286	-0.789585	0.101274	-7.7965	6.3648e-15	7.27932e-14
RAB7A	ENSG00000075785.8	protein_coding	3471.79	-0.342654	0.0439756	-7.79192	6.59984e-15	7.54274e-14
YES1	ENSG00000176105.9	protein_coding	1067.92	0.606004	0.0777884	7.79041	6.67903e-15	7.62781e-14
MRPS26	ENSG00000125901.5	protein_coding	356.312	-1.08811	0.139733	-7.78706	6.85866e-15	7.82738e-14
NBEAL2	ENSG00000160796.12	protein_coding	185.515	1.63253	0.209667	7.78629	6.90063e-15	7.86967e-14
BAX	ENSG00000087088.15	protein_coding	427.394	-0.980942	0.126116	-7.77808	7.36324e-15	8.39126e-14
SLC38A2	ENSG00000134294.9	protein_coding	6361.02	-0.259521	0.0333681	-7.77751	7.39643e-15	8.4231e-14
PTPRG	ENSG00000144724.14	protein_coding	877.081	0.663994	0.0855201	7.76418	8.21725e-15	9.35121e-14
CTD-2033D15.1	ENSG00000259279.1	antisense	138.359	1.64078	0.211375	7.76239	8.33441e-15	9.47781e-14
KIAA2018	ENSG00000176542.5	protein_coding	186.822	1.40756	0.1814	7.75944	8.53039e-15	9.69379e-14
NBPF1	ENSG00000219481.6	protein_coding	522.787	-0.874726	0.11274	-7.75877	8.57589e-15	9.73859e-14
FKBP3	ENSG00000100442.6	protein_coding	1135.08	0.61239	0.0789724	7.75448	8.87054e-15	1.00661e-13
NASP	ENSG00000132780.12	protein_coding	1327.46	-0.560439	0.0722801	-7.75371	8.92492e-15	1.01206e-13
ENDOD1	ENSG00000149218.4	protein_coding	684.573	0.782387	0.100912	7.75314	8.96471e-15	1.01585e-13
FEM1A	ENSG00000141965.3	protein_coding	389.378	-1.0022	0.129291	-7.75155	9.0776e-15	1.02792e-13
RRM1	ENSG00000167325.10	protein_coding	759.188	-0.711206	0.091781	-7.74895	9.26576e-15	1.04848e-13
PAM	ENSG00000145730.16	protein_coding	2322.59	0.413077	0.0533088	7.74876	9.27979e-15	1.04933e-13
RP11-983P16.4	ENSG00000257337.2	antisense	833.363	0.662938	0.0855963	7.74494	9.56285e-15	1.08058e-13
PPP1R12A	ENSG00000058272.11	protein_coding	1299.75	0.538554	0.0695712	7.74105	9.8598e-15	1.11334e-13
VPS39	ENSG00000166887.11	protein_coding	382.677	1.00252	0.129542	7.73891	1.00271e-14	1.13144e-13
EDF1	ENSG00000107223.8	protein_coding	2843.2	0.37824	0.0489099	7.7334	1.04709e-14	1.18068e-13
ZHX1	ENSG00000165156.10	protein_coding	465.854	0.887722	0.114859	7.72878	1.08586e-14	1.22354e-13
PHTF2	ENSG00000006576.12	protein_coding	290.379	-1.16412	0.150635	-7.72811	1.09154e-14	1.22907e-13
AFF4	ENSG00000072364.8	protein_coding	1824.94	0.463047	0.0599299	7.72648	1.1056e-14	1.24403e-13
RPS4X	ENSG00000198034.6	protein_coding	19745.1	-0.167182	0.0216535	-7.7208	1.15599e-14	1.29982e-13
PERP	ENSG00000112378.11	protein_coding	1156.53	-0.598813	0.0776084	-7.71583	1.20194e-14	1.35054e-13
LRRC20	ENSG00000172731.9	protein_coding	348.545	-1.97401	0.255955	-7.71233	1.23545e-14	1.38722e-13
PDK1	ENSG00000152256.9	protein_coding	221.862	1.27353	0.165137	7.71196	1.239e-14	1.39023e-13
LRRFIP1	ENSG00000124831.14	protein_coding	1761.4	0.511628	0.0663554	7.71041	1.25414e-14	1.40623e-13
NSMF	ENSG00000165802.15	protein_coding	829.564	-0.678902	0.0881211	-7.7042	1.31669e-14	1.47534e-13
RP4-536B24.2	ENSG00000260466.1	antisense	332.166	-1.08333	0.140669	-7.70127	1.34718e-14	1.50844e-13
LPAR1	ENSG00000198121.9	protein_coding	1000.69	-0.621616	0.0807222	-7.70068	1.35342e-14	1.51438e-13
RAB37	ENSG00000172794.15	protein_coding	130.586	1.78583	0.231956	7.69899	1.37144e-14	1.53347e-13
LEPROT	ENSG00000213625.4	protein_coding	1055	-0.634415	0.0824071	-7.69854	1.37632e-14	1.53785e-13
RALGAPB	ENSG00000170471.10	protein_coding	1032.17	0.632714	0.0822023	7.69703	1.39263e-14	1.55499e-13
FBXL6	ENSG00000182325.6	protein_coding	299.218	-1.15208	0.14981	-7.69029	1.46807e-14	1.63809e-13
ZNF106	ENSG00000103994.12	protein_coding	634.745	0.751644	0.0978534	7.68133	1.57449e-14	1.75561e-13
TP53	ENSG00000141510.11	protein_coding	1039.96	-0.630977	0.0821647	-7.67942	1.59816e-14	1.78076e-13
ADORA2B	ENSG00000170425.3	protein_coding	622.137	-0.780435	0.101676	-7.67569	1.64534e-14	1.83205e-13
ABCD4	ENSG00000119688.16	protein_coding	527.1	-0.885917	0.115467	-7.67248	1.68702e-14	1.87717e-13
RGMB	ENSG00000174136.7	protein_coding	722.265	-0.767198	0.0999997	-7.672	1.6933e-14	1.88284e-13
CCNA2	ENSG00000145386.5	protein_coding	462.296	-0.977755	0.127475	-7.67018	1.71761e-14	1.90855e-13
ATP6V0A4	ENSG00000105929.11	protein_coding	79.7396	-2.34823	0.306202	-7.6689	1.73478e-14	1.92629e-13
ZFP36L1	ENSG00000185650.8	protein_coding	4353.39	0.299094	0.0390144	7.66625	1.77099e-14	1.96513e-13
MAD2L1	ENSG00000164109.9	protein_coding	289.192	-1.16799	0.152377	-7.66513	1.78652e-14	1.981e-13
PML	ENSG00000140464.15	protein_coding	528.888	0.832655	0.108733	7.65778	1.89175e-14	2.09623e-13
NCOA3	ENSG00000124151.14	protein_coding	947.92	0.656137	0.0857261	7.65388	1.94998e-14	2.15926e-13
CHPT1	ENSG00000111666.6	protein_coding	439.634	-0.932097	0.121829	-7.65088	1.99603e-14	2.20873e-13
ADRA1B	ENSG00000170214.3	protein_coding	142.996	1.62188	0.212062	7.64815	2.03889e-14	2.2546e-13
PRKCE	ENSG00000171132.9	protein_coding	283.818	-1.16141	0.151977	-7.64201	2.1385e-14	2.36311e-13
TGFB1	ENSG00000105329.5	protein_coding	2145.48	0.44395	0.0581488	7.63472	2.26317e-14	2.49916e-13
MLXIP	ENSG00000175727.9	protein_coding	1086.58	0.623399	0.0816937	7.63092	2.33079e-14	2.57206e-13
MASTL	ENSG00000120539.10	protein_coding	294.317	-1.17565	0.154179	-7.6252	2.43651e-14	2.68687e-13
IMMT	ENSG00000132305.16	protein_coding	2102.66	0.418556	0.054946	7.61759	2.58449e-14	2.8481e-13
KIF23	ENSG00000137807.9	protein_coding	287.508	-1.20291	0.158	-7.61334	2.67097e-14	2.94137e-13
FAM149B1	ENSG00000138286.10	protein_coding	523.643	-0.843745	0.110833	-7.61278	2.68256e-14	2.95211e-13
RP11-344N10.2	ENSG00000237768.2	antisense	86.2679	2.07876	0.273067	7.61262	2.68593e-14	2.95378e-13
ZWINT	ENSG00000122952.12	protein_coding	362.801	-1.07959	0.141976	-7.60409	2.86923e-14	3.1532e-13
REPIN1	ENSG00000214022.7	protein_coding	722.059	-0.717179	0.0944448	-7.59363	3.1106e-14	3.41611e-13
KAL1	ENSG00000011201.6	protein_coding	246.08	-1.25553	0.165383	-7.59161	3.15956e-14	3.4675e-13
FXR1	ENSG00000114416.13	protein_coding	2029.94	0.477169	0.0629148	7.58436	3.34133e-14	3.66449e-13
C19orf43	ENSG00000123144.6	protein_coding	1949.74	-0.444292	0.0585887	-7.58323	3.37055e-14	3.694e-13
BOD1	ENSG00000145919.6	protein_coding	769.285	-0.760541	0.100294	-7.58313	3.37304e-14	3.6942e-13
TBCA	ENSG00000171530.9	protein_coding	1612.22	0.528774	0.0697557	7.58038	3.44555e-14	3.77104e-13
PREPL	ENSG00000138078.11	protein_coding	299.388	1.11418	0.147086	7.57501	3.59101e-14	3.92756e-13
H2AFX	ENSG00000188486.3	protein_coding	429.89	-0.930906	0.123037	-7.56604	3.8477e-14	4.20544e-13
RP11-394J1.2	ENSG00000258177.1	antisense	204.05	1.30105	0.171994	7.56451	3.89343e-14	4.25252e-13
LRP6	ENSG00000070018.4	protein_coding	630.921	0.739621	0.0977829	7.56391	3.9113e-14	4.26913e-13
CSTF3	ENSG00000176102.7	protein_coding	477.458	0.909217	0.120271	7.55973	4.03911e-14	4.40563e-13
ACO1	ENSG00000122729.14	protein_coding	1343.76	0.520674	0.0688763	7.55955	4.0446e-14	4.40862e-13
AC005077.14	ENSG00000230882.1	pseudogene	97.6458	1.9025	0.251681	7.55918	4.05606e-14	4.41811e-13
PARD3B	ENSG00000116117.13	protein_coding	294.406	-1.13564	0.150245	-7.55862	4.07365e-14	4.43425e-13
C5orf42	ENSG00000197603.9	protein_coding	327.151	1.03193	0.136581	7.55546	4.17381e-14	4.54019e-13
APOBEC3F	ENSG00000128394.12	protein_coding	48.8476	2.69329	0.356474	7.55536	4.17708e-14	4.54066e-13
PFKFB2	ENSG00000123836.10	protein_coding	322.39	-1.08057	0.14313	-7.54958	4.36651e-14	4.74337e-13
PPT1	ENSG00000131238.12	protein_coding	1548.88	-0.51218	0.0678527	-7.54842	4.40566e-14	4.78265e-13
VIPR1-AS1	ENSG00000232354.3	antisense	89.1574	2.05089	0.271847	7.54426	4.54846e-14	4.93432e-13
SZT2	ENSG00000198198.9	protein_coding	653.832	-0.755997	0.100284	-7.53856	4.75187e-14	5.15151e-13
FUCA1	ENSG00000179163.11	protein_coding	690.447	0.737308	0.0978501	7.53508	4.88032e-14	5.28718e-13
MGLL	ENSG00000074416.9	protein_coding	1231.16	-1.13139	0.150216	-7.53177	5.0057e-14	5.41934e-13
TTC9	ENSG00000133985.2	protein_coding	443.298	-0.927959	0.123276	-7.52751	5.17187e-14	5.59547e-13
FZD1	ENSG00000157240.2	protein_coding	294.559	1.07576	0.143056	7.51984	5.48431e-14	5.92949e-13
RPAP2	ENSG00000122484.8	protein_coding	348.742	1.09394	0.145479	7.51961	5.49381e-14	5.93576e-13
SNX30	ENSG00000148158.12	protein_coding	536.761	-0.832329	0.11069	-7.51945	5.50066e-14	5.93839e-13
FBXO27	ENSG00000161243.4	protein_coding	152.789	-1.65571	0.220193	-7.51938	5.50366e-14	5.93839e-13
IL4R	ENSG00000077238.9	protein_coding	474.8	0.880335	0.117215	7.51043	5.89322e-14	6.35445e-13
CNTNAP1	ENSG00000108797.7	protein_coding	299.641	1.06525	0.141916	7.50621	6.08644e-14	6.55838e-13
TMEM181	ENSG00000146433.8	protein_coding	451.596	0.881115	0.117389	7.50592	6.09982e-14	6.56838e-13
F2RL1	ENSG00000164251.4	protein_coding	2450.52	0.403666	0.0537805	7.50581	6.10491e-14	6.56944e-13
CDC73	ENSG00000134371.9	protein_coding	674.813	0.720018	0.0959736	7.50225	6.27293e-14	6.74572e-13
GS1-600G8.5	ENSG00000235385.1	lincRNA	35.0815	-3.4115	0.454787	-7.50131	6.31848e-14	6.79014e-13
MCAM	ENSG00000076706.10	protein_coding	1412.45	-0.514716	0.0686454	-7.49818	6.47099e-14	6.94937e-13
TROVE2	ENSG00000116747.8	protein_coding	592.19	0.810933	0.108201	7.49469	6.64577e-14	7.1323e-13
KCTD3	ENSG00000136636.8	protein_coding	965.635	0.619673	0.0827155	7.49161	6.80321e-14	7.29637e-13
CRTAP	ENSG00000170275.10	protein_coding	2809.82	-0.375687	0.0501645	-7.48911	6.93418e-14	7.43186e-13
KLC2	ENSG00000174996.7	protein_coding	939.435	-0.624994	0.0834579	-7.48874	6.95382e-14	7.44793e-13
HKDC1	ENSG00000156510.11	protein_coding	76.3817	-2.35405	0.314513	-7.48474	7.16905e-14	7.67332e-13
DNAJB9	ENSG00000128590.4	protein_coding	424.828	-0.956931	0.127872	-7.48352	7.23596e-14	7.73977e-13
HDLBP	ENSG00000115677.12	protein_coding	5214.59	0.2866	0.0383295	7.47727	7.5882e-14	8.11112e-13
MYL9	ENSG00000101335.5	protein_coding	1446.71	0.556683	0.0744635	7.47592	7.66673e-14	8.18414e-13
BMI1	ENSG00000168283.9	protein_coding	401.36	-0.963887	0.128931	-7.476	7.66172e-14	8.18414e-13
C9orf40	ENSG00000135045.6	protein_coding	251.641	-1.23563	0.165294	-7.47539	7.6978e-14	8.21184e-13
FAM126A	ENSG00000122591.7	protein_coding	325.798	1.11884	0.149679	7.47491	7.72588e-14	8.23631e-13
MBD5	ENSG00000204406.7	protein_coding	96.5585	1.91677	0.256431	7.47479	7.73289e-14	8.2383e-13
GUF1	ENSG00000151806.9	protein_coding	643.132	0.728377	0.0974874	7.4715	7.92863e-14	8.44122e-13
ORAI1	ENSG00000182500.7	protein_coding	437.541	-0.964147	0.129066	-7.47018	8.00852e-14	8.52062e-13
MGAT4B	ENSG00000161013.12	protein_coding	1613.6	-0.479822	0.0642366	-7.46961	8.04356e-14	8.55222e-13
CXorf23	ENSG00000173681.12	protein_coding	133.65	1.59076	0.213188	7.46178	8.53611e-14	9.0699e-13
SESN3	ENSG00000149212.6	protein_coding	113.148	1.7323	0.232227	7.45951	8.68418e-14	9.22112e-13
XRCC3	ENSG00000126215.9	protein_coding	237.758	-1.32301	0.177366	-7.45925	8.7015e-14	9.23339e-13
C6orf106	ENSG00000196821.5	protein_coding	2119.19	-0.425848	0.0572379	-7.43997	1.00709e-13	1.06794e-12
MPRIP	ENSG00000133030.15	protein_coding	3003.11	0.350482	0.0471113	7.43944	1.01114e-13	1.07153e-12
LSM4	ENSG00000130520.6	protein_coding	1137.19	-0.579156	0.077877	-7.4368	1.03156e-13	1.09237e-12
LTBP3	ENSG00000168056.10	protein_coding	278.057	1.1036	0.148399	7.43672	1.03217e-13	1.09237e-12
RRAGD	ENSG00000025039.10	protein_coding	298.051	-1.11489	0.149926	-7.43631	1.03536e-13	1.09502e-12
PABPC1	ENSG00000070756.9	protein_coding	18780.8	0.163273	0.0219809	7.42796	1.10288e-13	1.16567e-12
TAF15	ENSG00000172660.7	protein_coding	1999.21	0.440198	0.0592842	7.42521	1.12598e-13	1.18929e-12
TBC1D4	ENSG00000136111.8	protein_coding	747.64	-0.69994	0.0943952	-7.415	1.21624e-13	1.28378e-12
ARF1	ENSG00000143761.9	protein_coding	5286.72	-0.271508	0.0366185	-7.4145	1.22081e-13	1.28776e-12
DDIT3	ENSG00000175197.6	protein_coding	371.735	-1.02808	0.138662	-7.41428	1.22291e-13	1.28913e-12
PNN	ENSG00000100941.4	protein_coding	826.435	0.651285	0.0878557	7.41313	1.23355e-13	1.29948e-12
TTC17	ENSG00000052841.10	protein_coding	1386.67	-0.525053	0.0708512	-7.41064	1.25688e-13	1.32319e-12
SSBP2	ENSG00000145687.11	protein_coding	141.248	1.55893	0.210445	7.40779	1.28423e-13	1.3511e-12
ZNF470	ENSG00000197016.7	protein_coding	158.938	1.44605	0.195211	7.40765	1.28556e-13	1.35161e-12
XBP1	ENSG00000100219.12	protein_coding	1002.55	-0.609449	0.0823063	-7.40465	1.31502e-13	1.38167e-12
PTEN	ENSG00000171862.5	protein_coding	980.771	0.60678	0.0819483	7.40442	1.31728e-13	1.38315e-12
ILVBL	ENSG00000105135.11	protein_coding	424.532	-0.957686	0.129371	-7.40266	1.33486e-13	1.40069e-12
PPP1CC	ENSG00000186298.7	protein_coding	2200.15	-0.406461	0.0549341	-7.39906	1.37149e-13	1.43818e-12
HLA-DPA1	ENSG00000231389.3	protein_coding	53.8873	2.50136	0.338152	7.39713	1.39158e-13	1.45829e-12
SLC39A7	ENSG00000112473.12	protein_coding	3034.08	-0.366837	0.0495984	-7.39615	1.40195e-13	1.46819e-12
EPS8	ENSG00000151491.8	protein_coding	814.354	0.685612	0.0927241	7.39411	1.42364e-13	1.48994e-12
SGK1	ENSG00000118515.7	protein_coding	206.706	-1.35831	0.183801	-7.39015	1.46668e-13	1.53398e-12
ABHD4	ENSG00000100439.6	protein_coding	1411.42	-0.501702	0.0679192	-7.38675	1.50461e-13	1.57263e-12
MLLT6	ENSG00000108292.12	protein_coding	1018.16	-0.586425	0.0794483	-7.38121	1.56852e-13	1.63836e-12
IGF2BP3	ENSG00000136231.9	protein_coding	264.69	1.11959	0.151752	7.3778	1.6093e-13	1.67986e-12
DNAJC9	ENSG00000213551.4	protein_coding	652.892	-0.733368	0.099408	-7.37736	1.61465e-13	1.68434e-12
DYNC1LI2	ENSG00000135720.8	protein_coding	1066.67	0.570464	0.0773349	7.37653	1.62468e-13	1.69371e-12
OSER1	ENSG00000132823.6	protein_coding	792.601	-0.677843	0.0919044	-7.37553	1.63693e-13	1.70537e-12
RP11-290L1.3	ENSG00000257453.1	antisense	2127.79	0.414472	0.0561975	7.37527	1.64013e-13	1.70759e-12
EPS8L2	ENSG00000177106.10	protein_coding	1240.97	-0.537478	0.0729163	-7.37117	1.69142e-13	1.75985e-12
PM20D2	ENSG00000146281.5	protein_coding	272.308	-1.16237	0.157703	-7.37063	1.69825e-13	1.76581e-12
CTD-2031P19.5	ENSG00000262211.1	antisense	419.437	0.938141	0.127377	7.36506	1.7707e-13	1.83994e-12
NIP7	ENSG00000132603.9	protein_coding	619.941	-0.808749	0.109858	-7.36176	1.81503e-13	1.88479e-12
CENPQ	ENSG00000031691.6	protein_coding	144.157	-1.60469	0.21805	-7.35929	1.84897e-13	1.91878e-12
EFNA5	ENSG00000184349.8	protein_coding	468.41	0.834174	0.113366	7.35822	1.86374e-13	1.93287e-12
CLDN7	ENSG00000181885.14	protein_coding	255.898	1.14508	0.155667	7.35597	1.89547e-13	1.96449e-12
SDC3	ENSG00000162512.11	protein_coding	1686.91	0.452864	0.0615889	7.35301	1.9379e-13	2.00717e-12
CREB3L1	ENSG00000157613.6	protein_coding	958.216	0.604633	0.0822537	7.35083	1.96983e-13	2.03892e-12
EIF3F	ENSG00000175390.8	protein_coding	2431.57	-0.389155	0.0529437	-7.35036	1.9768e-13	2.04482e-12
TIMELESS	ENSG00000111602.7	protein_coding	260.408	-1.26342	0.171891	-7.35009	1.9808e-13	2.04764e-12
QKI	ENSG00000112531.12	protein_coding	901.884	-0.695592	0.0946584	-7.34844	2.00531e-13	2.07163e-12
PLXNA2	ENSG00000076356.6	protein_coding	417.666	0.886699	0.120669	7.34822	2.00866e-13	2.07376e-12
KIAA0319L	ENSG00000142687.13	protein_coding	781.666	0.680502	0.0926208	7.34718	2.02435e-13	2.08861e-12
POC1A	ENSG00000164087.3	protein_coding	188.334	-1.40505	0.191248	-7.34678	2.0304e-13	2.09351e-12
MAT2A	ENSG00000168906.8	protein_coding	2242.95	0.402461	0.054785	7.34619	2.03939e-13	2.10143e-12
HSPA4	ENSG00000170606.9	protein_coding	3597.34	0.3121	0.0425479	7.33526	2.21298e-13	2.27883e-12
PHF14	ENSG00000106443.10	protein_coding	398.074	0.900659	0.122795	7.33467	2.22264e-13	2.2873e-12
RP11-148K1.12	ENSG00000244151.1	antisense	265.739	-1.21838	0.166129	-7.3339	2.23544e-13	2.299e-12
ANKH	ENSG00000154122.8	protein_coding	793.788	0.659345	0.0899137	7.33309	2.24911e-13	2.31157e-12
CLDN1	ENSG00000163347.5	protein_coding	38.8124	-3.14902	0.429864	-7.32562	2.37801e-13	2.44249e-12
2007-09-01	ENSG00000122545.13	protein_coding	1560.15	0.471117	0.064339	7.32242	2.43538e-13	2.49981e-12
KIF17	ENSG00000117245.8	protein_coding	31.6984	-3.41572	0.466506	-7.3219	2.44476e-13	2.50783e-12
ANKRD40	ENSG00000154945.6	protein_coding	746.146	-0.687915	0.0939692	-7.32065	2.46779e-13	2.52984e-12
CTNNAL1	ENSG00000119326.10	protein_coding	1302.85	-0.535329	0.0731376	-7.31948	2.48937e-13	2.55033e-12
BYSL	ENSG00000112578.5	protein_coding	728.49	-0.684897	0.093579	-7.31892	2.49972e-13	2.5593e-12
RHOJ	ENSG00000126785.8	protein_coding	407.437	-0.968809	0.132404	-7.31708	2.5343e-13	2.59304e-12
RGL1	ENSG00000143344.11	protein_coding	322.667	1.09389	0.149563	7.3139	2.595e-13	2.65346e-12
C12orf23	ENSG00000151135.5	protein_coding	1283.89	0.513445	0.0702666	7.3071	2.72961e-13	2.78932e-12
SRGN	ENSG00000122862.4	protein_coding	2905.67	0.354501	0.0485163	7.30684	2.73508e-13	2.79312e-12
FOXK1	ENSG00000164916.9	protein_coding	361.62	0.944938	0.129367	7.3043	2.78723e-13	2.84457e-12
SSH1	ENSG00000084112.10	protein_coding	1032.99	-0.61398	0.0840719	-7.30303	2.81362e-13	2.86968e-12
RP11-753H16.5	ENSG00000258086.1	antisense	50.329	2.56879	0.351767	7.30253	2.82403e-13	2.87847e-12
KMT2E	ENSG00000005483.15	protein_coding	743.673	0.700008	0.0959046	7.29901	2.89902e-13	2.95302e-12
KIAA1147	ENSG00000257093.2	protein_coding	326.266	1.06793	0.146438	7.29273	3.03733e-13	3.09194e-12
KIF6	ENSG00000164627.13	protein_coding	48.5624	-2.89519	0.397025	-7.29221	3.04913e-13	3.10198e-12
DSN1	ENSG00000149636.11	protein_coding	266.273	-1.14202	0.156782	-7.28408	3.23872e-13	3.29277e-12
CISD1	ENSG00000122873.7	protein_coding	432.984	-0.89177	0.122471	-7.28151	3.30106e-13	3.35402e-12
FAT3	ENSG00000165323.11	protein_coding	131.226	-1.67986	0.230749	-7.28003	3.33757e-13	3.38897e-12
SAMD4B	ENSG00000179134.10	protein_coding	1030.44	-0.574638	0.0789869	-7.2751	3.46152e-13	3.5126e-12
CHD1	ENSG00000153922.6	protein_coding	662.654	0.708531	0.0974028	7.27424	3.48384e-13	3.53301e-12
COL8A1	ENSG00000144810.11	protein_coding	1656.08	-0.456309	0.0627727	-7.26922	3.61561e-13	3.66432e-12
ADO	ENSG00000181915.3	protein_coding	301.786	-1.13907	0.156775	-7.26563	3.71304e-13	3.76068e-12
CTH	ENSG00000116761.7	protein_coding	546.858	-0.807641	0.111176	-7.26454	3.74319e-13	3.78883e-12
C5orf15	ENSG00000113583.6	protein_coding	555.104	0.76903	0.105948	7.25858	3.91184e-13	3.95703e-12
TNS3	ENSG00000136205.12	protein_coding	1216.41	0.550076	0.0758056	7.2564	3.97515e-13	4.01854e-12
RUNX1	ENSG00000159216.14	protein_coding	1234.25	0.518165	0.0714545	7.25168	4.11637e-13	4.15868e-12
STAG2	ENSG00000101972.14	protein_coding	1548.62	0.470538	0.0649416	7.24555	4.30677e-13	4.34829e-12
MFSD10	ENSG00000109736.10	protein_coding	460.126	-0.938813	0.129607	-7.24354	4.37111e-13	4.41048e-12
ZNF808	ENSG00000198482.6	protein_coding	95.2324	1.84362	0.254552	7.24258	4.40235e-13	4.4392e-12
DPF3	ENSG00000205683.7	protein_coding	186.673	-1.41827	0.195989	-7.2365	4.60425e-13	4.63987e-12
APAF1	ENSG00000120868.9	protein_coding	307.95	1.04195	0.144091	7.23125	4.78586e-13	4.81985e-12
NHP2L1	ENSG00000100138.9	protein_coding	1572.21	-0.468038	0.0647504	-7.22834	4.88928e-13	4.92091e-12
TLR2	ENSG00000137462.6	protein_coding	179.337	1.51171	0.209147	7.22797	4.90282e-13	4.93144e-12
GINS3	ENSG00000181938.9	protein_coding	137.417	-1.66824	0.230915	-7.22447	5.03072e-13	5.05691e-12
AKNA	ENSG00000106948.12	protein_coding	219.926	1.30205	0.180334	7.22021	5.19092e-13	5.21468e-12
NIPA2	ENSG00000140157.10	protein_coding	666.931	-0.728524	0.10096	-7.21594	5.35619e-13	5.37733e-12
APOBEC3G	ENSG00000239713.3	protein_coding	58.0924	2.40766	0.333733	7.21434	5.41973e-13	5.43772e-12
TMEM138	ENSG00000149483.7	protein_coding	238.778	-1.22615	0.170004	-7.21249	5.49377e-13	5.50855e-12
SERINC3	ENSG00000132824.9	protein_coding	4421.79	-0.292422	0.0405591	-7.20977	5.6045e-13	5.61606e-12
PIM3	ENSG00000198355.4	protein_coding	335.613	-1.04327	0.14476	-7.20689	5.72435e-13	5.73258e-12
LACTB	ENSG00000103642.7	protein_coding	455.112	-0.925713	0.128484	-7.20489	5.80928e-13	5.81399e-12
TSPAN31	ENSG00000135452.5	protein_coding	697.212	-0.697944	0.0969012	-7.20264	5.90573e-13	5.90684e-12
PCID2	ENSG00000126226.17	protein_coding	305.511	-1.07017	0.148608	-7.20129	5.96463e-13	5.96203e-12
SSRP1	ENSG00000149136.3	protein_coding	3084.5	-0.335682	0.0466527	-7.19533	6.231e-13	6.2244e-12
CORO2A	ENSG00000106789.8	protein_coding	213.79	1.27788	0.1777	7.19121	6.4219e-13	6.4111e-12
USP6NL	ENSG00000148429.10	protein_coding	418.599	0.871039	0.121134	7.19069	6.44649e-13	6.43164e-12
ALMS1	ENSG00000116127.13	protein_coding	356.265	0.935311	0.130076	7.19051	6.45492e-13	6.43604e-12
AP1G1	ENSG00000166747.8	protein_coding	1015.63	0.564226	0.0784719	7.19018	6.47081e-13	6.44787e-12
CPNE1	ENSG00000214078.7	protein_coding	1867.91	-0.444667	0.0618465	-7.18986	6.48569e-13	6.45868e-12
WDFY3	ENSG00000163625.11	protein_coding	918.664	0.585809	0.0814825	7.18938	6.50881e-13	6.47768e-12
ZCCHC14	ENSG00000140948.7	protein_coding	534.013	-0.807752	0.112397	-7.18658	6.64366e-13	6.60778e-12
ADCY3	ENSG00000138031.10	protein_coding	331.223	-1.05222	0.146424	-7.18613	6.66523e-13	6.62512e-12
DPM2	ENSG00000136908.13	protein_coding	637.568	-0.717697	0.09997	-7.17912	7.01596e-13	6.96914e-12
RPH3AL	ENSG00000181031.11	protein_coding	314.576	1.04896	0.146115	7.17904	7.02002e-13	6.96914e-12
TES	ENSG00000135269.13	protein_coding	852.347	-0.621263	0.0865558	-7.1776	7.09462e-13	7.03883e-12
S1PR3	ENSG00000213694.3	protein_coding	84.9374	1.91658	0.26705	7.17685	7.13335e-13	7.07288e-12
ITFG1	ENSG00000129636.8	protein_coding	538.097	0.768765	0.107139	7.1754	7.2098e-13	7.14426e-12
RBMX	ENSG00000147274.10	protein_coding	1426.61	-0.499197	0.0695951	-7.17287	7.344e-13	7.27274e-12
CDK12	ENSG00000167258.9	protein_coding	911.631	0.641691	0.0894787	7.17143	7.42176e-13	7.3452e-12
LMNA	ENSG00000160789.15	protein_coding	4782.79	0.269828	0.0376406	7.16854	7.58039e-13	7.49757e-12
PAIP2	ENSG00000120727.8	protein_coding	1301.37	0.502739	0.0701389	7.16776	7.62344e-13	7.53145e-12
SIN3B	ENSG00000127511.5	protein_coding	943.826	0.584879	0.0815997	7.16767	7.62875e-13	7.53145e-12
RP11-61L23.2	ENSG00000253882.2	pseudogene	61.6471	2.24429	0.313112	7.1677	7.62684e-13	7.53145e-12
HMGCS1	ENSG00000112972.10	protein_coding	2120.14	0.391757	0.0546617	7.16694	7.66928e-13	7.5668e-12
ANGPTL2	ENSG00000136859.5	protein_coding	197.881	-1.33918	0.186867	-7.16652	7.69293e-13	7.58547e-12
NT5E	ENSG00000135318.7	protein_coding	3877.48	-0.301003	0.0420145	-7.16427	7.82031e-13	7.70632e-12
STARD3	ENSG00000131748.11	protein_coding	367.995	-0.946438	0.132177	-7.1604	8.04395e-13	7.92183e-12
CYSTM1	ENSG00000120306.5	protein_coding	513	-0.814262	0.113772	-7.15698	8.24735e-13	8.11715e-12
ZCCHC11	ENSG00000134744.9	protein_coding	663.726	0.691198	0.0966015	7.15515	8.35841e-13	8.22142e-12
CPED1	ENSG00000106034.13	protein_coding	121.912	-1.8228	0.255097	-7.1455	8.96694e-13	8.81456e-12
EME1	ENSG00000154920.10	protein_coding	190.087	-1.34948	0.188916	-7.14326	9.11421e-13	8.95383e-12
MYO5A	ENSG00000197535.10	protein_coding	627.993	0.761468	0.106668	7.13868	9.42284e-13	9.25136e-12
TIMMDC1	ENSG00000113845.5	protein_coding	528.715	0.809093	0.113347	7.13817	9.45789e-13	9.28008e-12
MRPS2	ENSG00000122140.6	protein_coding	526.605	-0.792064	0.111039	-7.13319	9.80701e-13	9.61675e-12
ARPC3	ENSG00000111229.11	protein_coding	3693.06	0.303696	0.0425914	7.13045	1.00043e-12	9.80418e-12
MICALL1	ENSG00000100139.9	protein_coding	413.35	-0.906302	0.127168	-7.12683	1.02704e-12	1.00589e-11
GSR	ENSG00000104687.8	protein_coding	736.041	0.740208	0.103928	7.12232	1.06125e-12	1.03876e-11
PHF12	ENSG00000109118.9	protein_coding	611.983	0.776073	0.108998	7.12007	1.07874e-12	1.05523e-11
UBC	ENSG00000150991.10	protein_coding	10198.9	-0.500351	0.0702805	-7.11934	1.08447e-12	1.06019e-11
PDE1C	ENSG00000154678.12	protein_coding	224.888	-1.24127	0.174417	-7.11669	1.10547e-12	1.08006e-11
SCAMP4	ENSG00000227500.5	protein_coding	448.032	-0.873818	0.122792	-7.11623	1.1092e-12	1.08304e-11
RPLP2	ENSG00000177600.4	protein_coding	3487.75	-0.313571	0.0440737	-7.11468	1.12171e-12	1.09459e-11
SOD2	ENSG00000112096.12	protein_coding	1705.49	-0.481318	0.0676552	-7.11427	1.12505e-12	1.09718e-11
ITGA1	ENSG00000213949.4	protein_coding	362.767	0.929444	0.130655	7.11375	1.1293e-12	1.10065e-11
CCND2	ENSG00000118971.3	protein_coding	131.153	1.53804	0.216209	7.11366	1.13009e-12	1.10076e-11
FAM114A1	ENSG00000197712.7	protein_coding	885.153	0.694639	0.0976791	7.11144	1.14837e-12	1.11788e-11
BSG	ENSG00000172270.14	protein_coding	8686.3	-0.21549	0.0303076	-7.1101	1.15956e-12	1.12809e-11
RP11-498C9.13	ENSG00000263585.1	antisense	329.08	-0.995949	0.140102	-7.10873	1.17113e-12	1.13866e-11
ABL1	ENSG00000097007.13	protein_coding	976.607	0.584808	0.0822937	7.10635	1.19153e-12	1.15778e-11
SH3BGRL	ENSG00000131171.8	protein_coding	1028.34	0.564448	0.079475	7.10221	1.22778e-12	1.19229e-11
SPINK1	ENSG00000164266.6	protein_coding	48.8463	-2.72195	0.383406	-7.09941	1.25291e-12	1.21561e-11
ZMYND19	ENSG00000165724.5	protein_coding	251.218	-1.17463	0.165456	-7.09936	1.25332e-12	1.21561e-11
KDELR2	ENSG00000136240.5	protein_coding	1104.11	-0.547751	0.0772116	-7.09415	1.30152e-12	1.26117e-11
USP53	ENSG00000145390.7	protein_coding	526.308	0.791295	0.111543	7.09411	1.30186e-12	1.26117e-11
CAD	ENSG00000084774.9	protein_coding	689.159	-0.682251	0.0961911	-7.09266	1.31558e-12	1.27308e-11
WTIP	ENSG00000142279.8	protein_coding	98.4777	-1.89235	0.266808	-7.09256	1.31654e-12	1.27308e-11
RFC4	ENSG00000163918.6	protein_coding	315.306	-1.02364	0.144325	-7.09264	1.31576e-12	1.27308e-11
PRKCSH	ENSG00000130175.5	protein_coding	4344.12	-0.293005	0.0413761	-7.0815	1.426e-12	1.37809e-11
PIP5K1A	ENSG00000143398.15	protein_coding	895.349	-0.633681	0.0895269	-7.0781	1.46141e-12	1.41146e-11
PRNP	ENSG00000171867.12	protein_coding	3248.37	-0.339747	0.0480126	-7.07621	1.48148e-12	1.42999e-11
PLAUR	ENSG00000011422.7	protein_coding	1088.12	0.545173	0.0770546	7.07515	1.49291e-12	1.44015e-11
PCYOX1	ENSG00000116005.7	protein_coding	1382.72	0.54002	0.0764171	7.06674	1.58621e-12	1.52924e-11
STRA13	ENSG00000169689.10	protein_coding	173.034	-1.40376	0.198674	-7.06565	1.59863e-12	1.54028e-11
LCOR	ENSG00000196233.7	protein_coding	243.951	1.11868	0.158345	7.0648	1.60852e-12	1.54888e-11
NAV1	ENSG00000134369.11	protein_coding	790.42	0.619963	0.0877846	7.06231	1.63752e-12	1.57585e-11
RLF	ENSG00000117000.8	protein_coding	497.436	0.81129	0.114922	7.05948	1.67123e-12	1.60733e-11
FYN	ENSG00000010810.13	protein_coding	693.419	-0.720245	0.102043	-7.05823	1.68636e-12	1.62091e-11
ALG5	ENSG00000120697.4	protein_coding	360.11	-0.955145	0.135343	-7.05721	1.69885e-12	1.63193e-11
LAMB3	ENSG00000196878.8	protein_coding	4682.71	0.289595	0.0410692	7.05138	1.77153e-12	1.70073e-11
ODF2L	ENSG00000122417.11	protein_coding	346.492	0.929965	0.131898	7.05063	1.78105e-12	1.70884e-11
RBBP6	ENSG00000122257.14	protein_coding	700.397	0.656405	0.0932139	7.04192	1.89609e-12	1.81814e-11
PSMG1	ENSG00000183527.7	protein_coding	531.258	-0.801908	0.113993	-7.03474	1.99636e-12	1.91314e-11
AC078883.3	ENSG00000232788.1	antisense	75.5547	1.97814	0.281482	7.02758	2.1014e-12	2.0126e-11
ARL4C	ENSG00000188042.5	protein_coding	624.902	-1.44438	0.205625	-7.02432	2.15118e-12	2.05904e-11
SLBP	ENSG00000163950.8	protein_coding	756.033	-0.667653	0.0950664	-7.02302	2.17131e-12	2.07707e-11
SUV39H1	ENSG00000101945.12	protein_coding	164.216	-1.43089	0.203776	-7.02184	2.1896e-12	2.09331e-11
SLC25A39	ENSG00000013306.11	protein_coding	1152.61	-0.534493	0.0761516	-7.0188	2.23778e-12	2.1381e-11
NUF2	ENSG00000143228.8	protein_coding	187.768	-1.33097	0.189725	-7.01525	2.29539e-12	2.19183e-11
OSBPL5	ENSG00000021762.15	protein_coding	152.148	1.39437	0.198838	7.01259	2.33944e-12	2.23124e-11
UACA	ENSG00000137831.10	protein_coding	1224.55	0.535542	0.0763683	7.01263	2.33882e-12	2.23124e-11
GIPC1	ENSG00000123159.11	protein_coding	1658.32	-0.454006	0.0647556	-7.01107	2.3651e-12	2.25437e-11
RP11-80B9.1	ENSG00000226919.1	antisense	30.5608	-3.2301	0.460788	-7.00993	2.38435e-12	2.27137e-11
SLC2A3	ENSG00000059804.11	protein_coding	889.98	0.581389	0.0829403	7.00973	2.38784e-12	2.27334e-11
DHRS7	ENSG00000100612.9	protein_coding	268.861	1.12544	0.160641	7.0059	2.45397e-12	2.33492e-11
POLR2L	ENSG00000177700.5	protein_coding	1058.39	-0.583764	0.0833267	-7.00573	2.45703e-12	2.33644e-11
CYC1	ENSG00000179091.4	protein_coding	1374.31	-0.499046	0.0712926	-6.99997	2.56011e-12	2.43301e-11
SKAP2	ENSG00000005020.8	protein_coding	505.414	0.817839	0.116908	6.99556	2.64208e-12	2.50942e-11
CAPN12	ENSG00000182472.4	protein_coding	305.893	-1.05174	0.150445	-6.99088	2.73173e-12	2.59304e-11
OAF	ENSG00000184232.4	protein_coding	433.942	-0.8874	0.127083	-6.98285	2.8925e-12	2.74402e-11
CHD6	ENSG00000124177.10	protein_coding	582.833	0.746919	0.10698	6.98186	2.913e-12	2.76183e-11
WDR62	ENSG00000075702.12	protein_coding	130.42	-1.5885	0.227536	-6.98129	2.9249e-12	2.77148e-11
NDUFC1	ENSG00000109390.7	protein_coding	486.55	0.789908	0.113291	6.9724	3.11586e-12	2.95067e-11
DAAM1	ENSG00000100592.11	protein_coding	344.152	0.983545	0.141068	6.97213	3.12186e-12	2.95461e-11
CLTA	ENSG00000122705.12	protein_coding	2980.2	-0.346949	0.0497817	-6.96942	3.18253e-12	3.01025e-11
UBE2O	ENSG00000175931.8	protein_coding	571.494	0.733451	0.105298	6.96547	3.27305e-12	3.09404e-11
SLC38A1	ENSG00000111371.11	protein_coding	4246.84	-0.307002	0.0440851	-6.96386	3.31076e-12	3.12785e-11
SQRDL	ENSG00000137767.9	protein_coding	395.278	0.860085	0.123629	6.957	3.47606e-12	3.28208e-11
CYB5A	ENSG00000166347.14	protein_coding	435.228	-0.867675	0.124798	-6.95261	3.586e-12	3.38389e-11
LIMCH1	ENSG00000064042.13	protein_coding	1009.48	-0.575202	0.082738	-6.9521	3.59897e-12	3.39413e-11
BTBD6	ENSG00000184887.9	protein_coding	446.069	-0.840171	0.120921	-6.94811	3.70224e-12	3.48947e-11
SEH1L	ENSG00000085415.11	protein_coding	1099.16	-0.560133	0.0806239	-6.94748	3.7188e-12	3.50302e-11
KRT7	ENSG00000135480.10	protein_coding	1152.21	0.515923	0.074262	6.94734	3.72245e-12	3.5044e-11
AC012358.8	ENSG00000240401.4	antisense	65.4114	2.15143	0.309738	6.94598	3.75841e-12	3.53617e-11
ZBTB37	ENSG00000185278.10	protein_coding	79.3324	1.91267	0.27538	6.94557	3.76934e-12	3.54437e-11
HSPA8	ENSG00000109971.9	protein_coding	23095.5	-0.143515	0.0206686	-6.94362	3.8218e-12	3.59159e-11
TYRO3	ENSG00000092445.7	protein_coding	112.849	-1.76091	0.253757	-6.93933	3.93969e-12	3.70022e-11
SEC31A	ENSG00000138674.12	protein_coding	3583.77	0.296575	0.0427451	6.93822	3.97075e-12	3.7272e-11
CDCA8	ENSG00000134690.6	protein_coding	329.388	-0.996836	0.143759	-6.93409	4.08859e-12	3.83556e-11
RP11-78I14.1	ENSG00000273090.1	antisense	116.844	-1.71749	0.247713	-6.93337	4.10918e-12	3.85262e-11
DOCK4	ENSG00000128512.15	protein_coding	371.242	0.901245	0.129995	6.93295	4.12166e-12	3.86206e-11
PCBP1	ENSG00000169564.5	protein_coding	4087.75	-0.286913	0.0413965	-6.93085	4.18319e-12	3.91743e-11
ASXL2	ENSG00000143970.12	protein_coding	707.573	0.671164	0.0968569	6.92944	4.22515e-12	3.95441e-11
SMYD5	ENSG00000135632.7	protein_coding	362.138	-0.953356	0.137609	-6.92802	4.26759e-12	3.99181e-11
RASAL2	ENSG00000075391.12	protein_coding	899.191	-0.584377	0.0843561	-6.9275	4.28337e-12	4.00423e-11
ATP6V1D	ENSG00000100554.7	protein_coding	1344.53	-0.481067	0.0694519	-6.92661	4.31038e-12	4.02712e-11
SNAPC1	ENSG00000023608.4	protein_coding	566.345	-0.741984	0.10715	-6.92471	4.36854e-12	4.07909e-11
GIT1	ENSG00000108262.11	protein_coding	598.129	-0.766425	0.110692	-6.92393	4.39285e-12	4.0994e-11
HIPK3	ENSG00000110422.7	protein_coding	549.615	0.725015	0.104732	6.92256	4.43555e-12	4.13683e-11
PRKAB2	ENSG00000131791.6	protein_coding	183.375	1.26764	0.183123	6.92236	4.44194e-12	4.14038e-11
PTPRK	ENSG00000152894.10	protein_coding	773.949	-0.628221	0.0907742	-6.92069	4.4944e-12	4.18685e-11
KIAA1161	ENSG00000164976.8	protein_coding	173.218	1.30956	0.189271	6.91898	4.54899e-12	4.23524e-11
BANK1	ENSG00000153064.7	protein_coding	160.147	-1.42563	0.206185	-6.91436	4.69971e-12	4.37302e-11
AC087645.1	ENSG00000268310.1	protein_coding	200.541	-1.27172	0.183959	-6.91307	4.74262e-12	4.41039e-11
RP11-110I1.6	ENSG00000255114.1	antisense	405.233	-0.889746	0.128711	-6.91272	4.75459e-12	4.41896e-11
MALT1	ENSG00000172175.8	protein_coding	266.109	-1.19459	0.172864	-6.91056	4.82744e-12	4.48406e-11
LDLRAD3	ENSG00000179241.8	protein_coding	489.506	0.772602	0.11181	6.90992	4.8492e-12	4.50167e-11
ZNF91	ENSG00000167232.9	protein_coding	174.984	1.42627	0.206448	6.9086	4.89453e-12	4.54112e-11
MANBAL	ENSG00000101363.8	protein_coding	754.281	-0.633698	0.091773	-6.90506	5.01819e-12	4.65315e-11
PLXNA1	ENSG00000114554.7	protein_coding	1420.53	0.456778	0.066153	6.90486	5.02513e-12	4.65689e-11
G3BP1	ENSG00000145907.10	protein_coding	1816.03	-0.429231	0.0621946	-6.90141	5.14875e-12	4.7687e-11
FAIM3	ENSG00000162894.7	protein_coding	156.801	-1.43282	0.207666	-6.89967	5.21236e-12	4.82482e-11
SLC25A38	ENSG00000144659.6	protein_coding	508.006	-0.793205	0.114977	-6.89883	5.24332e-12	4.85068e-11
PLD5	ENSG00000180287.12	protein_coding	43.737	2.50128	0.363205	6.8867	5.71018e-12	5.27952e-11
TMC8	ENSG00000167895.10	protein_coding	66.3331	-2.23422	0.32456	-6.88385	5.82582e-12	5.38024e-11
OXTR	ENSG00000180914.6	protein_coding	97.2887	-1.85293	0.269171	-6.88385	5.82571e-12	5.38024e-11
GPX1P1	ENSG00000197582.5	pseudogene	347.496	0.921724	0.133928	6.88222	5.89283e-12	5.43898e-11
CKS2	ENSG00000123975.4	protein_coding	577.015	-0.724752	0.105317	-6.88161	5.91798e-12	5.45906e-11
PPP4R1	ENSG00000154845.11	protein_coding	1281.75	-0.499665	0.0726254	-6.88003	5.9841e-12	5.51687e-11
NT5C3A	ENSG00000122643.14	protein_coding	234.974	-1.14456	0.16637	-6.87959	6.00236e-12	5.53052e-11
ADD3	ENSG00000148700.9	protein_coding	271.339	1.05072	0.152827	6.87523	6.18912e-12	5.69933e-11
RPS6	ENSG00000137154.8	protein_coding	9392.6	-0.203032	0.0295389	-6.87336	6.27072e-12	5.77115e-11
KIDINS220	ENSG00000134313.10	protein_coding	1119.44	0.509307	0.0741008	6.87316	6.27963e-12	5.77604e-11
KCNAB2	ENSG00000069424.10	protein_coding	189.999	-1.29024	0.187871	-6.86772	6.52361e-12	5.99356e-11
PRR14L	ENSG00000183530.9	protein_coding	276.692	1.0298	0.149947	6.86776	6.52173e-12	5.99356e-11
MPHOSPH8	ENSG00000196199.9	protein_coding	589.758	0.712422	0.10374	6.86741	6.53795e-12	6.0033e-11
SERPINB6	ENSG00000124570.13	protein_coding	1754.2	0.412889	0.0601688	6.86219	6.78143e-12	6.22331e-11
TLR4	ENSG00000136869.13	protein_coding	1071.59	-0.545405	0.0795488	-6.85623	7.07017e-12	6.48457e-11
RPL39	ENSG00000198918.7	protein_coding	4192.84	-0.573387	0.0836321	-6.85606	7.07856e-12	6.48854e-11
SUMO2	ENSG00000188612.7	protein_coding	2365.59	0.358302	0.0523495	6.84441	7.67926e-12	7.03515e-11
PCBP2	ENSG00000197111.11	protein_coding	741.406	-0.690213	0.100878	-6.84205	7.80693e-12	7.14803e-11
SMARCA1	ENSG00000102038.11	protein_coding	1377.06	0.481856	0.0704773	6.83703	8.08491e-12	7.39831e-11
LGR5	ENSG00000139292.8	protein_coding	27.2512	-3.21981	0.471016	-6.83588	8.15024e-12	7.45384e-11
PYGL	ENSG00000100504.12	protein_coding	1837.51	0.40085	0.0586472	6.83494	8.20392e-12	7.49866e-11
NEGR1	ENSG00000172260.9	protein_coding	123.175	-1.60662	0.235095	-6.83394	8.26128e-12	7.54677e-11
HSF1	ENSG00000185122.6	protein_coding	1493.55	-0.450291	0.0658949	-6.83348	8.28813e-12	7.56699e-11
S100A13	ENSG00000189171.9	protein_coding	476.09	0.813552	0.119101	6.83076	8.44658e-12	7.70726e-11
SOD1	ENSG00000142168.10	protein_coding	2704.64	0.336228	0.0492625	6.82522	8.77901e-12	8.00604e-11
UBE3B	ENSG00000151148.9	protein_coding	766.28	0.613132	0.0898622	6.82303	8.91405e-12	8.12456e-11
SLC41A1	ENSG00000133065.6	protein_coding	724.001	-0.658295	0.096485	-6.82277	8.9301e-12	8.13456e-11
MLKL	ENSG00000168404.8	protein_coding	261.939	1.06347	0.155966	6.8186	9.19322e-12	8.36949e-11
RP6-91H8.3	ENSG00000269927.1	lincRNA	41.0812	2.54122	0.372951	6.81381	9.50452e-12	8.64798e-11
CRKL	ENSG00000099942.8	protein_coding	819.67	0.589924	0.0865811	6.81354	9.52239e-12	8.65932e-11
EVC	ENSG00000072840.8	protein_coding	714.535	-0.651505	0.0956369	-6.81228	9.60625e-12	8.73062e-11
VDAC2	ENSG00000165637.9	protein_coding	1760.46	-0.43075	0.0632376	-6.81162	9.65082e-12	8.7635e-11
KRT8	ENSG00000170421.7	protein_coding	4007.98	0.329071	0.0483106	6.81158	9.65335e-12	8.7635e-11
RAB27A	ENSG00000069974.11	protein_coding	378.804	0.879734	0.129178	6.81027	9.74137e-12	8.83839e-11
HDAC1	ENSG00000116478.7	protein_coding	1354.21	0.471391	0.0692309	6.80897	9.82985e-12	8.91362e-11
PAFAH1B3	ENSG00000079462.3	protein_coding	378.488	-0.884592	0.129958	-6.80673	9.98387e-12	9.04817e-11
HSDL2	ENSG00000119471.10	protein_coding	634.559	0.67541	0.0993156	6.80065	1.04149e-11	9.43344e-11
SP1	ENSG00000185591.5	protein_coding	934.553	0.622688	0.0915659	6.80043	1.04304e-11	9.44219e-11
FAM65A	ENSG00000039523.13	protein_coding	2011.35	-0.390458	0.0574311	-6.79872	1.05551e-11	9.54969e-11
TIAM1	ENSG00000156299.8	protein_coding	121.616	1.6071	0.236393	6.7984	1.05784e-11	9.56533e-11
TGFB2	ENSG00000092969.7	protein_coding	1160.81	-0.50537	0.0743401	-6.79808	1.06026e-11	9.58183e-11
KIAA1429	ENSG00000164944.7	protein_coding	700.001	0.657108	0.096679	6.79681	1.06964e-11	9.6611e-11
RAB34	ENSG00000109113.13	protein_coding	800.66	-0.630987	0.0928583	-6.79516	1.08195e-11	9.76681e-11
CRYBG3	ENSG00000080200.5	protein_coding	356.152	0.879498	0.129545	6.78912	1.12818e-11	1.01784e-10
ATP11B	ENSG00000058063.11	protein_coding	863.33	0.57003	0.0839813	6.78758	1.14028e-11	1.02818e-10
ABCD3	ENSG00000117528.7	protein_coding	521.287	0.773165	0.113957	6.78471	1.16323e-11	1.04828e-10
MYO9A	ENSG00000066933.11	protein_coding	388.773	0.89008	0.131196	6.78434	1.16617e-11	1.05034e-10
FOXK2	ENSG00000141568.15	protein_coding	1412.08	-0.479866	0.0707428	-6.78324	1.17507e-11	1.05776e-10
LAMA1	ENSG00000101680.9	protein_coding	76.9261	-2.02904	0.29914	-6.7829	1.17784e-11	1.05966e-10
SERPINB1	ENSG00000021355.8	protein_coding	1304.54	0.500987	0.073875	6.78154	1.18901e-11	1.06911e-10
FUBP1	ENSG00000162613.12	protein_coding	222.574	1.1908	0.17561	6.78094	1.19393e-11	1.07293e-10
FAM13B	ENSG00000031003.6	protein_coding	364.551	-0.90842	0.133993	-6.7796	1.20506e-11	1.08233e-10
EIF4B	ENSG00000063046.13	protein_coding	4337.41	0.290205	0.0428394	6.77426	1.25041e-11	1.12243e-10
CTC-506B8.1	ENSG00000249180.1	antisense	356.124	0.898365	0.132618	6.77409	1.2519e-11	1.12313e-10
HS6ST1	ENSG00000136720.6	protein_coding	353.431	-0.910825	0.134463	-6.77379	1.25449e-11	1.12483e-10
SERPIND1	ENSG00000099937.6	protein_coding	35.2584	2.68632	0.396622	6.77299	1.26144e-11	1.13043e-10
SLC38A10	ENSG00000157637.8	protein_coding	416.135	0.814051	0.120247	6.76982	1.28942e-11	1.15486e-10
GLRX5	ENSG00000182512.4	protein_coding	642.514	-0.738735	0.109145	-6.76838	1.30234e-11	1.16578e-10
ADK	ENSG00000156110.9	protein_coding	986.889	-0.564039	0.0834064	-6.76254	1.35597e-11	1.21311e-10
PPM1H	ENSG00000111110.7	protein_coding	124.388	-1.57522	0.233095	-6.75784	1.40064e-11	1.25237e-10
PRICKLE1	ENSG00000139174.6	protein_coding	138.951	-1.53906	0.228128	-6.74646	1.51494e-11	1.35381e-10
RBM27	ENSG00000091009.6	protein_coding	501.356	0.794067	0.117733	6.74467	1.5338e-11	1.3699e-10
2009-03-01	ENSG00000139266.5	protein_coding	96.9719	-1.79476	0.266475	-6.73517	1.63737e-11	1.46159e-10
ZCCHC24	ENSG00000165424.6	protein_coding	338.42	0.896696	0.13317	6.73346	1.65674e-11	1.47806e-10
IGDCC4	ENSG00000103742.7	protein_coding	127.769	-1.59909	0.237626	-6.72944	1.70317e-11	1.51864e-10
GBA	ENSG00000177628.11	protein_coding	1306.89	-0.48247	0.0717045	-6.72858	1.71327e-11	1.52679e-10
NR2C2AP	ENSG00000184162.10	protein_coding	185.96	-1.27702	0.189874	-6.72562	1.74851e-11	1.55733e-10
TRIM59	ENSG00000213186.3	protein_coding	229.079	-1.13479	0.168835	-6.72128	1.80135e-11	1.6035e-10
CPSF1	ENSG00000071894.10	protein_coding	1052.66	-0.528576	0.0786971	-6.71658	1.86035e-11	1.6551e-10
MCMBP	ENSG00000197771.8	protein_coding	1081.66	-0.515663	0.0767892	-6.71531	1.8767e-11	1.66873e-10
TMEM55B	ENSG00000165782.6	protein_coding	362.628	-0.959005	0.142814	-6.71506	1.87993e-11	1.67066e-10
FMO5	ENSG00000131781.8	protein_coding	54.1491	2.21962	0.330559	6.71475	1.88394e-11	1.6733e-10
UNG	ENSG00000076248.6	protein_coding	754.19	-0.639249	0.0952076	-6.71427	1.89011e-11	1.67785e-10
TMEM115	ENSG00000126062.3	protein_coding	544.488	-0.72678	0.108247	-6.71407	1.89273e-11	1.67924e-10
SOCS2	ENSG00000120833.9	protein_coding	163.531	-1.35155	0.201343	-6.71266	1.91103e-11	1.69455e-10
ZC3H12C	ENSG00000149289.6	protein_coding	416.375	0.834575	0.124344	6.71182	1.92211e-11	1.70343e-10
PRRC2B	ENSG00000130723.13	protein_coding	1751.04	0.42513	0.0634039	6.70512	2.01246e-11	1.78251e-10
CYB5B	ENSG00000103018.12	protein_coding	1425.45	-0.458985	0.0684553	-6.70489	2.01559e-11	1.7843e-10
MAL2	ENSG00000147676.9	protein_coding	796.633	-0.634262	0.0946156	-6.70357	2.03384e-11	1.79946e-10
SMARCA4	ENSG00000127616.13	protein_coding	2588.08	0.335962	0.050119	6.70328	2.0379e-11	1.80106e-10
CDH11	ENSG00000140937.9	protein_coding	3413.33	-0.306593	0.0457376	-6.70329	2.03774e-11	1.80106e-10
PTDSS2	ENSG00000174915.7	protein_coding	320.612	-0.949836	0.141779	-6.6994	2.0927e-11	1.84847e-10
FAM222B	ENSG00000173065.9	protein_coding	399.486	0.891848	0.13316	6.69755	2.1195e-11	1.87111e-10
TJP2	ENSG00000119139.12	protein_coding	870.316	-0.574221	0.085755	-6.69607	2.14098e-11	1.88903e-10
WASL	ENSG00000106299.7	protein_coding	692.227	-0.643956	0.0962107	-6.69319	2.18364e-11	1.92562e-10
TINAGL1	ENSG00000142910.11	protein_coding	557.822	-0.714868	0.106832	-6.69153	2.20852e-11	1.94649e-10
RAB1B	ENSG00000174903.10	protein_coding	3279.06	0.302933	0.0452757	6.69085	2.21871e-11	1.95439e-10
SLC6A6	ENSG00000131389.12	protein_coding	1017.72	0.521871	0.0780172	6.68918	2.24427e-11	1.97582e-10
DXO	ENSG00000204348.5	protein_coding	240.671	-1.13118	0.169209	-6.68513	2.30725e-11	2.03016e-10
RUNX2	ENSG00000124813.16	protein_coding	318.683	0.983183	0.147111	6.68326	2.3369e-11	2.05512e-10
PPFIA4	ENSG00000143847.11	protein_coding	27.1574	2.93227	0.438782	6.68273	2.34524e-11	2.06132e-10
H3F3B	ENSG00000132475.4	protein_coding	3825.62	-0.279847	0.0418783	-6.6824	2.35066e-11	2.06494e-10
2015-09-01	ENSG00000183291.11	protein_coding	1710.64	-0.412176	0.0616828	-6.68219	2.35402e-11	2.06676e-10
TUG1	ENSG00000253352.4	antisense	1306.46	0.479279	0.0717788	6.67716	2.43619e-11	2.13774e-10
RQCD1	ENSG00000144580.9	protein_coding	420.981	-0.819555	0.122784	-6.67479	2.47582e-11	2.17132e-10
PBRM1	ENSG00000163939.14	protein_coding	910.7	0.589513	0.0883271	6.6742	2.48578e-11	2.17887e-10
ZNF496	ENSG00000162714.8	protein_coding	372.799	-0.886797	0.132873	-6.67403	2.48874e-11	2.18027e-10
NCOR1	ENSG00000141027.16	protein_coding	1622.56	0.422053	0.0632397	6.67386	2.49167e-11	2.18164e-10
PDK4	ENSG00000004799.7	protein_coding	51.4582	2.2499	0.337375	6.66883	2.57859e-11	2.25651e-10
HMGN3-AS1	ENSG00000270362.1	antisense	138.993	1.44174	0.216257	6.66677	2.61501e-11	2.28714e-10
TAF8	ENSG00000137413.11	protein_coding	1129.15	0.520422	0.0780773	6.66547	2.63815e-11	2.30611e-10
CD22	ENSG00000012124.10	protein_coding	121.476	-1.60253	0.240437	-6.66506	2.64551e-11	2.31129e-10
INO80D	ENSG00000114933.11	protein_coding	167.81	1.2674	0.190213	6.66306	2.68176e-11	2.34168e-10
SNHG3	ENSG00000242125.2	sense_intronic	475.832	-0.771761	0.115915	-6.65801	2.77562e-11	2.42232e-10
FBP1	ENSG00000165140.5	protein_coding	269.341	-1.04169	0.156461	-6.6578	2.77948e-11	2.42436e-10
CCNI	ENSG00000118816.5	protein_coding	3049.51	-0.31154	0.046825	-6.65328	2.86635e-11	2.49878e-10
RNF187	ENSG00000168159.9	protein_coding	1530.95	-0.452615	0.0680386	-6.65233	2.88488e-11	2.51356e-10
RPL29	ENSG00000162244.6	protein_coding	5754.42	-0.234843	0.035315	-6.64997	2.9316e-11	2.55289e-10
LPCAT1	ENSG00000153395.5	protein_coding	1397.58	0.448744	0.0674854	6.64949	2.94101e-11	2.55969e-10
RP11-395B7.7	ENSG00000260336.1	sense_overlapping	335.505	0.937813	0.141065	6.64811	2.96889e-11	2.58254e-10
FAM120B	ENSG00000112584.9	protein_coding	441.112	0.784208	0.117967	6.6477	2.97699e-11	2.58819e-10
SLC25A22	ENSG00000177542.6	protein_coding	412.449	-0.830026	0.124917	-6.64459	3.04059e-11	2.64205e-10
FAM63A	ENSG00000143409.11	protein_coding	159.467	1.30416	0.196392	6.6406	3.12399e-11	2.71305e-10
PRPF40A	ENSG00000196504.11	protein_coding	1206.46	0.50016	0.0753814	6.63505	3.24385e-11	2.81561e-10
ARHGAP29	ENSG00000137962.8	protein_coding	2692	-0.376493	0.0567882	-6.62978	3.36182e-11	2.91643e-10
PITPNC1	ENSG00000154217.10	protein_coding	380.891	0.842968	0.12723	6.62554	3.45981e-11	2.99981e-10
PRKACA	ENSG00000072062.9	protein_coding	1585.29	0.45402	0.0685492	6.62327	3.51347e-11	3.04469e-10
CHID1	ENSG00000177830.13	protein_coding	396.755	-0.852208	0.128679	-6.62276	3.52551e-11	3.05347e-10
WSB2	ENSG00000176871.4	protein_coding	1181.85	-0.489719	0.0739723	-6.62031	3.58457e-11	3.10295e-10
GTF3C2	ENSG00000115207.9	protein_coding	658.562	-0.65045	0.0982896	-6.61769	3.64851e-11	3.15659e-10
NDFIP2	ENSG00000102471.9	protein_coding	367.294	-0.881561	0.133349	-6.61092	3.8195e-11	3.30274e-10
RBM26	ENSG00000139746.11	protein_coding	392.155	0.851422	0.128799	6.61046	3.83137e-11	3.31122e-10
CTD-2195B23.3	ENSG00000269652.1	antisense	207.351	-1.19533	0.180934	-6.60644	3.93679e-11	3.4005e-10
RPL9P8	ENSG00000230903.5	pseudogene	23.1295	-3.19521	0.483732	-6.60534	3.96609e-11	3.42396e-10
TSPYL1	ENSG00000189241.6	protein_coding	722.443	0.605163	0.0916759	6.60112	4.08064e-11	3.52096e-10
RP11-367G6.3	ENSG00000272053.1	lincRNA	18.5082	3.19184	0.483907	6.59598	4.22443e-11	3.64306e-10
TTI1	ENSG00000101407.8	protein_coding	432.841	0.784105	0.118878	6.59588	4.2275e-11	3.64374e-10
HGS	ENSG00000185359.8	protein_coding	1549.83	-0.448599	0.0681106	-6.58633	4.50821e-11	3.88361e-10
SRSF1	ENSG00000136450.8	protein_coding	1527.33	-0.440995	0.0669876	-6.58323	4.60326e-11	3.96122e-10
NBAS	ENSG00000151779.8	protein_coding	400.248	0.863987	0.13124	6.58327	4.60217e-11	3.96122e-10
PDIA3	ENSG00000167004.8	protein_coding	5558.71	-0.2324	0.0353057	-6.58251	4.62579e-11	3.97848e-10
NFAT5	ENSG00000102908.16	protein_coding	784.777	0.608137	0.0924067	6.58109	4.6702e-11	4.01451e-10
HEATR5B	ENSG00000008869.7	protein_coding	278.006	0.970255	0.147457	6.5799	4.70767e-11	4.04456e-10
DIAPH2	ENSG00000147202.13	protein_coding	352.23	0.856811	0.130226	6.57941	4.72332e-11	4.05583e-10
PHLDA3	ENSG00000174307.5	protein_coding	140.525	-1.48047	0.22502	-6.57927	4.72754e-11	4.05728e-10
LINC00657	ENSG00000260032.1	lincRNA	4160.22	0.261447	0.0397453	6.57806	4.7662e-11	4.08827e-10
CSTB	ENSG00000160213.5	protein_coding	3202.78	0.295569	0.0449419	6.57669	4.81035e-11	4.12393e-10
TMEM206	ENSG00000065600.8	protein_coding	210.313	-1.24183	0.189075	-6.56792	5.1022e-11	4.37179e-10
PLEKHA6	ENSG00000143850.8	protein_coding	158.318	-1.3819	0.210409	-6.56766	5.11123e-11	4.37719e-10
CAPG	ENSG00000042493.11	protein_coding	4686.28	0.255295	0.0388794	6.56634	5.1566e-11	4.41369e-10
SLC26A2	ENSG00000155850.7	protein_coding	698.579	1.37615	0.20959	6.5659	5.17186e-11	4.42202e-10
VCPIP1	ENSG00000175073.7	protein_coding	306.09	0.919403	0.140026	6.56596	5.16994e-11	4.42202e-10
PTP4A1	ENSG00000112245.6	protein_coding	2228.13	-0.372047	0.0566789	-6.56413	5.23388e-11	4.47266e-10
RP13-638C3.4	ENSG00000261845.2	antisense	202.001	-1.18501	0.180603	-6.56143	5.3295e-11	4.55195e-10
RBM41	ENSG00000089682.12	protein_coding	173.811	1.26875	0.193383	6.56082	5.35134e-11	4.56817e-10
ITFG2	ENSG00000111203.7	protein_coding	161.87	-1.35092	0.206095	-6.55484	5.57007e-11	4.75236e-10
NXN	ENSG00000167693.12	protein_coding	612.651	-0.69572	0.106144	-6.5545	5.58296e-11	4.76082e-10
CENPF	ENSG00000117724.8	protein_coding	1520.08	-0.453058	0.0691307	-6.55364	5.61506e-11	4.78564e-10
ZFAND5	ENSG00000107372.8	protein_coding	1835.15	-0.396751	0.0605579	-6.55161	5.69209e-11	4.84872e-10
PJA2	ENSG00000198961.5	protein_coding	1586.74	0.428106	0.0653662	6.54936	5.77854e-11	4.91974e-10
RAB3IP	ENSG00000127328.17	protein_coding	186.068	-1.22985	0.187787	-6.5492	5.78477e-11	4.92243e-10
LGALSL	ENSG00000119862.8	protein_coding	304.139	0.939669	0.143486	6.54885	5.79833e-11	4.93135e-10
P2RY2	ENSG00000175591.7	protein_coding	138.535	1.40943	0.215271	6.54727	5.85987e-11	4.98105e-10
RAB17	ENSG00000124839.8	protein_coding	34.2041	-2.85926	0.436788	-6.54611	5.90544e-11	5.01712e-10
TNPO1	ENSG00000083312.13	protein_coding	2004.68	0.388902	0.059422	6.54476	5.95926e-11	5.06016e-10
ABI2	ENSG00000138443.11	protein_coding	964.358	0.528516	0.0807732	6.54321	6.02132e-11	5.11015e-10
EGR3	ENSG00000179388.8	protein_coding	18.4421	3.17361	0.485045	6.54292	6.03283e-11	5.1172e-10
PIKFYVE	ENSG00000115020.12	protein_coding	452.387	0.773173	0.118171	6.54282	6.03692e-11	5.11797e-10
SYNPR-AS1	ENSG00000241359.1	antisense	35.055	-2.83481	0.433329	-6.54193	6.07281e-11	5.14567e-10
ABCB9	ENSG00000150967.13	protein_coding	475.489	-0.760616	0.116297	-6.54027	6.14098e-11	5.20068e-10
DNMBP-AS1	ENSG00000227695.1	antisense	162.764	1.26101	0.192834	6.53937	6.1778e-11	5.2291e-10
MICAL1	ENSG00000135596.13	protein_coding	132.42	1.43391	0.21934	6.53739	6.26025e-11	5.2961e-10
ETS2	ENSG00000157557.7	protein_coding	535.767	-0.761679	0.116536	-6.53598	6.3195e-11	5.3434e-10
PANX1	ENSG00000110218.4	protein_coding	486.984	0.743897	0.113822	6.53559	6.33586e-11	5.3544e-10
FAT4	ENSG00000196159.7	protein_coding	411.677	0.903232	0.138206	6.53542	6.34314e-11	5.35773e-10
MDN1	ENSG00000112159.7	protein_coding	480.046	0.741589	0.1135	6.5338	6.41217e-11	5.41318e-10
ELOVL1	ENSG00000066322.8	protein_coding	1471.25	-0.432367	0.0661887	-6.53235	6.47468e-11	5.46308e-10
FSIP2	ENSG00000188738.9	protein_coding	37.8762	2.64498	0.405099	6.52923	6.61078e-11	5.57497e-10
SBDSP1	ENSG00000225648.1	pseudogene	353.484	-0.875876	0.134218	-6.52579	6.76442e-11	5.70154e-10
AP1S2	ENSG00000182287.9	protein_coding	690.703	-0.626458	0.0960227	-6.52406	6.84296e-11	5.76471e-10
SUV420H1	ENSG00000110066.10	protein_coding	378.586	0.865673	0.132809	6.51816	7.11754e-11	5.99287e-10
VPS18	ENSG00000104142.6	protein_coding	326.404	-0.95805	0.146993	-6.51765	7.1417e-11	6.01006e-10
C4orf46	ENSG00000205208.4	protein_coding	137.688	-1.51794	0.233074	-6.51268	7.38208e-11	6.20908e-10
UBN1	ENSG00000118900.10	protein_coding	547.928	0.695741	0.106905	6.50802	7.61459e-11	6.40129e-10
EDN2	ENSG00000127129.5	protein_coding	20.0831	3.12164	0.479765	6.50661	7.68676e-11	6.45857e-10
POGK	ENSG00000143157.7	protein_coding	746.002	-0.630729	0.0969414	-6.50629	7.70274e-11	6.46861e-10
KIAA0754	ENSG00000255103.1	protein_coding	323.681	0.923112	0.141941	6.50347	7.8489e-11	6.58789e-10
RPS13	ENSG00000110700.2	protein_coding	3375.93	-0.28996	0.0446118	-6.49961	8.05272e-11	6.75543e-10
KIAA1143	ENSG00000163807.4	protein_coding	483.339	0.72922	0.112198	6.49938	8.06531e-11	6.76245e-10
SLC43A2	ENSG00000167703.10	protein_coding	40.2574	2.43876	0.37534	6.49747	8.16837e-11	6.84528e-10
RHOQ	ENSG00000119729.6	protein_coding	587.712	-0.701181	0.107929	-6.49668	8.21143e-11	6.87777e-10
FTSJ1	ENSG00000068438.10	protein_coding	974.512	-0.540216	0.0831598	-6.49612	8.24169e-11	6.89951e-10
SLC25A37	ENSG00000147454.9	protein_coding	595.601	0.656009	0.101079	6.49005	8.58101e-11	7.17982e-10
CLIP2	ENSG00000106665.11	protein_coding	530.411	-0.779965	0.120215	-6.48809	8.69302e-11	7.26974e-10
FLT1	ENSG00000102755.6	protein_coding	35.3557	-2.76065	0.425601	-6.48649	8.78614e-11	7.34379e-10
AFAP1-AS1	ENSG00000272620.1	antisense	659.15	0.655612	0.101097	6.485	8.8733e-11	7.41277e-10
RNF126	ENSG00000070423.13	protein_coding	438.998	-0.807884	0.124613	-6.48312	8.98452e-11	7.50177e-10
EFHD2	ENSG00000142634.8	protein_coding	1431.41	0.428913	0.0661669	6.48229	9.03395e-11	7.53911e-10
CTD-2616J11.9	ENSG00000267984.1	antisense	162.44	1.31973	0.203693	6.47898	9.23417e-11	7.70219e-10
LINC00704	ENSG00000231298.2	lincRNA	148.407	-1.36854	0.211248	-6.47838	9.27102e-11	7.7289e-10
CLIC6	ENSG00000159212.8	protein_coding	582.697	-0.763937	0.117931	-6.47781	9.30629e-11	7.75428e-10
DPYSL2	ENSG00000092964.12	protein_coding	1538.65	0.41335	0.0638222	6.47659	9.38205e-11	7.81334e-10
CHAF1B	ENSG00000159259.7	protein_coding	199.334	-1.20375	0.185865	-6.47645	9.39083e-11	7.81658e-10
CAP2	ENSG00000112186.7	protein_coding	546.83	-0.712386	0.110102	-6.47026	9.78356e-11	8.13925e-10
ARHGAP11A	ENSG00000198826.6	protein_coding	287.857	-0.966449	0.149436	-6.46732	9.97534e-11	8.2945e-10
PTTG1	ENSG00000164611.8	protein_coding	518.976	-0.733841	0.113494	-6.46593	1.00678e-10	8.36705e-10
MRTO4	ENSG00000053372.4	protein_coding	602.973	-0.677433	0.104776	-6.46557	1.00918e-10	8.37828e-10
AC015971.2	ENSG00000228363.2	antisense	451.242	0.775034	0.11987	6.46561	1.0089e-10	8.37828e-10
MICA	ENSG00000204520.8	protein_coding	1077.1	-0.501525	0.0775898	-6.4638	1.02108e-10	8.47267e-10
PBK	ENSG00000168078.5	protein_coding	194.719	-1.21932	0.188712	-6.46128	1.03821e-10	8.61034e-10
FUT8	ENSG00000033170.12	protein_coding	2426.05	0.33275	0.0515166	6.45909	1.05335e-10	8.73142e-10
PRCP	ENSG00000137509.6	protein_coding	1342.04	-0.450304	0.0697745	-6.4537	1.09149e-10	9.04285e-10
POLD1	ENSG00000062822.8	protein_coding	146.48	-1.39716	0.21659	-6.45071	1.11328e-10	9.21863e-10
KANK1	ENSG00000107104.14	protein_coding	217.829	-1.18255	0.183425	-6.44705	1.14051e-10	9.43928e-10
HLA-B	ENSG00000234745.5	protein_coding	1806.95	-0.399969	0.0620505	-6.44586	1.14945e-10	9.50832e-10
OSBP	ENSG00000110048.7	protein_coding	1328.97	0.45854	0.0711525	6.44447	1.16002e-10	9.59082e-10
JOSD1	ENSG00000100221.6	protein_coding	983.86	-0.521453	0.0809176	-6.44424	1.1618e-10	9.6006e-10
ATP6V0E2-AS1	ENSG00000204934.6	antisense	81.4743	-1.86075	0.288873	-6.44142	1.18365e-10	9.77606e-10
FANCE	ENSG00000112039.3	protein_coding	306.574	-0.928503	0.144292	-6.4349	1.23554e-10	1.01994e-09
ARID5B	ENSG00000150347.10	protein_coding	334.207	0.890444	0.138401	6.43382	1.24434e-10	1.02668e-09
CDK2AP1	ENSG00000111328.2	protein_coding	523.42	-0.71258	0.110779	-6.43243	1.25583e-10	1.03562e-09
MORF4L1	ENSG00000185787.10	protein_coding	3005.92	0.309201	0.0480826	6.43063	1.27079e-10	1.04742e-09
DAGLB	ENSG00000164535.10	protein_coding	255.124	-1.05529	0.164137	-6.42934	1.28161e-10	1.05579e-09
ELOVL6	ENSG00000170522.5	protein_coding	1241.25	0.465179	0.0724101	6.42423	1.32538e-10	1.0913e-09
TBC1D8B	ENSG00000133138.15	protein_coding	179.943	1.28243	0.19965	6.42341	1.33259e-10	1.09667e-09
SERP1	ENSG00000120742.6	protein_coding	1068.27	-0.503748	0.0784728	-6.4194	1.36814e-10	1.12534e-09
STARD10	ENSG00000214530.3	protein_coding	242.769	-1.10657	0.172469	-6.41609	1.39818e-10	1.14947e-09
SUMO3	ENSG00000184900.11	protein_coding	1927.85	-0.392023	0.0611661	-6.40916	1.46324e-10	1.20233e-09
UBA6	ENSG00000033178.8	protein_coding	638.787	0.634858	0.0990753	6.40784	1.47596e-10	1.21216e-09
VAMP8	ENSG00000118640.6	protein_coding	1094.39	0.480173	0.0749578	6.40591	1.49476e-10	1.22698e-09
SYVN1	ENSG00000162298.12	protein_coding	1086.9	-0.501795	0.0783899	-6.40128	1.54083e-10	1.26415e-09
KLHDC3	ENSG00000124702.13	protein_coding	1884.11	-0.389897	0.0609323	-6.39885	1.5655e-10	1.28373e-09
RHOBTB3	ENSG00000164292.8	protein_coding	1021.61	-0.512762	0.0801599	-6.39674	1.58731e-10	1.30095e-09
ERAL1	ENSG00000132591.7	protein_coding	522.647	-0.713762	0.11167	-6.39174	1.64013e-10	1.34355e-09
SET	ENSG00000119335.12	protein_coding	5504.97	-0.458045	0.0716707	-6.39097	1.6484e-10	1.34963e-09
RBM24	ENSG00000112183.10	protein_coding	62.4644	-2.10634	0.32963	-6.39001	1.65874e-10	1.35741e-09
FOXO3	ENSG00000118689.10	protein_coding	622.036	0.632591	0.0990105	6.38914	1.66826e-10	1.3645e-09
MCUR1	ENSG00000050393.7	protein_coding	993.206	-0.511456	0.0800641	-6.38808	1.67978e-10	1.37322e-09
RIC8A	ENSG00000177963.8	protein_coding	1341.25	-0.441472	0.0691205	-6.38699	1.69185e-10	1.38238e-09
CHD7	ENSG00000171316.7	protein_coding	123.447	1.50163	0.235217	6.38403	1.72491e-10	1.40867e-09
SERPINB9	ENSG00000170542.5	protein_coding	191.762	1.15208	0.180567	6.38031	1.76726e-10	1.44252e-09
SMARCC1	ENSG00000173473.6	protein_coding	1419.28	0.441685	0.0692503	6.37809	1.79312e-10	1.46289e-09
C20orf27	ENSG00000101220.13	protein_coding	319.198	-0.920822	0.144403	-6.37676	1.80874e-10	1.47488e-09
PKN2	ENSG00000065243.14	protein_coding	542.115	0.670522	0.105272	6.36941	1.89755e-10	1.54651e-09
RP5-956O18.3	ENSG00000224407.1	antisense	272.585	0.977743	0.153533	6.3683	1.91134e-10	1.55696e-09
ESCO1	ENSG00000141446.6	protein_coding	696.001	0.596941	0.0937502	6.36736	1.92312e-10	1.56576e-09
TCEA3	ENSG00000204219.5	protein_coding	263.819	0.971249	0.152622	6.36373	1.96906e-10	1.60235e-09
ANK1	ENSG00000029534.15	protein_coding	220.593	-1.16879	0.183687	-6.36293	1.97936e-10	1.60991e-09
TMEM192	ENSG00000170088.9	protein_coding	564.445	-0.677802	0.106588	-6.3591	2.02942e-10	1.64979e-09
P2RY6	ENSG00000171631.10	protein_coding	22.9949	2.93384	0.461372	6.35894	2.03148e-10	1.65063e-09
YRDC	ENSG00000196449.3	protein_coding	304.239	-0.934529	0.147043	-6.35547	2.07786e-10	1.68746e-09
PEMT	ENSG00000133027.13	protein_coding	286.831	-0.97661	0.153668	-6.35531	2.08009e-10	1.68842e-09
MED13	ENSG00000108510.5	protein_coding	550.911	0.670411	0.105531	6.35276	2.1149e-10	1.7158e-09
REEP4	ENSG00000168476.7	protein_coding	199.625	-1.1556	0.181965	-6.35071	2.14321e-10	1.73789e-09
RRP1	ENSG00000160214.8	protein_coding	362.467	-0.839764	0.132341	-6.34546	2.21758e-10	1.79728e-09
H1F0	ENSG00000189060.4	protein_coding	2233.44	0.359562	0.0567592	6.33486	2.37549e-10	1.92429e-09
PPAP2C	ENSG00000141934.5	protein_coding	208.51	-1.11545	0.17616	-6.33205	2.41932e-10	1.95881e-09
ARPC2	ENSG00000163466.11	protein_coding	3335.53	0.279825	0.0441947	6.33164	2.42563e-10	1.96292e-09
GPCPD1	ENSG00000125772.8	protein_coding	236.852	1.01348	0.160106	6.33003	2.45115e-10	1.98257e-09
BPNT1	ENSG00000162813.13	protein_coding	475.111	0.72082	0.113893	6.32895	2.4684e-10	1.99552e-09
ERCC3	ENSG00000163161.8	protein_coding	427.585	-0.773326	0.122279	-6.32428	2.54408e-10	2.05566e-09
GPR108	ENSG00000125734.9	protein_coding	780.635	-0.583891	0.0924961	-6.31261	2.74376e-10	2.21589e-09
ANKRD50	ENSG00000151458.7	protein_coding	688.621	0.667328	0.105809	6.3069	2.84678e-10	2.29752e-09
ZBTB2	ENSG00000181472.4	protein_coding	350.699	-0.858018	0.136045	-6.30685	2.8477e-10	2.29752e-09
PEPD	ENSG00000124299.9	protein_coding	849.37	-0.547611	0.086837	-6.3062	2.85969e-10	2.30603e-09
RORA	ENSG00000069667.11	protein_coding	107.61	1.479	0.234615	6.30393	2.90191e-10	2.3389e-09
BTF3	ENSG00000145741.11	protein_coding	7439.32	0.197107	0.0312683	6.30373	2.90567e-10	2.34075e-09
MROH1	ENSG00000179832.13	protein_coding	172.316	-1.23554	0.196005	-6.30363	2.90762e-10	2.34115e-09
HERC2	ENSG00000128731.11	protein_coding	603.492	0.652396	0.103511	6.30269	2.92528e-10	2.35418e-09
CBFB	ENSG00000067955.9	protein_coding	655.539	-0.650396	0.10321	-6.30168	2.94434e-10	2.36833e-09
DTX3L	ENSG00000163840.5	protein_coding	341.365	0.853455	0.135443	6.30124	2.95282e-10	2.37364e-09
TOB2	ENSG00000183864.4	protein_coding	456.831	0.740089	0.117452	6.30118	2.95391e-10	2.37364e-09
PLXND1	ENSG00000004399.8	protein_coding	730.985	0.589103	0.0935003	6.30055	2.96592e-10	2.3821e-09
COPB1	ENSG00000129083.8	protein_coding	1597.17	0.406708	0.0645728	6.29845	3.00646e-10	2.41345e-09
ATP13A2	ENSG00000159363.13	protein_coding	1009.07	-0.499445	0.0793346	-6.29543	3.0655e-10	2.45961e-09
MLLT4	ENSG00000130396.16	protein_coding	862.851	0.546186	0.0867643	6.29505	3.07295e-10	2.46436e-09
SP110	ENSG00000135899.12	protein_coding	329.621	0.850138	0.135059	6.29455	3.08292e-10	2.47112e-09
[truncated: 17,022 more rows]
