# Supplementary material for: SCIRT lncRNA Restrains Tumorigenesis by Opposing Transcriptional Programs of Tumor-Initiating Cells
Source: Oxford University Press journal article supplement (doi:10.1158/0008-5472.can-20-2612), 2020-11-10
Supplement: 00085472can202612-sup-248586_2_supp_6687195_qmyknn.xlsx [file 00085472can202612-sup-248586_2_supp_6687195_qmyknn.xlsx]

## Sheet: Enriched Pathways after 16 h
2559 genes up-regulated after 16 h of Sphere growth in comparison to adherent cells
Pathways	p-value	Adjusted p-value	Odd Ratio	Combined Score
Cytoplasmic Ribosomal Proteins WP477	1.295e-54	6.111e-52	6.67	828.11
TGF-beta Signaling Pathway WP366	4.059e-12	9.579e-10	2.84	74.55
Focal Adhesion WP306	2.084e-11	3.279e-09	2.41	59.22
Pathways in clear cell renal cell carcinoma WP4018	2.805e-10	3.31e-08	3.13	68.76
EGF/EGFR Signaling Pathway WP437	3.836e-10	3.621e-08	2.46	53.35
PI3K-Akt Signaling Pathway WP4172	5.53e-10	4.35e-08	1.95	41.65
Focal Adhesion-PI3K-Akt-mTOR-signaling pathway WP3932	1.608e-09	1.084e-07	1.99	40.22
VEGFA-VEGFR2 Signaling Pathway WP3888	2.445e-09	1.443e-07	2.12	42.03
Alpha 6 Beta 4 signaling pathway WP244	1.218e-08	6.389e-07	4.26	77.69
Photodynamic therapy-induced HIF-1 survival signaling WP3614	1.788e-08	8.441e-07	4.01	71.6
2344 genes down-regulated after 16 h of Sphere growth in comparison to adherent cells
Name	P-value	Adjusted p-value	Odds Ratio	Combined score
Retinoblastoma Gene in Cancer WP2446	7.614e-28	3.594e-25	5.2	324.57
DNA Replication WP466	2.631e-19	6.209e-17	6.09	260.74
Cell Cycle WP179	2.51e-13	3.949e-11	3.2	92.83
G1 to S cell cycle control WP45	2.835e-12	3.345e-10	4	106.35
DNA IR-damage and cellular response via ATR WP4016	1.833e-11	1.73e-09	3.52	87.01
Cholesterol Biosynthesis Pathway WP197	6.38e-11	5.019e-09	7.39	173.59
DNA Mismatch Repair WP531	2.841e-07	1.915e-05	7.58	114.33
Nucleotide Metabolism WP404	1.72e-06	0.0001015	4.94	65.57
Pyrimidine metabolism WP4022	2.625e-06	0.0001377	2.61	33.54
Trans-sulfuration and one carbon metabolism WP2525	3.365e-06	0.0001444	3.85	48.56

## Sheet: Enriched Pathways after 5 d
2636 genes up regulated after 5 d of Sphere growth in comparison to adherent cells
Name	P-value	Adjusted p-value	Odds Ratio	Combined score
EGF/EGFR Signaling Pathway WP437	1.096e-09	5.171e-07	2.39	49.28
TGF-beta Signaling Pathway WP366	2.225e-08	5.25e-06	2.41	42.54
Photodynamic therapy-induced HIF-1 survival signaling WP3614	1.969e-07	1.327e-05	3.69	56.99
Pathways in clear cell renal cell carcinoma WP4018	1.757e-07	1.382e-05	2.68	41.65
Primary Focal Segmental Glomerulosclerosis FSGS WP2572	1.732e-07	1.635e-05	2.85	44.3
Alpha 6 Beta 4 signaling pathway WP244	1.482e-07	1.749e-05	3.91	61.46
Nuclear Receptors Meta-Pathway WP2882	1.407e-07	2.214e-05	1.81	28.52
Adipogenesis WP236	3.947e-07	2.329e-05	2.28	33.56
VEGFA-VEGFR2 Signaling Pathway WP3888	6.328e-07	3.319e-05	1.9	27.07
Oncostatin M Signaling Pathway WP2374	1.149e-06	5.423e-05	2.8	38.31
2856 genes down-regulated after 5 d of Sphere growth in comparison to adherent cells
Cytoplasmic Ribosomal Proteins WP477	5.781e-26	2.729e-23	4.41	256.06
Retinoblastoma Gene in Cancer WP2446	2.52e-17	5.947e-15	3.7	141.51
DNA Replication WP466	1.297e-14	2.041e-12	4.67	149.28
Cell Cycle WP179	1.038e-07	1.225e-05	2.33	37.54
Gastric Cancer Network 2 WP2363	1.455e-07	1.374e-05	3.84	60.46
Pyrimidine metabolism WP4022	2.91e-07	2.289e-05	2.55	38.44
Photodynamic therapy-induced unfolded protein response WP3613	6.375e-07	4.299e-05	3.89	55.5
G1 to S cell cycle control WP45	9.163e-07	5.406e-05	2.74	38.03
DNA IR-damage and cellular response via ATR WP4016	9.055e-06	0.0004749	2.36	27.44
Ferroptosis WP4313	1.348e-05	0.0006364	2.98	33.38
