# Supplementary material for: SCIRT lncRNA Restrains Tumorigenesis by Opposing Transcriptional Programs of Tumor-Initiating Cells
Source: Oxford University Press journal article supplement (doi:10.1158/0008-5472.can-20-2612), 2020-11-10
Supplement: 00085472can202612-sup-248586_2_supp_6687196_q5yknn.xlsx [file 00085472can202612-sup-248586_2_supp_6687196_q5yknn.xlsx]

## Sheet: siSCIRT#1 vs siNC
Gene Symbol	Gencode	Biotype	baseMean	log2FoldChange	lfcSE	stat	pvalue	padj
SCG2	ENSG00000171951.4	protein_coding	1555.04	1.37812	0.0862112	15.9854	1.61636e-57	2.32579e-53
PRR11	ENSG00000068489.8	protein_coding	2270.62	-1.0456	0.0813043	-12.8604	7.51944e-38	5.40986e-34
DDAH1	ENSG00000153904.14	protein_coding	1812.65	-0.938297	0.0776171	-12.0888	1.21043e-33	5.80564e-30
NEK2	ENSG00000117650.8	protein_coding	1243.36	-1.17396	0.105185	-11.1609	6.33313e-29	2.27818e-25
CEP55	ENSG00000138180.11	protein_coding	3110.96	-1.02054	0.0926744	-11.0121	3.34076e-28	9.61405e-25
NCAPG	ENSG00000109805.5	protein_coding	3033.24	-0.903532	0.0830406	-10.8806	1.42618e-27	3.42022e-24
AURKA	ENSG00000087586.13	protein_coding	4293.05	-0.942336	0.0887985	-10.6121	2.61889e-26	5.38331e-23
MELK	ENSG00000165304.3	protein_coding	1898.68	-0.954997	0.0906335	-10.5369	5.83901e-26	1.05022e-22
DEPDC1	ENSG00000024526.12	protein_coding	1640.84	-0.895437	0.0861528	-10.3936	2.652e-25	4.23995e-22
BUB1	ENSG00000169679.10	protein_coding	2900.09	-0.939201	0.0912339	-10.2944	7.46542e-25	1.0742e-21
CCNA2	ENSG00000145386.5	protein_coding	3145.91	-0.91655	0.0892352	-10.2712	9.50511e-25	1.24335e-21
NUF2	ENSG00000143228.8	protein_coding	1560.6	-0.923347	0.0922688	-10.0071	1.41793e-23	1.70022e-20
CTGF	ENSG00000118523.5	protein_coding	4203.06	-0.713432	0.0725289	-9.83652	7.8373e-23	8.67468e-20
KIF14	ENSG00000118193.7	protein_coding	1544.93	-0.856234	0.0872744	-9.81083	1.01135e-22	1.03945e-19
DLGAP5	ENSG00000126787.8	protein_coding	5290.25	-0.875036	0.0893766	-9.79044	1.23755e-22	1.18714e-19
ARHGAP11A	ENSG00000198826.6	protein_coding	2048.24	-0.809358	0.0827542	-9.78026	1.36854e-22	1.23075e-19
MKI67	ENSG00000148773.8	protein_coding	13594.9	-0.910395	0.0933282	-9.75476	1.76013e-22	1.4898e-19
CENPF	ENSG00000117724.8	protein_coding	11166.7	-0.810172	0.0837841	-9.66975	4.0535e-22	3.24033e-19
KIF23	ENSG00000137807.9	protein_coding	2422.18	-0.927561	0.0962359	-9.63841	5.50342e-22	4.16783e-19
TOP2A	ENSG00000131747.10	protein_coding	17980.1	-0.827092	0.0864285	-9.56966	1.07257e-21	7.71659e-19
KIF20B	ENSG00000138182.10	protein_coding	2088.06	-0.834662	0.0875906	-9.52912	1.58618e-21	1.08683e-18
TPX2	ENSG00000088325.11	protein_coding	9056.18	-0.84607	0.0893502	-9.46914	2.82149e-21	1.84538e-18
CYR61	ENSG00000142871.11	protein_coding	7544.91	-0.709908	0.0751871	-9.44188	3.66155e-21	2.2907e-18
SLC6A14	ENSG00000087916.7	protein_coding	238.295	-1.22933	0.130494	-9.42058	4.48615e-21	2.68964e-18
GTSE1	ENSG00000075218.14	protein_coding	1663.67	-0.871663	0.0927424	-9.39876	5.52099e-21	3.17766e-18
CCNB2	ENSG00000157456.3	protein_coding	2064.06	-0.897543	0.0955699	-9.39148	5.91623e-21	3.27418e-18
CDC20	ENSG00000117399.9	protein_coding	4336.23	-0.897056	0.0958693	-9.35708	8.19736e-21	4.36859e-18
DIAPH3	ENSG00000139734.13	protein_coding	1147.8	-0.896885	0.0968813	-9.25757	2.0914e-20	1.07476e-17
RPA1	ENSG00000132383.7	protein_coding	6442.8	-0.75502	0.0816861	-9.24294	2.39807e-20	1.18986e-17
CCNB1	ENSG00000134057.10	protein_coding	6347.21	-0.871142	0.0946488	-9.20394	3.45063e-20	1.65504e-17
TMEM2	ENSG00000135048.9	protein_coding	5941.89	-0.673594	0.0739443	-9.10948	8.27772e-20	3.8422e-17
CDCA8	ENSG00000134690.6	protein_coding	2374.4	-0.89126	0.0979062	-9.10321	8.7701e-20	3.94353e-17
CKAP2L	ENSG00000169607.8	protein_coding	1529.13	-0.840056	0.0930638	-9.02666	1.76991e-19	7.71732e-17
NUSAP1	ENSG00000137804.8	protein_coding	3784.94	-0.824206	0.0915458	-9.00322	2.19201e-19	9.27671e-17
NCAPH	ENSG00000121152.5	protein_coding	1904.08	-0.913949	0.101923	-8.96707	3.04506e-19	1.25187e-16
TTK	ENSG00000112742.5	protein_coding	1547.62	-0.852001	0.0952476	-8.94512	3.71555e-19	1.48509e-16
SERPIND1	ENSG00000099937.6	protein_coding	1487.08	-0.938012	0.105168	-8.9192	4.6967e-19	1.82651e-16
ASPM	ENSG00000066279.12	protein_coding	4239.45	-0.70195	0.0794663	-8.8333	1.01631e-18	3.84833e-16
HMGCS1	ENSG00000112972.10	protein_coding	9210.76	-0.602786	0.0683783	-8.81546	1.19198e-18	4.3978e-16
BMF	ENSG00000104081.9	protein_coding	1959.53	0.708004	0.0810772	8.73247	2.49174e-18	8.96341e-16
STEAP3	ENSG00000115107.15	protein_coding	7368.48	0.824679	0.0950418	8.67701	4.06296e-18	1.4259e-15
HLA-H	ENSG00000206341.6	pseudogene	1300.84	-1.06429	0.122893	-8.66029	4.70556e-18	1.6121e-15
SHCBP1	ENSG00000171241.4	protein_coding	1089.87	-0.826631	0.0959163	-8.61825	6.79839e-18	2.27493e-15
EDIL3	ENSG00000164176.8	protein_coding	5115.97	0.755137	0.0883672	8.54544	1.28042e-17	4.18728e-15
PBK	ENSG00000168078.5	protein_coding	1324.87	-0.781815	0.0917669	-8.51957	1.6014e-17	5.12057e-15
TLN1	ENSG00000137076.14	protein_coding	35726.1	0.752206	0.0888025	8.47055	2.44232e-17	7.63968e-15
HJURP	ENSG00000123485.7	protein_coding	3134.08	-0.807974	0.0955829	-8.45313	2.83599e-17	8.68236e-15
CIT	ENSG00000122966.9	protein_coding	4256.14	-0.811395	0.0966779	-8.39276	4.74846e-17	1.42345e-14
CSGALNACT1	ENSG00000147408.10	protein_coding	1234.95	0.727858	0.0867775	8.38764	4.96019e-17	1.45657e-14
KIF18B	ENSG00000186185.9	protein_coding	1614.29	-0.860757	0.103067	-8.35145	6.74316e-17	1.94055e-14
SMC4	ENSG00000113810.11	protein_coding	3779.67	-0.662325	0.0795486	-8.32604	8.35936e-17	2.35849e-14
AURKB	ENSG00000178999.8	protein_coding	1596.7	-0.878548	0.10641	-8.25622	1.50362e-16	4.1607e-14
KIF2C	ENSG00000142945.8	protein_coding	4158.98	-0.820401	0.0995588	-8.24037	1.7168e-16	4.66096e-14
NDC80	ENSG00000080986.8	protein_coding	1964.86	-0.814167	0.0988658	-8.23507	1.7945e-16	4.78167e-14
KIAA1524	ENSG00000163507.9	protein_coding	1306.27	-0.704095	0.0858959	-8.19708	2.46304e-16	6.44377e-14
BIRC5	ENSG00000089685.10	protein_coding	873.329	-0.928168	0.113981	-8.14321	3.84946e-16	9.89106e-14
MCM10	ENSG00000065328.12	protein_coding	798.574	-0.869321	0.106891	-8.13277	4.19605e-16	1.04098e-13
SYT12	ENSG00000173227.9	protein_coding	1346.86	0.710172	0.087311	8.13382	4.15959e-16	1.04098e-13
UBE2C	ENSG00000175063.12	protein_coding	3962.15	-0.821177	0.101075	-8.12445	4.49386e-16	1.09597e-13
CENPI	ENSG00000102384.9	protein_coding	805.311	-0.743255	0.091517	-8.1215	4.60455e-16	1.10425e-13
PARPBP	ENSG00000185480.7	protein_coding	613.236	-0.803243	0.0994558	-8.07638	6.67183e-16	1.57379e-13
ANLN	ENSG00000011426.6	protein_coding	5720.76	-0.686772	0.0853018	-8.05108	8.20637e-16	1.90454e-13
SYS1	ENSG00000204070.5	protein_coding	1592.63	0.633464	0.0787485	8.04414	8.68528e-16	1.98369e-13
LMNB1	ENSG00000113368.7	protein_coding	3491.84	-0.756159	0.0941345	-8.03275	9.53117e-16	2.14287e-13
IQGAP3	ENSG00000183856.6	protein_coding	5129.94	-0.767112	0.0955406	-8.02918	9.81282e-16	2.17226e-13
NUDT15	ENSG00000136159.3	protein_coding	900.903	0.786216	0.0981222	8.01262	1.12288e-15	2.44804e-13
BUB1B	ENSG00000156970.8	protein_coding	1760.31	-0.754843	0.0944126	-7.99515	1.2942e-15	2.77943e-13
SPDL1	ENSG00000040275.12	protein_coding	2059.12	-0.69786	0.0873434	-7.98985	1.35106e-15	2.85889e-13
DTL	ENSG00000143476.13	protein_coding	1235.08	-0.819673	0.102659	-7.9844	1.41213e-15	2.9448e-13
PLB1	ENSG00000163803.8	protein_coding	684.648	-0.742616	0.0930507	-7.98077	1.4542e-15	2.98922e-13
KIFC1	ENSG00000237649.3	protein_coding	2195.37	-0.771169	0.0966667	-7.9776	1.49202e-15	3.02375e-13
HMMR	ENSG00000072571.15	protein_coding	258.961	-1.03512	0.129933	-7.96652	1.63199e-15	3.21681e-13
MAPK3	ENSG00000102882.7	protein_coding	2465.68	0.709242	0.0890258	7.9667	1.62967e-15	3.21681e-13
TMEM97	ENSG00000109084.9	protein_coding	1242.5	-0.710666	0.0896378	-7.92819	2.22358e-15	4.32366e-13
CENPE	ENSG00000138778.7	protein_coding	2555.98	-0.70603	0.0893318	-7.90346	2.71274e-15	5.20448e-13
BRCA1	ENSG00000012048.15	protein_coding	845.425	-0.819791	0.104327	-7.85786	3.90736e-15	7.39777e-13
NCAPD2	ENSG00000010292.8	protein_coding	6841.36	-0.644679	0.082089	-7.85342	4.04844e-15	7.56533e-13
EMP2	ENSG00000213853.5	protein_coding	1176.28	0.754225	0.0964447	7.82028	5.27052e-15	9.72276e-13
CDK1	ENSG00000170312.11	protein_coding	2992.47	-0.773532	0.0989667	-7.81608	5.44931e-15	9.92533e-13
ZNF367	ENSG00000165244.6	protein_coding	531.624	-0.813432	0.104433	-7.789	6.7539e-15	1.21477e-12
WDHD1	ENSG00000198554.7	protein_coding	1817.28	-0.708421	0.0912148	-7.76652	8.06748e-15	1.43312e-12
LGALS3	ENSG00000131981.11	protein_coding	20890.9	0.68724	0.0887255	7.74569	9.50638e-15	1.66814e-12
TOP1MT	ENSG00000184428.8	protein_coding	1851.96	0.771603	0.100294	7.69344	1.43232e-14	2.48308e-12
MLF1IP	ENSG00000151725.7	protein_coding	1994.75	-0.773488	0.100714	-7.68008	1.58989e-14	2.72344e-12
PSAT1	ENSG00000135069.9	protein_coding	1689.7	-0.706461	0.0920992	-7.67066	1.71114e-14	2.89666e-12
IL10RB	ENSG00000243646.4	protein_coding	724.528	0.747255	0.0974706	7.66646	1.76802e-14	2.95815e-12
PLK4	ENSG00000142731.6	protein_coding	1247.15	-0.74062	0.096721	-7.65728	1.89915e-14	3.14086e-12
F2RL1	ENSG00000164251.4	protein_coding	23131	-0.537428	0.0701987	-7.65582	1.92088e-14	3.14086e-12
COL7A1	ENSG00000114270.11	protein_coding	7559.72	0.5689	0.0743241	7.65431	1.94356e-14	3.14224e-12
MYBL2	ENSG00000101057.11	protein_coding	1492.17	-0.812303	0.106521	-7.62573	2.42653e-14	3.87948e-12
FOXM1	ENSG00000111206.8	protein_coding	2190.3	-0.778657	0.102154	-7.62237	2.49058e-14	3.93812e-12
PTTG1	ENSG00000164611.8	protein_coding	4000.8	-0.850837	0.111697	-7.61734	2.58957e-14	4.05014e-12
TMPO	ENSG00000120802.9	protein_coding	6842.02	-0.59752	0.0785034	-7.61139	2.71174e-14	4.19561e-12
FBXO43	ENSG00000156509.9	protein_coding	248.857	-0.951727	0.125436	-7.58735	3.26514e-14	4.99809e-12
SPAG5	ENSG00000076382.12	protein_coding	3231.85	-0.7625	0.100557	-7.58277	3.38256e-14	5.12333e-12
TK2	ENSG00000166548.11	protein_coding	2440.43	0.624686	0.0824855	7.57328	3.63912e-14	5.45451e-12
HMGB2	ENSG00000164104.7	protein_coding	5786.95	-0.733995	0.0970011	-7.56688	3.82306e-14	5.67113e-12
FAM83D	ENSG00000101447.9	protein_coding	1301.86	-0.745619	0.0987378	-7.5515	4.3026e-14	6.31736e-12
MASTL	ENSG00000120539.10	protein_coding	1406.66	-0.685863	0.091009	-7.53621	4.83835e-14	7.03223e-12
CHRDL1	ENSG00000101938.10	protein_coding	1380.7	0.864306	0.11474	7.53277	4.96761e-14	7.1479e-12
ASF1B	ENSG00000105011.4	protein_coding	2251.26	-0.775535	0.10384	-7.4686	8.10548e-14	1.15311e-11
ERCC6L	ENSG00000186871.5	protein_coding	823.888	-0.821246	0.109976	-7.46749	8.1741e-14	1.15311e-11
PARP4	ENSG00000102699.5	protein_coding	12104.7	-0.518652	0.0698955	-7.4204	1.16771e-13	1.63128e-11
KPNA2	ENSG00000182481.4	protein_coding	12956	-0.598778	0.0808635	-7.4048	1.31346e-13	1.81724e-11
COL4A1	ENSG00000187498.10	protein_coding	3705.16	-0.565949	0.0765382	-7.39433	1.42125e-13	1.94765e-11
MCM3	ENSG00000112118.13	protein_coding	7714.64	-0.661849	0.0895716	-7.38905	1.47885e-13	2.00746e-11
RRM2	ENSG00000171848.9	protein_coding	3669.43	-0.670725	0.0907924	-7.38746	1.49656e-13	2.01252e-11
C4orf21	ENSG00000138658.11	protein_coding	450.354	-0.811481	0.1102	-7.36373	1.78841e-13	2.38272e-11
CASC5	ENSG00000137812.15	protein_coding	1342.38	-0.690529	0.093792	-7.36234	1.80712e-13	2.38556e-11
C7	ENSG00000112936.14	protein_coding	334.955	0.879712	0.120343	7.31004	2.67057e-13	3.49335e-11
DNAH5	ENSG00000039139.9	protein_coding	1127.6	-0.638497	0.0874531	-7.30102	2.85593e-13	3.70216e-11
ECT2	ENSG00000114346.9	protein_coding	5170.5	-0.514225	0.0705161	-7.29231	3.04685e-13	3.91439e-11
TACC3	ENSG00000013810.14	protein_coding	3268.26	-0.715031	0.0981178	-7.28747	3.15819e-13	4.02152e-11
CENPA	ENSG00000115163.10	protein_coding	506.729	-0.830858	0.114158	-7.27811	3.38528e-13	4.23573e-11
SLC14A1	ENSG00000141469.12	protein_coding	400.871	0.917397	0.12604	7.27862	3.37262e-13	4.23573e-11
RACGAP1	ENSG00000161800.8	protein_coding	3394.98	-0.709416	0.0977499	-7.25745	3.94442e-13	4.89278e-11
VIPR1	ENSG00000114812.8	protein_coding	7423.57	0.564288	0.0780555	7.22932	4.85422e-13	5.96986e-11
KIF4A	ENSG00000090889.10	protein_coding	2722.21	-0.629623	0.0871961	-7.22077	5.1693e-13	6.30348e-11
WDR62	ENSG00000075702.12	protein_coding	1421.87	-0.737947	0.102219	-7.21927	5.22665e-13	6.31985e-11
SAR1B	ENSG00000152700.9	protein_coding	1634.32	0.684792	0.0951633	7.19597	6.20181e-13	7.43649e-11
XPR1	ENSG00000143324.9	protein_coding	1933.53	0.64013	0.0892539	7.17202	7.38997e-13	8.78795e-11
SQLE	ENSG00000104549.7	protein_coding	2108.18	-0.578732	0.0807163	-7.16995	7.50234e-13	8.84845e-11
CDCA5	ENSG00000146670.5	protein_coding	2289.67	-0.731059	0.10205	-7.1637	7.85267e-13	9.18634e-11
RP5-1120P11.1	ENSG00000237686.2	antisense	202.604	-0.947632	0.132344	-7.16037	8.04571e-13	9.33626e-11
FANCI	ENSG00000140525.13	protein_coding	1742.19	-0.681013	0.0953776	-7.14018	9.32107e-13	1.06445e-10
MTMR14	ENSG00000163719.14	protein_coding	3006.8	-0.536249	0.0750936	-7.14108	9.26012e-13	1.06445e-10
ALCAM	ENSG00000170017.8	protein_coding	8680.97	0.706538	0.0992567	7.11829	1.09274e-12	1.23807e-10
FER1L4	ENSG00000088340.11	pseudogene	1073.43	0.722811	0.101787	7.10118	1.23692e-12	1.39047e-10
C11orf82	ENSG00000165490.8	protein_coding	381.843	-0.816597	0.115071	-7.09648	1.27971e-12	1.42743e-10
CENPQ	ENSG00000031691.6	protein_coding	592.636	-0.767526	0.108456	-7.07683	1.47485e-12	1.63243e-10
SLC41A1	ENSG00000133065.6	protein_coding	2910.47	0.5546	0.0787763	7.04019	1.91972e-12	2.09264e-10
GALNT6	ENSG00000139629.11	protein_coding	2213.17	-0.548039	0.0778398	-7.04061	1.91406e-12	2.09264e-10
INSIG1	ENSG00000186480.8	protein_coding	12012.5	-0.582864	0.0828531	-7.03491	1.99392e-12	2.15719e-10
INCENP	ENSG00000149503.8	protein_coding	2183.72	-0.652018	0.0927464	-7.03012	2.06357e-12	2.19946e-10
LSM14A	ENSG00000257103.4	protein_coding	4376.14	0.629735	0.0895755	7.03022	2.06213e-12	2.19946e-10
SNED1	ENSG00000162804.9	protein_coding	2614.96	0.660293	0.0940439	7.02111	2.20108e-12	2.32878e-10
HMGCR	ENSG00000113161.11	protein_coding	7476.52	-0.46741	0.0668082	-6.99631	2.628e-12	2.76017e-10
FANCD2	ENSG00000144554.6	protein_coding	698.549	-0.752665	0.107812	-6.98129	2.92486e-12	3.0497e-10
TGFBR2	ENSG00000163513.13	protein_coding	41367	-0.447417	0.0644078	-6.94662	3.74134e-12	3.87296e-10
CDC25C	ENSG00000158402.14	protein_coding	599.896	-0.841832	0.121427	-6.93284	4.12479e-12	4.2394e-10
CD22	ENSG00000012124.10	protein_coding	623.434	-0.782722	0.113133	-6.91862	4.56057e-12	4.65405e-10
KIAA0101	ENSG00000166803.6	protein_coding	524.51	-0.814218	0.117809	-6.91132	4.80165e-12	4.86556e-10
KNTC1	ENSG00000184445.7	protein_coding	2838.73	-0.609612	0.0885518	-6.88424	5.80959e-12	5.84575e-10
TMEM194A	ENSG00000166881.5	protein_coding	1908.73	-0.560219	0.0814893	-6.87475	6.20971e-12	6.20496e-10
RRM1	ENSG00000167325.10	protein_coding	4734.17	-0.613287	0.0892614	-6.87068	6.38954e-12	6.34062e-10
DHCR24	ENSG00000116133.7	protein_coding	19088.8	-0.489764	0.0713375	-6.86544	6.62874e-12	6.53295e-10
ORC1	ENSG00000085840.8	protein_coding	468.376	-0.803661	0.117153	-6.85995	6.8887e-12	6.74296e-10
KIF15	ENSG00000163808.12	protein_coding	1207.73	-0.733955	0.107028	-6.85758	7.00386e-12	6.80936e-10
THG1L	ENSG00000113272.9	protein_coding	762.125	0.666116	0.0971749	6.85481	7.1406e-12	6.89571e-10
PLK1	ENSG00000166851.10	protein_coding	2390.58	-0.641435	0.0940376	-6.82105	9.03781e-12	8.66967e-10
NCAPG2	ENSG00000146918.15	protein_coding	3651.52	-0.596063	0.0875885	-6.80527	1.00862e-11	9.61126e-10
KCNN4	ENSG00000104783.7	protein_coding	6766.76	0.509915	0.0752517	6.77613	1.23442e-11	1.16092e-09
CERCAM	ENSG00000167123.14	protein_coding	7536.61	0.639369	0.0943465	6.77682	1.22853e-11	1.16092e-09
SKA3	ENSG00000165480.11	protein_coding	700.507	-0.743347	0.10977	-6.77186	1.27141e-11	1.18795e-09
CKAP2	ENSG00000136108.10	protein_coding	3121.76	-0.543185	0.0802347	-6.76995	1.2883e-11	1.19595e-09
COL6A1	ENSG00000142156.10	protein_coding	16763.5	0.469152	0.0693838	6.76169	1.3639e-11	1.25802e-09
NEIL3	ENSG00000109674.3	protein_coding	327.044	-0.846888	0.125359	-6.7557	1.4215e-11	1.3028e-09
BRI3BP	ENSG00000184992.10	protein_coding	934.736	-0.591849	0.0877546	-6.74436	1.53706e-11	1.39979e-09
RP11-30P6.6	ENSG00000234155.1	lincRNA	70.7958	-1.11061	0.164945	-6.73322	1.65947e-11	1.50176e-09
ERMP1	ENSG00000099219.9	protein_coding	1360.91	0.661436	0.0983762	6.72354	1.77363e-11	1.59505e-09
SKA1	ENSG00000154839.5	protein_coding	479.58	-0.767982	0.11446	-6.70961	1.95144e-11	1.74405e-09
TMEM156	ENSG00000121895.7	protein_coding	1775.03	-0.554609	0.0829033	-6.68982	2.23438e-11	1.9846e-09
SGOL2	ENSG00000163535.13	protein_coding	1056.57	-0.619001	0.0929455	-6.65983	2.74139e-11	2.41999e-09
TYMS	ENSG00000176890.11	protein_coding	1327.67	-0.608291	0.0916842	-6.63463	3.25312e-11	2.85422e-09
ESPL1	ENSG00000135476.7	protein_coding	1686.44	-0.664444	0.100451	-6.6146	3.72549e-11	3.24885e-09
BRCA2	ENSG00000139618.10	protein_coding	579.52	-0.670344	0.101558	-6.60057	4.09567e-11	3.55016e-09
RBL1	ENSG00000080839.7	protein_coding	1018.74	-0.611757	0.0927297	-6.59721	4.18967e-11	3.60989e-09
ESCO2	ENSG00000171320.10	protein_coding	317.7	-0.779198	0.118175	-6.59361	4.29266e-11	3.67661e-09
MAD2L1	ENSG00000164109.9	protein_coding	1576.49	-0.696948	0.105819	-6.58625	4.51087e-11	3.84065e-09
CKS2	ENSG00000123975.4	protein_coding	3145.29	-0.727507	0.110527	-6.58216	4.63657e-11	3.92444e-09
SCAMP1	ENSG00000085365.13	protein_coding	2515.9	0.744061	0.113281	6.56826	5.09066e-11	4.2836e-09
YWHAH	ENSG00000128245.10	protein_coding	3325.69	0.51951	0.0791412	6.56434	5.22639e-11	4.37224e-09
LOXL4	ENSG00000138131.3	protein_coding	21560.9	0.557448	0.0852426	6.53954	6.17066e-11	5.13235e-09
CDC6	ENSG00000094804.5	protein_coding	1844.36	-0.690963	0.105754	-6.53368	6.41748e-11	5.30696e-09
SLC7A11	ENSG00000151012.9	protein_coding	3115.58	-0.544247	0.0833659	-6.52842	6.64668e-11	5.46509e-09
CNTRL	ENSG00000119397.12	protein_coding	1200.91	-0.613653	0.0945449	-6.4906	8.5497e-11	6.98986e-09
TMEM71	ENSG00000165071.10	protein_coding	1249.6	-0.588865	0.0907738	-6.48717	8.74647e-11	7.11034e-09
IQSEC1	ENSG00000144711.9	protein_coding	1494.97	0.598496	0.0922728	6.48616	8.80545e-11	7.11807e-09
F2R	ENSG00000181104.6	protein_coding	4831.87	0.582565	0.0901629	6.46125	1.03843e-10	8.3475e-09
KNSTRN	ENSG00000128944.9	protein_coding	1422.86	-0.658195	0.101904	-6.45899	1.05401e-10	8.42565e-09
HMGN2	ENSG00000198830.6	protein_coding	15815	-0.512839	0.0794995	-6.45085	1.11225e-10	8.84212e-09
NEGR1	ENSG00000172260.9	protein_coding	125.118	0.957251	0.148467	6.44756	1.13668e-10	8.98665e-09
HIPK3	ENSG00000110422.7	protein_coding	3588.43	0.702867	0.10917	6.43828	1.20832e-10	9.50086e-09
SGOL1	ENSG00000129810.10	protein_coding	320.836	-0.784308	0.122039	-6.42669	1.3041e-10	1.01982e-08
CDCA2	ENSG00000184661.9	protein_coding	912.905	-0.668429	0.104158	-6.41747	1.38556e-10	1.07767e-08
XKRX	ENSG00000182489.7	protein_coding	255.445	0.850624	0.132569	6.41647	1.39473e-10	1.07897e-08
COL5A1	ENSG00000130635.11	protein_coding	16078.7	0.506698	0.0789793	6.41558	1.40291e-10	1.07949e-08
CDCA3	ENSG00000111665.7	protein_coding	1001.35	-0.744709	0.11611	-6.41382	1.4192e-10	1.08622e-08
IL6ST	ENSG00000134352.15	protein_coding	11383.9	0.650726	0.101501	6.41104	1.44531e-10	1.09456e-08
CDC25A	ENSG00000164045.7	protein_coding	639.568	-0.761662	0.1188	-6.41128	1.44299e-10	1.09456e-08
RFC5	ENSG00000111445.9	protein_coding	1550.86	-0.662221	0.10338	-6.40569	1.49695e-10	1.12773e-08
LMO7	ENSG00000136153.15	protein_coding	7671.96	-0.428209	0.0669719	-6.39386	1.61749e-10	1.21219e-08
ATAD2	ENSG00000156802.8	protein_coding	3651.32	-0.537245	0.0841071	-6.38763	1.68479e-10	1.25423e-08
CTD-2510F5.4	ENSG00000265415.1	antisense	234.283	-0.805876	0.126173	-6.38706	1.69102e-10	1.25423e-08
HS1BP3	ENSG00000118960.8	protein_coding	1606.84	0.579614	0.0908938	6.37683	1.80791e-10	1.33405e-08
ARHGAP11B	ENSG00000187951.6	protein_coding	592.536	-0.656913	0.103124	-6.37009	1.88912e-10	1.38686e-08
TROAP	ENSG00000135451.8	protein_coding	1213.92	-0.749422	0.117705	-6.36693	1.92849e-10	1.40858e-08
LDLR	ENSG00000130164.7	protein_coding	44190.8	-0.435504	0.0684567	-6.36174	1.99478e-10	1.44964e-08
POC1A	ENSG00000164087.3	protein_coding	1091.49	-0.645002	0.101497	-6.35487	2.08598e-10	1.5083e-08
CCNF	ENSG00000162063.8	protein_coding	1220.1	-0.685023	0.107918	-6.34765	2.18634e-10	1.56999e-08
EXO1	ENSG00000174371.12	protein_coding	699.47	-0.743298	0.117107	-6.34717	2.19312e-10	1.56999e-08
RBM15B	ENSG00000179837.6	protein_coding	4832.18	0.436304	0.0688749	6.33473	2.3776e-10	1.69363e-08
DEPDC1B	ENSG00000035499.8	protein_coding	526.802	-0.699639	0.110844	-6.31191	2.75605e-10	1.94474e-08
ST3GAL5	ENSG00000115525.12	protein_coding	3098.68	0.48581	0.0769678	6.31185	2.75715e-10	1.94474e-08
CHAF1B	ENSG00000159259.7	protein_coding	390.401	-0.733526	0.116704	-6.28534	3.27142e-10	2.29622e-08
MBP	ENSG00000197971.10	protein_coding	7290.95	-0.410926	0.0653945	-6.2838	3.30388e-10	2.30774e-08
POLE2	ENSG00000100479.8	protein_coding	544.275	-0.706001	0.112464	-6.27756	3.43936e-10	2.37928e-08
ZBTB47	ENSG00000114853.9	protein_coding	1723.25	0.502915	0.0801041	6.27827	3.4236e-10	2.37928e-08
FAM72D	ENSG00000215784.4	protein_coding	236.124	-0.85753	0.136749	-6.27083	3.59138e-10	2.47255e-08
TRIM47	ENSG00000132481.2	protein_coding	1580.83	0.535034	0.0854638	6.26036	3.84097e-10	2.6318e-08
HBEGF	ENSG00000113070.6	protein_coding	1946.94	-0.517178	0.082913	-6.2376	4.4433e-10	3.03008e-08
F13A1	ENSG00000124491.11	protein_coding	487.688	-0.709711	0.11391	-6.23048	4.65018e-10	3.1562e-08
TNFRSF1B	ENSG00000028137.12	protein_coding	2179.05	0.523267	0.0840382	6.22654	4.76846e-10	3.20624e-08
LIPG	ENSG00000101670.7	protein_coding	759.763	-0.60386	0.0969798	-6.22666	4.76484e-10	3.20624e-08
C4B	ENSG00000224389.4	protein_coding	384.923	0.741672	0.11931	6.21635	5.08857e-10	3.40555e-08
KIF20A	ENSG00000112984.7	protein_coding	4450.82	-0.534404	0.0861856	-6.20061	5.62436e-10	3.74671e-08
MOGS	ENSG00000115275.7	protein_coding	5908.17	0.454812	0.0736725	6.17342	6.68266e-10	4.43119e-08
PLXNA3	ENSG00000130827.5	protein_coding	7764.64	0.413159	0.067089	6.15837	7.34996e-10	4.85131e-08
STIL	ENSG00000123473.11	protein_coding	2012.21	-0.544014	0.0883574	-6.15697	7.41489e-10	4.87182e-08
FAM72B	ENSG00000188610.8	protein_coding	158.09	-0.928169	0.150901	-6.15084	7.70738e-10	5.04098e-08
ZWINT	ENSG00000122952.12	protein_coding	3403.42	-0.694222	0.112886	-6.14975	7.7607e-10	5.05288e-08
RCSD1	ENSG00000198771.6	protein_coding	941.122	-0.602116	0.0981576	-6.13418	8.55985e-10	5.54809e-08
CKS1B	ENSG00000173207.8	protein_coding	4172.92	-0.604176	0.0986389	-6.12513	9.0609e-10	5.84651e-08
ANXA3	ENSG00000138772.8	protein_coding	3779.54	-0.538719	0.0882705	-6.10304	1.04067e-09	6.65521e-08
CPNE2	ENSG00000140848.12	protein_coding	1521.79	0.545578	0.0893892	6.1034	1.03835e-09	6.65521e-08
SPEG	ENSG00000072195.10	protein_coding	1861.7	0.605396	0.099369	6.09241	1.11226e-09	7.02482e-08
FEN1	ENSG00000168496.3	protein_coding	3786.25	-0.588418	0.096581	-6.09249	1.11169e-09	7.02482e-08
LBH	ENSG00000213626.7	protein_coding	649.003	0.663326	0.10888	6.09228	1.11311e-09	7.02482e-08
HIST1H2BD	ENSG00000158373.7	protein_coding	2545.44	0.490681	0.0806088	6.08719	1.14909e-09	7.22017e-08
RFC3	ENSG00000133119.8	protein_coding	526.085	-0.67528	0.110982	-6.08461	1.16774e-09	7.30546e-08
BORA	ENSG00000136122.11	protein_coding	427.018	-0.704676	0.115912	-6.0794	1.20629e-09	7.51401e-08
ITGB4	ENSG00000132470.9	protein_coding	34264.4	0.460666	0.0758282	6.07513	1.23889e-09	7.68381e-08
ROR1	ENSG00000185483.7	protein_coding	2678.94	-0.479329	0.0789251	-6.07321	1.25376e-09	7.74266e-08
PIF1	ENSG00000140451.8	protein_coding	309.688	-0.840345	0.13842	-6.07097	1.27137e-09	7.81787e-08
GAS2L3	ENSG00000139354.6	protein_coding	979.254	-0.597023	0.0984909	-6.06171	1.34679e-09	8.24638e-08
NT5DC2	ENSG00000168268.6	protein_coding	5265.26	0.463434	0.07656	6.05321	1.41989e-09	8.65715e-08
SMC2	ENSG00000136824.14	protein_coding	3869.33	-0.420335	0.0697184	-6.02904	1.64941e-09	1.00141e-07
APOBEC3B	ENSG00000179750.11	protein_coding	490.221	-0.685811	0.113846	-6.024	1.70159e-09	1.02874e-07
ELOVL5	ENSG00000012660.9	protein_coding	8802.67	-0.409624	0.0680309	-6.02114	1.73196e-09	1.04273e-07
BRIP1	ENSG00000136492.4	protein_coding	753.69	-0.574146	0.0953937	-6.0187	1.75821e-09	1.05089e-07
PPP1R14B	ENSG00000173457.6	protein_coding	11656.5	0.59499	0.0988598	6.01853	1.76012e-09	1.05089e-07
TRIB2	ENSG00000071575.7	protein_coding	13317.6	0.448164	0.0745025	6.01542	1.79418e-09	1.0668e-07
EVI2B	ENSG00000185862.5	protein_coding	646.412	-0.609672	0.101378	-6.01383	1.81195e-09	1.07293e-07
UCK1	ENSG00000130717.8	protein_coding	1699.71	0.540899	0.090318	5.98882	2.11364e-09	1.24644e-07
CENPW	ENSG00000203760.4	protein_coding	491.539	-0.770958	0.128809	-5.98528	2.16015e-09	1.26867e-07
CDC45	ENSG00000093009.5	protein_coding	632.117	-0.73215	0.12251	-5.97624	2.2834e-09	1.3356e-07
RNF182	ENSG00000180537.8	protein_coding	1044.82	0.577835	0.0967285	5.97378	2.31817e-09	1.35045e-07
PYGB	ENSG00000100994.7	protein_coding	38271	0.401329	0.0672637	5.96651	2.42384e-09	1.40632e-07
MUC1	ENSG00000185499.12	protein_coding	1565.71	0.660893	0.110922	5.95816	2.55097e-09	1.47413e-07
MAP4K4	ENSG00000071054.11	protein_coding	28562	-0.379537	0.0638052	-5.94837	2.70826e-09	1.55876e-07
HID1	ENSG00000167861.11	protein_coding	4451.52	0.440945	0.0742074	5.94207	2.81453e-09	1.61347e-07
FAM64A	ENSG00000129195.11	protein_coding	1309.71	-0.690441	0.116377	-5.93278	2.97853e-09	1.70072e-07
GGT1	ENSG00000100031.14	protein_coding	2551.73	0.518677	0.0875086	5.92716	3.08225e-09	1.75298e-07
SPOCK1	ENSG00000152377.8	protein_coding	746.231	-0.563553	0.0951134	-5.92507	3.12161e-09	1.76838e-07
TFRC	ENSG00000072274.8	protein_coding	4618.3	-0.449392	0.0762197	-5.89601	3.72391e-09	2.10131e-07
ATP13A2	ENSG00000159363.13	protein_coding	7560.04	-0.401849	0.0681866	-5.89337	3.78395e-09	2.11857e-07
CTPS1	ENSG00000171793.9	protein_coding	2263.78	-0.53709	0.0911293	-5.89372	3.77608e-09	2.11857e-07
LPXN	ENSG00000110031.8	protein_coding	1697.96	-0.484375	0.08221	-5.89192	3.81728e-09	2.12895e-07
HMGN5	ENSG00000198157.6	protein_coding	316.674	-0.736781	0.125153	-5.88704	3.93175e-09	2.18432e-07
GCNT2	ENSG00000111846.11	protein_coding	3909.98	-0.410369	0.0697396	-5.8843	3.99736e-09	2.21223e-07
CEP128	ENSG00000100629.12	protein_coding	327.052	-0.761579	0.129506	-5.88067	4.08617e-09	2.25272e-07
RP11-34A14.3	ENSG00000230928.1	antisense	161.044	0.825478	0.140457	5.87708	4.17562e-09	2.29324e-07
SMC1A	ENSG00000072501.13	protein_coding	7844.04	-0.454311	0.077436	-5.86693	4.43946e-09	2.42887e-07
SETD8	ENSG00000183955.8	protein_coding	2680.9	-0.457782	0.078059	-5.86456	4.50332e-09	2.45448e-07
MCM6	ENSG00000076003.4	protein_coding	1386.61	-0.54829	0.0935628	-5.86013	4.62512e-09	2.51135e-07
DAZAP1	ENSG00000071626.12	protein_coding	4780.69	-0.43569	0.0744795	-5.84979	4.92193e-09	2.66247e-07
SSBP2	ENSG00000145687.11	protein_coding	1193.36	0.499119	0.0853936	5.84493	5.06793e-09	2.73118e-07
UHRF1	ENSG00000034063.9	processed_transcript	2333.57	-0.523266	0.0895621	-5.84249	5.14261e-09	2.74969e-07
CCND1	ENSG00000110092.3	protein_coding	21323	-0.388293	0.0664589	-5.84261	5.13892e-09	2.74969e-07
NCAPD3	ENSG00000151503.8	protein_coding	2893.67	-0.526651	0.09015	-5.84194	5.15962e-09	2.74969e-07
EZH2	ENSG00000106462.6	protein_coding	2230.14	-0.493143	0.0847887	-5.81613	6.02242e-09	3.19766e-07
INHBB	ENSG00000163083.5	protein_coding	639.942	0.620604	0.10676	5.81306	6.13393e-09	3.2449e-07
REEP2	ENSG00000132563.11	protein_coding	937.329	0.519872	0.0894594	5.81126	6.20046e-09	3.26309e-07
DDR1	ENSG00000204580.7	protein_coding	4963.82	0.434256	0.0747313	5.8109	6.21369e-09	3.26309e-07
IGF2BP3	ENSG00000136231.9	protein_coding	2506.73	-0.503182	0.0866283	-5.80852	6.30282e-09	3.28592e-07
MYBL1	ENSG00000185697.12	protein_coding	575.31	-0.591369	0.101805	-5.80882	6.29132e-09	3.28592e-07
NLRP3	ENSG00000162711.12	protein_coding	720.302	-0.734291	0.126449	-5.80701	6.35973e-09	3.30362e-07
MTFR2	ENSG00000146410.7	protein_coding	244.122	-0.775583	0.133757	-5.79847	6.69245e-09	3.46394e-07
PHF1	ENSG00000112511.13	protein_coding	5633.38	0.466651	0.0805528	5.79311	6.90947e-09	3.56345e-07
POLQ	ENSG00000051341.9	protein_coding	292.871	-0.709647	0.122612	-5.78773	7.13433e-09	3.66628e-07
EME1	ENSG00000154920.10	protein_coding	224.469	-0.793681	0.137323	-5.77967	7.48484e-09	3.82542e-07
TK1	ENSG00000167900.7	protein_coding	3006.7	-0.633982	0.109697	-5.77939	7.49717e-09	3.82542e-07
WDR76	ENSG00000092470.7	protein_coding	429.331	-0.636576	0.110275	-5.77262	7.80491e-09	3.95439e-07
VRK1	ENSG00000100749.3	protein_coding	1255.09	-0.560077	0.0970144	-5.77313	7.78125e-09	3.95439e-07
NREP	ENSG00000134986.9	protein_coding	2801.18	0.442999	0.0767719	5.77032	7.91194e-09	3.99456e-07
ODC1	ENSG00000115758.8	protein_coding	5316.38	-0.5212	0.090494	-5.7595	8.43656e-09	4.24453e-07
NR4A3	ENSG00000119508.13	protein_coding	184.049	0.803192	0.139801	5.74525	9.17876e-09	4.60185e-07
E2F1	ENSG00000101412.9	protein_coding	1514.89	-0.610471	0.106317	-5.742	9.35621e-09	4.67453e-07
TOPBP1	ENSG00000163781.8	protein_coding	2164.96	-0.497869	0.0869276	-5.72739	1.01985e-08	5.07771e-07
GINS1	ENSG00000101003.8	protein_coding	555.104	-0.595527	0.104102	-5.72063	1.06128e-08	5.26578e-07
RP11-488P3.1	ENSG00000230439.2	sense_intronic	328.637	-0.669284	0.117171	-5.71203	1.11638e-08	5.52012e-07
LFNG	ENSG00000106003.8	protein_coding	2190.14	0.446313	0.0783616	5.69555	1.22971e-08	6.05971e-07
PTBP3	ENSG00000119314.11	protein_coding	4337.71	0.486741	0.0854997	5.6929	1.24901e-08	6.13377e-07
EIF3F	ENSG00000175390.8	protein_coding	8530.58	0.421289	0.0740371	5.69025	1.26857e-08	6.20865e-07
CLSPN	ENSG00000092853.9	protein_coding	1039.91	-0.614111	0.108077	-5.68214	1.3302e-08	6.48824e-07
MND1	ENSG00000121211.3	protein_coding	396.408	-0.746182	0.131696	-5.66594	1.46219e-08	7.10088e-07
KIF18A	ENSG00000121621.6	protein_coding	1011.76	-0.485651	0.0857202	-5.66553	1.46568e-08	7.10088e-07
CYTH4	ENSG00000100055.16	protein_coding	1754.28	0.446536	0.079013	5.65142	1.59126e-08	7.68343e-07
MRPS6	ENSG00000243927.1	protein_coding	2365.71	0.499541	0.0884101	5.65026	1.60202e-08	7.70951e-07
ERMARD	ENSG00000130023.11	protein_coding	1847.08	0.448739	0.0794301	5.64949	1.60925e-08	7.71848e-07
HS6ST1	ENSG00000136720.6	protein_coding	1539.08	0.458717	0.0812976	5.64244	1.67657e-08	8.0147e-07
EPB41L4B	ENSG00000095203.10	protein_coding	1309.42	-0.508716	0.0902362	-5.6376	1.72439e-08	8.21598e-07
DHX40	ENSG00000108406.5	protein_coding	3438.27	0.475697	0.0845463	5.62647	1.83931e-08	8.73462e-07
H2AFZ	ENSG00000164032.7	protein_coding	11270.7	-0.48717	0.0866331	-5.62337	1.87271e-08	8.86396e-07
CTIF	ENSG00000134030.9	protein_coding	1915.73	0.430256	0.076617	5.61568	1.9579e-08	9.20659e-07
FAM20C	ENSG00000177706.8	protein_coding	7040.98	0.42877	0.0763518	5.61572	1.95744e-08	9.20659e-07
TMEM154	ENSG00000170006.7	protein_coding	2664.12	-0.449552	0.080112	-5.61154	2.00529e-08	9.39872e-07
MCM4	ENSG00000104738.12	protein_coding	3905.23	-0.4945	0.0882971	-5.60042	2.13839e-08	9.99004e-07
LZTS3	ENSG00000088899.10	protein_coding	1153.91	0.471197	0.0843468	5.58642	2.31796e-08	1.07872e-06
BMP4	ENSG00000125378.11	protein_coding	9020.85	0.377922	0.0676556	5.58597	2.32403e-08	1.07872e-06
PDLIM1	ENSG00000107438.4	protein_coding	3910.16	-0.42912	0.0768835	-5.58143	2.38551e-08	1.1037e-06
RBM38	ENSG00000132819.12	protein_coding	940.803	0.534216	0.0958239	5.57498	2.4756e-08	1.14171e-06
ACAT2	ENSG00000120437.7	protein_coding	3915.94	-0.50646	0.0908673	-5.57362	2.49496e-08	1.14696e-06
SNRNP27	ENSG00000124380.6	protein_coding	819.633	0.509051	0.0914164	5.56849	2.56962e-08	1.17752e-06
SERPINA1	ENSG00000197249.8	protein_coding	1622.25	-0.486406	0.0873587	-5.56792	2.57798e-08	1.1776e-06
SERPINE2	ENSG00000135919.8	protein_coding	18141.3	0.493215	0.0886364	5.56448	2.62938e-08	1.19728e-06
H2AFV	ENSG00000105968.14	protein_coding	6001.42	-0.40414	0.0728381	-5.54846	2.88193e-08	1.30814e-06
TNFSF18	ENSG00000120337.7	protein_coding	133.594	-0.889128	0.160385	-5.54371	2.96122e-08	1.33991e-06
MFSD6	ENSG00000151690.10	protein_coding	2393.44	0.455501	0.0822434	5.53845	3.05166e-08	1.3765e-06
RFC4	ENSG00000163918.6	protein_coding	1149.49	-0.597057	0.107891	-5.53388	3.13222e-08	1.40842e-06
LIPH	ENSG00000163898.5	protein_coding	1600.66	-0.46511	0.0840643	-5.53279	3.15186e-08	1.41284e-06
TNFSF15	ENSG00000181634.7	protein_coding	5170.08	-0.485572	0.0877955	-5.53072	3.18927e-08	1.42517e-06
LRRCC1	ENSG00000133739.11	protein_coding	433.329	-0.595548	0.108258	-5.50118	3.77268e-08	1.68066e-06
ATP11C	ENSG00000101974.10	protein_coding	1795.38	0.523827	0.0952536	5.49928	3.81337e-08	1.69354e-06
DAP3	ENSG00000132676.11	protein_coding	4067.89	0.384916	0.0700363	5.49596	3.88595e-08	1.72046e-06
EPB41L2	ENSG00000079819.12	protein_coding	5835.13	-0.373223	0.0680073	-5.48799	4.06544e-08	1.7944e-06
HMHA1	ENSG00000180448.6	protein_coding	3225.85	0.412794	0.0753819	5.47604	4.34961e-08	1.91396e-06
MMS22L	ENSG00000146263.7	protein_coding	613.537	-0.575701	0.10523	-5.4709	4.47754e-08	1.96425e-06
SLC22A4	ENSG00000197208.5	protein_coding	559.857	0.53524	0.0980251	5.46024	4.7549e-08	2.07958e-06
RAD51	ENSG00000051180.12	protein_coding	442.128	-0.621546	0.113897	-5.45708	4.84023e-08	2.11049e-06
APAF1	ENSG00000120868.9	protein_coding	2540.05	-0.442452	0.0811403	-5.45292	4.95482e-08	2.15392e-06
SHISA5	ENSG00000164054.11	protein_coding	8389.68	0.383567	0.0703854	5.44953	5.0502e-08	2.18877e-06
SEMA4F	ENSG00000135622.8	protein_coding	787.127	0.505803	0.0929736	5.44028	5.31957e-08	2.2986e-06
SLC7A1	ENSG00000139514.8	protein_coding	6116.27	-0.376859	0.0693496	-5.4342	5.50433e-08	2.37131e-06
TMEM41A	ENSG00000163900.6	protein_coding	1253.82	0.44526	0.0821212	5.42199	5.89407e-08	2.53163e-06
THBS1	ENSG00000137801.9	protein_coding	14527.3	-0.410646	0.0758381	-5.41477	6.13666e-08	2.62799e-06
CYB5R4	ENSG00000065615.9	protein_coding	1760.09	0.518369	0.0958069	5.41056	6.28286e-08	2.68261e-06
BDNF	ENSG00000176697.14	protein_coding	785.61	0.519272	0.0960037	5.40887	6.34232e-08	2.69999e-06
IARS	ENSG00000196305.13	protein_coding	11256.4	-0.353699	0.0654432	-5.40467	6.49276e-08	2.75588e-06
LRP8	ENSG00000157193.10	protein_coding	1963.63	-0.415614	0.0769303	-5.40248	6.57273e-08	2.78162e-06
PLEKHA4	ENSG00000105559.7	protein_coding	1099.49	0.48107	0.0890764	5.40064	6.64034e-08	2.80199e-06
PCNA	ENSG00000132646.6	protein_coding	4501.12	-0.538288	0.0997349	-5.39719	6.76937e-08	2.84808e-06
TIMELESS	ENSG00000111602.7	protein_coding	1877.63	-0.505532	0.0937043	-5.39497	6.85342e-08	2.87504e-06
KIAA0586	ENSG00000100578.10	protein_coding	2319.45	-0.410672	0.0761493	-5.39299	6.92943e-08	2.89848e-06
KIF22	ENSG00000079616.8	protein_coding	2864.59	-0.517422	0.0961119	-5.38353	7.30372e-08	3.04618e-06
POLR3E	ENSG00000058600.11	protein_coding	1629.04	0.431815	0.0804726	5.36598	8.05087e-08	3.34809e-06
WNT7B	ENSG00000188064.5	protein_coding	1717.56	0.439257	0.0819726	5.35858	8.38781e-08	3.47816e-06
MTHFR	ENSG00000177000.6	protein_coding	2032.08	0.449954	0.0839779	5.358	8.41496e-08	3.47939e-06
FAM111B	ENSG00000189057.6	protein_coding	885.061	-0.530045	0.0990025	-5.35386	8.60995e-08	3.54982e-06
PRTFDC1	ENSG00000099256.14	protein_coding	454.687	-0.561606	0.104971	-5.35009	8.79104e-08	3.61412e-06
TICRR	ENSG00000140534.9	protein_coding	716.854	-0.556454	0.104193	-5.34059	9.26435e-08	3.79786e-06
RTF1	ENSG00000137815.10	protein_coding	3502.22	0.384436	0.0719951	5.33974	9.3079e-08	3.80487e-06
FIGNL1	ENSG00000132436.7	protein_coding	776.704	-0.50668	0.0949471	-5.33644	9.47881e-08	3.86376e-06
SASS6	ENSG00000156876.8	protein_coding	471.012	-0.608749	0.114099	-5.33527	9.54031e-08	3.87784e-06
ICMT	ENSG00000116237.11	protein_coding	5366.57	0.378478	0.070984	5.33188	9.72018e-08	3.93982e-06
ZNF558	ENSG00000167785.4	protein_coding	2766.45	0.430902	0.0808561	5.32925	9.86211e-08	3.98612e-06
AP2B1	ENSG00000006125.12	protein_coding	39372.9	-0.353627	0.0663733	-5.32785	9.93846e-08	4.00573e-06
MUC5AC	ENSG00000215182.6	protein_coding	841.57	0.643931	0.121093	5.31765	1.05116e-07	4.22489e-06
COL4A2	ENSG00000134871.13	protein_coding	9603.91	-0.404271	0.0760664	-5.31471	1.06828e-07	4.26985e-06
NT5E	ENSG00000135318.7	protein_coding	43107.1	-0.427789	0.0804866	-5.31504	1.06635e-07	4.26985e-06
DDI2	ENSG00000197312.7	protein_coding	1762.4	-0.464059	0.0876235	-5.29606	1.18328e-07	4.7164e-06
SH3D21	ENSG00000214193.5	protein_coding	1274.52	0.42775	0.0808045	5.29364	1.19906e-07	4.76609e-06
UBE2T	ENSG00000077152.5	protein_coding	1476.22	-0.589089	0.111447	-5.28582	1.25145e-07	4.96065e-06
TBL1X	ENSG00000101849.11	protein_coding	1887.42	-0.480901	0.0910476	-5.28186	1.27878e-07	5.05505e-06
POLA2	ENSG00000014138.4	protein_coding	576.877	-0.565049	0.107059	-5.27793	1.3065e-07	5.15046e-06
GRAMD4	ENSG00000075240.12	protein_coding	1151.92	0.44321	0.0840619	5.27243	1.34632e-07	5.29296e-06
MED28	ENSG00000118579.7	protein_coding	2165.29	0.420883	0.079854	5.27066	1.35935e-07	5.32961e-06
GPR116	ENSG00000069122.14	protein_coding	34120.9	-0.392969	0.0745978	-5.26784	1.38041e-07	5.37381e-06
SPTLC1	ENSG00000090054.9	protein_coding	3118.2	0.377194	0.0716058	5.26765	1.38183e-07	5.37381e-06
TUBA1B	ENSG00000123416.11	protein_coding	11520.5	-0.464005	0.0880811	-5.26793	1.37974e-07	5.37381e-06
CLIC4	ENSG00000169504.10	protein_coding	26201.9	0.456822	0.086763	5.26518	1.40055e-07	5.43193e-06
ZWILCH	ENSG00000174442.7	protein_coding	893.503	-0.524852	0.0997116	-5.26369	1.4119e-07	5.46123e-06
WHSC1	ENSG00000109685.13	protein_coding	11308.9	-0.402196	0.0764772	-5.25904	1.44813e-07	5.58637e-06
SEZ6L2	ENSG00000174938.10	protein_coding	6573.6	0.387047	0.0737086	5.25104	1.51242e-07	5.81877e-06
NAV3	ENSG00000067798.9	protein_coding	2789.82	-0.463018	0.0882298	-5.24786	1.53879e-07	5.90444e-06
ANO10	ENSG00000160746.8	protein_coding	2743.48	0.483183	0.0920832	5.24724	1.54393e-07	5.90843e-06
SAPCD2	ENSG00000186193.7	protein_coding	1077.86	-0.5579	0.106621	-5.23256	1.67177e-07	6.38067e-06
MCM2	ENSG00000073111.9	protein_coding	2116.39	-0.51807	0.099055	-5.23012	1.69401e-07	6.44844e-06
RN7SL2	ENSG00000265150.1	misc_RNA	399.705	0.741169	0.141838	5.22546	1.73727e-07	6.59566e-06
FDFT1	ENSG00000079459.8	protein_coding	6636.35	-0.414019	0.079243	-5.22468	1.74459e-07	6.60603e-06
ARL6IP1	ENSG00000170540.10	protein_coding	6304.05	-0.380273	0.0729229	-5.21473	1.84086e-07	6.93777e-06
ENPP1	ENSG00000197594.7	protein_coding	12380.3	-0.373464	0.0716185	-5.21463	1.84184e-07	6.93777e-06
SLC29A4	ENSG00000164638.6	protein_coding	288.916	0.633684	0.121922	5.19744	2.02052e-07	7.59093e-06
NKIRAS1	ENSG00000197885.6	protein_coding	899.024	-0.4953	0.0953907	-5.19232	2.07685e-07	7.78223e-06
FTSJ1	ENSG00000068438.10	protein_coding	3129.19	0.374996	0.072229	5.19177	2.08309e-07	7.78534e-06
SLC45A4	ENSG00000022567.5	protein_coding	1095.03	0.513486	0.098915	5.19118	2.08961e-07	7.78948e-06
GDF11	ENSG00000135414.5	protein_coding	531.868	0.54567	0.105133	5.19025	2.10006e-07	7.80822e-06
CADM4	ENSG00000105767.2	protein_coding	599.465	0.504003	0.0971311	5.18889	2.11548e-07	7.84529e-06
KLHL4	ENSG00000102271.9	protein_coding	2803.2	-0.390489	0.0752947	-5.18615	2.14685e-07	7.94114e-06
SCML1	ENSG00000047634.10	protein_coding	940.53	-0.484391	0.0936639	-5.17158	2.32117e-07	8.54203e-06
GSG2	ENSG00000177602.4	protein_coding	350.504	-0.682982	0.132055	-5.17194	2.31675e-07	8.54203e-06
ZDHHC20	ENSG00000180776.11	protein_coding	1153.07	0.506784	0.0980537	5.16843	2.36069e-07	8.66531e-06
AQP5	ENSG00000161798.6	protein_coding	98.531	0.80577	0.155941	5.16713	2.37712e-07	8.70339e-06
RBBP8	ENSG00000101773.12	protein_coding	2487.28	-0.459736	0.0890999	-5.15978	2.47241e-07	9.00645e-06
PRDM8	ENSG00000152784.11	protein_coding	2784.7	-0.397754	0.0770858	-5.15989	2.47094e-07	9.00645e-06
TRIP13	ENSG00000071539.9	protein_coding	606.44	-0.569849	0.110471	-5.15836	2.49116e-07	9.05186e-06
TRAIP	ENSG00000183763.4	protein_coding	435.453	-0.606323	0.117595	-5.15604	2.52226e-07	9.14176e-06
LAMTOR3	ENSG00000109270.8	protein_coding	1280.47	0.48393	0.0939416	5.15139	2.5856e-07	9.34778e-06
ERBB3	ENSG00000065361.10	protein_coding	524.02	0.515996	0.100353	5.14179	2.72128e-07	9.81366e-06
PLXNB2	ENSG00000196576.10	protein_coding	12372.3	0.352557	0.0686702	5.13405	2.83566e-07	1.01751e-05
TMPO-AS1	ENSG00000257167.2	antisense	130.219	-0.789091	0.153695	-5.13415	2.83424e-07	1.01751e-05
ATF2	ENSG00000115966.12	protein_coding	2012.17	0.445714	0.0870148	5.12228	3.0187e-07	1.0805e-05
WEE1	ENSG00000166483.6	protein_coding	2074.72	-0.382515	0.0747453	-5.11758	3.09484e-07	1.105e-05
DBF4	ENSG00000006634.3	protein_coding	756.613	-0.490224	0.0958329	-5.11541	3.13062e-07	1.11501e-05
SNX21	ENSG00000124104.14	protein_coding	2098	0.391078	0.076522	5.11065	3.21046e-07	1.14062e-05
AMY2B	ENSG00000240038.2	protein_coding	702.879	0.537922	0.105269	5.10995	3.22239e-07	1.14204e-05
HNRNPR	ENSG00000125944.14	protein_coding	9408.32	-0.377975	0.0743041	-5.08687	3.64029e-07	1.28698e-05
C17orf103	ENSG00000154035.6	protein_coding	1517.84	0.436578	0.0858364	5.08617	3.65373e-07	1.28857e-05
RAD51AP1	ENSG00000111247.10	protein_coding	501.302	-0.620428	0.12208	-5.08215	3.7319e-07	1.31292e-05
KIFC3	ENSG00000140859.11	protein_coding	7979.31	-0.376605	0.0741233	-5.0808	3.75857e-07	1.31907e-05
CHAF1A	ENSG00000167670.11	protein_coding	1383.73	-0.506581	0.0998656	-5.07263	3.92365e-07	1.37366e-05
LMCD1	ENSG00000071282.7	protein_coding	275.914	-0.672842	0.13279	-5.06697	4.0419e-07	1.41162e-05
HAT1	ENSG00000128708.8	protein_coding	1784.43	-0.461776	0.0913162	-5.05689	4.2615e-07	1.48113e-05
ACLY	ENSG00000131473.12	protein_coding	28230.2	-0.360559	0.0712981	-5.05707	4.2575e-07	1.48113e-05
TCN1	ENSG00000134827.3	protein_coding	897.403	-0.51317	0.101651	-5.04834	4.45665e-07	1.54522e-05
TFAP2C	ENSG00000087510.5	protein_coding	3353.67	0.413546	0.0820772	5.0385	4.69206e-07	1.62293e-05
C1R	ENSG00000159403.11	protein_coding	2977.87	0.490308	0.0973643	5.03581	4.75836e-07	1.64192e-05
GFPT2	ENSG00000131459.8	protein_coding	7662.57	-0.369431	0.0734112	-5.03235	4.84497e-07	1.66781e-05
PGRMC2	ENSG00000164040.12	protein_coding	3314.71	0.402162	0.0799841	5.02802	4.95562e-07	1.70182e-05
SPC24	ENSG00000161888.7	protein_coding	585.2	-0.583828	0.116254	-5.02201	5.1134e-07	1.75183e-05
PTPRU	ENSG00000060656.15	protein_coding	8994.56	0.353665	0.0704998	5.01654	5.26117e-07	1.79817e-05
ARHGEF4	ENSG00000136002.12	protein_coding	1671.28	0.396792	0.07912	5.01507	5.30145e-07	1.80764e-05
SLC25A29	ENSG00000197119.8	protein_coding	4179.22	0.378404	0.0754871	5.01282	5.36379e-07	1.82458e-05
ATE1	ENSG00000107669.13	protein_coding	1752.57	0.415448	0.0828891	5.0121	5.38402e-07	1.82714e-05
ZDHHC1	ENSG00000159714.6	protein_coding	729.25	0.480578	0.0959372	5.0093	5.46283e-07	1.84952e-05
SEMA7A	ENSG00000138623.5	protein_coding	2184.91	-0.460342	0.0919937	-5.00406	5.61362e-07	1.89611e-05
TNC	ENSG00000041982.10	protein_coding	13205	0.421363	0.0842766	4.99977	5.73991e-07	1.93423e-05
H2AFX	ENSG00000188486.3	protein_coding	2579.37	-0.508766	0.101772	-4.99908	5.76048e-07	1.93663e-05
PPP1R9A	ENSG00000158528.7	protein_coding	870.723	0.54128	0.108294	4.99823	5.78587e-07	1.94063e-05
CHPF	ENSG00000123989.9	protein_coding	6257.52	0.775894	0.15534	4.9948	5.88957e-07	1.97082e-05
FANCA	ENSG00000187741.10	protein_coding	1077.82	-0.535664	0.10732	-4.99129	5.99777e-07	2.00236e-05
MED15	ENSG00000099917.13	protein_coding	3935.79	0.37015	0.0741711	4.99048	6.0228e-07	2.00607e-05
SNX9	ENSG00000130340.10	protein_coding	5497.71	-0.338996	0.0679674	-4.98763	6.11243e-07	2.03122e-05
NGFR	ENSG00000064300.4	protein_coding	416.075	0.622947	0.124942	4.9859	6.16752e-07	2.0448e-05
GSTCD	ENSG00000138780.10	protein_coding	600.516	-0.518678	0.104143	-4.98043	6.34418e-07	2.09652e-05
CENPJ	ENSG00000151849.10	protein_coding	722.794	-0.515663	0.103543	-4.98018	6.35266e-07	2.09652e-05
WNK4	ENSG00000126562.12	protein_coding	169.258	-0.713046	0.143249	-4.97768	6.43519e-07	2.1189e-05
RP4-758J24.5	ENSG00000272091.1	lincRNA	202.385	0.752819	0.151431	4.97138	6.64782e-07	2.18391e-05
ANKRD46	ENSG00000186106.7	protein_coding	664.063	0.470457	0.0947191	4.96687	6.80416e-07	2.23018e-05
IZUMO4	ENSG00000099840.9	protein_coding	841.856	0.576077	0.116106	4.96166	6.98937e-07	2.28568e-05
ZSWIM8	ENSG00000214655.6	protein_coding	5270.66	0.353639	0.0714651	4.94841	7.48208e-07	2.44126e-05
MAVS	ENSG00000088888.13	protein_coding	5312.07	0.387711	0.0785921	4.9332	8.08921e-07	2.62862e-05
CHST15	ENSG00000182022.13	protein_coding	15833.2	0.35169	0.0712917	4.93312	8.09284e-07	2.62862e-05
CDKN2C	ENSG00000123080.6	protein_coding	1881.18	-0.493255	0.100006	-4.93223	8.12957e-07	2.6346e-05
PLEKHM1	ENSG00000225190.4	protein_coding	1853.68	0.401455	0.0814831	4.92686	8.35622e-07	2.70197e-05
HERPUD2	ENSG00000122557.5	protein_coding	1057.44	0.433127	0.0879512	4.92462	8.4523e-07	2.72691e-05
ZFYVE9	ENSG00000157077.10	protein_coding	1564.67	0.419185	0.0851932	4.9204	8.63669e-07	2.77396e-05
TMEM184B	ENSG00000198792.8	protein_coding	4882.5	0.388459	0.0789468	4.92052	8.63136e-07	2.77396e-05
PHF19	ENSG00000119403.9	protein_coding	3887.92	-0.448965	0.0913718	-4.9136	8.94185e-07	2.86557e-05
CDT1	ENSG00000167513.4	protein_coding	676.283	-0.570045	0.116053	-4.91193	9.01863e-07	2.88376e-05
CTNNAL1	ENSG00000119326.10	protein_coding	3927.35	-0.374875	0.0764057	-4.90638	9.27746e-07	2.95994e-05
CXCL10	ENSG00000169245.4	protein_coding	466.115	0.533786	0.108946	4.89956	9.60504e-07	3.05768e-05
DBF4B	ENSG00000161692.13	protein_coding	874.524	-0.534426	0.109094	-4.89876	9.64432e-07	3.0634e-05
RAPGEF3	ENSG00000079337.11	protein_coding	744.655	0.466462	0.0953009	4.89463	9.84929e-07	3.12162e-05
NDUFA5	ENSG00000128609.10	protein_coding	1349.8	0.420794	0.0860197	4.89183	9.99007e-07	3.15928e-05
PRIM1	ENSG00000198056.9	protein_coding	272.803	-0.657141	0.134423	-4.88862	1.01546e-06	3.20427e-05
SKP2	ENSG00000145604.11	protein_coding	563.58	-0.578853	0.118458	-4.88658	1.02602e-06	3.2305e-05
PTX3	ENSG00000163661.3	protein_coding	6704.35	-0.367467	0.0752285	-4.88468	1.03596e-06	3.25469e-05
PJA2	ENSG00000198961.5	protein_coding	11055.3	0.427736	0.087594	4.88317	1.04396e-06	3.27266e-05
LY6E	ENSG00000160932.6	protein_coding	10011.8	0.4663	0.0955705	4.87912	1.06559e-06	3.33322e-05
PGF	ENSG00000119630.9	protein_coding	3443.57	0.48993	0.100428	4.87842	1.06937e-06	3.33777e-05
C1orf112	ENSG00000000460.12	protein_coding	731.231	-0.521722	0.10696	-4.87772	1.07318e-06	3.34242e-05
B3GNT1	ENSG00000174684.6	protein_coding	2302.97	0.429117	0.0880023	4.8762	1.0815e-06	3.36105e-05
NFYA	ENSG00000001167.10	protein_coding	6815.96	0.366638	0.0753117	4.86827	1.1258e-06	3.49119e-05
SVIP	ENSG00000198168.4	protein_coding	1032.43	-0.471999	0.0970118	-4.86538	1.14239e-06	3.53503e-05
COL6A2	ENSG00000142173.10	protein_coding	3782.84	0.429202	0.0882587	4.86301	1.15617e-06	3.56863e-05
CKAP5	ENSG00000175216.10	protein_coding	13096.6	-0.352706	0.0725336	-4.86266	1.15821e-06	3.56863e-05
G3BP2	ENSG00000138757.10	protein_coding	13926.1	0.363728	0.0748206	4.86133	1.16599e-06	3.58493e-05
SUV39H1	ENSG00000101945.12	protein_coding	450.124	-0.539144	0.110937	-4.85992	1.17435e-06	3.60293e-05
STARD8	ENSG00000130052.9	protein_coding	1000.04	-0.469646	0.0966737	-4.85805	1.18548e-06	3.62933e-05
GMNN	ENSG00000112312.5	protein_coding	2094.21	-0.517706	0.106638	-4.85478	1.2052e-06	3.68187e-05
GPR126	ENSG00000112414.10	protein_coding	1470.68	-0.413933	0.0855409	-4.839	1.30494e-06	3.97812e-05
DNAJB6	ENSG00000105993.10	protein_coding	16886.2	-0.33361	0.0689875	-4.8358	1.32611e-06	4.02563e-05
RIT1	ENSG00000143622.6	protein_coding	2179.97	0.385063	0.0796272	4.83583	1.32592e-06	4.02563e-05
ABCC3	ENSG00000108846.11	protein_coding	6578.74	0.343556	0.0710869	4.8329	1.34559e-06	4.07564e-05
IL6	ENSG00000136244.7	protein_coding	3280.62	-0.454962	0.0941612	-4.83173	1.35352e-06	4.07564e-05
CREG1	ENSG00000143162.7	protein_coding	3732.54	-0.400367	0.0828566	-4.83205	1.35138e-06	4.07564e-05
ANGPT1	ENSG00000154188.5	protein_coding	303.852	0.61582	0.127455	4.83167	1.35392e-06	4.07564e-05
DHCR7	ENSG00000172893.11	protein_coding	11672.5	-0.366234	0.0758563	-4.828	1.37914e-06	4.14288e-05
TBC1D31	ENSG00000156787.12	protein_coding	588.575	-0.572749	0.118668	-4.82647	1.38972e-06	4.16597e-05
HSD17B12	ENSG00000149084.7	protein_coding	3257.41	-0.340291	0.0705433	-4.82386	1.40804e-06	4.21211e-05
HIP1	ENSG00000127946.12	protein_coding	690.639	0.55382	0.114841	4.8225	1.41769e-06	4.23217e-05
GPR110	ENSG00000153292.11	protein_coding	2975.51	-0.370481	0.0768579	-4.82034	1.43314e-06	4.26944e-05
ANXA10	ENSG00000109511.6	protein_coding	497.277	-0.517197	0.107307	-4.81977	1.43725e-06	4.27286e-05
CCDC149	ENSG00000181982.13	protein_coding	764.662	0.457541	0.0949612	4.81819	1.44867e-06	4.29793e-05
MTBP	ENSG00000172167.3	protein_coding	636.876	-0.547868	0.113749	-4.81645	1.46134e-06	4.3266e-05
GNB1	ENSG00000078369.13	protein_coding	25926.5	0.346555	0.0719804	4.81457	1.47517e-06	4.34964e-05
AMOTL2	ENSG00000114019.10	protein_coding	1854.2	-0.40751	0.0846344	-4.81495	1.47239e-06	4.34964e-05
MAP7D3	ENSG00000129680.11	protein_coding	2438.09	-0.379122	0.0788105	-4.81055	1.50516e-06	4.429e-05
PBX3	ENSG00000167081.12	protein_coding	782.918	-0.450683	0.0937543	-4.80707	1.5316e-06	4.49758e-05
ACTB	ENSG00000075624.9	protein_coding	100201	-0.32405	0.0674386	-4.80511	1.54668e-06	4.53149e-05
FGFRL1	ENSG00000127418.10	protein_coding	6726.37	0.381369	0.0793733	4.80475	1.54944e-06	4.53149e-05
UST	ENSG00000111962.7	protein_coding	812.144	0.431702	0.0899106	4.80146	1.57517e-06	4.59737e-05
GOPC	ENSG00000047932.9	protein_coding	2019.33	0.388513	0.0809721	4.79811	1.6017e-06	4.66536e-05
SLC9A3R1	ENSG00000109062.5	protein_coding	7280.15	-0.47604	0.0992608	-4.79585	1.61988e-06	4.70877e-05
GPATCH4	ENSG00000160818.12	protein_coding	1963.59	-0.379182	0.0791933	-4.78806	1.68402e-06	4.88536e-05
E2F8	ENSG00000129173.8	protein_coding	389.116	-0.60197	0.125797	-4.78525	1.70777e-06	4.94428e-05
MCTP1	ENSG00000175471.15	protein_coding	4127.2	-0.345224	0.0721887	-4.78224	1.73351e-06	5.00872e-05
TTF2	ENSG00000116830.7	protein_coding	1086.98	-0.446149	0.0935262	-4.77031	1.8394e-06	5.30404e-05
PKP4	ENSG00000144283.17	protein_coding	3326.76	-0.365107	0.0765699	-4.76829	1.85795e-06	5.34682e-05
AQP3	ENSG00000165272.10	protein_coding	1744.31	0.392337	0.0823122	4.76645	1.87498e-06	5.38505e-05
MBNL1	ENSG00000152601.13	protein_coding	7407.15	-0.330593	0.0694702	-4.75877	1.94778e-06	5.58299e-05
AHNAK2	ENSG00000185567.6	protein_coding	13994.2	0.377836	0.079607	4.74626	2.07212e-06	5.92758e-05
CENPM	ENSG00000100162.10	protein_coding	408.745	-0.615806	0.129853	-4.74234	2.11259e-06	6.03137e-05
TBKBP1	ENSG00000198933.5	protein_coding	509.497	0.479622	0.101215	4.73866	2.1514e-06	6.13001e-05
PKP3	ENSG00000184363.5	protein_coding	1771.23	0.44418	0.0937966	4.73557	2.18445e-06	6.19174e-05
IFITM10	ENSG00000244242.1	protein_coding	644.825	0.461882	0.0975234	4.73611	2.17855e-06	6.19174e-05
ZNF850	ENSG00000267041.1	protein_coding	295.05	-0.583608	0.123243	-4.73542	2.18598e-06	6.19174e-05
KIAA0100	ENSG00000007202.10	protein_coding	15489.5	0.359894	0.0760261	4.73383	2.20323e-06	6.22834e-05
IAH1	ENSG00000134330.14	protein_coding	1553.99	0.403126	0.0852584	4.72828	2.26428e-06	6.38782e-05
MSN	ENSG00000147065.12	protein_coding	78878.9	-0.317678	0.0671921	-4.7279	2.26852e-06	6.38782e-05
CHEK1	ENSG00000149554.8	protein_coding	1984.46	-0.362758	0.0768004	-4.72339	2.31944e-06	6.51844e-05
DSCC1	ENSG00000136982.5	protein_coding	331.021	-0.620997	0.131829	-4.71061	2.46978e-06	6.92743e-05
TRIM6	ENSG00000121236.15	protein_coding	128.024	-0.698366	0.148453	-4.7043	2.54744e-06	7.13134e-05
ARHGDIB	ENSG00000111348.4	protein_coding	6621.17	-0.436675	0.0928479	-4.70312	2.56218e-06	7.14481e-05
A2M	ENSG00000175899.10	protein_coding	1630.85	0.413708	0.0879584	4.70346	2.55794e-06	7.14481e-05
CBX3	ENSG00000122565.14	protein_coding	7741.27	-0.368397	0.0784683	-4.69485	2.66797e-06	7.42542e-05
SERPINB2	ENSG00000197632.4	protein_coding	137.121	-0.767582	0.163585	-4.69224	2.70234e-06	7.50657e-05
XRCC2	ENSG00000196584.2	protein_coding	387.391	-0.583983	0.124473	-4.69166	2.70992e-06	7.51311e-05
MAP2K3	ENSG00000034152.14	protein_coding	2572.21	-0.347386	0.0741532	-4.6847	2.8037e-06	7.75817e-05
ATP1B3	ENSG00000069849.6	protein_coding	4283.91	-0.321572	0.0687711	-4.67597	2.92565e-06	8.08007e-05
ORC6	ENSG00000091651.4	protein_coding	578.799	-0.505455	0.108123	-4.6748	2.94243e-06	8.11085e-05
CEP78	ENSG00000148019.8	protein_coding	1077.86	-0.412713	0.0883768	-4.66993	3.01305e-06	8.28963e-05
ABCA2	ENSG00000107331.12	protein_coding	5413.85	0.329966	0.070701	4.66706	3.05543e-06	8.39019e-05
FAM129A	ENSG00000135842.12	protein_coding	4170.82	-0.36871	0.0790353	-4.66513	3.08416e-06	8.45295e-05
EXD3	ENSG00000187609.11	protein_coding	1080.34	0.405395	0.0869111	4.66447	3.09407e-06	8.464e-05
LBP	ENSG00000129988.5	protein_coding	2942.65	0.450059	0.0969071	4.64423	3.41343e-06	9.28465e-05
MATN2	ENSG00000132561.9	protein_coding	562.7	0.493179	0.106189	4.64436	3.41136e-06	9.28465e-05
RP11-221J22.2	ENSG00000241280.1	lincRNA	33.6362	-0.786318	0.169301	-4.6445	3.40906e-06	9.28465e-05
ERAP1	ENSG00000164307.8	protein_coding	4996.76	-0.311123	0.067028	-4.64168	3.45584e-06	9.38229e-05
LAPTM5	ENSG00000162511.7	protein_coding	8229.79	-0.348446	0.0752374	-4.63129	3.63401e-06	9.84743e-05
RASGRF1	ENSG00000058335.11	protein_coding	239.699	-0.600071	0.129589	-4.63058	3.64651e-06	9.86272e-05
CENPK	ENSG00000123219.8	protein_coding	416.37	-0.568863	0.122932	-4.62746	3.70173e-06	9.99328e-05
FAIM3	ENSG00000162894.7	protein_coding	234.226	-0.576812	0.124677	-4.62646	3.71967e-06	0.000100229
EPHB6	ENSG00000106123.7	protein_coding	62.8988	-0.781525	0.168993	-4.62459	3.7534e-06	0.000100761
CAMLG	ENSG00000164615.3	protein_coding	2273.48	0.411653	0.0890129	4.62465	3.75232e-06	0.000100761
TSPAN15	ENSG00000099282.5	protein_coding	2107.84	-0.447894	0.096982	-4.61832	3.86862e-06	0.000103468
DOCK6	ENSG00000130158.9	protein_coding	4023.6	0.33043	0.071546	4.61842	3.86672e-06	0.000103468
APOL6	ENSG00000221963.5	protein_coding	1531.83	-0.390996	0.0847856	-4.61159	3.99604e-06	0.000106677
SLC41A3	ENSG00000114544.11	protein_coding	2480.71	0.344649	0.0748226	4.60622	4.10062e-06	0.000109266
HIST1H2AC	ENSG00000180573.8	protein_coding	3808.86	0.391285	0.0852934	4.58751	4.48559e-06	0.000119303
ST5	ENSG00000166444.13	protein_coding	1847.07	0.390918	0.0852676	4.5846	4.54867e-06	0.000120758
CP	ENSG00000047457.9	protein_coding	1081.36	0.431956	0.0942498	4.5831	4.5813e-06	0.0001214
STMN3	ENSG00000197457.5	protein_coding	1448.97	0.441119	0.0962626	4.58246	4.59542e-06	0.00012155
AC005077.14	ENSG00000230882.1	pseudogene	796.543	-0.459289	0.100435	-4.573	4.80793e-06	0.000126938
NBEAL1	ENSG00000144426.14	protein_coding	962.882	0.462243	0.101143	4.57021	4.8724e-06	0.000128405
AMD1	ENSG00000123505.10	protein_coding	3702.55	-0.33338	0.0729898	-4.56749	4.93606e-06	0.000129662
APCDD1L	ENSG00000198768.6	protein_coding	3130.92	0.411427	0.090079	4.5674	4.93814e-06	0.000129662
DSN1	ENSG00000149636.11	protein_coding	1482.81	-0.379629	0.0831685	-4.56458	5.0049e-06	0.000131176
CNTNAP1	ENSG00000108797.7	protein_coding	4021.96	0.386575	0.0847213	4.56291	5.04505e-06	0.000131988
FAM211A	ENSG00000181350.7	protein_coding	287.121	0.538754	0.118229	4.55687	5.19214e-06	0.000135589
ANP32B	ENSG00000136938.8	protein_coding	7538.04	-0.327241	0.071903	-4.55114	5.33554e-06	0.000139082
ETNK2	ENSG00000143845.10	protein_coding	734.596	0.460357	0.101175	4.55013	5.36125e-06	0.000139499
IDI1	ENSG00000067064.6	protein_coding	5618.81	-0.357773	0.078659	-4.54841	5.4053e-06	0.000140391
KCNS3	ENSG00000170745.7	protein_coding	911.578	0.446911	0.0983627	4.5435	5.5328e-06	0.000143444
C17orf70	ENSG00000185504.12	protein_coding	2865.65	0.332983	0.0733548	4.53935	5.64287e-06	0.000146035
C17orf53	ENSG00000125319.10	protein_coding	355.122	-0.550205	0.121256	-4.53753	5.69173e-06	0.000147035
RAD54L	ENSG00000085999.7	protein_coding	482.036	-0.560334	0.12353	-4.536	5.73315e-06	0.000147546
PPM1A	ENSG00000100614.13	protein_coding	3432.04	0.407269	0.0897919	4.5357	5.7414e-06	0.000147546
HAS3	ENSG00000103044.6	protein_coding	749.535	0.485191	0.106972	4.53566	5.7423e-06	0.000147546
NIPAL1	ENSG00000163293.7	protein_coding	389.741	-0.575511	0.126928	-4.53417	5.7831e-06	0.00014833
ATP10D	ENSG00000145246.9	protein_coding	3526.78	-0.341492	0.0753264	-4.53349	5.80157e-06	0.000148539
XAGE1C	ENSG00000183461.12	protein_coding	34.2391	-0.714507	0.15764	-4.53252	5.8285e-06	0.000148963
PWWP2B	ENSG00000171813.10	protein_coding	873.427	0.491584	0.108497	4.53087	5.87412e-06	0.000149863
NUS1	ENSG00000153989.7	protein_coding	3543.45	-0.320809	0.0708559	-4.52762	5.96517e-06	0.000151648
D2HGDH	ENSG00000180902.12	protein_coding	661.171	0.457337	0.101009	4.52769	5.96314e-06	0.000151648
SHMT1	ENSG00000176974.13	protein_coding	1226.73	-0.430061	0.0950144	-4.52627	6.00334e-06	0.000152349
NINL	ENSG00000101004.10	protein_coding	1246	0.421249	0.0931146	4.52399	6.06851e-06	0.000153732
SAE1	ENSG00000142230.7	protein_coding	7900.92	-0.38881	0.0860221	-4.51988	6.18744e-06	0.000156469
TMEM50B	ENSG00000142188.12	protein_coding	1041.49	0.435387	0.0963578	4.51844	6.22967e-06	0.000157261
PPL	ENSG00000118898.11	protein_coding	870.497	0.434894	0.0962998	4.51604	6.30074e-06	0.000158776
UHMK1	ENSG00000152332.11	protein_coding	6894.25	0.377828	0.0837584	4.51092	6.45459e-06	0.000162369
RFWD3	ENSG00000168411.9	protein_coding	2898.29	-0.352576	0.0782438	-4.50612	6.60243e-06	0.000165798
DKC1	ENSG00000130826.11	protein_coding	4466.95	-0.347845	0.0772223	-4.50447	6.65396e-06	0.000166801
PPFIA4	ENSG00000143847.11	protein_coding	3188.9	0.343101	0.0762474	4.49984	6.80042e-06	0.000170054
SALL2	ENSG00000165821.7	protein_coding	598.816	0.452129	0.100481	4.49962	6.80737e-06	0.000170054
MCM5	ENSG00000100297.11	protein_coding	2214.02	-0.451066	0.100265	-4.49873	6.836e-06	0.000170474
ARHGAP19	ENSG00000213390.6	protein_coding	698.71	-0.482564	0.107361	-4.49479	6.96398e-06	0.000173365
RNF168	ENSG00000163961.4	protein_coding	2544.71	-0.364225	0.0811147	-4.49025	7.1141e-06	0.000176796
GPR153	ENSG00000158292.6	protein_coding	4182.15	0.344176	0.0767045	4.48704	7.22202e-06	0.000179168
BCAT2	ENSG00000105552.10	protein_coding	2173.53	0.413342	0.0921826	4.48395	7.32739e-06	0.000181447
GFAP	ENSG00000131095.7	protein_coding	446.067	0.504401	0.112499	4.48361	7.33911e-06	0.000181447
TM4SF1	ENSG00000169908.6	protein_coding	12715.2	-0.411565	0.0918118	-4.4827	7.37038e-06	0.000181908
RFC2	ENSG00000049541.6	protein_coding	1214	-0.45304	0.101166	-4.47819	7.52776e-06	0.000185474
MXRA8	ENSG00000162576.12	protein_coding	4504.87	0.385154	0.0860806	4.47434	7.66488e-06	0.00018853
PLEKHB1	ENSG00000021300.9	protein_coding	1209.86	0.380485	0.085149	4.46847	7.87827e-06	0.000193448
ASAP3	ENSG00000088280.14	protein_coding	2390.18	0.375881	0.0841417	4.46724	7.92363e-06	0.00019423
DEK	ENSG00000124795.10	protein_coding	10850.7	-0.323443	0.0725568	-4.45779	8.28087e-06	0.000202642
OBSCN	ENSG00000154358.15	protein_coding	1049	0.461011	0.103441	4.45677	8.32031e-06	0.000203261
SEC63	ENSG00000025796.9	protein_coding	5695.2	0.405479	0.0910602	4.45287	8.47309e-06	0.000206293
TINAGL1	ENSG00000142910.11	protein_coding	5887.04	-0.421632	0.0946833	-4.45308	8.46462e-06	0.000206293
SLC43A2	ENSG00000167703.10	protein_coding	3783	0.314548	0.0706878	4.44982	8.59411e-06	0.000208886
COQ4	ENSG00000167113.6	protein_coding	2528.47	0.339289	0.0762652	4.44881	8.63485e-06	0.000209523
SS18L1	ENSG00000184402.10	protein_coding	2279.4	0.428877	0.0966376	4.438	9.08003e-06	0.000219954
LRRC16A	ENSG00000079691.15	protein_coding	1032.38	-0.385286	0.0868674	-4.43533	9.19315e-06	0.00022232
E2F2	ENSG00000007968.6	protein_coding	191.484	-0.626916	0.141365	-4.43474	9.21843e-06	0.000222557
RDX	ENSG00000137710.10	protein_coding	4493.09	0.367899	0.083036	4.4306	9.3973e-06	0.000226495
MAP3K12	ENSG00000139625.8	protein_coding	1664.13	0.367564	0.0829907	4.42898	9.46783e-06	0.000227814
LYAR	ENSG00000145220.9	protein_coding	1756.01	-0.368208	0.083143	-4.42861	9.48415e-06	0.000227825
NUP37	ENSG00000075188.4	protein_coding	985.864	-0.453907	0.102748	-4.41768	9.9766e-06	0.000239255
DAAM1	ENSG00000100592.11	protein_coding	1606.01	-0.347204	0.0787808	-4.40721	1.04709e-05	0.000250418
C4orf47	ENSG00000205129.4	protein_coding	279.573	0.545855	0.123858	4.40709	1.04768e-05	0.000250418
MAP3K1	ENSG00000095015.5	protein_coding	2977.9	0.402056	0.0912831	4.4045	1.06028e-05	0.000253008
SHANK3	ENSG00000251322.3	protein_coding	532.081	0.51419	0.116949	4.39671	1.09903e-05	0.000261821
FIBCD1	ENSG00000130720.8	protein_coding	999.995	0.470818	0.10711	4.39565	1.10439e-05	0.000262663
THAP8	ENSG00000161277.9	protein_coding	487.981	0.454993	0.103521	4.3952	1.10671e-05	0.00026278
AGPAT3	ENSG00000160216.14	protein_coding	4453.55	-0.314265	0.0715518	-4.39213	1.12244e-05	0.000265638
MZT1	ENSG00000204899.5	protein_coding	720.194	-0.437101	0.0995113	-4.39248	1.12065e-05	0.000265638
MYO10	ENSG00000145555.10	protein_coding	10778.3	-0.329984	0.0751985	-4.38818	1.14304e-05	0.000270069
DESI2	ENSG00000121644.14	protein_coding	2763.07	-0.326736	0.0745018	-4.38561	1.15661e-05	0.000272826
CITED1	ENSG00000125931.6	protein_coding	316.171	0.524661	0.119908	4.37554	1.21131e-05	0.000285262
KCND1	ENSG00000102057.5	protein_coding	179.068	-0.633684	0.144849	-4.3748	1.21545e-05	0.000285769
BIN1	ENSG00000136717.10	protein_coding	3349.94	0.34512	0.0789038	4.37393	1.22029e-05	0.000286439
VEGFA	ENSG00000112715.16	protein_coding	70173.6	0.353943	0.0809348	4.37319	1.22444e-05	0.000286946
ABTB1	ENSG00000114626.13	protein_coding	2558.96	0.383891	0.0877951	4.37257	1.2279e-05	0.000287289
ITPR2	ENSG00000123104.7	protein_coding	1319.66	-0.376652	0.0861502	-4.37203	1.23094e-05	0.000287533
HAUS8	ENSG00000131351.10	protein_coding	910.143	-0.470109	0.107535	-4.37167	1.23298e-05	0.000287541
MCMBP	ENSG00000197771.8	protein_coding	5004.08	-0.303468	0.0694255	-4.37113	1.23605e-05	0.000287792
ASB2	ENSG00000100628.7	protein_coding	1249.26	-0.399684	0.0914457	-4.37073	1.23834e-05	0.00028786
RING1	ENSG00000204227.4	protein_coding	2384.49	0.366195	0.0838419	4.36768	1.25572e-05	0.000291429
TACC2	ENSG00000138162.13	protein_coding	4845.74	0.380986	0.0873671	4.36074	1.29621e-05	0.000300341
DNAH1	ENSG00000114841.13	protein_coding	1018.02	0.406402	0.0932093	4.3601	1.30003e-05	0.000300741
SGK1	ENSG00000118515.7	protein_coding	2757.04	-0.378272	0.0868366	-4.35614	1.32376e-05	0.000305739
KIF24	ENSG00000186638.11	protein_coding	540.344	-0.535651	0.123086	-4.35184	1.35e-05	0.0003113
CCDC150	ENSG00000144395.13	protein_coding	190.669	-0.606456	0.139399	-4.35051	1.35821e-05	0.000312192
ANKRD1	ENSG00000148677.6	protein_coding	1300.04	-0.443219	0.10187	-4.35081	1.35634e-05	0.000312192
RCCD1	ENSG00000166965.8	protein_coding	1286.17	-0.410382	0.0944638	-4.34433	1.39699e-05	0.000320594
ADAMTSL4	ENSG00000143382.9	protein_coding	754.232	0.405599	0.0934033	4.34244	1.40907e-05	0.000322338
RP11-235E17.6	ENSG00000262903.1	antisense	308.646	0.544917	0.125483	4.34255	1.40842e-05	0.000322338
BLM	ENSG00000197299.6	protein_coding	324.365	-0.498082	0.114923	-4.33407	1.46378e-05	0.000334323
MAPK6	ENSG00000069956.7	protein_coding	4133.83	-0.330546	0.0762868	-4.33294	1.47133e-05	0.000335514
IPO11	ENSG00000086200.12	protein_coding	1452.76	0.384106	0.088844	4.32338	1.53658e-05	0.00034984
LHPP	ENSG00000107902.9	protein_coding	1032.46	0.416456	0.096371	4.32138	1.55056e-05	0.000352465
EFNB3	ENSG00000108947.4	protein_coding	213.089	0.564385	0.130623	4.32071	1.55526e-05	0.000352974
LIG1	ENSG00000105486.9	protein_coding	2544.9	-0.402339	0.0931449	-4.31949	1.56388e-05	0.000354373
DOK3	ENSG00000146094.9	protein_coding	432.265	-0.537492	0.124475	-4.31806	1.57404e-05	0.000355555
GSTM2	ENSG00000213366.8	protein_coding	374.109	0.475976	0.110226	4.3182	1.57306e-05	0.000355555
MIS18BP1	ENSG00000129534.9	protein_coding	3083.55	-0.309898	0.0718166	-4.31513	1.59511e-05	0.00035975
NUCKS1	ENSG00000069275.12	protein_coding	16581.5	-0.306107	0.0709904	-4.31194	1.61829e-05	0.000364217
LMF1	ENSG00000103227.14	protein_coding	430.02	0.465149	0.10788	4.31171	1.61998e-05	0.000364217
CLDND1	ENSG00000080822.12	protein_coding	8453.18	0.337387	0.0782822	4.30988	1.63342e-05	0.000366518
ATPAF1	ENSG00000123472.8	protein_coding	1270.35	0.363333	0.0843129	4.30934	1.63742e-05	0.000366518
USP15	ENSG00000135655.9	protein_coding	1993.91	0.391683	0.0908929	4.30928	1.63785e-05	0.000366518
MTHFD1	ENSG00000100714.11	protein_coding	4427.55	-0.343728	0.0797979	-4.30749	1.65119e-05	0.000368927
OPLAH	ENSG00000178814.11	protein_coding	1162.48	0.406056	0.0943035	4.30584	1.66355e-05	0.000371114
KIAA1199	ENSG00000103888.11	protein_coding	2065.99	0.370527	0.0864176	4.28763	1.80589e-05	0.000402245
FOXO3	ENSG00000118689.10	protein_coding	2536.56	0.409844	0.0956272	4.28585	1.82045e-05	0.000404861
MRC2	ENSG00000011028.9	protein_coding	4964.37	0.309477	0.0723112	4.27979	1.87074e-05	0.000415402
CA12	ENSG00000074410.9	protein_coding	11835.3	0.307668	0.0720378	4.27093	1.94657e-05	0.000431575
HMGN4	ENSG00000182952.4	protein_coding	4345.24	0.336679	0.0788379	4.27052	1.95021e-05	0.000431717
POLA1	ENSG00000101868.6	protein_coding	904.814	-0.429923	0.100756	-4.26697	1.98147e-05	0.00043662
ELFN2	ENSG00000166897.10	protein_coding	527.483	0.452987	0.106154	4.26728	1.97868e-05	0.00043662
PRC1	ENSG00000198901.9	protein_coding	3343.57	-0.332268	0.0778585	-4.2676	1.97591e-05	0.00043662
C1S	ENSG00000182326.10	protein_coding	1846.88	0.364819	0.0857927	4.25233	2.11558e-05	0.00046546
SNPH	ENSG00000101298.9	protein_coding	798.609	0.412743	0.0971058	4.25044	2.13347e-05	0.000468679
MTPN	ENSG00000105887.10	protein_coding	5072.18	0.352586	0.0829638	4.24988	2.1389e-05	0.000469155
PRPS1	ENSG00000147224.6	protein_coding	2172.48	-0.346012	0.0814579	-4.24774	2.1594e-05	0.000472931
RAET1E	ENSG00000164520.7	protein_coding	101.345	-0.662453	0.155984	-4.24694	2.16709e-05	0.000473895
FNIP2	ENSG00000052795.8	protein_coding	1472.98	-0.352315	0.0830808	-4.24064	2.22888e-05	0.00048593
ALDH9A1	ENSG00000143149.8	protein_coding	3686.65	0.31093	0.0733177	4.24085	2.22672e-05	0.00048593
HPS6	ENSG00000166189.6	protein_coding	1676.82	0.418778	0.0988314	4.2373	2.26223e-05	0.000492454
SH3PXD2B	ENSG00000174705.7	protein_coding	2485.65	0.409547	0.0966752	4.23632	2.27209e-05	0.000493109
SFTA1P	ENSG00000225383.2	lincRNA	709.643	-0.49328	0.116432	-4.23665	2.26883e-05	0.000493109
PSMD14	ENSG00000115233.7	protein_coding	4471.72	-0.34725	0.0820042	-4.23454	2.29019e-05	0.000495893
BMP2K	ENSG00000138756.13	protein_coding	1000.18	-0.374898	0.0885367	-4.23438	2.29181e-05	0.000495893
MAST1	ENSG00000105613.5	protein_coding	650.337	0.422791	0.099863	4.23371	2.29869e-05	0.000496634
DCLRE1A	ENSG00000198924.3	protein_coding	987.324	-0.39136	0.0926231	-4.22529	2.3863e-05	0.000514789
MR1	ENSG00000153029.10	protein_coding	748.423	-0.421398	0.0998178	-4.22167	2.42497e-05	0.000522348
CSTF2	ENSG00000101811.9	protein_coding	1587.56	-0.400524	0.0949617	-4.21774	2.46762e-05	0.000530192
ZNF251	ENSG00000198169.4	protein_coding	2770.19	0.339699	0.0805425	4.21764	2.46875e-05	0.000530192
IRF9	ENSG00000213928.4	protein_coding	244.438	0.5245	0.124466	4.214	2.50886e-05	0.000538004
LAMB2	ENSG00000172037.9	protein_coding	48362.4	0.284414	0.0675668	4.20937	2.5608e-05	0.000548323
HNRNPM	ENSG00000099783.7	protein_coding	13380.1	-0.299141	0.0710941	-4.20768	2.58005e-05	0.00054999
PANK1	ENSG00000152782.12	protein_coding	309.046	-0.527546	0.12537	-4.2079	2.57752e-05	0.00054999
DCK	ENSG00000156136.5	protein_coding	826.511	-0.389035	0.09245	-4.20806	2.57567e-05	0.00054999
CD14	ENSG00000170458.9	protein_coding	753.245	0.423452	0.100665	4.20653	2.59322e-05	0.000551979
VGLL4	ENSG00000144560.9	protein_coding	3427.58	0.325595	0.0774578	4.20351	2.62807e-05	0.000558572
ACPL2	ENSG00000155893.7	protein_coding	580.461	0.419338	0.0998659	4.199	2.68091e-05	0.000568962
TEAD2	ENSG00000074219.9	protein_coding	3573.13	0.315803	0.0752696	4.19563	2.72115e-05	0.000576652
EPHA2	ENSG00000142627.9	protein_coding	23247	-0.293952	0.0700832	-4.19433	2.73678e-05	0.00057911
EBF4	ENSG00000088881.16	protein_coding	931.753	0.377303	0.0899904	4.19271	2.75646e-05	0.000582419
CLCN4	ENSG00000073464.7	protein_coding	748.832	-0.420234	0.10033	-4.18852	2.8078e-05	0.000592283
DHFR	ENSG00000228716.2	protein_coding	2888.23	-0.32346	0.0772306	-4.18823	2.81138e-05	0.000592283
CIITA	ENSG00000179583.13	protein_coding	3222.83	0.380497	0.0909173	4.18509	2.85049e-05	0.000599644
FCGBP	ENSG00000090920.9	protein_coding	1263.05	0.405899	0.0970066	4.18424	2.86121e-05	0.000601021
HNRNPA2B1	ENSG00000122566.16	protein_coding	40198.8	-0.302641	0.0723676	-4.182	2.88956e-05	0.000606091
NUP35	ENSG00000163002.8	protein_coding	552.318	-0.485866	0.116334	-4.17646	2.96083e-05	0.000620137
VCL	ENSG00000035403.12	protein_coding	19159.5	-0.292056	0.0699566	-4.17482	2.98224e-05	0.000622809
CLK4	ENSG00000113240.8	protein_coding	1847.36	0.329971	0.079034	4.17505	2.97921e-05	0.000622809
KIFC2	ENSG00000167702.7	protein_coding	2351.56	0.383359	0.0918472	4.17388	2.99461e-05	0.000624485
MPZL1	ENSG00000197965.7	protein_coding	7385.25	-0.275929	0.0661218	-4.17305	3.00553e-05	0.000625854
FBXO32	ENSG00000156804.3	protein_coding	4885.36	0.300344	0.0720139	4.17063	3.03752e-05	0.000631603
PLIN2	ENSG00000147872.5	protein_coding	10880.5	0.380706	0.0913676	4.16675	3.08969e-05	0.000641523
ANKRD22	ENSG00000152766.5	protein_coding	288.047	-0.520227	0.124885	-4.16566	3.10459e-05	0.000643688
LGR6	ENSG00000133067.13	protein_coding	65.0039	0.698612	0.16779	4.1636	3.13266e-05	0.000647641
CASK	ENSG00000147044.16	protein_coding	3770.03	0.354429	0.0851203	4.16386	3.12912e-05	0.000647641
ANK1	ENSG00000029534.15	protein_coding	811.668	0.438336	0.105447	4.15695	3.22528e-05	0.000665833
SEMA6C	ENSG00000143434.11	protein_coding	370.065	0.47103	0.113352	4.15546	3.24634e-05	0.000669221
HSPA6	ENSG00000173110.6	protein_coding	276.063	0.61426	0.147881	4.15375	3.27077e-05	0.000673291
NEK7	ENSG00000151414.10	protein_coding	3319.6	0.391054	0.0941559	4.15326	3.27767e-05	0.000673749
ARRDC4	ENSG00000140450.7	protein_coding	629.26	0.48567	0.117047	4.14934	3.33433e-05	0.000684417
PPP2R5B	ENSG00000068971.9	protein_coding	2107.7	0.349095	0.084192	4.14642	3.37721e-05	0.000692233
CPS1	ENSG00000021826.10	protein_coding	496.638	0.464156	0.112024	4.14337	3.42235e-05	0.000700486
MYOF	ENSG00000138119.12	protein_coding	36541.1	-0.289313	0.0698954	-4.13923	3.48481e-05	0.000712257
SLC2A4RG	ENSG00000125520.9	protein_coding	4701.64	0.357833	0.0864717	4.13815	3.50112e-05	0.000714575
TBXAS1	ENSG00000059377.11	protein_coding	1355.03	-0.351828	0.0850601	-4.13623	3.53057e-05	0.000717906
CASC3	ENSG00000108349.10	protein_coding	6041.67	0.296924	0.0717845	4.13632	3.52917e-05	0.000717906
PAPPA2	ENSG00000116183.6	protein_coding	139.993	-0.611546	0.147855	-4.13611	3.5324e-05	0.000717906
YPEL3	ENSG00000090238.7	protein_coding	1647.47	0.335676	0.0812337	4.13223	3.59263e-05	0.000729116
FAM110B	ENSG00000169122.7	protein_coding	247.822	0.515247	0.124713	4.13148	3.60439e-05	0.000730472
RAB27A	ENSG00000069974.11	protein_coding	2265.57	0.370679	0.0897426	4.13047	3.62029e-05	0.000732663
CCDC34	ENSG00000109881.12	protein_coding	691.233	-0.434571	0.105237	-4.12946	3.63622e-05	0.000734854
DBNDD1	ENSG00000003249.9	protein_coding	656.198	0.406515	0.0984833	4.12776	3.66317e-05	0.000739261
MNS1	ENSG00000138587.5	protein_coding	124.182	-0.636563	0.154233	-4.1273	3.67055e-05	0.000739714
HTRA1	ENSG00000166033.7	protein_coding	7270.17	0.309727	0.0752831	4.11416	3.88596e-05	0.000782028
PPM1G	ENSG00000115241.9	protein_coding	8405.81	-0.310723	0.0755465	-4.113	3.90547e-05	0.000784858
RAD18	ENSG00000070950.5	protein_coding	1177.22	-0.362618	0.0881751	-4.11247	3.91444e-05	0.000785563
EOGT	ENSG00000163378.9	protein_coding	1011.5	-0.356786	0.086764	-4.11215	3.91993e-05	0.000785569
GLCCI1	ENSG00000106415.8	protein_coding	514.516	0.455074	0.110948	4.10167	4.10176e-05	0.000820865
FAM43A	ENSG00000185112.4	protein_coding	1356.84	-0.385761	0.0940854	-4.10012	4.12941e-05	0.000825251
HAUS5	ENSG00000249115.4	protein_coding	1054.42	-0.432199	0.105442	-4.09891	4.15102e-05	0.000828419
PTDSS1	ENSG00000156471.8	protein_coding	4784.4	-0.296687	0.0724277	-4.09633	4.19759e-05	0.000836554
DCAF12	ENSG00000198876.8	protein_coding	3795.64	-0.303173	0.0740299	-4.09527	4.21672e-05	0.000839204
YARS	ENSG00000134684.6	protein_coding	6403.44	-0.31324	0.0765414	-4.09242	4.26893e-05	0.00084842
SPAG1	ENSG00000104450.8	protein_coding	761.997	-0.401104	0.098024	-4.09189	4.27863e-05	0.000849175
DNAH11	ENSG00000105877.13	protein_coding	1892.32	0.421988	0.103152	4.09093	4.29645e-05	0.000851538
PPT1	ENSG00000131238.12	protein_coding	7103.83	-0.334442	0.0818042	-4.08832	4.34508e-05	0.000858811
DDX10	ENSG00000178105.5	protein_coding	3077.16	-0.32252	0.0788876	-4.08835	4.34461e-05	0.000858811
XAGE1B	ENSG00000204382.7	protein_coding	41.0037	-0.675234	0.165283	-4.08531	4.40181e-05	0.000868829
DIAPH1	ENSG00000131504.11	protein_coding	10608.3	-0.271712	0.0665252	-4.08435	4.42006e-05	0.000871236
GABBR1	ENSG00000204681.6	protein_coding	1366.39	0.3765	0.0922182	4.08271	4.45142e-05	0.000876217
CCDC18	ENSG00000122483.13	protein_coding	466.192	-0.452394	0.110854	-4.08098	4.4847e-05	0.000881561
MEGF6	ENSG00000162591.11	protein_coding	914.338	0.381875	0.0935868	4.08044	4.49504e-05	0.00088239
ITGB1	ENSG00000150093.14	protein_coding	87781.6	-0.278457	0.0682781	-4.07827	4.53718e-05	0.000889448
COMMD2	ENSG00000114744.4	protein_coding	1131.38	-0.346868	0.085226	-4.06998	4.70169e-05	0.000919194
PLBD1	ENSG00000121316.6	protein_coding	406.882	0.465253	0.114305	4.07028	4.69574e-05	0.000919194
SCD5	ENSG00000145284.7	protein_coding	1836.85	-0.327998	0.0806483	-4.06702	4.76183e-05	0.000929688
LBR	ENSG00000143815.10	protein_coding	4139.64	-0.307348	0.0756097	-4.06493	4.8047e-05	0.000936786
L1CAM	ENSG00000198910.8	protein_coding	6591.26	0.357488	0.0881488	4.05551	5.00254e-05	0.000974039
RANBP1	ENSG00000099901.12	protein_coding	2469.48	-0.403963	0.0996428	-4.05412	5.0324e-05	0.00097853
SORBS2	ENSG00000154556.13	protein_coding	749.011	-0.399907	0.0987323	-4.05042	5.11258e-05	0.000991995
VPS8	ENSG00000156931.11	protein_coding	2135.28	0.332072	0.0819873	4.05029	5.11544e-05	0.000991995
PKMYT1	ENSG00000127564.12	protein_coding	428.339	-0.496353	0.122581	-4.04919	5.13943e-05	0.000995306
PLXNA1	ENSG00000114554.7	protein_coding	26793.7	-0.299832	0.0740799	-4.04742	5.17853e-05	0.00100019
PPIL1	ENSG00000137168.7	protein_coding	4472.25	-0.336709	0.0831908	-4.04743	5.17826e-05	0.00100019
BICC1	ENSG00000122870.7	protein_coding	972.695	-0.401751	0.0993241	-4.04485	5.23558e-05	0.00100985
SOCS5	ENSG00000171150.7	protein_coding	2072.3	0.371588	0.0919175	4.04262	5.28573e-05	0.00101816
B3GNT7	ENSG00000156966.6	protein_coding	926.11	0.365091	0.0903246	4.04199	5.3e-05	0.00101954
SHOX2	ENSG00000168779.15	protein_coding	1236.28	0.36849	0.0912686	4.03742	5.40413e-05	0.00103819
NCOA7	ENSG00000111912.14	protein_coding	2030.32	-0.324159	0.080299	-4.0369	5.41619e-05	0.00103885
CALHM2	ENSG00000138172.6	protein_coding	1280.39	0.34489	0.0854396	4.03665	5.42202e-05	0.00103885
ENC1	ENSG00000171617.9	protein_coding	7176.44	-0.273687	0.0678063	-4.03631	5.4299e-05	0.00103897
CALM2	ENSG00000143933.12	protein_coding	26921.4	-0.292627	0.0725127	-4.03553	5.44783e-05	0.00104102
OSGIN2	ENSG00000164823.5	protein_coding	738.422	0.386268	0.0957951	4.03223	5.52496e-05	0.00105436
REEP4	ENSG00000168476.7	protein_coding	1215.3	-0.374355	0.092852	-4.03174	5.53648e-05	0.00105516
AQP1	ENSG00000240583.6	protein_coding	161.281	0.58207	0.144441	4.0298	5.58244e-05	0.00106251
PRKAG2	ENSG00000106617.9	protein_coding	1152.41	-0.340855	0.0846267	-4.02774	5.63147e-05	0.00107043
THUMPD1	ENSG00000066654.8	protein_coding	1622.9	0.311378	0.0773615	4.02497	5.69829e-05	0.0010817
SUN2	ENSG00000100242.11	protein_coding	5587.13	-0.318914	0.0792454	-4.02438	5.71257e-05	0.00108298
CLCN3	ENSG00000109572.9	protein_coding	7273.25	-0.285657	0.0710485	-4.02059	5.80533e-05	0.00109845
NUP210	ENSG00000132182.7	protein_coding	632.54	-0.434092	0.107972	-4.02042	5.80943e-05	0.00109845
CACHD1	ENSG00000158966.9	protein_coding	407.37	0.444129	0.110481	4.01997	5.82055e-05	0.00109911
TAF5	ENSG00000148835.9	protein_coding	595.535	-0.411239	0.102322	-4.01905	5.84331e-05	0.00110196
TTLL5	ENSG00000119685.15	protein_coding	2190.39	-0.321442	0.0800546	-4.01528	5.93741e-05	0.00111824
E2F7	ENSG00000165891.11	protein_coding	8533.65	-0.285207	0.071044	-4.01451	5.95686e-05	0.00112043
NUP107	ENSG00000111581.5	protein_coding	2436.07	-0.353076	0.0880108	-4.01173	6.02743e-05	0.00113007
CYP2E1	ENSG00000130649.5	protein_coding	203.459	0.581222	0.144865	4.01216	6.01651e-05	0.00113007
ARHGAP23	ENSG00000225485.3	protein_coding	5821.49	-0.277225	0.0691065	-4.01157	6.03164e-05	0.00113007
HLA-DRA	ENSG00000204287.9	protein_coding	6988.13	0.356306	0.088851	4.01015	6.06796e-05	0.00113539
ANKRD50	ENSG00000151458.7	protein_coding	3867.97	0.361526	0.0902869	4.00419	6.22299e-05	0.00116289
CENPL	ENSG00000120334.11	protein_coding	589.584	-0.40682	0.101623	-4.00322	6.24873e-05	0.00116619
SLCO2A1	ENSG00000174640.8	protein_coding	440.665	0.441511	0.110336	4.00151	6.29409e-05	0.00117313
ATAD5	ENSG00000176208.4	protein_coding	415.405	-0.439159	0.109779	-4.0004	6.32356e-05	0.0011771
SMAD2	ENSG00000175387.11	protein_coding	4504.74	0.322053	0.0806053	3.99543	6.45774e-05	0.00120052
COA1	ENSG00000106603.13	protein_coding	4520.11	-0.287035	0.071894	-3.99247	6.53887e-05	0.00121337
SYNPO	ENSG00000171992.8	protein_coding	551.932	-0.443244	0.111033	-3.99199	6.55217e-05	0.00121337
FOXO4	ENSG00000184481.12	protein_coding	1595.08	0.31793	0.0796363	3.99228	6.54414e-05	0.00121337
HIRIP3	ENSG00000149929.11	protein_coding	635.245	-0.455516	0.114116	-3.99168	6.56061e-05	0.00121338
POLE	ENSG00000177084.12	protein_coding	2094.42	-0.395625	0.0991366	-3.99071	6.58768e-05	0.00121682
RNASEH2A	ENSG00000104889.4	protein_coding	3184.79	-0.430426	0.107949	-3.9873	6.68306e-05	0.00123285
SPDEF	ENSG00000124664.6	protein_coding	5662.22	0.309149	0.0775835	3.98473	6.75577e-05	0.00124467
FDPS	ENSG00000160752.10	protein_coding	6267.91	-0.332589	0.0835221	-3.98204	6.83252e-05	0.0012572
PNP	ENSG00000198805.7	protein_coding	2941.42	-0.354132	0.0889401	-3.98169	6.84281e-05	0.00125749
VNN1	ENSG00000112299.7	protein_coding	693.969	-0.391293	0.0983197	-3.9798	6.89737e-05	0.00126531
SNRPD1	ENSG00000167088.6	protein_coding	3054.63	-0.392591	0.0986507	-3.97961	6.90296e-05	0.00126531
SIPA1	ENSG00000213445.4	protein_coding	3159.47	0.362926	0.0912845	3.97577	7.01519e-05	0.00128424
SOX2	ENSG00000181449.2	protein_coding	209.107	0.56316	0.141728	3.97353	7.08153e-05	0.00129474
RORB	ENSG00000198963.6	protein_coding	263.46	0.539952	0.135941	3.97195	7.12865e-05	0.0013017
HDAC5	ENSG00000108840.11	protein_coding	4612.45	0.28169	0.0709318	3.97128	7.14871e-05	0.00130371
RGAG4	ENSG00000242732.3	protein_coding	1089.23	0.370992	0.0934269	3.97094	7.15901e-05	0.00130394
RUFY2	ENSG00000204130.8	protein_coding	1232.78	0.376877	0.0949314	3.96999	7.18749e-05	0.00130747
COL19A1	ENSG00000082293.8	protein_coding	128.54	0.597562	0.150571	3.96863	7.22858e-05	0.00131163
NUP205	ENSG00000155561.10	protein_coding	4435.43	-0.332282	0.0837268	-3.96865	7.22818e-05	0.00131163
MAGED2	ENSG00000102316.12	protein_coding	21582.3	0.26788	0.0675202	3.96741	7.26592e-05	0.00131674
PCED1A	ENSG00000132635.12	protein_coding	2614.24	0.333487	0.0840971	3.9655	7.32419e-05	0.00132397
SMTN	ENSG00000183963.14	protein_coding	4361.07	-0.295791	0.0745895	-3.96558	7.32184e-05	0.00132397
FAM105A	ENSG00000145569.5	protein_coding	854.57	-0.351916	0.088771	-3.96431	7.36082e-05	0.00132892
FAM109A	ENSG00000198324.10	protein_coding	2489.01	0.297065	0.0750321	3.95918	7.5209e-05	0.00135612
TGFB1	ENSG00000105329.5	protein_coding	8559.11	0.363763	0.091942	3.95644	7.60748e-05	0.00137001
GGH	ENSG00000137563.7	protein_coding	1693.47	-0.398272	0.100721	-3.95422	7.67856e-05	0.00138109
NELFB	ENSG00000188986.4	protein_coding	5748.07	0.307677	0.0778897	3.95016	7.80991e-05	0.00140296
KLHL2	ENSG00000109466.9	protein_coding	1945.62	0.329215	0.0833761	3.94855	7.86245e-05	0.00141063
LRRC59	ENSG00000108829.9	protein_coding	11289.3	-0.255535	0.064752	-3.94637	7.93465e-05	0.00142005
KLHL29	ENSG00000119771.10	protein_coding	2001.11	-0.345847	0.0876316	-3.9466	7.92684e-05	0.00142005
GPR173	ENSG00000184194.5	protein_coding	856.149	0.496438	0.125844	3.94487	7.98445e-05	0.00142718
OTUB2	ENSG00000089723.5	protein_coding	4613.76	-0.311823	0.0790631	-3.94398	8.01408e-05	0.0014307
JAG1	ENSG00000101384.7	protein_coding	14827.8	-0.261639	0.0663632	-3.94253	8.06271e-05	0.0014376
MPHOSPH6	ENSG00000135698.5	protein_coding	1185.84	-0.355112	0.0901964	-3.9371	8.24715e-05	0.00146867
CLOCK	ENSG00000134852.10	protein_coding	2844.97	-0.287087	0.0729494	-3.93542	8.30506e-05	0.00147715
CEP152	ENSG00000103995.9	protein_coding	504.574	-0.411572	0.104597	-3.93483	8.3257e-05	0.00147899
EXOSC9	ENSG00000123737.8	protein_coding	1900.08	-0.372235	0.0946257	-3.93376	8.36262e-05	0.00148372
KIF11	ENSG00000138160.4	protein_coding	2368.42	-0.32614	0.0829163	-3.93336	8.37657e-05	0.00148437
CA9	ENSG00000107159.8	protein_coding	862.191	0.439613	0.111844	3.9306	8.47334e-05	0.00149967
CENPH	ENSG00000153044.5	protein_coding	171.083	-0.561475	0.142886	-3.92954	8.511e-05	0.00150448
PDE7B	ENSG00000171408.9	protein_coding	571.161	-0.399196	0.101616	-3.92848	8.54853e-05	0.00150926
GSPT1	ENSG00000103342.8	protein_coding	6982.37	-0.264574	0.0673658	-3.92743	8.58584e-05	0.00151029
DKFZP761J1410	ENSG00000105520.6	protein_coding	3746.96	0.286162	0.0728541	3.92787	8.57003e-05	0.00151029
CEP135	ENSG00000174799.6	protein_coding	1112.92	-0.34168	0.0869981	-3.92744	8.58534e-05	0.00151029
TXNIP	ENSG00000117289.7	protein_coding	43032.4	0.32545	0.082912	3.92525	8.66402e-05	0.00152218
BCAM	ENSG00000187244.6	protein_coding	3406.74	0.285004	0.0726325	3.92391	8.71217e-05	0.0015272
TUBB3	ENSG00000258947.2	protein_coding	421.981	0.451963	0.115183	3.92387	8.7138e-05	0.0015272
SH3KBP1	ENSG00000147010.13	protein_coding	5260.54	-0.276967	0.0706078	-3.92261	8.75937e-05	0.00153332
ALOX5	ENSG00000012779.6	protein_coding	180.462	0.567223	0.144713	3.91965	8.86783e-05	0.00155042
BARD1	ENSG00000138376.6	protein_coding	401.031	-0.439608	0.112246	-3.91647	8.98538e-05	0.00156906
IDH3A	ENSG00000166411.9	protein_coding	825.558	0.357452	0.091297	3.91527	9.03043e-05	0.00157502
LINC00886	ENSG00000240875.1	lincRNA	129.704	0.630542	0.161168	3.91234	9.14077e-05	0.00159233
EPHB4	ENSG00000196411.5	protein_coding	4796.17	0.286	0.0731249	3.91112	9.18702e-05	0.00159845
HN1	ENSG00000189159.11	protein_coding	6665.53	-0.361486	0.0924567	-3.90979	9.23771e-05	0.00160533
SEC14L2	ENSG00000100003.13	protein_coding	2335.84	0.318052	0.0813722	3.9086	9.2831e-05	0.00161127
XYLT2	ENSG00000015532.5	protein_coding	1855.98	0.325184	0.0832199	3.90753	9.32449e-05	0.00161547
CMTM3	ENSG00000140931.15	protein_coding	2157.6	0.330907	0.0846874	3.90739	9.32971e-05	0.00161547
TIPIN	ENSG00000075131.5	protein_coding	372.693	-0.450814	0.115466	-3.90431	9.44933e-05	0.00163421
EBP	ENSG00000147155.6	protein_coding	2377.66	-0.360644	0.0924151	-3.90244	9.52282e-05	0.00164494
RP11-353B9.1	ENSG00000261597.1	sense_overlapping	130.826	0.606985	0.155602	3.90089	9.58379e-05	0.00165349
APOE	ENSG00000130203.5	protein_coding	1388.32	0.419205	0.107472	3.90059	9.59569e-05	0.00165356
TOP1	ENSG00000198900.5	protein_coding	9097.86	-0.25377	0.0651063	-3.89778	9.70774e-05	0.00167087
ASS1	ENSG00000130707.13	protein_coding	1522.23	0.37637	0.0966417	3.89448	9.84081e-05	0.00169175
HDHD1	ENSG00000130021.9	protein_coding	739.087	-0.417804	0.107386	-3.89068	9.9964e-05	0.00171645
TRAF3	ENSG00000131323.10	protein_coding	3053.62	-0.281115	0.0722902	-3.8887	0.000100781	0.00172841
MYH10	ENSG00000133026.8	protein_coding	2191.93	-0.359599	0.0924968	-3.88769	0.000101202	0.0017315
EPOR	ENSG00000187266.9	protein_coding	1666.36	0.343756	0.0884175	3.88787	0.000101127	0.0017315
CAPRIN2	ENSG00000110888.13	protein_coding	8318.67	0.299952	0.0771819	3.8863	0.000101783	0.00173732
DDAH2	ENSG00000213722.4	protein_coding	5657.51	0.317964	0.0818165	3.8863	0.000101782	0.00173732
C5orf42	ENSG00000197603.9	protein_coding	1384.95	0.349405	0.089928	3.88539	0.000102167	0.00174181
FADS1	ENSG00000149485.12	protein_coding	17700.6	-0.250884	0.064634	-3.88162	0.000103763	0.00176692
CNTNAP3B	ENSG00000154529.10	protein_coding	1678.8	0.363252	0.0936567	3.87855	0.000105081	0.00178724
CRTC1	ENSG00000105662.11	protein_coding	3568.85	0.305331	0.0787531	3.87706	0.000105725	0.00179608
MSH2	ENSG00000095002.8	protein_coding	2261.08	-0.314787	0.0812756	-3.87308	0.00010747	0.00182357
TXNRD1	ENSG00000198431.11	protein_coding	17975.7	-0.277852	0.0717676	-3.87155	0.000108146	0.00183288
ASB8	ENSG00000177981.6	protein_coding	993.451	0.354724	0.0917287	3.8671	0.000110136	0.00186442
UBR7	ENSG00000012963.9	protein_coding	2316.36	-0.317205	0.0820409	-3.86643	0.000110441	0.00186737
TUBGCP3	ENSG00000126216.8	protein_coding	1438.53	-0.318501	0.0824477	-3.86307	0.00011197	0.00189101
MBD2	ENSG00000134046.7	protein_coding	2544.25	-0.291258	0.0754071	-3.86247	0.000112245	0.00189342
CLIC3	ENSG00000169583.12	protein_coding	288.758	0.538362	0.13941	3.86172	0.00011259	0.00189702
UBE2S	ENSG00000108106.9	protein_coding	5242.72	-0.4399	0.113928	-3.86122	0.000112822	0.00189871
WDR34	ENSG00000119333.7	protein_coding	3506.39	-0.402757	0.104429	-3.85676	0.000114901	0.00193036
SIRT3	ENSG00000142082.10	protein_coding	1102.59	0.348657	0.090405	3.85661	0.000114971	0.00193036
SSX2IP	ENSG00000117155.12	protein_coding	1086.89	-0.337897	0.0876327	-3.85583	0.000115338	0.00193426
RASSF2	ENSG00000101265.11	protein_coding	325.904	0.465358	0.120727	3.85464	0.0001159	0.00194143
LRP1	ENSG00000123384.9	protein_coding	27085.8	0.345166	0.0895638	3.85386	0.00011627	0.00194537
TCP1	ENSG00000120438.7	protein_coding	10816.7	-0.257255	0.0667908	-3.85166	0.00011732	0.00196066
IL31RA	ENSG00000164509.9	protein_coding	937.393	-0.363243	0.094412	-3.84743	0.000119363	0.00199248
PFKFB4	ENSG00000114268.7	protein_coding	6789.34	0.306877	0.0797811	3.84649	0.000119823	0.00199783
EFEMP2	ENSG00000172638.8	protein_coding	669.2	0.43216	0.112505	3.84125	0.000122412	0.00203864
ZFAND5	ENSG00000107372.8	protein_coding	17198.4	0.287142	0.0747628	3.84071	0.000122677	0.0020407
ZNF449	ENSG00000173275.8	protein_coding	648.391	0.378913	0.0986929	3.83932	0.000123377	0.00204996
DDX21	ENSG00000165732.8	protein_coding	9584.12	-0.264627	0.0689458	-3.83819	0.000123943	0.002057
DMBT1	ENSG00000187908.11	protein_coding	1216.46	-0.325319	0.0847654	-3.83787	0.000124106	0.00205732
TGFB2	ENSG00000092969.7	protein_coding	2775	0.393485	0.102643	3.83353	0.000126318	0.00209159
ID3	ENSG00000117318.8	protein_coding	88.5991	0.622416	0.162469	3.831	0.000127625	0.00211081
ZADH2	ENSG00000180011.6	protein_coding	1438.61	-0.309406	0.0807902	-3.82974	0.000128277	0.00211915
EIF5A2	ENSG00000163577.3	protein_coding	773.896	-0.392812	0.102613	-3.8281	0.000129139	0.00212606
LTBP3	ENSG00000168056.10	protein_coding	10728.4	0.276811	0.072309	3.82817	0.0001291	0.00212606
PACS2	ENSG00000179364.9	protein_coding	5209.44	0.282185	0.0737067	3.82849	0.000128934	0.00212606
POLE3	ENSG00000148229.8	protein_coding	3951.62	-0.316132	0.0826428	-3.82529	0.000130621	0.002148
ITPR3	ENSG00000096433.6	protein_coding	33817.6	0.275674	0.07209	3.82402	0.000131295	0.00215663
KIF3B	ENSG00000101350.6	protein_coding	7101.56	-0.264821	0.0692791	-3.82253	0.000132091	0.00216723
CSE1L	ENSG00000124207.12	protein_coding	12612	-0.274637	0.0718582	-3.82193	0.00013241	0.00216963
IGSF3	ENSG00000143061.13	protein_coding	2413.54	0.309166	0.0808976	3.82169	0.000132539	0.00216963
CTSD	ENSG00000117984.8	protein_coding	107440	0.299041	0.0782609	3.82107	0.000132872	0.00217045
GINS2	ENSG00000131153.4	protein_coding	320.771	-0.470799	0.123212	-3.82104	0.000132891	0.00217045
PANK3	ENSG00000120137.6	protein_coding	6154.31	0.380713	0.0996454	3.82067	0.000133088	0.00217121
SC5D	ENSG00000109929.5	protein_coding	2254.1	-0.311253	0.081496	-3.81924	0.000133862	0.00218136
SGTA	ENSG00000104969.5	protein_coding	3894.51	0.300608	0.0787238	3.81851	0.000134259	0.00218535
PCDH7	ENSG00000169851.11	protein_coding	790.977	0.361187	0.0946201	3.81723	0.000134956	0.00219421
TMEM170B	ENSG00000205269.4	protein_coding	519.49	0.468319	0.122762	3.81486	0.00013626	0.00221292
CYP27A1	ENSG00000135929.4	protein_coding	1070.58	0.361378	0.0947787	3.81286	0.00013737	0.00222842
CTDSPL	ENSG00000144677.10	protein_coding	2675.96	-0.296966	0.0779014	-3.81207	0.000137807	0.002233
OTUD6B	ENSG00000155100.6	protein_coding	550.182	-0.375409	0.0985057	-3.81104	0.000138384	0.00223983
AGO4	ENSG00000134698.10	protein_coding	1479.39	0.395629	0.103874	3.80874	0.000139676	0.0022582
HIST1H4H	ENSG00000158406.2	protein_coding	672.582	0.391073	0.102745	3.80625	0.000141088	0.00227847
TFDP1	ENSG00000198176.8	protein_coding	4770.66	-0.283833	0.0746224	-3.8036	0.000142611	0.00230048
CEP70	ENSG00000114107.4	protein_coding	763.67	-0.381842	0.100511	-3.79899	0.000145286	0.00234101
SHISA2	ENSG00000180730.4	protein_coding	3315.19	0.341819	0.0900022	3.7979	0.000145927	0.00234629
PLXNB3	ENSG00000198753.7	protein_coding	3600.16	0.298752	0.0786629	3.79788	0.00014594	0.00234629
ITGB8	ENSG00000105855.5	protein_coding	583.411	0.435982	0.114985	3.79164	0.000149655	0.00240065
VANGL1	ENSG00000173218.10	protein_coding	2832.05	-0.285525	0.0753004	-3.79181	0.000149554	0.00240065
GALNS	ENSG00000141012.8	protein_coding	1951.95	0.308812	0.0815302	3.7877	0.000152046	0.00243629
MCM7	ENSG00000166508.13	protein_coding	9476.39	-0.343722	0.0907572	-3.78727	0.000152313	0.00243785
MMD	ENSG00000108960.3	protein_coding	1389.81	-0.322181	0.0850931	-3.78622	0.000152959	0.00244547
HECTD2	ENSG00000165338.12	protein_coding	709.919	0.388853	0.102884	3.77951	0.000157137	0.00250948
ADORA2B	ENSG00000170425.3	protein_coding	3348.78	-0.328351	0.0869137	-3.7779	0.000158157	0.00252298
BAIAP3	ENSG00000007516.9	protein_coding	1075.6	0.323399	0.0856171	3.77727	0.000158559	0.00252659
ISOC1	ENSG00000066583.7	protein_coding	834.128	-0.364179	0.0964277	-3.77671	0.000158915	0.00252945
AC068580.5	ENSG00000229512.1	sense_intronic	70.0814	0.628713	0.166537	3.77521	0.000159873	0.00254188
ANTXR2	ENSG00000163297.12	protein_coding	22705.2	-0.25967	0.068801	-3.77422	0.000160507	0.00254915
PPIC	ENSG00000168938.5	protein_coding	975.202	-0.345548	0.0916584	-3.76996	0.000163277	0.00259029
NPTXR	ENSG00000221890.2	protein_coding	477.646	0.452777	0.120114	3.76955	0.000163545	0.00259168
VEGFB	ENSG00000173511.5	protein_coding	3886.81	0.289256	0.0767934	3.76668	0.000165434	0.00261874
ENO2	ENSG00000111674.4	protein_coding	15101.8	0.294537	0.0782186	3.76556	0.000166179	0.00262764
WISP2	ENSG00000064205.6	protein_coding	201.154	0.564255	0.149861	3.76518	0.000166431	0.00262874
RTTN	ENSG00000176225.8	protein_coding	636.574	-0.38314	0.101805	-3.76348	0.000167564	0.00264373
RAPGEF4	ENSG00000091428.13	protein_coding	292.151	0.551181	0.146507	3.76215	0.00016846	0.00265494
PLK2	ENSG00000145632.10	protein_coding	10552.3	-0.304033	0.0808357	-3.76113	0.000169149	0.00266289
COL12A1	ENSG00000111799.16	protein_coding	2297.85	-0.323018	0.0859243	-3.75933	0.000170369	0.00267917
C7orf41	ENSG00000180354.11	protein_coding	727.127	0.348729	0.0928961	3.75397	0.000174056	0.00273417
GYS1	ENSG00000104812.10	protein_coding	5700.36	0.291119	0.0775751	3.75273	0.000174918	0.00274172
ZNF697	ENSG00000143067.4	protein_coding	2566.41	-0.27755	0.073956	-3.75291	0.000174792	0.00274172
ILF2	ENSG00000143621.12	protein_coding	12641.6	-0.308407	0.0822116	-3.75139	0.00017586	0.00274889
CD96	ENSG00000153283.8	protein_coding	399.879	-0.414351	0.110457	-3.75126	0.000175949	0.00274889
CENPN	ENSG00000166451.9	protein_coding	772.351	-0.37202	0.0991714	-3.75128	0.000175934	0.00274889
SH3BP2	ENSG00000087266.11	protein_coding	10707.3	0.304887	0.0813545	3.74764	0.000178509	0.00278586
FH	ENSG00000091483.6	protein_coding	3293.93	-0.330359	0.0881667	-3.74698	0.000178975	0.00279012
RP11-24F11.2	ENSG00000223552.1	antisense	119.629	-0.580077	0.154826	-3.74665	0.000179214	0.00279081
STMN1	ENSG00000117632.16	protein_coding	29245.5	-0.289642	0.077428	-3.74079	0.000183444	0.00285359
TRIOBP	ENSG00000100106.15	protein_coding	1842.94	0.294748	0.0787992	3.7405	0.000183654	0.00285378
BHLHE41	ENSG00000123095.5	protein_coding	919.993	0.348746	0.093387	3.73442	0.00018815	0.00292049
SFMBT1	ENSG00000163935.9	protein_coding	364.407	-0.42212	0.113075	-3.7331	0.000189137	0.00293264
NUP50	ENSG00000093000.14	protein_coding	2921.27	-0.275755	0.0738943	-3.73175	0.000190157	0.00294529
RP11-64D22.2	ENSG00000240602.3	pseudogene	175.727	-0.530555	0.142203	-3.73097	0.000190743	0.00295119
TIMM17B	ENSG00000126768.8	protein_coding	2177.25	0.42247	0.113303	3.72867	0.000192496	0.00297511
HN1L	ENSG00000206053.8	protein_coding	6217.57	-0.247175	0.0663249	-3.72673	0.000193981	0.00299484
MRAP2	ENSG00000135324.5	protein_coding	64.7511	0.617367	0.165866	3.72209	0.000197581	0.00304715
RP11-89K21.1	ENSG00000259439.1	lincRNA	171.191	0.514753	0.138314	3.72162	0.000197947	0.00304952
COL18A1	ENSG00000182871.10	protein_coding	9888.08	0.263715	0.0709307	3.71792	0.000200869	0.00309123
MVK	ENSG00000110921.7	protein_coding	2925.08	-0.322775	0.0868357	-3.71708	0.000201537	0.00309821
SNX5	ENSG00000089006.12	protein_coding	3733.27	-0.292614	0.0787412	-3.71614	0.000202289	0.00310376
RECQL4	ENSG00000160957.8	protein_coding	2157.5	-0.429061	0.11546	-3.71609	0.00020233	0.00310376
CUL7	ENSG00000044090.4	protein_coding	11686	0.249433	0.0671415	3.71504	0.000203173	0.00311006
SNTA1	ENSG00000101400.5	protein_coding	757.762	0.408622	0.109984	3.71529	0.000202972	0.00311006
PDCD1LG2	ENSG00000197646.6	protein_coding	91.3833	-0.587968	0.158318	-3.71384	0.000204142	0.00312157
RNF26	ENSG00000173456.4	protein_coding	3150.18	-0.303841	0.0819255	-3.70875	0.000208288	0.00318158
VSIG10L	ENSG00000186806.5	protein_coding	583.382	0.376986	0.101681	3.70753	0.000209289	0.00319349
SPRY1	ENSG00000164056.6	protein_coding	3958.87	-0.254989	0.0688009	-3.70619	0.000210401	0.00320706
C4A	ENSG00000244731.3	protein_coding	181.055	0.501563	0.135354	3.70555	0.000210928	0.00321169
PHF17	ENSG00000077684.11	protein_coding	2295.67	-0.274318	0.074058	-3.7041	0.000212141	0.00322675
PCSK9	ENSG00000169174.9	protein_coding	14357.1	-0.314061	0.0848528	-3.70125	0.000214542	0.00325981
PSRC1	ENSG00000134222.12	protein_coding	1222.96	-0.426736	0.115334	-3.7	0.000215596	0.00327238
HLA-DPB1	ENSG00000223865.6	protein_coding	1363.41	0.341731	0.0924035	3.69825	0.000217095	0.00329165
SURF1	ENSG00000148290.5	protein_coding	1401.09	0.320751	0.0867423	3.69774	0.000217525	0.0032947
HTATIP2	ENSG00000109854.9	protein_coding	2091.54	-0.307287	0.0831197	-3.69692	0.000218234	0.00330196
TUBA1C	ENSG00000167553.10	protein_coding	11050.6	-0.365366	0.0989652	-3.69186	0.000222617	0.00336474
IDH1	ENSG00000138413.9	protein_coding	4497.82	-0.267537	0.0724816	-3.69111	0.000223278	0.0033712
CYP1A1	ENSG00000140465.9	protein_coding	131.219	-0.549092	0.148775	-3.69076	0.000223582	0.00337225
ITPR1	ENSG00000150995.13	protein_coding	6655.81	0.384672	0.104347	3.68648	0.000227381	0.00342596
DTYMK	ENSG00000168393.8	protein_coding	1930.23	-0.370239	0.1005	-3.68399	0.000229616	0.00344879
HNRNPAB	ENSG00000197451.6	protein_coding	7273.56	-0.287706	0.0780943	-3.68409	0.000229523	0.00344879
YJEFN3	ENSG00000250067.7	protein_coding	610.154	-0.43293	0.117516	-3.684	0.000229598	0.00344879
URB2	ENSG00000135763.5	protein_coding	1005.35	-0.315652	0.0856985	-3.68329	0.000230243	0.00345461
PSD4	ENSG00000125637.11	protein_coding	423.201	0.388528	0.105507	3.68247	0.000230988	0.00346218
PAPLN	ENSG00000100767.11	protein_coding	523.022	0.401399	0.109038	3.68127	0.000232071	0.00347186
ATP9B	ENSG00000166377.15	protein_coding	1119.32	-0.321074	0.0872193	-3.68122	0.000232117	0.00347186
RCOR2	ENSG00000167771.5	protein_coding	174.789	0.50617	0.137633	3.67769	0.000235356	0.00351665
CDK6	ENSG00000105810.5	protein_coding	3408.38	-0.296997	0.0807706	-3.67704	0.000235957	0.00352197
MAN1A1	ENSG00000111885.5	protein_coding	1508.27	0.31677	0.086171	3.67607	0.000236854	0.0035317
FBXO5	ENSG00000112029.5	protein_coding	1015.67	-0.376195	0.102352	-3.67551	0.000237374	0.00353579
MTMR2	ENSG00000087053.14	protein_coding	3482.74	-0.265511	0.0722993	-3.67239	0.000240292	0.00357556
POMT1	ENSG00000130714.11	protein_coding	2343.15	0.274945	0.0748773	3.67194	0.000240713	0.00357811
NAB2	ENSG00000166886.8	protein_coding	2161.19	0.328869	0.0895726	3.67154	0.000241093	0.00358007
BCL2A1	ENSG00000140379.7	protein_coding	147.317	-0.610419	0.166314	-3.67028	0.000242283	0.00359403
FAM211B	ENSG00000178026.8	protein_coding	468.171	0.406663	0.110898	3.66701	0.000245402	0.00363656
PLEKHA7	ENSG00000166689.10	protein_coding	904.33	0.375417	0.1024	3.66617	0.000246215	0.00364484
CCL26	ENSG00000006606.4	protein_coding	245.435	0.535714	0.146138	3.66582	0.000246549	0.00364604
PCDHGC5	ENSG00000240764.2	protein_coding	50.6559	0.622146	0.169884	3.66217	0.000250087	0.00369456
SNRPA	ENSG00000077312.4	protein_coding	1871	-0.337297	0.0921208	-3.66147	0.000250774	0.00370091
DSCR3	ENSG00000157538.9	protein_coding	3454.17	0.279951	0.0764857	3.66017	0.000252045	0.00371585
RP11-268J15.5	ENSG00000116883.8	protein_coding	714.806	0.359657	0.0982703	3.65988	0.000252338	0.00371637
MAP3K15	ENSG00000180815.10	protein_coding	316.621	0.484475	0.132437	3.65816	0.000254035	0.00373754
ERVK13-1	ENSG00000260565.2	processed_transcript	529.819	0.391869	0.107186	3.65597	0.000256214	0.00376575
SUZ12	ENSG00000178691.6	protein_coding	3118.5	-0.27314	0.0747636	-3.65338	0.000258813	0.00380006
MPP3	ENSG00000161647.14	protein_coding	805.259	0.330503	0.0904726	3.65308	0.000259115	0.00380061
PPARGC1A	ENSG00000109819.4	protein_coding	504.968	0.398332	0.109081	3.65169	0.000260516	0.00381339
MLKL	ENSG00000168404.8	protein_coding	1931.15	-0.305118	0.083554	-3.65175	0.000260462	0.00381339
PLK3	ENSG00000173846.8	protein_coding	1947.91	0.303104	0.0830111	3.65137	0.000260845	0.00381432
PROX1	ENSG00000117707.11	protein_coding	482.582	0.450724	0.123602	3.64657	0.000265763	0.00387981
FCHO1	ENSG00000130475.10	protein_coding	903.624	0.347531	0.0953061	3.64648	0.000265862	0.00387981
SCML2	ENSG00000102098.13	protein_coding	167.743	-0.520551	0.1428	-3.6453	0.000267076	0.00389357
CLPP	ENSG00000125656.4	protein_coding	2978.65	0.350464	0.0962241	3.64216	0.000270361	0.00393747
ADCY10P1	ENSG00000161912.13	pseudogene	1673.4	0.363912	0.0999614	3.64053	0.00027208	0.0039585
AKAP6	ENSG00000151320.6	protein_coding	417.201	-0.430611	0.118339	-3.6388	0.000273913	0.00397713
ACSL5	ENSG00000197142.6	protein_coding	7343.71	-0.246902	0.0678526	-3.63881	0.000273905	0.00397713
CST7	ENSG00000077984.4	protein_coding	178.029	0.501592	0.137905	3.63724	0.000275577	0.00399724
C6orf223	ENSG00000181577.11	protein_coding	56.7087	-0.612629	0.168445	-3.63698	0.000275853	0.00399724
IMPAD1	ENSG00000104331.4	protein_coding	5839.69	-0.264949	0.0728571	-3.63656	0.000276307	0.00399978
SLC22A18	ENSG00000110628.9	protein_coding	1138.2	0.388014	0.106741	3.6351	0.000277873	0.00401437
RMI1	ENSG00000178966.11	protein_coding	578.822	-0.359223	0.0988183	-3.63518	0.000277784	0.00401437
RARA	ENSG00000131759.13	protein_coding	2665.05	0.307442	0.0846332	3.63263	0.000280544	0.00404889
TMX1	ENSG00000139921.8	protein_coding	3974.15	-0.283351	0.0780159	-3.63196	0.000281272	0.00405533
UQCRFS1	ENSG00000169021.4	protein_coding	4607.23	-0.28073	0.0773662	-3.6286	0.000284967	0.00410403
DNAH2	ENSG00000183914.10	protein_coding	5473.57	-0.377353	0.104001	-3.62837	0.00028522	0.00410403
PPIH	ENSG00000171960.6	protein_coding	1432.55	-0.394017	0.108624	-3.62735	0.000286342	0.00411606
P4HA2	ENSG00000072682.14	protein_coding	7791.54	0.286968	0.0791666	3.62487	0.000289112	0.00415023
HSPA1B	ENSG00000204388.5	protein_coding	782.637	-0.412992	0.113938	-3.6247	0.000289296	0.00415023
RNPC3	ENSG00000185946.11	protein_coding	1447.64	0.341663	0.0943226	3.62228	0.000292013	0.00418504
GSDMC	ENSG00000147697.4	protein_coding	86.7712	-0.572754	0.158152	-3.62155	0.000292848	0.00418865
PLA2R1	ENSG00000153246.7	protein_coding	326.806	0.419105	0.115723	3.62161	0.000292773	0.00418865
MIB1	ENSG00000101752.7	protein_coding	4502.93	0.315573	0.0871858	3.61955	0.000295118	0.00421693
KIAA0556	ENSG00000047578.8	protein_coding	1919.28	0.300154	0.0829572	3.61818	0.000296677	0.0042308
COL17A1	ENSG00000065618.12	protein_coding	836.291	-0.354753	0.0980461	-3.61823	0.00029663	0.0042308
PTP4A1	ENSG00000112245.6	protein_coding	8286.27	0.290652	0.0803383	3.61785	0.000297064	0.00423213
GINS3	ENSG00000181938.9	protein_coding	364.617	-0.451363	0.124774	-3.61744	0.000297528	0.00423455
TMEM115	ENSG00000126062.3	protein_coding	2665.77	0.31892	0.0881724	3.61701	0.00029803	0.0042375
RTKN2	ENSG00000182010.6	protein_coding	206.859	-0.499603	0.138183	-3.61553	0.000299737	0.00425756
POGLUT1	ENSG00000163389.6	protein_coding	1027.32	0.31788	0.087982	3.61302	0.000302657	0.0042948
AKR1C3	ENSG00000196139.7	protein_coding	1603.19	0.312286	0.0864622	3.61182	0.000304061	0.00431047
HLA-DPA1	ENSG00000231389.3	protein_coding	3591.07	0.348532	0.0965374	3.61033	0.000305807	0.00433097
SEC24B	ENSG00000138802.7	protein_coding	3733.21	0.306831	0.0850423	3.60798	0.000308591	0.00435753
C1orf132	ENSG00000203709.5	processed_transcript	1995.35	0.403422	0.111812	3.60802	0.000308541	0.00435753
APOBEC3G	ENSG00000239713.3	protein_coding	1373.46	0.317396	0.0879611	3.60837	0.000308126	0.00435753
DKK1	ENSG00000107984.5	protein_coding	2487.73	-0.346171	0.0959636	-3.60732	0.000309382	0.00436441
SERPING1	ENSG00000149131.11	protein_coding	155.974	0.534699	0.148287	3.60583	0.000311156	0.00438514
GPAT2	ENSG00000186281.8	protein_coding	1753.4	-0.336869	0.0934419	-3.60511	0.000312016	0.00439295
SLC7A2	ENSG00000003989.12	protein_coding	872.516	0.357102	0.0990654	3.6047	0.000312508	0.00439558
PLS3	ENSG00000102024.13	protein_coding	15593.7	-0.251224	0.0697175	-3.60346	0.00031401	0.00440808
PRIM2	ENSG00000146143.13	protein_coding	814.135	-0.3556	0.0986825	-3.60347	0.000313994	0.00440808
THEMIS2	ENSG00000130775.11	protein_coding	891.059	0.361483	0.100341	3.60253	0.000315135	0.00441957
NSUN2	ENSG00000037474.10	protein_coding	4229.18	-0.253182	0.0703288	-3.59998	0.000318238	0.00445875
GNAI1	ENSG00000127955.11	protein_coding	895.031	0.320913	0.0891665	3.59903	0.000319409	0.00447079
GPSM2	ENSG00000121957.8	protein_coding	2277.62	-0.28156	0.0782688	-3.59734	0.000321486	0.00449112
COL4A5	ENSG00000188153.8	protein_coding	2897.99	0.284439	0.0790692	3.59734	0.000321482	0.00449112
ETS1	ENSG00000134954.10	protein_coding	12269.3	-0.297269	0.0826529	-3.5966	0.000322407	0.00449963
NRGN	ENSG00000154146.8	protein_coding	424.524	-0.385049	0.107121	-3.59452	0.000324996	0.00453136
MYL9	ENSG00000101335.5	protein_coding	1252.87	0.315345	0.0877468	3.5938	0.000325885	0.00453877
RCC2	ENSG00000179051.9	protein_coding	6899.97	-0.27398	0.0762413	-3.59359	0.000326158	0.00453877
SAMSN1	ENSG00000155307.13	protein_coding	133.564	-0.528781	0.147242	-3.59124	0.000329112	0.00457545
HPSE	ENSG00000173083.10	protein_coding	343.062	-0.429019	0.119481	-3.5907	0.000329792	0.00458049
MEF2A	ENSG00000068305.13	protein_coding	4839.69	0.298549	0.0831576	3.59016	0.00033047	0.00458546
CRIM1	ENSG00000150938.5	protein_coding	8043.38	-0.276002	0.0768858	-3.58977	0.000330967	0.00458794
MANBA	ENSG00000109323.4	protein_coding	1341.13	0.347942	0.0969432	3.58914	0.000331775	0.00459471
CDC7	ENSG00000097046.8	protein_coding	940.13	-0.344793	0.0961314	-3.58668	0.000334911	0.00463369
TSEN15	ENSG00000198860.7	protein_coding	1732.22	-0.278223	0.0776111	-3.58484	0.000337286	0.00466206
DOCK11	ENSG00000147251.11	protein_coding	967.333	0.332853	0.0930469	3.57725	0.000347223	0.00479481
POT1	ENSG00000128513.10	protein_coding	1374.32	-0.289202	0.0808698	-3.57614	0.000348701	0.0048106
SSH3	ENSG00000172830.8	protein_coding	1104.66	0.37044	0.103597	3.57578	0.000349184	0.00481266
SLC46A3	ENSG00000139508.10	protein_coding	544.302	-0.384675	0.107607	-3.5748	0.000350493	0.00482607
NCEH1	ENSG00000144959.5	protein_coding	4855.05	-0.245101	0.0685704	-3.57445	0.000350966	0.00482796
KCNAB3	ENSG00000170049.5	protein_coding	86.4549	-0.588068	0.164594	-3.57285	0.000353123	0.004853
PHYKPL	ENSG00000175309.10	protein_coding	1361.3	0.298717	0.0837052	3.56868	0.000358779	0.00492602
SESTD1	ENSG00000187231.9	protein_coding	1533.15	0.337451	0.0945836	3.56775	0.000360057	0.00493886
APOL1	ENSG00000100342.16	protein_coding	1268.65	0.318278	0.089245	3.56634	0.000361997	0.00495602
PARN	ENSG00000140694.12	protein_coding	1468.81	-0.304754	0.0854491	-3.5665	0.000361782	0.00495602
COL16A1	ENSG00000084636.13	protein_coding	233.077	0.477472	0.133914	3.56552	0.000363134	0.00496686
AJUBA	ENSG00000129474.11	protein_coding	4076.52	-0.255315	0.071632	-3.56426	0.000364883	0.00498604
EHD4	ENSG00000103966.5	protein_coding	2722.06	-0.266597	0.0748229	-3.56303	0.000366592	0.00500464
CNNM4	ENSG00000158158.7	protein_coding	890.355	0.325924	0.0915243	3.56107	0.00036935	0.00503751
CDK14	ENSG00000058091.12	protein_coding	492.796	0.398427	0.111989	3.55773	0.000374073	0.00508746
SLC44A5	ENSG00000137968.12	protein_coding	1354.22	0.313062	0.0879849	3.55813	0.0003735	0.00508746
ZYX	ENSG00000159840.11	protein_coding	6245.7	0.265015	0.074488	3.55783	0.000373937	0.00508746
DNAH7	ENSG00000118997.9	protein_coding	89.2713	0.583546	0.164083	3.5564	0.000375968	0.0051084
PTBP1	ENSG00000011304.12	protein_coding	16578.6	-0.245719	0.0691966	-3.55103	0.000383723	0.00520886
PLEKHG2	ENSG00000090924.10	protein_coding	3265.01	0.279173	0.0786895	3.54778	0.000388499	0.00526736
RPL39L	ENSG00000163923.5	protein_coding	537.515	-0.46079	0.129888	-3.5476	0.000388765	0.00526736
CTSA	ENSG00000064601.12	protein_coding	16754.7	0.240412	0.0677821	3.54684	0.000389885	0.00527757
KNDC1	ENSG00000171798.13	protein_coding	49.9851	0.600307	0.169276	3.54633	0.000390642	0.00528284
SPCS2	ENSG00000118363.7	protein_coding	2895.87	0.289979	0.0817801	3.54584	0.000391365	0.00528765
RBBP7	ENSG00000102054.13	protein_coding	5930.1	-0.2807	0.0791743	-3.54534	0.00039211	0.00529276
SBNO1	ENSG00000139697.7	protein_coding	7338.43	0.305132	0.086092	3.54426	0.000393724	0.00530956
C11orf95	ENSG00000188070.8	lincRNA	3202.83	0.266663	0.0752678	3.54286	0.000395813	0.00533272
VWA1	ENSG00000179403.10	protein_coding	1681.61	0.348189	0.0983265	3.54116	0.000398377	0.00536225
SYNC	ENSG00000162520.10	protein_coding	45.1199	0.601623	0.169934	3.54033	0.000399627	0.00536903
KIAA1161	ENSG00000164976.8	protein_coding	533.447	-0.404169	0.114156	-3.54051	0.000399354	0.00536903
PRPF38A	ENSG00000134748.12	protein_coding	2646.21	-0.275021	0.077697	-3.53966	0.000400648	0.00537773
ZNF467	ENSG00000181444.8	protein_coding	488.272	0.398041	0.112461	3.53937	0.00040109	0.00537864
COIL	ENSG00000121058.4	protein_coding	1275.2	-0.291462	0.0823952	-3.53737	0.00040413	0.00540953
EWSR1	ENSG00000182944.13	protein_coding	13111.1	-0.259105	0.0732481	-3.53736	0.000404145	0.00540953
RP11-22B23.1	ENSG00000111788.9	pseudogene	163.287	-0.535024	0.151268	-3.53693	0.000404806	0.00541165
SLC20A2	ENSG00000168575.5	protein_coding	1234.07	-0.311548	0.0880883	-3.53677	0.000405056	0.00541165
CTB-175P5.4	ENSG00000269416.1	lincRNA	144.969	-0.539467	0.152576	-3.53571	0.000406674	0.00542823
SIN3B	ENSG00000127511.5	protein_coding	9153.18	0.259921	0.0735424	3.5343	0.000408854	0.00545227
BSDC1	ENSG00000160058.14	protein_coding	6152.46	0.238632	0.0675284	3.5338	0.000409636	0.00545764
FLCN	ENSG00000154803.8	protein_coding	2455.11	0.266985	0.0755622	3.53331	0.000410387	0.00546259
KDM1A	ENSG00000004487.11	protein_coding	5984.86	0.235198	0.0665905	3.532	0.000412423	0.00548462
ARRDC2	ENSG00000105643.5	protein_coding	5101.41	0.243508	0.0689889	3.52967	0.000416084	0.00552819
ACSL3	ENSG00000123983.9	protein_coding	9083.53	-0.237535	0.0673048	-3.52924	0.000416757	0.00553203
SARDH	ENSG00000123453.12	protein_coding	1599.92	-0.314295	0.0890628	-3.52892	0.00041726	0.0055336
NEIL1	ENSG00000140398.9	protein_coding	891.392	0.351149	0.099525	3.52825	0.000418312	0.00554245
GGCT	ENSG00000006625.13	protein_coding	869.908	-0.372376	0.105553	-3.52784	0.000418959	0.00554591
GARNL3	ENSG00000136895.14	protein_coding	146.61	0.530372	0.150408	3.52622	0.000421529	0.00556969
RPS6KL1	ENSG00000198208.7	protein_coding	341.339	0.406145	0.115172	3.52643	0.000421195	0.00556969
CNOT1	ENSG00000125107.12	protein_coding	12640.6	-0.240901	0.0683266	-3.52574	0.000422309	0.00557487
SEMA6A	ENSG00000092421.12	protein_coding	299.016	0.432241	0.122623	3.52496	0.000423542	0.00558602
KDELC2	ENSG00000178202.8	protein_coding	2059.43	0.262727	0.074552	3.52408	0.000424958	0.00559956
OLFML2A	ENSG00000185585.15	protein_coding	1753.55	0.367154	0.104198	3.52363	0.000425676	0.0056039
CCT5	ENSG00000150753.7	protein_coding	17014.2	-0.2833	0.0804446	-3.52167	0.000428833	0.00564029
NFKB1	ENSG00000109320.7	protein_coding	3520.23	-0.249323	0.0708095	-3.52104	0.00042985	0.00564851
NRCAM	ENSG00000091129.15	protein_coding	115.443	0.553247	0.157169	3.52009	0.000431406	0.00566378
MAPK8IP1	ENSG00000121653.7	protein_coding	722.733	0.33036	0.0939152	3.51764	0.000435398	0.00571098
CSF3	ENSG00000108342.8	protein_coding	6866.1	-0.319928	0.0909827	-3.51636	0.000437505	0.00572817
CACNB3	ENSG00000167535.3	protein_coding	838.051	0.314436	0.0894202	3.51639	0.000437463	0.00572817
CNOT3	ENSG00000088038.13	protein_coding	2967.4	0.250505	0.071251	3.51581	0.00043842	0.00573493
MLPH	ENSG00000115648.9	protein_coding	11483.4	0.233455	0.0664261	3.5145	0.000440575	0.00575788
CASC8	ENSG00000246228.2	antisense	212.26	-0.501039	0.142605	-3.51347	0.000442298	0.00577516
SRPK2	ENSG00000135250.12	protein_coding	1407.68	0.321379	0.0915001	3.51233	0.000444194	0.00579466
SGSH	ENSG00000181523.8	protein_coding	2411.67	0.274812	0.078255	3.51175	0.000445163	0.00580203
GDF5	ENSG00000125965.4	protein_coding	32.3103	0.590368	0.168242	3.50904	0.000449731	0.00585627
MAL2	ENSG00000147676.9	protein_coding	1605.42	-0.275557	0.0785432	-3.50835	0.000450903	0.00586623
KBTBD8	ENSG00000163376.7	protein_coding	331.086	-0.399526	0.113948	-3.50622	0.000454518	0.00590257
ITGA2	ENSG00000164171.6	protein_coding	47166.1	-0.262304	0.0748079	-3.50636	0.000454277	0.00590257
PSME3	ENSG00000131467.6	protein_coding	8204.02	-0.246309	0.0702696	-3.5052	0.000456263	0.0059199
DOK6	ENSG00000206052.6	protein_coding	138.609	0.54744	0.156268	3.50321	0.000459689	0.00595897
RP11-108K14.4	ENSG00000214279.8	pseudogene	338.203	0.443843	0.126976	3.4955	0.000473181	0.00612835
KAT2B	ENSG00000114166.7	protein_coding	1389.45	0.303144	0.0867835	3.49311	0.000477435	0.00617789
EVI2A	ENSG00000126860.7	protein_coding	403.064	-0.393121	0.112558	-3.49262	0.000478302	0.00617917
UGP2	ENSG00000169764.10	protein_coding	7900.94	0.28628	0.0819682	3.49257	0.000478393	0.00617917
GOLPH3L	ENSG00000143457.6	protein_coding	2369.98	-0.263432	0.0754518	-3.49139	0.000480506	0.00620089
LYPD1	ENSG00000150551.10	protein_coding	137.36	0.513461	0.147139	3.48963	0.000483692	0.00623642
FBXO45	ENSG00000174013.7	protein_coding	1506.38	-0.278968	0.0799969	-3.48723	0.000488053	0.00628701
HAUS6	ENSG00000147874.6	protein_coding	1581.02	-0.273073	0.0784202	-3.48218	0.000497354	0.0064011
ARVCF	ENSG00000099889.9	protein_coding	645.831	0.368991	0.10602	3.4804	0.000500668	0.00643799
RASA4	ENSG00000105808.13	protein_coding	250.034	0.443172	0.127523	3.47523	0.000510416	0.00655748
GSTA4	ENSG00000170899.6	protein_coding	849.109	0.36745	0.105747	3.47479	0.000511255	0.00656239
TCF19	ENSG00000137310.7	protein_coding	342.188	-0.465936	0.134223	-3.47136	0.000517833	0.00664091
SEC23B	ENSG00000101310.10	protein_coding	6699.11	-0.24476	0.0705671	-3.46847	0.000523428	0.00670669
BET1	ENSG00000105829.7	protein_coding	748.837	0.36151	0.104238	3.46814	0.000524082	0.00670909
SHISA4	ENSG00000198892.6	protein_coding	1734.99	0.338465	0.097621	3.46713	0.000526046	0.00672825
PHTF2	ENSG00000006576.12	protein_coding	1005.03	-0.310982	0.089821	-3.46225	0.000535688	0.00684549
SEMA6D	ENSG00000137872.11	protein_coding	161.532	0.525692	0.151892	3.46096	0.000538261	0.00687226
SYTL3	ENSG00000164674.11	protein_coding	163.941	-0.516697	0.149316	-3.46042	0.000539343	0.00687997
ZNF816	ENSG00000180257.8	protein_coding	301.239	0.418011	0.120837	3.45931	0.000541561	0.00690214
USP38	ENSG00000170185.5	protein_coding	1771.72	0.298047	0.0862142	3.45705	0.000546126	0.00695416
NLRP2	ENSG00000022556.11	protein_coding	521.575	-0.363599	0.105246	-3.45475	0.000550811	0.00700143
RP11-431K24.1	ENSG00000238290.1	lincRNA	137.52	-0.501451	0.145139	-3.45497	0.000550349	0.00700143
KAT5	ENSG00000172977.8	protein_coding	1776.99	0.3302	0.0955995	3.45399	0.000552362	0.00701495
CD82	ENSG00000085117.7	protein_coding	7872.77	-0.271779	0.0787075	-3.45303	0.000554325	0.00702128
ALDOC	ENSG00000109107.9	protein_coding	2225.6	0.326178	0.0944588	3.45312	0.000554134	0.00702128
ADK	ENSG00000156110.9	protein_coding	2985.44	-0.292389	0.084672	-3.4532	0.000553988	0.00702128
HYAL2	ENSG00000068001.9	protein_coding	2827.54	0.325671	0.0943314	3.45241	0.000555594	0.00703117
CCBE1	ENSG00000183287.9	protein_coding	208.821	-0.454827	0.131925	-3.44761	0.000565567	0.00715109
HOOK2	ENSG00000095066.7	protein_coding	2846.69	0.306606	0.0889726	3.44607	0.000568807	0.00718575
EIF2B2	ENSG00000119718.6	protein_coding	4711.11	0.264645	0.0768139	3.44528	0.000570473	0.00720047
PACSIN3	ENSG00000165912.11	protein_coding	1791.23	0.282629	0.0820432	3.44489	0.000571299	0.00720458
FARSB	ENSG00000116120.8	protein_coding	1582.57	-0.303781	0.0881935	-3.44448	0.000572154	0.00720858
CDK2	ENSG00000123374.6	protein_coding	1910.31	-0.318235	0.0923956	-3.44426	0.000572619	0.00720858
DENND6B	ENSG00000205593.7	protein_coding	244.679	0.428977	0.124611	3.44254	0.000576288	0.00724843
PRDM4	ENSG00000110851.7	protein_coding	4856.98	-0.231575	0.0673358	-3.43911	0.00058363	0.00732972
ARMCX1	ENSG00000126947.7	protein_coding	2657.71	0.251468	0.0731213	3.43905	0.000583769	0.00732972
SLC6A9	ENSG00000196517.7	protein_coding	3069.35	0.293127	0.0852681	3.43771	0.000586657	0.00735955
PIGN	ENSG00000197563.5	protein_coding	888.95	0.346584	0.100858	3.43635	0.000589608	0.00739013
PRPF4	ENSG00000136875.8	protein_coding	3078.74	-0.264254	0.0769144	-3.43569	0.000591055	0.00740182
SRRM2-AS1	ENSG00000205913.2	antisense	40.3496	0.5837	0.169935	3.43485	0.000592886	0.0074183
SMS	ENSG00000102172.11	protein_coding	7598.17	-0.263468	0.0767145	-3.4344	0.000593865	0.00742409
CELSR1	ENSG00000075275.12	protein_coding	2747.41	0.289469	0.0843148	3.43319	0.000596524	0.00745086
TCAIM	ENSG00000179152.14	protein_coding	2027.27	0.282035	0.0821887	3.43156	0.00060012	0.00748927
CNPY4	ENSG00000166997.3	protein_coding	796.89	0.335901	0.0978989	3.4311	0.00060114	0.00749549
C11orf35	ENSG00000185522.4	protein_coding	441.621	0.408729	0.119135	3.43082	0.000601758	0.0074967
C21orf58	ENSG00000160298.13	protein_coding	212.377	-0.510087	0.148706	-3.43018	0.000603181	0.00750144
ORAI2	ENSG00000160991.11	protein_coding	2465.58	0.261604	0.0762651	3.4302	0.000603146	0.00750144
ADAMTS16	ENSG00000145536.11	protein_coding	705.862	-0.438314	0.127804	-3.42957	0.000604529	0.00751171
VEPH1	ENSG00000197415.7	protein_coding	168.598	-0.4654	0.135712	-3.42933	0.00060508	0.00751208
KCTD17	ENSG00000100379.13	protein_coding	774.315	0.314418	0.0917213	3.42798	0.000608096	0.00754301
FAM135A	ENSG00000082269.12	protein_coding	636.345	0.37092	0.108228	3.42721	0.000609814	0.0075578
MCC	ENSG00000171444.13	protein_coding	989.919	0.376555	0.109917	3.42582	0.000612943	0.00759005
CAPS	ENSG00000105519.8	protein_coding	408.845	0.414538	0.121058	3.42429	0.000616409	0.00762254
SURF4	ENSG00000148248.9	protein_coding	16720.9	0.24024	0.0701597	3.42419	0.000616626	0.00762254
SIAE	ENSG00000110013.8	protein_coding	1901.57	0.272125	0.0794812	3.42377	0.000617595	0.00762797
AP1M2	ENSG00000129354.7	protein_coding	232.402	-0.468484	0.136858	-3.42313	0.000619056	0.00763945
TGFBR1	ENSG00000106799.8	protein_coding	6057.93	0.302251	0.0883861	3.41967	0.000626976	0.00773056
SHQ1	ENSG00000144736.9	protein_coding	966.782	-0.294024	0.0860152	-3.41827	0.000630196	0.00776361
CYB5R2	ENSG00000166394.10	protein_coding	1186.29	0.304523	0.0891665	3.41522	0.000637303	0.00784445
ATOH8	ENSG00000168874.8	protein_coding	112.335	0.50948	0.149403	3.41012	0.000649352	0.00798592
SENP1	ENSG00000079387.9	protein_coding	1052.3	-0.291897	0.0856098	-3.40962	0.000650525	0.00799351
PHGDH	ENSG00000092621.7	protein_coding	1030	-0.361959	0.106197	-3.40837	0.000653526	0.00802353
HSPB1	ENSG00000106211.8	protein_coding	5127.62	0.333926	0.0980122	3.40699	0.000656846	0.00805742
DPYSL3	ENSG00000113657.8	protein_coding	891.432	0.315029	0.0924826	3.40636	0.000658355	0.00806906
GOT2	ENSG00000125166.8	protein_coding	3642.36	-0.264588	0.0777009	-3.40521	0.000661135	0.00809624
RP11-1407O15.2	ENSG00000174093.6	protein_coding	947.306	0.327535	0.0962293	3.40369	0.000664811	0.00813433
NAGA	ENSG00000198951.7	protein_coding	1459.77	-0.282515	0.0830411	-3.40212	0.000668658	0.00817444
TFEB	ENSG00000112561.13	protein_coding	316.869	0.398794	0.117244	3.4014	0.00067042	0.00818903
CTNNA1	ENSG00000044115.16	protein_coding	65366.8	-0.218653	0.0643001	-3.40051	0.000672596	0.00820863
MYCBP	ENSG00000214114.4	protein_coding	864.566	-0.327523	0.09635	-3.3993	0.000675581	0.00823808
ENOX2	ENSG00000165675.12	protein_coding	979.02	-0.307881	0.0906051	-3.39805	0.000678675	0.00826881
PXK	ENSG00000168297.11	protein_coding	1274.53	0.276921	0.0815221	3.39688	0.000681586	0.00829724
SLC35D1	ENSG00000116704.6	protein_coding	1246.02	0.291607	0.0859071	3.39445	0.000687673	0.00836426
TMEM109	ENSG00000110108.5	protein_coding	6158.52	-0.278117	0.0819428	-3.39404	0.000688704	0.00836973
IGF2BP2	ENSG00000073792.11	protein_coding	3760	-0.271942	0.080131	-3.39372	0.00068951	0.00837245
GOT1	ENSG00000120053.9	protein_coding	2842.45	-0.27778	0.0818674	-3.39305	0.000691193	0.00837875
HSPA13	ENSG00000155304.4	protein_coding	4977.35	-0.243253	0.0716886	-3.3932	0.000690822	0.00837875
EFR3A	ENSG00000132294.9	protein_coding	5097.66	-0.255145	0.075208	-3.39253	0.000692497	0.00838749
RRAGC	ENSG00000116954.7	protein_coding	2875.69	0.272491	0.0803492	3.39133	0.000695542	0.00841729
RHOU	ENSG00000116574.4	protein_coding	559.548	0.393326	0.116024	3.39005	0.000698802	0.00844964
SGMS2	ENSG00000164023.10	protein_coding	1796.95	-0.284458	0.0839168	-3.38977	0.000699522	0.00845123
GEN1	ENSG00000178295.10	protein_coding	795.16	-0.323019	0.0953787	-3.38669	0.0007074	0.00853924
SFXN1	ENSG00000164466.8	protein_coding	3510.39	-0.244426	0.0721964	-3.38557	0.000710309	0.00856717
TSPYL2	ENSG00000184205.10	protein_coding	2557.85	-0.260562	0.0769798	-3.38481	0.000712283	0.00858378
AC093673.5	ENSG00000232533.1	antisense	170.734	-0.48616	0.143658	-3.38415	0.000713992	0.00859718
SSBP4	ENSG00000130511.11	protein_coding	2533.87	0.26773	0.0791457	3.38275	0.000717645	0.00863394
RHOQ	ENSG00000119729.6	protein_coding	1509.12	0.316022	0.0934669	3.38111	0.000721932	0.00867314
DACT2	ENSG00000164488.7	protein_coding	83.9134	-0.545562	0.161359	-3.38104	0.000722109	0.00867314
NOP58	ENSG00000055044.6	protein_coding	2665.69	-0.268652	0.0794928	-3.37957	0.00072599	0.00870522
RUVBL1	ENSG00000175792.7	protein_coding	2307.08	-0.302122	0.0893914	-3.37976	0.000725481	0.00870522
PPDPF	ENSG00000125534.5	protein_coding	4042.94	0.304743	0.0902232	3.37766	0.000731055	0.00875639
PLEKHG5	ENSG00000171680.16	protein_coding	786.611	0.330439	0.0978353	3.3775	0.000731474	0.00875639
ERLIN1	ENSG00000107566.9	protein_coding	3587.26	-0.260933	0.0772668	-3.37704	0.000732695	0.00876372
LRR1	ENSG00000165501.12	protein_coding	725.698	-0.360333	0.106719	-3.37647	0.000734231	0.0087748
GBP1	ENSG00000117228.9	protein_coding	1301.07	-0.299702	0.0888202	-3.37426	0.000740152	0.00883089
IREB2	ENSG00000136381.8	protein_coding	2741.34	-0.259794	0.0769927	-3.37427	0.000740113	0.00883089
CEP85	ENSG00000130695.9	protein_coding	2233.76	-0.300587	0.0891001	-3.37359	0.000741945	0.00883763
LCLAT1	ENSG00000172954.9	protein_coding	1187.29	-0.278645	0.0825921	-3.37375	0.00074152	0.00883763
RARG	ENSG00000172819.12	protein_coding	2169.62	0.258508	0.0766422	3.37292	0.000743749	0.00885179
CXADR	ENSG00000154639.14	protein_coding	614.491	-0.327483	0.0971075	-3.37238	0.000745222	0.00886199
FOXO6	ENSG00000204060.4	protein_coding	47.5514	0.57087	0.169403	3.36989	0.000751995	0.00893514
PSMD2	ENSG00000175166.12	protein_coding	26082.9	-0.225508	0.0669358	-3.36902	0.000754359	0.00895583
UCKL1	ENSG00000198276.9	protein_coding	4279.65	0.271027	0.080453	3.36876	0.000755064	0.00895682
THOP1	ENSG00000172009.10	protein_coding	2721.62	-0.325714	0.0966965	-3.36842	0.000756006	0.0089606
R3HDM2	ENSG00000179912.15	protein_coding	1097.3	0.338437	0.100567	3.36531	0.000764583	0.0090548
IL27RA	ENSG00000104998.2	protein_coding	1423.99	0.276495	0.0822095	3.3633	0.000770176	0.00911324
BAIAP2-AS1	ENSG00000226137.3	lincRNA	945.792	0.301064	0.0895204	3.36308	0.000770784	0.00911324
AZIN1	ENSG00000155096.9	protein_coding	8506.74	-0.22042	0.0655825	-3.36096	0.000776723	0.00917446
OXA1L	ENSG00000155463.8	protein_coding	5689.88	0.235466	0.0700677	3.36055	0.000777874	0.00917446
TCAP	ENSG00000173991.5	protein_coding	246.892	0.421807	0.125514	3.36063	0.000777662	0.00917446
TMEM8A	ENSG00000129925.6	protein_coding	4987.64	0.277831	0.082685	3.36012	0.000779087	0.00917975
CXorf61	ENSG00000204019.4	protein_coding	170.337	-0.476836	0.141918	-3.35994	0.000779599	0.00917975
ZFAND6	ENSG00000086666.14	protein_coding	2716.55	0.300768	0.0895317	3.35934	0.000781278	0.00919199
RCN3	ENSG00000142552.3	protein_coding	340.369	0.379816	0.113097	3.35832	0.000784178	0.00921858
MYC	ENSG00000136997.10	protein_coding	8063.51	-0.23858	0.0710586	-3.35751	0.000786488	0.00923819
HNRNPH3	ENSG00000096746.13	protein_coding	7635.47	-0.231499	0.0689878	-3.35566	0.000791767	0.00929261
ACACA	ENSG00000132142.15	protein_coding	7526.83	-0.262198	0.0781544	-3.35487	0.000794036	0.00931164
CACYBP	ENSG00000116161.13	protein_coding	4723.07	-0.272801	0.0813361	-3.35399	0.000796543	0.00933343
RMI2	ENSG00000175643.7	protein_coding	383.912	-0.366942	0.109436	-3.35302	0.000799336	0.00935854
SRP54	ENSG00000100883.7	protein_coding	4508.98	-0.245066	0.0731467	-3.35033	0.00080715	0.00944234
CREB5	ENSG00000146592.12	protein_coding	214.939	0.475983	0.142108	3.34944	0.000809755	0.00946512
ZNF618	ENSG00000157657.10	protein_coding	1616.6	0.283816	0.0847562	3.34862	0.00081216	0.00948552
NASP	ENSG00000132780.12	protein_coding	6516.3	-0.262058	0.0782669	-3.34826	0.000813219	0.00949019
NUDC	ENSG00000090273.9	protein_coding	7790.05	-0.259104	0.0774512	-3.34539	0.000821673	0.0095779
KIAA1109	ENSG00000138688.11	protein_coding	7285.78	0.251964	0.0753197	3.34526	0.000822066	0.0095779
PTPRJ	ENSG00000149177.8	protein_coding	8934.91	-0.275719	0.0824639	-3.34351	0.000827249	0.00963049
RNF215	ENSG00000099999.10	protein_coding	1510.04	0.282055	0.0844893	3.33835	0.00084278	0.00979629
MAU2	ENSG00000129933.16	protein_coding	4651.07	0.237582	0.071168	3.33832	0.000842853	0.00979629
TP53INP1	ENSG00000164938.9	protein_coding	2245.68	0.30981	0.0928566	3.33644	0.000848594	0.00985506
ROBO1	ENSG00000169855.15	protein_coding	5175.4	0.278379	0.0835014	3.33382	0.000856626	0.00994032
HTATSF1	ENSG00000102241.7	protein_coding	5490.61	-0.24269	0.0728332	-3.33213	0.000861836	0.00999271
EFEMP1	ENSG00000115380.14	protein_coding	631.597	-0.332593	0.0998379	-3.33133	0.000864321	0.0100135
MBTPS1	ENSG00000140943.12	protein_coding	9180.19	0.233667	0.0701494	3.33099	0.000865391	0.0100153
RP5-857K21.11	ENSG00000198744.5	pseudogene	12304.2	-0.354854	0.106536	-3.33083	0.000865873	0.0100153
TRIM5	ENSG00000132256.14	protein_coding	1733.92	-0.270793	0.0813331	-3.32943	0.000870233	0.0100559
ABCA3	ENSG00000167972.9	protein_coding	2348.98	0.260511	0.078249	3.32926	0.000870777	0.0100559
TDG	ENSG00000139372.10	protein_coding	3295.96	-0.268974	0.0808263	-3.3278	0.000875349	0.0100859
SUCLG1	ENSG00000163541.7	protein_coding	2443.68	0.279147	0.0838845	3.32776	0.000875478	0.0100859
POM121	ENSG00000196313.7	protein_coding	2280.14	0.288914	0.0868152	3.32792	0.000874968	0.0100859
RUNX2	ENSG00000124813.16	protein_coding	1751.56	0.324427	0.0974988	3.3275	0.000876292	0.0100872
GABRR2	ENSG00000111886.9	protein_coding	566.648	0.406727	0.122291	3.32591	0.000881316	0.0101369
C17orf62	ENSG00000178927.12	protein_coding	4422.18	0.240831	0.0724178	3.32558	0.00088235	0.0101407
PDZD2	ENSG00000133401.11	protein_coding	290.526	-0.422079	0.126998	-3.3235	0.000888968	0.0102086
PARP1	ENSG00000143799.8	protein_coding	6988.38	-0.275774	0.0830117	-3.32211	0.000893392	0.0102512
C16orf59	ENSG00000162062.10	protein_coding	235.874	-0.509792	0.153502	-3.32108	0.000896689	0.0102808
TPR	ENSG00000047410.9	protein_coding	13732.3	-0.220307	0.0663431	-3.32072	0.000897846	0.0102853
TRMT6	ENSG00000089195.10	protein_coding	2159.69	0.245483	0.073934	3.32029	0.000899225	0.0102853
LRRC56	ENSG00000161328.10	protein_coding	136.678	0.489343	0.147376	3.32037	0.000898973	0.0102853
LTV1	ENSG00000135521.8	protein_coding	1804.35	-0.265939	0.080143	-3.31831	0.00090565	0.0103506
AQR	ENSG00000021776.6	protein_coding	2666.89	-0.242363	0.0730538	-3.3176	0.00090795	0.0103686
MIR4435-1HG	ENSG00000172965.10	lincRNA	1610.49	-0.274857	0.0828589	-3.31717	0.000909337	0.0103763
EPDR1	ENSG00000086289.7	protein_coding	1362.96	-0.270985	0.0817189	-3.31607	0.00091294	0.0104043
NLRC5	ENSG00000140853.11	protein_coding	1768.81	0.287694	0.0867601	3.31597	0.000913242	0.0104043
SPG20	ENSG00000133104.8	protein_coding	3149.38	-0.246646	0.0743926	-3.31546	0.000914926	0.0104152
EBI3	ENSG00000105246.5	protein_coding	1005.47	0.308218	0.0929854	3.31469	0.000917456	0.0104358
ADAM10	ENSG00000137845.10	protein_coding	6195.28	-0.222081	0.0670755	-3.31091	0.00092994	0.0105694
FLJ27365	ENSG00000197182.8	protein_coding	211.977	0.431174	0.130264	3.30999	0.000932978	0.0105956
PDZK1IP1	ENSG00000162366.3	protein_coding	990.932	0.391133	0.118214	3.30869	0.000937351	0.0106326
JAG2	ENSG00000184916.4	protein_coding	423.605	0.370491	0.111979	3.30858	0.000937711	0.0106326
DOCK4	ENSG00000128512.15	protein_coding	4105.41	-0.25437	0.0769433	-3.30595	0.000946563	0.0107245
FADS2	ENSG00000134824.9	protein_coding	26368	-0.251865	0.0762581	-3.3028	0.000957255	0.0108371
MT-ND1	ENSG00000198888.2	protein_coding	113140	-0.222704	0.0674632	-3.30112	0.000962989	0.0108934
STX2	ENSG00000111450.9	protein_coding	1348.9	0.341559	0.10354	3.29881	0.000970947	0.0109748
PPP2R2C	ENSG00000074211.9	protein_coding	2284.44	0.295691	0.0896531	3.29816	0.00097319	0.0109811
YEATS4	ENSG00000127337.2	protein_coding	728.05	-0.368868	0.111846	-3.29799	0.000973788	0.0109811
MAPK8IP3	ENSG00000138834.8	protein_coding	8346.17	0.229452	0.0695701	3.29814	0.000973269	0.0109811
MGME1	ENSG00000125871.9	protein_coding	1652.82	-0.291773	0.0885258	-3.29591	0.000981051	0.0110543
ZNF714	ENSG00000160352.11	protein_coding	295.038	-0.408236	0.123907	-3.2947	0.000985268	0.0110931
PDPR	ENSG00000090857.9	protein_coding	1987.05	0.319528	0.0970109	3.29374	0.000988649	0.0111077
HBP1	ENSG00000105856.9	protein_coding	4964.36	0.247845	0.0752468	3.29376	0.000988563	0.0111077
ZNF436	ENSG00000125945.10	protein_coding	3005.34	0.248481	0.0754421	3.29367	0.000988879	0.0111077
NES	ENSG00000132688.10	protein_coding	4879.05	0.262764	0.0797907	3.29316	0.000990681	0.0111193
RRM2B	ENSG00000048392.7	protein_coding	2001.88	0.273117	0.0829535	3.29241	0.000993333	0.0111404
TCHP	ENSG00000139437.13	protein_coding	1585.77	-0.29042	0.0882335	-3.29149	0.000996582	0.0111681
AR	ENSG00000169083.11	protein_coding	1006.65	-0.337668	0.102726	-3.28708	0.00101232	0.0113356
HECA	ENSG00000112406.4	protein_coding	1381.38	0.384052	0.116871	3.28611	0.00101581	0.0113483
KCNIP3	ENSG00000115041.8	protein_coding	508.907	0.348908	0.106163	3.28653	0.00101432	0.0113483
MCM8	ENSG00000125885.9	protein_coding	1377.2	-0.328231	0.0998845	-3.28611	0.00101582	0.0113483
CAPNS1	ENSG00000126247.6	protein_coding	29114.5	0.25149	0.0765379	3.28582	0.00101685	0.011351
BLZF1	ENSG00000117475.9	protein_coding	1824.64	0.281417	0.0856574	3.28538	0.00101846	0.0113602
CTD-2044J15.2	ENSG00000272520.1	lincRNA	352.234	-0.385098	0.117252	-3.28436	0.00102215	0.0113925
FGF14	ENSG00000102466.11	protein_coding	204.281	-0.44577	0.135748	-3.2838	0.00102418	0.0114063
TUBA4A	ENSG00000127824.9	protein_coding	2040.03	-0.30835	0.0939454	-3.28223	0.0010299	0.0114612
PARP9	ENSG00000138496.12	protein_coding	1595.34	0.263079	0.0801642	3.28175	0.00103164	0.0114716
CTD-2369P2.2	ENSG00000175898.4	lincRNA	175.984	0.450044	0.137145	3.28151	0.00103251	0.0114725
ST6GALNAC6	ENSG00000160408.10	protein_coding	4551.07	0.241926	0.0737909	3.27854	0.00104347	0.0115852
SRPX2	ENSG00000102359.5	protein_coding	959.918	0.287395	0.0876679	3.27823	0.00104462	0.011589
MXI1	ENSG00000119950.16	protein_coding	4772.72	0.294995	0.0899941	3.27794	0.00104567	0.0115918
ULK1	ENSG00000177169.5	protein_coding	3187.45	0.274938	0.0839525	3.27492	0.00105691	0.0117073
GEMIN2	ENSG00000092208.12	protein_coding	532.606	-0.351364	0.107297	-3.27468	0.0010578	0.0117083
PPAT	ENSG00000128059.4	protein_coding	990.452	-0.281505	0.0859789	-3.27411	0.00105994	0.0117187
MED14	ENSG00000180182.6	protein_coding	2967.2	-0.237584	0.0725671	-3.274	0.00106038	0.0117187
CTSF	ENSG00000174080.6	protein_coding	6048.2	0.277333	0.0847416	3.27269	0.0010653	0.0117641
ZNF331	ENSG00000130844.12	protein_coding	759.672	-0.321943	0.0984471	-3.27022	0.00107465	0.0118582
TMEM237	ENSG00000155755.14	protein_coding	1043.74	-0.309455	0.0946382	-3.26987	0.00107597	0.0118637
METTL3	ENSG00000165819.7	protein_coding	1804.42	-0.265766	0.081381	-3.2657	0.00109193	0.0120305
ADRA1B	ENSG00000170214.3	protein_coding	322.691	0.411399	0.125996	3.26519	0.00109391	0.012043
FAM89B	ENSG00000176973.7	protein_coding	480.811	0.379137	0.116154	3.2641	0.00109814	0.0120804
ARMC2	ENSG00000118690.8	protein_coding	136.266	0.481043	0.147385	3.26386	0.00109906	0.0120812
CCDC47	ENSG00000108588.9	protein_coding	6071.89	-0.221598	0.0679151	-3.26287	0.0011029	0.0121143
TBC1D16	ENSG00000167291.11	protein_coding	5338.31	0.248037	0.0760236	3.26264	0.00110381	0.0121149
NRIP2	ENSG00000053702.10	protein_coding	48.5459	0.553994	0.169823	3.26218	0.0011056	0.0121163
NMNAT2	ENSG00000157064.6	protein_coding	3793.25	0.277268	0.0849948	3.26217	0.00110561	0.0121163
POP7	ENSG00000172336.4	protein_coding	1135.28	-0.337483	0.103481	-3.26131	0.001109	0.0121441
AMH	ENSG00000104899.4	protein_coding	438.111	-0.397621	0.121945	-3.26065	0.00111156	0.0121629
ABCA1	ENSG00000165029.11	protein_coding	5040.05	0.283206	0.0869239	3.2581	0.00112161	0.0122636
SLC27A1	ENSG00000130304.12	protein_coding	4922.07	0.232935	0.0715098	3.25739	0.00112443	0.0122757
PADI3	ENSG00000142619.4	protein_coding	54.848	0.548112	0.16826	3.25754	0.00112384	0.0122757
PGM2L1	ENSG00000165434.6	protein_coding	1606.17	0.30111	0.0924741	3.25616	0.0011293	0.0123196
TMEM45A	ENSG00000181458.6	protein_coding	2091.29	0.388077	0.119264	3.25393	0.00113819	0.0124071
PTCHD3P1	ENSG00000224597.5	antisense	1245.46	0.282852	0.0869412	3.25337	0.00114045	0.0124224
ATF6B	ENSG00000213676.6	protein_coding	5525.35	0.248526	0.0764517	3.25075	0.001151	0.012522
AC002480.4	ENSG00000232949.1	antisense	83.6716	-0.526988	0.162117	-3.25067	0.00115134	0.012522
PPIP5K1	ENSG00000168781.17	protein_coding	1570.31	-0.310919	0.095683	-3.24947	0.00115619	0.0125653
UBE3C	ENSG00000009335.13	protein_coding	8180.71	-0.214505	0.0661026	-3.24504	0.00117436	0.0127531
PHF7	ENSG00000010318.15	protein_coding	395.868	-0.370397	0.114174	-3.24414	0.00117805	0.0127835
SNRPA1	ENSG00000131876.12	protein_coding	1756.24	-0.280195	0.0864484	-3.24118	0.00119035	0.0129073
PLCD3	ENSG00000161714.7	protein_coding	5461.94	0.231767	0.0715403	3.23967	0.00119668	0.0129661
MFGE8	ENSG00000140545.10	protein_coding	10244.7	0.234026	0.0722603	3.23865	0.00120095	0.0130026
NOL3	ENSG00000140939.10	protein_coding	3135.67	0.304764	0.0941236	3.23791	0.00120407	0.0130197
C14orf80	ENSG00000185347.13	protein_coding	725.255	-0.401169	0.1239	-3.23785	0.00120434	0.0130197
TRPS1	ENSG00000104447.7	protein_coding	2483.39	0.293927	0.0908401	3.23565	0.00121366	0.0131106
SCRN2	ENSG00000141295.9	protein_coding	1390.76	0.298342	0.0922107	3.23543	0.00121459	0.0131108
AMMECR1	ENSG00000101935.5	protein_coding	952.571	-0.283153	0.0875379	-3.23463	0.00121799	0.0131377
ZNF846	ENSG00000196605.3	protein_coding	386.584	0.405206	0.125327	3.23318	0.0012242	0.0131948
ZNF90	ENSG00000213988.5	protein_coding	119.623	-0.508236	0.157236	-3.23231	0.00122792	0.013215
AC068580.6	ENSG00000235027.1	antisense	217.517	0.441136	0.136474	3.23239	0.0012276	0.013215
CCDC57	ENSG00000176155.14	protein_coding	3686.39	0.229866	0.071145	3.23095	0.00123378	0.0132682
ACER3	ENSG00000078124.7	protein_coding	2363.82	-0.285229	0.0883267	-3.22925	0.00124115	0.0133176
SPINK5	ENSG00000133710.11	protein_coding	82.6963	-0.522026	0.161648	-3.2294	0.0012405	0.0133176
PTGES	ENSG00000148344.10	protein_coding	4915.2	-0.310651	0.0961961	-3.22935	0.00124072	0.0133176
PI3	ENSG00000124102.4	protein_coding	493.121	-0.399837	0.12387	-3.22788	0.0012471	0.0133616
CFB	ENSG00000243649.4	protein_coding	1401.13	0.323944	0.100354	3.22803	0.00124645	0.0133616
TAOK2	ENSG00000149930.13	protein_coding	4214.1	0.22638	0.0701381	3.22764	0.00124817	0.0133631
SSH2	ENSG00000141298.13	protein_coding	1995.81	-0.265786	0.082359	-3.22716	0.00125024	0.0133752
DHX15	ENSG00000109606.8	protein_coding	12913.3	-0.220706	0.0684056	-3.22643	0.00125347	0.0133998
ATAD3A	ENSG00000197785.9	protein_coding	2374.29	-0.287312	0.0890731	-3.22557	0.0012572	0.0134099
HYLS1	ENSG00000198331.6	protein_coding	968.656	-0.312791	0.0969711	-3.22561	0.00125703	0.0134099
ZNF69	ENSG00000198429.5	protein_coding	486.849	0.379866	0.117759	3.22579	0.00125627	0.0134099
STRA6	ENSG00000137868.14	protein_coding	247.048	0.416399	0.129188	3.2232	0.00126768	0.0135116
ALDH1L1	ENSG00000144908.9	protein_coding	153.319	0.456973	0.141808	3.22247	0.00127093	0.0135362
NUP188	ENSG00000095319.10	protein_coding	7043.45	-0.240178	0.0745927	-3.21986	0.00128253	0.0136496
CCNH	ENSG00000134480.9	protein_coding	1486.18	-0.266315	0.0827156	-3.21965	0.00128349	0.0136498
ARMC12	ENSG00000157343.4	protein_coding	205.774	0.423935	0.131697	3.21902	0.00128632	0.0136697
OCEL1	ENSG00000099330.4	protein_coding	2057.58	0.298914	0.092883	3.21818	0.00129009	0.0136896
AIM1	ENSG00000112297.10	protein_coding	4264.46	-0.227085	0.0705623	-3.21822	0.00128989	0.0136896
GNE	ENSG00000159921.10	protein_coding	4210.59	-0.232988	0.0724191	-3.21722	0.0012944	0.0137252
CCDC69	ENSG00000198624.8	protein_coding	6260.61	0.222682	0.069226	3.21674	0.00129656	0.013738
BCAS4	ENSG00000124243.13	protein_coding	225.671	0.421271	0.131125	3.21275	0.00131469	0.0139123
KRT86	ENSG00000170442.7	protein_coding	253.672	0.451908	0.140663	3.2127	0.00131494	0.0139123
ANKRD29	ENSG00000154065.12	protein_coding	2183.1	0.305843	0.0952074	3.21239	0.00131637	0.0139171
FBXL4	ENSG00000112234.4	protein_coding	2182.2	0.277223	0.0863499	3.21046	0.00132522	0.0140005
PLAC9	ENSG00000189129.9	protein_coding	35.5035	0.542579	0.169087	3.20888	0.00133251	0.0140671
HSPA14	ENSG00000187522.9	protein_coding	1851.37	-0.273009	0.0850879	-3.20856	0.00133403	0.0140728
JMY	ENSG00000152409.8	protein_coding	1852.62	0.314882	0.0981956	3.20668	0.00134277	0.0141547
TNPO3	ENSG00000064419.9	protein_coding	3328.04	-0.241528	0.0753899	-3.20372	0.00135663	0.0142834
PLAU	ENSG00000122861.11	protein_coding	4604.27	-0.249163	0.0777755	-3.20362	0.00135712	0.0142834
PCDH20	ENSG00000197991.10	protein_coding	363.749	-0.368093	0.114906	-3.20344	0.00135796	0.0142834
APTX	ENSG00000137074.14	protein_coding	1640.14	-0.283089	0.0883775	-3.20318	0.0013592	0.014286
ZNF658	ENSG00000196409.7	protein_coding	199.57	0.419107	0.130893	3.20189	0.00136527	0.0143394
ZNF561	ENSG00000171469.6	protein_coding	2139.16	0.246474	0.0769991	3.20099	0.00136955	0.0143738
CENPO	ENSG00000138092.6	protein_coding	931.255	-0.333416	0.104293	-3.19692	0.00138902	0.0145581
MT-CYB	ENSG00000198727.2	protein_coding	124861	-0.218524	0.0683549	-3.1969	0.00138914	0.0145581
SCN1B	ENSG00000105711.6	protein_coding	125.791	0.486742	0.152347	3.19497	0.00139847	0.0146346
SPANXB2	ENSG00000227234.1	protein_coding	83.7298	-0.516999	0.161807	-3.19516	0.00139752	0.0146346
GCA	ENSG00000115271.6	protein_coding	562.624	0.31654	0.0991384	3.19291	0.00140847	0.0147286
LCP1	ENSG00000136167.9	protein_coding	281.417	-0.397396	0.124474	-3.19261	0.00140993	0.0147331
IGSF8	ENSG00000162729.9	protein_coding	1974.54	0.303284	0.0950098	3.19214	0.00141224	0.0147359
RP11-381E24.1	ENSG00000241634.1	pseudogene	55.1609	-0.539286	0.168938	-3.19221	0.00141187	0.0147359
AK4	ENSG00000162433.10	protein_coding	9230.67	0.262192	0.0821994	3.1897	0.00142419	0.0148497
RBM14	ENSG00000239306.4	protein_coding	2180.14	-0.251163	0.078759	-3.18901	0.00142762	0.0148747
MTHFD2	ENSG00000065911.7	protein_coding	1123.93	-0.287473	0.0901516	-3.18877	0.00142877	0.014876
PRRC2B	ENSG00000130723.13	protein_coding	14988.3	0.257405	0.0807745	3.18671	0.00143902	0.0149719
ZFR	ENSG00000056097.11	protein_coding	9745.77	0.237218	0.0744483	3.18634	0.00144085	0.0149801
TEAD3	ENSG00000007866.14	protein_coding	3396.22	0.23505	0.0737766	3.18597	0.00144269	0.0149845
RNF4	ENSG00000063978.11	protein_coding	6628.29	-0.254499	0.0798844	-3.18584	0.00144336	0.0149845
MUC5B	ENSG00000117983.13	protein_coding	17235.5	0.346977	0.108929	3.18536	0.00144576	0.0149986
MYO19	ENSG00000141140.12	protein_coding	4339.57	-0.281197	0.0883155	-3.18401	0.0014525	0.0150576
RFX7	ENSG00000181827.10	protein_coding	1661.91	-0.304918	0.0959596	-3.17756	0.0014852	0.0153856
MB21D1	ENSG00000164430.11	protein_coding	1513.44	-0.257859	0.0811658	-3.17694	0.00148838	0.0154074
FUT11	ENSG00000196968.6	protein_coding	2986.09	0.261865	0.0824505	3.17603	0.00149306	0.0154447
UBL7	ENSG00000138629.11	protein_coding	2103.07	0.289935	0.0913161	3.17507	0.00149801	0.0154848
LEPR	ENSG00000116678.14	protein_coding	801.806	0.322093	0.101505	3.17317	0.00150783	0.0155752
GDE1	ENSG00000006007.7	protein_coding	4332.9	-0.231204	0.0728743	-3.17264	0.0015106	0.0155926
FRK	ENSG00000111816.6	protein_coding	256.137	-0.438578	0.138278	-3.17171	0.00151545	0.0156314
PATL1	ENSG00000166889.13	protein_coding	6961.91	-0.212681	0.067082	-3.17046	0.00152198	0.0156875
DLAT	ENSG00000150768.11	protein_coding	3567.02	-0.23929	0.075484	-3.17007	0.00152401	0.0156972
ASPHD1	ENSG00000174939.6	protein_coding	487.605	0.344506	0.108688	3.16969	0.001526	0.0157065
RAB3D	ENSG00000105514.3	protein_coding	972.821	0.290102	0.0915778	3.16782	0.00153587	0.0157967
C16orf45	ENSG00000166780.6	protein_coding	2137.53	0.246054	0.0777014	3.16667	0.00154196	0.0158368
CSPG4	ENSG00000173546.7	protein_coding	1691.67	0.295591	0.0933419	3.16676	0.00154148	0.0158368
SERPINE1	ENSG00000106366.7	protein_coding	27621.7	-0.341038	0.107735	-3.16554	0.00154794	0.0158868
FAM117A	ENSG00000121104.3	protein_coding	233.169	-0.40061	0.126589	-3.16466	0.00155264	0.0159237
KLHL12	ENSG00000117153.11	protein_coding	2517.61	-0.234555	0.0741648	-3.16261	0.00156361	0.0160247
RSPRY1	ENSG00000159579.9	protein_coding	1959.01	0.251979	0.0797051	3.16139	0.0015702	0.0160809
SASH1	ENSG00000111961.12	protein_coding	2122.31	-0.263862	0.0835194	-3.15929	0.00158155	0.0161856
PIGF	ENSG00000151665.8	protein_coding	386.001	0.358594	0.113554	3.15792	0.00158901	0.0162504
ACTG2	ENSG00000163017.9	protein_coding	63.6295	0.529579	0.167743	3.15709	0.00159352	0.0162849
THBS2	ENSG00000186340.10	protein_coding	1568.56	0.279963	0.0886877	3.15672	0.00159552	0.0162938
LARS2	ENSG00000011376.5	protein_coding	1855.06	-0.261034	0.082706	-3.15617	0.00159858	0.0163134
NCL	ENSG00000115053.11	protein_coding	30032.6	-0.204238	0.0647389	-3.1548	0.00160609	0.0163663
LAMTOR2	ENSG00000116586.7	protein_coding	2039.56	0.301728	0.0956469	3.1546	0.00160718	0.0163663
CPM	ENSG00000135678.7	protein_coding	70.6381	-0.516773	0.1638	-3.15491	0.00160548	0.0163663
MOCS1	ENSG00000124615.13	protein_coding	2479.19	-0.248984	0.0789335	-3.15435	0.00160856	0.0163688
RP11-284F21.10	ENSG00000272405.1	antisense	160.058	-0.439081	0.139293	-3.1522	0.00162044	0.0164781
CLIC5	ENSG00000112782.11	protein_coding	46.1632	0.533845	0.169453	3.15039	0.0016305	0.0165687
CPQ	ENSG00000104324.11	protein_coding	1016.91	0.280053	0.0889138	3.14971	0.0016343	0.0165956
DISC1	ENSG00000162946.16	protein_coding	337.755	0.422667	0.13424	3.14858	0.00164066	0.0166484
MOCOS	ENSG00000075643.5	protein_coding	1519.96	-0.252692	0.0803076	-3.14656	0.00165205	0.0167522
EXOSC8	ENSG00000120699.8	protein_coding	1084.14	-0.291032	0.0925451	-3.14476	0.00166224	0.0168437
ZNF267	ENSG00000185947.10	protein_coding	635.753	-0.331626	0.105482	-3.1439	0.00166714	0.0168814
ZSCAN18	ENSG00000121413.8	protein_coding	3277.31	0.21855	0.0695415	3.14273	0.00167381	0.0169133
ATP6AP2	ENSG00000182220.9	protein_coding	4573.29	-0.222692	0.0708575	-3.14281	0.00167334	0.0169133
DNER	ENSG00000187957.7	protein_coding	1103.92	-0.274795	0.0874294	-3.14305	0.00167197	0.0169133
PRRG4	ENSG00000135378.3	protein_coding	88.3308	-0.509972	0.162304	-3.14208	0.0016775	0.0169386
PSMD11	ENSG00000108671.5	protein_coding	6066.96	-0.217957	0.0693973	-3.14072	0.00168534	0.0170059
DCAF4	ENSG00000119599.12	protein_coding	2113.67	0.245144	0.0780942	3.13908	0.0016948	0.0170893
FN3K	ENSG00000167363.9	protein_coding	267.272	0.386086	0.12318	3.13432	0.00172251	0.0173566
KCTD10	ENSG00000110906.8	protein_coding	8449.83	-0.204043	0.0651436	-3.13219	0.00173505	0.0174707
PPM1M	ENSG00000164088.13	protein_coding	650.518	0.320626	0.102434	3.13008	0.00174756	0.0175843
NUP98	ENSG00000110713.11	protein_coding	8682.03	-0.221653	0.0708233	-3.12966	0.0017501	0.0175865
HSD17B7	ENSG00000132196.9	protein_coding	1309.73	-0.268211	0.0857002	-3.12964	0.00175022	0.0175865
PLEKHH2	ENSG00000152527.9	protein_coding	660.782	0.359456	0.114872	3.1292	0.00175286	0.0176007
DNMBP	ENSG00000107554.11	protein_coding	16377.5	-0.249634	0.0798178	-3.12755	0.00176269	0.0176871
FAM49B	ENSG00000153310.14	protein_coding	4173.74	-0.226221	0.072348	-3.12685	0.00176691	0.0177171
STARD3NL	ENSG00000010270.9	protein_coding	2150.4	-0.257347	0.0823279	-3.12588	0.00177273	0.0177409
AGPS	ENSG00000018510.8	protein_coding	2527.95	-0.235193	0.0752355	-3.12609	0.00177145	0.0177409
HELZ2	ENSG00000130589.12	protein_coding	6690.88	0.215332	0.0688877	3.12584	0.00177298	0.0177409
EFCAB11	ENSG00000140025.11	protein_coding	501.085	-0.332542	0.106441	-3.12418	0.00178304	0.0178291
SLC26A11	ENSG00000181045.10	protein_coding	889.054	0.275805	0.0882888	3.12389	0.00178475	0.0178339
CCDC146	ENSG00000135205.10	protein_coding	748.727	0.353903	0.113313	3.12324	0.00178872	0.0178611
MT-ATP8	ENSG00000228253.1	protein_coding	38700.1	-0.250492	0.0802225	-3.12247	0.00179342	0.0178956
NUDT16L1	ENSG00000168101.10	protein_coding	1057.41	0.332029	0.106343	3.12225	0.00179474	0.0178964
PTGFR	ENSG00000122420.5	protein_coding	192.294	0.474676	0.152062	3.1216	0.00179869	0.0179109
SOX4	ENSG00000124766.4	protein_coding	17746.1	0.223407	0.0715676	3.12162	0.00179858	0.0179109
VAV2	ENSG00000160293.12	protein_coding	2270.78	0.233346	0.074758	3.12135	0.00180024	0.017914
TJP3	ENSG00000105289.10	protein_coding	130.206	0.461932	0.148068	3.11973	0.00181018	0.0179873
ECE1	ENSG00000117298.10	protein_coding	37339	0.208676	0.0668955	3.11943	0.001812	0.0179873
ITIH2	ENSG00000151655.13	protein_coding	602.088	0.316601	0.101495	3.11938	0.0018123	0.0179873
GPR115	ENSG00000153294.7	protein_coding	158.014	-0.451322	0.144685	-3.11933	0.00181261	0.0179873
CEP76	ENSG00000101624.6	protein_coding	465.049	-0.350287	0.112346	-3.11793	0.00182125	0.0180607
CYHR1	ENSG00000187954.8	protein_coding	5382.09	0.213286	0.0684121	3.11767	0.00182287	0.0180642
CTSB	ENSG00000164733.16	protein_coding	33427.3	0.258797	0.0830175	3.11738	0.00182465	0.0180694
RP11-661A12.14	ENSG00000271912.1	lincRNA	305.371	0.386385	0.123956	3.11712	0.00182628	0.0180732
SCFD2	ENSG00000184178.11	protein_coding	543.329	-0.310074	0.0995779	-3.11389	0.0018464	0.0182597
PASK	ENSG00000115687.9	protein_coding	363.788	-0.417294	0.134075	-3.11239	0.0018558	0.0183401
SPTAN1	ENSG00000197694.9	protein_coding	22637.4	-0.230482	0.0740732	-3.11154	0.00186112	0.01838
SCLT1	ENSG00000151466.7	protein_coding	654.081	-0.312444	0.100423	-3.11129	0.00186272	0.0183832
CAV1	ENSG00000105974.7	protein_coding	9818.01	-0.21934	0.0705418	-3.10937	0.00187489	0.0184906
DDX12P	ENSG00000214826.4	pseudogene	319.27	-0.457552	0.147345	-3.10532	0.00190075	0.0187328
PSIP1	ENSG00000164985.10	protein_coding	1733.27	-0.239554	0.0771552	-3.10483	0.00190389	0.018751
PKP2	ENSG00000057294.9	protein_coding	1926.19	-0.233416	0.0752202	-3.1031	0.00191505	0.0188415
LARP6	ENSG00000166173.9	protein_coding	2416.89	0.273243	0.0880605	3.1029	0.00191631	0.0188415
POLH	ENSG00000170734.7	protein_coding	1390.44	-0.272347	0.0877803	-3.10259	0.00191833	0.0188415
H1FX	ENSG00000184897.4	protein_coding	1512.1	-0.299969	0.0966791	-3.10273	0.00191745	0.0188415
CHCHD3	ENSG00000106554.7	protein_coding	2520.52	-0.283217	0.0912914	-3.10235	0.00191993	0.0188444
SYNE1	ENSG00000131018.18	protein_coding	1642.29	-0.262536	0.0846617	-3.101	0.00192867	0.0189043
LANCL2	ENSG00000132434.5	protein_coding	1500.14	0.254863	0.0821852	3.10108	0.00192814	0.0189043
LIN9	ENSG00000183814.11	protein_coding	403.743	-0.350004	0.112878	-3.10073	0.00193043	0.0189088
NEURL1B	ENSG00000214357.4	protein_coding	377.185	-0.386084	0.124594	-3.09874	0.00194342	0.0190231
ZNF37BP	ENSG00000234420.3	pseudogene	975.34	0.348648	0.112526	3.09836	0.00194593	0.0190346
ADAMTSL3	ENSG00000156218.8	protein_coding	85.5869	-0.500176	0.161483	-3.09738	0.00195238	0.0190848
FAM84A	ENSG00000162981.12	protein_coding	248	0.378305	0.122199	3.09582	0.00196268	0.0191724
NOM1	ENSG00000146909.3	protein_coding	1962.98	-0.251629	0.0812941	-3.0953	0.00196615	0.0191933
NEU1	ENSG00000204386.6	protein_coding	2994.31	-0.271153	0.0876263	-3.09443	0.00197194	0.0192368
PRSS30P	ENSG00000172460.10	pseudogene	36.5648	-0.5211	0.168463	-3.09327	0.00197966	0.019299
ZNF192P1	ENSG00000226314.3	pseudogene	138.45	0.481284	0.15566	3.09189	0.00198885	0.0193755
SRSF8	ENSG00000180771.10	pseudogene	811.847	-0.288366	0.0932768	-3.0915	0.00199146	0.0193877
SH3GLB1	ENSG00000097033.10	protein_coding	8805.11	0.249027	0.0805766	3.09056	0.0019978	0.0194155
CBX7	ENSG00000100307.8	protein_coding	1307.7	0.258529	0.0836535	3.09048	0.00199836	0.0194155
LSS	ENSG00000160285.10	protein_coding	9908.87	-0.224176	0.0725325	-3.0907	0.00199685	0.0194155
RP11-1017G21.4	ENSG00000258959.1	antisense	43.7432	-0.5247	0.169938	-3.08759	0.00201785	0.0195917
XPO1	ENSG00000082898.12	protein_coding	8803.07	-0.208685	0.0675983	-3.08713	0.00202097	0.0196059
SMAD3	ENSG00000166949.11	protein_coding	13606.8	-0.22956	0.0743642	-3.08698	0.00202205	0.0196059
AGR2	ENSG00000106541.7	protein_coding	6149.01	-0.288922	0.0936028	-3.08668	0.00202404	0.0196121
SLC25A35	ENSG00000125434.6	protein_coding	158.856	-0.439282	0.142338	-3.0862	0.00202735	0.0196309
FHOD1	ENSG00000135723.9	protein_coding	3019.64	0.233399	0.0756658	3.0846	0.00203824	0.0197231
CD97	ENSG00000123146.15	protein_coding	21821.3	-0.20759	0.0673145	-3.08389	0.00204314	0.0197572
GGT7	ENSG00000131067.12	protein_coding	1157.52	0.259366	0.084114	3.0835	0.00204581	0.0197697
NALCN	ENSG00000102452.11	protein_coding	140.242	-0.471228	0.152853	-3.08288	0.00205008	0.0197978
GARS	ENSG00000106105.9	protein_coding	7578.77	-0.236262	0.076707	-3.08006	0.00206961	0.0199729
FAM195A	ENSG00000172366.15	protein_coding	577.568	0.403714	0.131115	3.07908	0.0020764	0.020025
GXYLT1	ENSG00000151233.6	protein_coding	805.817	0.293076	0.0951895	3.07887	0.00207784	0.0200255
PDIA6	ENSG00000143870.8	protein_coding	17189	-0.230637	0.074928	-3.07811	0.00208315	0.0200632
ITFG1	ENSG00000129636.8	protein_coding	4097.83	-0.241506	0.0784719	-3.07761	0.00208666	0.0200713
PHLDB3	ENSG00000176531.6	protein_coding	473.183	0.365178	0.118657	3.0776	0.00208678	0.0200713
CASP2	ENSG00000106144.15	protein_coding	1132.54	-0.263439	0.0856073	-3.0773	0.00208888	0.0200781
INTU	ENSG00000164066.8	protein_coding	1100.3	0.30597	0.0994455	3.07676	0.00209263	0.0200903
RP11-1277A3.1	ENSG00000247679.2	antisense	152.275	0.437579	0.142223	3.07672	0.00209295	0.0200903
CECR6	ENSG00000183307.3	protein_coding	66.4041	0.504253	0.163922	3.07617	0.00209678	0.0201137
OGFRL1	ENSG00000119900.7	protein_coding	4865.9	-0.24052	0.0781971	-3.07582	0.00209925	0.020124
CYB561A3	ENSG00000162144.5	protein_coding	2514.17	-0.258833	0.084167	-3.07523	0.00210342	0.0201506
KANK2	ENSG00000197256.6	protein_coding	12761.3	0.210523	0.0684645	3.07492	0.00210561	0.0201581
CSAD	ENSG00000139631.14	protein_coding	752.254	0.369082	0.120086	3.07347	0.00211587	0.0202278
NSMF	ENSG00000165802.15	protein_coding	5608.99	0.241035	0.0784289	3.07329	0.00211711	0.0202278
C4orf46	ENSG00000205208.4	protein_coding	667.046	-0.329527	0.107222	-3.07332	0.00211693	0.0202278
DNAH10OS	ENSG00000250091.2	protein_coding	110.286	0.475376	0.154777	3.07137	0.00213078	0.0203449
CDH3	ENSG00000062038.9	protein_coding	176.04	0.444721	0.144881	3.06956	0.00214376	0.0204553
SLITRK6	ENSG00000184564.8	protein_coding	511.626	0.310079	0.101057	3.06835	0.00215243	0.0205108
HLA-DMB	ENSG00000242574.4	protein_coding	538.235	0.319077	0.103988	3.0684	0.00215209	0.0205108
EZR	ENSG00000092820.13	protein_coding	15334.5	-0.203945	0.0664867	-3.06745	0.00215894	0.0205592
SEMA5A	ENSG00000112902.7	protein_coding	371.668	0.426748	0.139201	3.06571	0.00217157	0.0206659
PSMB2	ENSG00000126067.7	protein_coding	6738.44	-0.261879	0.085445	-3.06489	0.00217751	0.0207086
NEAT1	ENSG00000245532.4	lincRNA	23112.7	0.308551	0.10069	3.06437	0.00218129	0.0207309
TRAF3IP2	ENSG00000056972.14	protein_coding	1068.14	-0.270847	0.0884053	-3.0637	0.00218617	0.0207636
PHACTR2	ENSG00000112419.10	protein_coding	1170.48	-0.281468	0.0918923	-3.06302	0.00219114	0.020797
LZTS2	ENSG00000107816.13	protein_coding	8419	0.212301	0.0693401	3.06174	0.00220052	0.0208586
IFI27	ENSG00000165949.8	protein_coding	3877.47	0.312694	0.102125	3.06187	0.00219956	0.0208586
TIMP3	ENSG00000100234.11	protein_coding	42727.8	0.222737	0.0728089	3.0592	0.0022193	0.0210227
FAM73A	ENSG00000180488.10	protein_coding	1207.49	-0.268446	0.0878197	-3.05679	0.0022372	0.0211783
ESAM	ENSG00000149564.7	protein_coding	7146.23	-0.288887	0.094516	-3.05649	0.00223943	0.0211855
TES	ENSG00000135269.13	protein_coding	4164.52	-0.218905	0.0716498	-3.05521	0.00224903	0.0212623
MFAP3	ENSG00000037749.7	protein_coding	2474.35	-0.242523	0.0793902	-3.05483	0.00225191	0.0212716
LL22NC03-86G7.1	ENSG00000224086.3	antisense	106.818	-0.472223	0.15459	-3.05469	0.00225297	0.0212716
GLCE	ENSG00000138604.5	protein_coding	2257.74	0.253506	0.0829969	3.0544	0.00225508	0.0212776
CYBRD1	ENSG00000071967.7	protein_coding	5438.05	0.228151	0.0747184	3.05348	0.00226202	0.0213291
MARS	ENSG00000166986.8	protein_coding	6125.13	-0.281969	0.0923597	-3.05294	0.00226609	0.0213535
BUD13	ENSG00000137656.7	protein_coding	1656.51	-0.264552	0.0866731	-3.05229	0.002271	0.0213733
PHLDA3	ENSG00000174307.5	protein_coding	476.016	0.329534	0.107964	3.05227	0.00227117	0.0213733
ARHGEF28	ENSG00000214944.5	protein_coding	4789.25	-0.221517	0.0725834	-3.05189	0.00227404	0.0213863
EIF4E2	ENSG00000135930.9	protein_coding	3656.12	0.219899	0.0720864	3.05049	0.00228469	0.0214725
DNAH10	ENSG00000197653.10	protein_coding	44.7046	0.518209	0.169938	3.0494	0.00229301	0.0215226
COL15A1	ENSG00000204291.6	protein_coding	58.8197	-0.515486	0.169036	-3.04957	0.00229168	0.0215226
TPT1-AS1	ENSG00000170919.11	antisense	888.109	0.292695	0.0959929	3.04914	0.002295	0.0215272
GLUL	ENSG00000135821.12	protein_coding	16464	0.211187	0.069335	3.04589	0.00231989	0.0217465
RAP1GAP2	ENSG00000132359.9	protein_coding	1807.49	0.252685	0.0829958	3.04456	0.00233022	0.0218291
KRCC1	ENSG00000172086.7	protein_coding	952.457	0.300842	0.0988515	3.04337	0.00233945	0.0219013
YPEL2	ENSG00000175155.4	protein_coding	818.407	0.27067	0.0889714	3.04221	0.00234846	0.0219714
GALNT2	ENSG00000143641.8	protein_coding	10171.4	-0.201067	0.0661244	-3.04074	0.00236001	0.0220508
SLC45A1	ENSG00000162426.10	protein_coding	252.65	0.379793	0.124895	3.04089	0.00235878	0.0220508
VMAC	ENSG00000187650.3	protein_coding	221.385	0.403831	0.132901	3.03859	0.00237689	0.0221941
TSPAN9	ENSG00000011105.7	protein_coding	3420.78	0.226256	0.0744792	3.03785	0.00238275	0.0222343
PYROXD2	ENSG00000119943.6	protein_coding	2361.38	0.226221	0.0745164	3.03586	0.00239851	0.0223545
PPARA	ENSG00000186951.12	protein_coding	1691.66	0.287861	0.0948211	3.03583	0.00239873	0.0223545
EIF2S2	ENSG00000125977.6	protein_coding	12161.9	-0.226159	0.0745045	-3.03551	0.00240129	0.0223638
PLOD1	ENSG00000083444.12	protein_coding	34526.2	0.23635	0.0779561	3.03184	0.00243071	0.0225794
SOX12	ENSG00000177732.6	protein_coding	2674.75	0.234544	0.0773486	3.0323	0.00242701	0.0225794
ADSSL1	ENSG00000185100.6	protein_coding	67.6374	0.504259	0.166311	3.03203	0.00242918	0.0225794
PRMT3	ENSG00000185238.8	protein_coding	798.971	-0.294543	0.0971457	-3.03197	0.00242964	0.0225794
VASH1	ENSG00000071246.6	protein_coding	532.289	0.310707	0.102517	3.03077	0.00243931	0.0226447
DHTKD1	ENSG00000181192.7	protein_coding	1658.99	0.256218	0.0845504	3.03036	0.00244263	0.0226608
CCNG1	ENSG00000113328.14	protein_coding	2863.93	-0.239125	0.0789367	-3.02933	0.00245099	0.0227238
PKD1	ENSG00000008710.13	protein_coding	5527.81	0.221555	0.0731441	3.02903	0.00245342	0.0227316
GPR37	ENSG00000170775.2	protein_coding	314.105	0.371742	0.122755	3.02833	0.00245909	0.0227695
POLI	ENSG00000101751.6	protein_coding	1125.96	0.296572	0.0979701	3.02717	0.00246859	0.0228165
PAK1IP1	ENSG00000111845.4	protein_coding	1440.46	-0.280223	0.092578	-3.02688	0.00247089	0.0228165
PRKAR2A	ENSG00000114302.11	protein_coding	4395.48	-0.222023	0.0733538	-3.02674	0.0024721	0.0228165
ACTL6A	ENSG00000136518.12	protein_coding	4430.5	-0.258625	0.0854384	-3.02703	0.00246969	0.0228165
RP11-160O5.1	ENSG00000263470.1	lincRNA	145.194	0.455634	0.150518	3.0271	0.00246911	0.0228165
SEPP1	ENSG00000250722.1	protein_coding	48.2311	0.511453	0.169033	3.02576	0.00248007	0.0228755
MFAP2	ENSG00000117122.9	protein_coding	3026.7	0.285361	0.0943294	3.02515	0.00248507	0.0228913
SATB2	ENSG00000119042.12	protein_coding	1107.91	0.322347	0.106556	3.02516	0.00248505	0.0228913
DUSP8	ENSG00000184545.6	protein_coding	122.82	0.451208	0.149161	3.02497	0.00248656	0.0228913
PITPNM2	ENSG00000090975.8	protein_coding	2083.29	0.249678	0.0825605	3.02418	0.00249307	0.0229365
LEF1	ENSG00000138795.5	protein_coding	603.45	0.300465	0.0993855	3.02322	0.00250098	0.0229946
HNRNPA3	ENSG00000170144.14	protein_coding	14901.1	-0.211916	0.0701035	-3.0229	0.00250365	0.0230045
UTP14A	ENSG00000156697.8	protein_coding	2253.74	-0.254731	0.0842736	-3.02266	0.0025056	0.0230077
DSC2	ENSG00000134755.10	protein_coding	1410.91	0.270847	0.0896143	3.02237	0.00250807	0.0230157
SLC40A1	ENSG00000138449.6	protein_coding	163.391	0.428788	0.141964	3.0204	0.0025244	0.0231508
RHEB	ENSG00000106615.5	protein_coding	5851.51	-0.261137	0.0864902	-3.01927	0.00253388	0.0232229
LAS1L	ENSG00000001497.12	protein_coding	2895.21	-0.251833	0.0834263	-3.01863	0.00253923	0.0232571
TLR8-AS1	ENSG00000233338.1	antisense	43.9755	-0.512624	0.169842	-3.01824	0.00254251	0.0232723
SPC25	ENSG00000152253.4	protein_coding	442.928	-0.333613	0.110553	-3.01767	0.00254722	0.0232859
RP11-554I8.2	ENSG00000223784.1	lincRNA	186.53	-0.470304	0.155847	-3.01774	0.00254668	0.0232859
FAM92A1	ENSG00000188343.8	protein_coding	662.715	0.282354	0.0936542	3.01486	0.00257102	0.0234885
WLS	ENSG00000116729.9	protein_coding	9341.02	0.207911	0.0689724	3.01441	0.00257479	0.023508
MBOAT1	ENSG00000172197.9	protein_coding	268.268	-0.374389	0.124221	-3.0139	0.00257911	0.0235176
ZNF425	ENSG00000204947.4	protein_coding	318.171	0.360612	0.119646	3.01399	0.0025784	0.0235176
ABI3BP	ENSG00000154175.12	protein_coding	127.208	-0.443332	0.147106	-3.01369	0.00258087	0.0235188
CHTF18	ENSG00000127586.12	protein_coding	1228.5	-0.357898	0.118769	-3.0134	0.00258337	0.0235266
CD163L1	ENSG00000177675.4	protein_coding	785.158	-0.327385	0.108676	-3.01249	0.00259116	0.0235827
UBE2Q2P1	ENSG00000189136.4	pseudogene	179.978	0.426422	0.141575	3.012	0.00259537	0.023606
DHRS13	ENSG00000167536.9	protein_coding	324.71	0.358789	0.119131	3.01171	0.0025978	0.0236132
PDHX	ENSG00000110435.7	protein_coding	1802.15	-0.235007	0.0780907	-3.00941	0.00261751	0.0237774
TPM3	ENSG00000143549.15	protein_coding	26405.7	-0.259355	0.0861902	-3.0091	0.00262023	0.0237871
CH25H	ENSG00000138135.5	protein_coding	195.583	0.408683	0.135934	3.00647	0.00264299	0.0239785
GLRX5	ENSG00000182512.4	protein_coding	1904.19	-0.255092	0.0848765	-3.00545	0.00265186	0.0240439
KIF13B	ENSG00000197892.8	protein_coding	2652.38	0.250541	0.0833675	3.00525	0.00265358	0.0240444
IGFBPL1	ENSG00000137142.4	protein_coding	235.009	-0.380202	0.12653	-3.00484	0.00265721	0.0240621
LINC00883	ENSG00000243701.1	lincRNA	317.846	-0.377905	0.125809	-3.00379	0.00266636	0.0241298
CLIP1	ENSG00000130779.15	protein_coding	7049.75	-0.198837	0.0662241	-3.00249	0.00267783	0.0242183
ODF2	ENSG00000136811.12	protein_coding	4154.82	-0.236263	0.0786989	-3.00212	0.0026811	0.0242326
CCNJL	ENSG00000135083.10	protein_coding	4140.58	-0.23695	0.0789759	-3.00028	0.00269732	0.024364
QKI	ENSG00000112531.12	protein_coding	4146.13	0.275642	0.0918991	2.9994	0.00270512	0.0244191
C6orf132	ENSG00000188112.4	protein_coding	1550.83	0.246116	0.0820931	2.99801	0.00271746	0.0245151
CNTNAP3	ENSG00000106714.13	protein_coding	2745.05	0.243334	0.0811723	2.99775	0.00271982	0.024521
ABCC4	ENSG00000125257.9	protein_coding	1869.35	0.264282	0.0881752	2.99723	0.00272441	0.0245326
GINS4	ENSG00000147536.7	protein_coding	1046.32	-0.258727	0.0863231	-2.9972	0.00272475	0.0245326
RP11-253E3.3	ENSG00000250899.3	processed_transcript	471.414	-0.309699	0.103335	-2.99703	0.00272622	0.0245326
HSPA9	ENSG00000113013.8	protein_coding	17664.7	-0.213549	0.0712625	-2.99665	0.00272966	0.0245482
APBB1	ENSG00000166313.14	protein_coding	2297.11	0.244191	0.0815049	2.99602	0.00273526	0.0245832
IRAK1	ENSG00000184216.7	protein_coding	9703.15	-0.224208	0.0748405	-2.99581	0.00273717	0.024585
SLC16A12	ENSG00000152779.12	protein_coding	41.965	-0.508598	0.169894	-2.99361	0.00275697	0.0247474
ASCC3	ENSG00000112249.9	protein_coding	3619.28	-0.216149	0.0722142	-2.99316	0.00276103	0.0247684
MITF	ENSG00000187098.10	protein_coding	705.698	-0.305161	0.101987	-2.99216	0.00277011	0.0248343
AVL9	ENSG00000105778.13	protein_coding	2973.38	-0.226824	0.0758575	-2.99013	0.00278859	0.0249689
TOX	ENSG00000198846.5	protein_coding	327.703	-0.33883	0.113316	-2.99013	0.00278859	0.0249689
PCDHB12	ENSG00000120328.4	protein_coding	213.999	0.392227	0.131211	2.98928	0.00279637	0.025023
OAS3	ENSG00000111331.8	protein_coding	1722.02	-0.282588	0.0945518	-2.98871	0.00280157	0.025054
ADCK5	ENSG00000173137.7	protein_coding	912.349	0.292337	0.0978356	2.98804	0.0028077	0.0250931
IPO9	ENSG00000198700.5	protein_coding	7452.88	-0.216328	0.0724206	-2.98711	0.00281632	0.0251546
ZNF514	ENSG00000144026.7	protein_coding	1249.14	0.320992	0.107482	2.98647	0.00282216	0.0251755
RP11-213G2.3	ENSG00000165121.10	pseudogene	163.47	0.419528	0.140472	2.98656	0.00282136	0.0251755
MAPKAPK5	ENSG00000089022.9	protein_coding	2431.59	-0.250006	0.0837644	-2.98463	0.0028392	0.0252961
PSMD1	ENSG00000173692.8	protein_coding	6305.22	-0.225064	0.0754046	-2.98475	0.0028381	0.0252961
RBFOX2	ENSG00000100320.18	protein_coding	10369.6	-0.208632	0.0699439	-2.98285	0.00285583	0.0254285
ZSWIM5	ENSG00000162415.6	protein_coding	676.444	0.32982	0.110601	2.98206	0.0028632	0.0254626
MAPRE2	ENSG00000166974.8	protein_coding	1739.72	-0.238496	0.079976	-2.9821	0.0028628	0.0254626
PARP11	ENSG00000111224.9	protein_coding	419.143	0.323017	0.108371	2.98065	0.0028764	0.0255603
ZNF48	ENSG00000180035.6	protein_coding	472.447	0.319852	0.107315	2.98051	0.00287773	0.0255603
MTMR12	ENSG00000150712.6	protein_coding	2448.72	-0.220327	0.0739349	-2.98001	0.00288244	0.0255863
H2AFY	ENSG00000113648.12	protein_coding	10816.2	-0.215865	0.0724488	-2.97955	0.00288669	0.0255925
CNIH3	ENSG00000143786.3	protein_coding	1876.38	0.229112	0.0768909	2.9797	0.0028853	0.0255925
HOMER1	ENSG00000152413.10	protein_coding	552.439	0.34466	0.115691	2.97913	0.00289064	0.0256117
PGD	ENSG00000142657.16	protein_coding	13211.6	-0.237633	0.0798637	-2.97548	0.00292532	0.0259031
DVL2	ENSG00000004975.7	protein_coding	4433.35	0.220271	0.074059	2.97426	0.00293692	0.0259898
AC005077.12	ENSG00000227038.2	pseudogene	176.461	-0.424585	0.14278	-2.97371	0.00294227	0.0260211
YPEL1	ENSG00000100027.10	protein_coding	149.29	0.441174	0.14844	2.97207	0.002958	0.0261281
HES1	ENSG00000114315.3	protein_coding	1202.87	-0.273172	0.09191	-2.97217	0.00295707	0.0261281
MSLN	ENSG00000102854.10	protein_coding	3827.66	0.291665	0.0981517	2.97157	0.00296278	0.0261543
TUBB4B	ENSG00000188229.5	protein_coding	21656	-0.254863	0.0858028	-2.97034	0.00297475	0.0262438
PLCD4	ENSG00000115556.9	protein_coding	450.697	0.370904	0.124936	2.96874	0.00299023	0.0263319
EPHB2	ENSG00000133216.12	protein_coding	2597.85	0.231937	0.0781227	2.96888	0.00298891	0.0263319
GAS6	ENSG00000183087.10	protein_coding	9872.51	0.214476	0.0722366	2.96908	0.00298692	0.0263319
TNRC6C	ENSG00000078687.12	protein_coding	693.851	0.342937	0.115601	2.96656	0.00301147	0.0264866
CAPN5	ENSG00000149260.10	protein_coding	1306.95	0.271644	0.0915665	2.96663	0.00301081	0.0264866
CTSS	ENSG00000163131.6	protein_coding	2214.05	-0.245097	0.0826316	-2.96614	0.00301565	0.0265072
C15orf62	ENSG00000188277.8	protein_coding	189.5	0.395449	0.133353	2.96543	0.00302265	0.0265524
SMC3	ENSG00000108055.9	protein_coding	7312.62	-0.19754	0.0666342	-2.96455	0.00303124	0.0266117
S100P	ENSG00000163993.6	protein_coding	581.25	0.344403	0.1162	2.96387	0.00303795	0.0266543
RPA3	ENSG00000106399.7	protein_coding	692.404	-0.311196	0.105015	-2.96335	0.00304307	0.0266829
ZHX3	ENSG00000174306.17	protein_coding	3169.37	0.251805	0.0849862	2.96289	0.00304761	0.0267065
ACBD3	ENSG00000182827.8	protein_coding	2923.46	0.244069	0.0823936	2.96223	0.00305417	0.0267477
BICD1	ENSG00000151746.9	protein_coding	1281.39	0.266565	0.0900463	2.96031	0.00307329	0.0268988
RC3H2	ENSG00000056586.11	protein_coding	5695.03	0.218689	0.073882	2.95997	0.00307667	0.026912
TRUB1	ENSG00000165832.4	protein_coding	790.49	-0.288836	0.0976684	-2.95731	0.00310338	0.0271291
AC004381.6	ENSG00000005189.15	protein_coding	106.236	-0.461842	0.1563	-2.95484	0.00312833	0.0273307
CD74	ENSG00000019582.10	protein_coding	72436.1	0.199134	0.0674083	2.95415	0.00313533	0.0273751
INO80B	ENSG00000115274.10	protein_coding	1613.74	0.261204	0.0884652	2.95262	0.0031509	0.0274944
TMEM150A	ENSG00000168890.9	protein_coding	1090.88	0.298134	0.101112	2.94855	0.00319273	0.0278425
EEF1A2	ENSG00000101210.6	protein_coding	1034.29	0.293655	0.0996277	2.94752	0.0032033	0.0279178
AKT1S1	ENSG00000204673.6	protein_coding	5267.32	0.217294	0.0737354	2.94694	0.00320934	0.0279535
KLHL5	ENSG00000109790.12	protein_coding	7065.43	-0.204277	0.0693331	-2.94631	0.00321593	0.027977
RGS16	ENSG00000143333.6	protein_coding	272.919	0.366985	0.124555	2.94636	0.00321536	0.027977
SLC7A6	ENSG00000103064.9	protein_coding	1408.94	-0.254381	0.0863451	-2.94609	0.00321816	0.0279795
SLC2A8	ENSG00000136856.13	protein_coding	466.168	0.330163	0.112141	2.94417	0.00323822	0.0281369
MICB	ENSG00000204516.5	protein_coding	800.154	-0.273601	0.0929667	-2.943	0.00325049	0.0282265
CORO2A	ENSG00000106789.8	protein_coding	1160.13	0.267915	0.0910571	2.94228	0.0032581	0.0282755
ST7	ENSG00000004866.14	protein_coding	803.333	-0.27151	0.092313	-2.94119	0.00326955	0.0283407
NME3	ENSG00000103024.3	protein_coding	1249.48	0.33222	0.112951	2.94127	0.00326869	0.0283407
AIMP2	ENSG00000106305.5	protein_coding	738.732	-0.296	0.100676	-2.94012	0.00328083	0.0284214
ZNF644	ENSG00000122482.16	protein_coding	3380.38	0.219749	0.0747624	2.93929	0.00328965	0.0284806
LAMTOR1	ENSG00000149357.5	protein_coding	4806.4	0.248191	0.0844671	2.93832	0.00329998	0.0285528
AEN	ENSG00000181026.13	protein_coding	893.735	-0.280777	0.0956054	-2.93683	0.00331582	0.0286727
LINC00669	ENSG00000267374.1	lincRNA	96.2481	-0.467869	0.159351	-2.93609	0.00332376	0.0287241
ADM5	ENSG00000224420.3	protein_coding	104.351	-0.482185	0.16429	-2.93496	0.00333595	0.0288121
MDK	ENSG00000110492.11	protein_coding	2360.69	0.26171	0.0891786	2.93467	0.00333902	0.0288213
DUSP3	ENSG00000108861.4	protein_coding	6008.88	0.201497	0.0686675	2.93439	0.00334203	0.02883
RBPJ	ENSG00000168214.16	protein_coding	10821	0.25617	0.0873555	2.9325	0.00336249	0.0289718
PA2G4	ENSG00000170515.9	protein_coding	3973.44	-0.249387	0.0850408	-2.93255	0.00336188	0.0289718
VCP	ENSG00000165280.11	protein_coding	34332	-0.193901	0.0661503	-2.93122	0.00337628	0.0290732
NSDHL	ENSG00000147383.6	protein_coding	2566.96	-0.246037	0.083958	-2.93048	0.00338435	0.0291253
CPT1C	ENSG00000169169.10	protein_coding	1179.53	0.262123	0.0894559	2.9302	0.00338746	0.0291346
LINC00704	ENSG00000231298.2	lincRNA	2969.49	-0.241416	0.0824128	-2.92936	0.00339665	0.0291962
INO80C	ENSG00000153391.11	protein_coding	1129.42	-0.296424	0.101197	-2.92917	0.00339874	0.0291967
HPS5	ENSG00000110756.13	protein_coding	1645.85	-0.240981	0.0822757	-2.92894	0.00340118	0.0292002
GPR162	ENSG00000250510.3	protein_coding	135.738	0.42099	0.143759	2.92843	0.00340673	0.0292305
STAG3	ENSG00000066923.13	protein_coding	129.754	0.455339	0.155599	2.92636	0.0034295	0.0294082
RP5-1042I8.7	ENSG00000261662.1	sense_overlapping	50.1465	-0.495363	0.169287	-2.92617	0.00343159	0.0294087
CDKN1C	ENSG00000129757.8	protein_coding	887.605	0.314269	0.107441	2.92504	0.00344415	0.0294987
CEP68	ENSG00000011523.9	protein_coding	935.86	0.272356	0.093143	2.92406	0.00345495	0.029556
POLD4	ENSG00000175482.4	protein_coding	1591.91	0.31472	0.107628	2.92415	0.00345395	0.029556
MYLIP	ENSG00000007944.10	protein_coding	1860.17	0.226123	0.0773459	2.92353	0.00346088	0.029588
DCAF11	ENSG00000100897.13	protein_coding	3748.35	0.207376	0.0709376	2.92336	0.00346279	0.029588
SGCE	ENSG00000127990.11	protein_coding	2359.26	0.241867	0.0827954	2.92126	0.00348623	0.0297706
GALNT1	ENSG00000141429.9	protein_coding	7056.05	-0.215444	0.0737744	-2.9203	0.00349695	0.0298444
DDIT4L	ENSG00000145358.2	protein_coding	834.697	0.356646	0.122158	2.91956	0.00350528	0.0298623
PID1	ENSG00000153823.14	protein_coding	754.473	-0.284514	0.0974504	-2.91957	0.00350509	0.0298623
PTPN9	ENSG00000169410.5	protein_coding	1598.13	0.245812	0.0841879	2.91981	0.00350248	0.0298623
CDC23	ENSG00000094880.6	protein_coding	2516.78	-0.244939	0.0839271	-2.91847	0.00351755	0.0299491
OSR1	ENSG00000143867.5	protein_coding	809.338	0.267096	0.0915341	2.91799	0.00352292	0.0299771
ARHGAP18	ENSG00000146376.6	protein_coding	2681.99	-0.211295	0.0724166	-2.91776	0.00352551	0.0299814
ARMCX3	ENSG00000102401.15	protein_coding	3676	0.255101	0.08745	2.91711	0.00353294	0.0300269
PCSK4	ENSG00000115257.11	protein_coding	524.173	0.333699	0.114443	2.91586	0.00354712	0.0301296
PVR	ENSG00000073008.10	protein_coding	4493.09	-0.201355	0.0690689	-2.91528	0.00355372	0.03015
CNIH4	ENSG00000143771.7	protein_coding	4014.53	0.233884	0.0802259	2.91532	0.00355325	0.03015
SRSF1	ENSG00000136450.8	protein_coding	9289.85	-0.197528	0.0678277	-2.91221	0.00358881	0.0304298
APOC1	ENSG00000130208.5	protein_coding	625.997	0.323201	0.111013	2.91137	0.00359844	0.0304755
SAT2	ENSG00000141504.7	protein_coding	2183.64	0.242393	0.0832542	2.91148	0.00359723	0.0304755
TP63	ENSG00000073282.8	protein_coding	390.701	0.349156	0.119959	2.91062	0.00360712	0.0305311
OVCH2	ENSG00000183378.7	polymorphic_pseudogene	346.977	0.373114	0.128201	2.91038	0.00360984	0.0305362
CLU	ENSG00000120885.15	protein_coding	4354.77	0.23082	0.0793441	2.9091	0.00362475	0.0306263
THEM6	ENSG00000130193.7	protein_coding	1587.41	-0.307265	0.105616	-2.90928	0.00362264	0.0306263
IRF7	ENSG00000185507.15	protein_coding	1668.48	0.279262	0.0960041	2.90885	0.00362756	0.0306321
NRP2	ENSG00000118257.12	protein_coding	657.58	-0.278405	0.0957389	-2.90797	0.00363787	0.0306831
TFF2	ENSG00000160181.4	protein_coding	265.144	-0.399459	0.137363	-2.90806	0.00363678	0.0306831
DFNB31	ENSG00000095397.9	protein_coding	1040.7	0.28473	0.0979594	2.90661	0.00365367	0.0307983
KCTD2	ENSG00000180901.6	protein_coding	3282.99	-0.229021	0.078862	-2.90407	0.00368347	0.0310313
DOPEY1	ENSG00000083097.10	protein_coding	885.519	0.267016	0.0919912	2.90262	0.00370053	0.0311385
CTC-471F3.5	ENSG00000269069.1	pseudogene	112.798	0.485007	0.167083	2.90279	0.00369856	0.0311385
FAM183A	ENSG00000186973.6	protein_coding	56.5495	0.485388	0.167249	2.90219	0.0037056	0.031163
PAQR8	ENSG00000170915.8	protein_coding	649.293	0.295526	0.101842	2.90181	0.00371016	0.0311831
CWC27	ENSG00000153015.11	protein_coding	1874.73	-0.245777	0.0847319	-2.90064	0.00372398	0.031281
IL18	ENSG00000150782.7	protein_coding	530.182	-0.301552	0.103995	-2.89968	0.00373546	0.0313591
IGDCC4	ENSG00000103742.7	protein_coding	1105.79	0.278674	0.0961581	2.89809	0.00375448	0.0315004
S100A2	ENSG00000196754.6	protein_coding	1081.11	0.336322	0.116107	2.89667	0.0037715	0.0316248
CD2AP	ENSG00000198087.7	protein_coding	4312.72	-0.207602	0.0716825	-2.89612	0.00377802	0.0316446
RP11-818F20.5	ENSG00000257732.1	antisense	92.0151	-0.470798	0.162563	-2.8961	0.00377826	0.0316446
RRAD	ENSG00000166592.7	protein_coding	1547.47	0.329319	0.113718	2.89592	0.00378051	0.031645
AC008440.10	ENSG00000232324.1	lincRNA	34.5123	-0.489603	0.169086	-2.8956	0.0037844	0.0316591
ISM1	ENSG00000101230.5	protein_coding	437.346	0.31372	0.108435	2.89317	0.00381374	0.0318861
ARPC1A	ENSG00000241685.4	protein_coding	5563.2	-0.217863	0.0753125	-2.89279	0.00381839	0.0319064
CCNA1	ENSG00000133101.5	protein_coding	226.523	-0.381092	0.13178	-2.89189	0.00382935	0.0319794
CTSH	ENSG00000103811.11	protein_coding	1062.93	0.314109	0.108652	2.89096	0.00384064	0.032055
AIM2	ENSG00000163568.9	protein_coding	893.128	0.257451	0.0890717	2.89038	0.00384774	0.0320958
ARSJ	ENSG00000180801.11	protein_coding	1933.74	-0.226579	0.078459	-2.88786	0.00387872	0.0323354
SLC25A3	ENSG00000075415.8	protein_coding	33186.6	-0.218185	0.0755666	-2.88732	0.00388538	0.0323526
EPM2A	ENSG00000112425.9	protein_coding	227.843	-0.380552	0.131806	-2.88721	0.00388671	0.0323526
FAM171B	ENSG00000144369.8	protein_coding	279.4	0.396714	0.137407	2.88715	0.00388753	0.0323526
CRLS1	ENSG00000088766.7	protein_coding	1942.49	0.23792	0.0824268	2.88645	0.0038962	0.0323714
SMPD4	ENSG00000136699.15	protein_coding	3156.03	-0.227172	0.0787039	-2.88642	0.00389653	0.0323714
CDH4	ENSG00000179242.11	protein_coding	1425.99	-0.239533	0.0829793	-2.88666	0.00389354	0.0323714
STARD13	ENSG00000133121.16	protein_coding	1076.28	-0.253856	0.0879629	-2.88594	0.0039025	0.0324022
RNF217	ENSG00000146373.12	protein_coding	1666.49	0.340957	0.118159	2.88559	0.00390681	0.0324193
SPTBN1	ENSG00000115306.11	protein_coding	40540.5	-0.210054	0.0728012	-2.88531	0.0039103	0.0324296
FAM111A	ENSG00000166801.11	protein_coding	2240.92	-0.241384	0.0837256	-2.88304	0.00393854	0.032645
AMPD2	ENSG00000116337.11	protein_coding	3376.73	0.201187	0.0697901	2.88274	0.00394238	0.032658
GLO1	ENSG00000124767.6	protein_coding	8040.17	0.217916	0.0756002	2.88248	0.00394554	0.0326652
DDB2	ENSG00000134574.7	protein_coding	588.024	-0.333882	0.115842	-2.88222	0.00394878	0.0326652
FANCB	ENSG00000181544.9	protein_coding	94.8597	-0.478571	0.166048	-2.88212	0.00395006	0.0326652
FAM126A	ENSG00000122591.7	protein_coding	1468.48	-0.261	0.0905879	-2.88118	0.00396184	0.0327437
EEA1	ENSG00000102189.12	protein_coding	2045.56	-0.223393	0.0775537	-2.88049	0.00397058	0.0327971
PRKCE	ENSG00000171132.9	protein_coding	953.074	-0.266415	0.0924985	-2.88021	0.00397405	0.032807
LGALS9	ENSG00000168961.12	protein_coding	665.995	0.29926	0.103915	2.87985	0.0039786	0.0328257
MST4	ENSG00000134602.11	protein_coding	794.359	-0.285309	0.0991145	-2.87858	0.0039947	0.032902
STARD9	ENSG00000159433.7	protein_coding	1875.5	0.309129	0.107386	2.87867	0.00399353	0.032902
FAM72A	ENSG00000196550.6	protein_coding	105.557	-0.461978	0.160473	-2.87885	0.00399123	0.032902
FAM107B	ENSG00000065809.9	protein_coding	12370.1	-0.234784	0.0815934	-2.87748	0.00400861	0.0329977
ZEB2	ENSG00000169554.12	protein_coding	1781.96	0.254061	0.0883546	2.87547	0.00403426	0.0331898
IDS	ENSG00000241489.3	protein_coding	44.1476	0.487742	0.169635	2.87525	0.00403711	0.0331943
CAD	ENSG00000084774.9	protein_coding	5113.62	-0.248671	0.0865026	-2.87472	0.00404385	0.0332307
DGKQ	ENSG00000145214.9	protein_coding	1676.7	0.237363	0.0825983	2.8737	0.00405688	0.0333188
OTUD4	ENSG00000164164.11	protein_coding	4799.84	-0.220801	0.0769076	-2.87099	0.00409184	0.0335867
GNB4	ENSG00000114450.5	protein_coding	1438.42	-0.229593	0.0799937	-2.87014	0.00410288	0.0336582
SCYL3	ENSG00000000457.9	protein_coding	923.361	0.259807	0.0905545	2.86906	0.00411687	0.0337537
OXSR1	ENSG00000172939.4	protein_coding	9070.33	-0.194597	0.0678349	-2.86868	0.00412189	0.0337755
BRIX1	ENSG00000113460.8	protein_coding	1363.3	-0.282917	0.0986352	-2.86831	0.00412669	0.0337957
DNAJB2	ENSG00000135924.11	protein_coding	3283.08	0.225897	0.0787879	2.86716	0.0041418	0.0338811
FANCG	ENSG00000221829.5	protein_coding	1665.59	-0.295129	0.102934	-2.86715	0.00414183	0.0338811
EPN2	ENSG00000072134.11	protein_coding	3046.48	0.206866	0.0722001	2.86518	0.00416777	0.0340739
IGFBP5	ENSG00000115461.4	protein_coding	286.096	0.41323	0.144236	2.86496	0.00417064	0.034078
SYTL1	ENSG00000142765.13	protein_coding	335.72	0.347166	0.121218	2.86399	0.00418336	0.0341625
EML6	ENSG00000214595.7	protein_coding	852.179	0.310888	0.108573	2.8634	0.0041912	0.0342071
DDX46	ENSG00000145833.11	protein_coding	6653.88	-0.21197	0.0740712	-2.86171	0.00421361	0.0343706
PPAPDC1A	ENSG00000203805.6	protein_coding	742.534	0.272974	0.0954241	2.86064	0.00422784	0.0344671
NUP85	ENSG00000125450.6	protein_coding	3119.11	-0.275996	0.0965257	-2.8593	0.00424572	0.0345737
DLG4	ENSG00000132535.14	protein_coding	2637.2	0.217464	0.0760531	2.85937	0.00424486	0.0345737
SKA2	ENSG00000182628.8	protein_coding	1907.82	-0.231646	0.0810347	-2.8586	0.00425517	0.034631
TMEM133	ENSG00000170647.2	protein_coding	466.066	-0.311155	0.108855	-2.85842	0.00425759	0.0346311
ANXA7	ENSG00000138279.11	protein_coding	6663.85	-0.21724	0.0760164	-2.85781	0.00426578	0.0346781
NEDD4	ENSG00000069869.11	protein_coding	3367.81	-0.22841	0.079986	-2.85563	0.00429517	0.0348973
RBMX	ENSG00000147274.10	protein_coding	9492.61	-0.197212	0.0690954	-2.8542	0.00431457	0.0350352
RRAGB	ENSG00000083750.8	protein_coding	1014.19	0.243896	0.0855112	2.85221	0.00434158	0.0352346
UAP1L1	ENSG00000197355.6	protein_coding	2004.58	0.213406	0.0748328	2.85177	0.00434767	0.0352642
SH3RF3	ENSG00000172985.8	protein_coding	1360.4	-0.239081	0.0838529	-2.8512	0.0043555	0.0353078
RILPL1	ENSG00000188026.7	protein_coding	1054.77	0.2526	0.0886343	2.84991	0.00437322	0.0354315
TCFL5	ENSG00000101190.8	protein_coding	1915.22	0.22211	0.0779551	2.8492	0.00438287	0.0354897
RIMS3	ENSG00000117016.5	protein_coding	189.094	0.392179	0.137706	2.84796	0.00440011	0.0356092
SNRNP40	ENSG00000060688.8	protein_coding	2489.92	-0.245752	0.086316	-2.84712	0.00441169	0.0356828
PEX12	ENSG00000108733.5	protein_coding	563.734	0.284369	0.099965	2.84469	0.00444552	0.0359319
LINC00152	ENSG00000222041.6	lincRNA	1923.15	-0.309303	0.108735	-2.84455	0.00444747	0.0359319
RFC1	ENSG00000035928.10	protein_coding	4140.74	-0.213384	0.0750371	-2.84371	0.00445914	0.036006
ATP6V0D2	ENSG00000147614.3	protein_coding	137.074	-0.452196	0.159037	-2.84333	0.00446447	0.0360287
GPCPD1	ENSG00000125772.8	protein_coding	2908.26	0.240172	0.0844882	2.84267	0.00447379	0.0360837
RGL3	ENSG00000205517.8	protein_coding	760.89	0.289345	0.101812	2.84194	0.00448392	0.0361452
KLHL24	ENSG00000114796.11	protein_coding	4805.36	0.264044	0.092924	2.84151	0.00449009	0.0361468
MED12	ENSG00000184634.11	protein_coding	4966.41	0.235031	0.0827164	2.8414	0.00449154	0.0361468
C8orf82	ENSG00000213563.2	protein_coding	2324.3	0.248687	0.0875229	2.8414	0.00449166	0.0361468
PARP2	ENSG00000129484.9	protein_coding	1616.12	-0.280451	0.0987171	-2.84096	0.00449785	0.0361744
LINC00511	ENSG00000227036.2	lincRNA	686.832	-0.275546	0.096996	-2.8408	0.00450012	0.0361744
NNT	ENSG00000112992.12	protein_coding	3858.61	-0.206418	0.0726695	-2.84051	0.00450416	0.0361867
CLDN1	ENSG00000163347.5	protein_coding	169.879	-0.408335	0.143767	-2.84025	0.00450785	0.0361961
MICAL1	ENSG00000135596.13	protein_coding	3482.58	0.206993	0.072894	2.83964	0.00451645	0.0362248
GPSM1	ENSG00000160360.7	protein_coding	1819.18	0.218205	0.0768384	2.83979	0.00451436	0.0362248
PAPOLA	ENSG00000090060.13	protein_coding	11809	0.204163	0.0719121	2.83906	0.00452469	0.0362706
RHBDD1	ENSG00000144468.12	protein_coding	1071.14	0.262235	0.0923828	2.83857	0.00453162	0.0363059
PLAG1	ENSG00000181690.3	protein_coding	773.066	0.348529	0.122792	2.83836	0.00453458	0.0363095
CDYL	ENSG00000153046.13	protein_coding	2598.51	-0.206812	0.0728756	-2.83788	0.0045414	0.0363439
ZNF519	ENSG00000175322.7	protein_coding	62.2679	-0.476797	0.168113	-2.83618	0.00456574	0.0365183
MCAM	ENSG00000076706.10	protein_coding	3260.06	-0.213909	0.0754314	-2.83581	0.00457101	0.0365402
TCEB3	ENSG00000011007.8	protein_coding	4527.78	-0.197875	0.0698018	-2.83482	0.00458521	0.036613
TET3	ENSG00000187605.11	protein_coding	2466.29	-0.241233	0.0850927	-2.83494	0.00458344	0.036613
YPEL5	ENSG00000119801.8	protein_coding	7456.53	0.222693	0.078575	2.83414	0.00459491	0.0366701
CALCOCO1	ENSG00000012822.11	protein_coding	5907.7	0.218797	0.077242	2.83261	0.00461693	0.0368149
PLD2	ENSG00000129219.9	protein_coding	1634.48	0.242375	0.0855685	2.83253	0.00461817	0.0368149
RALGDS	ENSG00000160271.10	protein_coding	7945.45	0.19637	0.0693442	2.83182	0.00462839	0.0368759
TMBIM6	ENSG00000139644.8	protein_coding	34695.5	-0.1974	0.0697361	-2.83068	0.00464496	0.0369874
ULBP3	ENSG00000131019.6	protein_coding	123.174	-0.428707	0.151623	-2.82746	0.00469196	0.0373204
TAOK1	ENSG00000160551.5	protein_coding	8499.14	0.214317	0.0757944	2.82761	0.00468976	0.0373204
RANGAP1	ENSG00000100401.15	protein_coding	8836.34	-0.213362	0.075472	-2.82704	0.00469806	0.0373483
FAM134A	ENSG00000144567.6	protein_coding	6211.09	0.203534	0.072002	2.82677	0.00470194	0.0373585
TTC3	ENSG00000182670.9	protein_coding	13887.7	0.230141	0.0814993	2.82384	0.00474521	0.0376815
UTP20	ENSG00000120800.4	protein_coding	2919.97	-0.230254	0.0815465	-2.82359	0.00474895	0.0376904
CCNE2	ENSG00000175305.12	protein_coding	354.439	-0.325197	0.115235	-2.82204	0.00477194	0.037852
FAM46A	ENSG00000112773.11	protein_coding	2943.69	0.23282	0.0825147	2.82156	0.00477911	0.0378879
SPDYE3	ENSG00000214300.6	protein_coding	90.4848	-0.442785	0.156966	-2.8209	0.0047889	0.0379446
WDR45	ENSG00000196998.11	protein_coding	2732.77	0.250647	0.088868	2.82044	0.00479581	0.0379785
XRCC6	ENSG00000196419.8	protein_coding	19455.5	-0.224177	0.0794953	-2.82	0.00480237	0.0380095
GLRX2	ENSG00000023572.4	protein_coding	522.231	0.323895	0.114884	2.81932	0.00481262	0.0380279
SYNCRIP	ENSG00000135316.13	protein_coding	9090.87	-0.184522	0.0654458	-2.81947	0.0048103	0.0380279
GCHFR	ENSG00000137880.4	protein_coding	455.844	0.313261	0.111109	2.8194	0.00481133	0.0380279
GTPBP4	ENSG00000107937.14	protein_coding	4915.4	-0.2057	0.0729803	-2.81857	0.0048238	0.0380953
NCKIPSD	ENSG00000213672.3	protein_coding	3660.88	0.203277	0.0721613	2.81699	0.00484764	0.0382626
SAMHD1	ENSG00000101347.7	protein_coding	2005.17	-0.219373	0.0779509	-2.81425	0.00488913	0.0385689
RP11-412H8.2	ENSG00000258175.1	lincRNA	67.2917	0.471532	0.16766	2.81244	0.00491679	0.0387658
TOMM40	ENSG00000130204.8	protein_coding	4380.98	-0.24367	0.086668	-2.81154	0.00493055	0.0388105
CTSL	ENSG00000135047.10	protein_coding	25667.2	0.25165	0.0894974	2.81182	0.00492627	0.0388105
IMPACT	ENSG00000154059.5	protein_coding	1149.69	0.240129	0.0854057	2.81163	0.00492906	0.0388105
SYT1	ENSG00000067715.9	protein_coding	112.353	-0.431849	0.153744	-2.80887	0.00497151	0.0390713
SERBP1	ENSG00000142864.10	protein_coding	15181.6	-0.191479	0.0681699	-2.80885	0.00497183	0.0390713
PRR16	ENSG00000184838.10	protein_coding	345.275	0.321003	0.114269	2.80919	0.00496663	0.0390713
NIPAL3	ENSG00000001461.12	protein_coding	3758.56	-0.214566	0.0764164	-2.80785	0.00498734	0.0391649
ORC3	ENSG00000135336.10	protein_coding	2026.93	-0.22392	0.0797561	-2.80756	0.00499189	0.0391649
PRPF40A	ENSG00000196504.11	protein_coding	5817.21	-0.193416	0.0688879	-2.8077	0.0049897	0.0391649
DYRK2	ENSG00000127334.10	protein_coding	1209.64	0.243663	0.0868347	2.80606	0.00501514	0.0393258
CYB5D2	ENSG00000167740.5	protein_coding	1269.89	0.242681	0.0865107	2.80521	0.00502837	0.0393961
CASC10	ENSG00000204682.5	protein_coding	96.0946	-0.440564	0.157056	-2.80513	0.00502957	0.0393961
ZPLD1	ENSG00000170044.4	protein_coding	35.9202	-0.476427	0.16986	-2.80483	0.00503432	0.0394118
VKORC1L1	ENSG00000196715.5	protein_coding	1153.84	-0.229781	0.0819372	-2.80436	0.00504172	0.0394483
RHNO1	ENSG00000171792.6	protein_coding	1303.34	-0.259135	0.0924268	-2.80368	0.00505233	0.0394883
RTN4RL2	ENSG00000186907.3	protein_coding	754.409	0.311213	0.111	2.80373	0.00505148	0.0394883
ZBED5	ENSG00000236287.3	protein_coding	2865.36	0.227901	0.0813499	2.8015	0.00508663	0.0397348
SPAG4	ENSG00000061656.5	protein_coding	2592.91	0.277496	0.0990678	2.80107	0.00509341	0.0397662
CYP26B1	ENSG00000003137.4	protein_coding	1234.59	0.230634	0.0823467	2.80077	0.00509811	0.0397813
PLCG1	ENSG00000124181.10	protein_coding	9331.25	0.207584	0.0741243	2.80049	0.00510253	0.0397942
CAPN2	ENSG00000162909.13	protein_coding	66890.7	-0.175358	0.0626212	-2.8003	0.00510558	0.0397965
YES1	ENSG00000176105.9	protein_coding	4292.77	0.251601	0.0898609	2.7999	0.00511188	0.039824
LGR4	ENSG00000205213.9	protein_coding	7003.09	-0.200014	0.0714713	-2.79853	0.00513362	0.0399716
HMGN3	ENSG00000118418.10	protein_coding	2015.56	-0.229012	0.0819032	-2.79613	0.00517189	0.0402479
SMAGP	ENSG00000170545.12	protein_coding	1272.34	-0.258959	0.0926317	-2.79558	0.00518073	0.0402769
PCMTD2	ENSG00000203880.7	protein_coding	4000.61	0.256903	0.0918973	2.79555	0.00518122	0.0402769
AC020571.3	ENSG00000229056.2	antisense	43.8707	-0.473772	0.169505	-2.79503	0.0051895	0.0403195
AP001007.1	ENSG00000203306.3	pseudogene	5846.67	-0.209319	0.0749155	-2.79407	0.00520495	0.0404177
MFSD3	ENSG00000167700.4	protein_coding	1286.54	0.289539	0.103655	2.7933	0.00521737	0.0404923
KDM6B	ENSG00000132510.6	protein_coding	3368.45	0.236095	0.0845294	2.79305	0.00522139	0.0405016
IPO5	ENSG00000065150.14	protein_coding	11028.6	-0.183824	0.0658258	-2.79259	0.00522887	0.0405378
AKAP8	ENSG00000105127.4	protein_coding	3325.86	0.21162	0.075785	2.79238	0.00523219	0.0405417
C5orf34	ENSG00000172244.4	protein_coding	142.046	-0.421812	0.15108	-2.79197	0.00523885	0.0405715
C14orf79	ENSG00000140104.9	protein_coding	875.364	0.254607	0.0912148	2.79129	0.00524989	0.0406351
MMAB	ENSG00000139428.7	protein_coding	2324.06	-0.285893	0.102442	-2.7908	0.00525784	0.0406748
C2orf69	ENSG00000178074.5	protein_coding	548.16	-0.277764	0.0995845	-2.78923	0.00528339	0.0408504
TMEM106B	ENSG00000106460.14	protein_coding	1739.21	0.226725	0.0813207	2.78804	0.00530287	0.0409791
LRFN3	ENSG00000126243.4	protein_coding	1205.75	0.255293	0.0915989	2.78708	0.00531853	0.041078
ZMPSTE24	ENSG00000084073.4	protein_coding	3030.57	-0.207411	0.0744414	-2.78624	0.00533239	0.0411629
KCTD6	ENSG00000168301.8	protein_coding	1231.04	0.248525	0.0892305	2.7852	0.00534945	0.0412725
EGF	ENSG00000138798.7	protein_coding	134.083	-0.418021	0.150116	-2.78465	0.00535863	0.0413212
NEDD4L	ENSG00000049759.12	protein_coding	6611.24	-0.188821	0.0678245	-2.78396	0.00536997	0.0413864
SRC	ENSG00000197122.7	protein_coding	3059.2	0.198588	0.0713463	2.78343	0.00537874	0.0414319
SLC39A4	ENSG00000147804.5	protein_coding	1457.22	0.314854	0.113149	2.78264	0.00539187	0.0415107
AMZ2P1	ENSG00000214174.4	pseudogene	246.66	0.353831	0.127228	2.78107	0.00541794	0.0416892
LINC00989	ENSG00000250334.1	lincRNA	41.9936	0.471499	0.169684	2.77869	0.00545789	0.0419741
HIST2H2BE	ENSG00000184678.8	protein_coding	733.17	0.26658	0.0959493	2.77834	0.00546378	0.041997
PPP5C	ENSG00000011485.10	protein_coding	3896.36	-0.226171	0.0814212	-2.77779	0.00547294	0.0420449
FOXRED2	ENSG00000100350.10	protein_coding	1036.82	-0.26893	0.0968293	-2.77737	0.00548013	0.0420769
NCR3LG1	ENSG00000188211.4	protein_coding	107.792	-0.419818	0.151166	-2.7772	0.00548295	0.0420769
ZNF790	ENSG00000197863.4	protein_coding	412.593	0.293773	0.105804	2.77658	0.00549344	0.0421349
RABEP2	ENSG00000177548.8	protein_coding	1060.72	0.243144	0.0875812	2.77621	0.00549971	0.0421606
PDIA5	ENSG00000065485.13	protein_coding	1592.75	-0.241416	0.0869974	-2.77499	0.00552042	0.0422968
MYO18A	ENSG00000196535.10	protein_coding	6471.88	0.225917	0.0814322	2.77429	0.00553216	0.0423642
KIAA0355	ENSG00000166398.8	protein_coding	2486.08	0.227574	0.0820427	2.77385	0.00553979	0.0424
RAD54B	ENSG00000197275.8	protein_coding	78.9392	-0.447966	0.161556	-2.77283	0.00555719	0.0425106
GTF2IRD2B	ENSG00000174428.12	protein_coding	156.81	0.389949	0.140684	2.7718	0.00557474	0.0426222
CIRBP	ENSG00000099622.9	protein_coding	9365.54	0.186432	0.0672702	2.7714	0.00558159	0.0426327
CCNC	ENSG00000112237.8	protein_coding	1632.18	-0.216828	0.0782384	-2.77137	0.00558205	0.0426327
MALL	ENSG00000144063.3	protein_coding	1017.12	0.277101	0.100007	2.77081	0.00559167	0.0426836
EML1	ENSG00000066629.12	protein_coding	249.515	0.338475	0.122205	2.76973	0.00561024	0.0428026
NPDC1	ENSG00000107281.5	protein_coding	2803.22	0.225413	0.0814628	2.76706	0.00565638	0.0430667
IL1A	ENSG00000115008.5	protein_coding	1797.23	-0.444456	0.160611	-2.76729	0.00565247	0.0430667
CAP1	ENSG00000131236.12	protein_coding	32338.5	-0.18389	0.0664541	-2.76717	0.00565451	0.0430667
TRPV2	ENSG00000187688.10	protein_coding	489.138	0.304267	0.109961	2.76704	0.00565682	0.0430667
SOAT1	ENSG00000057252.8	protein_coding	3815.15	-0.193189	0.0698979	-2.76387	0.00571202	0.0434333
PEAR1	ENSG00000187800.9	protein_coding	576.664	-0.275626	0.0997171	-2.76408	0.00570842	0.0434333
KIAA1737	ENSG00000198894.3	protein_coding	799.105	0.28553	0.103312	2.76376	0.00571403	0.0434333
WDR12	ENSG00000138442.5	protein_coding	1582.58	-0.226069	0.081826	-2.7628	0.00573086	0.0435354
ABCE1	ENSG00000164163.6	protein_coding	5156.78	-0.193555	0.0700616	-2.76264	0.00573352	0.0435354
RPTOR	ENSG00000141564.9	protein_coding	3792.12	0.204949	0.0742008	2.76209	0.00574332	0.0435869
ACSF2	ENSG00000167107.8	protein_coding	1695.46	0.227378	0.0824219	2.75871	0.00580307	0.044017
CCDC138	ENSG00000163006.7	protein_coding	239.764	-0.364919	0.132288	-2.75852	0.0058064	0.0440192
DUSP16	ENSG00000111266.4	protein_coding	1103.4	-0.24169	0.0876604	-2.75712	0.00583124	0.0441609
CDKN2AIPNL	ENSG00000237190.3	protein_coding	1065.73	-0.274779	0.0996603	-2.75715	0.00583069	0.0441609
ZBTB46	ENSG00000130584.6	protein_coding	375.59	0.315691	0.114511	2.75685	0.00583609	0.0441744
MOB3B	ENSG00000120162.9	protein_coding	80.817	0.447544	0.162382	2.75612	0.00584909	0.0442495
HELLS	ENSG00000119969.10	protein_coding	698.711	-0.291314	0.105729	-2.7553	0.00586387	0.044338
APLP1	ENSG00000105290.7	protein_coding	267.379	0.366363	0.133009	2.75443	0.00587947	0.0444326
CCDC28A	ENSG00000024862.12	protein_coding	889.858	0.240963	0.0875125	2.75347	0.00589677	0.0445373
LTBP4	ENSG00000090006.13	protein_coding	8348.59	0.201362	0.0731345	2.75331	0.00589951	0.0445373
SLC30A6	ENSG00000152683.10	protein_coding	1972.71	-0.212194	0.0771018	-2.75213	0.00592083	0.0446748
ELAVL1	ENSG00000066044.9	protein_coding	5634.18	-0.19006	0.0690866	-2.75104	0.00594067	0.044801
UBE2B	ENSG00000119048.3	protein_coding	2733.73	0.217991	0.0792611	2.75029	0.00595431	0.0448804
TLR3	ENSG00000164342.8	protein_coding	243.251	-0.348021	0.126588	-2.74925	0.00597323	0.0449994
SEH1L	ENSG00000085415.11	protein_coding	3385.2	-0.196064	0.0713342	-2.74853	0.00598636	0.0450597
FASN	ENSG00000169710.6	protein_coding	34487.7	-0.198379	0.0721779	-2.74846	0.0059875	0.0450597
EIF5A	ENSG00000132507.13	protein_coding	13508.8	-0.234667	0.0853945	-2.74804	0.00599534	0.0450951
PRICKLE4	ENSG00000124593.10	protein_coding	961.059	0.247593	0.0901149	2.74752	0.00600472	0.0451421
GALC	ENSG00000054983.12	protein_coding	4329.6	-0.205055	0.0746631	-2.7464	0.00602532	0.0452733
MIPEP	ENSG00000027001.7	protein_coding	678.308	-0.265667	0.096787	-2.74487	0.00605356	0.0454617
TOX2	ENSG00000124191.13	protein_coding	2540.27	-0.222554	0.0811289	-2.74321	0.00608416	0.0456677
CCDC163P	ENSG00000236624.4	protein_coding	124.412	-0.411036	0.149918	-2.74174	0.00611156	0.0458494
COL6A3	ENSG00000163359.11	protein_coding	2761.48	-0.213549	0.0778936	-2.74154	0.00611511	0.0458522
ARFRP1	ENSG00000101246.15	protein_coding	4026.8	0.201818	0.0736462	2.74037	0.00613698	0.0459682
SLC38A1	ENSG00000111371.11	protein_coding	12332.4	-0.195489	0.0713328	-2.74052	0.00613421	0.0459682
NBAS	ENSG00000151779.8	protein_coding	3576.49	0.206785	0.0754798	2.73961	0.00615123	0.046051
SIRT4	ENSG00000089163.4	protein_coding	108.316	0.414751	0.151436	2.73879	0.00616666	0.0461037
HSF4	ENSG00000102878.11	protein_coding	1271.31	0.276204	0.100858	2.73855	0.00617108	0.0461037
PEX11A	ENSG00000166821.4	protein_coding	322.291	0.322101	0.117615	2.7386	0.0061701	0.0461037
UBE2E2	ENSG00000182247.5	protein_coding	1466.25	0.273545	0.0998705	2.739	0.0061626	0.0461037
EIF2S1	ENSG00000134001.8	protein_coding	6841.87	-0.204737	0.0747866	-2.73761	0.00618871	0.0462003
SHC1	ENSG00000160691.14	protein_coding	8893.13	0.185434	0.0677381	2.73752	0.00619044	0.0462003
CHRM3-AS2	ENSG00000233355.2	processed_transcript	40.7285	-0.465033	0.169888	-2.73729	0.00619482	0.046209
FBXO6	ENSG00000116663.6	protein_coding	89.608	0.448231	0.16376	2.73711	0.00619809	0.0462095
FERMT2	ENSG00000073712.9	protein_coding	7735.35	-0.239903	0.0876745	-2.73629	0.00621354	0.0463007
CORO1C	ENSG00000110880.6	protein_coding	17230.1	-0.176132	0.0643768	-2.73596	0.0062198	0.0463234
UCHL5	ENSG00000116750.9	protein_coding	1630.6	-0.217103	0.0793567	-2.73579	0.0062231	0.0463239
LIMCH1	ENSG00000064042.13	protein_coding	4718.1	0.27726	0.101355	2.73553	0.00622805	0.0463368
SLC25A4	ENSG00000151729.6	protein_coding	2669.69	0.234395	0.0857419	2.73373	0.00626216	0.0465665
SPIRE2	ENSG00000204991.6	protein_coding	678.019	0.267964	0.0980427	2.73314	0.00627335	0.0466256
VMP1	ENSG00000062716.6	protein_coding	11955.8	0.197944	0.0724368	2.73264	0.00628293	0.0466487
SIPA1L2	ENSG00000116991.6	protein_coding	1119.77	0.238586	0.0873077	2.73271	0.00628158	0.0466487
MEX3A	ENSG00000254726.2	protein_coding	1210.51	0.237445	0.086916	2.73189	0.00629717	0.0467303
THBS3	ENSG00000169231.9	protein_coding	1277.16	0.234782	0.0859632	2.73119	0.00631054	0.0468053
STAT2	ENSG00000170581.9	protein_coding	6585.35	0.213131	0.078085	2.72947	0.00634367	0.0470268
ZDHHC6	ENSG00000023041.7	protein_coding	2517.11	-0.21633	0.0792644	-2.72923	0.00634832	0.047037
RP11-473M20.7	ENSG00000261971.2	antisense	97.9695	0.425707	0.155991	2.72905	0.00635168	0.0470377
CD58	ENSG00000116815.11	protein_coding	3714.88	0.214316	0.0785508	2.72837	0.00636475	0.0470861
SLC12A4	ENSG00000124067.12	protein_coding	2434.37	0.206377	0.0756397	2.72842	0.00636393	0.0470861
HINT3	ENSG00000111911.5	protein_coding	1283.89	-0.24255	0.0889089	-2.72807	0.00637066	0.0471056
SYNGR1	ENSG00000100321.10	protein_coding	243.404	0.354162	0.129842	2.72765	0.00637878	0.0471172
RAB3B	ENSG00000169213.6	protein_coding	294.361	-0.346945	0.127192	-2.72772	0.0063774	0.0471172
STRC	ENSG00000242866.5	protein_coding	41.9426	0.463463	0.169936	2.72728	0.00638585	0.0471452
XK	ENSG00000047597.5	protein_coding	101.063	-0.446173	0.163623	-2.72683	0.00639454	0.0471851
ATRX	ENSG00000085224.16	protein_coding	6469.56	0.219747	0.0805955	2.72654	0.0064002	0.0471984
ZNF557	ENSG00000130544.7	protein_coding	561.683	0.298096	0.109337	2.7264	0.0064029	0.0471984
NEB	ENSG00000183091.15	protein_coding	150.357	0.40749	0.149505	2.7256	0.00641848	0.0472891
PCDHB7	ENSG00000113212.4	protein_coding	119.527	0.406691	0.149291	2.72414	0.00644682	0.0474736
LINC00657	ENSG00000260032.1	lincRNA	25622.8	0.220134	0.0808375	2.72316	0.00646599	0.0475904
TONSL	ENSG00000160949.12	protein_coding	2042.65	-0.258275	0.0948972	-2.72163	0.00649617	0.0477636
FSTL1	ENSG00000163430.5	protein_coding	5331.23	-0.191583	0.070392	-2.72165	0.00649561	0.0477636
SEC61A2	ENSG00000065665.16	protein_coding	554.894	0.273347	0.100465	2.72081	0.00651212	0.0478564
LIMD1	ENSG00000144791.5	protein_coding	4503.82	0.216754	0.0796731	2.72055	0.00651743	0.047871
MTDH	ENSG00000147649.5	protein_coding	8575.1	-0.20225	0.0743523	-2.72015	0.00652518	0.0479035
ADCY3	ENSG00000138031.10	protein_coding	558.774	-0.296352	0.108954	-2.71998	0.00652864	0.0479045
TMEM80	ENSG00000177042.10	protein_coding	880.095	0.282754	0.103961	2.7198	0.00653205	0.047905
FNDC4	ENSG00000115226.5	protein_coding	789.123	0.275238	0.101311	2.71676	0.00659242	0.0482928
ENDOD1	ENSG00000149218.4	protein_coding	3728.92	-0.193047	0.0710611	-2.71663	0.006595	0.0482928
TSKU	ENSG00000182704.6	protein_coding	3691.75	0.221538	0.0815423	2.71685	0.0065906	0.0482928
SLC4A7	ENSG00000033867.12	protein_coding	2630.7	-0.211082	0.0777078	-2.71636	0.00660048	0.0483084
EFNA1	ENSG00000169242.7	protein_coding	1117.62	0.280025	0.103098	2.71611	0.0066054	0.0483198
WDR59	ENSG00000103091.10	protein_coding	1832.05	0.225612	0.0830777	2.71568	0.00661402	0.0483583
PLAT	ENSG00000104368.13	protein_coding	28664.3	0.247038	0.0909891	2.71502	0.00662709	0.0484126
RBM8A	ENSG00000131795.8	protein_coding	6123.65	-0.187849	0.0691901	-2.71497	0.00662817	0.0484126
AC108463.2	ENSG00000227992.1	pseudogene	68.3508	-0.445241	0.164058	-2.71392	0.00664929	0.0485422
SH3PXD2A	ENSG00000107957.12	protein_coding	7517.75	0.211703	0.0780307	2.71307	0.00666625	0.0486413
SDC1	ENSG00000115884.6	protein_coding	4093.23	0.225343	0.0830634	2.7129	0.00666974	0.0486421
TRMU	ENSG00000100416.8	protein_coding	1875.06	-0.245778	0.0906064	-2.71259	0.00667596	0.0486628
STK4	ENSG00000101109.7	protein_coding	4434.42	-0.201295	0.0742341	-2.71162	0.00669553	0.0486752
SNX4	ENSG00000114520.6	protein_coding	1176.2	-0.254011	0.0936656	-2.71189	0.00669001	0.0486752
PLCH1	ENSG00000114805.12	protein_coding	182.945	-0.369044	0.136088	-2.71181	0.00669166	0.0486752
ZNF211	ENSG00000121417.9	protein_coding	1717.06	0.223372	0.0823566	2.71225	0.00668281	0.0486752
TUBB2A	ENSG00000137267.5	protein_coding	1238.18	0.267389	0.098613	2.7115	0.00669795	0.0486752
SPOPL	ENSG00000144228.4	protein_coding	1083.45	0.265717	0.0979772	2.71203	0.00668733	0.0486752
PHTF1	ENSG00000116793.11	protein_coding	2348.4	-0.208457	0.0769049	-2.71058	0.00671658	0.0487814
THBD	ENSG00000178726.6	protein_coding	8883.38	-0.244303	0.0901341	-2.71044	0.00671936	0.0487814
ACBD7	ENSG00000176244.6	protein_coding	124.534	-0.411	0.151768	-2.70809	0.00676727	0.0491045
B4GALNT4	ENSG00000182272.7	protein_coding	645.989	0.267756	0.098888	2.70767	0.00677581	0.0491417
NAA50	ENSG00000121579.8	protein_coding	4035.54	-0.212871	0.078682	-2.70546	0.00682097	0.0494443
RP11-1376P16.2	ENSG00000265678.1	antisense	51.7861	0.458624	0.169542	2.70507	0.00682899	0.0494775
SHMT2	ENSG00000182199.6	protein_coding	6831	-0.242236	0.0895623	-2.70466	0.0068374	0.0495135
HLA-DMA	ENSG00000204257.10	protein_coding	2432.6	0.257837	0.095337	2.70448	0.00684106	0.0495151
GNA15	ENSG00000060558.3	protein_coding	3712.59	-0.231583	0.085657	-2.70361	0.00685911	0.0495755
SPTBN5	ENSG00000137877.8	protein_coding	230.994	-0.385577	0.142617	-2.70358	0.00685974	0.0495755
YWHAZ	ENSG00000164924.13	protein_coding	72898.3	-0.182594	0.0675344	-2.70372	0.00685674	0.0495755
MSANTD3	ENSG00000066697.10	protein_coding	2810.24	-0.213752	0.0790836	-2.70286	0.00687452	0.0495873
AREL1	ENSG00000119682.12	protein_coding	5560.39	-0.184081	0.0681003	-2.70309	0.00686984	0.0495873
CCT3	ENSG00000163468.10	protein_coding	20666.2	-0.222749	0.0824121	-2.70287	0.00687435	0.0495873
SHISA3	ENSG00000178343.4	protein_coding	129.897	-0.414747	0.153449	-2.70283	0.00687516	0.0495873
C20orf112	ENSG00000197183.8	protein_coding	1072.77	0.250499	0.0927189	2.70171	0.00689847	0.0497305
FLVCR1	ENSG00000162769.8	protein_coding	469.065	-0.281028	0.104031	-2.70137	0.00690535	0.0497552
MVD	ENSG00000167508.6	protein_coding	3440.19	-0.253281	0.0938001	-2.70022	0.0069293	0.0499028
AGAP3	ENSG00000133612.14	protein_coding	5131.2	0.19116	0.0708003	2.7	0.00693403	0.0499119
[truncated: 24,956 more rows]

## Sheet: siSCIRT#2 vs siNC
Gene Symbol	Gencode	Biotype	baseMean	log2FoldChange	lfcSE	stat	pvalue	padj
SCG2	ENSG00000171951.4	protein_coding	1249.84	1.0084	0.0867795	11.6203	3.2507e-31	4.33643e-27
DDAH1	ENSG00000153904.14	protein_coding	1748.46	-0.961779	0.0843335	-11.4045	3.97154e-30	2.64901e-26
NEK2	ENSG00000117650.8	protein_coding	1210.43	-1.15565	0.107668	-10.7334	7.09253e-27	3.15381e-23
SLC14A1	ENSG00000141469.12	protein_coding	481.962	1.25664	0.12496	10.0564	8.6096e-24	2.8713e-20
PRR11	ENSG00000068489.8	protein_coding	2356.62	-0.786415	0.0795556	-9.8851	4.83108e-23	1.28893e-19
CTGF	ENSG00000118523.5	protein_coding	4083.04	-0.717979	0.0730756	-9.82515	8.77443e-23	1.95085e-19
DEPDC1	ENSG00000024526.12	protein_coding	1626.5	-0.823128	0.0843366	-9.76004	1.67085e-22	3.18417e-19
SLC6A14	ENSG00000087916.7	protein_coding	228.908	-1.26602	0.130032	-9.73624	2.11229e-22	3.52224e-19
NCAPG	ENSG00000109805.5	protein_coding	2992.16	-0.839718	0.0870755	-9.64357	5.23358e-22	7.75733e-19
DLGAP5	ENSG00000126787.8	protein_coding	5224.22	-0.816471	0.0881873	-9.25838	2.07565e-20	2.76892e-17
BUB1	ENSG00000169679.10	protein_coding	2870.51	-0.863165	0.0935409	-9.22768	2.76568e-20	3.35402e-17
HMGCS1	ENSG00000112972.10	protein_coding	8928.07	-0.61662	0.0671163	-9.18733	4.02723e-20	4.33038e-17
CEP55	ENSG00000138180.11	protein_coding	3173.48	-0.831636	0.0905695	-9.18229	4.22001e-20	4.33038e-17
KIF23	ENSG00000137807.9	protein_coding	2392.35	-0.865716	0.0953296	-9.08129	1.07291e-19	1.02233e-16
CYR61	ENSG00000142871.11	protein_coding	7419.65	-0.670581	0.0744186	-9.01094	2.04298e-19	1.81689e-16
COL7A1	ENSG00000114270.11	protein_coding	8402.71	0.824642	0.093605	8.8098	1.2537e-18	1.04528e-15
NUF2	ENSG00000143228.8	protein_coding	1556.75	-0.820579	0.0932984	-8.79521	1.42785e-18	1.12044e-15
TOP2A	ENSG00000131747.10	protein_coding	17762.7	-0.764839	0.0876198	-8.72906	2.5679e-18	1.9031e-15
BMF	ENSG00000104081.9	protein_coding	1936.38	0.731751	0.084523	8.65742	4.82568e-18	3.38814e-15
TLN1	ENSG00000137076.14	protein_coding	35554.3	0.788387	0.0920014	8.56929	1.04121e-17	6.94487e-15
CENPF	ENSG00000117724.8	protein_coding	11099.5	-0.725264	0.085793	-8.45365	2.82343e-17	1.79355e-14
SERPIND1	ENSG00000099937.6	protein_coding	1542.91	-0.724538	0.0866665	-8.36007	6.26837e-17	3.80091e-14
AURKA	ENSG00000087586.13	protein_coding	4362.63	-0.765878	0.0919254	-8.33151	7.98149e-17	4.62926e-14
DNAH5	ENSG00000039139.9	protein_coding	1065.32	-0.738112	0.0888804	-8.30456	1.00193e-16	5.56909e-14
EDIL3	ENSG00000164176.8	protein_coding	4972.91	0.745271	0.0899776	8.28285	1.20266e-16	6.4174e-14
EMP2	ENSG00000213853.5	protein_coding	1174.65	0.800465	0.0967481	8.2737	1.29862e-16	6.66292e-14
SLC41A1	ENSG00000133065.6	protein_coding	2905.3	0.612595	0.0748245	8.18709	2.67616e-16	1.32222e-13
STEAP3	ENSG00000115107.15	protein_coding	6982.27	0.766972	0.0938674	8.17081	3.06329e-16	1.45944e-13
KCNN4	ENSG00000104783.7	protein_coding	6935.25	0.62385	0.0765376	8.15089	3.61269e-16	1.66184e-13
SHCBP1	ENSG00000171241.4	protein_coding	1069.87	-0.786543	0.0965574	-8.14586	3.76603e-16	1.67463e-13
PSAT1	ENSG00000135069.9	protein_coding	1611.23	-0.771727	0.0950826	-8.11638	4.80275e-16	2.06673e-13
CCNB1	ENSG00000134057.10	protein_coding	6329.08	-0.772564	0.0955982	-8.08137	6.40417e-16	2.58884e-13
MELK	ENSG00000165304.3	protein_coding	1948.75	-0.74424	0.0920579	-8.08448	6.24318e-16	2.58884e-13
HMGB2	ENSG00000164104.7	protein_coding	5576.55	-0.767057	0.0954013	-8.04032	8.9603e-16	3.5156e-13
ARHGAP11A	ENSG00000198826.6	protein_coding	2034.28	-0.718503	0.0897592	-8.00479	1.19673e-15	4.56124e-13
NUSAP1	ENSG00000137804.8	protein_coding	3772.81	-0.73053	0.0916067	-7.97463	1.52832e-15	5.66327e-13
CCNA2	ENSG00000145386.5	protein_coding	3191.56	-0.746071	0.0938181	-7.95231	1.83069e-15	6.60039e-13
SYS1	ENSG00000204070.5	protein_coding	1560.31	0.64197	0.0812048	7.90557	2.6672e-15	9.36328e-13
TPX2	ENSG00000088325.11	protein_coding	9102.59	-0.718899	0.0910462	-7.89598	2.88052e-15	9.85285e-13
MKI67	ENSG00000148773.8	protein_coding	13637.9	-0.77896	0.0987047	-7.89183	2.97796e-15	9.9315e-13
CDCA8	ENSG00000134690.6	protein_coding	2367.58	-0.787894	0.100226	-7.86115	3.80614e-15	1.23839e-12
COL6A1	ENSG00000142156.10	protein_coding	16839.3	0.541302	0.0692613	7.81536	5.48073e-15	1.74078e-12
NCAPH	ENSG00000121152.5	protein_coding	1915.66	-0.78427	0.10088	-7.77429	7.58725e-15	2.35381e-12
INSIG1	ENSG00000186480.8	protein_coding	11814.9	-0.555222	0.0715936	-7.75519	8.82091e-15	2.67434e-12
MCM3	ENSG00000112118.13	protein_coding	7444.09	-0.688436	0.0895622	-7.68668	1.50999e-14	4.47629e-12
TTK	ENSG00000112742.5	protein_coding	1544.67	-0.748894	0.0977491	-7.66139	1.83937e-14	5.33418e-12
ANXA3	ENSG00000138772.8	protein_coding	3586.84	-0.629199	0.0823655	-7.63911	2.18731e-14	6.20823e-12
HMMR	ENSG00000072571.15	protein_coding	256.425	-0.968125	0.127003	-7.62285	2.4814e-14	6.89624e-12
DIAPH3	ENSG00000139734.13	protein_coding	1159.45	-0.748521	0.0987452	-7.58033	3.44677e-14	9.38365e-12
ANGPT1	ENSG00000154188.5	protein_coding	339.96	0.891529	0.117861	7.56422	3.90203e-14	1.04106e-11
CHRDL1	ENSG00000101938.10	protein_coding	1348.39	0.860671	0.114493	7.51722	5.59539e-14	1.46358e-11
TMEM97	ENSG00000109084.9	protein_coding	1228.49	-0.652553	0.0881868	-7.39967	1.36528e-13	3.50247e-11
TOP1MT	ENSG00000184428.8	protein_coding	1780.18	0.739952	0.100551	7.359	1.85295e-13	4.66383e-11
TK2	ENSG00000166548.11	protein_coding	2389.76	0.630424	0.0857133	7.35503	1.90878e-13	4.69547e-11
CKAP2L	ENSG00000169607.8	protein_coding	1520.08	-0.740348	0.100684	-7.35315	1.93591e-13	4.69547e-11
XPR1	ENSG00000143324.9	protein_coding	1903.45	0.65941	0.0899664	7.32951	2.3099e-13	5.5025e-11
DTL	ENSG00000143476.13	protein_coding	1213.79	-0.772161	0.105453	-7.32229	2.43767e-13	5.705e-11
AURKB	ENSG00000178999.8	protein_coding	1590.53	-0.781927	0.106979	-7.30919	2.68754e-13	6.18134e-11
GTSE1	ENSG00000075218.14	protein_coding	1712.06	-0.664309	0.0913115	-7.2752	3.45917e-13	7.82124e-11
ANLN	ENSG00000011426.6	protein_coding	5668.44	-0.620246	0.085408	-7.26215	3.80989e-13	8.47065e-11
SNED1	ENSG00000162804.9	protein_coding	2531.81	0.650836	0.0896753	7.25769	3.9375e-13	8.61085e-11
KIF2C	ENSG00000142945.8	protein_coding	4161.2	-0.71549	0.0986235	-7.25476	4.02375e-13	8.65754e-11
ECT2	ENSG00000114346.9	protein_coding	5017.25	-0.521735	0.0721212	-7.23415	4.68461e-13	9.91948e-11
APCDD1L	ENSG00000198768.6	protein_coding	3409.1	0.656077	0.0908001	7.22551	4.99225e-13	1.04057e-10
CSGALNACT1	ENSG00000147408.10	protein_coding	1162.69	0.649432	0.0901112	7.207	5.7198e-13	1.17388e-10
CDC20	ENSG00000117399.9	protein_coding	4452.94	-0.691076	0.0963043	-7.17596	7.18016e-13	1.45126e-10
BRCA1	ENSG00000012048.15	protein_coding	828.164	-0.777329	0.108454	-7.16735	7.64607e-13	1.52237e-10
YWHAH	ENSG00000128245.10	protein_coding	3286.15	0.553261	0.0772357	7.16328	7.87686e-13	1.54525e-10
KIAA1524	ENSG00000163507.9	protein_coding	1291.75	-0.639553	0.0893311	-7.15936	8.10539e-13	1.56704e-10
NUDT15	ENSG00000136159.3	protein_coding	842.267	0.697955	0.098374	7.09491	1.29435e-12	2.46667e-10
NDC80	ENSG00000080986.8	protein_coding	1965.4	-0.707628	0.0999741	-7.07811	1.46134e-12	2.74567e-10
ASF1B	ENSG00000105011.4	protein_coding	2222.82	-0.720911	0.101908	-7.07416	1.50356e-12	2.78576e-10
PBK	ENSG00000168078.5	protein_coding	1321.32	-0.682563	0.0966589	-7.06157	1.64633e-12	3.00851e-10
HJURP	ENSG00000123485.7	protein_coding	3171.73	-0.663942	0.0942453	-7.04483	1.85684e-12	3.31804e-10
ALCAM	ENSG00000170017.8	protein_coding	8449.93	0.700737	0.0994774	7.04419	1.86546e-12	3.31804e-10
CERCAM	ENSG00000167123.14	protein_coding	7293.53	0.630065	0.0895597	7.03514	1.99065e-12	3.49412e-10
PLK4	ENSG00000142731.6	protein_coding	1224.15	-0.700551	0.100025	-7.00376	2.49184e-12	4.31702e-10
PTTG1	ENSG00000164611.8	protein_coding	3947.98	-0.788293	0.11269	-6.99521	2.64857e-12	4.52974e-10
KIF18B	ENSG00000186185.9	protein_coding	1615.71	-0.742147	0.106386	-6.97602	3.03657e-12	5.12758e-10
RBM15B	ENSG00000179837.6	protein_coding	4785.1	0.476138	0.0683679	6.96436	3.29906e-12	5.50119e-10
KIF14	ENSG00000118193.7	protein_coding	1546.6	-0.715603	0.103071	-6.94284	3.843e-12	6.32909e-10
GDF11	ENSG00000135414.5	protein_coding	552.417	0.685386	0.0989222	6.92854	4.25211e-12	6.91745e-10
CPNE2	ENSG00000140848.12	protein_coding	1505.71	0.585071	0.0845331	6.92121	4.47809e-12	7.09758e-10
FANCD2	ENSG00000144554.6	protein_coding	678.961	-0.752306	0.108693	-6.9214	4.47216e-12	7.09758e-10
ESCO2	ENSG00000171320.10	protein_coding	306.57	-0.804946	0.116325	-6.91981	4.52245e-12	7.09758e-10
UBE2C	ENSG00000175063.12	protein_coding	4028.97	-0.665479	0.0963593	-6.90622	4.97727e-12	7.72055e-10
GGT1	ENSG00000100031.14	protein_coding	2604.39	0.617908	0.089635	6.8936	5.43976e-12	8.34096e-10
LGALS3	ENSG00000131981.11	protein_coding	18726.5	0.517101	0.0751118	6.88442	5.80222e-12	8.79564e-10
KIFC1	ENSG00000237649.3	protein_coding	2213.76	-0.643875	0.0936087	-6.87837	6.05411e-12	9.07436e-10
CENPQ	ENSG00000031691.6	protein_coding	562.679	-0.820286	0.119335	-6.87382	6.25072e-12	9.16315e-10
TRIB2	ENSG00000071575.7	protein_coding	13551.8	0.544685	0.0792266	6.87502	6.19798e-12	9.16315e-10
LSM14A	ENSG00000257103.4	protein_coding	4231.78	0.612563	0.089183	6.86861	6.48299e-12	9.40034e-10
TCN1	ENSG00000134827.3	protein_coding	840.765	-0.647021	0.0947303	-6.83013	8.48362e-12	1.2169e-09
IL10RB	ENSG00000243646.4	protein_coding	688.47	0.686201	0.101092	6.7879	1.13778e-11	1.61467e-09
KIF20B	ENSG00000138182.10	protein_coding	2115.32	-0.667462	0.0985095	-6.77561	1.2388e-11	1.73954e-09
BIRC5	ENSG00000089685.10	protein_coding	883.53	-0.773786	0.114254	-6.77252	1.26562e-11	1.75868e-09
A2M	ENSG00000175899.10	protein_coding	1721.23	0.592972	0.0876208	6.76747	1.31049e-11	1.80227e-09
NEIL3	ENSG00000109674.3	protein_coding	316.183	-0.850766	0.125946	-6.75503	1.42807e-11	1.94392e-09
PLXNB2	ENSG00000196576.10	protein_coding	12582.3	0.457622	0.067761	6.75347	1.44349e-11	1.94506e-09
MLF1IP	ENSG00000151725.7	protein_coding	1970	-0.707697	0.105039	-6.73749	1.61148e-11	2.14971e-09
MYBL2	ENSG00000101057.11	protein_coding	1481.07	-0.728924	0.108463	-6.7205	1.81102e-11	2.39198e-09
HMGN2	ENSG00000198830.6	protein_coding	15254	-0.539857	0.0803589	-6.71808	1.84139e-11	2.40825e-09
MUC1	ENSG00000185499.12	protein_coding	1547.32	0.698154	0.10411	6.70595	2.00094e-11	2.59151e-09
MRC2	ENSG00000011028.9	protein_coding	5199.6	0.484104	0.0722848	6.69717	2.1249e-11	2.69964e-09
WDHD1	ENSG00000198554.7	protein_coding	1815.14	-0.613469	0.0915945	-6.69766	2.11786e-11	2.69964e-09
CDCA5	ENSG00000146670.5	protein_coding	2250.58	-0.688291	0.102801	-6.6954	2.15088e-11	2.70686e-09
SLC7A11	ENSG00000151012.9	protein_coding	2886.78	-0.682292	0.102051	-6.6858	2.29666e-11	2.86331e-09
GNB1	ENSG00000078369.13	protein_coding	26849	0.491606	0.0735633	6.68276	2.3448e-11	2.87499e-09
CCNB2	ENSG00000157456.3	protein_coding	2129.78	-0.668874	0.100094	-6.68249	2.34913e-11	2.87499e-09
LMNB1	ENSG00000113368.7	protein_coding	3516.45	-0.629997	0.0944846	-6.66772	2.59806e-11	3.15074e-09
HAT1	ENSG00000128708.8	protein_coding	1669.61	-0.592153	0.0891609	-6.6414	3.10718e-11	3.73421e-09
TNFRSF1B	ENSG00000028137.12	protein_coding	2141.21	0.543717	0.0819143	6.63764	3.18755e-11	3.7643e-09
WDR62	ENSG00000075702.12	protein_coding	1409.33	-0.670578	0.101027	-6.63758	3.18865e-11	3.7643e-09
SPEG	ENSG00000072195.10	protein_coding	1802.4	0.60222	0.0910378	6.61506	3.71409e-11	4.34614e-09
SMC4	ENSG00000113810.11	protein_coding	3836.29	-0.517124	0.0782781	-6.60624	3.94197e-11	4.57268e-09
COL5A1	ENSG00000130635.11	protein_coding	15899.5	0.537988	0.0815123	6.60008	4.10922e-11	4.72561e-09
SPDL1	ENSG00000040275.12	protein_coding	2066.48	-0.586031	0.0889436	-6.58879	4.43435e-11	5.05592e-09
CENPE	ENSG00000138778.7	protein_coding	2535.57	-0.627169	0.0954865	-6.56815	5.09457e-11	5.75945e-09
RACGAP1	ENSG00000161800.8	protein_coding	3367.69	-0.638635	0.0974024	-6.55667	5.50241e-11	6.16825e-09
F2RL1	ENSG00000164251.4	protein_coding	23263.3	-0.429571	0.0655516	-6.55317	5.63273e-11	6.26171e-09
ODC1	ENSG00000115758.8	protein_coding	5152.12	-0.541108	0.0825904	-6.55171	5.68818e-11	6.2711e-09
MOGS	ENSG00000115275.7	protein_coding	5836.64	0.487605	0.0745173	6.54351	6.00931e-11	6.51741e-09
SKA1	ENSG00000154839.5	protein_coding	468.638	-0.747762	0.114269	-6.54385	5.9956e-11	6.51741e-09
CDK1	ENSG00000170312.11	protein_coding	2978.5	-0.679477	0.103896	-6.53999	6.15243e-11	6.61883e-09
THG1L	ENSG00000113272.9	protein_coding	744.116	0.662209	0.101519	6.523	6.89129e-11	7.35439e-09
FANCI	ENSG00000140525.13	protein_coding	1714.4	-0.636197	0.0976357	-6.51602	7.21956e-11	7.64357e-09
SKA3	ENSG00000165480.11	protein_coding	693.828	-0.685502	0.105665	-6.48753	8.72572e-11	9.16544e-09
ZNF367	ENSG00000165244.6	protein_coding	530.845	-0.707361	0.109329	-6.47001	9.79959e-11	1.0213e-08
CD22	ENSG00000012124.10	protein_coding	610.446	-0.748315	0.116421	-6.42764	1.29597e-10	1.34017e-08
DDR1	ENSG00000204580.7	protein_coding	4941.8	0.484934	0.0756533	6.40994	1.45574e-10	1.49382e-08
SPAG5	ENSG00000076382.12	protein_coding	3253.76	-0.639163	0.0997877	-6.40522	1.5015e-10	1.52901e-08
NCAPD2	ENSG00000010292.8	protein_coding	6868.04	-0.534416	0.0835002	-6.40018	1.55199e-10	1.56845e-08
VIPR1	ENSG00000114812.8	protein_coding	6997.95	0.489773	0.0769359	6.36599	1.94034e-10	1.94617e-08
MCM10	ENSG00000065328.12	protein_coding	820.639	-0.671497	0.10572	-6.35167	2.12988e-10	2.12034e-08
ARHGAP19	ENSG00000213390.6	protein_coding	645.569	-0.657404	0.103584	-6.34658	2.20161e-10	2.17551e-08
FER1L4	ENSG00000088340.11	pseudogene	988.449	0.612379	0.0966129	6.33848	2.32045e-10	2.27608e-08
CDC6	ENSG00000094804.5	protein_coding	1809.07	-0.661319	0.104505	-6.32812	2.48166e-10	2.41645e-08
BUB1B	ENSG00000156970.8	protein_coding	1789.29	-0.598232	0.0946018	-6.32369	2.55384e-10	2.46871e-08
MAPK3	ENSG00000102882.7	protein_coding	2302.7	0.607852	0.0962201	6.3173	2.66165e-10	2.53618e-08
MYBL1	ENSG00000185697.12	protein_coding	546.931	-0.661472	0.104698	-6.31788	2.65175e-10	2.53618e-08
HIPK3	ENSG00000110422.7	protein_coding	3507.07	0.699822	0.11091	6.30982	2.79363e-10	2.64305e-08
BRIP1	ENSG00000136492.4	protein_coding	710.173	-0.660821	0.104903	-6.29937	2.98857e-10	2.8035e-08
MUC5AC	ENSG00000215182.6	protein_coding	845.86	0.714596	0.113455	6.29851	3.00525e-10	2.8035e-08
IL6ST	ENSG00000134352.15	protein_coding	11112.1	0.648474	0.103047	6.29297	3.11445e-10	2.88519e-08
RFC3	ENSG00000133119.8	protein_coding	506.315	-0.703115	0.111771	-6.29065	3.16139e-10	2.90848e-08
ANXA10	ENSG00000109511.6	protein_coding	465.143	-0.649903	0.10366	-6.26955	3.62083e-10	3.30835e-08
CIT	ENSG00000122966.9	protein_coding	4358.59	-0.621136	0.0991093	-6.26719	3.67631e-10	3.33619e-08
TFRC	ENSG00000072274.8	protein_coding	4430.13	-0.493756	0.0788536	-6.26169	3.80833e-10	3.43265e-08
POLR3E	ENSG00000058600.11	protein_coding	1636.43	0.503214	0.0805394	6.24805	4.15621e-10	3.72107e-08
CADM4	ENSG00000105767.2	protein_coding	614.625	0.612121	0.098106	6.23938	4.39307e-10	3.9069e-08
NCOA7	ENSG00000111912.14	protein_coding	1853.86	-0.522407	0.084023	-6.21743	5.05363e-10	4.4646e-08
PTPRU	ENSG00000060656.15	protein_coding	9077.92	0.439506	0.0707199	6.21475	5.14076e-10	4.51169e-08
EXO1	ENSG00000174371.12	protein_coding	673.903	-0.756959	0.122254	-6.19167	5.95287e-10	5.19028e-08
SEMA4F	ENSG00000135622.8	protein_coding	790.992	0.573236	0.0927692	6.17917	6.44402e-10	5.58203e-08
FOXM1	ENSG00000111206.8	protein_coding	2241.89	-0.604452	0.097877	-6.17562	6.5903e-10	5.67191e-08
KIAA0101	ENSG00000166803.6	protein_coding	518.134	-0.744203	0.120668	-6.16737	6.94356e-10	5.93763e-08
C7	ENSG00000112936.14	protein_coding	304.666	0.740306	0.120162	6.16091	7.23292e-10	6.14568e-08
IGF2BP3	ENSG00000136231.9	protein_coding	2480.71	-0.456528	0.0741809	-6.15425	7.5434e-10	6.36892e-08
ORC1	ENSG00000085840.8	protein_coding	470.66	-0.694937	0.112948	-6.15274	7.61549e-10	6.38666e-08
DKK1	ENSG00000107984.5	protein_coding	2297.05	-0.520461	0.0846164	-6.15083	7.70803e-10	6.38666e-08
TRIM47	ENSG00000132481.2	protein_coding	1536.26	0.528648	0.0859406	6.15132	7.68401e-10	6.38666e-08
NKIRAS1	ENSG00000197885.6	protein_coding	845.419	-0.602403	0.0982389	-6.13202	8.67705e-10	7.14518e-08
KNTC1	ENSG00000184445.7	protein_coding	2852.73	-0.506205	0.0825803	-6.12986	8.79573e-10	7.19847e-08
KPNA2	ENSG00000182481.4	protein_coding	12884.8	-0.51908	0.0848576	-6.11707	9.53098e-10	7.75264e-08
CYTH4	ENSG00000100055.16	protein_coding	1743.54	0.492182	0.080604	6.10617	1.0205e-09	8.25059e-08
E2F1	ENSG00000101412.9	protein_coding	1457.47	-0.644206	0.105577	-6.10178	1.04892e-09	8.42928e-08
C4orf21	ENSG00000138658.11	protein_coding	456.838	-0.661813	0.108503	-6.09949	1.06409e-09	8.49995e-08
CCNF	ENSG00000162063.8	protein_coding	1207.57	-0.631185	0.103564	-6.09465	1.09679e-09	8.70901e-08
ERCC6L	ENSG00000186871.5	protein_coding	839.209	-0.656731	0.107934	-6.08456	1.16814e-09	9.22073e-08
SAR1B	ENSG00000152700.9	protein_coding	1527.98	0.591546	0.097239	6.08342	1.17645e-09	9.23164e-08
ARHGAP11B	ENSG00000187951.6	protein_coding	579.655	-0.633473	0.104597	-6.05633	1.39262e-09	1.08641e-07
LMO7	ENSG00000136153.15	protein_coding	7324.92	-0.480558	0.0793964	-6.05264	1.42489e-09	1.10512e-07
F13A1	ENSG00000124491.11	protein_coding	472.83	-0.709616	0.117415	-6.04367	1.50643e-09	1.16161e-07
WNT7B	ENSG00000188064.5	protein_coding	1719.99	0.50122	0.0829856	6.03985	1.54261e-09	1.18267e-07
EIF3F	ENSG00000175390.8	protein_coding	8245.97	0.40748	0.0675323	6.03386	1.60091e-09	1.22035e-07
TNC	ENSG00000041982.10	protein_coding	13701.9	0.555195	0.092179	6.02301	1.71202e-09	1.29764e-07
BMP4	ENSG00000125378.11	protein_coding	8955.94	0.422863	0.0702834	6.01655	1.78179e-09	1.34288e-07
PLB1	ENSG00000163803.8	protein_coding	696.638	-0.576267	0.0958184	-6.01416	1.80821e-09	1.35514e-07
RCSD1	ENSG00000198771.6	protein_coding	913.07	-0.606442	0.100883	-6.01133	1.84013e-09	1.37136e-07
ITGB1	ENSG00000150093.14	protein_coding	82732.8	-0.38074	0.0635886	-5.98755	2.13024e-09	1.57874e-07
RP5-1120P11.1	ENSG00000237686.2	antisense	200.882	-0.82551	0.138216	-5.97262	2.33469e-09	1.72071e-07
CKS2	ENSG00000123975.4	protein_coding	3099.01	-0.672017	0.112967	-5.94878	2.70144e-09	1.98007e-07
IQGAP3	ENSG00000183856.6	protein_coding	5246.83	-0.584015	0.0983109	-5.94048	2.8418e-09	2.07156e-07
CASC5	ENSG00000137812.15	protein_coding	1350.84	-0.570647	0.0961171	-5.937	2.90286e-09	2.10457e-07
NGFR	ENSG00000064300.4	protein_coding	437.542	0.749968	0.126412	5.93272	2.9796e-09	2.14853e-07
ZWINT	ENSG00000122952.12	protein_coding	3344.59	-0.657342	0.111173	-5.91277	3.36408e-09	2.41274e-07
STMN3	ENSG00000197457.5	protein_coding	1510.88	0.585575	0.0992063	5.9026	3.57828e-09	2.55263e-07
GCNT2	ENSG00000111846.11	protein_coding	3762.6	-0.44303	0.0751738	-5.89341	3.78308e-09	2.68438e-07
ATP11C	ENSG00000101974.10	protein_coding	1790.61	0.569891	0.0971141	5.86826	4.40379e-09	3.10828e-07
SRP54	ENSG00000100883.7	protein_coding	4169.87	-0.405169	0.0691588	-5.85853	4.66973e-09	3.27864e-07
MASTL	ENSG00000120539.10	protein_coding	1422.12	-0.549282	0.0937805	-5.8571	4.71025e-09	3.28977e-07
IQSEC1	ENSG00000144711.9	protein_coding	1450.65	0.578131	0.0987455	5.85476	4.77689e-09	3.31894e-07
CKAP2	ENSG00000136108.10	protein_coding	3077.69	-0.494634	0.0847252	-5.8381	5.28008e-09	3.64955e-07
DHCR24	ENSG00000116133.7	protein_coding	18947.3	-0.422882	0.0725573	-5.82825	5.60122e-09	3.85156e-07
FEN1	ENSG00000168496.3	protein_coding	3701.18	-0.568096	0.0974921	-5.8271	5.63996e-09	3.85831e-07
SERPINB2	ENSG00000197632.4	protein_coding	131.29	-0.882725	0.152069	-5.80474	6.44641e-09	4.38751e-07
FBXO43	ENSG00000156509.9	protein_coding	258.776	-0.70931	0.12222	-5.80356	6.49225e-09	4.39628e-07
AGR2	ENSG00000106541.7	protein_coding	5681.02	-0.459012	0.0791513	-5.79917	6.66429e-09	4.48998e-07
SQLE	ENSG00000104549.7	protein_coding	2118.18	-0.470825	0.0814107	-5.78333	7.32349e-09	4.90931e-07
UCK1	ENSG00000130717.8	protein_coding	1634.49	0.512788	0.0888015	5.77454	7.71658e-09	5.14214e-07
CDC25C	ENSG00000158402.14	protein_coding	609.266	-0.688667	0.119273	-5.77385	7.7479e-09	5.14214e-07
TYMS	ENSG00000176890.11	protein_coding	1325.75	-0.521176	0.0902933	-5.77204	7.83176e-09	5.17206e-07
SPOCK1	ENSG00000152377.8	protein_coding	724.778	-0.561087	0.0972546	-5.76926	7.96209e-09	5.23223e-07
CKS1B	ENSG00000173207.8	protein_coding	4147.12	-0.537224	0.0932929	-5.75847	8.48804e-09	5.55051e-07
RBL1	ENSG00000080839.7	protein_coding	1004.17	-0.556688	0.0970308	-5.73723	9.62378e-09	6.2625e-07
SYT12	ENSG00000173227.9	protein_coding	1197.88	0.508592	0.0887785	5.72878	1.01156e-08	6.55061e-07
ATAD5	ENSG00000176208.4	protein_coding	378.289	-0.641088	0.112138	-5.71698	1.08436e-08	6.98811e-07
ASPM	ENSG00000066279.12	protein_coding	4313.07	-0.530669	0.0928581	-5.71483	1.09811e-08	7.04269e-07
RNF182	ENSG00000180537.8	protein_coding	1032.44	0.593012	0.103784	5.71389	1.10423e-08	7.04807e-07
RFC5	ENSG00000111445.9	protein_coding	1529.36	-0.60796	0.106463	-5.7105	1.12644e-08	7.1475e-07
PLXNA3	ENSG00000130827.5	protein_coding	7642.68	0.433176	0.0758642	5.70988	1.13053e-08	7.1475e-07
HID1	ENSG00000167861.11	protein_coding	4335.74	0.439396	0.077	5.70644	1.15363e-08	7.25916e-07
PRPS1	ENSG00000147224.6	protein_coding	2050.02	-0.444762	0.0779531	-5.7055	1.16e-08	7.26498e-07
ESPL1	ENSG00000135476.7	protein_coding	1681.82	-0.575393	0.100989	-5.69757	1.2153e-08	7.57572e-07
RRM2	ENSG00000171848.9	protein_coding	3666.8	-0.565323	0.0992711	-5.69474	1.23563e-08	7.66662e-07
REEP2	ENSG00000132563.11	protein_coding	917.339	0.525382	0.0922859	5.69297	1.24845e-08	7.6772e-07
NLRP3	ENSG00000162711.12	protein_coding	724.723	-0.645826	0.113444	-5.69292	1.24884e-08	7.6772e-07
EPB41L4B	ENSG00000095203.10	protein_coding	1252.99	-0.553968	0.0973299	-5.69165	1.25817e-08	7.69906e-07
ZDHHC20	ENSG00000180776.11	protein_coding	1189.85	0.610691	0.107432	5.68445	1.31235e-08	7.99394e-07
MR1	ENSG00000153029.10	protein_coding	705.783	-0.526668	0.0927406	-5.67894	1.3553e-08	8.21808e-07
ATAD2	ENSG00000156802.8	protein_coding	3596.22	-0.493236	0.0868838	-5.67696	1.37109e-08	8.27616e-07
CDC25A	ENSG00000164045.7	protein_coding	630.916	-0.696691	0.122798	-5.67349	1.39918e-08	8.40767e-07
TRAIP	ENSG00000183763.4	protein_coding	412.83	-0.676817	0.119439	-5.66664	1.45628e-08	8.71157e-07
TACC3	ENSG00000013810.14	protein_coding	3329.38	-0.554088	0.0978702	-5.66146	1.50093e-08	8.89886e-07
SLC45A4	ENSG00000022567.5	protein_coding	1070.97	0.525642	0.0928401	5.6618	1.49795e-08	8.89886e-07
FAM111B	ENSG00000189057.6	protein_coding	843.11	-0.589245	0.104243	-5.65263	1.58011e-08	9.32684e-07
NT5DC2	ENSG00000168268.6	protein_coding	5178.78	0.479205	0.0848656	5.64664	1.63616e-08	9.61512e-07
F2R	ENSG00000181104.6	protein_coding	4534.28	0.500251	0.0886294	5.6443	1.65858e-08	9.70416e-07
VSIG10L	ENSG00000186806.5	protein_coding	620.384	0.569247	0.100932	5.6399	1.70151e-08	9.91184e-07
DEPDC1B	ENSG00000035499.8	protein_coding	521.849	-0.634123	0.112576	-5.63284	1.77267e-08	1.02815e-06
ICMT	ENSG00000116237.11	protein_coding	5332.18	0.423391	0.0752167	5.62895	1.8131e-08	1.04705e-06
NCAPG2	ENSG00000146918.15	protein_coding	3628.22	-0.518793	0.092198	-5.62694	1.83429e-08	1.05472e-06
CENPI	ENSG00000102384.9	protein_coding	818.012	-0.576225	0.102505	-5.62141	1.89402e-08	1.08439e-06
SGOL1	ENSG00000129810.10	protein_coding	324.117	-0.66029	0.117518	-5.61861	1.925e-08	1.09741e-06
GAS2L3	ENSG00000139354.6	protein_coding	975.087	-0.524042	0.0933318	-5.61482	1.96762e-08	1.11694e-06
CNTRL	ENSG00000119397.12	protein_coding	1190.29	-0.544091	0.0969426	-5.61251	1.99414e-08	1.1272e-06
RRM1	ENSG00000167325.10	protein_coding	4695.62	-0.538286	0.0960024	-5.60701	2.0585e-08	1.15866e-06
DHX40	ENSG00000108406.5	protein_coding	3340.94	0.469833	0.0838408	5.60387	2.09615e-08	1.1749e-06
MMS22L	ENSG00000146263.7	protein_coding	597.234	-0.574079	0.102548	-5.59817	2.16624e-08	1.20332e-06
TMEM194A	ENSG00000166881.5	protein_coding	1915.41	-0.457509	0.0817336	-5.59756	2.17392e-08	1.20332e-06
CENPW	ENSG00000203760.4	protein_coding	498.029	-0.65643	0.11727	-5.5976	2.17338e-08	1.20332e-06
HIST1H2BD	ENSG00000158373.7	protein_coding	2412.99	0.430131	0.0769373	5.59067	2.26197e-08	1.24689e-06
SCAMP1	ENSG00000085365.13	protein_coding	2346.47	0.646267	0.115642	5.5885	2.29034e-08	1.25733e-06
HMGCR	ENSG00000113161.11	protein_coding	7387.19	-0.412609	0.0741863	-5.5618	2.67013e-08	1.45982e-06
KIF15	ENSG00000163808.12	protein_coding	1208.01	-0.623531	0.112234	-5.55561	2.76638e-08	1.50626e-06
FDFT1	ENSG00000079459.8	protein_coding	6429.51	-0.428386	0.077252	-5.5453	2.93449e-08	1.5913e-06
COL6A2	ENSG00000142173.10	protein_coding	3772.33	0.483458	0.0872383	5.54181	2.99354e-08	1.61675e-06
TM4SF1	ENSG00000169908.6	protein_coding	12249.7	-0.450349	0.0815072	-5.52526	3.2899e-08	1.76965e-06
KIF4A	ENSG00000090889.10	protein_coding	2749.96	-0.498561	0.0902984	-5.52125	3.36588e-08	1.79603e-06
COL4A1	ENSG00000187498.10	protein_coding	3742.46	-0.438616	0.0794343	-5.52175	3.35641e-08	1.79603e-06
NEGR1	ENSG00000172260.9	protein_coding	115.466	0.830129	0.150485	5.51637	3.46075e-08	1.8393e-06
INCENP	ENSG00000149503.8	protein_coding	2239.99	-0.479447	0.0870436	-5.50812	3.62676e-08	1.91988e-06
TXNRD1	ENSG00000198431.11	protein_coding	16961.1	-0.37546	0.0682938	-5.49772	3.84731e-08	2.02858e-06
LFNG	ENSG00000106003.8	protein_coding	2142.47	0.452456	0.082314	5.49671	3.86943e-08	2.03221e-06
SERPINE2	ENSG00000135919.8	protein_coding	17678.9	0.492072	0.0896037	5.49165	3.98202e-08	2.08314e-06
VRK1	ENSG00000100749.3	protein_coding	1234.78	-0.523264	0.0953059	-5.49036	4.01115e-08	2.09019e-06
IDI1	ENSG00000067064.6	protein_coding	5354.66	-0.424247	0.0773181	-5.48703	4.08745e-08	2.12166e-06
MAPK6	ENSG00000069956.7	protein_coding	3941.95	-0.396341	0.072301	-5.48183	4.20955e-08	2.16816e-06
TOPBP1	ENSG00000163781.8	protein_coding	2126.03	-0.468031	0.085376	-5.48199	4.20558e-08	2.16816e-06
KLHL4	ENSG00000102271.9	protein_coding	2693.61	-0.428584	0.0782271	-5.47872	4.28408e-08	2.19806e-06
ECE1	ENSG00000117298.10	protein_coding	38672.7	0.363788	0.0665517	5.46625	4.59666e-08	2.3494e-06
OLFML3	ENSG00000116774.7	protein_coding	291.488	0.638276	0.116864	5.46171	4.7157e-08	2.40105e-06
WNK4	ENSG00000126562.12	protein_coding	159.381	-0.786591	0.144507	-5.44328	5.23087e-08	2.65322e-06
MCTP1	ENSG00000175471.15	protein_coding	3956.82	-0.392094	0.0720507	-5.44191	5.27117e-08	2.66354e-06
MAP7D3	ENSG00000129680.11	protein_coding	2331.23	-0.432968	0.0796439	-5.43631	5.43967e-08	2.73831e-06
FAM83D	ENSG00000101447.9	protein_coding	1344.55	-0.536995	0.0989418	-5.42738	5.71874e-08	2.86797e-06
MND1	ENSG00000121211.3	protein_coding	388.816	-0.707764	0.130445	-5.42576	5.77098e-08	2.88333e-06
ERBB3	ENSG00000065361.10	protein_coding	534.281	0.592575	0.10926	5.42355	5.84277e-08	2.9083e-06
SASS6	ENSG00000156876.8	protein_coding	458.278	-0.606453	0.111877	-5.42072	5.93583e-08	2.94364e-06
LDLR	ENSG00000130164.7	protein_coding	43893.4	-0.368908	0.0680878	-5.41812	6.02294e-08	2.9723e-06
ITGB4	ENSG00000132470.9	protein_coding	32638.4	0.408382	0.0753797	5.41767	6.03817e-08	2.9723e-06
DAZAP1	ENSG00000071626.12	protein_coding	4692.71	-0.406196	0.0750388	-5.41314	6.19281e-08	3.02608e-06
AMOTL2	ENSG00000114019.10	protein_coding	1772.24	-0.46184	0.0853141	-5.4134	6.18375e-08	3.02608e-06
MAD2L1	ENSG00000164109.9	protein_coding	1593.6	-0.56594	0.104695	-5.40564	6.45789e-08	3.14409e-06
ALDH9A1	ENSG00000143149.8	protein_coding	3764.44	0.421551	0.078045	5.40138	6.61303e-08	3.20792e-06
CCDC149	ENSG00000181982.13	protein_coding	767.269	0.518785	0.0960886	5.39902	6.70045e-08	3.23855e-06
NES	ENSG00000132688.10	protein_coding	5042.5	0.408701	0.0757929	5.39235	6.95432e-08	3.34912e-06
LZTS3	ENSG00000088899.10	protein_coding	1126.42	0.473552	0.0878345	5.39141	6.99051e-08	3.35444e-06
MRPS6	ENSG00000243927.1	protein_coding	2292.71	0.485158	0.0900449	5.38795	7.1265e-08	3.40744e-06
EZH2	ENSG00000106462.6	protein_coding	2187.38	-0.464447	0.0862671	-5.38382	7.29198e-08	3.47411e-06
MAL2	ENSG00000147676.9	protein_coding	1477.98	-0.445496	0.083063	-5.36335	8.16937e-08	3.87827e-06
POC1A	ENSG00000164087.3	protein_coding	1092.83	-0.545512	0.101762	-5.36066	8.29171e-08	3.92239e-06
FAM72D	ENSG00000215784.4	protein_coding	234.406	-0.750605	0.140127	-5.35658	8.48102e-08	3.99776e-06
RORB	ENSG00000198963.6	protein_coding	280.267	0.703892	0.131515	5.35216	8.69113e-08	4.08238e-06
GPR116	ENSG00000069122.14	protein_coding	33016.3	-0.409058	0.0764392	-5.35142	8.72674e-08	4.08473e-06
MED28	ENSG00000118579.7	protein_coding	2127.78	0.438694	0.0822519	5.33355	9.63132e-08	4.49237e-06
TK1	ENSG00000167900.7	protein_coding	2981.2	-0.570645	0.107133	-5.3265	1.00124e-07	4.65385e-06
TTF2	ENSG00000116830.7	protein_coding	1039.29	-0.501078	0.0941481	-5.32223	1.02502e-07	4.74785e-06
GSTCD	ENSG00000138780.10	protein_coding	577.638	-0.553894	0.104105	-5.32056	1.03448e-07	4.77507e-06
SNPH	ENSG00000101298.9	protein_coding	807.031	0.497607	0.0937128	5.30991	1.09681e-07	5.04532e-06
VGLL4	ENSG00000144560.9	protein_coding	3425.91	0.390781	0.0736195	5.30811	1.10767e-07	5.07778e-06
ANKRD1	ENSG00000148677.6	protein_coding	1262.17	-0.463005	0.0874643	-5.29364	1.19905e-07	5.47784e-06
TROAP	ENSG00000135451.8	protein_coding	1231.57	-0.606932	0.114957	-5.27963	1.29443e-07	5.88834e-06
CDCA2	ENSG00000184661.9	protein_coding	911.852	-0.571047	0.10817	-5.27917	1.29773e-07	5.88834e-06
SCML1	ENSG00000047634.10	protein_coding	918.668	-0.474379	0.089909	-5.27622	1.31878e-07	5.96359e-06
MFSD6	ENSG00000151690.10	protein_coding	2311.28	0.435008	0.0824688	5.27482	1.32885e-07	5.9888e-06
POLQ	ENSG00000051341.9	protein_coding	291.438	-0.635673	0.12074	-5.26481	1.40332e-07	6.26838e-06
KNSTRN	ENSG00000128944.9	protein_coding	1433.93	-0.536794	0.101963	-5.2646	1.40498e-07	6.26838e-06
RTF1	ENSG00000137815.10	protein_coding	3459.45	0.41339	0.0785045	5.26582	1.39567e-07	6.26838e-06
SGOL2	ENSG00000163535.13	protein_coding	1059.59	-0.512116	0.0973055	-5.26298	1.41742e-07	6.28187e-06
SLC43A2	ENSG00000167703.10	protein_coding	3786.02	0.380901	0.0723711	5.26317	1.41596e-07	6.28187e-06
PPP1R14B	ENSG00000173457.6	protein_coding	11062.4	0.533217	0.101485	5.25413	1.48729e-07	6.56968e-06
FANCA	ENSG00000187741.10	protein_coding	1056.44	-0.519941	0.0990939	-5.24695	1.54635e-07	6.808e-06
TMEM71	ENSG00000165071.10	protein_coding	1253.91	-0.484461	0.0923849	-5.24394	1.57187e-07	6.89762e-06
B3GNT1	ENSG00000174684.6	protein_coding	2253.42	0.442765	0.0844489	5.24299	1.57994e-07	6.91027e-06
C11orf82	ENSG00000165490.8	protein_coding	388.406	-0.641947	0.122651	-5.23392	1.65948e-07	7.23448e-06
DAP3	ENSG00000132676.11	protein_coding	3955.81	0.379653	0.0725877	5.23027	1.69267e-07	7.35512e-06
CREG1	ENSG00000143162.7	protein_coding	3487.67	-0.513514	0.0981967	-5.22944	1.70025e-07	7.36406e-06
PLS3	ENSG00000102024.13	protein_coding	14728.2	-0.345023	0.0659965	-5.22789	1.71453e-07	7.40188e-06
MED15	ENSG00000099917.13	protein_coding	3842.9	0.377418	0.0723204	5.21869	1.8019e-07	7.75396e-06
BRI3BP	ENSG00000184992.10	protein_coding	929.103	-0.509993	0.0977634	-5.21661	1.8223e-07	7.81655e-06
MAVS	ENSG00000088888.13	protein_coding	5262.45	0.425108	0.0816006	5.20962	1.89231e-07	8.09082e-06
SMC2	ENSG00000136824.14	protein_coding	3821.25	-0.371754	0.0714213	-5.20509	1.93905e-07	8.26421e-06
CAV1	ENSG00000105974.7	protein_coding	9188.12	-0.340865	0.0656507	-5.19209	2.07943e-07	8.83425e-06
APOBEC3B	ENSG00000179750.11	protein_coding	490.091	-0.591043	0.113903	-5.18901	2.11413e-07	8.95319e-06
STIL	ENSG00000123473.11	protein_coding	2013.82	-0.452347	0.0871846	-5.18838	2.12131e-07	8.95514e-06
TMPO	ENSG00000120802.9	protein_coding	6892.45	-0.468667	0.0903761	-5.18575	2.1515e-07	9.05396e-06
SLC25A29	ENSG00000197119.8	protein_coding	4060.99	0.375318	0.0723848	5.18504	2.15966e-07	9.05972e-06
ADAMTSL3	ENSG00000156218.8	protein_coding	73.198	-0.826626	0.159466	-5.18371	2.1751e-07	9.09586e-06
HS6ST1	ENSG00000136720.6	protein_coding	1478.02	0.425187	0.0820375	5.18284	2.18537e-07	9.11024e-06
TMEM41A	ENSG00000163900.6	protein_coding	1224.03	0.445831	0.0860619	5.18036	2.21461e-07	9.2034e-06
MCM2	ENSG00000073111.9	protein_coding	2063.45	-0.509314	0.098368	-5.17765	2.24703e-07	9.30913e-06
ANO10	ENSG00000160746.8	protein_coding	2662.84	0.474003	0.0917576	5.16582	2.39385e-07	9.88666e-06
EVI2B	ENSG00000185862.5	protein_coding	644.186	-0.525603	0.101854	-5.16034	2.46497e-07	1.0149e-05
GPR173	ENSG00000184194.5	protein_coding	831.12	0.523978	0.101752	5.14955	2.61107e-07	1.07174e-05
PARPBP	ENSG00000185480.7	protein_coding	641.187	-0.543338	0.105674	-5.14164	2.72355e-07	1.11448e-05
HMGN5	ENSG00000198157.6	protein_coding	314.592	-0.653392	0.127106	-5.14054	2.73956e-07	1.11761e-05
ZFYVE9	ENSG00000157077.10	protein_coding	1537.54	0.438131	0.0853076	5.13589	2.80808e-07	1.14207e-05
ZNF558	ENSG00000167785.4	protein_coding	2681.71	0.418485	0.0815244	5.13324	2.84795e-07	1.15476e-05
CLIC4	ENSG00000169504.10	protein_coding	25585.7	0.458992	0.0894702	5.13011	2.89571e-07	1.17057e-05
CEP128	ENSG00000100629.12	protein_coding	327.569	-0.655613	0.128124	-5.11702	3.10399e-07	1.25097e-05
PLEKHM1	ENSG00000225190.4	protein_coding	1822.19	0.422111	0.0826308	5.10839	3.24915e-07	1.30553e-05
CALM2	ENSG00000143933.12	protein_coding	25542.1	-0.370986	0.072663	-5.10557	3.29806e-07	1.32121e-05
ZYX	ENSG00000159840.11	protein_coding	6362.12	0.375559	0.0735955	5.10302	3.34283e-07	1.33513e-05
TNFSF18	ENSG00000120337.7	protein_coding	137.602	-0.763484	0.149826	-5.0958	3.47267e-07	1.38285e-05
GPATCH4	ENSG00000160818.12	protein_coding	1867.14	-0.444075	0.0871733	-5.09417	3.50276e-07	1.39068e-05
ACAT2	ENSG00000120437.7	protein_coding	3858.75	-0.463122	0.0910531	-5.08628	3.65155e-07	1.44545e-05
IMPAD1	ENSG00000104331.4	protein_coding	5478.28	-0.377355	0.0742087	-5.08505	3.67523e-07	1.45052e-05
ZWILCH	ENSG00000174442.7	protein_coding	869.544	-0.519145	0.102153	-5.08203	3.73427e-07	1.46947e-05
HMHA1	ENSG00000180448.6	protein_coding	3129.3	0.401393	0.079003	5.08073	3.75986e-07	1.47519e-05
ERMARD	ENSG00000130023.11	protein_coding	1770.59	0.410292	0.0808494	5.07477	3.87955e-07	1.51769e-05
H2AFZ	ENSG00000164032.7	protein_coding	11083.6	-0.44924	0.0885691	-5.07221	3.93232e-07	1.53384e-05
RFC2	ENSG00000049541.6	protein_coding	1162.99	-0.501955	0.0991201	-5.06411	4.10309e-07	1.59578e-05
UHRF1	ENSG00000034063.9	processed_transcript	2317.91	-0.454655	0.0898478	-5.06028	4.18634e-07	1.62342e-05
KIAA0586	ENSG00000100578.10	protein_coding	2277.43	-0.381289	0.0754586	-5.05296	4.3501e-07	1.68204e-05
ARHGDIB	ENSG00000111348.4	protein_coding	6407.21	-0.454514	0.0899994	-5.05019	4.41377e-07	1.70172e-05
MTHFR	ENSG00000177000.6	protein_coding	1934.85	0.39966	0.0791563	5.049	4.4413e-07	1.7074e-05
NREP	ENSG00000134986.9	protein_coding	2704.35	0.417212	0.0826564	5.04754	4.47524e-07	1.71551e-05
CTD-2510F5.4	ENSG00000265415.1	antisense	239.426	-0.635473	0.12595	-5.04544	4.52485e-07	1.72956e-05
RBBP8	ENSG00000101773.12	protein_coding	2438.08	-0.437016	0.0866858	-5.04138	4.62185e-07	1.76158e-05
PYGB	ENSG00000100994.7	protein_coding	36193.3	0.330755	0.0656683	5.03676	4.7349e-07	1.79953e-05
AQP5	ENSG00000161798.6	protein_coding	97.0482	0.783781	0.155715	5.03342	4.81817e-07	1.82598e-05
TFAP2C	ENSG00000087510.5	protein_coding	3299.67	0.432718	0.0859856	5.03245	4.84241e-07	1.82996e-05
FGFRL1	ENSG00000127418.10	protein_coding	6670.16	0.420441	0.0836184	5.0281	4.95373e-07	1.86674e-05
YPEL3	ENSG00000090238.7	protein_coding	1673.25	0.431975	0.0860481	5.02016	5.16284e-07	1.94006e-05
CDC45	ENSG00000093009.5	protein_coding	639.051	-0.601931	0.120029	-5.01487	5.30692e-07	1.9842e-05
HERPUD2	ENSG00000122557.5	protein_coding	1034.16	0.441963	0.0881325	5.01476	5.31005e-07	1.9842e-05
ERMP1	ENSG00000099219.9	protein_coding	1278.25	0.558505	0.111397	5.01363	5.34117e-07	1.99026e-05
PANK1	ENSG00000152782.12	protein_coding	292.682	-0.611251	0.121943	-5.01261	5.36964e-07	1.99529e-05
CENPA	ENSG00000115163.10	protein_coding	522.541	-0.604506	0.120713	-5.00781	5.50528e-07	2.04001e-05
ANKRD46	ENSG00000186106.7	protein_coding	651.493	0.481343	0.0961395	5.00671	5.5367e-07	2.04597e-05
HS1BP3	ENSG00000118960.8	protein_coding	1484.8	0.460386	0.092106	4.99844	5.77962e-07	2.12984e-05
CDCA3	ENSG00000111665.7	protein_coding	1011.82	-0.599108	0.119973	-4.99367	5.92422e-07	2.17711e-05
ZBTB47	ENSG00000114853.9	protein_coding	1607.95	0.402883	0.0806999	4.99237	5.96436e-07	2.18584e-05
COQ4	ENSG00000167113.6	protein_coding	2511.21	0.385804	0.0773545	4.98748	6.11713e-07	2.23569e-05
KIF20A	ENSG00000112984.7	protein_coding	4470.9	-0.428991	0.0861527	-4.97943	6.37719e-07	2.32436e-05
PGRMC2	ENSG00000164040.12	protein_coding	3256.3	0.418369	0.0840384	4.97831	6.41427e-07	2.33151e-05
FAM20C	ENSG00000177706.8	protein_coding	6764.8	0.394189	0.0794886	4.95907	7.08329e-07	2.56769e-05
LOXL4	ENSG00000138131.3	protein_coding	19766.8	0.419225	0.084773	4.94527	7.60391e-07	2.74895e-05
PCNA	ENSG00000132646.6	protein_coding	4449.78	-0.485669	0.0983097	-4.94019	7.80457e-07	2.81386e-05
FIGNL1	ENSG00000132436.7	protein_coding	763.503	-0.471615	0.0955649	-4.93503	8.0139e-07	2.88155e-05
AMMECR1	ENSG00000101935.5	protein_coding	879.321	-0.443422	0.0899476	-4.92978	8.23241e-07	2.95216e-05
PHF1	ENSG00000112511.13	protein_coding	5460.38	0.446468	0.0907783	4.91823	8.73317e-07	3.12334e-05
UBE2T	ENSG00000077152.5	protein_coding	1457.24	-0.540582	0.109984	-4.91511	8.87345e-07	3.16502e-05
LMCD1	ENSG00000071282.7	protein_coding	273.554	-0.621084	0.126462	-4.91122	9.05102e-07	3.21975e-05
CENPM	ENSG00000100162.10	protein_coding	394.007	-0.6344	0.129196	-4.91038	9.09024e-07	3.2251e-05
H2AFV	ENSG00000105968.14	protein_coding	5929.65	-0.355579	0.0724511	-4.90785	9.20805e-07	3.25823e-05
TMEM156	ENSG00000121895.7	protein_coding	1789.55	-0.430514	0.0877642	-4.90535	9.32629e-07	3.29134e-05
CHAF1A	ENSG00000167670.11	protein_coding	1361.22	-0.473011	0.0965241	-4.90044	9.56211e-07	3.36566e-05
PTBP3	ENSG00000119314.11	protein_coding	4116.37	0.424941	0.0867956	4.89588	9.78669e-07	3.43564e-05
MYH10	ENSG00000133026.8	protein_coding	2087.26	-0.430322	0.0879315	-4.89383	9.88937e-07	3.46258e-05
DBNDD1	ENSG00000003249.9	protein_coding	659.33	0.477043	0.0977071	4.88238	1.04814e-06	3.66027e-05
RIT1	ENSG00000143622.6	protein_coding	2117.73	0.379731	0.0777861	4.88173	1.05157e-06	3.66266e-05
DHCR7	ENSG00000172893.11	protein_coding	11402.4	-0.354952	0.0727306	-4.88037	1.05888e-06	3.67852e-05
PLK1	ENSG00000166851.10	protein_coding	2437.98	-0.477767	0.0980144	-4.87445	1.0911e-06	3.78059e-05
ACTB	ENSG00000075624.9	protein_coding	96972.1	-0.339709	0.0697257	-4.87207	1.10433e-06	3.80664e-05
BRCA2	ENSG00000139618.10	protein_coding	588.198	-0.520449	0.106823	-4.87208	1.10428e-06	3.80664e-05
LTBP3	ENSG00000168056.10	protein_coding	10896.7	0.377152	0.0774482	4.86974	1.11748e-06	3.84206e-05
TMEM184B	ENSG00000198792.8	protein_coding	4752.97	0.38691	0.079485	4.86772	1.12894e-06	3.87149e-05
PPIP5K1	ENSG00000168781.17	protein_coding	1475.17	-0.425433	0.087411	-4.86704	1.13285e-06	3.87492e-05
KBTBD8	ENSG00000163376.7	protein_coding	299.488	-0.603806	0.124079	-4.86632	1.13696e-06	3.87905e-05
DOCK6	ENSG00000130158.9	protein_coding	3956.55	0.353722	0.0727107	4.86478	1.14585e-06	3.89939e-05
PIF1	ENSG00000140451.8	protein_coding	314.841	-0.672514	0.138407	-4.85895	1.1801e-06	4.00573e-05
ARHGEF4	ENSG00000136002.12	protein_coding	1637.38	0.407996	0.0840926	4.85175	1.22379e-06	4.14351e-05
GGT7	ENSG00000131067.12	protein_coding	1202.61	0.413669	0.0853454	4.847	1.25342e-06	4.23306e-05
HMGN4	ENSG00000182952.4	protein_coding	4265.32	0.358772	0.0740587	4.84443	1.26977e-06	4.27746e-05
RP11-34A14.3	ENSG00000230928.1	antisense	145.806	0.682527	0.140953	4.84224	1.28382e-06	4.31388e-05
TMPO-AS1	ENSG00000257167.2	antisense	127.633	-0.73769	0.152503	-4.83721	1.31674e-06	4.4134e-05
ZDHHC1	ENSG00000159714.6	protein_coding	713.162	0.483369	0.100046	4.83148	1.35523e-06	4.53102e-05
CLSPN	ENSG00000092853.9	protein_coding	1040.09	-0.519751	0.107698	-4.826	1.39306e-06	4.64585e-05
HOOK2	ENSG00000095066.7	protein_coding	2817.96	0.355147	0.0736208	4.824	1.40706e-06	4.68083e-05
C1orf112	ENSG00000000460.12	protein_coding	704.371	-0.543136	0.112719	-4.81848	1.44657e-06	4.78841e-05
ITGB8	ENSG00000105855.5	protein_coding	588.363	0.515144	0.106904	4.81874	1.44466e-06	4.78841e-05
FAIM3	ENSG00000162894.7	protein_coding	224.837	-0.606342	0.125928	-4.81499	1.47207e-06	4.86075e-05
HSD17B12	ENSG00000149084.7	protein_coding	3138.65	-0.368121	0.0765036	-4.81181	1.49567e-06	4.92649e-05
RAD51AP1	ENSG00000111247.10	protein_coding	489.826	-0.596327	0.123943	-4.8113	1.4995e-06	4.92691e-05
RAPGEF3	ENSG00000079337.11	protein_coding	729.891	0.476445	0.0991126	4.80712	1.53124e-06	5.01884e-05
RAD18	ENSG00000070950.5	protein_coding	1113.62	-0.447164	0.0931186	-4.80209	1.57014e-06	5.13375e-05
RBM38	ENSG00000132819.12	protein_coding	895.611	0.478616	0.0997283	4.7992	1.593e-06	5.19574e-05
TMEM50B	ENSG00000142188.12	protein_coding	1030.84	0.466909	0.0973684	4.79529	1.62442e-06	5.2853e-05
DKC1	ENSG00000130826.11	protein_coding	4295.13	-0.382633	0.0798131	-4.79412	1.63394e-06	5.30336e-05
SPTLC1	ENSG00000090054.9	protein_coding	3050.88	0.382364	0.0797857	4.79239	1.64805e-06	5.33616e-05
TIMELESS	ENSG00000111602.7	protein_coding	1857.89	-0.449976	0.0941961	-4.77702	1.77915e-06	5.7467e-05
PRIM2	ENSG00000146143.13	protein_coding	763.435	-0.468995	0.0983628	-4.76801	1.86051e-06	5.99496e-05
IL6	ENSG00000136244.7	protein_coding	3151.8	-0.48372	0.101494	-4.76602	1.87901e-06	6.03999e-05
SHANK3	ENSG00000251322.3	protein_coding	529.019	0.553015	0.116104	4.7631	1.90639e-06	6.11329e-05
CHPF	ENSG00000123989.9	protein_coding	6034.26	0.733566	0.15409	4.76062	1.92997e-06	6.17404e-05
APOBEC3G	ENSG00000239713.3	protein_coding	1396.95	0.417903	0.0878954	4.75455	1.98893e-06	6.34744e-05
SLC22A4	ENSG00000197208.5	protein_coding	529.947	0.468993	0.0987471	4.74944	2.03981e-06	6.49428e-05
MAP3K1	ENSG00000095015.5	protein_coding	2970.67	0.451149	0.0950316	4.74736	2.06092e-06	6.53356e-05
BORA	ENSG00000136122.11	protein_coding	439.487	-0.525281	0.110649	-4.74726	2.06194e-06	6.53356e-05
GRAMD4	ENSG00000075240.12	protein_coding	1105.51	0.40639	0.0856303	4.74586	2.07619e-06	6.56313e-05
CIITA	ENSG00000179583.13	protein_coding	3178.24	0.411462	0.0867979	4.74046	2.13236e-06	6.72474e-05
MCM5	ENSG00000100297.11	protein_coding	2143.19	-0.466521	0.0985494	-4.73389	2.20262e-06	6.91365e-05
NIPAL1	ENSG00000163293.7	protein_coding	368.701	-0.63097	0.133279	-4.7342	2.19917e-06	6.91365e-05
RAD51	ENSG00000051180.12	protein_coding	438.118	-0.554421	0.117135	-4.73319	2.21014e-06	6.92095e-05
TACC2	ENSG00000138162.13	protein_coding	4788.22	0.413252	0.0874297	4.72668	2.28224e-06	7.12999e-05
SNX21	ENSG00000124104.14	protein_coding	2050.03	0.394755	0.0835264	4.72611	2.28861e-06	7.13319e-05
CYB5R4	ENSG00000065615.9	protein_coding	1684.71	0.47217	0.0999407	4.7245	2.30684e-06	7.17324e-05
C4B	ENSG00000224389.4	protein_coding	340.98	0.554341	0.117353	4.72371	2.31579e-06	7.18434e-05
BDNF	ENSG00000176697.14	protein_coding	748.761	0.465017	0.098472	4.72232	2.33165e-06	7.21675e-05
KIAA0100	ENSG00000007202.10	protein_coding	15330.2	0.393095	0.0832724	4.72059	2.35164e-06	7.26177e-05
FAM211A	ENSG00000181350.7	protein_coding	286.458	0.574011	0.121615	4.7199	2.35966e-06	7.2697e-05
COA1	ENSG00000106603.13	protein_coding	4314.32	-0.345559	0.0732815	-4.7155	2.41115e-06	7.41124e-05
NUP35	ENSG00000163002.8	protein_coding	537.076	-0.49951	0.105966	-4.71388	2.43042e-06	7.45328e-05
CTIF	ENSG00000134030.9	protein_coding	1827.39	0.37902	0.0805619	4.70471	2.54228e-06	7.77843e-05
PPT1	ENSG00000131238.12	protein_coding	6784.77	-0.390817	0.0831458	-4.70038	2.59683e-06	7.92716e-05
SNRNP27	ENSG00000124380.6	protein_coding	775.221	0.440501	0.0937698	4.69769	2.63124e-06	8.01388e-05
MMP13	ENSG00000137745.7	protein_coding	120.51	0.715691	0.152365	4.69722	2.63732e-06	8.0141e-05
IAH1	ENSG00000134330.14	protein_coding	1505.69	0.391577	0.0833849	4.69601	2.65289e-06	8.04309e-05
TUBA1B	ENSG00000123416.11	protein_coding	11357.1	-0.419211	0.0893581	-4.69136	2.7139e-06	8.19083e-05
LBH	ENSG00000213626.7	protein_coding	588.807	0.512972	0.109336	4.69172	2.7092e-06	8.19083e-05
SS18L1	ENSG00000184402.10	protein_coding	2198.67	0.413249	0.0881292	4.68913	2.74369e-06	8.26205e-05
ABCA2	ENSG00000107331.12	protein_coding	5276.6	0.332238	0.0708629	4.68846	2.75263e-06	8.2693e-05
RFC4	ENSG00000163918.6	protein_coding	1152.27	-0.499181	0.10648	-4.68803	2.7585e-06	8.2693e-05
THBS1	ENSG00000137801.9	protein_coding	14271.4	-0.376724	0.0804302	-4.68386	2.81516e-06	8.42024e-05
SEZ6L2	ENSG00000174938.10	protein_coding	6285.42	0.343093	0.0732997	4.68068	2.85921e-06	8.53285e-05
MTBP	ENSG00000172167.3	protein_coding	628.4	-0.508192	0.108993	-4.66262	3.12205e-06	9.29647e-05
SLC9A3R1	ENSG00000109062.5	protein_coding	7087.09	-0.469643	0.100775	-4.66031	3.15736e-06	9.35981e-05
ATP13A2	ENSG00000159363.13	protein_coding	7551.4	-0.318361	0.0683121	-4.66039	3.15606e-06	9.35981e-05
MSH2	ENSG00000095002.8	protein_coding	2146.79	-0.388952	0.0835402	-4.65586	3.22627e-06	9.54289e-05
MCM6	ENSG00000076003.4	protein_coding	1383.19	-0.460495	0.0989946	-4.65171	3.29187e-06	9.70944e-05
CAMLG	ENSG00000164615.3	protein_coding	2214.16	0.411401	0.088447	4.65138	3.29713e-06	9.70944e-05
HNRNPR	ENSG00000125944.14	protein_coding	9226.78	-0.351912	0.075707	-4.64834	3.34612e-06	9.83199e-05
ARL6IP1	ENSG00000170540.10	protein_coding	6054.83	-0.41038	0.0882965	-4.64775	3.35576e-06	9.83866e-05
FAM109A	ENSG00000198324.10	protein_coding	2496.43	0.366568	0.0790011	4.64003	3.48358e-06	0.00010191
SHOX2	ENSG00000168779.15	protein_coding	1231.63	0.421163	0.0907864	4.63905	3.50012e-06	0.00010217
MTPN	ENSG00000105887.10	protein_coding	4961.41	0.365208	0.0787539	4.63733	3.52937e-06	0.000102799
CHEK1	ENSG00000149554.8	protein_coding	1939.21	-0.349737	0.0754547	-4.63506	3.56829e-06	0.000103706
MBNL1	ENSG00000152601.13	protein_coding	7203.5	-0.331456	0.0715831	-4.63037	3.65022e-06	0.000105627
COL18A1	ENSG00000182871.10	protein_coding	9926.19	0.338133	0.0730202	4.63067	3.6448e-06	0.000105627
SHISA5	ENSG00000164054.11	protein_coding	8106.41	0.360637	0.0779182	4.6284	3.68497e-06	0.000106172
RP11-488P3.1	ENSG00000230439.2	sense_intronic	334.875	-0.522172	0.112818	-4.62844	3.68433e-06	0.000106172
B3GNT7	ENSG00000156966.6	protein_coding	924.311	0.420051	0.0908149	4.62535	3.73969e-06	0.000107516
SYNPO	ENSG00000171992.8	protein_coding	522.596	-0.521205	0.112748	-4.62275	3.78692e-06	0.00010864
SFTA1P	ENSG00000225383.2	lincRNA	692.059	-0.493033	0.106688	-4.62127	3.81398e-06	0.000109181
RCOR2	ENSG00000167771.5	protein_coding	182.559	0.628662	0.136152	4.61736	3.88649e-06	0.000111019
TBC1D31	ENSG00000156787.12	protein_coding	575.185	-0.552684	0.119748	-4.61538	3.92378e-06	0.000111845
SLC6A9	ENSG00000196517.7	protein_coding	3048.46	0.345953	0.0750124	4.61195	3.98909e-06	0.000113464
PLEKHA4	ENSG00000105559.7	protein_coding	1038.48	0.41013	0.0889526	4.61066	4.01401e-06	0.00011393
FOXO4	ENSG00000184481.12	protein_coding	1580.08	0.359753	0.0781947	4.60074	4.20993e-06	0.000119237
TGFB1	ENSG00000105329.5	protein_coding	8469.47	0.403109	0.0878539	4.58841	4.46637e-06	0.000126232
MATN2	ENSG00000132561.9	protein_coding	545.695	0.482936	0.105287	4.58685	4.49979e-06	0.000126907
TRIP13	ENSG00000071539.9	protein_coding	602.946	-0.498073	0.108599	-4.58636	4.51049e-06	0.000126941
VTA1	ENSG00000009844.11	protein_coding	2572.82	-0.337078	0.0735651	-4.58203	4.60476e-06	0.000129049
SEMA6C	ENSG00000143434.11	protein_coding	368.552	0.514085	0.112191	4.58223	4.60043e-06	0.000129049
GPR110	ENSG00000153292.11	protein_coding	2845.15	-0.415314	0.0906545	-4.58128	4.62141e-06	0.000129245
H2AFX	ENSG00000188486.3	protein_coding	2577.51	-0.429426	0.0937519	-4.58046	4.63964e-06	0.000129483
MNS1	ENSG00000138587.5	protein_coding	119.308	-0.683433	0.149273	-4.57841	4.68529e-06	0.000130484
GPR153	ENSG00000158292.6	protein_coding	4098.72	0.358676	0.0784981	4.56923	4.89511e-06	0.000136043
KIAA0556	ENSG00000047578.8	protein_coding	1918.52	0.364197	0.0797889	4.56451	5.00662e-06	0.000138853
VEPH1	ENSG00000197415.7	protein_coding	153.531	-0.638605	0.139967	-4.56255	5.05363e-06	0.000139866
MBTPS1	ENSG00000140943.12	protein_coding	9293.09	0.32948	0.0722544	4.56001	5.11524e-06	0.000141278
POLA2	ENSG00000014138.4	protein_coding	575.753	-0.482098	0.105923	-4.55141	5.32885e-06	0.000146874
EIF5A2	ENSG00000163577.3	protein_coding	732.311	-0.472965	0.104128	-4.54216	5.56807e-06	0.000153151
E2F8	ENSG00000129173.8	protein_coding	383.156	-0.56154	0.123661	-4.54098	5.59945e-06	0.000153697
SAPCD2	ENSG00000186193.7	protein_coding	1079.31	-0.466797	0.102812	-4.54032	5.61696e-06	0.000153822
RP11-64D22.2	ENSG00000240602.3	pseudogene	165.332	-0.631057	0.139001	-4.53994	5.62708e-06	0.000153822
KCNS3	ENSG00000170745.7	protein_coding	877.114	0.422547	0.0931474	4.53632	5.72433e-06	0.000156161
MSN	ENSG00000147065.12	protein_coding	77153.5	-0.301694	0.066553	-4.53314	5.81136e-06	0.000158211
EPHB4	ENSG00000196411.5	protein_coding	4758.82	0.33206	0.0733412	4.52761	5.96539e-06	0.000162074
GINS1	ENSG00000101003.8	protein_coding	557.522	-0.486661	0.107711	-4.51819	6.23701e-06	0.000169109
LIPG	ENSG00000101670.7	protein_coding	770.742	-0.460977	0.102053	-4.51704	6.27103e-06	0.000169687
C17orf103	ENSG00000154035.6	protein_coding	1456.27	0.39828	0.0881941	4.51595	6.30335e-06	0.000170216
DDX10	ENSG00000178105.5	protein_coding	2989.89	-0.32996	0.0730751	-4.51535	6.3212e-06	0.000170324
OLFML2A	ENSG00000185585.15	protein_coding	1769.38	0.448757	0.0993942	4.51492	6.33392e-06	0.000170324
MYCBP	ENSG00000214114.4	protein_coding	807.823	-0.449967	0.0996708	-4.51453	6.34567e-06	0.000170324
NR2F1	ENSG00000175745.7	protein_coding	2873	0.341151	0.0755829	4.5136	6.37363e-06	0.000170389
PNP	ENSG00000198805.7	protein_coding	2861.98	-0.359282	0.079594	-4.51393	6.36375e-06	0.000170389
AP2B1	ENSG00000006125.12	protein_coding	38487	-0.33518	0.0742817	-4.51229	6.41324e-06	0.000171105
PSMD14	ENSG00000115233.7	protein_coding	4380.22	-0.330593	0.0732954	-4.51042	6.46987e-06	0.000172272
ADAMTS16	ENSG00000145536.11	protein_coding	673.933	-0.512327	0.113788	-4.50248	6.71648e-06	0.000178482
ZSWIM8	ENSG00000214655.6	protein_coding	5185.68	0.371953	0.0826924	4.49803	6.85846e-06	0.000181892
SPC24	ENSG00000161888.7	protein_coding	579.457	-0.521303	0.115978	-4.49482	6.96281e-06	0.000184293
LCLAT1	ENSG00000172954.9	protein_coding	1114.56	-0.386539	0.0860984	-4.4895	7.13907e-06	0.000188584
ELOVL5	ENSG00000012660.9	protein_coding	8860.42	-0.302643	0.0674559	-4.48653	7.23921e-06	0.000190852
GFAP	ENSG00000131095.7	protein_coding	433.767	0.500218	0.111576	4.4832	7.35335e-06	0.000193479
FAM64A	ENSG00000129195.11	protein_coding	1344.2	-0.51311	0.114466	-4.48266	7.3718e-06	0.000193582
GLCCI1	ENSG00000106415.8	protein_coding	513.55	0.499608	0.111921	4.46394	8.04659e-06	0.000210636
EME1	ENSG00000154920.10	protein_coding	231.263	-0.602582	0.135008	-4.4633	8.07077e-06	0.000210636
SALL2	ENSG00000165821.7	protein_coding	583.056	0.44784	0.100334	4.46347	8.06418e-06	0.000210636
XRCC2	ENSG00000196584.2	protein_coding	380.543	-0.553492	0.12402	-4.46294	8.08438e-06	0.000210636
EFEMP1	ENSG00000115380.14	protein_coding	591.252	-0.448209	0.100463	-4.46144	8.14092e-06	0.000211696
PPP2R5B	ENSG00000068971.9	protein_coding	2064.98	0.365569	0.0820625	4.45477	8.39849e-06	0.000217969
FTSJ1	ENSG00000068438.10	protein_coding	3008.72	0.342167	0.0768843	4.45041	8.57066e-06	0.000222005
G3BP2	ENSG00000138757.10	protein_coding	13388.2	0.332408	0.0747149	4.44902	8.62614e-06	0.000223009
L1CAM	ENSG00000198910.8	protein_coding	6538.15	0.398547	0.0896	4.44807	8.6646e-06	0.00022357
RMI1	ENSG00000178966.11	protein_coding	545.63	-0.449614	0.101092	-4.44758	8.68421e-06	0.000223644
ATPAF1	ENSG00000123472.8	protein_coding	1240.1	0.369286	0.0830867	4.44459	8.80611e-06	0.000226346
PLXNB3	ENSG00000198753.7	protein_coding	3621.11	0.373593	0.084338	4.42971	9.43586e-06	0.000242066
TUBA1C	ENSG00000167553.10	protein_coding	10655.3	-0.398726	0.0901496	-4.42294	9.73662e-06	0.000249302
SIN3B	ENSG00000127511.5	protein_coding	9084.88	0.309019	0.0698915	4.4214	9.80613e-06	0.000250601
ATE1	ENSG00000107669.13	protein_coding	1680.23	0.376137	0.0851739	4.41611	1.00494e-05	0.000256105
PWWP2B	ENSG00000171813.10	protein_coding	857.171	0.498656	0.112923	4.41588	1.00599e-05	0.000256105
BIN1	ENSG00000136717.10	protein_coding	3279.34	0.356607	0.0807718	4.41499	1.01013e-05	0.000256669
MGST1	ENSG00000008394.8	protein_coding	4000.63	-0.342381	0.0776034	-4.41194	1.0245e-05	0.000259826
SOX4	ENSG00000124766.4	protein_coding	18077.3	0.33354	0.0758047	4.39999	1.08255e-05	0.000274027
GOPC	ENSG00000047932.9	protein_coding	1966	0.381913	0.0868155	4.39914	1.08682e-05	0.000274586
MTFR2	ENSG00000146410.7	protein_coding	250.763	-0.589447	0.134256	-4.39046	1.13113e-05	0.000285242
ROR1	ENSG00000185483.7	protein_coding	2697.64	-0.365974	0.0834534	-4.38536	1.15792e-05	0.000291447
LMF1	ENSG00000103227.14	protein_coding	421.752	0.474755	0.108409	4.3793	1.19063e-05	0.000299114
MCM4	ENSG00000104738.12	protein_coding	3932.05	-0.384617	0.0878352	-4.37885	1.19305e-05	0.00029916
ORC6	ENSG00000091651.4	protein_coding	568.001	-0.475928	0.108713	-4.37784	1.19859e-05	0.000299984
BLM	ENSG00000197299.6	protein_coding	314.811	-0.500681	0.114472	-4.37384	1.22081e-05	0.000304975
CA12	ENSG00000074410.9	protein_coding	11577.3	0.318498	0.0728362	4.3728	1.22665e-05	0.000305861
HAS3	ENSG00000103044.6	protein_coding	726.127	0.468761	0.107408	4.3643	1.27531e-05	0.00031732
TCF19	ENSG00000137310.7	protein_coding	328.636	-0.527169	0.120801	-4.36395	1.27737e-05	0.00031732
CCNE2	ENSG00000175305.12	protein_coding	324.223	-0.502014	0.11518	-4.35853	1.3094e-05	0.000324071
MBP	ENSG00000197971.10	protein_coding	7321.75	-0.308447	0.0707642	-4.3588	1.30777e-05	0.000324071
CMTM3	ENSG00000140931.15	protein_coding	2152.29	0.384728	0.0882817	4.35796	1.31282e-05	0.000324314
CCL26	ENSG00000006606.4	protein_coding	243.17	0.592235	0.135981	4.35526	1.32907e-05	0.000327722
TMEM154	ENSG00000170006.7	protein_coding	2669.13	-0.355119	0.0815755	-4.35325	1.34131e-05	0.000330131
WEE1	ENSG00000166483.6	protein_coding	2049.06	-0.334852	0.0771562	-4.33992	1.42537e-05	0.000350174
MAP3K12	ENSG00000139625.8	protein_coding	1657.38	0.411027	0.0947255	4.33914	1.43044e-05	0.000350773
DBF4	ENSG00000006634.3	protein_coding	746.452	-0.438082	0.100973	-4.33861	1.43385e-05	0.00035084
ADORA2B	ENSG00000170425.3	protein_coding	3226.19	-0.359895	0.0829578	-4.33829	1.43597e-05	0.00035084
VEGFA	ENSG00000112715.16	protein_coding	69376.5	0.383753	0.0884909	4.33664	1.4468e-05	0.000352839
BMP2K	ENSG00000138756.13	protein_coding	969.904	-0.385117	0.0888298	-4.33545	1.45465e-05	0.000354107
PDE7B	ENSG00000171408.9	protein_coding	549.529	-0.43537	0.100598	-4.32782	1.50595e-05	0.000365927
EFNB3	ENSG00000108947.4	protein_coding	207.923	0.561744	0.130067	4.31889	1.56819e-05	0.000380357
DNAJB6	ENSG00000105993.10	protein_coding	16745.5	-0.276635	0.064181	-4.31023	1.63085e-05	0.000394838
ADCY10P1	ENSG00000161912.13	pseudogene	1638.17	0.383447	0.0890499	4.30597	1.66253e-05	0.000401777
THUMPD1	ENSG00000066654.8	protein_coding	1598.25	0.337556	0.0784251	4.30418	1.67604e-05	0.000404312
SLC25A3	ENSG00000075415.8	protein_coding	31464.2	-0.298948	0.0694954	-4.3017	1.6949e-05	0.000408121
HPS6	ENSG00000166189.6	protein_coding	1646.23	0.433795	0.100984	4.29569	1.74152e-05	0.000418594
HIST2H2BE	ENSG00000184678.8	protein_coding	759.994	0.410691	0.0957173	4.29067	1.78135e-05	0.000427395
EPB41L2	ENSG00000079819.12	protein_coding	5788.17	-0.310599	0.0724221	-4.28873	1.79696e-05	0.000430367
CDT1	ENSG00000167513.4	protein_coding	680.255	-0.469936	0.109733	-4.28253	1.84783e-05	0.000441757
RNASEH2A	ENSG00000104889.4	protein_coding	3091.36	-0.44017	0.102819	-4.28101	1.86048e-05	0.000443985
GALNS	ENSG00000141012.8	protein_coding	1934.57	0.350715	0.0819991	4.27706	1.89381e-05	0.000451132
COL4A2	ENSG00000134871.13	protein_coding	9650.05	-0.305404	0.0714427	-4.27481	1.91299e-05	0.00045489
IL27RA	ENSG00000104998.2	protein_coding	1429.02	0.350151	0.08193	4.27378	1.92187e-05	0.000456091
CDKN2C	ENSG00000123080.6	protein_coding	1874.98	-0.416734	0.0975175	-4.27343	1.92488e-05	0.000456091
TICRR	ENSG00000140534.9	protein_coding	723.288	-0.440269	0.103036	-4.27298	1.92877e-05	0.000456202
PKP3	ENSG00000184363.5	protein_coding	1681.81	0.38883	0.0910352	4.27121	1.94419e-05	0.000459035
MTHFD2	ENSG00000065911.7	protein_coding	1064.95	-0.369681	0.0865712	-4.27026	1.95246e-05	0.000460174
TGFBR2	ENSG00000163513.13	protein_coding	42154.3	-0.297274	0.0696571	-4.26767	1.97524e-05	0.000464722
DNMT1	ENSG00000130816.10	protein_coding	9099.22	0.328291	0.0771591	4.25473	2.09302e-05	0.000491566
PACS2	ENSG00000179364.9	protein_coding	5110.5	0.30206	0.0710155	4.25343	2.10518e-05	0.000493551
KIF22	ENSG00000079616.8	protein_coding	2886.32	-0.404551	0.0951899	-4.24993	2.13836e-05	0.000500451
C5orf34	ENSG00000172244.4	protein_coding	127.476	-0.631308	0.148581	-4.24893	2.14797e-05	0.000501821
CYP2E1	ENSG00000130649.5	protein_coding	197.221	0.584549	0.137606	4.248	2.15688e-05	0.000503021
NR4A3	ENSG00000119508.13	protein_coding	162.272	0.606438	0.142841	4.24554	2.18064e-05	0.000507675
CHST15	ENSG00000182022.13	protein_coding	15211.2	0.316778	0.074623	4.24504	2.18556e-05	0.000507933
NFYA	ENSG00000001167.10	protein_coding	6567.07	0.337887	0.0796656	4.24132	2.2221e-05	0.000515526
CITED1	ENSG00000125931.6	protein_coding	313.408	0.537712	0.126793	4.24087	2.22658e-05	0.00051567
PPM1A	ENSG00000100614.13	protein_coding	3317.85	0.387447	0.0913808	4.23992	2.236e-05	0.000516955
ID3	ENSG00000117318.8	protein_coding	97.8089	0.691162	0.163099	4.23769	2.25833e-05	0.000521214
IARS	ENSG00000196305.13	protein_coding	11021.1	-0.328203	0.0774569	-4.23723	2.26293e-05	0.000521374
POLA1	ENSG00000101868.6	protein_coding	881.409	-0.426102	0.100634	-4.23417	2.29394e-05	0.000527606
CNTNAP1	ENSG00000108797.7	protein_coding	3884.17	0.364957	0.0862049	4.2336	2.29984e-05	0.000528052
FBXO5	ENSG00000112029.5	protein_coding	968.642	-0.434456	0.102641	-4.23276	2.30841e-05	0.000529109
NT5E	ENSG00000135318.7	protein_coding	43872.4	-0.29251	0.0691195	-4.23195	2.31676e-05	0.000529649
CTPS1	ENSG00000171793.9	protein_coding	2283.58	-0.413546	0.0977244	-4.23176	2.3187e-05	0.000529649
EBP	ENSG00000147155.6	protein_coding	2320.43	-0.355381	0.0840763	-4.22689	2.36948e-05	0.000540322
TIMP3	ENSG00000100234.11	protein_coding	43192.2	0.315246	0.0746228	4.22453	2.3944e-05	0.000545025
CORO2A	ENSG00000106789.8	protein_coding	1178.44	0.369846	0.0875628	4.22378	2.40236e-05	0.000545025
LIPH	ENSG00000163898.5	protein_coding	1605.67	-0.365337	0.0864945	-4.22382	2.40198e-05	0.000545025
SOX2	ENSG00000181449.2	protein_coding	209.401	0.595722	0.141064	4.22305	2.41019e-05	0.000545873
DSCC1	ENSG00000136982.5	protein_coding	333.688	-0.522323	0.123704	-4.22235	2.4177e-05	0.000546647
KIFC3	ENSG00000140859.11	protein_coding	7862.84	-0.333364	0.078972	-4.2213	2.429e-05	0.000548272
PRTFDC1	ENSG00000099256.14	protein_coding	453.605	-0.470759	0.111543	-4.22041	2.4386e-05	0.000548987
MEX3D	ENSG00000181588.15	protein_coding	1722.16	0.378264	0.0896309	4.22024	2.4404e-05	0.000548987
PRKAG2	ENSG00000106617.9	protein_coding	1115.38	-0.356712	0.0845471	-4.2191	2.45283e-05	0.000550855
SH3PXD2A	ENSG00000107957.12	protein_coding	7868.14	0.379069	0.0899127	4.21597	2.48706e-05	0.000557603
PBX3	ENSG00000167081.12	protein_coding	774.012	-0.39735	0.0942842	-4.21439	2.50459e-05	0.000559653
UCKL1	ENSG00000198276.9	protein_coding	4311.11	0.351844	0.0834811	4.21466	2.50155e-05	0.000559653
CKAP5	ENSG00000175216.10	protein_coding	12797.3	-0.335274	0.0795782	-4.21314	2.51846e-05	0.000561811
ZNHIT6	ENSG00000117174.6	protein_coding	1442.22	-0.341687	0.0811368	-4.21124	2.53973e-05	0.000565609
UQCRFS1	ENSG00000169021.4	protein_coding	4403.95	-0.333688	0.0792811	-4.20892	2.56593e-05	0.000570492
EXOSC9	ENSG00000123737.8	protein_coding	1828.05	-0.404358	0.0960959	-4.20786	2.57805e-05	0.000572232
ULK1	ENSG00000177169.5	protein_coding	3151.07	0.316454	0.0752846	4.20344	2.62891e-05	0.000582552
NEK7	ENSG00000151414.10	protein_coding	3252.13	0.401392	0.0955798	4.19954	2.67453e-05	0.000591679
XKRX	ENSG00000182489.7	protein_coding	219.046	0.584188	0.139161	4.19791	2.69384e-05	0.000594965
ASAP3	ENSG00000088280.14	protein_coding	2309	0.355345	0.0847589	4.19242	2.7599e-05	0.000608546
MCM7	ENSG00000166508.13	protein_coding	9136.98	-0.37176	0.0887005	-4.19118	2.77506e-05	0.00061088
GALNT6	ENSG00000139629.11	protein_coding	2293.04	-0.342031	0.0816487	-4.18906	2.80116e-05	0.00061561
CCDC69	ENSG00000198624.8	protein_coding	6297.75	0.30298	0.07241	4.18422	2.86141e-05	0.000627816
ANXA1	ENSG00000135046.9	protein_coding	29359.6	-0.295591	0.0706914	-4.18143	2.89685e-05	0.000633507
SLC45A1	ENSG00000162426.10	protein_coding	262.042	0.510596	0.122108	4.18152	2.89564e-05	0.000633507
SH3PXD2B	ENSG00000174705.7	protein_coding	2381.6	0.376201	0.0899796	4.18096	2.90283e-05	0.000633776
MXRA8	ENSG00000162576.12	protein_coding	4423.48	0.396865	0.0949329	4.18048	2.90892e-05	0.000634069
MTMR9LP	ENSG00000220785.3	pseudogene	616.985	0.431436	0.103254	4.1784	2.93572e-05	0.000638867
LIG1	ENSG00000105486.9	protein_coding	2488.8	-0.385481	0.0922818	-4.17722	2.95093e-05	0.000641131
PLK2	ENSG00000145632.10	protein_coding	10062.6	-0.361768	0.0866244	-4.17628	2.96309e-05	0.000642726
RHBDD1	ENSG00000144468.12	protein_coding	1096.59	0.379389	0.0908525	4.17587	2.96847e-05	0.000642847
IPO11	ENSG00000086200.12	protein_coding	1394.71	0.352441	0.0845384	4.16901	3.05927e-05	0.000661436
MFAP2	ENSG00000117122.9	protein_coding	3087.43	0.393229	0.0943422	4.16811	3.0713e-05	0.000662964
DISC1	ENSG00000162946.16	protein_coding	353.36	0.551873	0.132492	4.16535	3.10881e-05	0.000669976
CASC3	ENSG00000108349.10	protein_coding	5920.5	0.310872	0.0746757	4.16296	3.14143e-05	0.000675913
RANBP1	ENSG00000099901.12	protein_coding	2422.52	-0.384123	0.0923102	-4.16122	3.16549e-05	0.000679915
LRP1	ENSG00000123384.9	protein_coding	26936.1	0.389593	0.0936323	4.16088	3.17022e-05	0.000679915
HDHD1	ENSG00000130021.9	protein_coding	712.497	-0.446046	0.107289	-4.15744	3.21835e-05	0.000689131
SUV39H1	ENSG00000101945.12	protein_coding	440.396	-0.500502	0.120424	-4.15615	3.23652e-05	0.00069191
TMC5	ENSG00000103534.12	protein_coding	389.798	-0.45952	0.11058	-4.15553	3.24536e-05	0.00069269
SMC1A	ENSG00000072501.13	protein_coding	7868.64	-0.35179	0.0846726	-4.15471	3.25696e-05	0.000694055
PAQR8	ENSG00000170915.8	protein_coding	667.027	0.415975	0.100132	4.15426	3.26336e-05	0.00069431
SURF4	ENSG00000148248.9	protein_coding	16591.1	0.288099	0.0694282	4.1496	3.3306e-05	0.000707487
SNRPD1	ENSG00000167088.6	protein_coding	2974.43	-0.391767	0.0944757	-4.14675	3.37226e-05	0.000715197
FH	ENSG00000091483.6	protein_coding	3181.17	-0.354212	0.0854425	-4.14562	3.3889e-05	0.000717587
FBXO32	ENSG00000156804.3	protein_coding	4804.3	0.321304	0.0775154	4.14503	3.39765e-05	0.000718299
TEAD2	ENSG00000074219.9	protein_coding	3490.19	0.322236	0.0777511	4.14446	3.4062e-05	0.000718968
PTPDC1	ENSG00000158079.10	protein_coding	998.905	-0.366497	0.0884513	-4.14349	3.42055e-05	0.000720855
WLS	ENSG00000116729.9	protein_coding	9376.76	0.285222	0.0688628	4.14189	3.44463e-05	0.000724784
LY6E	ENSG00000160932.6	protein_coding	9603.73	0.423512	0.10243	4.13465	3.55496e-05	0.000746822
EOGT	ENSG00000163378.9	protein_coding	964.136	-0.406277	0.0983424	-4.13125	3.608e-05	0.000756772
TMX1	ENSG00000139921.8	protein_coding	3855.06	-0.295632	0.0715664	-4.13087	3.6139e-05	0.00075682
NCAPD3	ENSG00000151503.8	protein_coding	2935.49	-0.388509	0.0940958	-4.12886	3.64561e-05	0.000761296
IER5L	ENSG00000188483.6	protein_coding	1220.79	0.505444	0.122419	4.1288	3.64669e-05	0.000761296
SHC1	ENSG00000160691.14	protein_coding	8965.07	0.2747	0.0665806	4.12583	3.69401e-05	0.00076997
ACLY	ENSG00000131473.12	protein_coding	27952.2	-0.304565	0.073894	-4.12165	3.76172e-05	0.000782859
UST	ENSG00000111962.7	protein_coding	779.827	0.391256	0.0949918	4.11884	3.8078e-05	0.000791215
NINL	ENSG00000101004.10	protein_coding	1185.57	0.370655	0.090022	4.11739	3.83196e-05	0.000794997
POLE3	ENSG00000148229.8	protein_coding	3838.98	-0.322744	0.0785563	-4.10844	3.9834e-05	0.000825133
ISM1	ENSG00000101230.5	protein_coding	455.784	0.45461	0.110674	4.10765	3.99709e-05	0.000826685
FAM171B	ENSG00000144369.8	protein_coding	286.171	0.513631	0.125057	4.10719	4.00507e-05	0.00082698
SIPA1	ENSG00000213445.4	protein_coding	3087.22	0.371387	0.0904311	4.10685	4.01092e-05	0.00082698
RP4-758J24.5	ENSG00000272091.1	lincRNA	178.588	0.600373	0.146209	4.10626	4.02109e-05	0.000827798
OBSCN	ENSG00000154358.15	protein_coding	1035.33	0.470999	0.11475	4.10458	4.05052e-05	0.000832573
SEC63	ENSG00000025796.9	protein_coding	5481.04	0.37621	0.0917816	4.09897	4.14985e-05	0.000851677
NUP107	ENSG00000111581.5	protein_coding	2360.84	-0.363799	0.0888383	-4.09507	4.22047e-05	0.00086484
LYAR	ENSG00000145220.9	protein_coding	1722.45	-0.342396	0.0836477	-4.09331	4.25265e-05	0.000870098
CAPN5	ENSG00000149260.10	protein_coding	1317.49	0.354898	0.0867316	4.09191	4.2783e-05	0.000874005
POLE2	ENSG00000100479.8	protein_coding	562.846	-0.491557	0.120225	-4.08865	4.33884e-05	0.000885016
CCDC34	ENSG00000109881.12	protein_coding	679.704	-0.406057	0.0993339	-4.0878	4.35491e-05	0.00088694
PSMD10	ENSG00000101843.14	protein_coding	2736.5	-0.333696	0.0817848	-4.08017	4.50027e-05	0.000915147
EBF4	ENSG00000088881.16	protein_coding	900.25	0.360191	0.0884632	4.07164	4.66828e-05	0.000947867
SVIP	ENSG00000198168.4	protein_coding	1029.27	-0.394576	0.0969279	-4.07082	4.68471e-05	0.000949757
CXCL10	ENSG00000169245.4	protein_coding	434.223	0.437157	0.107543	4.06494	4.80457e-05	0.000972578
FOXO3	ENSG00000118689.10	protein_coding	2463.55	0.399133	0.0982046	4.0643	4.81778e-05	0.000973776
TAF5	ENSG00000148835.9	protein_coding	576.787	-0.422871	0.104204	-4.05811	4.94713e-05	0.000998407
MAP3K15	ENSG00000180815.10	protein_coding	314.14	0.52013	0.1282	4.05716	4.96721e-05	0.00100095
ILF2	ENSG00000143621.12	protein_coding	12254.6	-0.320858	0.0790944	-4.05665	4.97816e-05	0.00100164
ZNF467	ENSG00000181444.8	protein_coding	490.556	0.461293	0.113867	4.05116	5.09651e-05	0.00102391
STMN1	ENSG00000117632.16	protein_coding	28265.3	-0.310337	0.0766296	-4.04983	5.12545e-05	0.00102663
DNER	ENSG00000187957.7	protein_coding	1045.51	-0.355814	0.0878527	-4.05012	5.11921e-05	0.00102663
KCNAB3	ENSG00000170049.5	protein_coding	81.5445	-0.648752	0.160696	-4.03713	5.41088e-05	0.00107894
EFEMP2	ENSG00000172638.8	protein_coding	670.728	0.480325	0.118959	4.03773	5.39699e-05	0.00107894
STARD4-AS1	ENSG00000246859.2	antisense	276.101	0.537936	0.133247	4.03715	5.41049e-05	0.00107894
PLBD1	ENSG00000121316.6	protein_coding	396.7	0.46276	0.11472	4.03383	5.48757e-05	0.0010926
PLEKHG2	ENSG00000090924.10	protein_coding	3218	0.30951	0.0768548	4.0272	5.64446e-05	0.00112216
GMNN	ENSG00000112312.5	protein_coding	2088.96	-0.434782	0.108144	-4.02039	5.81024e-05	0.0011534
CENPK	ENSG00000123219.8	protein_coding	420.198	-0.466339	0.116009	-4.01983	5.82391e-05	0.0011544
ARL10	ENSG00000175414.6	protein_coding	539.975	0.536134	0.133471	4.01685	5.89805e-05	0.00116563
GSG2	ENSG00000177602.4	protein_coding	363.411	-0.496699	0.12365	-4.01696	5.89534e-05	0.00116563
CYCS	ENSG00000172115.4	protein_coding	3305.06	-0.314163	0.0782216	-4.01632	5.91129e-05	0.00116652
FHOD1	ENSG00000135723.9	protein_coding	3011.99	0.294949	0.0735157	4.01205	6.01941e-05	0.0011861
PLCD4	ENSG00000115556.9	protein_coding	452.324	0.446514	0.111312	4.01137	6.03668e-05	0.00118775
LAMB2	ENSG00000172037.9	protein_coding	46847.3	0.271624	0.0677308	4.01035	6.06299e-05	0.00119117
HIP1	ENSG00000127946.12	protein_coding	648.593	0.468904	0.116975	4.00859	6.10828e-05	0.0011983
CUL7	ENSG00000044090.4	protein_coding	11540.2	0.283736	0.0708159	4.00666	6.15825e-05	0.00120633
FAM211B	ENSG00000178026.8	protein_coding	458.964	0.426011	0.106344	4.00596	6.17663e-05	0.00120816
ANP32B	ENSG00000136938.8	protein_coding	7446.08	-0.281077	0.0702262	-4.00245	6.26899e-05	0.00122443
IFIT3	ENSG00000119917.9	protein_coding	5904.58	-0.289439	0.0723589	-4.00005	6.33289e-05	0.0012351
CRTC1	ENSG00000105662.11	protein_coding	3446.56	0.288157	0.0720848	3.99747	6.40241e-05	0.00124541
GINS4	ENSG00000147536.7	protein_coding	987.721	-0.348524	0.0871878	-3.99739	6.40444e-05	0.00124541
PCDH7	ENSG00000169851.11	protein_coding	774.869	0.374249	0.0936581	3.99591	6.44464e-05	0.0012514
SLC41A3	ENSG00000114544.11	protein_coding	2390.16	0.317098	0.0793951	3.99392	6.49891e-05	0.00125838
THAP8	ENSG00000161277.9	protein_coding	475.207	0.443936	0.111153	3.9939	6.49941e-05	0.00125838
DEK	ENSG00000124795.10	protein_coding	10739	-0.27278	0.0683239	-3.99245	6.53953e-05	0.00126431
DHFR	ENSG00000228716.2	protein_coding	2813.4	-0.318899	0.0799214	-3.99015	6.60308e-05	0.00127475
SAE1	ENSG00000142230.7	protein_coding	7813.42	-0.338242	0.084784	-3.98946	6.62242e-05	0.00127525
SERPINA1	ENSG00000197249.8	protein_coding	1649.16	-0.345847	0.0866921	-3.98937	6.62478e-05	0.00127525
RING1	ENSG00000204227.4	protein_coding	2316.63	0.357038	0.0895587	3.98663	6.7017e-05	0.00128819
SNX27	ENSG00000143376.8	protein_coding	1818.72	0.367533	0.0922406	3.9845	6.76213e-05	0.00129794
CSAD	ENSG00000139631.14	protein_coding	729.137	0.381453	0.0957987	3.98182	6.83904e-05	0.00131082
ETNK2	ENSG00000143845.10	protein_coding	689.091	0.381152	0.0958072	3.97833	6.94016e-05	0.00132829
ICOSLG	ENSG00000160223.12	protein_coding	2958.38	0.306581	0.0771688	3.97286	7.10134e-05	0.00135719
C2orf69	ENSG00000178074.5	protein_coding	508.736	-0.412432	0.103824	-3.9724	7.11525e-05	0.0013579
CPT1C	ENSG00000169169.10	protein_coding	1189.01	0.346512	0.087256	3.97121	7.15082e-05	0.0013626
SH3D21	ENSG00000214193.5	protein_coding	1225.88	0.385964	0.0971982	3.9709	7.16029e-05	0.0013626
USP38	ENSG00000170185.5	protein_coding	1775.72	0.361137	0.0912025	3.95973	7.50347e-05	0.00142587
CEP135	ENSG00000174799.6	protein_coding	1074.79	-0.359002	0.0907389	-3.95642	7.60798e-05	0.00144368
ATF2	ENSG00000115966.12	protein_coding	1883.74	0.3521	0.0890304	3.95483	7.65889e-05	0.00144921
SLC7A1	ENSG00000139514.8	protein_coding	6082.23	-0.304894	0.0770901	-3.95503	7.65249e-05	0.00144921
SRPX2	ENSG00000102359.5	protein_coding	963.128	0.355434	0.0899199	3.95278	7.72469e-05	0.00145959
ST3GAL5	ENSG00000115525.12	protein_coding	2864.68	0.353112	0.0894276	3.94859	7.86142e-05	0.00148333
EPHB2	ENSG00000133216.12	protein_coding	2629.56	0.324347	0.0822847	3.94177	8.08839e-05	0.001524
LINC00669	ENSG00000267374.1	lincRNA	85.3185	-0.635276	0.161217	-3.94049	8.13142e-05	0.00152994
RP5-857K21.11	ENSG00000198744.5	pseudogene	12056.2	-0.347426	0.0882111	-3.93857	8.19688e-05	0.00154009
COL4A5	ENSG00000188153.8	protein_coding	2843.48	0.303154	0.0770742	3.93328	8.37957e-05	0.0015722
SLC35D1	ENSG00000116704.6	protein_coding	1238.89	0.33925	0.0863641	3.92814	8.5605e-05	0.00160389
ENC1	ENSG00000171617.9	protein_coding	6929.98	-0.29441	0.0749784	-3.92659	8.6158e-05	0.00161199
MFSD8	ENSG00000164073.5	protein_coding	787.077	-0.37862	0.0964464	-3.92571	8.64752e-05	0.00161566
PID1	ENSG00000153823.14	protein_coding	713.232	-0.371318	0.0946152	-3.92451	8.69075e-05	0.00162146
HBEGF	ENSG00000113070.6	protein_coding	2008.9	-0.327049	0.0834541	-3.91891	8.89492e-05	0.00165724
ADK	ENSG00000156110.9	protein_coding	2875.03	-0.324719	0.0828763	-3.91811	8.92443e-05	0.00166042
EIF2S2	ENSG00000125977.6	protein_coding	11677.6	-0.268451	0.0685295	-3.91731	8.9542e-05	0.00166364
IGDCC4	ENSG00000103742.7	protein_coding	1112.59	0.359079	0.0916879	3.91632	8.99126e-05	0.0016682
DDI2	ENSG00000197312.7	protein_coding	1776.37	-0.350074	0.0894092	-3.91541	9.02496e-05	0.00167212
SLC35G1	ENSG00000176273.10	protein_coding	152.948	-0.552757	0.141288	-3.91226	9.14373e-05	0.00169178
ITPR3	ENSG00000096433.6	protein_coding	33343.1	0.30383	0.0777984	3.90535	9.40882e-05	0.00173842
TRMT6	ENSG00000089195.10	protein_coding	2158.22	0.306672	0.0785533	3.904	9.46155e-05	0.00174574
MYL12B	ENSG00000118680.8	protein_coding	20267.7	-0.276495	0.0709304	-3.89811	9.69448e-05	0.00178625
ABTB1	ENSG00000114626.13	protein_coding	2509.62	0.389511	0.0999596	3.89668	9.75207e-05	0.00179438
WHSC1	ENSG00000109685.13	protein_coding	11326.5	-0.30973	0.079561	-3.89299	9.90158e-05	0.00181938
SGTA	ENSG00000104969.5	protein_coding	3788.79	0.299098	0.076841	3.89244	9.92428e-05	0.00182104
KIAA1199	ENSG00000103888.11	protein_coding	1997.11	0.349212	0.0897541	3.89077	9.99278e-05	0.00182608
BET1	ENSG00000105829.7	protein_coding	740.514	0.39563	0.10167	3.8913	9.97075e-05	0.00182608
PPP1R9A	ENSG00000158528.7	protein_coding	792.183	0.396708	0.101954	3.89105	9.98105e-05	0.00182608
IZUMO4	ENSG00000099840.9	protein_coding	806.709	0.508458	0.130755	3.88863	0.000100814	0.00183473
MT-ND1	ENSG00000198888.2	protein_coding	108857	-0.257353	0.0661796	-3.8887	0.000100782	0.00183473
RP11-554I8.2	ENSG00000223784.1	lincRNA	175.81	-0.57362	0.147504	-3.88885	0.000100721	0.00183473
LPXN	ENSG00000110031.8	protein_coding	1742.09	-0.316259	0.0813821	-3.8861	0.000101866	0.00185135
LRRCC1	ENSG00000133739.11	protein_coding	439.904	-0.450242	0.115886	-3.88521	0.000102243	0.00185568
ATP1B3	ENSG00000069849.6	protein_coding	4198.64	-0.29611	0.0762268	-3.8846	0.000102501	0.00185782
ACTL6A	ENSG00000136518.12	protein_coding	4198.02	-0.337319	0.0868581	-3.88357	0.000102935	0.00186078
CALHM2	ENSG00000138172.6	protein_coding	1241.58	0.334051	0.0860169	3.88355	0.000102943	0.00186078
NDUFA5	ENSG00000128609.10	protein_coding	1303.14	0.387233	0.0997198	3.88321	0.000103085	0.00186084
GPR37	ENSG00000170775.2	protein_coding	316.943	0.451974	0.116469	3.88065	0.000104179	0.00187804
ORAI2	ENSG00000160991.11	protein_coding	2441.1	0.301532	0.0777238	3.87953	0.00010466	0.00188416
NAB2	ENSG00000166886.8	protein_coding	2112.32	0.339504	0.0875668	3.87709	0.000105714	0.00190058
FLJ27365	ENSG00000197182.8	protein_coding	214.917	0.505649	0.130449	3.87623	0.000106088	0.00190474
AMD1	ENSG00000123505.10	protein_coding	3628.86	-0.308031	0.0794832	-3.87542	0.000106441	0.00190851
MANBA	ENSG00000109323.4	protein_coding	1315.33	0.364839	0.0942299	3.8718	0.000108036	0.00193449
SLC29A4	ENSG00000164638.6	protein_coding	269.109	0.516394	0.1334	3.87102	0.00010838	0.00193805
ACBD7	ENSG00000176244.6	protein_coding	112.752	-0.585935	0.151395	-3.87025	0.000108725	0.00194162
TGFB2	ENSG00000092969.7	protein_coding	2722.44	0.404868	0.104662	3.86833	0.000109582	0.0019543
IGSF3	ENSG00000143061.13	protein_coding	2381.13	0.33586	0.0868661	3.86641	0.00011045	0.00196716
PAPPA2	ENSG00000116183.6	protein_coding	137.828	-0.566266	0.146512	-3.86497	0.000111102	0.0019735
BCL2A1	ENSG00000140379.7	protein_coding	148.636	-0.588762	0.152322	-3.86523	0.000110983	0.0019735
SGSH	ENSG00000181523.8	protein_coding	2381.34	0.308463	0.0799125	3.86001	0.000113381	0.0020113
VPS36	ENSG00000136100.8	protein_coding	1601.9	-0.3074	0.07967	-3.85841	0.000114126	0.00201915
SPC25	ENSG00000152253.4	protein_coding	414.103	-0.44276	0.114748	-3.85854	0.000114066	0.00201915
PLK3	ENSG00000173846.8	protein_coding	1911.95	0.322126	0.0835087	3.8574	0.000114599	0.00202484
MAPK8IP1	ENSG00000121653.7	protein_coding	719.708	0.376807	0.097705	3.85658	0.000114984	0.00202895
MAP2K3	ENSG00000034152.14	protein_coding	2548.38	-0.290802	0.075421	-3.85572	0.000115391	0.00203179
MZT1	ENSG00000204899.5	protein_coding	715.743	-0.372215	0.0965391	-3.85559	0.000115449	0.00203179
PHGDH	ENSG00000092621.7	protein_coding	983.314	-0.414147	0.10753	-3.85146	0.000117416	0.00206367
FAM72B	ENSG00000188610.8	protein_coding	173.237	-0.562026	0.145962	-3.85049	0.000117883	0.00206915
ENPP2	ENSG00000136960.8	protein_coding	104.063	0.577797	0.150086	3.84978	0.000118225	0.00207243
LRRC59	ENSG00000108829.9	protein_coding	10990.2	-0.253848	0.0660244	-3.84476	0.000120669	0.00210973
HSPA8	ENSG00000109971.9	protein_coding	107697	-0.272876	0.0709722	-3.84483	0.000120634	0.00210973
BHLHE41	ENSG00000123095.5	protein_coding	899.703	0.357075	0.0929702	3.84074	0.000122662	0.00214014
UCN2	ENSG00000145040.3	protein_coding	708.12	0.458215	0.119308	3.84061	0.000122729	0.00214014
RNF26	ENSG00000173456.4	protein_coding	3066.72	-0.303182	0.078969	-3.83925	0.000123409	0.00214919
ANKH	ENSG00000154122.8	protein_coding	7064.59	0.306511	0.0798587	3.83816	0.000123958	0.00215593
PROX1	ENSG00000117707.11	protein_coding	471.437	0.457297	0.119197	3.83647	0.000124815	0.00216801
HELZ2	ENSG00000130589.12	protein_coding	6679.63	0.277373	0.0723089	3.83594	0.000125086	0.00216989
ISOC1	ENSG00000066583.7	protein_coding	800.556	-0.398827	0.104034	-3.83362	0.00012627	0.00218759
NELFB	ENSG00000188986.4	protein_coding	5593.54	0.305424	0.0796897	3.83266	0.000126764	0.00219329
CA9	ENSG00000107159.8	protein_coding	848.462	0.450964	0.117876	3.82573	0.000130385	0.00225302
C4orf47	ENSG00000205129.4	protein_coding	262.513	0.469535	0.12277	3.82451	0.000131035	0.00226132
DSN1	ENSG00000149636.11	protein_coding	1454.25	-0.349907	0.0915005	-3.8241	0.00013125	0.00226211
MAPRE2	ENSG00000166974.8	protein_coding	1649.78	-0.315368	0.0824763	-3.82374	0.000131444	0.00226253
POM121	ENSG00000196313.7	protein_coding	2273.88	0.342872	0.0897378	3.82082	0.000133011	0.00228655
ZCRB1	ENSG00000139168.3	protein_coding	1411.99	-0.345937	0.0906569	-3.81589	0.000135694	0.00232967
CASK	ENSG00000147044.16	protein_coding	3641.95	0.332928	0.0873057	3.81336	0.000137091	0.00235064
LRP8	ENSG00000157193.10	protein_coding	1973.84	-0.310291	0.0813887	-3.81246	0.000137591	0.00235618
RP11-30P6.6	ENSG00000234155.1	lincRNA	82.6912	-0.592615	0.155578	-3.80913	0.000139459	0.0023851
SHISA3	ENSG00000178343.4	protein_coding	119.346	-0.564791	0.148334	-3.80756	0.000140346	0.00239721
CSTF2	ENSG00000101811.9	protein_coding	1564.23	-0.360168	0.0948032	-3.79911	0.000145215	0.0024772
PKP2	ENSG00000057294.9	protein_coding	1830.46	-0.303646	0.0800833	-3.79162	0.000149665	0.00254984
CDK6	ENSG00000105810.5	protein_coding	3338.21	-0.280457	0.0740453	-3.78765	0.000152081	0.0025877
PIK3CD	ENSG00000171608.11	protein_coding	2030.95	0.326544	0.0862429	3.78633	0.000152886	0.00259809
HN1L	ENSG00000206053.8	protein_coding	6025.04	-0.259256	0.0684839	-3.78565	0.00015331	0.00260197
FNIP2	ENSG00000052795.8	protein_coding	1456.42	-0.304762	0.080515	-3.78515	0.000153613	0.00260381
IL11	ENSG00000095752.2	protein_coding	1422.8	0.411169	0.108689	3.78298	0.00015496	0.00262332
GINS2	ENSG00000131153.4	protein_coding	310.804	-0.470165	0.124437	-3.77833	0.000157884	0.00266943
SLITRK5	ENSG00000165300.6	protein_coding	189.416	0.536114	0.141968	3.77631	0.000159169	0.00268774
MAGED2	ENSG00000102316.12	protein_coding	20847.8	0.248661	0.0658627	3.77545	0.000159721	0.00269365
SERPINB4	ENSG00000206073.6	protein_coding	423.756	-0.412404	0.109365	-3.77088	0.000162672	0.00273995
WDR76	ENSG00000092470.7	protein_coding	451.117	-0.397645	0.105473	-3.77011	0.000163174	0.00274494
OPLAH	ENSG00000178814.11	protein_coding	1101.31	0.344889	0.0915007	3.76925	0.000163742	0.00275102
ACPL2	ENSG00000155893.7	protein_coding	561.658	0.394745	0.104904	3.76292	0.000167939	0.00281586
PRIM1	ENSG00000198056.9	protein_coding	276.663	-0.515749	0.137065	-3.7628	0.000168023	0.00281586
DUSP8	ENSG00000184545.6	protein_coding	126.07	0.543527	0.144535	3.76053	0.000169555	0.00283797
PPL	ENSG00000118898.11	protein_coding	823.625	0.366213	0.0974022	3.75981	0.000170045	0.00284261
CHAF1B	ENSG00000159259.7	protein_coding	418.051	-0.426339	0.113494	-3.75649	0.000172313	0.00287337
SOWAHC	ENSG00000198142.3	protein_coding	975.721	-0.362157	0.0964084	-3.75649	0.000172316	0.00287337
CROCC	ENSG00000058453.12	protein_coding	1229.28	0.338487	0.0901606	3.75427	0.000173849	0.00289532
KIF18A	ENSG00000121621.6	protein_coding	1023.78	-0.3555	0.0947078	-3.75365	0.000174276	0.00289881
HDAC5	ENSG00000108840.11	protein_coding	4466.71	0.26817	0.0715425	3.7484	0.000177964	0.00295646
SPCS2	ENSG00000118363.7	protein_coding	2812.11	0.286108	0.0763529	3.74718	0.000178831	0.00296717
LINC00152	ENSG00000222041.6	lincRNA	1828.37	-0.380889	0.101695	-3.7454	0.000180106	0.00298461
EVA1A	ENSG00000115363.9	protein_coding	1211.35	0.312796	0.0835538	3.74365	0.000181369	0.00300181
TBC1D2	ENSG00000095383.15	protein_coding	1888.03	-0.319902	0.0854652	-3.74307	0.000181787	0.003005
RPA1	ENSG00000132383.7	protein_coding	7161.8	-0.307391	0.082152	-3.74173	0.000182757	0.0030173
EPOR	ENSG00000187266.9	protein_coding	1646.72	0.36972	0.0988551	3.74001	0.000184009	0.00303422
KIFC2	ENSG00000167702.7	protein_coding	2274.51	0.363152	0.0971793	3.73692	0.000186287	0.00306799
MYOF	ENSG00000138119.12	protein_coding	35426.9	-0.29605	0.0792809	-3.7342	0.000188315	0.00309757
PPDPF	ENSG00000125534.5	protein_coding	3972.55	0.32772	0.0878051	3.73236	0.000189695	0.00311259
TPM3	ENSG00000143549.15	protein_coding	25575.5	-0.278154	0.074525	-3.73236	0.000189695	0.00311259
D2HGDH	ENSG00000180902.12	protein_coding	625.47	0.389468	0.104404	3.73039	0.000191182	0.00313314
DOK3	ENSG00000146094.9	protein_coding	423.612	-0.488875	0.131183	-3.72665	0.000194039	0.00317605
CLCN4	ENSG00000073464.7	protein_coding	742.425	-0.364943	0.0979416	-3.72613	0.000194443	0.00317847
HELLS	ENSG00000119969.10	protein_coding	648.993	-0.421553	0.113151	-3.72557	0.000194871	0.00317847
BRE	ENSG00000158019.16	protein_coding	1324.68	-0.343347	0.0921604	-3.72553	0.000194902	0.00317847
ANXA7	ENSG00000138279.11	protein_coding	6388.96	-0.263349	0.0707368	-3.72294	0.000196915	0.00320475
FAM171A2	ENSG00000161682.10	protein_coding	282.425	0.47639	0.127964	3.72284	0.000196994	0.00320475
HECTD2	ENSG00000165338.12	protein_coding	687.565	0.374979	0.100772	3.72105	0.000198394	0.0032236
RASGRF1	ENSG00000058335.11	protein_coding	241.601	-0.482966	0.129878	-3.71862	0.000200313	0.00325082
IFITM10	ENSG00000244242.1	protein_coding	608.687	0.385897	0.103805	3.71752	0.000201186	0.00326102
ARRDC2	ENSG00000105643.5	protein_coding	5027.16	0.272602	0.0733739	3.71524	0.000203011	0.0032866
GABBR1	ENSG00000204681.6	protein_coding	1332.97	0.373316	0.100519	3.7139	0.000204089	0.00330006
DBF4B	ENSG00000161692.13	protein_coding	886.318	-0.405907	0.10931	-3.71334	0.00020454	0.00330335
AIMP2	ENSG00000106305.5	protein_coding	705.603	-0.353695	0.0953187	-3.71066	0.000206721	0.00333453
KCTD2	ENSG00000180901.6	protein_coding	3144.22	-0.278498	0.0751281	-3.70697	0.00020975	0.00337931
ARRDC4	ENSG00000140450.7	protein_coding	596.416	0.42653	0.115076	3.70652	0.000210127	0.0033813
GARS	ENSG00000106105.9	protein_coding	7287.86	-0.272931	0.0736844	-3.70406	0.000212179	0.00341021
DHTKD1	ENSG00000181192.7	protein_coding	1662.15	0.322248	0.0870135	3.70343	0.000212707	0.00341458
PXK	ENSG00000168297.11	protein_coding	1256.31	0.305127	0.0824626	3.70019	0.000215438	0.00345426
EXD3	ENSG00000187609.11	protein_coding	1023.8	0.338524	0.0914978	3.6998	0.000215766	0.00345536
ZNF436	ENSG00000125945.10	protein_coding	2976.89	0.289288	0.0782025	3.69922	0.000216266	0.00345921
CTNNAL1	ENSG00000119326.10	protein_coding	3926.35	-0.289944	0.0784203	-3.6973	0.000217901	0.00348119
TMEM45A	ENSG00000181458.6	protein_coding	2040.38	0.402139	0.108792	3.69641	0.000218665	0.00348923
PLA2R1	ENSG00000153246.7	protein_coding	323.771	0.444877	0.120404	3.69486	0.000220005	0.00350642
FAM117A	ENSG00000121104.3	protein_coding	219.938	-0.475216	0.12868	-3.69301	0.000221614	0.00352784
PTK7	ENSG00000112655.11	protein_coding	8989.51	0.254037	0.06888	3.68811	0.000225927	0.0035906
HN1	ENSG00000189159.11	protein_coding	6537.52	-0.336612	0.0912742	-3.68792	0.000226095	0.0035906
CCND1	ENSG00000110092.3	protein_coding	21381.8	-0.288303	0.0781819	-3.68759	0.000226388	0.00359098
P4HA2	ENSG00000072682.14	protein_coding	7582.33	0.286319	0.0776869	3.68554	0.000228215	0.00361137
FUT11	ENSG00000196968.6	protein_coding	2948.92	0.29714	0.0806186	3.68575	0.000228031	0.00361137
ST5	ENSG00000166444.13	protein_coding	1744.86	0.316775	0.0860288	3.68219	0.000231235	0.00365482
COL16A1	ENSG00000084636.13	protein_coding	228.737	0.489307	0.132996	3.67911	0.000234046	0.00369052
PTK2B	ENSG00000120899.13	protein_coding	287.417	-0.447385	0.121591	-3.67941	0.000233771	0.00369052
DSC2	ENSG00000134755.10	protein_coding	1402.28	0.320461	0.0872443	3.67314	0.000239586	0.00376636
CASC8	ENSG00000246228.2	antisense	205.243	-0.512336	0.139486	-3.67302	0.000239703	0.00376636
ERVK13-1	ENSG00000260565.2	processed_transcript	516.841	0.391911	0.106698	3.6731	0.00023963	0.00376636
PI3	ENSG00000124102.4	protein_coding	462.974	-0.480423	0.13084	-3.67185	0.000240801	0.00377915
SLC2A4RG	ENSG00000125520.9	protein_coding	4578.03	0.350592	0.0954975	3.67122	0.000241394	0.00378402
FAM126A	ENSG00000122591.7	protein_coding	1398.46	-0.326116	0.0888614	-3.66994	0.000242609	0.0037986
DNAH11	ENSG00000105877.13	protein_coding	1814.76	0.383744	0.10462	3.66799	0.000244465	0.00382317
NUCKS1	ENSG00000069275.12	protein_coding	16469.5	-0.244886	0.0668156	-3.6651	0.000247242	0.00386207
TDG	ENSG00000139372.10	protein_coding	3180.85	-0.294332	0.0803143	-3.66476	0.000247574	0.00386273
USP15	ENSG00000135655.9	protein_coding	1892.2	0.330459	0.0902451	3.6618	0.000250449	0.00390303
ITPR1	ENSG00000150995.13	protein_coding	6499.8	0.386976	0.105723	3.66027	0.000251946	0.00392177
OCEL1	ENSG00000099330.4	protein_coding	2026.87	0.328207	0.0897246	3.65794	0.000254248	0.00395085
ROBO1	ENSG00000169855.15	protein_coding	5168.64	0.333585	0.0912062	3.65748	0.000254702	0.00395085
AMY2B	ENSG00000240038.2	protein_coding	634.058	0.372663	0.101888	3.65757	0.000254618	0.00395085
ZNF90	ENSG00000213988.5	protein_coding	113.948	-0.559118	0.152989	-3.65463	0.000257556	0.00399047
THBS2	ENSG00000186340.10	protein_coding	1559.84	0.328773	0.0900195	3.65224	0.000259965	0.00402312
GEMIN2	ENSG00000092208.12	protein_coding	511.636	-0.389117	0.106691	-3.64714	0.000265172	0.00409421
LINC00886	ENSG00000240875.1	lincRNA	124.281	0.579837	0.15898	3.64723	0.000265087	0.00409421
CLDND1	ENSG00000080822.12	protein_coding	8080.16	0.290958	0.0798006	3.64606	0.00026629	0.00410197
MBD2	ENSG00000134046.7	protein_coding	2491.83	-0.271519	0.0744632	-3.64635	0.000265995	0.00410197
CNNM4	ENSG00000158158.7	protein_coding	869.353	0.331891	0.0910958	3.64331	0.000269149	0.00414123
PDLIM1	ENSG00000107438.4	protein_coding	3984.11	-0.283302	0.0779344	-3.63513	0.00027784	0.00427003
MIS18BP1	ENSG00000129534.9	protein_coding	2996.02	-0.308332	0.0848495	-3.63387	0.000279202	0.00428603
C1orf132	ENSG00000203709.5	processed_transcript	1906.92	0.369611	0.101911	3.62681	0.000286945	0.00439982
CCT5	ENSG00000150753.7	protein_coding	16520.4	-0.289467	0.0799122	-3.62231	0.000291982	0.00447192
PLOD1	ENSG00000083444.12	protein_coding	34326.5	0.287383	0.0794648	3.61648	0.000298634	0.00456856
TGFBR1	ENSG00000106799.8	protein_coding	5956.87	0.323681	0.0895923	3.61283	0.000302878	0.00462478
ZSCAN18	ENSG00000121413.8	protein_coding	3250.65	0.264689	0.073266	3.61272	0.000303003	0.00462478
ITPR2	ENSG00000123104.7	protein_coding	1307.54	-0.319251	0.0883948	-3.61165	0.000304256	0.00463477
PRMT3	ENSG00000185238.8	protein_coding	762.089	-0.351481	0.0973209	-3.61157	0.000304353	0.00463477
RAN	ENSG00000132341.7	protein_coding	15214.9	-0.270054	0.0747943	-3.61063	0.000305456	0.00464523
ZNF37BP	ENSG00000234420.3	pseudogene	954.324	0.367597	0.101816	3.61039	0.000305736	0.00464523
C14orf1	ENSG00000133935.6	protein_coding	2541.83	-0.303701	0.0841583	-3.60869	0.000307753	0.00467056
EHD4	ENSG00000103966.5	protein_coding	2647.27	-0.268233	0.074361	-3.60717	0.000309554	0.00469256
ANKRD50	ENSG00000151458.7	protein_coding	3694.85	0.316579	0.0877839	3.60634	0.000310543	0.00470221
SCN1B	ENSG00000105711.6	protein_coding	133.225	0.567119	0.157397	3.60311	0.000314428	0.00475564
FIBCD1	ENSG00000130720.8	protein_coding	934.15	0.380467	0.105635	3.6017	0.000316144	0.00477077
KRT86	ENSG00000170442.7	protein_coding	250.521	0.483672	0.134281	3.60193	0.000315868	0.00477077
GPR126	ENSG00000112414.10	protein_coding	1491.86	-0.287644	0.0798782	-3.60103	0.000316961	0.0047777
ARPC1A	ENSG00000241685.4	protein_coding	5333.58	-0.263018	0.0730676	-3.59965	0.000318642	0.00479762
HSPD1	ENSG00000144381.12	protein_coding	12019.2	-0.237783	0.0661658	-3.59374	0.000325966	0.00490235
NOP58	ENSG00000055044.6	protein_coding	2596.95	-0.267354	0.0744258	-3.59223	0.000327864	0.00492095
SSBP4	ENSG00000130511.11	protein_coding	2514.47	0.310811	0.0865247	3.59217	0.00032794	0.00492095
FRK	ENSG00000111816.6	protein_coding	249.044	-0.453276	0.126367	-3.58697	0.000334537	0.0050143
PPP2R2C	ENSG00000074211.9	protein_coding	2251	0.32293	0.0900629	3.58561	0.000336291	0.00502929
ZFAND6	ENSG00000086666.14	protein_coding	2643.43	0.301668	0.0841309	3.5857	0.000336172	0.00502929
C17orf70	ENSG00000185504.12	protein_coding	2720.38	0.269526	0.0752077	3.58376	0.000338679	0.00505933
OSGIN2	ENSG00000164823.5	protein_coding	709.063	0.349748	0.0976773	3.58065	0.000342742	0.00511429
PHF19	ENSG00000119403.9	protein_coding	3931.98	-0.327299	0.0914346	-3.5796	0.000344122	0.00512915
FZD1	ENSG00000157240.2	protein_coding	3669.15	0.263529	0.0736319	3.57901	0.000344894	0.00513491
CYP26B1	ENSG00000003137.4	protein_coding	1239.93	0.305013	0.0852635	3.5773	0.000347163	0.00516294
RARA	ENSG00000131759.13	protein_coding	2598.63	0.309232	0.0864502	3.577	0.000347562	0.00516312
TMEM91	ENSG00000142046.10	protein_coding	303.398	0.418478	0.117008	3.57648	0.000348255	0.00516766
PTX3	ENSG00000163661.3	protein_coding	6654.55	-0.29985	0.0838558	-3.57578	0.000349188	0.00517574
MMD	ENSG00000108960.3	protein_coding	1364.65	-0.295557	0.0826814	-3.57465	0.000350692	0.00519226
AMPD2	ENSG00000116337.11	protein_coding	3354.48	0.252439	0.0706338	3.57391	0.000351687	0.00520122
RP11-1407O15.2	ENSG00000174093.6	protein_coding	930.746	0.345053	0.096591	3.57231	0.000353848	0.00522739
SEC14L2	ENSG00000100003.13	protein_coding	2239.54	0.281552	0.0789577	3.56586	0.000362668	0.0053502
NUDT16L1	ENSG00000168101.10	protein_coding	1048.96	0.37489	0.10514	3.56564	0.000362963	0.0053502
CENPH	ENSG00000153044.5	protein_coding	169.279	-0.501712	0.140842	-3.56222	0.000367727	0.00540846
TLR3	ENSG00000164342.8	protein_coding	228.104	-0.447944	0.125743	-3.56239	0.000367495	0.00540846
RAPGEF4	ENSG00000091428.13	protein_coding	273.138	0.492518	0.138333	3.56037	0.000370336	0.00544084
CEBPB	ENSG00000172216.4	protein_coding	5765.88	0.324302	0.0911084	3.55952	0.00037153	0.00545238
PLEKHB1	ENSG00000021300.9	protein_coding	1140.4	0.302668	0.0851134	3.55606	0.00037646	0.00551865
KRCC1	ENSG00000172086.7	protein_coding	947.953	0.349696	0.0983532	3.55551	0.00037724	0.00552402
CDC42EP5	ENSG00000167617.2	protein_coding	57.3564	0.585387	0.164701	3.55423	0.000379083	0.00554492
HYAL2	ENSG00000068001.9	protein_coding	2742.92	0.319484	0.0899138	3.55323	0.000380539	0.00556012
EPN2	ENSG00000072134.11	protein_coding	3023.22	0.255612	0.0719832	3.551	0.000383777	0.0056013
HOMER1	ENSG00000152413.10	protein_coding	547.691	0.387741	0.109338	3.54626	0.000390739	0.00569667
MAN1A1	ENSG00000111885.5	protein_coding	1475.9	0.323094	0.0911242	3.54564	0.000391655	0.0057038
MPHOSPH6	ENSG00000135698.5	protein_coding	1166.03	-0.321173	0.0906239	-3.54402	0.000394072	0.00573274
RPL39L	ENSG00000163923.5	protein_coding	527.315	-0.439485	0.124039	-3.54312	0.000395426	0.00574617
CNTNAP3B	ENSG00000154529.10	protein_coding	1590.1	0.301541	0.0852276	3.53806	0.000403073	0.00585092
RGS16	ENSG00000143333.6	protein_coding	272.339	0.421194	0.119119	3.53591	0.000406372	0.00589239
PRPF4	ENSG00000136875.8	protein_coding	2974.08	-0.284762	0.0806084	-3.53266	0.000411398	0.00595
SORBS2	ENSG00000154556.13	protein_coding	739.508	-0.353308	0.100017	-3.53248	0.000411683	0.00595
VBP1	ENSG00000155959.6	protein_coding	2108.02	-0.319816	0.0905247	-3.53291	0.000411006	0.00595
DLG4	ENSG00000132535.14	protein_coding	2622.59	0.270577	0.0766317	3.53088	0.00041418	0.00597961
LAMTOR3	ENSG00000109270.8	protein_coding	1189.87	0.365619	0.103582	3.52974	0.000415972	0.00599899
MIR4435-1HG	ENSG00000172965.10	lincRNA	1565.09	-0.279762	0.079341	-3.52607	0.000421781	0.0060762
HIST1H2AC	ENSG00000180573.8	protein_coding	3569.73	0.299697	0.0850018	3.52578	0.000422244	0.0060763
PSMA3	ENSG00000100567.8	protein_coding	5254.44	-0.269361	0.0764788	-3.52203	0.000428257	0.00615619
DNTTIP2	ENSG00000067334.9	protein_coding	4579.72	-0.253868	0.0721085	-3.52064	0.000430506	0.00618186
AQP3	ENSG00000165272.10	protein_coding	1639.9	0.305323	0.0867944	3.51777	0.000435185	0.00624233
ZFAND5	ENSG00000107372.8	protein_coding	16833.7	0.294846	0.0838641	3.51575	0.000438509	0.00628325
C1R	ENSG00000159403.11	protein_coding	2694.55	0.326479	0.0929033	3.51418	0.00044111	0.00631375
MSRA	ENSG00000175806.10	protein_coding	529.71	0.352412	0.100346	3.51197	0.000444803	0.00635977
XYLT2	ENSG00000015532.5	protein_coding	1773.47	0.281221	0.0800884	3.51138	0.000445783	0.00636015
CHURC1	ENSG00000258289.3	protein_coding	1255.95	-0.323862	0.0922252	-3.51164	0.00044535	0.00636015
ERAP1	ENSG00000164307.8	protein_coding	4950.3	-0.254245	0.0724313	-3.51016	0.000447838	0.00638266
MAST1	ENSG00000105613.5	protein_coding	617.644	0.362379	0.103268	3.50912	0.000449589	0.00640076
RBPJ	ENSG00000168214.16	protein_coding	10791.9	0.312152	0.0889797	3.50813	0.000451274	0.0064179
BCAM	ENSG00000187244.6	protein_coding	3271.89	0.251365	0.0717189	3.50487	0.000456835	0.00649007
DSG2	ENSG00000046604.8	protein_coding	6876.9	-0.317353	0.0905833	-3.50344	0.000459291	0.00651803
SRSF8	ENSG00000180771.10	pseudogene	773.547	-0.34358	0.0980812	-3.50301	0.000460032	0.0065216
TBL1X	ENSG00000101849.11	protein_coding	1938.75	-0.312878	0.0893644	-3.50115	0.000463254	0.00656031
PPIL1	ENSG00000137168.7	protein_coding	4419.02	-0.289735	0.0828068	-3.49892	0.000467142	0.00660134
BARD1	ENSG00000138376.6	protein_coding	398.086	-0.380055	0.108613	-3.49916	0.000466726	0.00660134
MTMR2	ENSG00000087053.14	protein_coding	3401.88	-0.254229	0.0726668	-3.49855	0.000467791	0.00660353
LAMTOR2	ENSG00000116586.7	protein_coding	2041.8	0.359659	0.102872	3.49617	0.00047198	0.00663458
WDR34	ENSG00000119333.7	protein_coding	3441.91	-0.371109	0.106133	-3.49663	0.000471169	0.00663458
CLIC3	ENSG00000169583.12	protein_coding	269.452	0.467888	0.133799	3.49694	0.000470635	0.00663458
TSPYL2	ENSG00000184205.10	protein_coding	2449.06	-0.302764	0.0865929	-3.49641	0.000471566	0.00663458
TMEM109	ENSG00000110108.5	protein_coding	5976.99	-0.285311	0.08165	-3.49431	0.000475285	0.00666938
PRRC2B	ENSG00000130723.13	protein_coding	14860.8	0.298585	0.0854513	3.49422	0.000475456	0.00666938
CLIP1	ENSG00000130779.15	protein_coding	6715.32	-0.259756	0.0743979	-3.49144	0.000480427	0.00673113
PPIH	ENSG00000171960.6	protein_coding	1407.86	-0.364503	0.104406	-3.49119	0.000480867	0.00673113
TSPAN9	ENSG00000011105.7	protein_coding	3370.79	0.256904	0.0737198	3.48487	0.000492367	0.00688489
GGCT	ENSG00000006625.13	protein_coding	842.216	-0.382092	0.109687	-3.48347	0.000494956	0.0069066
CSE1L	ENSG00000124207.12	protein_coding	12152.9	-0.297463	0.08539	-3.48358	0.000494747	0.0069066
DNAH1	ENSG00000114841.13	protein_coding	973.099	0.355093	0.101979	3.48203	0.000497627	0.00693662
DDIT4L	ENSG00000145358.2	protein_coding	834.967	0.413635	0.118819	3.48121	0.00049916	0.00695073
RPA3	ENSG00000106399.7	protein_coding	651.271	-0.396934	0.114044	-3.48053	0.000500422	0.00696103
NUP50	ENSG00000093000.14	protein_coding	2844.5	-0.272	0.0782441	-3.47631	0.000508369	0.00705685
SH3BP1	ENSG00000100092.16	protein_coding	304.039	0.413453	0.118934	3.47633	0.000508322	0.00705685
SCUBE3	ENSG00000146197.7	protein_coding	269.61	0.458377	0.131965	3.47347	0.000513768	0.00712439
SRPK2	ENSG00000135250.12	protein_coding	1384.53	0.337907	0.0972991	3.47287	0.000514921	0.00713297
CNOT3	ENSG00000088038.13	protein_coding	2924.09	0.277448	0.0799449	3.47049	0.000519516	0.00718915
RBBP7	ENSG00000102054.13	protein_coding	5775.63	-0.277259	0.0799092	-3.46968	0.00052108	0.00720332
LTV1	ENSG00000135521.8	protein_coding	1749.99	-0.275516	0.0794365	-3.46839	0.000523595	0.0072306
STX2	ENSG00000111450.9	protein_coding	1324.51	0.357822	0.103183	3.46785	0.000524643	0.00723757
WDPCP	ENSG00000143951.11	protein_coding	130.676	-0.505662	0.145855	-3.46688	0.000526542	0.00725627
SPDEF	ENSG00000124664.6	protein_coding	5530.73	0.309919	0.0894121	3.46619	0.000527887	0.0072673
C11orf95	ENSG00000188070.8	lincRNA	3095.74	0.249478	0.0720302	3.46351	0.000533168	0.00733243
SYT1	ENSG00000067715.9	protein_coding	102.198	-0.546967	0.158019	-3.46141	0.000537355	0.0073824
C17orf53	ENSG00000125319.10	protein_coding	359.39	-0.42477	0.12282	-3.45848	0.000543238	0.00745555
MTHFD1	ENSG00000100714.11	protein_coding	4322.16	-0.324349	0.0937999	-3.45788	0.00054444	0.00746383
BICD1	ENSG00000151746.9	protein_coding	1265.09	0.300853	0.0870114	3.45762	0.00054496	0.00746383
TOM1L1	ENSG00000141198.9	protein_coding	1472.23	-0.281798	0.0815163	-3.45695	0.000546333	0.00747495
FOXC1	ENSG00000054598.5	protein_coding	1232.37	0.322397	0.093275	3.45641	0.000547418	0.00748213
DSCR3	ENSG00000157538.9	protein_coding	3352.11	0.270342	0.0782498	3.45486	0.00055058	0.00751764
MITF	ENSG00000187098.10	protein_coding	675.211	-0.353838	0.102445	-3.45392	0.000552498	0.00753611
NAV3	ENSG00000067798.9	protein_coding	2833.19	-0.323673	0.0937408	-3.45285	0.000554694	0.00755834
AC002480.4	ENSG00000232949.1	antisense	81.12	-0.540108	0.156449	-3.4523	0.000555825	0.00756602
CHCHD3	ENSG00000106554.7	protein_coding	2445.35	-0.294286	0.0852672	-3.45133	0.000557822	0.00758547
SDPR	ENSG00000168497.4	protein_coding	1578.68	-0.306963	0.0889657	-3.45035	0.000559853	0.00760534
PDPR	ENSG00000090857.9	protein_coding	1970.09	0.353699	0.102535	3.44955	0.000561532	0.00762038
TIPIN	ENSG00000075131.5	protein_coding	364.589	-0.422592	0.122575	-3.44762	0.000565558	0.00766358
ARHGAP29	ENSG00000137962.8	protein_coding	10544.9	-0.26334	0.0763864	-3.44747	0.000565864	0.00766358
C1S	ENSG00000182326.10	protein_coding	1732.95	0.278752	0.0808676	3.44702	0.000566814	0.00766507
RNPC3	ENSG00000185946.11	protein_coding	1390.47	0.311607	0.0904029	3.44687	0.000567123	0.00766507
PIAS2	ENSG00000078043.11	protein_coding	694.544	0.345858	0.100374	3.44569	0.000569601	0.00769077
CELSR1	ENSG00000075275.12	protein_coding	2694.53	0.30376	0.0881754	3.44495	0.000571166	0.00770099
THEM6	ENSG00000130193.7	protein_coding	1488.48	-0.399621	0.116008	-3.44479	0.000571512	0.00770099
MT-CO3	ENSG00000198938.2	protein_coding	311049	-0.221454	0.0643069	-3.4437	0.000573809	0.00772413
SEMA6D	ENSG00000137872.11	protein_coding	155.682	0.506697	0.147378	3.43808	0.000585855	0.00787833
CENPN	ENSG00000166451.9	protein_coding	751.441	-0.366071	0.106484	-3.4378	0.000586454	0.00787845
TUBA4A	ENSG00000127824.9	protein_coding	1971.04	-0.325967	0.0948525	-3.43657	0.00058914	0.0079011
WRB	ENSG00000182093.10	protein_coding	1004.91	-0.334018	0.0971976	-3.43648	0.000589325	0.0079011
PCSK5	ENSG00000099139.9	protein_coding	847.723	0.314301	0.0914864	3.43549	0.000591474	0.00792195
PTPN21	ENSG00000070778.8	protein_coding	2411.34	0.287712	0.0838332	3.43195	0.00059925	0.00801805
POM121C	ENSG00000135213.8	protein_coding	2331.35	0.323147	0.0941922	3.43072	0.000601987	0.0080466
NALCN	ENSG00000102452.11	protein_coding	134.738	-0.505233	0.147305	-3.42984	0.000603946	0.00806372
SGCE	ENSG00000127990.11	protein_coding	2321.59	0.27	0.0787263	3.4296	0.000604477	0.00806372
AP1M2	ENSG00000129354.7	protein_coding	223.322	-0.477882	0.139422	-3.4276	0.000608933	0.00811505
CTSA	ENSG00000064601.12	protein_coding	16273.2	0.234297	0.0683753	3.42663	0.000611115	0.008136
SGSM2	ENSG00000141258.8	protein_coding	4667.93	0.263786	0.0770534	3.42342	0.000618388	0.00822462
KANK2	ENSG00000197256.6	protein_coding	12564.4	0.238617	0.0697368	3.42168	0.000622358	0.00826918
TFEB	ENSG00000112561.13	protein_coding	312.705	0.416815	0.121866	3.42028	0.000625561	0.00830346
NPM1	ENSG00000181163.9	protein_coding	56101.6	-0.225876	0.0660877	-3.41783	0.000631233	0.00837042
ZADH2	ENSG00000180011.6	protein_coding	1410.79	-0.285128	0.0834596	-3.41635	0.000634659	0.00840749
SHISA2	ENSG00000180730.4	protein_coding	3202.99	0.319288	0.0934859	3.41536	0.000636985	0.00842994
SCML2	ENSG00000102098.13	protein_coding	165.547	-0.478058	0.140023	-3.41414	0.000639841	0.0084426
ADCY6	ENSG00000174233.7	protein_coding	2544.82	0.250704	0.073424	3.41447	0.000639073	0.0084426
RP11-661A12.14	ENSG00000271912.1	lincRNA	299.82	0.407171	0.119254	3.41432	0.000639416	0.0084426
RWDD2A	ENSG00000013392.6	protein_coding	747.331	0.331252	0.097048	3.41328	0.00064186	0.00845253
VWDE	ENSG00000146530.7	protein_coding	126.397	-0.512456	0.150131	-3.4134	0.000641579	0.00845253
SEMA6A	ENSG00000092421.12	protein_coding	286.747	0.40147	0.11764	3.4127	0.000643227	0.00845383
SMAD2	ENSG00000175387.11	protein_coding	4340.65	0.292824	0.085799	3.4129	0.000642745	0.00845383
LGR6	ENSG00000133067.13	protein_coding	56.0097	0.554035	0.162416	3.4112	0.000646776	0.00849211
HSPA9	ENSG00000113013.8	protein_coding	17060.7	-0.236605	0.0693725	-3.41065	0.000648093	0.00850105
ZSWIM5	ENSG00000162415.6	protein_coding	658.728	0.33825	0.0992287	3.40879	0.000652517	0.00855066
MYL9	ENSG00000101335.5	protein_coding	1223.01	0.316261	0.0928147	3.40745	0.000655739	0.00857084
KIF11	ENSG00000138160.4	protein_coding	2314.33	-0.306644	0.0899884	-3.4076	0.000655378	0.00857084
GPAT2	ENSG00000186281.8	protein_coding	1713.28	-0.321401	0.0943259	-3.40734	0.000655984	0.00857084
ABCE1	ENSG00000164163.6	protein_coding	4893.71	-0.266097	0.0781096	-3.40671	0.000657519	0.00857634
2010-09-01	ENSG00000186522.10	protein_coding	4862.28	-0.280181	0.0822457	-3.40663	0.000657691	0.00857634
OTUD4	ENSG00000164164.11	protein_coding	4619.42	-0.254871	0.0748312	-3.40594	0.000659357	0.00858967
ARID5A	ENSG00000196843.11	protein_coding	631.211	0.381445	0.11204	3.40455	0.000662739	0.0086253
TAOK2	ENSG00000149930.13	protein_coding	4127.73	0.241749	0.0710151	3.40419	0.000663613	0.00862827
ZFHX2	ENSG00000136367.12	protein_coding	251.009	0.437506	0.128582	3.40254	0.000667614	0.00867183
RARRES3	ENSG00000133321.6	protein_coding	1637.43	-0.364637	0.107193	-3.40167	0.00066975	0.00869111
TNRC6C	ENSG00000078687.12	protein_coding	691.972	0.392148	0.115313	3.40074	0.000672044	0.00870424
MYC	ENSG00000136997.10	protein_coding	7857.24	-0.235014	0.0691071	-3.40073	0.000672066	0.00870424
C20orf112	ENSG00000197183.8	protein_coding	1063.59	0.295281	0.0868553	3.39969	0.000674627	0.00872893
PEAR1	ENSG00000187800.9	protein_coding	549.529	-0.335504	0.0986999	-3.39923	0.000675757	0.00873508
PACSIN3	ENSG00000165912.11	protein_coding	1754.94	0.29591	0.0870654	3.39871	0.000677053	0.00874224
PJA2	ENSG00000198961.5	protein_coding	10183.5	0.296086	0.087123	3.39848	0.000677622	0.00874224
SATB2	ENSG00000119042.12	protein_coding	1098.01	0.359313	0.105756	3.39757	0.000679861	0.00876266
EIF3J-AS1	ENSG00000179523.4	lincRNA	332.789	0.392438	0.115537	3.39665	0.000682155	0.00878373
DAAM1	ENSG00000100592.11	protein_coding	1602.61	-0.269982	0.0794955	-3.39619	0.000683311	0.00879013
CAPRIN2	ENSG00000110888.13	protein_coding	7988.09	0.265138	0.0781204	3.39396	0.000688888	0.00885333
GOT2	ENSG00000125166.8	protein_coding	3529.86	-0.275305	0.0811365	-3.39311	0.000691035	0.00887238
TMEM8A	ENSG00000129925.6	protein_coding	4882.05	0.289312	0.0852744	3.39272	0.000692015	0.00887642
PTPN9	ENSG00000169410.5	protein_coding	1573.47	0.274151	0.0808289	3.39175	0.000694471	0.00889937
EMC9	ENSG00000100908.9	protein_coding	557.696	0.443849	0.130879	3.39129	0.00069565	0.00890593
LAPTM5	ENSG00000162511.7	protein_coding	8272.18	-0.249052	0.0734734	-3.38968	0.000699734	0.00894105
SHISA4	ENSG00000198892.6	protein_coding	1694.41	0.342356	0.100992	3.38993	0.000699101	0.00894105
WDR70	ENSG00000082068.4	protein_coding	1271.32	-0.304501	0.0898651	-3.38842	0.000702963	0.00897248
SLC2A8	ENSG00000136856.13	protein_coding	460.027	0.363761	0.107361	3.3882	0.000703539	0.00897248
PIGN	ENSG00000197563.5	protein_coding	866.476	0.344413	0.101662	3.38781	0.00070454	0.00897666
MCMBP	ENSG00000197771.8	protein_coding	4942.31	-0.255723	0.0754948	-3.3873	0.000705854	0.00898482
MRPS9	ENSG00000135972.4	protein_coding	630.546	0.321198	0.0948493	3.3864	0.000708162	0.0090056
NFE2L2	ENSG00000116044.11	protein_coding	5693.87	-0.241517	0.0713366	-3.3856	0.000710236	0.00902338
ATRX	ENSG00000085224.16	protein_coding	6507.58	0.295537	0.0873117	3.38485	0.000712177	0.00903943
PIGA	ENSG00000165195.9	protein_coding	767.415	-0.333169	0.0984464	-3.38427	0.000713689	0.00904142
ARHGAP23	ENSG00000225485.3	protein_coding	5745.54	-0.234303	0.0692298	-3.38443	0.000713262	0.00904142
ZNF850	ENSG00000267041.1	protein_coding	306.007	-0.396686	0.117377	-3.3796	0.000725918	0.00918762
RSPRY1	ENSG00000159579.9	protein_coding	1930	0.278444	0.0824105	3.37874	0.000728179	0.00920749
CLOCK	ENSG00000134852.10	protein_coding	2805.35	-0.246327	0.0729174	-3.37817	0.000729703	0.00921803
PDCD1LG2	ENSG00000197646.6	protein_coding	88.372	-0.541453	0.160398	-3.37569	0.000736316	0.00929277
TGIF1	ENSG00000177426.16	protein_coding	6073.94	0.235112	0.0696821	3.37407	0.000740652	0.00932984
FIGN	ENSG00000182263.9	protein_coding	389.314	-0.395717	0.117278	-3.37419	0.000740345	0.00932984
RASSF2	ENSG00000101265.11	protein_coding	312.952	0.420848	0.124812	3.37184	0.000746671	0.00939678
PTDSS1	ENSG00000156471.8	protein_coding	4733.08	-0.246231	0.0730318	-3.37155	0.000747458	0.00939782
FAM72A	ENSG00000196550.6	protein_coding	100.979	-0.519533	0.154134	-3.37065	0.000749911	0.00941979
FAM105A	ENSG00000145569.5	protein_coding	838.626	-0.319599	0.0949283	-3.36674	0.000760611	0.00953623
LYPD1	ENSG00000150551.10	protein_coding	132.585	0.490782	0.145764	3.36695	0.000760044	0.00953623
FAM135A	ENSG00000082269.12	protein_coding	620.727	0.368505	0.109495	3.36551	0.00076402	0.009561
TMEM2	ENSG00000135048.9	protein_coding	6471.54	-0.292301	0.0868462	-3.36573	0.000763414	0.009561
CACYBP	ENSG00000116161.13	protein_coding	4615.74	-0.26101	0.0775865	-3.36411	0.000767901	0.00959981
STOM	ENSG00000148175.8	protein_coding	1042.69	-0.329562	0.0979708	-3.36388	0.00076856	0.00959981
RUNX2	ENSG00000124813.16	protein_coding	1695.07	0.311914	0.0927439	3.36318	0.000770501	0.00961504
RP11-23P13.7	ENSG00000272003.1	lincRNA	103.766	-0.523376	0.155654	-3.36242	0.000772618	0.00963246
KLHL29	ENSG00000119771.10	protein_coding	1992.35	-0.278487	0.08284	-3.36174	0.00077452	0.00963815
RTKN2	ENSG00000182010.6	protein_coding	200.6	-0.480467	0.142917	-3.36186	0.000774189	0.00963815
KDM6B	ENSG00000132510.6	protein_coding	3315.87	0.264979	0.0788308	3.36137	0.000775582	0.00964237
SNRPA	ENSG00000077312.4	protein_coding	1838.33	-0.306717	0.0912715	-3.3605	0.000778028	0.00965636
CAV2	ENSG00000105971.10	protein_coding	1920.38	-0.268081	0.0797752	-3.36045	0.000778155	0.00965636
NFIB	ENSG00000147862.10	protein_coding	900.44	0.34328	0.1022	3.35891	0.000782491	0.00970115
LRFN3	ENSG00000126243.4	protein_coding	1190.72	0.290641	0.0865525	3.35797	0.000785178	0.00972511
NET1	ENSG00000173848.14	protein_coding	13227	0.22742	0.0677305	3.35772	0.000785882	0.00972511
ABCC3	ENSG00000108846.11	protein_coding	6214.41	0.265337	0.0790451	3.35678	0.000788545	0.00973999
DNAH2	ENSG00000183914.10	protein_coding	5413.9	-0.331316	0.0986942	-3.357	0.00078794	0.00973999
CEP152	ENSG00000103995.9	protein_coding	503.312	-0.33987	0.101261	-3.35637	0.000789734	0.00974566
SEC23B	ENSG00000101310.10	protein_coding	6533.58	-0.237837	0.0709094	-3.3541	0.000796232	0.00980251
ZBTB3	ENSG00000185670.7	protein_coding	404.181	0.380769	0.113527	3.35399	0.000796546	0.00980251
TMEM158	ENSG00000249992.1	protein_coding	4413.79	0.35564	0.106022	3.3544	0.000795382	0.00980251
DNAJB2	ENSG00000135924.11	protein_coding	3269.41	0.280201	0.083573	3.35277	0.000800074	0.00983686
ATP9B	ENSG00000166377.15	protein_coding	1095.92	-0.299155	0.0892337	-3.35249	0.000800873	0.00983762
E2F2	ENSG00000007968.6	protein_coding	194.635	-0.482393	0.143931	-3.35155	0.000803603	0.00984395
SMS	ENSG00000102172.11	protein_coding	7503.56	-0.222499	0.0663847	-3.35165	0.000803309	0.00984395
FDPS	ENSG00000160752.10	protein_coding	6269.11	-0.252379	0.0752952	-3.35186	0.000802699	0.00984395
PDCD10	ENSG00000114209.10	protein_coding	2661.08	-0.272563	0.0813894	-3.34887	0.000811417	0.00993056
CNIH3	ENSG00000143786.3	protein_coding	1853.96	0.264994	0.0792011	3.34584	0.000820339	0.0100305
TCEA3	ENSG00000204219.5	protein_coding	1992.51	0.262759	0.0785545	3.34492	0.000823055	0.0100545
VPS8	ENSG00000156931.11	protein_coding	2052.35	0.295694	0.0884752	3.34211	0.00083144	0.0101477
AC016738.4	ENSG00000223947.1	antisense	213.094	0.423729	0.126814	3.34135	0.000833728	0.0101663
BAIAP3	ENSG00000007516.9	protein_coding	1033.26	0.290716	0.0870257	3.34058	0.000836035	0.0101851
NEB	ENSG00000183091.15	protein_coding	152.395	0.478729	0.143405	3.33829	0.000842944	0.0102599
CEP70	ENSG00000114107.4	protein_coding	753.563	-0.338547	0.101437	-3.33752	0.000845292	0.0102791
G2E3	ENSG00000092140.10	protein_coding	1040.38	-0.290896	0.0871933	-3.33622	0.000849265	0.010318
SC5D	ENSG00000109929.5	protein_coding	2202.51	-0.295194	0.0885031	-3.33541	0.000851751	0.0103388
SAMSN1	ENSG00000155307.13	protein_coding	129.866	-0.497139	0.149114	-3.33395	0.000856224	0.0103837
CBX7	ENSG00000100307.8	protein_coding	1280.98	0.27419	0.0822617	3.33314	0.000858722	0.0104045
PPAT	ENSG00000128059.4	protein_coding	958.374	-0.29677	0.0890615	-3.3322	0.000861636	0.010421
SLC45A3	ENSG00000158715.5	protein_coding	839.098	0.304368	0.0913417	3.33219	0.000861644	0.010421
ATP6V1C1	ENSG00000155097.7	protein_coding	5802.34	-0.234998	0.0705515	-3.33087	0.000865759	0.0104613
APOL1	ENSG00000100342.16	protein_coding	1231.18	0.308111	0.0925676	3.32849	0.00087317	0.0105413
GOLPH3L	ENSG00000143457.6	protein_coding	2312.52	-0.254783	0.0765529	-3.32819	0.000874107	0.010543
AGO2	ENSG00000123908.7	protein_coding	3430.3	0.311574	0.0936365	3.32748	0.000876339	0.0105604
VMAC	ENSG00000187650.3	protein_coding	216.78	0.42001	0.126304	3.32539	0.000882954	0.0106305
RTTN	ENSG00000176225.8	protein_coding	624.581	-0.352797	0.106132	-3.32414	0.000886902	0.0106684
SWT1	ENSG00000116668.8	protein_coding	805.028	0.330444	0.0994561	3.32251	0.000892118	0.0107118
ARPP19	ENSG00000128989.6	protein_coding	5926.53	-0.242064	0.0728534	-3.32262	0.000891751	0.0107118
TIGD2	ENSG00000180346.2	protein_coding	456.247	-0.348798	0.104993	-3.32211	0.00089341	0.0107177
KCND1	ENSG00000102057.5	protein_coding	187.77	-0.439983	0.132605	-3.31801	0.000906626	0.0108665
CDH4	ENSG00000179242.11	protein_coding	1365.63	-0.286119	0.0862567	-3.31707	0.000909681	0.0108933
LTBP4	ENSG00000090006.13	protein_coding	8299.13	0.252756	0.0762837	3.31337	0.000921792	0.0110284
APTX	ENSG00000137074.14	protein_coding	1590.11	-0.292604	0.088317	-3.31311	0.000922647	0.0110288
SEC24B	ENSG00000138802.7	protein_coding	3616.92	0.291944	0.0881268	3.31277	0.000923769	0.0110323
DNMT3A	ENSG00000119772.12	protein_coding	1029.93	0.285602	0.0862254	3.31227	0.000925434	0.0110423
RMDN3	ENSG00000137824.11	protein_coding	1445.44	0.26816	0.0810117	3.31014	0.000932491	0.0111166
HNRNPA1	ENSG00000135486.13	protein_coding	48736	-0.220628	0.0666641	-3.30955	0.000934468	0.0111302
CNTNAP3	ENSG00000106714.13	protein_coding	2699.46	0.267394	0.0808048	3.30914	0.000935837	0.0111365
CACHD1	ENSG00000158966.9	protein_coding	384.965	0.371875	0.112446	3.30713	0.000942562	0.0112066
MXI1	ENSG00000119950.16	protein_coding	4650.06	0.29576	0.0894848	3.30514	0.000949282	0.0112764
GCLC	ENSG00000001084.6	protein_coding	1466.64	-0.26405	0.0799	-3.30475	0.000950599	0.011282
HAS2	ENSG00000170961.6	protein_coding	5375.94	0.250893	0.0759396	3.30385	0.000953663	0.0112996
NEURL1B	ENSG00000214357.4	protein_coding	365.707	-0.399934	0.121052	-3.30382	0.000953777	0.0112996
ABCC4	ENSG00000125257.9	protein_coding	1850.64	0.300708	0.0910372	3.30314	0.000956095	0.011317
KIAA1737	ENSG00000198894.3	protein_coding	793.919	0.330729	0.100195	3.30086	0.000963883	0.0113991
ANKRD32	ENSG00000133302.8	protein_coding	407.034	-0.403225	0.122179	-3.30027	0.000965909	0.011413
RP11-1055B8.7	ENSG00000171282.9	protein_coding	4040.57	0.260506	0.0789605	3.29919	0.000969643	0.0114469
PSMD1	ENSG00000173692.8	protein_coding	6096.49	-0.244644	0.0741611	-3.29882	0.000970937	0.0114521
CTSD	ENSG00000117984.8	protein_coding	103725	0.275277	0.0834699	3.29792	0.000974052	0.0114787
DIS3	ENSG00000083520.10	protein_coding	2910.11	-0.239681	0.0727135	-3.29624	0.000979894	0.0115145
LEF1	ENSG00000138795.5	protein_coding	596.79	0.332272	0.1008	3.29634	0.000979522	0.0115145
SHQ1	ENSG00000144736.9	protein_coding	942.396	-0.288221	0.0874443	-3.29605	0.000980546	0.0115145
VEGFB	ENSG00000173511.5	protein_coding	3775.88	0.279898	0.0849133	3.29628	0.00097975	0.0115145
PKMYT1	ENSG00000127564.12	protein_coding	427.139	-0.412352	0.125178	-3.29412	0.000987312	0.0115838
NOTCH1	ENSG00000148400.9	protein_coding	5412.96	0.283614	0.0861387	3.29253	0.000992911	0.0116392
DHX15	ENSG00000109606.8	protein_coding	12527.3	-0.229545	0.0697243	-3.29218	0.000994146	0.011642
CD163L1	ENSG00000177675.4	protein_coding	767.306	-0.320365	0.0973171	-3.29197	0.000994895	0.011642
MCC	ENSG00000171444.13	protein_coding	961.728	0.365985	0.111214	3.29081	0.000998977	0.0116795
LAMA5	ENSG00000130702.9	protein_coding	64205.3	0.235064	0.0714543	3.28971	0.00100291	0.0117152
YARS	ENSG00000134684.6	protein_coding	6314.24	-0.26992	0.0821034	-3.28756	0.0010106	0.0117947
MAPKAPK5	ENSG00000089022.9	protein_coding	2348.45	-0.272457	0.0829104	-3.28616	0.00101565	0.0118433
RFWD3	ENSG00000168411.9	protein_coding	2899.29	-0.266651	0.0811748	-3.2849	0.00102019	0.0118859
CEP63	ENSG00000182923.12	protein_coding	930.518	-0.299047	0.0913199	-3.27472	0.00105765	0.0123116
GSPT1	ENSG00000103342.8	protein_coding	6855.67	-0.236025	0.0720814	-3.27442	0.0010588	0.0123142
ATF6B	ENSG00000213676.6	protein_coding	5389.13	0.252755	0.0771982	3.27411	0.00105996	0.0123169
ADAMTS7	ENSG00000136378.10	protein_coding	237.603	0.424315	0.129707	3.27134	0.0010704	0.0124275
TTLL5	ENSG00000119685.15	protein_coding	2155.7	-0.283244	0.0866115	-3.27028	0.00107442	0.0124632
CYP27A1	ENSG00000135929.4	protein_coding	1025.37	0.320399	0.0980105	3.26903	0.00107918	0.0125076
KAT2B	ENSG00000114166.7	protein_coding	1366.29	0.316746	0.0969429	3.26734	0.00108562	0.0125495
CLN6	ENSG00000128973.7	protein_coding	1066.76	-0.307938	0.0942428	-3.2675	0.00108502	0.0125495
CRELD1	ENSG00000163703.13	protein_coding	3539.38	0.255065	0.0780532	3.26783	0.00108375	0.0125495
POMT1	ENSG00000130714.11	protein_coding	2257.83	0.248896	0.0761978	3.26645	0.00108907	0.0125785
UHMK1	ENSG00000152332.11	protein_coding	6486.17	0.291176	0.0891783	3.2651	0.00109426	0.0126275
DCAF4	ENSG00000119599.12	protein_coding	2067.2	0.255617	0.0783004	3.26456	0.00109633	0.0126405
ADAM8	ENSG00000151651.11	protein_coding	45513.7	0.274457	0.0841115	3.26301	0.00110235	0.0126989
ROCK2	ENSG00000134318.9	protein_coding	4628.71	-0.276249	0.0846808	-3.26224	0.00110536	0.0127226
PDIA5	ENSG00000065485.13	protein_coding	1529.83	-0.279374	0.0856726	-3.26095	0.00111039	0.0127695
PGF	ENSG00000119630.9	protein_coding	3099.98	0.314665	0.0965284	3.25982	0.00111482	0.0128094
PHYKPL	ENSG00000175309.10	protein_coding	1352.18	0.333108	0.102202	3.25932	0.00111681	0.0128212
RP11-818F20.5	ENSG00000257732.1	antisense	87.6631	-0.517091	0.158734	-3.2576	0.00112359	0.012888
SPDYE3	ENSG00000214300.6	protein_coding	85.2056	-0.509097	0.156305	-3.25708	0.00112564	0.0129004
IFNGR2	ENSG00000159128.10	protein_coding	4322.93	0.251584	0.0772538	3.25659	0.0011276	0.0129118
AMH	ENSG00000104899.4	protein_coding	425.028	-0.397437	0.12206	-3.25607	0.00112967	0.0129244
PSMC1	ENSG00000100764.9	protein_coding	8796.13	-0.233483	0.0717899	-3.25231	0.00114473	0.0130854
SLC22A18	ENSG00000110628.9	protein_coding	1082.42	0.337181	0.103758	3.2497	0.00115526	0.0131918
SARDH	ENSG00000123453.12	protein_coding	1566.94	-0.291781	0.0897922	-3.24952	0.00115602	0.0131918
C10orf54	ENSG00000107738.15	protein_coding	401.778	-0.384003	0.118198	-3.24881	0.00115888	0.013202
TP53INP1	ENSG00000164938.9	protein_coding	2217.78	0.332654	0.102386	3.24903	0.001158	0.013202
RP11-108K14.4	ENSG00000214279.8	pseudogene	322.173	0.40237	0.123902	3.24748	0.00116431	0.0132524
RP11-566E18.3	ENSG00000260804.2	lincRNA	408.505	-0.419635	0.129288	-3.24574	0.00117147	0.0133227
GPSM2	ENSG00000121957.8	protein_coding	2223.36	-0.269705	0.083118	-3.24484	0.00117515	0.013353
ZNF514	ENSG00000144026.7	protein_coding	1220.51	0.330146	0.101754	3.24454	0.00117639	0.0133558
SSH3	ENSG00000172830.8	protein_coding	1061.7	0.339454	0.104662	3.24333	0.00118143	0.0134016
CASC7	ENSG00000259758.1	lincRNA	7651.2	0.323798	0.0998646	3.24237	0.0011854	0.0134352
TINAGL1	ENSG00000142910.11	protein_coding	5923.43	-0.3149	0.0971415	-3.24166	0.00118836	0.0134573
RP11-268J15.5	ENSG00000116883.8	protein_coding	706.745	0.375658	0.115893	3.24141	0.0011894	0.0134577
LINC00601	ENSG00000235180.1	lincRNA	56.7506	-0.53147	0.164029	-3.24009	0.00119491	0.0135085
AQR	ENSG00000021776.6	protein_coding	2591.82	-0.245629	0.0758461	-3.23852	0.0012015	0.0135716
HSPB1	ENSG00000106211.8	protein_coding	5043.01	0.347336	0.107265	3.23812	0.00120322	0.0135795
SLC7A2	ENSG00000003989.12	protein_coding	835.496	0.318559	0.0984368	3.23618	0.00121143	0.0136606
PLEKHG5	ENSG00000171680.16	protein_coding	765.867	0.328092	0.10145	3.23403	0.00122057	0.013752
ERH	ENSG00000100632.6	protein_coding	4195.56	-0.270469	0.0836597	-3.23297	0.00122512	0.0137917
DDX21	ENSG00000165732.8	protein_coding	9419.08	-0.233556	0.0722708	-3.23168	0.00123067	0.0138424
RCN3	ENSG00000142552.3	protein_coding	330.779	0.372995	0.115462	3.23046	0.00123589	0.0138711
TMEM133	ENSG00000170647.2	protein_coding	450.119	-0.334863	0.103661	-3.23036	0.00123634	0.0138711
ZHX3	ENSG00000174306.17	protein_coding	3147.88	0.294871	0.091278	3.23048	0.00123584	0.0138711
STARD13	ENSG00000133121.16	protein_coding	1035.64	-0.285225	0.0883052	-3.22999	0.00123796	0.0138776
UBL7	ENSG00000138629.11	protein_coding	2046.67	0.289755	0.0897508	3.22844	0.00124466	0.013941
XRCC6	ENSG00000196419.8	protein_coding	18739.4	-0.254513	0.0788585	-3.22747	0.00124891	0.0139769
KIF3B	ENSG00000101350.6	protein_coding	6993.08	-0.228519	0.0709128	-3.22254	0.00127059	0.0142076
KCNIP3	ENSG00000115041.8	protein_coding	493.456	0.338923	0.105212	3.22133	0.00127596	0.0142557
IL1A	ENSG00000115008.5	protein_coding	1862.77	-0.378248	0.11752	-3.21857	0.0012883	0.0143815
ENOX2	ENSG00000165675.12	protein_coding	955.06	-0.299101	0.0929436	-3.21809	0.00129049	0.0143819
ANXA2	ENSG00000182718.12	protein_coding	119710	-0.229389	0.07128	-3.21815	0.00129022	0.0143819
ANK1	ENSG00000029534.15	protein_coding	762.863	0.351422	0.109238	3.21702	0.00129528	0.0144232
SH3BP2	ENSG00000087266.11	protein_coding	10190.8	0.2501	0.0777765	3.21563	0.00130159	0.0144814
PLCD3	ENSG00000161714.7	protein_coding	5323.52	0.234236	0.0728644	3.21469	0.00130585	0.0145167
ISYNA1	ENSG00000105655.14	protein_coding	795.691	0.334558	0.104186	3.21116	0.00132201	0.0146841
ASCC3	ENSG00000112249.9	protein_coding	3477.76	-0.252078	0.0785256	-3.21013	0.00132673	0.0147193
UGP2	ENSG00000169764.10	protein_coding	7609.11	0.259329	0.0807882	3.20999	0.00132739	0.0147193
FAM84A	ENSG00000162981.12	protein_coding	244.616	0.395819	0.123347	3.20897	0.00133211	0.0147472
RP11-1277A3.1	ENSG00000247679.2	antisense	149.824	0.45164	0.140738	3.20908	0.00133159	0.0147472
ALDOC	ENSG00000109107.9	protein_coding	2126.66	0.285442	0.0889598	3.20866	0.00133355	0.0147509
FLCN	ENSG00000154803.8	protein_coding	2366.39	0.241465	0.0752763	3.20772	0.00133792	0.0147869
KIF24	ENSG00000186638.11	protein_coding	546.758	-0.406257	0.126708	-3.20626	0.00134473	0.0148499
LRR1	ENSG00000165501.12	protein_coding	706.441	-0.354866	0.11073	-3.20479	0.00135163	0.0149014
IDH3A	ENSG00000166411.9	protein_coding	785.875	0.302703	0.0944532	3.2048	0.00135158	0.0149014
APCDD1L-AS1	ENSG00000231290.1	processed_transcript	498.115	0.33281	0.103897	3.20328	0.00135873	0.0149673
PASK	ENSG00000115687.9	protein_coding	353.156	-0.419619	0.131012	-3.20291	0.00136048	0.0149743
CLASP1	ENSG00000074054.13	protein_coding	3410.04	0.294415	0.0919342	3.20246	0.0013626	0.0149853
DIAPH1	ENSG00000131504.11	protein_coding	10446.4	-0.233523	0.0729702	-3.20026	0.00137304	0.0150876
CCDC138	ENSG00000163006.7	protein_coding	229.622	-0.408856	0.127788	-3.19949	0.0013767	0.0151153
ETS1	ENSG00000134954.10	protein_coding	12133.8	-0.250285	0.0782533	-3.19839	0.00138195	0.0151569
CCT3	ENSG00000163468.10	protein_coding	19889	-0.256008	0.0800469	-3.19823	0.00138276	0.0151569
SHMT1	ENSG00000176974.13	protein_coding	1236.18	-0.318648	0.0997033	-3.19596	0.00139366	0.0152639
RAB27A	ENSG00000069974.11	protein_coding	2132.27	0.289338	0.09054	3.19569	0.00139496	0.0152656
VASN	ENSG00000168140.4	protein_coding	2002.32	0.276317	0.0864799	3.19516	0.00139754	0.0152813
CACNB3	ENSG00000167535.3	protein_coding	809.192	0.293054	0.0917339	3.1946	0.00140023	0.0152982
OASL	ENSG00000135114.8	protein_coding	1908.53	-0.257971	0.0807652	-3.19408	0.00140275	0.0153132
RABEP2	ENSG00000177548.8	protein_coding	1061.44	0.305358	0.0957034	3.19067	0.00141943	0.0154699
HIGD1A	ENSG00000181061.9	protein_coding	3320.04	-0.243752	0.0763933	-3.19076	0.00141901	0.0154699
FARSB	ENSG00000116120.8	protein_coding	1548.79	-0.285906	0.0896299	-3.18985	0.00142348	0.0154877
EDNRA	ENSG00000151617.11	protein_coding	491.3	0.377039	0.118195	3.18996	0.00142291	0.0154877
INHBB	ENSG00000163083.5	protein_coding	554.016	0.359668	0.112762	3.18963	0.00142454	0.0154877
RP11-235E17.6	ENSG00000262903.1	antisense	289.009	0.437812	0.137319	3.18828	0.00143122	0.0155476
ZCCHC17	ENSG00000121766.10	protein_coding	1779.23	-0.266279	0.0835296	-3.18784	0.00143337	0.0155583
FCGBP	ENSG00000090920.9	protein_coding	1176.55	0.302945	0.0950781	3.18628	0.00144116	0.0156302
TRIM6	ENSG00000121236.15	protein_coding	135.803	-0.456286	0.143309	-3.18394	0.00145285	0.0157186
BTN2A2	ENSG00000124508.12	protein_coding	2551.63	0.231499	0.0727029	3.18417	0.00145169	0.0157186
FN3K	ENSG00000167363.9	protein_coding	259.754	0.382892	0.120242	3.18434	0.00145086	0.0157186
PLCG1	ENSG00000124181.10	protein_coding	9182.29	0.234656	0.0737162	3.18323	0.00145641	0.0157443
CICP14	ENSG00000271529.1	pseudogene	1079.92	0.34652	0.108909	3.18175	0.00146391	0.0158126
NUAK1	ENSG00000074590.9	protein_coding	4472.38	0.252929	0.0795179	3.18078	0.0014688	0.0158398
SLC26A11	ENSG00000181045.10	protein_coding	872.796	0.292201	0.0918615	3.18088	0.00146827	0.0158398
EML3	ENSG00000149499.7	protein_coding	2636.4	0.2661	0.0836694	3.18037	0.00147086	0.0158492
TMC7	ENSG00000170537.8	protein_coding	426.773	0.347377	0.109244	3.17982	0.00147368	0.0158667
FAM173A	ENSG00000103254.5	protein_coding	356.171	0.437992	0.137785	3.1788	0.00147886	0.0159096
NUP205	ENSG00000155561.10	protein_coding	4395.25	-0.275164	0.0866065	-3.17718	0.00148717	0.0159861
CFI	ENSG00000205403.8	protein_coding	1568.29	-0.279726	0.088056	-3.17669	0.00148968	0.0160003
GYS1	ENSG00000104812.10	protein_coding	5456.06	0.248238	0.0781614	3.17597	0.00149337	0.0160141
GPD2	ENSG00000115159.11	protein_coding	2584.36	-0.252281	0.0794295	-3.17617	0.00149234	0.0160141
SLPI	ENSG00000124107.5	protein_coding	402.54	-0.401526	0.126518	-3.17368	0.00150522	0.0161152
DDX46	ENSG00000145833.11	protein_coding	6410.11	-0.241153	0.0759833	-3.17376	0.00150477	0.0161152
PCDH20	ENSG00000197991.10	protein_coding	355.213	-0.358513	0.112984	-3.17315	0.00150797	0.0161317
METTL16	ENSG00000127804.8	protein_coding	1216.42	0.289324	0.0911945	3.1726	0.00151078	0.0161489
SIRT3	ENSG00000142082.10	protein_coding	1044.08	0.283678	0.0894297	3.17207	0.00151354	0.0161655
TES	ENSG00000135269.13	protein_coding	4031.06	-0.234152	0.0738257	-3.17169	0.00151554	0.0161738
HNRNPA2B1	ENSG00000122566.16	protein_coding	39899.9	-0.240627	0.0759061	-3.17006	0.00152409	0.0162521
SLC38A2	ENSG00000134294.9	protein_coding	31334.6	-0.239929	0.0757974	-3.1654	0.0015487	0.0165013
ANGEL1	ENSG00000013523.5	protein_coding	825.843	0.310112	0.0979874	3.16481	0.00155183	0.0165215
CEP97	ENSG00000182504.6	protein_coding	1226.9	-0.283494	0.0896371	-3.16269	0.00156319	0.0166292
CLK4	ENSG00000113240.8	protein_coding	1744.49	0.254516	0.0805183	3.16097	0.00157244	0.0167143
HSD3B7	ENSG00000099377.9	protein_coding	1423.4	0.31184	0.0986882	3.15985	0.00157852	0.0167655
THOP1	ENSG00000172009.10	protein_coding	2648.81	-0.319185	0.101021	-3.1596	0.00157985	0.0167663
NSUN2	ENSG00000037474.10	protein_coding	4156.77	-0.222982	0.0706297	-3.15705	0.00159372	0.0168909
SPINK5	ENSG00000133710.11	protein_coding	81.1721	-0.496137	0.157156	-3.15698	0.00159413	0.0168909
CCDC150	ENSG00000144395.13	protein_coding	196.183	-0.435773	0.138047	-3.15669	0.00159569	0.0168941
CTSB	ENSG00000164733.16	protein_coding	32184.1	0.234538	0.0743139	3.15605	0.00159923	0.0169181
TPGS2	ENSG00000134779.10	protein_coding	3912.93	-0.22417	0.0710682	-3.15429	0.00160887	0.0170066
STK32A	ENSG00000169302.10	protein_coding	81.8578	0.512234	0.162439	3.15339	0.00161386	0.0170458
PPIA	ENSG00000196262.9	protein_coding	57438.6	-0.25856	0.0820145	-3.15261	0.0016182	0.0170781
PMEPA1	ENSG00000124225.11	protein_coding	5729.83	0.260057	0.082496	3.15236	0.00161957	0.0170791
SGK1	ENSG00000118515.7	protein_coding	2760.27	-0.286608	0.0909268	-3.15208	0.00162112	0.0170819
RP11-284F21.10	ENSG00000272405.1	antisense	154.994	-0.438596	0.139165	-3.15163	0.00162362	0.0170948
HECTD3	ENSG00000126107.10	protein_coding	4960.28	-0.228065	0.0723827	-3.15082	0.00162813	0.0171153
C17orf62	ENSG00000178927.12	protein_coding	4298.38	0.236152	0.074944	3.15104	0.00162689	0.0171153
LINC00511	ENSG00000227036.2	lincRNA	662.041	-0.301294	0.0956531	-3.14986	0.00163349	0.0171581
FGF14	ENSG00000102466.11	protein_coding	200.435	-0.423169	0.134391	-3.14879	0.00163948	0.0172075
EPHA2	ENSG00000142627.9	protein_coding	23169.4	-0.220987	0.0702084	-3.14759	0.00164623	0.0172647
PFKFB4	ENSG00000114268.7	protein_coding	6531.67	0.273699	0.0870139	3.14546	0.00165827	0.01735
SBNO1	ENSG00000139697.7	protein_coding	7060.54	0.274701	0.0873258	3.1457	0.00165691	0.01735
ADAMTSL4	ENSG00000143382.9	protein_coding	705.443	0.308891	0.0981955	3.14567	0.00165706	0.01735
DDAH2	ENSG00000213722.4	protein_coding	5444.21	0.284498	0.0905176	3.14302	0.00167215	0.0174816
GINS3	ENSG00000181938.9	protein_coding	361.83	-0.391162	0.124533	-3.14104	0.00168348	0.0175862
LAS1L	ENSG00000001497.12	protein_coding	2813.58	-0.255618	0.0814383	-3.13879	0.00169645	0.0177079
PSMC3IP	ENSG00000131470.10	protein_coding	419.879	-0.353317	0.112678	-3.13563	0.00171485	0.017886
HNRNPM	ENSG00000099783.7	protein_coding	13328.7	-0.227126	0.072459	-3.13455	0.00172121	0.0179238
NUP210	ENSG00000132182.7	protein_coding	635.666	-0.335555	0.107052	-3.1345	0.00172146	0.0179238
IFNAR2	ENSG00000159110.15	protein_coding	376.733	0.349567	0.111529	3.13432	0.00172251	0.0179238
ACAD9	ENSG00000177646.13	protein_coding	1471.93	-0.278821	0.0889655	-3.13403	0.00172423	0.0179277
ATP6V1B2	ENSG00000147416.6	protein_coding	5289.03	-0.218091	0.0696091	-3.13309	0.00172977	0.0179713
RASA4	ENSG00000105808.13	protein_coding	238.847	0.399664	0.127618	3.13173	0.00173781	0.0180267
CNPY4	ENSG00000166997.3	protein_coding	767.883	0.311366	0.099423	3.13173	0.00173781	0.0180267
SIAE	ENSG00000110013.8	protein_coding	1842.06	0.257428	0.0822202	3.13096	0.00174236	0.0180599
RAB3B	ENSG00000169213.6	protein_coding	280.933	-0.396242	0.12664	-3.12888	0.00175474	0.0181741
TCF3	ENSG00000071564.10	protein_coding	5647.82	0.219724	0.070258	3.12739	0.00176365	0.0182522
CDC23	ENSG00000094880.6	protein_coding	2446.81	-0.249567	0.0798528	-3.12534	0.00177601	0.0183658
TRIM65	ENSG00000141569.6	protein_coding	2455.5	0.230683	0.0738342	3.12434	0.00178204	0.0184012
KIF13B	ENSG00000197892.8	protein_coding	2641.77	0.297022	0.0950677	3.12432	0.00178219	0.0184012
DOPEY2	ENSG00000142197.8	protein_coding	1542.58	0.286104	0.0916044	3.12326	0.0017886	0.0184352
SCLT1	ENSG00000151466.7	protein_coding	635.315	-0.315885	0.101145	-3.12309	0.00178962	0.0184352
NEAT1	ENSG00000245532.4	lincRNA	22102.2	0.273348	0.0875222	3.12318	0.00178907	0.0184352
SLCO4A1	ENSG00000101187.11	protein_coding	20183.4	0.248883	0.0797069	3.12248	0.00179335	0.0184593
SNX15	ENSG00000110025.8	protein_coding	156.045	0.450144	0.14419	3.12188	0.00179702	0.0184596
PDZD2	ENSG00000133401.11	protein_coding	282.066	-0.414684	0.132826	-3.12201	0.00179621	0.0184596
CXorf61	ENSG00000204019.4	protein_coding	166.235	-0.446092	0.142896	-3.12179	0.00179753	0.0184596
NLGN2	ENSG00000169992.5	protein_coding	5450.42	0.258123	0.0826985	3.12125	0.00180086	0.0184653
ZNF519	ENSG00000175322.7	protein_coding	59.3208	-0.510148	0.163436	-3.12139	0.00179999	0.0184653
PTPRS	ENSG00000105426.10	protein_coding	10254.9	0.261013	0.0836435	3.12054	0.00180518	0.0184886
MPP3	ENSG00000161647.14	protein_coding	786.689	0.328167	0.105167	3.12043	0.00180589	0.0184886
TMBIM6	ENSG00000139644.8	protein_coding	33735.9	-0.201216	0.0644883	-3.12019	0.00180732	0.018489
PCED1A	ENSG00000132635.12	protein_coding	2532.51	0.310927	0.0996649	3.11973	0.0018102	0.0184901
DCK	ENSG00000156136.5	protein_coding	819.873	-0.322701	0.103435	-3.11983	0.00180953	0.0184901
FAM111A	ENSG00000166801.11	protein_coding	2178.17	-0.246856	0.0791545	-3.11866	0.00181674	0.0185428
S100A2	ENSG00000196754.6	protein_coding	1088.5	0.392232	0.125787	3.11822	0.00181948	0.0185565
MEF2A	ENSG00000068305.13	protein_coding	4645.58	0.2624	0.0841973	3.11649	0.00183017	0.0186228
MIB1	ENSG00000101752.7	protein_coding	4321.75	0.278418	0.089324	3.11694	0.00182738	0.0186228
TMEM170B	ENSG00000205269.4	protein_coding	487.528	0.385418	0.123666	3.11661	0.00182946	0.0186228
LCP1	ENSG00000136167.9	protein_coding	271.017	-0.404944	0.12998	-3.11544	0.0018367	0.0186749
MEGF9	ENSG00000106780.7	protein_coding	2142.88	-0.244457	0.0785008	-3.11407	0.00184525	0.0187477
RNF168	ENSG00000163961.4	protein_coding	2566.57	-0.25397	0.0816459	-3.11063	0.00186688	0.018953
B4GALNT4	ENSG00000182272.7	protein_coding	643.941	0.320561	0.103092	3.10947	0.00187421	0.0190129
BCAT2	ENSG00000105552.10	protein_coding	2004.14	0.285756	0.0919563	3.10752	0.00188662	0.0191242
SPINT1	ENSG00000166145.10	protein_coding	1694.14	0.24466	0.0787645	3.10622	0.00189498	0.0191944
CNOT1	ENSG00000125107.12	protein_coding	12308.4	-0.236304	0.0760881	-3.10566	0.00189852	0.0192157
IRF2BPL	ENSG00000119669.3	protein_coding	6597.47	0.249684	0.08044	3.10398	0.00190934	0.0193105
AKAP8	ENSG00000105127.4	protein_coding	3257.1	0.227388	0.0732721	3.10334	0.00191352	0.0193381
SGMS2	ENSG00000164023.10	protein_coding	1760.88	-0.263275	0.0848622	-3.10239	0.00191965	0.0193855
PGM2	ENSG00000169299.9	protein_coding	1389.61	-0.261863	0.0844359	-3.10133	0.00192657	0.0194405
KDM1A	ENSG00000004487.11	protein_coding	5782.74	0.214742	0.0692546	3.10076	0.00193025	0.0194513
LEO1	ENSG00000166477.8	protein_coding	1552.21	-0.274669	0.0885824	-3.10071	0.00193055	0.0194513
CPS1	ENSG00000021826.10	protein_coding	466.641	0.371464	0.11982	3.10018	0.00193401	0.0194704
ALKBH3	ENSG00000166199.8	protein_coding	924.821	-0.317159	0.102318	-3.09975	0.00193682	0.0194704
TCF4	ENSG00000196628.9	protein_coding	188.417	-0.437964	0.141282	-3.09993	0.00193568	0.0194704
GLUL	ENSG00000135821.12	protein_coding	16031.6	0.211887	0.0683702	3.09911	0.001941	0.0194977
ICAM5	ENSG00000105376.4	protein_coding	1388.14	0.333934	0.107776	3.09841	0.00194561	0.0195293
RDX	ENSG00000137710.10	protein_coding	4197.43	0.266159	0.0859382	3.0971	0.00195425	0.0196013
ZNF93	ENSG00000184635.9	protein_coding	255.679	-0.38853	0.125478	-3.0964	0.00195883	0.0196325
AK2	ENSG00000004455.12	protein_coding	7237.97	-0.229411	0.0741029	-3.09585	0.0019625	0.0196397
ODF3B	ENSG00000177989.9	protein_coding	461.241	0.434503	0.14035	3.09586	0.00196244	0.0196397
PPM1F	ENSG00000100034.9	protein_coding	3968.03	0.216697	0.0700604	3.09301	0.00198137	0.0198137
PER3	ENSG00000049246.10	protein_coding	462.847	-0.331664	0.107261	-3.09211	0.00198741	0.0198592
REEP4	ENSG00000168476.7	protein_coding	1218.15	-0.28375	0.0917805	-3.09161	0.00199071	0.0198773
HEXIM1	ENSG00000186834.2	protein_coding	10438.7	0.207235	0.0670542	3.09056	0.00199779	0.0199331
STPG1	ENSG00000001460.13	protein_coding	728.271	-0.293907	0.0951421	-3.08914	0.0020074	0.020014
METAP2	ENSG00000111142.9	protein_coding	7756.17	-0.221079	0.071638	-3.08606	0.00202831	0.0202073
PTGES	ENSG00000148344.10	protein_coding	4777.99	-0.308592	0.100045	-3.08452	0.00203882	0.0202818
RAP2B	ENSG00000181467.2	protein_coding	3163	0.288058	0.0933878	3.08454	0.0020387	0.0202818
SOX6	ENSG00000110693.11	protein_coding	232.814	0.387831	0.125747	3.08422	0.00204088	0.0202871
RECQL4	ENSG00000160957.8	protein_coding	2134.17	-0.369145	0.119748	-3.08269	0.00205137	0.0203762
ENG	ENSG00000106991.9	protein_coding	1116.54	0.259904	0.0843575	3.08098	0.00206322	0.0204634
RUFY2	ENSG00000204130.8	protein_coding	1162.95	0.300497	0.0975303	3.08107	0.00206261	0.0204634
MT-ATP6	ENSG00000198899.2	protein_coding	216536	-0.254416	0.0825989	-3.08014	0.00206903	0.0205059
PGPEP1	ENSG00000130517.9	protein_coding	6205.18	0.265601	0.0862481	3.0795	0.0020735	0.0205349
CLPP	ENSG00000125656.4	protein_coding	2840.87	0.300569	0.0976434	3.07823	0.00208232	0.0206069
SSX2IP	ENSG00000117155.12	protein_coding	1083.64	-0.266273	0.086539	-3.07691	0.00209156	0.0206831
PPFIA2	ENSG00000139220.12	protein_coding	177.272	0.427213	0.138894	3.07581	0.0020993	0.0207442
ZNF618	ENSG00000157657.10	protein_coding	1601.58	0.311093	0.101202	3.074	0.00211212	0.0208554
CAPS	ENSG00000105519.8	protein_coding	385.791	0.353122	0.114905	3.07316	0.00211806	0.0208832
MT-CYB	ENSG00000198727.2	protein_coding	121414	-0.219667	0.0714774	-3.07324	0.00211746	0.0208832
PAOX	ENSG00000148832.10	protein_coding	422.831	0.332998	0.108527	3.06833	0.00215255	0.0212076
TRIM5	ENSG00000132256.14	protein_coding	1704.83	-0.240595	0.0784337	-3.06749	0.00215862	0.0212516
ZNF404	ENSG00000176222.7	protein_coding	132.938	0.445794	0.145342	3.06721	0.00216065	0.0212559
RARG	ENSG00000172819.12	protein_coding	2104.82	0.248132	0.0809231	3.06626	0.00216752	0.0212922
CDKN2AIPNL	ENSG00000237190.3	protein_coding	1028.23	-0.29964	0.0977181	-3.06637	0.00216678	0.0212922
RPTOR	ENSG00000141564.9	protein_coding	3727.13	0.228389	0.0745055	3.06539	0.00217383	0.0213384
FADS1	ENSG00000149485.12	protein_coding	17519.2	-0.199666	0.0651521	-3.06461	0.00217956	0.021379
TRIOBP	ENSG00000100106.15	protein_coding	1751.14	0.234687	0.0766399	3.06221	0.00219712	0.0215353
TXNIP	ENSG00000117289.7	protein_coding	40361.7	0.236039	0.0771088	3.06111	0.00220518	0.0215982
TOB1	ENSG00000141232.4	protein_coding	1053.05	0.29367	0.0959496	3.06067	0.0022084	0.0215982
VIPR1-AS1	ENSG00000232354.3	antisense	229.996	0.402621	0.131545	3.06071	0.00220811	0.0215982
IL24	ENSG00000162892.11	protein_coding	145.062	-0.461267	0.150752	-3.05978	0.002215	0.0216469
SEMA4D	ENSG00000187764.7	protein_coding	3005.75	0.2655	0.0867996	3.05877	0.00222244	0.0217038
PLLP	ENSG00000102934.5	protein_coding	775.233	-0.346135	0.113196	-3.05783	0.00222946	0.0217564
HYLS1	ENSG00000198331.6	protein_coding	941.292	-0.312915	0.102347	-3.05739	0.00223274	0.0217724
CCDC40	ENSG00000141519.10	protein_coding	399.54	0.3365	0.110091	3.05657	0.00223885	0.0218161
LIMD1	ENSG00000144791.5	protein_coding	4458.05	0.255373	0.0835561	3.05631	0.0022408	0.0218192
MVK	ENSG00000110921.7	protein_coding	2872.44	-0.288177	0.0942991	-3.05599	0.0022432	0.0218266
MMP14	ENSG00000157227.8	protein_coding	108698	0.236254	0.0773228	3.05542	0.00224742	0.0218358
ADM5	ENSG00000224420.3	protein_coding	100.501	-0.491106	0.160728	-3.05551	0.0022468	0.0218358
C4orf46	ENSG00000205208.4	protein_coding	650.19	-0.325472	0.106577	-3.05387	0.00225907	0.021933
PSD4	ENSG00000125637.11	protein_coding	403.169	0.335264	0.109816	3.05295	0.00226606	0.021953
POT1	ENSG00000128513.10	protein_coding	1350.31	-0.259363	0.084952	-3.05306	0.00226524	0.021953
CCDC57	ENSG00000176155.14	protein_coding	3597.53	0.234363	0.0767583	3.05326	0.00226371	0.021953
EIF4E2	ENSG00000135930.9	protein_coding	3564.07	0.222426	0.0729232	3.05014	0.00228735	0.0221431
NCKAP5L	ENSG00000167566.12	protein_coding	1947.06	0.249625	0.08195	3.04606	0.0023186	0.0224294
CCDC61	ENSG00000104983.4	protein_coding	277.252	0.368243	0.12094	3.04484	0.00232804	0.0225044
SPAG1	ENSG00000104450.8	protein_coding	767.945	-0.295577	0.0970898	-3.04437	0.00233168	0.0225233
RNF128	ENSG00000133135.9	protein_coding	437.313	0.359078	0.11796	3.04406	0.00233412	0.0225284
GPR115	ENSG00000153294.7	protein_coding	154.945	-0.429381	0.141064	-3.04387	0.00233559	0.0225284
FERMT2	ENSG00000073712.9	protein_coding	7597.02	-0.218416	0.0717813	-3.04279	0.00234394	0.0225622
ZNF449	ENSG00000173275.8	protein_coding	617.926	0.319191	0.104893	3.04302	0.00234215	0.0225622
EHMT2	ENSG00000204371.7	protein_coding	4324.59	0.217513	0.0714855	3.04276	0.00234417	0.0225622
GPN3	ENSG00000111231.4	protein_coding	1580.35	-0.256845	0.0844554	-3.04119	0.00235643	0.0226638
AVL9	ENSG00000105778.13	protein_coding	2882.85	-0.237261	0.0780306	-3.04061	0.00236097	0.0226911
IL18	ENSG00000150782.7	protein_coding	500.761	-0.366671	0.120634	-3.03953	0.00236947	0.0227565
MICB	ENSG00000204516.5	protein_coding	775.569	-0.284199	0.0935096	-3.03925	0.00237171	0.0227616
PNRC1	ENSG00000146278.10	protein_coding	5723.89	0.298469	0.0982895	3.03663	0.00239239	0.0229271
RP11-440D17.3	ENSG00000272913.1	lincRNA	345.943	0.366392	0.120652	3.03676	0.00239137	0.0229271
SOX12	ENSG00000177732.6	protein_coding	2603.55	0.234319	0.0771943	3.03544	0.00240185	0.0230012
PLAU	ENSG00000122861.11	protein_coding	4495.08	-0.238752	0.0786835	-3.03434	0.00241066	0.0230684
HIRIP3	ENSG00000149929.11	protein_coding	638.426	-0.351157	0.115736	-3.03413	0.00241233	0.0230684
NUP37	ENSG00000075188.4	protein_coding	1009.36	-0.301609	0.0994415	-3.03303	0.00242109	0.0231122
GRPEL2	ENSG00000164284.10	protein_coding	677.702	-0.312553	0.103054	-3.03291	0.00242211	0.0231122
RP11-417E7.1	ENSG00000223485.1	lincRNA	863.75	0.350222	0.115473	3.03295	0.00242176	0.0231122
MICAL1	ENSG00000135596.13	protein_coding	3464.31	0.256754	0.0846744	3.03225	0.00242739	0.0231296
DOK6	ENSG00000206052.6	protein_coding	129.15	0.46555	0.153532	3.03227	0.00242724	0.0231296
SENP1	ENSG00000079387.9	protein_coding	1032.4	-0.266747	0.0880381	-3.02991	0.00244627	0.0232911
NANP	ENSG00000170191.4	protein_coding	600.265	0.303082	0.100044	3.0295	0.00244959	0.0232911
RCC2	ENSG00000179051.9	protein_coding	6803.19	-0.233989	0.0772322	-3.02968	0.00244816	0.0232911
DNAH10OS	ENSG00000250091.2	protein_coding	107.764	0.465666	0.153725	3.02922	0.00245183	0.0232959
AEN	ENSG00000181026.13	protein_coding	864.382	-0.295819	0.097671	-3.02873	0.00245582	0.0233172
HSPA13	ENSG00000155304.4	protein_coding	4890.18	-0.214986	0.0710063	-3.02771	0.00246414	0.0233796
ABI3BP	ENSG00000154175.12	protein_coding	123.376	-0.440241	0.145473	-3.02628	0.00247583	0.0234738
MARK4	ENSG00000007047.10	protein_coding	1955.45	0.230271	0.0761327	3.0246	0.00248966	0.0235881
CENPJ	ENSG00000151849.10	protein_coding	746.964	-0.326924	0.108121	-3.02368	0.0024972	0.0236092
SPRY1	ENSG00000164056.6	protein_coding	3899.8	-0.217525	0.0719365	-3.02384	0.00249584	0.0236092
RP11-381E24.1	ENSG00000241634.1	pseudogene	53.2223	-0.498106	0.164713	-3.02409	0.00249381	0.0236092
IL7R	ENSG00000168685.10	protein_coding	385.857	-0.339541	0.112424	-3.02019	0.00252617	0.0238662
CDK14	ENSG00000058091.12	protein_coding	467.458	0.337617	0.11182	3.01928	0.00253374	0.0239208
PPM1G	ENSG00000115241.9	protein_coding	8384.84	-0.234085	0.07763	-3.01539	0.00256647	0.0242127
RALGDS	ENSG00000160271.10	protein_coding	7773.55	0.209261	0.0694043	3.01509	0.002569	0.0242194
ZBTB42	ENSG00000179627.9	protein_coding	266.25	0.425465	0.141168	3.01389	0.00257918	0.0242982
BCL3	ENSG00000069399.8	protein_coding	3791.06	0.232103	0.077028	3.01322	0.00258488	0.0243208
HLA-DPB1	ENSG00000223865.6	protein_coding	1285.66	0.267955	0.0889277	3.01318	0.00258523	0.0243208
SSBP2	ENSG00000145687.11	protein_coding	1054.48	0.268447	0.0891091	3.01257	0.00259048	0.0243496
CRADD	ENSG00000169372.8	protein_coding	780.985	-0.308338	0.102364	-3.01219	0.00259371	0.0243496
FAM73A	ENSG00000180488.10	protein_coding	1163.07	-0.290463	0.0964294	-3.01218	0.00259377	0.0243496
ACVR2A	ENSG00000121989.10	protein_coding	415.285	0.342667	0.113787	3.0115	0.00259965	0.0243877
KAT5	ENSG00000172977.8	protein_coding	1683.92	0.269964	0.089653	3.01121	0.00260207	0.0243933
DVL2	ENSG00000004975.7	protein_coding	4335.68	0.23106	0.0767466	3.01069	0.00260651	0.0244178
TEAD1	ENSG00000187079.10	protein_coding	11776.5	0.250311	0.0831546	3.01019	0.00261082	0.0244409
HECA	ENSG00000112406.4	protein_coding	1328.04	0.352353	0.117091	3.00922	0.00261917	0.0245019
GGH	ENSG00000137563.7	protein_coding	1721.46	-0.272734	0.0906688	-3.00802	0.00262953	0.0245816
MALL	ENSG00000144063.3	protein_coding	996.039	0.292226	0.097183	3.00696	0.00263871	0.0246501
POLE	ENSG00000177084.12	protein_coding	2092.85	-0.309922	0.103093	-3.00623	0.00264512	0.0246927
HMGN3	ENSG00000118418.10	protein_coding	1949.26	-0.246592	0.0820715	-3.0046	0.00265934	0.0248081
KCTD9	ENSG00000104756.11	protein_coding	2981.35	-0.225935	0.0752702	-3.00166	0.00268514	0.0250313
AJUBA	ENSG00000129474.11	protein_coding	4015.08	-0.218512	0.0728026	-3.00142	0.0026872	0.025033
IQGAP2	ENSG00000145703.11	protein_coding	396.107	0.340837	0.11358	3.00084	0.00269235	0.0250635
MUC5B	ENSG00000117983.13	protein_coding	16620	0.32358	0.107847	3.00035	0.00269668	0.0250863
ALG9	ENSG00000086848.10	protein_coding	599.799	0.296254	0.0987558	2.99987	0.00270098	0.0250913
CCDC102A	ENSG00000135736.5	protein_coding	529.685	0.313041	0.104351	2.99988	0.00270089	0.0250913
VCL	ENSG00000035403.12	protein_coding	19029	-0.227713	0.0759217	-2.99931	0.00270588	0.0251159
PSRC1	ENSG00000134222.12	protein_coding	1223.61	-0.341776	0.113966	-2.99893	0.00270928	0.0251159
PATL1	ENSG00000166889.13	protein_coding	6774.41	-0.211938	0.0706671	-2.99911	0.00270773	0.0251159
PCNP	ENSG00000081154.7	protein_coding	5390.04	-0.216495	0.0722007	-2.99852	0.00271297	0.0251326
BSDC1	ENSG00000160058.14	protein_coding	5907.1	0.203003	0.0677286	2.9973	0.00272385	0.025216
NISCH	ENSG00000010322.11	protein_coding	7381.6	0.211645	0.0706364	2.99626	0.00273312	0.0252842
GRPEL1	ENSG00000109519.8	protein_coding	3163.34	-0.222804	0.0743692	-2.99592	0.00273619	0.0252951
FKBP14	ENSG00000106080.6	protein_coding	1151.96	-0.27835	0.0929385	-2.99499	0.00274454	0.0253547
CAPNS1	ENSG00000126247.6	protein_coding	27945.2	0.217125	0.0725725	2.99184	0.00277299	0.0255998
CH25H	ENSG00000138135.5	protein_coding	191.618	0.41162	0.137598	2.99147	0.00277641	0.0256136
ATAD3A	ENSG00000197785.9	protein_coding	2318.91	-0.273702	0.0915118	-2.9909	0.00278159	0.0256437
ZNF251	ENSG00000198169.4	protein_coding	2621.37	0.266079	0.0890209	2.98895	0.00279935	0.0257896
RCCD1	ENSG00000166965.8	protein_coding	1302.64	-0.284901	0.0953316	-2.98853	0.00280328	0.0258079
SSH1	ENSG00000084112.10	protein_coding	10018.6	0.28306	0.0947925	2.98611	0.00282554	0.0259771
APOL6	ENSG00000221963.5	protein_coding	1556.45	-0.258639	0.0866123	-2.98617	0.00282492	0.0259771
FERMT1	ENSG00000101311.11	protein_coding	1794.39	0.305785	0.102487	2.98363	0.00284848	0.0261699
TEAD3	ENSG00000007866.14	protein_coding	3283.15	0.217316	0.0728743	2.98206	0.00286311	0.0262233
GALC	ENSG00000054983.12	protein_coding	4191.51	-0.221072	0.0741315	-2.98217	0.00286216	0.0262233
HMOX1	ENSG00000100292.12	protein_coding	2049.94	0.350194	0.117434	2.98205	0.00286324	0.0262233
AGO4	ENSG00000134698.10	protein_coding	1384.69	0.304281	0.102034	2.98214	0.00286241	0.0262233
CHUK	ENSG00000213341.6	protein_coding	1712.17	-0.247105	0.0828668	-2.98196	0.00286412	0.0262233
IDE	ENSG00000119912.11	protein_coding	2158.7	-0.254555	0.0853836	-2.98131	0.00287021	0.0262273
STARD8	ENSG00000130052.9	protein_coding	1034.75	-0.282154	0.0946419	-2.98128	0.00287045	0.0262273
JUND	ENSG00000130522.4	protein_coding	7670.71	0.311456	0.104464	2.98148	0.00286859	0.0262273
FAM110B	ENSG00000169122.7	protein_coding	226.809	0.381011	0.127822	2.98079	0.00287507	0.0262515
EPHB6	ENSG00000106123.7	protein_coding	69.1551	-0.487071	0.163418	-2.98053	0.00287752	0.0262559
CST4	ENSG00000101441.4	protein_coding	39770.2	0.290276	0.0974139	2.97982	0.00288421	0.0262989
ADRA1B	ENSG00000170214.3	protein_coding	304.734	0.352863	0.118426	2.9796	0.0028863	0.0263
OTUD6B	ENSG00000155100.6	protein_coding	550.325	-0.291213	0.0977947	-2.9778	0.00290323	0.0264362
USP35	ENSG00000118369.8	protein_coding	1054.45	0.276609	0.0929124	2.9771	0.00290993	0.0264791
RFX7	ENSG00000181827.10	protein_coding	1643.63	-0.261428	0.0878329	-2.97643	0.00291628	0.0265189
DLL4	ENSG00000128917.5	protein_coding	83.1282	0.474567	0.15955	2.9744	0.00293561	0.0266765
SPRED3	ENSG00000188766.8	protein_coding	357.648	0.338715	0.113934	2.97292	0.00294982	0.0267873
PDIA6	ENSG00000143870.8	protein_coding	16934.4	-0.196362	0.0660894	-2.97115	0.00296686	0.0269238
EXOSC8	ENSG00000120699.8	protein_coding	1061.57	-0.272245	0.0916589	-2.9702	0.00297606	0.0269889
RUVBL1	ENSG00000175792.7	protein_coding	2276.83	-0.259837	0.0874898	-2.96991	0.00297889	0.0269962
TSC22D1	ENSG00000102804.10	protein_coding	33523.7	0.227346	0.0765777	2.96882	0.00298943	0.027
HPCAL1	ENSG00000115756.8	protein_coding	27688.9	0.223036	0.0751213	2.96901	0.00298759	0.027
ATP10D	ENSG00000145246.9	protein_coding	3540.66	-0.243807	0.0821073	-2.96937	0.00298414	0.027
BRCC3	ENSG00000185515.10	protein_coding	1667.25	-0.306605	0.103261	-2.96923	0.00298543	0.027
MLLT11	ENSG00000213190.2	protein_coding	297.774	0.358721	0.120819	2.96907	0.00298705	0.027
CDADC1	ENSG00000102543.10	protein_coding	345.996	-0.343427	0.115687	-2.9686	0.00299161	0.0270014
GABRR2	ENSG00000111886.9	protein_coding	535.87	0.348222	0.117329	2.9679	0.00299846	0.0270449
NMNAT2	ENSG00000157064.6	protein_coding	3651.05	0.248686	0.0838454	2.966	0.00301697	0.0271935
ERLIN1	ENSG00000107566.9	protein_coding	3520.49	-0.234771	0.0791849	-2.96484	0.00302841	0.0272601
PSMB2	ENSG00000126067.7	protein_coding	6610.46	-0.239264	0.0807006	-2.96484	0.00302844	0.0272601
C4BPB	ENSG00000123843.8	protein_coding	1186.32	-0.281786	0.0950682	-2.96404	0.00303634	0.0273127
RRP15	ENSG00000067533.5	protein_coding	1146.96	-0.248219	0.0837926	-2.9623	0.00305347	0.0274483
SLC25A37	ENSG00000147454.9	protein_coding	24353.9	0.248983	0.0840859	2.96106	0.00306583	0.0275408
HPS5	ENSG00000110756.13	protein_coding	1596.07	-0.25088	0.0847544	-2.96008	0.00307556	0.0275749
FRMD4B	ENSG00000114541.10	protein_coding	313.357	-0.343015	0.115871	-2.96033	0.00307306	0.0275749
VWA1	ENSG00000179403.10	protein_coding	1621.17	0.317411	0.107231	2.96006	0.00307583	0.0275749
KIAA1598	ENSG00000187164.13	protein_coding	1676.64	-0.242685	0.0820332	-2.95837	0.00309268	0.0277074
ENO2	ENSG00000111674.4	protein_coding	14484.1	0.253688	0.0858586	2.95472	0.00312949	0.0280184
TPR	ENSG00000047410.9	protein_coding	13320.1	-0.226337	0.0766292	-2.95366	0.0031403	0.0280865
ZNF814	ENSG00000204514.5	protein_coding	513.998	0.387571	0.131222	2.95356	0.0031413	0.0280865
CASP2	ENSG00000106144.15	protein_coding	1099.09	-0.267956	0.0907374	-2.95309	0.00314605	0.0281101
RAET1E	ENSG00000164520.7	protein_coding	107.497	-0.439452	0.148877	-2.95178	0.00315953	0.0282116
MPP5	ENSG00000072415.4	protein_coding	3125.25	-0.222091	0.0752694	-2.95061	0.00317143	0.0282989
PDHX	ENSG00000110435.7	protein_coding	1747.11	-0.24294	0.0823526	-2.95	0.0031777	0.028317
MT-ND2	ENSG00000198763.3	protein_coding	139435	-0.232772	0.0789032	-2.9501	0.00317671	0.028317
SESTD1	ENSG00000187231.9	protein_coding	1453.43	0.273964	0.0928834	2.94954	0.00318243	0.0283402
MYSM1	ENSG00000162601.5	protein_coding	452.285	0.350573	0.118866	2.94931	0.00318485	0.0283428
EWSR1	ENSG00000182944.13	protein_coding	12864.2	-0.231613	0.0785994	-2.94675	0.00321129	0.0285591
FAM43A	ENSG00000185112.4	protein_coding	1373.56	-0.267509	0.0908024	-2.94605	0.00321857	0.0286047
PHLDA1	ENSG00000139289.9	protein_coding	31926.2	0.283746	0.0963934	2.94363	0.00324391	0.0287938
NXPE3	ENSG00000144815.10	protein_coding	1642.81	-0.237076	0.0805477	-2.9433	0.00324728	0.0287938
CCBE1	ENSG00000183287.9	protein_coding	208.81	-0.379008	0.128763	-2.94345	0.0032458	0.0287938
NOX5	ENSG00000255346.5	protein_coding	7480.18	0.245094	0.0832748	2.94319	0.00324847	0.0287938
TRAF3IP2	ENSG00000056972.14	protein_coding	1044.63	-0.254828	0.086704	-2.93905	0.00329219	0.0291619
RMI2	ENSG00000175643.7	protein_coding	379.599	-0.318331	0.108399	-2.93665	0.00331776	0.0293464
HNRNPAB	ENSG00000197451.6	protein_coding	7214.19	-0.229826	0.0782654	-2.93649	0.00331945	0.0293464
PRC1	ENSG00000198901.9	protein_coding	3360.76	-0.233198	0.079414	-2.93648	0.00331962	0.0293464
MLLT6	ENSG00000108292.12	protein_coding	9201.84	0.201152	0.06854	2.93481	0.00333748	0.0294746
PSMB7	ENSG00000136930.8	protein_coding	9029.31	-0.242027	0.0824705	-2.93471	0.00333855	0.0294746
MDK	ENSG00000110492.11	protein_coding	2326.7	0.286048	0.0975154	2.93337	0.00335309	0.0295828
CRIM1	ENSG00000150938.5	protein_coding	7934.59	-0.233771	0.0797013	-2.93309	0.0033561	0.0295828
SYNGAP1	ENSG00000197283.8	protein_coding	920.017	0.267122	0.0910758	2.93296	0.00335744	0.0295828
GIPR	ENSG00000010310.4	protein_coding	239.928	0.388426	0.13258	2.92974	0.00339242	0.0298515
VDAC1	ENSG00000213585.6	protein_coding	18196.7	-0.198725	0.0678259	-2.92993	0.00339036	0.0298515
RAB4A	ENSG00000168118.7	protein_coding	1273.37	0.282031	0.096272	2.92953	0.00339477	0.0298525
CDK5	ENSG00000164885.8	protein_coding	1566.43	0.246058	0.0840102	2.9289	0.0034016	0.0298928
AKAP6	ENSG00000151320.6	protein_coding	420.273	-0.334563	0.114295	-2.92719	0.00342044	0.0300386
TBC1D16	ENSG00000167291.11	protein_coding	5213.35	0.250477	0.0855805	2.9268	0.00342471	0.0300563
NEIL1	ENSG00000140398.9	protein_coding	859.886	0.321361	0.109816	2.92637	0.00342946	0.0300783
PEX12	ENSG00000108733.5	protein_coding	551.894	0.293736	0.1004	2.92566	0.00343726	0.0301269
RAB14	ENSG00000119396.6	protein_coding	4612.79	0.272348	0.0931121	2.92495	0.0034451	0.0301757
R3HDM2	ENSG00000179912.15	protein_coding	1043.66	0.283933	0.0970815	2.92468	0.00344806	0.0301818
KDELC2	ENSG00000178202.8	protein_coding	1971.54	0.220273	0.0753215	2.92444	0.00345081	0.0301861
KCNH8	ENSG00000183960.4	protein_coding	119.619	0.430286	0.147148	2.92417	0.00345377	0.0301922
ARVCF	ENSG00000099889.9	protein_coding	614.497	0.315096	0.107813	2.92261	0.00347115	0.0303044
CXCL1	ENSG00000163739.4	protein_coding	9634.01	0.226702	0.0775667	2.92268	0.00347035	0.0303044
RP11-480I12.5	ENSG00000214796.4	pseudogene	60.9782	-0.472487	0.161754	-2.92103	0.00348876	0.0304383
TCAP	ENSG00000173991.5	protein_coding	236.641	0.379454	0.130003	2.91881	0.00351368	0.0306356
MIS18A	ENSG00000159055.3	protein_coding	382.214	-0.336779	0.115516	-2.91544	0.00355185	0.0309482
HAUS8	ENSG00000131351.10	protein_coding	929.043	-0.319142	0.10953	-2.91375	0.00357119	0.0310964
MESDC1	ENSG00000140406.2	protein_coding	1008.77	-0.29727	0.102074	-2.91231	0.00358771	0.0312199
CENPO	ENSG00000138092.6	protein_coding	916.425	-0.300249	0.10315	-2.9108	0.00360499	0.0313498
IGF2BP2	ENSG00000073792.11	protein_coding	3725.56	-0.22006	0.0756126	-2.91036	0.00361014	0.0313742
EHD3	ENSG00000013016.10	protein_coding	539.692	0.301685	0.103692	2.90943	0.00362083	0.0314466
FANCG	ENSG00000221829.5	protein_coding	1614.98	-0.302075	0.103859	-2.90851	0.00363158	0.0315194
NCL	ENSG00000115053.11	protein_coding	29163.8	-0.208354	0.0716664	-2.90727	0.00364597	0.0316237
PTPRCAP	ENSG00000213402.2	protein_coding	133.098	-0.426829	0.146863	-2.9063	0.00365734	0.0317017
RBM3	ENSG00000102317.13	protein_coding	12881.8	-0.202792	0.0698168	-2.90463	0.00367689	0.0318505
SNTA1	ENSG00000101400.5	protein_coding	702.553	0.304197	0.104743	2.90423	0.00368153	0.03187
KDM4B	ENSG00000127663.10	protein_coding	5884.09	0.227066	0.0781967	2.90378	0.00368685	0.0318831
ABL2	ENSG00000143322.15	protein_coding	5986.32	-0.233622	0.0804566	-2.9037	0.00368783	0.0318831
CAMK1D	ENSG00000183049.8	protein_coding	3432.64	0.2449	0.0843522	2.9033	0.00369255	0.0319033
IRAK1	ENSG00000184216.7	protein_coding	9481.47	-0.212113	0.0730824	-2.90238	0.00370338	0.0319761
AC004381.6	ENSG00000005189.15	protein_coding	102.803	-0.45075	0.155338	-2.90173	0.00371111	0.0320221
CDC7	ENSG00000097046.8	protein_coding	931.36	-0.289201	0.099687	-2.90109	0.00371872	0.0320671
ARHGEF28	ENSG00000214944.5	protein_coding	4675.13	-0.211841	0.0730271	-2.90085	0.0037215	0.0320703
PVR	ENSG00000073008.10	protein_coding	4367.28	-0.204249	0.0704234	-2.90031	0.00372799	0.0321055
VAT1L	ENSG00000171724.2	protein_coding	161.544	0.412542	0.142258	2.89996	0.00373209	0.0321201
MARS	ENSG00000166986.8	protein_coding	5993.93	-0.264552	0.0912967	-2.89771	0.00375896	0.0323304
SRP72	ENSG00000174780.11	protein_coding	9602.74	-0.191376	0.0660492	-2.89748	0.00376173	0.0323335
NIPAL3	ENSG00000001461.12	protein_coding	3627.05	-0.237641	0.0820386	-2.8967	0.00377112	0.0323933
ANKRD44	ENSG00000065413.12	protein_coding	532.573	0.326697	0.112812	2.89595	0.00378013	0.0324289
CTB-175P5.4	ENSG00000269416.1	lincRNA	142.983	-0.452942	0.156403	-2.89599	0.00377963	0.0324289
NANS	ENSG00000095380.10	protein_coding	2582.34	-0.224128	0.0774003	-2.89569	0.0037832	0.0324344
SPAG4	ENSG00000061656.5	protein_coding	2546.9	0.295532	0.102157	2.89291	0.00381693	0.0327025
PKD1	ENSG00000008710.13	protein_coding	5394.01	0.225475	0.0780374	2.88932	0.00386074	0.0330566
DNAJB5	ENSG00000137094.10	protein_coding	1059.54	0.256739	0.0888868	2.88838	0.00387232	0.0331346
ASAH1	ENSG00000104763.13	protein_coding	4763.24	-0.213776	0.0740218	-2.88802	0.00387681	0.0331517
ST7	ENSG00000004866.14	protein_coding	782.389	-0.269079	0.0931883	-2.88747	0.00388351	0.0331877
FOXRED2	ENSG00000100350.10	protein_coding	1008.8	-0.271422	0.0940368	-2.88634	0.00389755	0.033234
KIAA1522	ENSG00000162522.6	protein_coding	1372.83	0.245108	0.0849093	2.88671	0.00389298	0.033234
SYNE3	ENSG00000176438.8	protein_coding	824.953	0.266711	0.0924083	2.88623	0.0038989	0.033234
GTF2H5	ENSG00000272047.1	protein_coding	1794.23	-0.248755	0.0861841	-2.88632	0.00389773	0.033234
GEN1	ENSG00000178295.10	protein_coding	787.008	-0.274466	0.0951365	-2.88497	0.00391448	0.0333456
TRAP1	ENSG00000126602.6	protein_coding	1182.31	-0.275658	0.0955797	-2.88407	0.00392573	0.0334201
RGAG4	ENSG00000242732.3	protein_coding	1021.64	0.279422	0.0969512	2.88209	0.00395046	0.0336091
SEMA3C	ENSG00000075223.9	protein_coding	6436.81	-0.20857	0.0723995	-2.88082	0.00396647	0.0337023
CDKN1C	ENSG00000129757.8	protein_coding	858.463	0.300854	0.10443	2.88091	0.00396531	0.0337023
ZFR	ENSG00000056097.11	protein_coding	9407.01	0.215078	0.074674	2.88023	0.0039739	0.0337225
PDLIM4	ENSG00000131435.8	protein_coding	1853.89	0.2987	0.103706	2.88025	0.00397359	0.0337225
C5orf42	ENSG00000197603.9	protein_coding	1302.58	0.264592	0.091887	2.87953	0.00398265	0.0337753
THBD	ENSG00000178726.6	protein_coding	8643.1	-0.24624	0.0855256	-2.87914	0.00398765	0.0337962
MTFP1	ENSG00000242114.1	protein_coding	121.176	0.431079	0.149806	2.87757	0.00400745	0.0339424
RPN2	ENSG00000118705.12	protein_coding	34063.4	-0.199227	0.0692528	-2.8768	0.00401725	0.0339823
MCU	ENSG00000156026.10	protein_coding	1258.55	-0.234789	0.0816133	-2.87685	0.00401665	0.0339823
SEC24A	ENSG00000113615.8	protein_coding	2526.59	0.288841	0.100463	2.8751	0.00403902	0.0341448
CISH	ENSG00000114737.11	protein_coding	77.3786	0.462611	0.160952	2.87421	0.00405039	0.0341948
ACSL3	ENSG00000123983.9	protein_coding	8927.67	-0.206493	0.0718529	-2.87384	0.00405519	0.0341948
ORC3	ENSG00000135336.10	protein_coding	1957.56	-0.244756	0.0851614	-2.87403	0.00405273	0.0341948
AIM2	ENSG00000163568.9	protein_coding	871.067	0.261758	0.0910673	2.87434	0.00404876	0.0341948
SMAD3	ENSG00000166949.11	protein_coding	13328.9	-0.210272	0.0731792	-2.87338	0.00406105	0.0342226
DNM1	ENSG00000106976.14	protein_coding	729.754	0.29598	0.103035	2.87261	0.00407093	0.0342843
CENPL	ENSG00000120334.11	protein_coding	595.305	-0.295207	0.102798	-2.87171	0.00408259	0.0343608
PAPLN	ENSG00000100767.11	protein_coding	485.738	0.298349	0.103913	2.87114	0.00408993	0.0344008
DDX23	ENSG00000174243.5	protein_coding	4177.18	-0.230937	0.0804564	-2.87033	0.0041004	0.0344672
PNRC2	ENSG00000189266.7	protein_coding	5271.93	-0.200315	0.0698031	-2.86971	0.00410849	0.0345133
GOT1	ENSG00000120053.9	protein_coding	2792.89	-0.246535	0.0859822	-2.86727	0.00414024	0.0347145
TIMM17B	ENSG00000126768.8	protein_coding	2031.53	0.326752	0.113955	2.86739	0.00413879	0.0347145
PTCHD3P1	ENSG00000224597.5	antisense	1194.24	0.244636	0.0853194	2.86729	0.00413999	0.0347145
FBXO45	ENSG00000174013.7	protein_coding	1488.17	-0.233542	0.0815161	-2.86498	0.00417032	0.0349447
GNB4	ENSG00000114450.5	protein_coding	1394.48	-0.23953	0.0836587	-2.86318	0.00419415	0.0351046
MYCT1	ENSG00000120279.6	protein_coding	108.224	-0.445749	0.155696	-2.86294	0.00419725	0.0351046
TUBGCP6	ENSG00000128159.7	protein_coding	2468.91	0.245264	0.0856763	2.86268	0.00420071	0.0351046
NARS	ENSG00000134440.7	protein_coding	6833.55	-0.205107	0.071662	-2.86215	0.00420781	0.0351046
SS18	ENSG00000141380.9	protein_coding	5633.13	0.219681	0.0767537	2.86215	0.0042078	0.0351046
ITGB3BP	ENSG00000142856.12	protein_coding	648.146	-0.322855	0.112778	-2.86275	0.00419987	0.0351046
PRDM8	ENSG00000152784.11	protein_coding	2872.81	-0.217542	0.0760057	-2.86219	0.0042073	0.0351046
NRCAM	ENSG00000091129.15	protein_coding	106.329	0.445374	0.155714	2.86021	0.00423356	0.0352832
PGD	ENSG00000142657.16	protein_coding	12945.3	-0.218051	0.0762378	-2.86014	0.00423451	0.0352832
AC005077.14	ENSG00000230882.1	pseudogene	820.003	-0.287032	0.10038	-2.85946	0.00424367	0.0353365
RP11-160O5.1	ENSG00000263470.1	lincRNA	140.641	0.43102	0.150745	2.85927	0.00424621	0.0353365
RNF215	ENSG00000099999.10	protein_coding	1465.53	0.269665	0.0943331	2.85865	0.0042545	0.0353614
TMEM245	ENSG00000106771.8	protein_coding	6529.13	-0.218845	0.0765532	-2.85873	0.00425345	0.0353614
ZMAT2	ENSG00000146007.6	protein_coding	4899.94	-0.215129	0.0752662	-2.85824	0.00426004	0.0353854
ZBTB46	ENSG00000130584.6	protein_coding	369.548	0.333703	0.116799	2.85707	0.00427576	0.0354808
PARP8	ENSG00000151883.12	protein_coding	2036.07	0.236081	0.0826385	2.85679	0.00427951	0.0354808
RN7SL2	ENSG00000265150.1	misc_RNA	542.018	0.415825	0.145548	2.85696	0.00427717	0.0354808
CSPG4	ENSG00000173546.7	protein_coding	1636.39	0.277289	0.0970836	2.85619	0.00428757	0.0355256
BRMS1L	ENSG00000100916.9	protein_coding	738.934	0.2935	0.102807	2.85487	0.00430548	0.0356518
MAST3	ENSG00000099308.6	protein_coding	1254.41	0.273786	0.0959725	2.85276	0.00433416	0.0358067
GFPT2	ENSG00000131459.8	protein_coding	7881.11	-0.200708	0.0703573	-2.8527	0.00433492	0.0358067
C18orf8	ENSG00000141452.5	protein_coding	1466.63	0.236826	0.0830055	2.85314	0.00432892	0.0358067
ARHGAP18	ENSG00000146376.6	protein_coding	2608.73	-0.212188	0.0743772	-2.85286	0.00433279	0.0358067
MAP4K4	ENSG00000071054.11	protein_coding	29399	-0.203185	0.0712525	-2.85162	0.00434966	0.0359062
PNO1	ENSG00000115946.3	protein_coding	1129.35	-0.255632	0.08968	-2.85048	0.00436528	0.0360129
CCDC18	ENSG00000122483.13	protein_coding	471.737	-0.330791	0.116059	-2.8502	0.0043692	0.0360229
SEH1L	ENSG00000085415.11	protein_coding	3286.51	-0.203213	0.0713254	-2.84909	0.0043844	0.0361259
C21orf58	ENSG00000160298.13	protein_coding	218.364	-0.385595	0.135364	-2.84858	0.00439146	0.0361395
SFXN1	ENSG00000164466.8	protein_coding	3445.54	-0.217734	0.0764313	-2.84875	0.00438914	0.0361395
BUD13	ENSG00000137656.7	protein_coding	1623.4	-0.243148	0.085407	-2.84693	0.00441426	0.0362984
LSS	ENSG00000160285.10	protein_coding	9636.33	-0.22326	0.0784249	-2.84679	0.00441621	0.0362984
BLOC1S6	ENSG00000104164.6	protein_coding	1903.88	-0.230303	0.0809173	-2.84615	0.00442509	0.0363111
LDHB	ENSG00000111716.8	protein_coding	20966.8	-0.22985	0.0807641	-2.84594	0.004428	0.0363111
PHLDB2	ENSG00000144824.15	protein_coding	1609.15	-0.233459	0.0820334	-2.8459	0.00442865	0.0363111
CCT6A	ENSG00000146731.6	protein_coding	17015.8	-0.193391	0.067948	-2.84615	0.00442508	0.0363111
NOLC1	ENSG00000166197.12	protein_coding	8234.89	-0.195485	0.0687149	-2.84487	0.00444292	0.0364057
SUCLG1	ENSG00000163541.7	protein_coding	2317.68	0.217161	0.0763938	2.84265	0.00447405	0.0366383
MFAP1	ENSG00000140259.6	protein_coding	2192.14	-0.214399	0.0754333	-2.84223	0.0044799	0.0366638
MAMLD1	ENSG00000013619.9	protein_coding	2541.27	-0.239208	0.0841721	-2.84189	0.00448465	0.0366801
CCDC47	ENSG00000108588.9	protein_coding	5968.89	-0.191387	0.0673621	-2.84117	0.0044949	0.0367321
BLZF1	ENSG00000117475.9	protein_coding	1744.79	0.237123	0.083463	2.84105	0.00449651	0.0367321
2011-09-01	ENSG00000138758.7	protein_coding	9799.84	-0.193274	0.0680339	-2.84085	0.00449929	0.0367323
EPRS	ENSG00000136628.13	protein_coding	10584.4	-0.19361	0.0681588	-2.84058	0.00450321	0.0367418
NCF2	ENSG00000116701.10	protein_coding	428.082	-0.328404	0.115674	-2.83904	0.00452497	0.0368967
DMBT1	ENSG00000187908.11	protein_coding	1205.18	-0.265344	0.0934835	-2.8384	0.00453401	0.0369479
C5orf22	ENSG00000082213.13	protein_coding	1323.97	-0.236169	0.0832662	-2.83631	0.00456383	0.0371476
RAD51B	ENSG00000182185.14	protein_coding	218.999	-0.372027	0.131167	-2.83629	0.00456408	0.0371476
MLKL	ENSG00000168404.8	protein_coding	1910.24	-0.251787	0.0888225	-2.83472	0.00458656	0.0373034
SLC20A2	ENSG00000168575.5	protein_coding	1216.42	-0.270202	0.0953238	-2.83456	0.00458883	0.0373034
ARTN	ENSG00000117407.12	protein_coding	472.132	0.327574	0.11558	2.83418	0.00459428	0.0373251
FADS2	ENSG00000134824.9	protein_coding	25959.2	-0.216543	0.0764276	-2.83331	0.00460688	0.0373818
MYO1F	ENSG00000142347.12	protein_coding	658.082	0.269981	0.0952836	2.83345	0.00460491	0.0373818
HEMK1	ENSG00000114735.5	protein_coding	1294.32	0.261179	0.0922416	2.83146	0.00463357	0.0375755
GDE1	ENSG00000006007.7	protein_coding	4237.59	-0.215416	0.0760872	-2.83118	0.0046377	0.0375862
PLAT	ENSG00000104368.13	protein_coding	27893.4	0.246995	0.0872831	2.82981	0.00465757	0.0377243
TMEM115	ENSG00000126062.3	protein_coding	2549.02	0.271026	0.0957848	2.82953	0.00466157	0.0377338
BBC3	ENSG00000105327.11	protein_coding	695.714	0.330905	0.116959	2.82924	0.0046659	0.037746
G3BP1	ENSG00000145907.10	protein_coding	10868.2	-0.198055	0.0700126	-2.82885	0.00467157	0.037746
CEP78	ENSG00000148019.8	protein_coding	1107.69	-0.24793	0.0876381	-2.82902	0.00466905	0.037746
OXCT1	ENSG00000083720.8	protein_coding	611.778	-0.289568	0.102396	-2.82793	0.00468494	0.0378312
CAMK1G	ENSG00000008118.5	protein_coding	120.668	0.423948	0.149946	2.82734	0.00469366	0.0378542
ANKRD10	ENSG00000088448.10	protein_coding	2414.22	0.221835	0.0784657	2.82716	0.0046963	0.0378542
STS	ENSG00000101846.6	protein_coding	1044.11	-0.268746	0.0950505	-2.82741	0.00469268	0.0378542
CCL20	ENSG00000115009.7	protein_coding	955.777	-0.341717	0.120967	-2.82489	0.00472973	0.0381006
SNX5	ENSG00000089006.12	protein_coding	3689.79	-0.242509	0.0858712	-2.8241	0.00474135	0.0381712
MT-ND4	ENSG00000198886.2	protein_coding	430217	-0.246598	0.0873372	-2.82351	0.00475003	0.038218
C11orf35	ENSG00000185522.4	protein_coding	428.246	0.376052	0.133208	2.82303	0.00475714	0.038231
CCDC163P	ENSG00000236624.4	protein_coding	120.724	-0.412642	0.146171	-2.82302	0.00475738	0.038231
CHPF2	ENSG00000033100.10	protein_coding	6712.25	0.188578	0.0668076	2.82271	0.00476203	0.0382453
DUSP4	ENSG00000120875.4	protein_coding	58429.3	0.189322	0.0670799	2.82233	0.00476762	0.0382672
PDK3	ENSG00000067992.8	protein_coding	346.333	0.332375	0.117781	2.82198	0.00477275	0.0382853
GTPBP4	ENSG00000107937.14	protein_coding	4783.4	-0.205724	0.0729514	-2.82002	0.00480214	0.0384979
SPON2	ENSG00000159674.7	protein_coding	118.253	0.444093	0.157495	2.81972	0.0048065	0.0385097
PA2G4	ENSG00000170515.9	protein_coding	3883.61	-0.236337	0.0838587	-2.81828	0.00482819	0.0386603
RIMS3	ENSG00000117016.5	protein_coding	183.212	0.379647	0.134817	2.81602	0.00486233	0.0389103
FN1	ENSG00000115414.14	protein_coding	288286	0.247652	0.0879653	2.81533	0.00487267	0.0389697
CTSS	ENSG00000163131.6	protein_coding	2165.97	-0.228612	0.0812179	-2.8148	0.00488074	0.0390108
C9orf40	ENSG00000135045.6	protein_coding	785.369	-0.288557	0.102522	-2.81459	0.00488391	0.0390128
MAU2	ENSG00000129933.16	protein_coding	4453.34	0.195426	0.0694428	2.8142	0.00488994	0.0390376
DGKQ	ENSG00000145214.9	protein_coding	1641.73	0.249319	0.0886052	2.81382	0.00489561	0.0390595
RP11-412H8.2	ENSG00000258175.1	lincRNA	66.6403	0.460528	0.163934	2.80923	0.00496607	0.039598
AHSA2	ENSG00000173209.18	protein_coding	1631.29	0.245021	0.0872352	2.80874	0.00497358	0.0396342
TBC1D10A	ENSG00000099992.11	protein_coding	755.812	0.27852	0.0992723	2.80562	0.00502197	0.0399959
WDR53	ENSG00000185798.6	protein_coding	628.474	-0.277744	0.0990172	-2.80501	0.00503157	0.0400484
ZNF286A	ENSG00000187607.11	protein_coding	407.868	0.330793	0.118016	2.80294	0.00506393	0.040258
C15orf62	ENSG00000188277.8	protein_coding	182.689	0.371733	0.132621	2.80298	0.00506334	0.040258
EI24	ENSG00000149547.10	protein_coding	7208.12	-0.200054	0.0713953	-2.80207	0.00507765	0.040271
MGAT4B	ENSG00000161013.12	protein_coding	13124.7	0.191668	0.0683895	2.80259	0.00506936	0.040271
UBB	ENSG00000170315.9	protein_coding	14038.9	-0.28051	0.100107	-2.8021	0.00507713	0.040271
OPA1	ENSG00000198836.4	protein_coding	4940.54	-0.195635	0.0698129	-2.80228	0.00507425	0.040271
PPP5C	ENSG00000011485.10	protein_coding	3785.4	-0.229884	0.0820477	-2.80184	0.00508121	0.0402753
CNIH4	ENSG00000143771.7	protein_coding	3882.17	0.218076	0.0778407	2.80156	0.0050856	0.0402861
PTBP1	ENSG00000011304.12	protein_coding	16426.6	-0.191757	0.0684592	-2.80103	0.00509391	0.040328
DACT2	ENSG00000164488.7	protein_coding	84.0049	-0.445397	0.159023	-2.80084	0.00509698	0.0403284
PTK2	ENSG00000169398.15	protein_coding	12964.1	-0.187472	0.0669403	-2.80059	0.00510098	0.0403361
RP11-24F11.2	ENSG00000223552.1	antisense	124.73	-0.408209	0.145779	-2.8002	0.00510709	0.0403605
MAN2B2	ENSG00000013288.4	protein_coding	6665.58	0.193763	0.0692486	2.79807	0.00514086	0.04059
CRIP2	ENSG00000182809.6	protein_coding	2610.59	0.294892	0.105394	2.79799	0.00514221	0.04059
MSLN	ENSG00000102854.10	protein_coding	3704.61	0.276548	0.098852	2.7976	0.00514838	0.0405906
SNRPA1	ENSG00000131876.12	protein_coding	1732.17	-0.240012	0.0857898	-2.79768	0.00514709	0.0405906
CCDC9	ENSG00000105321.8	protein_coding	1418.91	0.2623	0.0937684	2.79732	0.00515292	0.0406024
EHBP1L1	ENSG00000173442.7	protein_coding	13421.2	0.210862	0.0754265	2.7956	0.00518039	0.0407948
NME3	ENSG00000103024.3	protein_coding	1199.53	0.303712	0.108656	2.79517	0.00518719	0.0408002
RCAN1	ENSG00000159200.13	protein_coding	1636.27	-0.248011	0.0887267	-2.79522	0.00518638	0.0408002
SELENBP1	ENSG00000143416.16	protein_coding	888.395	0.276624	0.0989831	2.79466	0.00519539	0.0408167
MT-CO2	ENSG00000198712.1	protein_coding	373065	-0.213326	0.0763334	-2.79466	0.00519541	0.0408167
MORC2	ENSG00000133422.8	protein_coding	3167.53	0.221622	0.0793181	2.7941	0.00520447	0.0408638
RRAGC	ENSG00000116954.7	protein_coding	2791.72	0.257605	0.0922338	2.79295	0.0052229	0.0409362
ITGA10	ENSG00000143127.8	protein_coding	11182	0.227633	0.0814981	2.79311	0.00522046	0.0409362
JMY	ENSG00000152409.8	protein_coding	1771.02	0.270506	0.0968415	2.79328	0.00521758	0.0409362
UBR7	ENSG00000012963.9	protein_coding	2314.72	-0.236425	0.084687	-2.79175	0.00524237	0.0410647
UTRN	ENSG00000152818.14	protein_coding	5202.25	-0.248228	0.0889212	-2.79155	0.00524559	0.0410658
LARS	ENSG00000133706.13	protein_coding	9412.52	-0.194801	0.069806	-2.79061	0.00526092	0.0411617
LHPP	ENSG00000107902.9	protein_coding	938.238	0.258078	0.0925996	2.78703	0.00531939	0.0415948
FAM168A	ENSG00000054965.6	protein_coding	6538.09	0.225427	0.0808958	2.78663	0.00532587	0.0416211
C17orf104	ENSG00000180336.13	protein_coding	76.0948	0.444381	0.159522	2.7857	0.00534121	0.0417165
BEND3	ENSG00000178409.9	protein_coding	5538.41	0.232817	0.0835885	2.78528	0.0053482	0.0417466
GLIS3	ENSG00000107249.17	protein_coding	844.604	0.286822	0.103017	2.78423	0.0053655	0.0418572
FBXL13	ENSG00000161040.12	protein_coding	169.786	-0.373046	0.133997	-2.78399	0.00536945	0.0418635
CCNG1	ENSG00000113328.14	protein_coding	2787.29	-0.236687	0.085063	-2.78249	0.00539431	0.0419706
GPRIN1	ENSG00000169258.6	protein_coding	1075	0.235327	0.0845768	2.7824	0.00539577	0.0419706
CTD-2369P2.2	ENSG00000175898.4	lincRNA	166.05	0.381451	0.137079	2.78271	0.00539072	0.0419706
ZNF658	ENSG00000196409.7	protein_coding	190.422	0.367843	0.132181	2.78287	0.00538807	0.0419706
RPA2	ENSG00000117748.5	protein_coding	3406.73	-0.250751	0.09015	-2.78149	0.00541102	0.0420647
NOP16	ENSG00000048162.15	protein_coding	983.568	-0.291577	0.104858	-2.78069	0.00542436	0.0421118
HMG20B	ENSG00000064961.14	protein_coding	6397.41	0.249548	0.089744	2.78067	0.00542467	0.0421118
DKFZP761J1410	ENSG00000105520.6	protein_coding	3553.58	0.218748	0.078676	2.78037	0.0054297	0.0421118
IPO9	ENSG00000198700.5	protein_coding	7270.18	-0.208304	0.0749171	-2.78046	0.00542821	0.0421118
ZNF215	ENSG00000149054.10	protein_coding	392.521	-0.316051	0.11368	-2.78017	0.00543301	0.0421129
MIPEP	ENSG00000027001.7	protein_coding	660.982	-0.262144	0.0942978	-2.77996	0.0054366	0.0421163
ST6GALNAC6	ENSG00000160408.10	protein_coding	4389.87	0.217342	0.0782122	2.77888	0.0054547	0.042232
MRAS	ENSG00000158186.8	protein_coding	647.603	0.264329	0.0951489	2.77805	0.0054686	0.042315
CST7	ENSG00000077984.4	protein_coding	166.386	0.401528	0.144571	2.77738	0.00547985	0.0423284
CTD-3193O13.9	ENSG00000183248.7	protein_coding	102.58	0.421237	0.151656	2.77758	0.00547661	0.0423284
ZNF579	ENSG00000218891.2	protein_coding	885.551	0.333843	0.120193	2.77755	0.00547703	0.0423284
TACC1	ENSG00000147526.15	protein_coding	5967.26	-0.206039	0.074207	-2.77655	0.00549395	0.0423882
RSU1	ENSG00000148484.13	protein_coding	4359.62	-0.217229	0.0782355	-2.7766	0.00549302	0.0423882
PSMD2	ENSG00000175166.12	protein_coding	25732.3	-0.184527	0.0664675	-2.77619	0.00549999	0.0424103
GEMIN6	ENSG00000152147.6	protein_coding	573.658	-0.278233	0.100228	-2.776	0.00550319	0.0424105
MRPL35	ENSG00000132313.10	protein_coding	2098.72	-0.231039	0.0832385	-2.77563	0.00550953	0.0424348
POGLUT1	ENSG00000163389.6	protein_coding	978.064	0.258272	0.0931063	2.77395	0.00553801	0.0426296
DPYSL3	ENSG00000113657.8	protein_coding	847.979	0.257689	0.0929289	2.77297	0.00555471	0.0427335
CYB5RL	ENSG00000215883.5	protein_coding	96.1203	-0.428509	0.154624	-2.7713	0.00558323	0.0429281
DESI1	ENSG00000100418.7	protein_coding	2117.4	-0.213277	0.0769678	-2.77099	0.00558866	0.0429451
FCHO1	ENSG00000130475.10	protein_coding	853.077	0.272382	0.0983493	2.76953	0.00561366	0.0431124
CLIC6	ENSG00000159212.8	protein_coding	954.845	0.251429	0.0908175	2.76851	0.0056314	0.0432238
MAK16	ENSG00000198042.6	protein_coding	624.185	-0.266338	0.0962182	-2.76806	0.00563905	0.0432575
ZNF614	ENSG00000142556.14	protein_coding	765.902	-0.256962	0.0928524	-2.76743	0.0056501	0.0433174
FAM107B	ENSG00000065809.9	protein_coding	12076	-0.22525	0.0814336	-2.76606	0.00567384	0.0434052
PHLPP1	ENSG00000081913.9	protein_coding	1072.34	-0.235819	0.0852385	-2.76657	0.00566487	0.0434052
TRA2A	ENSG00000164548.6	protein_coding	2981.23	-0.206766	0.0747522	-2.76602	0.00567456	0.0434052
BPGM	ENSG00000172331.7	protein_coding	601.833	-0.276884	0.1001	-2.76608	0.00567344	0.0434052
INO80C	ENSG00000153391.11	protein_coding	1108.43	-0.270136	0.0977361	-2.76393	0.005711	0.0436589
BCAS4	ENSG00000124243.13	protein_coding	215.65	0.369874	0.133832	2.76371	0.00571481	0.043663
PEX11A	ENSG00000166821.4	protein_coding	318.062	0.337882	0.122292	2.7629	0.005729	0.0437463
RNF130	ENSG00000113269.9	protein_coding	2578.21	0.206337	0.0747196	2.76148	0.00575393	0.0438614
SLC16A2	ENSG00000147100.5	protein_coding	791.551	0.260619	0.0943747	2.76153	0.00575315	0.0438614
DCLRE1A	ENSG00000198924.3	protein_coding	998.606	-0.272245	0.0985749	-2.76181	0.00574812	0.0438614
CCDC77	ENSG00000120647.5	protein_coding	903.093	-0.271604	0.0984	-2.7602	0.00577651	0.0440084
RHOB	ENSG00000143878.8	protein_coding	5092.47	0.225247	0.0816255	2.75951	0.00578877	0.0440766
LARP4	ENSG00000161813.16	protein_coding	2298.2	-0.211687	0.0767179	-2.75929	0.00579266	0.044081
RAB12	ENSG00000206418.3	protein_coding	1087.42	0.283725	0.102839	2.75893	0.00579902	0.0441043
VMA21	ENSG00000160131.9	protein_coding	1877.76	-0.221032	0.0801244	-2.75861	0.00580475	0.0441227
TMEM45B	ENSG00000151715.3	protein_coding	106.665	-0.417351	0.15133	-2.75788	0.00581772	0.0441961
LBR	ENSG00000143815.10	protein_coding	4102.63	-0.245933	0.0891872	-2.75749	0.00582471	0.0442157
TOX	ENSG00000198846.5	protein_coding	321.825	-0.310371	0.112561	-2.75737	0.00582692	0.0442157
SOX5	ENSG00000134532.11	protein_coding	103.289	0.424597	0.154092	2.75547	0.00586074	0.044447
ARHGAP4	ENSG00000089820.11	protein_coding	110.778	0.425639	0.154481	2.75528	0.00586427	0.0444485
PLAG1	ENSG00000181690.3	protein_coding	745.862	0.328267	0.11915	2.75507	0.005868	0.0444515
H6PD	ENSG00000049239.8	protein_coding	22579.6	0.22364	0.081188	2.75459	0.00587654	0.0444735
CABLES1	ENSG00000134508.8	protein_coding	842.406	0.258021	0.0936713	2.75453	0.00587757	0.0444735
RP11-89K21.1	ENSG00000259439.1	lincRNA	156.632	0.383759	0.139335	2.75422	0.00588323	0.0444911
PRKAR1A	ENSG00000108946.10	protein_coding	11895.4	0.201532	0.0731806	2.75389	0.00588911	0.0445104
RHOQ	ENSG00000119729.6	protein_coding	1444.01	0.270094	0.0981022	2.75319	0.00590181	0.044581
VASH1	ENSG00000071246.6	protein_coding	515.317	0.291831	0.10605	2.75182	0.00592653	0.0447129
COMMD2	ENSG00000114744.4	protein_coding	1141.11	-0.237583	0.0863599	-2.75108	0.00593995	0.0447129
PLCE1	ENSG00000138193.10	protein_coding	506.686	-0.305009	0.110856	-2.75138	0.00593439	0.0447129
MFGE8	ENSG00000140545.10	protein_coding	9886.28	0.210407	0.076491	2.75074	0.00594607	0.0447129
SCCPDH	ENSG00000143653.9	protein_coding	2884.77	-0.213854	0.0777244	-2.75144	0.00593336	0.0447129
HAUS6	ENSG00000147874.6	protein_coding	1552.85	-0.241958	0.087958	-2.75083	0.00594439	0.0447129
PLCD1	ENSG00000187091.9	protein_coding	778.069	0.259215	0.0941905	2.75203	0.00592266	0.0447129
HLA-DRA	ENSG00000204287.9	protein_coding	6403.28	0.213633	0.0776537	2.75109	0.00593967	0.0447129
TFF1	ENSG00000160182.2	protein_coding	133.871	-0.412132	0.149852	-2.75026	0.00595483	0.0447535
TMEM80	ENSG00000177042.10	protein_coding	843.807	0.253708	0.0922594	2.74995	0.00596051	0.044771
ADCK5	ENSG00000173137.7	protein_coding	900.425	0.310951	0.113105	2.74923	0.00597361	0.0448441
CYBRD1	ENSG00000071967.7	protein_coding	5272.7	0.215801	0.0785255	2.74816	0.00599301	0.0449644
SIK1	ENSG00000142178.7	protein_coding	2496.02	0.268273	0.0976456	2.74742	0.00600665	0.0450414
C1orf86	ENSG00000162585.12	protein_coding	1731.63	0.27236	0.0991644	2.74655	0.00602249	0.0451349
RP5-874C20.3	ENSG00000197062.7	pseudogene	1999.6	0.208528	0.0759587	2.74528	0.00604584	0.0452844
DHFRL1	ENSG00000178700.3	protein_coding	299.113	-0.331576	0.120844	-2.74384	0.00607259	0.0454592
SLC1A3	ENSG00000079215.9	protein_coding	199.743	-0.379849	0.138477	-2.74305	0.00608705	0.0455419
DUSP3	ENSG00000108861.4	protein_coding	5811.81	0.184899	0.0674167	2.74263	0.00609499	0.0455758
EIF2B1	ENSG00000111361.8	protein_coding	3534.55	-0.20636	0.0752495	-2.74235	0.00610014	0.0455887
ZMYND11	ENSG00000015171.14	protein_coding	4212.93	-0.200866	0.0732572	-2.74194	0.00610783	0.0456206
ABCA7	ENSG00000064687.8	protein_coding	2375.52	0.218951	0.0798718	2.74128	0.00612	0.0456604
C4BPA	ENSG00000123838.6	protein_coding	86.7345	-0.441931	0.161213	-2.74129	0.00611981	0.0456604
ANKRD13D	ENSG00000172932.10	protein_coding	2982.21	0.222855	0.0813338	2.74001	0.00614373	0.0458118
APBB1	ENSG00000166313.14	protein_coding	2226.38	0.232132	0.0847282	2.73973	0.00614902	0.0458256
IFT140	ENSG00000187535.9	protein_coding	1941.85	0.230416	0.0841126	2.73938	0.0061556	0.0458491
RFC1	ENSG00000035928.10	protein_coding	4056.79	-0.194559	0.0710369	-2.73885	0.00616553	0.0458583
MTIF2	ENSG00000085760.10	protein_coding	2711.33	-0.212602	0.0776257	-2.73881	0.00616628	0.0458583
IREB2	ENSG00000136381.8	protein_coding	2709.96	-0.212459	0.077575	-2.73876	0.00616714	0.0458583
SDCBP	ENSG00000137575.7	protein_coding	16704.5	-0.182377	0.0666132	-2.73785	0.00618417	0.0459336
ZNF292	ENSG00000188994.8	protein_coding	3156.2	0.249007	0.0909489	2.73788	0.00618362	0.0459336
METRNL	ENSG00000176845.8	protein_coding	593.824	0.324698	0.118628	2.73711	0.0061981	0.0460115
ZXDC	ENSG00000070476.10	protein_coding	1592.9	0.234999	0.0858724	2.73661	0.00620766	0.0460444
MCAM	ENSG00000076706.10	protein_coding	3170.76	-0.213511	0.0780264	-2.7364	0.00621158	0.0460444
ASB8	ENSG00000177981.6	protein_coding	932.288	0.262143	0.0958009	2.73633	0.00621288	0.0460444
LETM2	ENSG00000165046.8	protein_coding	269.786	-0.329403	0.120556	-2.73235	0.00628834	0.0465519
GPR162	ENSG00000250510.3	protein_coding	130.894	0.391284	0.143198	2.73246	0.00628636	0.0465519
UTP14A	ENSG00000156697.8	protein_coding	2214.54	-0.226059	0.0827397	-2.73216	0.00629197	0.0465529
SPRYD3	ENSG00000167778.4	protein_coding	2335.26	-0.243488	0.0891506	-2.7312	0.00631038	0.0466632
PRDX1	ENSG00000117450.9	protein_coding	16939.8	-0.211252	0.0773578	-2.73085	0.00631722	0.0466808
LAMTOR1	ENSG00000149357.5	protein_coding	4626.39	0.2212	0.0810044	2.73071	0.00631975	0.0466808
BTN3A2	ENSG00000186470.9	protein_coding	4060.57	-0.211214	0.0774187	-2.72821	0.00636791	0.0470105
AEBP2	ENSG00000139154.10	protein_coding	702.503	0.262128	0.096131	2.72678	0.0063955	0.0471881
SKA2	ENSG00000182628.8	protein_coding	1846.36	-0.242768	0.0890796	-2.72529	0.00642454	0.0473761
H1FX	ENSG00000184897.4	protein_coding	1466.72	-0.296013	0.108655	-2.72434	0.006443	0.047486
RGS19	ENSG00000171700.9	protein_coding	1040.53	0.289565	0.106314	2.72367	0.0064561	0.0475562
SLC25A4	ENSG00000151729.6	protein_coding	2605.13	0.2394	0.0879451	2.72216	0.00648576	0.0477483
KCTD17	ENSG00000100379.13	protein_coding	739.881	0.266231	0.0978212	2.7216	0.00649658	0.0478016
EFR3A	ENSG00000132294.9	protein_coding	5012.04	-0.222273	0.081689	-2.72096	0.00650919	0.0478417
GALNT2	ENSG00000143641.8	protein_coding	9939.58	-0.187858	0.0690374	-2.72111	0.0065063	0.0478417
NUP85	ENSG00000125450.6	protein_coding	3054.23	-0.257352	0.09472	-2.71697	0.00658821	0.0483691
PTPRG	ENSG00000144724.14	protein_coding	5058.91	0.227266	0.0836431	2.71709	0.00658588	0.0483691
NOL3	ENSG00000140939.10	protein_coding	2974.69	0.244837	0.090129	2.71651	0.00659734	0.0484095
LEPR	ENSG00000116678.14	protein_coding	761.478	0.265587	0.0977964	2.71572	0.00661322	0.0484823
ZFPL1	ENSG00000162300.7	protein_coding	418.915	0.32313	0.118988	2.71565	0.00661453	0.0484823
HHIP	ENSG00000164161.5	protein_coding	154.015	-0.394889	0.145457	-2.71482	0.00663123	0.0485781
PAK1IP1	ENSG00000111845.4	protein_coding	1414.9	-0.251737	0.0927515	-2.7141	0.00664565	0.048584
FYTTD1	ENSG00000122068.8	protein_coding	4075.71	-0.197698	0.0728384	-2.71419	0.00664372	0.048584
ZNF331	ENSG00000130844.12	protein_coding	753.995	-0.26425	0.0973609	-2.71413	0.00664502	0.048584
NLRC5	ENSG00000140853.11	protein_coding	1680.55	0.228302	0.0841297	2.71369	0.00665389	0.048584
PPFIA4	ENSG00000143847.11	protein_coding	3026.35	0.268131	0.0988012	2.71385	0.00665067	0.048584
DBI	ENSG00000155368.12	protein_coding	4155.71	-0.258257	0.0951661	-2.71375	0.0066526	0.048584
AKR1B1	ENSG00000085662.9	protein_coding	12161.4	-0.235104	0.0866798	-2.71232	0.00668132	0.0486246
FBXL20	ENSG00000108306.7	protein_coding	599.211	0.300502	0.110775	2.71272	0.00667329	0.0486246
KCTD10	ENSG00000110906.8	protein_coding	8287.33	-0.180603	0.0665804	-2.71255	0.0066767	0.0486246
LOXL1	ENSG00000129038.11	protein_coding	560.48	0.282698	0.104223	2.71244	0.00667893	0.0486246
TNFRSF21	ENSG00000146072.6	protein_coding	18943.8	0.198164	0.0730403	2.71308	0.0066661	0.0486246
TMEM237	ENSG00000155755.14	protein_coding	1024.31	-0.27858	0.102704	-2.71245	0.0066787	0.0486246
ZDHHC23	ENSG00000184307.9	protein_coding	294.644	0.328192	0.121032	2.7116	0.00669588	0.0487039
ARL1	ENSG00000120805.9	protein_coding	7370.65	-0.185	0.068244	-2.71086	0.00671082	0.048786
ACOX2	ENSG00000168306.8	protein_coding	1376.99	-0.276699	0.102085	-2.71047	0.00671877	0.0487907
LL22NC03-86G7.1	ENSG00000224086.3	antisense	101.123	-0.440746	0.162602	-2.71058	0.00671653	0.0487907
IRF9	ENSG00000213928.4	protein_coding	223.169	0.369881	0.136487	2.71002	0.00672799	0.048831
COL12A1	ENSG00000111799.16	protein_coding	2285.28	-0.252434	0.0931864	-2.70892	0.00675036	0.0489401
ARMCX1	ENSG00000126947.7	protein_coding	2540.38	0.204112	0.0753461	2.709	0.00674872	0.0489401
CCNJL	ENSG00000135083.10	protein_coding	4061.83	-0.213167	0.0787472	-2.70698	0.00678986	0.0491943
NOG	ENSG00000183691.4	protein_coding	1593.75	-0.324798	0.119992	-2.70684	0.00679279	0.0491943
MAOB	ENSG00000069535.12	protein_coding	91.3914	0.429188	0.158625	2.70568	0.00681649	0.0493123
SNRNP25	ENSG00000161981.6	protein_coding	869.677	-0.282901	0.104556	-2.70573	0.00681543	0.0493123
TFDP1	ENSG00000198176.8	protein_coding	4755.94	-0.210209	0.0777393	-2.70403	0.00685051	0.0495316
UBE2V2	ENSG00000169139.7	protein_coding	1863.37	-0.216893	0.0802582	-2.70244	0.00688333	0.0497419
RP11-308D16.4	ENSG00000234062.3	processed_transcript	59.9058	0.442415	0.163835	2.70036	0.00692642	0.0500262
MPZL1	ENSG00000197965.7	protein_coding	7421.54	-0.179049	0.0663199	-2.69977	0.00693864	0.0500874
PLEKHA7	ENSG00000166689.10	protein_coding	836.818	0.259516	0.0961474	2.69914	0.00695181	0.0501553
TARSL2	ENSG00000185418.11	protein_coding	262.583	0.346804	0.128501	2.69883	0.00695831	0.0501751
TASP1	ENSG00000089123.11	protein_coding	210.701	-0.355637	0.131808	-2.69816	0.00697249	0.0502501
MED12	ENSG00000184634.11	protein_coding	4848.01	0.238125	0.0883454	2.69539	0.00703062	0.0506417
DLAT	ENSG00000150768.11	protein_coding	3516.07	-0.201743	0.074886	-2.694	0.00705995	0.0508255
AP2S1	ENSG00000042753.7	protein_coding	9097.16	-0.24913	0.0924986	-2.69334	0.00707395	0.0508988
UBE2Q2	ENSG00000140367.7	protein_coding	2047.56	0.243797	0.0905526	2.69232	0.0070956	0.0509937
NHP2	ENSG00000145912.4	protein_coding	2085.58	-0.257806	0.0957657	-2.69205	0.0071014	0.0509937
UAP1L1	ENSG00000197355.6	protein_coding	1949.34	0.210078	0.0780377	2.692	0.00710242	0.0509937
CD2AP	ENSG00000198087.7	protein_coding	4200.43	-0.203443	0.0755682	-2.69217	0.00709881	0.0509937
RBM47	ENSG00000163694.10	protein_coding	809.174	-0.246671	0.0916437	-2.69163	0.00711038	0.0510234
HTATSF1	ENSG00000102241.7	protein_coding	5431.03	-0.194132	0.0721829	-2.68945	0.00715695	0.0513024
RP11-175O19.4	ENSG00000231025.1	antisense	518.102	-0.325137	0.12089	-2.68953	0.00715522	0.0513024
HTATIP2	ENSG00000109854.9	protein_coding	2092.71	-0.223459	0.0831114	-2.68866	0.00717385	0.0513959
PARP2	ENSG00000129484.9	protein_coding	1576.32	-0.27142	0.100966	-2.68823	0.00718315	0.0514349
DLC1	ENSG00000164741.10	protein_coding	775.833	-0.264557	0.0984473	-2.68729	0.00720344	0.0515525
PANK3	ENSG00000120137.6	protein_coding	5730.26	0.273957	0.101953	2.68709	0.0072078	0.0515561
LGR4	ENSG00000205213.9	protein_coding	6779.39	-0.213165	0.0793558	-2.68619	0.00722717	0.0516669
AKT1S1	ENSG00000204673.6	protein_coding	5139.62	0.220303	0.0820328	2.68555	0.00724105	0.0517384
FAM49B	ENSG00000153310.14	protein_coding	4073.59	-0.21493	0.080042	-2.68522	0.00724821	0.0517618
GABPB1	ENSG00000104064.12	protein_coding	991.577	-0.23299	0.0868009	-2.68418	0.00727072	0.0518948
SHC4	ENSG00000185634.7	protein_coding	169.395	0.395833	0.147488	2.68384	0.00727827	0.0519209
CDR2L	ENSG00000109089.7	protein_coding	2223.13	0.233772	0.0871333	2.68293	0.00729806	0.0520343
SLC25A40	ENSG00000075303.8	protein_coding	372.764	-0.315471	0.117736	-2.67948	0.00737361	0.0525193
TMTC2	ENSG00000179104.4	protein_coding	2131.6	0.242812	0.0906195	2.67947	0.00737396	0.0525193
RP11-145M9.4	ENSG00000269728.1	lincRNA	196.179	-0.382168	0.142641	-2.67923	0.00737919	0.0525285
ATP8B2	ENSG00000143515.12	protein_coding	2212.54	0.219069	0.0817818	2.6787	0.0073908	0.0525831
HS2ST1	ENSG00000153936.12	protein_coding	2109.62	0.26405	0.0986208	2.67742	0.00741909	0.0527562
MLPH	ENSG00000115648.9	protein_coding	10951.7	0.180288	0.0673413	2.67722	0.00742355	0.0527598
EPDR1	ENSG00000086289.7	protein_coding	1344.08	-0.22999	0.0860123	-2.67393	0.00749692	0.0532529
FAM129A	ENSG00000135842.12	protein_coding	4261.58	-0.219233	0.082041	-2.67224	0.00753464	0.0534923
STARD9	ENSG00000159433.7	protein_coding	1803.12	0.279978	0.104802	2.67151	0.00755114	0.053581
JPH1	ENSG00000104369.4	protein_coding	57.1997	-0.436655	0.163496	-2.67074	0.00756848	0.0536528
NOV	ENSG00000136999.4	protein_coding	1887.94	-0.234743	0.0878958	-2.6707	0.00756931	0.0536528
SPATA5	ENSG00000145375.7	protein_coding	499.839	-0.297653	0.111473	-2.67018	0.00758104	0.0536789
MRPL13	ENSG00000172172.3	protein_coding	2101.2	-0.271475	0.101665	-2.67028	0.00757873	0.0536789
SLC12A4	ENSG00000124067.12	protein_coding	2369.44	0.205443	0.0769496	2.66984	0.00758872	0.0537048
AHRR	ENSG00000063438.12	protein_coding	628.179	0.273757	0.102586	2.66857	0.0076175	0.0538799
SERPING1	ENSG00000149131.11	protein_coding	142.076	0.401214	0.150359	2.66838	0.00762186	0.0538821
ITFG1	ENSG00000129636.8	protein_coding	4032.16	-0.208701	0.0782231	-2.66802	0.00763001	0.0539112
RP11-296I10.3	ENSG00000247228.2	antisense	246.508	0.352992	0.132398	2.66615	0.00767262	0.0541836
IRAK2	ENSG00000134070.4	protein_coding	4462.23	0.192562	0.0722379	2.66566	0.00768379	0.0542338
WDR12	ENSG00000138442.5	protein_coding	1545.39	-0.216645	0.0812886	-2.66513	0.00769584	0.0542901
EIF2S1	ENSG00000134001.8	protein_coding	6698.28	-0.188171	0.0706274	-2.66427	0.00771555	0.0544003
WDR60	ENSG00000126870.11	protein_coding	3941.47	0.239685	0.0900088	2.66291	0.00774692	0.0545926
CTDSP2	ENSG00000175215.5	protein_coding	12183.7	0.190467	0.0715406	2.66236	0.00775953	0.0546526
ESAM	ENSG00000149564.7	protein_coding	7045.52	-0.249272	0.0936526	-2.66167	0.00777539	0.0547354
TSEN2	ENSG00000154743.13	protein_coding	547.536	-0.274866	0.103304	-2.66075	0.00779658	0.0548557
INTS7	ENSG00000143493.8	protein_coding	2104.29	-0.203394	0.0764549	-2.66031	0.00780678	0.0548985
CCDC28A	ENSG00000024862.12	protein_coding	872.944	0.25241	0.0949108	2.65944	0.007827	0.0549519
NECAB3	ENSG00000125967.12	protein_coding	928.306	0.297669	0.111936	2.65928	0.00783085	0.0549519
PRDX3	ENSG00000165672.5	protein_coding	10273.4	-0.206143	0.0775055	-2.65973	0.0078204	0.0549519
RELL1	ENSG00000181826.5	protein_coding	410.717	0.3401	0.127877	2.65959	0.00782361	0.0549519
SEMA3B	ENSG00000012171.13	processed_transcript	3101.84	0.254915	0.0960406	2.65424	0.00794865	0.0557492
PPARA	ENSG00000186951.12	protein_coding	1640.87	0.271342	0.102246	2.65381	0.00795882	0.0557912
TPGS1	ENSG00000141933.8	protein_coding	216.607	0.412778	0.155554	2.65359	0.00796394	0.0557977
TUBB3	ENSG00000258947.2	protein_coding	389.862	0.328391	0.12377	2.65323	0.00797256	0.0558288
PTP4A1	ENSG00000112245.6	protein_coding	7869.59	0.226279	0.0853285	2.65186	0.00800498	0.0560265
PAICS	ENSG00000128050.4	protein_coding	11949.3	-0.186039	0.0701742	-2.65111	0.00802281	0.0561218
SHH	ENSG00000164690.3	protein_coding	367.627	0.305737	0.115334	2.65089	0.008028	0.0561287
ZNF644	ENSG00000122482.16	protein_coding	3279.73	0.208815	0.0787782	2.65067	0.00803326	0.056136
TM9SF1	ENSG00000100926.10	protein_coding	523.398	0.273689	0.103261	2.65045	0.00803856	0.0561437
MBOAT1	ENSG00000172197.9	protein_coding	264.584	-0.33499	0.126503	-2.64808	0.00809502	0.0564793
AC009403.2	ENSG00000216895.4	protein_coding	65.8385	-0.427109	0.16129	-2.64808	0.00809509	0.0564793
CACNB1	ENSG00000067191.11	protein_coding	997.814	0.255665	0.0965736	2.64736	0.00811236	0.0565702
TRIM3	ENSG00000110171.14	protein_coding	1272.39	0.224254	0.0847214	2.64696	0.00812185	0.0566068
CLDN1	ENSG00000163347.5	protein_coding	166.525	-0.377878	0.142782	-2.64654	0.0081321	0.0566487
PARP1	ENSG00000143799.8	protein_coding	6943.4	-0.214407	0.0810392	-2.64571	0.00815187	0.0567568
NUDC	ENSG00000090273.9	protein_coding	7695.72	-0.212394	0.0803189	-2.64438	0.00818411	0.0569218
IGFBPL1	ENSG00000137142.4	protein_coding	231.5	-0.339482	0.128376	-2.64444	0.00818267	0.0569218
ZNF140	ENSG00000196387.5	protein_coding	888.303	0.237586	0.0898743	2.64354	0.00820439	0.0570331
C8orf82	ENSG00000213563.2	protein_coding	2252.01	0.236479	0.0894729	2.64302	0.00821695	0.0570907
MOCS1	ENSG00000124615.13	protein_coding	2439.91	-0.213826	0.0809077	-2.64284	0.00822148	0.0570924
C14orf80	ENSG00000185347.13	protein_coding	717.258	-0.339977	0.128692	-2.64178	0.00824716	0.0572409
SNAI2	ENSG00000019549.4	protein_coding	850.124	-0.255358	0.0966779	-2.64133	0.00825821	0.0572865
TRPS1	ENSG00000104447.7	protein_coding	2368.61	0.242618	0.0918666	2.64098	0.0082666	0.0572865
ZNF100	ENSG00000197020.6	protein_coding	241.698	-0.333417	0.126243	-2.64107	0.00826448	0.0572865
SEC61A2	ENSG00000065665.16	protein_coding	537.479	0.260282	0.0985706	2.64057	0.00827669	0.0573207
EEF1A2	ENSG00000101210.6	protein_coding	998.824	0.271317	0.102769	2.64008	0.00828873	0.0573207
EPM2A	ENSG00000112425.9	protein_coding	223.934	-0.345064	0.130686	-2.6404	0.00828072	0.0573207
CDC40	ENSG00000168438.10	protein_coding	1384.53	-0.211351	0.0800517	-2.64018	0.00828628	0.0573207
CTNNA1	ENSG00000044115.16	protein_coding	64331.8	-0.183612	0.0695598	-2.63963	0.00829961	0.0573662
SPOPL	ENSG00000144228.4	protein_coding	1050.17	0.255148	0.0967043	2.63843	0.0083291	0.0575156
ZNF358	ENSG00000198816.5	protein_coding	2083.04	0.275434	0.104394	2.6384	0.00832984	0.0575156
ITFG2	ENSG00000111203.7	protein_coding	492.509	0.273842	0.103864	2.63654	0.00837554	0.0578012
OSBPL5	ENSG00000021762.15	protein_coding	1752.96	0.226673	0.0859894	2.63606	0.00838745	0.0578535
PDK4	ENSG00000004799.7	protein_coding	637.813	0.321187	0.121871	2.63547	0.00840207	0.0578645
ATXN10	ENSG00000130638.11	protein_coding	4301.26	-0.185011	0.0701992	-2.63552	0.00840091	0.0578645
DCUN1D5	ENSG00000137692.7	protein_coding	1862.71	-0.238067	0.0903205	-2.63581	0.00839373	0.0578645
SCARF1	ENSG00000074660.11	protein_coding	159.536	0.374583	0.142143	2.63526	0.00840736	0.0578711
MEGF6	ENSG00000162591.11	protein_coding	846.885	0.26158	0.0992827	2.6347	0.00842113	0.057936
IRF7	ENSG00000185507.15	protein_coding	1615.14	0.263293	0.100005	2.63279	0.00846866	0.0582329
ASS1	ENSG00000130707.13	protein_coding	1396.76	0.240338	0.0913421	2.63118	0.00850889	0.0584795
ZW10	ENSG00000086827.4	protein_coding	1798.12	-0.21344	0.0811609	-2.62984	0.00854249	0.0586499
HTRA1	ENSG00000166033.7	protein_coding	6717.22	0.180358	0.0685806	2.62987	0.00854187	0.0586499
UCHL5	ENSG00000116750.9	protein_coding	1583.46	-0.220389	0.0838322	-2.62893	0.0085654	0.058777
SLC38A4	ENSG00000139209.11	protein_coding	252.474	0.32814	0.124842	2.62844	0.00857781	0.0588319
EML6	ENSG00000214595.7	protein_coding	807.019	0.253674	0.0965239	2.62809	0.00858649	0.0588611
AGPAT3	ENSG00000160216.14	protein_coding	4496.72	-0.201096	0.076525	-2.62785	0.00859275	0.0588738
ELFN2	ENSG00000166897.10	protein_coding	477.78	0.288157	0.109681	2.62723	0.00860844	0.058951
CEP85	ENSG00000130695.9	protein_coding	2217.87	-0.23904	0.0910008	-2.6268	0.00861929	0.0589648
ENDOD1	ENSG00000149218.4	protein_coding	3610.85	-0.205815	0.0783499	-2.62687	0.00861733	0.0589648
MST1R	ENSG00000164078.8	protein_coding	1724.02	0.228383	0.0869641	2.62617	0.00863514	0.059043
DFNB31	ENSG00000095397.9	protein_coding	993.678	0.241222	0.0918961	2.62494	0.00866633	0.0592258
UBE2E2	ENSG00000182247.5	protein_coding	1407.49	0.243632	0.0928292	2.62452	0.0086771	0.0592691
UBE2N	ENSG00000177889.5	protein_coding	5834.12	-0.210555	0.0802341	-2.62426	0.00868363	0.0592834
SH3GLB1	ENSG00000097033.10	protein_coding	8500.08	0.225363	0.0858942	2.62372	0.00869742	0.0593334
MYO19	ENSG00000141140.12	protein_coding	4288.88	-0.234046	0.089213	-2.62345	0.00870431	0.0593334
HAUS5	ENSG00000249115.4	protein_coding	1081.01	-0.274809	0.104747	-2.62354	0.00870202	0.0593334
TP63	ENSG00000073282.8	protein_coding	378.717	0.326585	0.124554	2.62204	0.00874043	0.0595492
AIM1	ENSG00000112297.10	protein_coding	4213.39	-0.182376	0.0695912	-2.62068	0.00877545	0.0597573
ITPKA	ENSG00000137825.6	protein_coding	208.125	0.357324	0.136386	2.61995	0.0087942	0.0598544
BACH2	ENSG00000112182.10	protein_coding	256.85	0.331969	0.126719	2.61972	0.0088001	0.059864
HAUS2	ENSG00000137814.5	protein_coding	949.54	-0.249471	0.0952875	-2.61809	0.00884242	0.0601212
SYTL3	ENSG00000164674.11	protein_coding	168.919	-0.369471	0.141143	-2.6177	0.00885239	0.0601584
VCP	ENSG00000165280.11	protein_coding	33599.3	-0.176704	0.067519	-2.6171	0.00886812	0.0601853
RAB8A	ENSG00000167461.7	protein_coding	3012.93	-0.196897	0.0752369	-2.61703	0.00886988	0.0601853
BCL2	ENSG00000171791.10	protein_coding	152.841	-0.373678	0.142773	-2.61728	0.00886328	0.0601853
CYHR1	ENSG00000187954.8	protein_coding	5203.55	0.194287	0.0742445	2.61685	0.00887454	0.0601863
BUB3	ENSG00000154473.13	protein_coding	8926.64	-0.194473	0.0743294	-2.61636	0.00888716	0.0602412
CTD-2020K17.1	ENSG00000267121.1	antisense	723.919	0.263986	0.10093	2.61554	0.00890866	0.0603563
PIGX	ENSG00000163964.9	protein_coding	723.929	-0.24507	0.093704	-2.61536	0.00891325	0.0603567
YWHAE	ENSG00000108953.12	protein_coding	36595.1	-0.172788	0.0661009	-2.614	0.00894883	0.0605669
THBS3	ENSG00000169231.9	protein_coding	1247.27	0.240332	0.0919543	2.6136	0.00895929	0.060607
BOLA3	ENSG00000163170.7	protein_coding	795.264	-0.296925	0.113657	-2.61247	0.00898919	0.0607784
ANKRD29	ENSG00000154065.12	protein_coding	2061.92	0.234967	0.0899703	2.61161	0.0090118	0.0609004
TXNDC12	ENSG00000117862.7	protein_coding	3617.81	-0.203648	0.0780778	-2.60827	0.00910012	0.0614661
SOAT1	ENSG00000057252.8	protein_coding	3713.14	-0.192226	0.0737186	-2.60757	0.00911874	0.0615607
GCHFR	ENSG00000137880.4	protein_coding	445.956	0.312548	0.11987	2.60739	0.00912354	0.061562
ZNF439	ENSG00000171291.4	protein_coding	936.155	0.24077	0.092363	2.60678	0.00913982	0.0616095
GSTM2	ENSG00000213366.8	protein_coding	336.306	0.293887	0.112737	2.60684	0.00913822	0.0616095
TSPAN17	ENSG00000048140.13	protein_coding	3432.45	0.204394	0.0784747	2.60458	0.00919866	0.0619435
TRIM62	ENSG00000116525.9	protein_coding	665.139	0.267774	0.102805	2.60468	0.00919597	0.0619435
CEP72	ENSG00000112877.6	protein_coding	380.363	-0.29519	0.113364	-2.60392	0.00921638	0.0620003
ZBTB44	ENSG00000196323.7	protein_coding	2800.91	0.221847	0.0851917	2.60409	0.0092118	0.0620003
P4HA1	ENSG00000122884.8	protein_coding	14055.9	0.234776	0.090195	2.60298	0.00924162	0.0621387
TXLNG	ENSG00000086712.8	protein_coding	1417.8	-0.211246	0.0811802	-2.60219	0.009263	0.0621962
DCAF13	ENSG00000164934.9	protein_coding	4034.99	-0.206735	0.0794478	-2.60215	0.00926416	0.0621962
SOCS5	ENSG00000171150.7	protein_coding	1922.33	0.251942	0.0968178	2.60223	0.00926195	0.0621962
FAM136A	ENSG00000035141.3	protein_coding	3085.16	-0.219171	0.0842366	-2.60185	0.00927214	0.0622185
OARD1	ENSG00000124596.12	protein_coding	3721.21	-0.195953	0.0753306	-2.60125	0.00928857	0.062296
VKORC1L1	ENSG00000196715.5	protein_coding	1121.98	-0.230631	0.0886673	-2.60108	0.00929303	0.062296
SUMF1	ENSG00000144455.9	protein_coding	1846.74	-0.222657	0.0856321	-2.60016	0.00931814	0.0624329
IL1RAPL1	ENSG00000169306.5	protein_coding	368.528	-0.312477	0.120338	-2.59666	0.00941349	0.0630401
VDAC3	ENSG00000078668.9	protein_coding	3411.68	-0.216968	0.0835856	-2.59576	0.00943823	0.0631256
FNDC3A	ENSG00000102531.12	protein_coding	4214.12	0.218997	0.0843832	2.59527	0.00945172	0.0631256
RAB15	ENSG00000139998.10	protein_coding	185.094	0.367987	0.141797	2.59516	0.00945465	0.0631256
MTMR12	ENSG00000150712.6	protein_coding	2392.56	-0.207327	0.0798786	-2.59552	0.00944477	0.0631256
HEG1	ENSG00000173706.8	protein_coding	7880.5	-0.225822	0.0869953	-2.59579	0.00943724	0.0631256
YES1	ENSG00000176105.9	protein_coding	4177.28	0.246928	0.0951409	2.59539	0.00944824	0.0631256
PLEK2	ENSG00000100558.4	protein_coding	2725.88	-0.236396	0.091109	-2.59465	0.00946872	0.063188
[truncated: 24,956 more rows]
