# Supplementary material for: SCIRT lncRNA Restrains Tumorigenesis by Opposing Transcriptional Programs of Tumor-Initiating Cells
Source: Oxford University Press journal article supplement (doi:10.1158/0008-5472.can-20-2612), 2020-11-10
Supplement: 00085472can202612-sup-248586_2_supp_6687197_q3yknn.xlsx [file 00085472can202612-sup-248586_2_supp_6687197_q3yknn.xlsx]

## Sheet: SCIRT peaks rep#1
# HOMER Peaks
# Peak finding parameters:
# tag directory = ChartAS1/
#
# total peaks = 45996
# peak size = 127
# peaks found using tags on both strands
# minimum distance between peaks = 254
# fragment length = 126
# genome size = 2000000000
# Total tags = 52079124.0
# Total tags in peaks = 1092579.0
# Approximate IP efficiency = 2.10%
# tags per bp = 0.024842
# expected tags per peak = 3.155
# maximum tags considered per bp = 2.0
# effective number of tags used for normalization = 10000000.0
# Peaks have been centered at maximum tag pile-up
# FDR rate threshold = 0.001000000
# FDR effective poisson threshold = 1.236135e-06
# FDR tag threshold = 15.0
# number of putative peaks = 110812
#
# input tag directory = Input/
# Fold over input required = 4.00
# Poisson p-value over input required = 1.00e-04
# Putative peaks filtered by input = 43380
#
# size of region used for local filtering = 10000
# Fold over local region required = 4.00
# Poisson p-value over local region required = 1.00e-04
# Putative peaks filtered by local signal = 21404
#
# Maximum fold under expected unique positions for tags = 2.00
# Putative peaks filtered for being too clonal = 32
#
# cmd = findPeaks ChartAS1/ -style factor -o auto -i Input/
#
# Column Headers:
#PeakID	chr	start	end	strand	Normalized Tag Count	focus ratio	findPeaks Score	Total Tags	Control Tags (normalized to IP Experiment)	Fold Change vs Control	p-value vs Control	Fold Change vs Local	p-value vs Local
chr7-1	chr7	61969320	61969446	+	3727.4	0.568	394	19490	4424.5	4.41	0	18.07	0
chr7-2	chr7	61968985	61969111	+	3328.6	0.696	346	17439	3976.8	4.39	0	15.73	0
chr1-3	chr1	569864	569990	+	1467.4	0.999	195	7642	978.2	7.81	0	181.18	0
chr2-16	chr2	149639269	149639395	+	1174.8	0.999	141	6118	613.1	9.98	0	3744.99	0
chr5-5	chr5	134260207	134260333	+	1097.2	0.998	136	5714	594.5	9.61	0	99.58	0
chr4-1	chr4	68265521	68265647	+	787.8	0.984	199	4121	850	4.85	0	114.28	0
chr16-1	chr16	1075349	1075475	+	65.1	0.716	212	339	42.7	7.93	1.4e-178	64.09	0
chr5-7	chr5	49414381	49414507	+	50.3	0.996	115	262	62.2	4.21	5.16e-79	257.82	0
chr12-1	chr12	95467450	95467576	+	34.4	0.819	149	180	8.4	21.53	1.22e-167	31.92	3.74e-196
chr19-14	chr19	27804745	27804871	+	33.4	0.946	110	175	43.7	4.01	1.34e-50	30.26	7.77e-187
chr19-8	chr19	18633387	18633513	+	32.8	0.705	146	174	10.2	17.03	2.58e-145	18.72	1.28e-148
chr6-8	chr6	41545636	41545762	+	32.3	0.738	146	168	11.1	15.07	5.13e-132	7.39	4.97e-85
chr6-9	chr6	42165910	42166036	+	30.7	0.728	146	162	16.7	9.69	7.29e-99	12.04	5.11e-110
chr20-4	chr20	34129625	34129751	+	30.1	0.881	137	158	2.8	56.7	7.18e-212	26.37	1.05e-157
chr5-10	chr5	46384388	46384514	+	29.8	0.958	92	155	33.4	4.63	1.46e-52	26.72	1.46e-158
chr12-2	chr12	110939898	110940024	+	29.8	0.756	140	155	8.4	18.54	4.55e-135	20.86	1.09e-141
chr6-11	chr6	32812444	32812570	+	27.1	0.733	130	142	4.6	30.57	1.88e-153	14.69	7.01e-109
chr12-3	chr12	95034489	95034615	+	26.9	0.755	138	141	11.1	12.65	3.68e-101	18.76	6.98e-123
chr19-11	chr19	46234325	46234451	+	26.7	0.707	126	140	4.6	30.14	1.75e-150	23.29	1.95e-134
chr3-1	chr3	172468450	172468576	+	26.5	0.744	135	142	5.6	25.48	1.31e-142	21.78	1.01e-128
chr6-13	chr6	71122872	71122998	+	25.7	0.804	126	134	6.5	20.61	7.09e-123	27.79	1.55e-138
chr8-2	chr8	123671472	123671598	+	25.7	0.743	130	137	8.4	16.39	1.1e-112	23.5	3.25e-129
chr6-14	chr6	30585217	30585343	+	25.3	0.69	120	132	10.2	12.92	6.11e-96	18.02	6.08e-113
chr12-7	chr12	122356387	122356513	+	25.2	0.84	116	131	2.8	47.01	1.51e-165	24.64	6.19e-128
chr6-15	chr6	42099449	42099575	+	24.2	0.746	120	126	16.7	7.54	3.59e-65	12.2	8.88e-89
chr6-17	chr6	36562044	36562170	+	23.6	0.782	110	123	12.1	10.19	6.2e-78	11.56	4.35e-84
chr6-16	chr6	40904536	40904662	+	23.4	0.648	111	123	8.4	14.71	5.61e-96	8.64	5.93e-69
chr6-19	chr6	37105363	37105489	+	23	0.769	108	120	14.9	8.07	2.69e-65	10.24	2.48e-76
chr6-29	chr6	169825760	169825886	+	23	0.63	96	120	5.6	21.53	2.05e-112	18.92	5.11e-106
chr3-2	chr3	197121659	197121785	+	22.8	0.741	117	119	5.6	21.35	4.4e-111	18.27	1.37e-102
chr9-2	chr9	131674866	131674992	+	22.7	0.763	115	118	5.6	21.17	9.41e-110	15.21	5.73e-93
chr17-13	chr17	70062	70188	+	22.1	0.791	93	115	11.1	10.32	1.45e-73	17.45	5.21e-97
chr5-14	chr5	180472990	180473116	+	21.9	0.864	75	114	13	8.77	1.02e-65	25.03	4.87e-114
chr6-18	chr6	4576128	4576254	+	21.9	0.611	109	116	6.5	17.84	9.72e-100	20.9	1.71e-105
chr9-3	chr9	68413520	68413646	+	21.9	0.663	108	114	26.9	4.23	1.19e-35	8.81	6.15e-66
chr6-20	chr6	21593863	21593989	+	21.7	0.713	105	113	10.2	11.06	2.06e-75	15.36	1.64e-89
chr6-22	chr6	42533009	42533135	+	21.7	0.662	103	114	13	8.77	1.02e-65	11.48	4.24e-77
chr14-2	chr14	54391511	54391637	+	21.7	0.782	103	113	5.6	20.27	3.68e-103	18.26	2.68e-98
chr19-12	chr19	39881750	39881876	+	21.7	0.688	112	113	4.6	24.33	1.04e-111	18.69	2.26e-99
chr19-19	chr19	54640761	54640887	+	21.5	0.773	106	112	6.5	17.22	9.36e-95	25.76	2.09e-113
chr19-18	chr19	17448187	17448313	+	21.1	0.739	106	111	8.4	13.28	3.34e-82	11.34	1.47e-74
chr20-7	chr20	34472119	34472245	+	21.1	0.646	104	110	7.4	14.8	2.63e-86	15.27	1.07e-87
chr1-18	chr1	43824517	43824643	+	20.9	0.725	110	109	3.7	29.33	2.38e-116	15.18	6.96e-86
chr6-23	chr6	35265565	35265691	+	20.9	0.78	101	109	14.9	7.33	1.61e-55	9.36	1.69e-64
chr11-4	chr11	1212812	1212938	+	20.9	0.835	97	109	22.3	4.89	1.62e-39	28.92	1.06e-115
chr20-9	chr20	62324852	62324978	+	20.9	0.801	100	109	18.6	5.87	1.49e-46	14.92	6.93e-86
chr19-20	chr19	55700771	55700897	+	20.7	0.649	106	108	2.8	38.75	5.63e-128	18.45	1.72e-94
chr1-23	chr1	145059085	145059211	+	20.5	0.64	99	107	17.6	6.06	5.3e-47	9.65	8.77e-66
chr6-21	chr6	42013594	42013720	+	20.5	0.693	105	107	13	8.23	3.38e-59	7.87	2.2e-57
chr19-21	chr19	17378111	17378237	+	20.5	0.605	105	108	11.1	9.69	1.5e-66	11.87	1.68e-74
chr1-21	chr1	32860209	32860335	+	20.4	0.594	103	106	2.8	38.04	8.38e-125	13.73	4.98e-80
chr19-17	chr19	16222494	16222620	+	20.4	0.698	106	108	9.3	11.63	2.66e-74	11.89	6.55e-74
chr5-11	chr5	49434906	49435032	+	20.2	0.799	81	105	26	4.04	2.41e-31	8.12	1.31e-57
chr5-9	chr5	178981017	178981143	+	20.2	0.83	96	105	10.2	10.28	3.6e-67	24.01	2.36e-103
chr6-30	chr6	42283781	42283907	+	20.2	0.617	94	105	17.6	5.95	1.94e-45	6.99	1.18e-51
chr12-8	chr12	109125878	109126004	+	20.2	0.747	99	105	6.5	16.15	3.49e-86	11.76	8.96e-73
chr17-10	chr17	42853173	42853299	+	20.2	0.737	99	105	4.6	22.61	9.96e-101	15.58	1.2e-84
chr19-29	chr19	39921624	39921750	+	20.2	0.693	95	105	1.9	56.52	2.59e-141	15.29	7.69e-84
chr6-24	chr6	33217111	33217237	+	20	0.738	100	104	11.1	9.33	1.26e-62	11.86	8.97e-72
chr6-28	chr6	42012073	42012199	+	20	0.765	98	104	8.4	12.44	2.01e-74	8.26	4.07e-56
chr19-22	chr19	18157048	18157174	+	20	0.683	102	105	6.5	16.15	3.49e-86	10.81	1.28e-68
chr19-23	chr19	47931537	47931663	+	20	0.667	99	105	4.6	22.61	9.96e-101	11.15	3e-69
chr11-3	chr11	130036485	130036611	+	19.8	0.795	98	104	4.6	22.39	2.25e-99	15.95	4.61e-84
chr2-38	chr2	10418556	10418682	+	19.6	0.67	97	102	6.5	15.69	1.43e-82	12.91	1.48e-74
chr14-4	chr14	67654045	67654171	+	19.4	0.766	91	101	0.9	108.73	2.45e-164	15.9	9.55e-81
chr4-5	chr4	124476825	124476951	+	19.2	0.813	97	101	4.6	21.75	2.46e-95	20.24	1.88e-91
chr5-8	chr5	133772191	133772317	+	19.2	0.76	98	100	4.6	21.53	5.35e-94	12.77	1.15e-72
chr6-27	chr6	41546087	41546213	+	19.2	0.636	98	100	13	7.69	7.13e-53	4.17	2.01e-30
chr8-7	chr8	95254734	95254860	+	19.2	0.722	98	100	7.4	13.46	8.77e-75	17.22	5.82e-84
chr8-11	chr8	130996675	130996801	+	19.2	0.807	92	101	5.6	18.12	9.75e-88	14.86	8.39e-79
chr14-3	chr14	73925400	73925526	+	19.2	0.634	97	100	7.4	13.46	8.77e-75	18.08	8.6e-87
chr19-28	chr19	18788954	18789080	+	19.2	0.667	95	100	13	7.69	7.13e-53	12.34	2.61e-71
chr19-25	chr19	50083765	50083891	+	19.2	0.859	97	100	2.8	35.88	2.2e-115	20.62	3.27e-92
chr20-8	chr20	32581341	32581467	+	19.2	0.65	100	101	4.6	21.75	2.46e-95	11.57	9.71e-69
chr20-15	chr20	47132814	47132940	+	19.2	0.68	90	100	16.7	5.98	1.49e-43	7.65	1.09e-52
chr6-26	chr6	37786817	37786943	+	19	0.669	98	100	7.4	13.46	8.77e-75	9.68	3.96e-61
chr14-6	chr14	25166338	25166464	+	19	0.645	88	101	2.8	36.24	6.07e-117	12.56	2.67e-71
chr19-31	chr19	45256711	45256837	+	19	0.692	94	100	4.6	21.53	5.35e-94	13.54	4.05e-72
chr1-26	chr1	151138305	151138431	+	18.8	0.679	97	99	3.7	26.64	7.36e-102	14.29	1.04e-75
chr1-24	chr1	155940401	155940527	+	18.8	0.759	99	98	7.4	13.19	1.58e-72	12.07	4.54e-69
chr8-10	chr8	145022649	145022775	+	18.8	0.676	93	99	8.4	11.84	5.46e-69	8.87	1.2e-56
chr17-12	chr17	76136489	76136615	+	18.8	0.701	99	99	9.3	10.66	7.39e-65	11.54	2.57e-67
chr6-25	chr6	32939664	32939790	+	18.6	0.677	99	97	4.6	20.88	5.19e-90	7.98	3.42e-52
chr17-11	chr17	65418253	65418379	+	18.6	0.747	99	99	4.6	21.31	1.15e-92	22.34	8.61e-92
chr20-10	chr20	36781176	36781302	+	18.6	0.68	97	98	5.6	17.58	5.64e-84	11.85	5.71e-67
chr1-27	chr1	33565141	33565267	+	18.4	0.676	94	96	3.7	25.84	1.35e-97	14.3	3.26e-74
chr6-37	chr6	43737337	43737463	+	18.4	0.75	85	96	3.7	25.84	1.35e-97	9.81	3.23e-59
chr12-9	chr12	124938006	124938132	+	18.4	0.705	92	98	8.4	11.72	6.47e-68	14.54	4.21e-74
chr19-26	chr19	8590615	8590741	+	18.4	0.597	95	98	2.8	35.17	2.81e-112	9.41	1.12e-57
chr19-33	chr19	18314807	18314933	+	18.4	0.721	91	96	7.4	12.92	2.72e-70	13.05	1.12e-70
chr19-30	chr19	55851103	55851229	+	18.4	0.685	95	96	5.6	17.22	1.73e-81	14.04	9.15e-73
chr6-31	chr6	36952666	36952792	+	18.2	0.58	92	96	19.5	4.92	3.08e-35	5.89	5.75e-41
chr6-34	chr6	44042407	44042533	+	18.2	0.659	91	95	7.4	12.78	3.51e-69	8.92	1.03e-55
chr20-12	chr20	33464040	33464166	+	18.2	0.655	94	95	11.1	8.52	4.77e-54	9.68	3.97e-58
chr6-32	chr6	34511348	34511474	+	18	0.768	91	94	7.4	12.65	4.49e-68	11.17	1.97e-63
chr6-33	chr6	42897063	42897189	+	18	0.752	91	94	14.9	6.32	5.76e-43	8.37	7.51e-53
chr17-14	chr17	78904127	78904253	+	18	0.614	93	95	9.3	10.23	9e-61	17.74	5.84e-81
chr19-27	chr19	16441422	16441548	+	18	0.646	95	94	6.5	14.46	3.98e-73	8.56	1.21e-53
chr1-32	chr1	44300264	44300390	+	17.9	0.658	85	94	5.6	16.87	5.08e-79	13.47	5.51e-69
chr3-3	chr3	37034692	37034818	+	17.9	0.6	90	94	9.3	10.12	9.21e-60	16.22	6.57e-76
chr8-12	chr8	122736989	122737115	+	17.9	0.694	88	93	9.3	10.01	9.33e-59	12.73	1.33e-67
chr11-5	chr11	76155663	76155789	+	17.9	0.818	93	93	7.4	12.51	5.69e-67	25.27	9.26e-93
chr20-11	chr20	1396670	1396796	+	17.9	0.694	95	93	4.6	20.02	9.3e-85	16.18	8e-76
chr1-33	chr1	118472267	118472393	+	17.7	0.84	85	92	7.4	12.38	7.12e-66	24.92	3.2e-92
chr2-49	chr2	37311549	37311675	+	17.7	0.763	88	92	5.6	16.51	1.43e-76	27.72	2.57e-96
chr4-7	chr4	40297161	40297287	+	17.5	0.56	92	91	16.7	5.44	1.02e-36	12.93	9.03e-67
chr4-12	chr4	49516469	49516595	+	17.5	0.831	81	91	22.3	4.08	9.83e-28	5.85	4.44e-39
chr8-17	chr8	116235308	116235434	+	17.5	0.739	83	91	2.8	32.65	1.5e-101	18.62	3.03e-80
chr11-6	chr11	6256099	6256225	+	17.5	0.683	91	94	7.4	12.65	4.49e-68	13.33	3.84e-67
chr19-35	chr19	6424848	6424974	+	17.5	0.69	88	91	2.8	32.65	1.5e-101	10.69	1.3e-58
chr19-32	chr19	55973163	55973289	+	17.5	0.713	93	92	5.6	16.51	1.43e-76	14.56	4.17e-71
chr20-16	chr20	42568089	42568215	+	17.5	0.698	86	91	4.6	19.59	3.69e-82	8.21	1.55e-50
chr1-30	chr1	226187044	226187170	+	17.3	0.742	88	90	4.6	19.38	7.24e-81	16.75	1.13e-74
chr3-5	chr3	196006358	196006484	+	17.3	0.734	86	90	3.7	24.22	3.44e-89	24.29	2.66e-89
chr8-15	chr8	129603661	129603787	+	17.3	0.714	85	90	3.7	24.22	3.44e-89	17.99	4.14e-78
chr14-5	chr14	91527204	91527330	+	17.3	0.661	90	90	5.6	16.15	3.86e-74	12.61	3.9e-65
chr15-1	chr15	44092691	44092817	+	17.3	0.815	80	90	1.9	48.44	1.74e-115	25.44	4.91e-91
chr17-18	chr17	48238953	48239079	+	17.3	0.788	89	90	7.4	12.11	1.08e-63	16.42	9.2e-75
chr19-37	chr19	14530234	14530360	+	17.3	0.669	87	90	12.1	7.45	1.04e-46	11.96	3.04e-63
chr19-46	chr19	49497031	49497157	+	17.3	0.806	84	90	5.6	16.15	3.86e-74	15.72	3.67e-73
chr3-6	chr3	189052437	189052563	+	17.1	0.795	81	89	1.9	47.9	8.45e-114	23.27	8.83e-86
chr4-10	chr4	40297441	40297567	+	17.1	0.549	88	89	11.1	7.98	1.57e-48	12.18	3.92e-61
chr6-36	chr6	42951960	42952086	+	17.1	0.605	86	89	9.3	9.58	8.83e-55	6.68	1.46e-42
chr7-12	chr7	151290028	151290154	+	17.1	0.809	83	89	5.6	15.97	6.24e-73	19.6	1.57e-79
chr7-9	chr7	157197837	157197963	+	17.1	0.726	92	91	3.7	24.49	1.4e-90	12.84	4.47e-65
chr19-34	chr19	58838166	58838292	+	17.1	0.689	89	89	10.2	8.71	1.7e-51	11.88	1.24e-61
chr21-9	chr21	46786856	46786982	+	17.1	0.822	79	90	4.6	19.38	7.24e-81	18.35	5.34e-78
chr22-1	chr22	38694757	38694883	+	17.1	0.707	86	89	4.6	19.16	1.4e-79	17.79	7.45e-77
chr4-9	chr4	1317868	1317994	+	16.9	0.565	88	90	2.8	32.3	4.91e-100	12.35	5.31e-63
chr6-39	chr6	42306418	42306544	+	16.9	0.675	84	89	9.3	9.58	8.83e-55	7.4	1.86e-45
chr6-45	chr6	167846542	167846668	+	16.9	0.725	81	88	6.5	13.53	3.1e-66	17.32	4.72e-75
chr12-12	chr12	108959857	108959983	+	16.9	0.735	82	88	2.8	31.58	5.06e-97	14.51	5.85e-68
chr19-47	chr19	8426926	8427052	+	16.9	0.71	83	88	4.6	18.95	2.69e-78	10.77	1.4e-57
chr19-49	chr19	59084966	59085092	+	16.9	0.765	82	89	7.4	11.98	1.31e-62	11.63	6.51e-61
chr6-38	chr6	10723015	10723141	+	16.7	0.73	84	87	7.4	11.71	1.86e-60	12.78	8.4e-63
chr6-35	chr6	26104075	26104201	+	16.7	0.706	87	87	7.4	11.71	1.86e-60	15.03	3.43e-69
chr6-40	chr6	42167868	42167994	+	16.7	0.734	83	87	5.6	15.61	1.58e-70	6.33	6.5e-40
chr19-44	chr19	40931928	40932054	+	16.7	0.765	84	88	2.8	31.58	5.06e-97	11.42	1.3e-59
chr19-42	chr19	42580198	42580324	+	16.7	0.701	85	87	1.9	46.83	1.92e-110	13.37	2.35e-64
chr20-17	chr20	33906402	33906528	+	16.7	0.706	85	87	5.6	15.61	1.58e-70	11.89	5.54e-61
chr1-39	chr1	55909282	55909408	+	16.5	0.683	81	86	5.6	15.43	2.46e-69	19.21	4.73e-77
chr6-43	chr6	44017005	44017131	+	16.5	0.767	83	86	10.2	8.42	1.09e-48	6.97	4.41e-42
chr12-10	chr12	120672655	120672781	+	16.5	0.63	89	86	2.8	30.86	5e-94	7.52	1.72e-44
chr14-8	chr14	69162207	69162333	+	16.5	0.656	84	86	8.4	10.29	2.19e-55	11.45	5.11e-59
chr17-23	chr17	71395	71521	+	16.5	0.861	81	86	7.4	11.57	2.18e-59	12.76	9.78e-63
chr17-21	chr17	28690823	28690949	+	16.5	0.73	84	86	7.4	11.57	2.18e-59	15.37	3.38e-69
chr19-43	chr19	7571533	7571659	+	16.5	0.677	84	86	1.9	46.29	8.98e-109	11.51	3.41e-59
chr19-36	chr19	13096237	13096363	+	16.5	0.616	87	86	10.2	8.42	1.09e-48	8.82	1.11e-49
chr2-51	chr2	69902684	69902810	+	16.3	0.735	85	85	2.8	30.5	1.54e-92	26.22	3.74e-87
chr6-41	chr6	42194729	42194855	+	16.3	0.74	83	85	6.5	13.07	7.45e-63	9.24	1.31e-50
chr6-44	chr6	43484766	43484892	+	16.3	0.805	82	85	1.9	45.75	4.16e-107	8.97	1.17e-49
chr9-9	chr9	139470841	139470967	+	16.3	0.817	86	85	3.7	22.88	2.57e-82	10.78	1.12e-55
chr12-11	chr12	49463382	49463508	+	16.3	0.819	84	85	6.5	13.07	7.45e-63	24.94	2.28e-85
chr14-7	chr14	105957342	105957468	+	16.3	0.729	85	85	2.8	30.5	1.54e-92	11.03	4.18e-57
chr16-15	chr16	69083155	69083281	+	16.3	0.88	83	85	2.8	30.5	1.54e-92	24.2	2.58e-84
chr19-51	chr19	16978181	16978307	+	16.3	0.715	81	85	9.3	9.15	6.98e-51	9.97	1.65e-52
chr19-39	chr19	36236314	36236440	+	16.3	0.81	86	86	1.9	46.29	8.98e-109	10.99	2.43e-56
chr19-45	chr19	41220963	41221089	+	16.3	0.805	84	85	5.6	15.25	3.8e-68	11.37	3.93e-58
chr1-35	chr1	201458411	201458537	+	16.1	0.821	84	84	7.4	11.3	2.9e-57	19.79	1.9e-75
chr2-53	chr2	45864653	45864779	+	16.1	0.787	82	84	6.5	12.92	9.75e-62	17.28	1.23e-71
chr8-18	chr8	121840043	121840169	+	16.1	0.795	82	85	10.2	8.32	9.21e-48	17.09	1.29e-69
chr11-8	chr11	96123039	96123165	+	16.1	0.713	88	84	5.6	15.07	5.81e-67	16.49	4.86e-70
chr11-12	chr11	122954335	122954461	+	16.1	0.652	80	84	2.8	30.14	4.71e-91	18.04	3.97e-73
chr12-15	chr12	121124752	121124878	+	16.1	0.743	80	84	3.7	22.61	5.87e-81	14.64	5.6e-66
chr17-24	chr17	43302886	43303012	+	16.1	0.754	81	85	2.8	30.5	1.54e-92	10.97	1.24e-55
chr19-40	chr19	12847768	12847894	+	16.1	0.728	85	84	8.4	10.05	2.29e-53	10.33	4.9e-53
chr19-54	chr19	17186215	17186341	+	16.1	0.693	79	84	11.1	7.54	4.58e-44	7.25	7.81e-43
chr1-37	chr1	55894875	55895001	+	15.9	0.646	83	83	6.5	12.76	1.26e-60	13.91	1.74e-63
chr6-42	chr6	42325513	42325639	+	15.9	0.692	83	83	4.6	17.87	5.87e-72	10.86	2.68e-55
chr8-19	chr8	102110807	102110933	+	15.9	0.699	81	84	4.6	18.09	3.24e-73	9.29	4.84e-49
chr12-13	chr12	92987879	92988005	+	15.9	0.686	80	83	11.1	7.45	3.46e-43	14.09	6.38e-64
chr17-22	chr17	39844927	39845053	+	15.9	0.772	83	84	2.8	30.14	4.71e-91	20.35	2.08e-76
chr17-25	chr17	43225732	43225858	+	15.9	0.693	80	84	4.6	18.09	3.24e-73	15.32	5.76e-66
chr1-36	chr1	39564463	39564589	+	15.7	0.654	83	82	6.5	12.61	1.61e-59	13.31	1.41e-60
chr2-58	chr2	28200923	28201049	+	15.7	0.649	80	83	1.9	44.67	8.61e-104	17.32	4.56e-70
chr6-46	chr6	37321667	37321793	+	15.7	0.692	80	82	17.6	4.65	9.86e-29	9.05	8.09e-49
chr6-47	chr6	43692880	43693006	+	15.7	0.662	80	83	5.6	14.89	8.76e-66	9.58	4.94e-50
chr10-25	chr10	13545902	13546028	+	15.7	0.707	82	82	5.6	14.71	1.31e-64	17.18	8.55e-70
chr10-27	chr10	101666338	101666464	+	15.7	0.783	79	82	7.4	11.03	3.67e-55	14.29	1.19e-63
chr14-9	chr14	50507274	50507400	+	15.7	0.756	81	82	5.6	14.71	1.31e-64	8.31	4.1e-46
chr14-15	chr14	55136463	55136589	+	15.7	0.702	77	82	8.4	9.81	2.29e-51	9.33	8.82e-50
chr16-14	chr16	85801368	85801494	+	15.7	0.802	87	83	6.5	12.76	1.26e-60	23.79	8.29e-81
chr19-50	chr19	11485585	11485711	+	15.7	0.727	81	82	11.1	7.36	2.58e-42	7.84	8.89e-44
chr19-48	chr19	17970468	17970594	+	15.7	0.723	83	82	5.6	14.71	1.31e-64	9.53	7.68e-50
chr19-55	chr19	58962798	58962924	+	15.7	0.758	79	82	12.1	6.79	7.32e-40	11.72	4.06e-57
chr20-18	chr20	44992590	44992716	+	15.7	0.685	81	82	0.9	88.27	1.97e-126	11.8	2.33e-57
chr11-10	chr11	59383763	59383889	+	15.6	0.609	83	82	4.6	17.65	1.05e-70	14.89	3.12e-64
chr12-14	chr12	111051822	111051948	+	15.6	0.795	80	82	12.1	6.79	7.32e-40	15.43	2.03e-65
chr14-10	chr14	65569205	65569331	+	15.6	0.815	81	81	6.5	12.46	2.03e-58	17.3	3.43e-69
chr14-11	chr14	105219274	105219400	+	15.6	0.642	79	81	5.6	14.53	1.92e-63	11.49	8.19e-56
chr1-43	chr1	28189769	28189895	+	15.4	0.7	78	80	4.6	17.22	3.24e-68	15.59	3.62e-64
chr5-12	chr5	1522231	1522357	+	15.4	0.746	80	81	6.5	12.46	2.03e-58	15.06	7.8e-64
chr6-48	chr6	4402829	4402955	+	15.4	0.73	79	80	8.4	9.57	2.19e-49	11.87	8.23e-55
chr6-50	chr6	35453251	35453377	+	15.4	0.63	78	80	10.2	7.83	3.28e-43	5.16	1.33e-30
chr6-58	chr6	44026294	44026420	+	15.4	0.58	77	81	5.6	14.53	1.92e-63	6.95	1.28e-39
chr7-13	chr7	151442531	151442657	+	15.4	0.752	78	80	5.6	14.35	2.8e-62	14.36	2.66e-62
chr9-13	chr9	129567135	129567261	+	15.4	0.74	78	80	8.4	9.57	2.19e-49	18.03	1.04e-69
chr17-30	chr17	43565154	43565280	+	15.4	0.752	77	80	4.6	17.22	3.24e-68	24.01	3.38e-79
chr17-27	chr17	56267319	56267445	+	15.4	0.738	78	80	2.8	28.71	3.62e-85	11.98	1.76e-56
chr18-20	chr18	19612447	19612573	+	15.4	0.653	82	80	6.5	12.3	2.54e-57	17.28	2.58e-68
chr19-56	chr19	12787264	12787390	+	15.4	0.8	77	80	14.9	5.38	3.52e-32	11.62	1.63e-55
chr19-53	chr19	38791479	38791605	+	15.4	0.704	80	81	7.4	10.9	4.05e-54	12.62	4.01e-58
chr6-77	chr6	31430819	31430945	+	15.2	0.784	72	80	7.4	10.77	4.42e-53	11.98	4.07e-55
chr6-52	chr6	40995565	40995691	+	15.2	0.756	78	79	12.1	6.54	2.22e-37	7.31	1.19e-40
chr6-62	chr6	42419225	42419351	+	15.2	0.652	76	80	12.1	6.62	3.35e-38	6.01	6.34e-35
chr6-63	chr6	43979889	43980015	+	15.2	0.618	76	79	7.4	10.63	4.76e-52	7.42	1.34e-40
chr6-64	chr6	44009625	44009751	+	15.2	0.721	76	79	4.6	17.01	5.58e-67	5.63	2.97e-32
chr8-23	chr8	116439849	116439975	+	15.2	0.737	75	80	5.6	14.35	2.8e-62	23.9	4.52e-78
chr9-12	chr9	19380180	19380306	+	15.2	0.831	80	79	2.8	28.35	1.04e-83	33.02	8.97e-89
chr9-11	chr9	37948154	37948280	+	15.2	0.758	81	79	4.6	17.01	5.58e-67	11.27	7.21e-54
chr14-16	chr14	68973598	68973724	+	15.2	0.724	76	80	11.1	7.18	1.39e-40	12.09	4.46e-56
chr17-28	chr17	79369138	79369264	+	15.2	0.673	78	79	6.5	12.15	3.12e-56	15.35	6.8e-63
chr18-22	chr18	55785404	55785530	+	15.2	0.808	77	81	5.6	14.53	1.92e-63	35.25	7.91e-90
chr20-19	chr20	32077622	32077748	+	15.2	0.715	78	79	7.4	10.63	4.76e-52	16.92	8.28e-67
chr1-56	chr1	31296825	31296951	+	15	0.795	72	78	3.7	20.99	6.56e-73	12.43	3.03e-56
chr1-42	chr1	153606891	153607017	+	15	0.718	79	78	5.6	13.99	5.7e-60	14.2	1.97e-60
chr2-65	chr2	91786092	91786218	+	15	0.687	74	78	13.9	5.6	1.65e-32	4.47	2.21e-26
chr6-60	chr6	30788115	30788241	+	15	0.679	76	78	9.3	8.4	2.94e-44	9.77	3.27e-48
chr6-51	chr6	36547526	36547652	+	15	0.625	78	78	10.2	7.63	1.99e-41	7.7	1.15e-41
chr8-24	chr8	142164386	142164512	+	15	0.695	75	78	5.6	13.99	5.7e-60	10.24	2.84e-50
chr14-13	chr14	51865599	51865725	+	15	0.637	78	78	4.6	16.79	9.5e-66	10.95	2.6e-52
chr16-17	chr16	48160991	48161117	+	15	0.658	79	78	2.8	27.99	2.95e-82	12.71	5.89e-57
chr19-57	chr19	8578554	8578680	+	15	0.664	76	79	5.6	14.17	4.02e-61	11.63	7.62e-53
chr19-58	chr19	10230552	10230678	+	15	0.826	76	79	2.8	28.35	1.04e-83	13.73	1.25e-58
chr1-52	chr1	27618807	27618933	+	14.8	0.632	75	77	2.8	27.63	8.25e-81	14.49	2.57e-60
chr1-53	chr1	220445810	220445936	+	14.8	0.821	75	77	3.7	20.72	1.38e-71	14.96	1.58e-60
chr2-61	chr2	220363519	220363645	+	14.8	0.649	77	77	7.4	10.36	5.33e-50	14.29	7.23e-60
chr4-16	chr4	189552406	189552532	+	14.8	0.712	75	77	10.2	7.54	1.52e-40	19.56	9.37e-70
chr6-55	chr6	14711651	14711777	+	14.8	0.652	77	77	6.5	11.84	4.56e-54	6.68	4.47e-37
chr6-53	chr6	42419537	42419663	+	14.8	0.622	78	77	10.2	7.54	1.52e-40	5.92	1.14e-33
chr8-31	chr8	142086282	142086408	+	14.8	0.709	71	77	4.6	16.58	1.6e-64	11.7	5.04e-53
chr11-17	chr11	65187618	65187744	+	14.8	0.667	75	77	5.6	13.82	7.98e-59	6.71	1e-36
chr12-19	chr12	110389683	110389809	+	14.8	0.667	76	78	4.6	16.79	9.5e-66	12.47	1.17e-55
chr13-1	chr13	98085186	98085312	+	14.8	0.727	77	77	2.8	27.63	8.25e-81	25.05	1.19e-77
chr17-29	chr17	38444047	38444173	+	14.8	0.715	77	78	6.5	12	3.8e-55	15.79	5.3e-63
chr17-31	chr17	62988578	62988704	+	14.8	0.729	76	77	3.7	20.72	1.38e-71	14.12	1.69e-59
chr19-64	chr19	39936160	39936286	+	14.8	0.746	74	77	5.6	13.82	7.98e-59	9.73	1.63e-47
chr20-27	chr20	35580196	35580322	+	14.8	0.708	71	77	6.5	11.84	4.56e-54	14.15	1.43e-59
chr1-51	chr1	28099533	28099659	+	14.6	0.798	76	76	2.8	27.27	2.28e-79	15.93	1.13e-61
chr1-49	chr1	59249709	59249835	+	14.6	0.722	77	76	5.6	13.64	1.1e-57	15.71	4.76e-62
chr1-46	chr1	151254479	151254605	+	14.6	0.678	78	78	5.6	13.99	5.7e-60	14.62	7.83e-60
chr4-14	chr4	103749296	103749422	+	14.6	0.695	78	76	4.6	16.36	2.65e-63	14.03	1.45e-58
chr6-67	chr6	37467642	37467768	+	14.6	0.714	75	76	13	5.84	6.75e-33	9.23	6.01e-46
chr8-21	chr8	124428609	124428735	+	14.6	0.696	76	77	2.8	27.63	8.25e-81	11.89	1.66e-53
chr9-14	chr9	75058352	75058478	+	14.6	0.775	77	76	4.6	16.36	2.65e-63	12.28	1.69e-54
chr11-14	chr11	68843081	68843207	+	14.6	0.681	77	77	2.8	27.63	8.25e-81	8.48	1.91e-43
chr11-15	chr11	107328579	107328705	+	14.6	0.782	76	76	3.7	20.45	2.86e-70	24.93	1.62e-76
chr12-20	chr12	91749267	91749393	+	14.6	0.763	75	77	7.4	10.36	5.33e-50	24.31	1e-75
chr12-22	chr12	112563170	112563296	+	14.6	0.721	74	77	10.2	7.54	1.52e-40	10.78	6.55e-50
chr14-17	chr14	91703701	91703827	+	14.6	0.8	75	76	6.5	11.69	5.41e-53	13.88	1.72e-57
chr19-60	chr19	11670153	11670279	+	14.6	0.655	76	76	5.6	13.64	1.1e-57	11.17	1.27e-51
chr19-61	chr19	17371742	17371868	+	14.6	0.628	76	77	7.4	10.36	5.33e-50	8.91	6.57e-45
chr20-21	chr20	49952000	49952126	+	14.6	0.662	75	76	4.6	16.36	2.65e-63	10.88	3.48e-50
chr1-50	chr1	17231452	17231578	+	14.4	0.651	76	75	8.4	8.97	1.56e-44	14.72	2.83e-59
chr1-48	chr1	42097770	42097896	+	14.4	0.85	77	75	6.5	11.53	6.33e-52	15.68	1.33e-59
chr2-69	chr2	91787015	91787141	+	14.4	0.577	71	75	12.1	6.21	3.8e-34	4.56	5.79e-26
chr6-74	chr6	829766	829892	+	14.4	0.736	72	75	5.6	13.46	1.51e-56	13.17	9.77e-54
chr6-66	chr6	30853900	30854026	+	14.4	0.64	75	75	13.9	5.38	2.8e-30	7.36	7.07e-39
chr6-49	chr6	33257010	33257136	+	14.4	0.738	78	76	13.9	5.45	5.12e-31	9.27	1.74e-45
chr8-29	chr8	101635678	101635804	+	14.4	0.736	71	75	2.8	26.91	6.23e-78	12.9	2.83e-55
chr8-22	chr8	131012274	131012400	+	14.4	0.725	76	77	13	5.92	1.14e-33	8.49	6.23e-43
chr11-13	chr11	82969010	82969136	+	14.4	0.711	79	76	5.6	13.64	1.1e-57	19.5	6.83e-68
chr19-62	chr19	6737825	6737951	+	14.4	0.679	74	76	5.6	13.64	1.1e-57	9.3	1.41e-45
chr19-63	chr19	10946396	10946522	+	14.4	0.638	74	75	3.7	20.18	5.84e-69	10.32	1.25e-48
chr19-66	chr19	13991097	13991223	+	14.4	0.593	73	75	13	5.77	3.95e-32	7.48	2.41e-39
chr19-68	chr19	14800481	14800607	+	14.4	0.725	71	76	4.6	16.36	2.65e-63	12.72	1.89e-53
chr20-24	chr20	25203907	25204033	+	14.4	0.674	72	78	5.6	13.99	5.7e-60	13.02	7.92e-55
chr20-26	chr20	35234001	35234127	+	14.4	0.731	71	75	7.4	10.09	5.66e-48	9.92	7.44e-47
chr20-20	chr20	36772638	36772764	+	14.4	0.721	77	76	4.6	16.36	2.65e-63	9.04	9.35e-45
chr21-12	chr21	37575921	37576047	+	14.4	0.835	75	75	3.7	20.18	5.84e-69	17.89	3.17e-65
chr1-44	chr1	110363894	110364020	+	14.2	0.694	78	76	13.9	5.45	5.12e-31	8.3	3.35e-41
chr1-58	chr1	152020535	152020661	+	14.2	0.627	71	75	1.9	40.37	9.67e-91	11.81	5.85e-52
chr2-64	chr2	36214757	36214883	+	14.2	0.731	74	74	1.9	39.83	3.9e-89	26.76	9.74e-77
chr2-68	chr2	42329203	42329329	+	14.2	0.737	72	74	4.6	15.93	7.01e-61	10.77	2.95e-49
chr3-8	chr3	46027879	46028005	+	14.2	0.779	73	74	8.4	8.85	1.4e-43	13.83	1.24e-56
chr3-7	chr3	167452665	167452791	+	14.2	0.686	74	74	7.4	9.96	5.72e-47	15.59	1.94e-59
chr4-18	chr4	7069831	7069957	+	14.2	0.756	73	75	4.6	16.15	4.34e-62	12.4	2.18e-53
chr6-68	chr6	7058641	7058767	+	14.2	0.691	74	74	11.1	6.64	1.58e-35	11.24	1.73e-50
chr6-57	chr6	31620720	31620846	+	14.2	0.696	77	74	4.6	15.93	7.01e-61	8.84	5.59e-43
chr6-72	chr6	33807949	33808075	+	14.2	0.684	73	74	7.4	9.96	5.72e-47	9.49	1.37e-45
chr6-86	chr6	37101987	37102113	+	14.2	0.687	71	74	10.2	7.24	6.31e-38	5.06	2.62e-28
chr6-70	chr6	41888817	41888943	+	14.2	0.674	74	74	13	5.69	2.29e-31	6.83	2.57e-36
chr6-79	chr6	137540543	137540669	+	14.2	0.819	72	74	2.8	26.55	1.68e-76	19.44	4.98e-66
chr6-65	chr6	167354329	167354455	+	14.2	0.814	76	75	8.4	8.97	1.56e-44	16.2	2.16e-61
chr9-17	chr9	35072693	35072819	+	14.2	0.723	74	75	5.6	13.46	1.51e-56	9.78	1.85e-46
chr10-31	chr10	75668883	75669009	+	14.2	0.672	74	75	7.4	10.09	5.66e-48	9.48	1.53e-45
chr17-34	chr17	41622037	41622163	+	14.2	0.731	72	75	3.7	20.18	5.84e-69	10.06	2.95e-47
chr17-39	chr17	70359077	70359203	+	14.2	0.709	70	75	8.4	8.97	1.56e-44	8.72	3.84e-43
chr1-54	chr1	153517643	153517769	+	14	0.72	74	76	6.5	11.69	5.41e-53	7.25	1.85e-37
chr4-19	chr4	170146733	170146859	+	14	0.777	73	73	7.4	9.82	5.71e-46	27.55	1.29e-76
chr4-15	chr4	183499678	183499804	+	14	0.767	75	73	1.9	39.29	1.56e-87	27.28	2.54e-76
chr6-98	chr6	20516688	20516814	+	14	0.685	68	73	6.5	11.23	8.33e-50	10.6	1.62e-47
chr6-56	chr6	30684962	30685088	+	14	0.647	77	74	2.8	26.55	1.68e-76	8.9	3.73e-43
chr8-28	chr8	128911802	128911928	+	14	0.735	72	73	6.5	11.23	8.33e-50	12.47	7.27e-53
chr11-18	chr11	74384099	74384225	+	14	0.674	74	73	1.9	39.29	1.56e-87	12.28	2.03e-52
chr14-24	chr14	71610277	71610403	+	14	0.536	69	73	4.6	15.72	1.12e-59	8.6	3.35e-42
chr14-21	chr14	73493928	73494054	+	14	0.635	72	74	6.5	11.38	7.31e-51	16.53	1.52e-59
chr14-18	chr14	74551126	74551252	+	14	0.621	74	74	2.8	26.55	1.68e-76	10.16	2.6e-46
chr20-25	chr20	48388953	48389079	+	14	0.794	72	73	6.5	11.23	8.33e-50	9.75	1.47e-44
chr2-70	chr2	70589879	70590005	+	13.8	0.827	70	72	3.7	19.38	4.62e-65	14.37	1.61e-55
chr3-11	chr3	66023059	66023185	+	13.8	0.865	70	72	3.7	19.38	4.62e-65	14.1	1.03e-55
chr4-27	chr4	1391353	1391479	+	13.8	0.911	65	72	10.2	7.05	3.28e-36	13.89	2.81e-55
chr6-71	chr6	20401871	20401997	+	13.8	0.694	73	72	4.6	15.5	1.76e-58	9.82	9.38e-45
chr6-108	chr6	30720192	30720318	+	13.8	0.639	65	72	6.5	11.07	9.36e-49	6.38	8.22e-32
chr6-78	chr6	41814581	41814707	+	13.8	0.752	72	73	8.4	8.73	1.24e-42	10.89	2.79e-48
chr8-30	chr8	128093184	128093310	+	13.8	0.705	71	73	12.1	6.04	1.46e-32	16.61	1.66e-60
chr12-21	chr12	91353491	91353617	+	13.8	0.842	74	72	5.6	12.92	3.54e-53	21.69	2e-68
chr14-22	chr14	50566181	50566307	+	13.8	0.659	71	72	9.3	7.75	8.56e-39	11.61	4.09e-50
chr14-23	chr14	101159556	101159682	+	13.8	0.618	70	73	4.6	15.72	1.12e-59	9.2	6.03e-43
chr16-20	chr16	28961994	28962120	+	13.8	0.664	74	72	0.9	77.51	3.19e-107	14.13	8.7e-56
chr17-36	chr17	28256593	28256719	+	13.8	0.705	70	72	2.8	25.84	1.17e-73	15.34	3.64e-58
chr19-59	chr19	10491351	10491477	+	13.8	0.689	76	73	3.7	19.65	2.35e-66	10.3	4.51e-46
chr20-28	chr20	43588376	43588502	+	13.8	0.783	70	72	6.5	11.07	9.36e-49	14.46	1.86e-56
chr1-61	chr1	11866176	11866302	+	13.6	0.742	69	71	4.6	15.29	2.73e-57	8.37	8.01e-40
chr2-71	chr2	118870644	118870770	+	13.6	0.756	70	71	4.6	15.29	2.73e-57	17.09	1.62e-60
chr3-9	chr3	79068577	79068703	+	13.6	0.669	73	71	4.6	15.29	2.73e-57	14.17	2.32e-54
chr4-21	chr4	190656268	190656394	+	13.6	0.613	71	71	4.6	15.29	2.73e-57	5.65	3.35e-29
chr5-15	chr5	60594625	60594751	+	13.6	0.708	74	72	3.7	19.38	4.62e-65	11.33	9.29e-49
chr5-18	chr5	132202216	132202342	+	13.6	0.794	69	71	2.8	25.48	3.02e-72	12.81	3.23e-52
chr5-16	chr5	157286139	157286265	+	13.6	0.808	70	71	4.6	15.29	2.73e-57	23.69	4.3e-70
chr6-88	chr6	1325866	1325992	+	13.6	0.634	70	73	6.5	11.23	8.33e-50	7.34	2.44e-36
chr6-81	chr6	22236886	22237012	+	13.6	0.622	71	71	8.4	8.49	9.35e-41	10.95	1.73e-46
chr6-83	chr6	30712343	30712469	+	13.6	0.641	71	71	9.3	7.64	6.65e-38	4.64	9.06e-25
chr6-89	chr6	35368754	35368880	+	13.6	0.57	70	71	12.1	5.88	5.27e-31	5.73	2.37e-30
chr6-69	chr6	37225425	37225551	+	13.6	0.677	74	72	10.2	7.05	3.28e-36	8.54	6.39e-41
chr8-27	chr8	144300548	144300674	+	13.6	0.592	73	73	1.9	39.29	1.56e-87	6.39	3.74e-33
chr10-32	chr10	96118366	96118492	+	13.6	0.718	72	71	6.5	10.92	1.04e-47	16.74	4.16e-59
chr12-31	chr12	120685430	120685556	+	13.6	0.754	67	71	1.9	38.22	2.37e-84	9.06	1.55e-42
chr12-33	chr12	122502864	122502990	+	13.6	0.774	67	71	9.3	7.64	6.65e-38	10.95	8.56e-48
chr17-37	chr17	47492208	47492334	+	13.6	0.72	70	72	5.6	12.92	3.54e-53	16.48	1.85e-59
chr17-40	chr17	70461862	70461988	+	13.6	0.659	69	71	3.7	19.11	8.97e-64	11.15	1.2e-47
chr17-47	chr17	73081851	73081977	+	13.6	0.726	66	71	4.6	15.29	2.73e-57	10.53	4.73e-46
chr19-70	chr19	14638488	14638614	+	13.6	0.742	70	71	6.5	10.92	1.04e-47	9.06	1.55e-42
chr19-72	chr19	39184162	39184288	+	13.6	0.761	69	71	4.6	15.29	2.73e-57	12.93	1.75e-52
chr19-73	chr19	40949039	40949165	+	13.6	0.757	69	71	7.4	9.55	5.45e-44	10.33	1.59e-45
chr20-31	chr20	55614625	55614751	+	13.6	0.664	69	71	7.4	9.55	5.45e-44	10.68	4.43e-47
chr20-34	chr20	61335957	61336083	+	13.6	0.733	67	71	13	5.46	4.08e-29	7.59	1.01e-37
chr1-73	chr1	16840832	16840958	+	13.4	0.8	66	70	8.4	8.37	7.96e-40	14.15	1.42e-53
chr1-62	chr1	27718827	27718953	+	13.4	0.761	69	70	2.8	25.12	7.69e-71	11.65	7.21e-49
chr1-59	chr1	33458195	33458321	+	13.4	0.752	70	71	2.8	25.48	3.02e-72	10.84	7.29e-47
chr1-89	chr1	154947013	154947139	+	13.4	0.766	63	70	10.2	6.85	1.61e-34	9.98	1.33e-44
chr1-67	chr1	234743964	234744090	+	13.4	0.718	68	70	1.9	37.68	9.06e-83	12.45	1.01e-50
chr3-18	chr3	193807379	193807505	+	13.4	0.774	66	70	7.4	9.42	5.22e-43	13.18	1.36e-51
chr4-23	chr4	106013711	106013837	+	13.4	0.785	70	70	4.6	15.07	4.17e-56	17.88	3.82e-60
chr5-17	chr5	179125783	179125909	+	13.4	0.723	70	70	5.6	12.56	5.83e-51	12.96	7.8e-52
chr6-75	chr6	1917926	1918052	+	13.4	0.737	72	71	7.4	9.55	5.45e-44	13.81	1.24e-53
chr6-97	chr6	15289731	15289857	+	13.4	0.814	68	72	7.4	9.69	5.62e-45	15.16	2.86e-56
chr6-76	chr6	21381951	21382077	+	13.4	0.728	72	71	6.5	10.92	1.04e-47	11.63	8.27e-49
chr6-82	chr6	30614695	30614821	+	13.4	0.818	71	70	8.4	8.37	7.96e-40	11.96	1.36e-49
chr6-84	chr6	31704287	31704413	+	13.4	0.84	71	70	6.5	10.77	1.13e-46	6.6	1.44e-33
chr6-93	chr6	35722786	35722912	+	13.4	0.708	69	70	7.4	9.42	5.22e-43	6.74	4.15e-34
chr6-85	chr6	36288356	36288482	+	13.4	0.674	71	71	12.1	5.88	5.27e-31	6.89	1.16e-34
chr6-87	chr6	42104723	42104849	+	13.4	0.736	71	70	13.9	5.02	1.12e-26	6.76	3.58e-34
chr6-94	chr6	52368947	52369073	+	13.4	0.656	69	70	5.6	12.56	5.83e-51	10.03	4.21e-44
chr8-34	chr8	102373136	102373262	+	13.4	0.706	67	70	7.4	9.42	5.22e-43	8.32	1.17e-39
chr8-32	chr8	143303729	143303855	+	13.4	0.681	71	70	7.4	9.42	5.22e-43	5.66	1.28e-29
chr10-36	chr10	13908285	13908411	+	13.4	0.616	68	70	3.7	18.84	1.72e-62	14.17	2.32e-54
chr10-33	chr10	105610133	105610259	+	13.4	0.708	70	70	2.8	25.12	7.69e-71	13.47	6.3e-53
chr12-25	chr12	120639012	120639138	+	13.4	0.662	70	70	10.2	6.85	1.61e-34	13.38	2.73e-51
chr14-20	chr14	74111645	74111771	+	13.4	0.739	73	71	13	5.46	4.08e-29	15.64	3.72e-57
chr17-38	chr17	61594465	61594591	+	13.4	0.791	70	70	8.4	8.37	7.96e-40	10.99	6.04e-46
chr19-65	chr19	8420545	8420671	+	13.4	0.63	73	72	10.2	7.05	3.28e-36	7.85	4.12e-38
chr19-69	chr19	8488938	8489064	+	13.4	0.752	70	70	6.5	10.77	1.13e-46	12.04	8.87e-50
chr19-67	chr19	8943520	8943646	+	13.4	0.71	72	70	5.6	12.56	5.83e-51	12.21	8.72e-49
chr19-77	chr19	14513260	14513386	+	13.4	0.752	67	70	6.5	10.77	1.13e-46	7.66	1.81e-37
chr20-39	chr20	32988770	32988896	+	13.4	0.612	65	70	2.8	25.12	7.69e-71	15.29	1.65e-56
chr20-22	chr20	36701927	36702053	+	13.4	0.707	74	71	6.5	10.92	1.04e-47	11.51	7.35e-48
chr20-23	chr20	37054789	37054915	+	13.4	0.705	73	72	3.7	19.38	4.62e-65	8.26	1.87e-39
chr1-63	chr1	32757419	32757545	+	13.2	0.669	68	69	5.6	12.38	7.34e-50	12.29	5.64e-49
chr1-64	chr1	44287876	44288002	+	13.2	0.847	68	69	1.9	37.14	3.42e-81	17.76	5.89e-60
chr1-66	chr1	201521076	201521202	+	13.2	0.734	68	69	8.4	8.25	6.68e-39	14.01	2.79e-53
chr1-105	chr1	232674132	232674258	+	13.2	0.816	61	71	0.9	76.43	2.48e-105	18.75	1.28e-60
chr3-13	chr3	58512481	58512607	+	13.2	0.859	67	69	4.6	14.86	6.3e-55	13.65	1.45e-52
chr6-134	chr6	4459459	4459585	+	13.2	0.745	61	69	10.2	6.75	1.11e-33	12.7	3.68e-49
chr6-80	chr6	7692490	7692616	+	13.2	0.684	71	70	5.6	12.56	5.83e-51	10.54	1.88e-45
chr6-92	chr6	35382947	35383073	+	13.2	0.638	69	70	8.4	8.37	7.96e-40	5.91	6.99e-30
chr6-104	chr6	41570945	41571071	+	13.2	0.708	67	69	9.3	7.43	3.85e-36	6.92	2.58e-34
chr6-95	chr6	57377076	57377202	+	13.2	0.695	69	69	6.5	10.61	1.22e-45	10.62	1.15e-45
chr10-34	chr10	5593809	5593935	+	13.2	0.717	69	69	8.4	8.25	6.68e-39	8.34	1.25e-38
chr12-39	chr12	112123763	112123889	+	13.2	0.827	65	69	8.4	8.25	6.68e-39	14.48	1.86e-53
chr12-32	chr12	121826223	121826349	+	13.2	0.661	67	69	7.4	9.28	4.92e-42	11.97	6.09e-49
chr12-26	chr12	122224436	122224562	+	13.2	0.68	69	69	2.8	24.76	1.93e-69	8.65	3.77e-40
chr14-26	chr14	90722818	90722944	+	13.2	0.724	68	71	2.8	25.48	3.02e-72	13.24	9.94e-52
chr17-44	chr17	38642551	38642677	+	13.2	0.638	66	69	8.4	8.25	6.68e-39	10.08	2.97e-44
chr19-71	chr19	9938501	9938627	+	13.2	0.817	69	71	8.4	8.49	9.35e-41	12.16	2.25e-49
chr19-81	chr19	18668456	18668582	+	13.2	0.734	65	69	5.6	12.38	7.34e-50	9.3	4.55e-42
chr20-32	chr20	30743091	30743217	+	13.2	0.634	68	69	8.4	8.25	6.68e-39	9.95	6.7e-44
chr20-29	chr20	33759535	33759661	+	13.2	0.832	69	69	11.1	6.19	1.8e-31	11.83	6.36e-48
chr1-82	chr1	162511672	162511798	+	13.1	0.669	64	70	9.3	7.54	5.09e-37	14.25	5.22e-53
chr2-81	chr2	133044172	133044298	+	13.1	0.776	64	68	15.8	4.31	2.25e-22	8.07	8.78e-38
chr3-10	chr3	57969544	57969670	+	13.1	0.656	70	68	5.6	12.2	9.09e-49	10.53	8.47e-45
chr5-21	chr5	95179041	95179167	+	13.1	0.845	66	68	1.9	36.6	1.27e-79	14.17	7.33e-53
chr6-110	chr6	36553466	36553592	+	13.1	0.711	65	68	10.2	6.65	7.5e-33	8.26	2.2e-38
chr6-99	chr6	41909902	41910028	+	13.1	0.717	68	68	10.2	6.65	7.5e-33	7.6	3.24e-36
chr6-124	chr6	42067583	42067709	+	13.1	0.669	63	69	13	5.31	1.21e-27	5.65	8.76e-29
chr6-100	chr6	43667441	43667567	+	13.1	0.711	68	68	3.7	18.3	6.01e-60	8.57	2.44e-39
chr6-101	chr6	73121999	73122125	+	13.1	0.8	68	68	7.4	9.15	4.58e-41	14.51	9.57e-53
chr8-35	chr8	128864392	128864518	+	13.1	0.728	67	68	4.6	14.64	9.36e-54	9.52	3.99e-42
chr10-39	chr10	73828949	73829075	+	13.1	0.709	68	70	2.8	25.12	7.69e-71	11.27	1.26e-46
chr11-22	chr11	65239629	65239755	+	13.1	0.732	69	69	12.1	5.71	1.81e-29	11.42	2.55e-46
chr11-19	chr11	68147927	68148053	+	13.1	0.786	72	69	8.4	8.25	6.68e-39	11.49	3.79e-47
chr12-24	chr12	54718824	54718950	+	13.1	0.835	71	70	2.8	25.12	7.69e-71	21.15	5.32e-64
chr16-25	chr16	67891797	67891923	+	13.1	0.713	66	68	3.7	18.3	6.01e-60	11.4	1.31e-45
chr18-23	chr18	59854263	59854389	+	13.1	0.821	69	68	3.7	18.3	6.01e-60	33.04	1.1e-76
chr19-74	chr19	48857941	48858067	+	13.1	0.644	68	68	4.6	14.64	9.36e-54	10.99	6.04e-46
chr20-37	chr20	3749542	3749668	+	13.1	0.653	65	68	2.8	24.4	4.79e-68	13.56	6.35e-51
chr20-35	chr20	30181113	30181239	+	13.1	0.712	66	68	8.4	8.13	5.52e-38	9.72	1.17e-42
chr20-30	chr20	39958322	39958448	+	13.1	0.707	69	69	4.6	14.86	6.3e-55	11.62	1.92e-47
chr1-85	chr1	45965891	45966017	+	12.9	0.776	63	67	0.9	72.13	7.75e-98	16.64	1.75e-56
chr1-71	chr1	101096723	101096849	+	12.9	0.63	67	67	3.7	18.03	1.1e-58	14.1	3.25e-51
chr2-76	chr2	101508415	101508541	+	12.9	0.611	66	67	3.7	18.03	1.1e-58	10.19	2.62e-43
chr4-24	chr4	2243834	2243960	+	12.9	0.681	68	67	3.7	18.03	1.1e-58	14.39	1.61e-52
chr4-25	chr4	83822214	83822340	+	12.9	0.708	67	67	3.7	18.03	1.1e-58	13.02	7.99e-50
chr5-19	chr5	133702816	133702942	+	12.9	0.792	67	68	3.7	18.3	6.01e-60	17.08	3.43e-57
chr6-102	chr6	31528365	31528491	+	12.9	0.767	67	67	6.5	10.3	1.36e-43	7.75	3.19e-36
chr6-91	chr6	31633616	31633742	+	12.9	0.657	69	67	4.6	14.43	1.37e-52	6.89	7.5e-32
chr6-107	chr6	44649707	44649833	+	12.9	0.65	66	68	5.6	12.2	9.09e-49	9.55	5.09e-41
chr9-19	chr9	34458757	34458883	+	12.9	0.68	66	67	5.6	12.02	1.11e-47	9.23	3.97e-40
chr10-40	chr10	99355949	99356075	+	12.9	0.796	66	68	5.6	12.2	9.09e-49	12.22	2.02e-47
chr10-41	chr10	103127368	103127494	+	12.9	0.69	66	67	6.5	10.3	1.36e-43	16.19	6.42e-55
chr11-33	chr11	7627038	7627164	+	12.9	0.629	64	68	4.6	14.64	9.36e-54	11.13	5.63e-45
chr11-20	chr11	27423358	27423484	+	12.9	0.706	69	67	4.6	14.43	1.37e-52	14.23	3.2e-52
chr11-24	chr11	45939695	45939821	+	12.9	0.725	67	67	4.6	14.43	1.37e-52	11.15	1.1e-45
chr11-21	chr11	65101258	65101384	+	12.9	0.838	69	67	2.8	24.04	1.17e-66	14.02	4.55e-51
chr11-32	chr11	78285913	78286039	+	12.9	0.769	65	67	5.6	12.02	1.11e-47	13.57	3.29e-50
chr14-25	chr14	54863545	54863671	+	12.9	0.681	68	67	8.4	8.01	4.5e-37	11.5	1.7e-46
chr17-48	chr17	966139	966265	+	12.9	0.779	65	67	13.9	4.81	1.38e-24	7.9	1.01e-36
chr17-49	chr17	8059642	8059768	+	12.9	0.721	65	67	5.6	12.02	1.11e-47	8.13	1.99e-37
chr17-50	chr17	39656421	39656547	+	12.9	0.667	65	67	7.4	9.02	4.19e-40	9.14	1.88e-40
chr17-46	chr17	43398407	43398533	+	12.9	0.722	66	67	7.4	9.02	4.19e-40	8.58	7.95e-39
chr19-78	chr19	8067425	8067551	+	12.9	0.812	66	67	5.6	12.02	1.11e-47	9.32	5.85e-41
chr19-76	chr19	12674923	12675049	+	12.9	0.683	67	67	3.7	18.03	1.1e-58	11.81	3.28e-47
chr19-79	chr19	15443311	15443437	+	12.9	0.821	66	67	8.4	8.01	4.5e-37	11.6	9.9e-47
chr20-38	chr20	32377505	32377631	+	12.9	0.824	65	67	5.6	12.02	1.11e-47	10.09	4.72e-43
chr1-70	chr1	45272953	45273079	+	12.7	0.651	67	66	6.5	10.15	1.41e-42	9.35	1.88e-40
chr1-83	chr1	170043837	170043963	+	12.7	0.739	64	66	2.8	23.68	2.81e-65	21.38	1.8e-62
chr2-73	chr2	238409378	238409504	+	12.7	0.733	67	66	5.6	11.84	1.34e-46	11.99	6.35e-47
chr3-16	chr3	40494923	40495049	+	12.7	0.697	66	67	8.4	8.01	4.5e-37	12.79	6.29e-48
chr3-14	chr3	113775497	113775623	+	12.7	0.809	67	66	2.8	23.68	2.81e-65	26.45	2.57e-68
chr6-96	chr6	4733239	4733365	+	12.7	0.77	68	66	5.6	11.84	1.34e-46	11.88	1.12e-46
chr6-105	chr6	25006709	25006835	+	12.7	0.738	66	66	7.4	8.88	3.79e-39	9.3	2.6e-40
chr6-114	chr6	27100482	27100608	+	12.7	0.579	64	67	4.6	14.43	1.37e-52	10.8	3.4e-44
chr6-90	chr6	28109508	28109634	+	12.7	0.695	69	66	6.5	10.15	1.41e-42	10.35	1.8e-42
chr6-127	chr6	30231803	30231929	+	12.7	0.572	62	67	7.4	9.02	4.19e-40	7.4	4.74e-34
chr6-106	chr6	41703360	41703486	+	12.7	0.77	66	66	9.3	7.1	1.52e-33	5.97	2.54e-29
chr6-111	chr6	159423538	159423664	+	12.7	0.73	65	66	2.8	23.68	2.81e-65	15.89	1.26e-53
chr7-18	chr7	61100229	61100355	+	12.7	0.661	64	66	13	5.07	1.74e-25	10.04	2.68e-42
chr9-21	chr9	34989542	34989668	+	12.7	0.7	65	67	3.7	18.03	1.1e-58	9.07	1.14e-39
chr9-23	chr9	101026153	101026279	+	12.7	0.828	64	66	2.8	23.68	2.81e-65	18.46	1.82e-58
chr10-37	chr10	25233893	25234019	+	12.7	0.716	68	66	6.5	10.15	1.41e-42	16.25	3.24e-54
chr11-26	chr11	14913820	14913946	+	12.7	0.75	66	66	1.9	35.52	1.68e-76	18.79	5.84e-59
chr11-27	chr11	64085016	64085142	+	12.7	0.813	66	66	4.6	14.21	1.98e-51	11.15	4.94e-45
chr11-28	chr11	111957505	111957631	+	12.7	0.824	66	66	4.6	14.21	1.98e-51	16.24	5.28e-55
chr12-29	chr12	110493508	110493634	+	12.7	0.658	67	66	3.7	17.76	1.99e-57	9.68	2.34e-41
chr17-53	chr17	17942580	17942706	+	12.7	0.768	63	66	5.6	11.84	1.34e-46	13.4	7.35e-50
chr18-24	chr18	12402912	12403038	+	12.7	0.75	66	66	2.8	23.68	2.81e-65	11.69	2.95e-46
chr19-84	chr19	14247860	14247986	+	12.7	0.76	64	66	7.4	8.88	3.79e-39	7.14	3.57e-33
chr20-43	chr20	42142927	42143053	+	12.7	0.648	62	66	3.7	17.76	1.99e-57	10.67	7.21e-44
chr20-36	chr20	49971576	49971702	+	12.7	0.658	66	67	8.4	8.01	4.5e-37	6.8	1.89e-32
chrX-14	chrX	149108584	149108710	+	12.7	0.624	68	66	0.9	71.05	5.59e-96	13.79	1.23e-50
chr1-77	chr1	21651135	21651261	+	12.5	0.565	65	66	1.9	35.52	1.68e-76	9.3	3.71e-39
chr1-74	chr1	28562453	28562579	+	12.5	0.808	66	65	7.4	8.75	3.37e-38	15.84	1.53e-53
chr1-94	chr1	28974992	28975118	+	12.5	0.769	62	65	7.4	8.75	3.37e-38	14.44	4.28e-51
chr1-75	chr1	40839254	40839380	+	12.5	0.732	66	66	5.6	11.84	1.34e-46	18.31	2.15e-57
chr1-87	chr1	75198694	75198820	+	12.5	0.667	63	66	6.5	10.15	1.41e-42	15.08	3e-52
chr1-65	chr1	162106748	162106874	+	12.5	0.739	68	67	3.7	18.03	1.1e-58	15.13	2.5e-52
chr1-76	chr1	203507325	203507451	+	12.5	0.726	66	66	9.3	7.1	1.52e-33	10.89	4.15e-43
chr1-91	chr1	205888237	205888363	+	12.5	0.701	63	66	4.6	14.21	1.98e-51	10.77	1.74e-43
chr1-60	chr1	207200635	207200761	+	12.5	0.805	70	68	5.6	12.2	9.09e-49	13.33	5.24e-49
chr2-74	chr2	47497009	47497135	+	12.5	0.653	66	65	2.8	23.32	6.67e-64	11.95	3.79e-46
chr2-75	chr2	101226881	101227007	+	12.5	0.757	66	66	6.5	10.15	1.41e-42	9.06	4.52e-39
chr3-21	chr3	31118800	31118926	+	12.5	0.641	63	66	7.4	8.88	3.79e-39	17.01	1.94e-55
chr3-12	chr3	48754646	48754772	+	12.5	0.667	67	65	4.6	13.99	2.82e-50	11.54	3.02e-45
chr3-15	chr3	170444529	170444655	+	12.5	0.746	67	66	2.8	23.68	2.81e-65	11.36	7.74e-45
chr3-17	chr3	172241261	172241387	+	12.5	0.655	66	66	0.9	71.05	5.59e-96	14.91	6.17e-52
chr4-30	chr4	113557994	113558120	+	12.5	0.735	63	66	5.6	11.84	1.34e-46	16.14	4.8e-54
chr5-24	chr5	171864707	171864833	+	12.5	0.559	63	66	4.6	14.21	1.98e-51	11.93	1.96e-45
chr5-20	chr5	173141776	173141902	+	12.5	0.719	67	65	2.8	23.32	6.67e-64	9.95	7.61e-41
chr6-126	chr6	16089737	16089863	+	12.5	0.766	62	65	2.8	23.32	6.67e-64	14.6	2.13e-51
chr6-145	chr6	32081768	32081894	+	12.5	0.736	60	65	6.5	10	1.43e-41	7.13	3.87e-33
chr6-123	chr6	35455850	35455976	+	12.5	0.664	63	65	8.4	7.77	2.86e-35	4.12	1.57e-20
chr6-116	chr6	36987089	36987215	+	12.5	0.691	64	65	11.1	5.83	2.45e-28	4.45	3.42e-22
chr6-119	chr6	52217163	52217289	+	12.5	0.697	64	65	6.5	10	1.43e-41	10.37	7.19e-42
chr6-133	chr6	119468292	119468418	+	12.5	0.818	62	65	4.6	13.99	2.82e-50	18.43	1.04e-56
chr7-20	chr7	155082852	155082978	+	12.5	0.695	64	65	1.9	34.99	5.96e-75	13.09	1.58e-48
chr11-29	chr11	10388378	10388504	+	12.5	0.667	65	65	3.7	17.49	3.53e-56	15.08	1.84e-51
chr11-37	chr11	48077442	48077568	+	12.5	0.727	63	65	4.6	13.99	2.82e-50	10.62	4.16e-43
chr11-120	chr11	50757846	50757972	+	12.5	0.719	48	66	6.5	10.15	1.41e-42	6.56	1.07e-30
chr11-31	chr11	72983090	72983216	+	12.5	0.729	65	65	4.6	13.99	2.82e-50	12.6	1.55e-47
chr12-34	chr12	28176572	28176698	+	12.5	0.75	66	65	1.9	34.99	5.96e-75	20.29	3.76e-60
chr12-28	chr12	90341728	90341854	+	12.5	0.76	67	65	4.6	13.99	2.82e-50	17.13	1.28e-55
chr12-37	chr12	94963995	94964121	+	12.5	0.731	65	65	9.3	7	1.08e-32	7.87	1.42e-35
chr12-42	chr12	105868531	105868657	+	12.5	0.685	63	65	8.4	7.77	2.86e-35	15.13	2.5e-52
chr12-46	chr12	111273283	111273409	+	12.5	0.828	62	65	4.6	13.99	2.82e-50	14.08	1.99e-50
chr12-27	chr12	121790299	121790425	+	12.5	0.716	68	66	8.4	7.89	3.61e-36	12.6	1.55e-47
chr14-27	chr14	50466017	50466143	+	12.5	0.669	65	65	8.4	7.77	2.86e-35	6.36	2.08e-30
chr16-28	chr16	74729850	74729976	+	12.5	0.798	61	65	1.9	34.99	5.96e-75	20.71	1.07e-60
chr17-45	chr17	42634508	42634634	+	12.5	0.63	66	65	5.6	11.66	1.59e-45	9.34	7.51e-40
chr19-86	chr19	6674984	6675110	+	12.5	0.612	63	65	5.6	11.66	1.59e-45	8.77	2.84e-38
chr19-87	chr19	7936636	7936762	+	12.5	0.631	63	65	1.9	34.99	5.96e-75	6.64	5.59e-31
chr19-82	chr19	7985708	7985834	+	12.5	0.774	64	65	0.9	69.97	3.97e-94	7.82	2.02e-35
chr19-90	chr19	18570782	18570908	+	12.5	0.703	63	66	8.4	7.89	3.61e-36	7.9	1.19e-35
chr19-104	chr19	40315205	40315331	+	12.5	0.705	60	66	3.7	17.76	1.99e-57	10.81	2.74e-42
chr1-69	chr1	9498890	9499016	+	12.3	0.656	67	64	5.6	11.48	1.85e-44	13.3	3.18e-48
chr1-78	chr1	153963118	153963244	+	12.3	0.824	65	64	7.4	8.61	2.95e-37	13.82	3.31e-49
chr2-78	chr2	113998606	113998732	+	12.3	0.741	65	64	1.9	34.45	2.09e-73	13.72	2.81e-48
chr3-20	chr3	195627701	195627827	+	12.3	0.726	64	64	4.6	13.78	3.95e-49	10.01	5.38e-41
chr4-26	chr4	170541561	170541687	+	12.3	0.614	66	64	7.4	8.61	2.95e-37	11.21	7.71e-44
chr4-29	chr4	177909522	177909648	+	12.3	0.85	64	64	2.8	22.97	1.56e-62	23.81	1.72e-63
chr5-25	chr5	37371173	37371299	+	12.3	0.643	61	64	3.7	17.22	6.18e-55	13.2	2.65e-47
chr5-22	chr5	140700342	140700468	+	12.3	0.791	64	64	3.7	17.22	6.18e-55	18.43	1.04e-56
chr6-120	chr6	2988883	2989009	+	12.3	0.669	63	64	6.5	9.84	1.43e-40	6.74	2.49e-31
chr6-112	chr6	11188557	11188683	+	12.3	0.787	64	64	4.6	13.78	3.95e-49	11.77	2.04e-44
chr6-113	chr6	11316335	11316461	+	12.3	0.699	64	64	11.1	5.74	1.43e-27	7.77	9.42e-35
chr6-115	chr6	35227931	35228057	+	12.3	0.601	64	66	6.5	10.15	1.41e-42	4.12	1.19e-19
chr8-33	chr8	134315402	134315528	+	12.3	0.648	68	64	9.3	6.89	7.59e-32	9.72	2.98e-40
chr8-36	chr8	146228284	146228410	+	12.3	0.775	66	65	5.6	11.66	1.59e-45	8.96	3.02e-38
chr10-45	chr10	32229954	32230080	+	12.3	0.752	61	64	7.4	8.61	2.95e-37	17.77	9.42e-56
chr10-46	chr10	70091667	70091793	+	12.3	0.785	61	64	0.9	68.9	2.78e-92	14.3	4.4e-50
chr11-30	chr11	61129796	61129922	+	12.3	0.845	65	64	4.6	13.78	3.95e-49	15.4	5.11e-52
chr11-25	chr11	63953319	63953445	+	12.3	0.683	67	65	4.6	13.99	2.82e-50	11.46	2.04e-44
chr12-35	chr12	94965413	94965539	+	12.3	0.694	66	65	7.4	8.75	3.37e-38	7.44	1.11e-33
chr12-30	chr12	113275459	113275585	+	12.3	0.82	67	64	6.5	9.84	1.43e-40	11.76	4.53e-45
chr14-242	chr14	19024568	19024694	+	12.3	0.933	35	64	8.4	7.66	2.23e-34	5.87	4.52e-28
chr14-40	chr14	23398556	23398682	+	12.3	0.795	60	64	8.4	7.66	2.23e-34	16.06	2.67e-52
chr14-39	chr14	50505637	50505763	+	12.3	0.655	61	64	2.8	22.97	1.56e-62	7.13	1.17e-32
chr14-30	chr14	50529423	50529549	+	12.3	0.617	63	64	9.3	6.89	7.59e-32	8.84	6.82e-38
chr15-2	chr15	89787127	89787253	+	12.3	0.813	65	64	2.8	22.97	1.56e-62	23.03	1.3e-62
chr17-51	chr17	965873	965999	+	12.3	0.798	64	64	14.9	4.31	3.7e-21	7.31	9.01e-33
chr18-26	chr18	24716207	24716333	+	12.3	0.78	64	64	4.6	13.78	3.95e-49	19.91	7.39e-58
chr18-27	chr18	74747912	74748038	+	12.3	0.725	64	64	2.8	22.97	1.56e-62	12.96	7.88e-47
chr19-92	chr19	45393669	45393795	+	12.3	0.681	63	64	6.5	9.84	1.43e-40	9.37	2.42e-39
chr21-16	chr21	10085395	10085521	+	12.3	0.567	62	64	13.9	4.59	1.48e-22	8.87	5.57e-38
chr1-80	chr1	11753247	11753373	+	12.1	0.653	64	63	3.7	16.95	1.07e-53	11.44	1.05e-43
chr1-95	chr1	64212013	64212139	+	12.1	0.683	62	63	6.5	9.69	1.41e-39	16.12	1.35e-51
chr1-90	chr1	156308222	156308348	+	12.1	0.72	63	64	1.9	34.45	2.09e-73	14.77	1.25e-48
chr1-68	chr1	244517167	244517293	+	12.1	0.768	68	63	5.6	11.3	2.13e-43	14.8	3.33e-50
chr1-93	chr1	249123118	249123244	+	12.1	0.779	63	63	0.9	67.82	1.92e-90	12.72	2.29e-46
chr2-86	chr2	88927057	88927183	+	12.1	0.618	62	63	2.8	22.61	3.58e-61	10.58	9.54e-42
chr3-23	chr3	15687553	15687679	+	12.1	0.591	60	63	6.5	9.69	1.41e-39	11.97	7.64e-45
chr3-19	chr3	48595729	48595855	+	12.1	0.67	64	63	0.9	67.82	1.92e-90	7.04	7.14e-32
chr4-36	chr4	129209201	129209327	+	12.1	0.619	60	63	1.9	33.91	7.19e-72	13.35	1.41e-47
chr5-26	chr5	90628244	90628370	+	12.1	0.617	61	64	3.7	17.22	6.18e-55	14.36	1.91e-49
chr5-23	chr5	170814585	170814711	+	12.1	0.686	64	64	4.6	13.78	3.95e-49	15.55	1.8e-51
chr6-121	chr6	4603659	4603785	+	12.1	0.745	63	64	5.6	11.48	1.85e-44	9.33	1.2e-38
chr6-122	chr6	30780855	30780981	+	12.1	0.716	63	63	11.1	5.65	8.24e-27	7.76	3.37e-34
chr6-137	chr6	32145506	32145632	+	12.1	0.723	61	63	10.2	6.17	8.53e-29	5.02	3.71e-24
chr6-138	chr6	35435997	35436123	+	12.1	0.755	61	63	11.1	5.65	8.24e-27	5.84	1.43e-27
chr6-103	chr6	36395617	36395743	+	12.1	0.696	67	64	6.5	9.84	1.43e-40	6.89	2.26e-31
chr6-129	chr6	37210678	37210804	+	12.1	0.605	62	63	10.2	6.17	8.53e-29	5.42	6.96e-26
chr6-117	chr6	40918925	40919051	+	12.1	0.572	64	64	6.5	9.84	1.43e-40	5.62	1.07e-26
chr6-125	chr6	47041062	47041188	+	12.1	0.653	63	63	2.8	22.61	3.58e-61	11.61	4.65e-44
chr6-131	chr6	55966201	55966327	+	12.1	0.627	62	63	2.8	22.61	3.58e-61	17.18	4.79e-54
chr8-37	chr8	126711026	126711152	+	12.1	0.74	63	63	6.5	9.69	1.41e-39	10.04	1.91e-40
chr11-48	chr11	12098218	12098344	+	12.1	0.656	60	63	1.9	33.91	7.19e-72	9.74	1.06e-39
chr11-45	chr11	64102584	64102710	+	12.1	0.788	61	63	5.6	11.3	2.13e-43	10.93	1.45e-42
chr11-50	chr11	65186299	65186425	+	12.1	0.661	60	63	4.6	13.56	5.45e-48	6.12	1.24e-28
chr11-40	chr11	65679171	65679297	+	12.1	0.702	63	63	9.3	6.78	5.24e-31	6.16	2.49e-28
chr12-41	chr12	82752150	82752276	+	12.1	0.754	63	63	4.6	13.56	5.45e-48	14.09	3.25e-48
chr12-38	chr12	96879006	96879132	+	12.1	0.773	65	64	3.7	17.22	6.18e-55	11.77	2.04e-44
chr12-36	chr12	124118260	124118386	+	12.1	0.796	66	64	9.3	6.89	7.59e-32	11.21	3.48e-43
chr14-38	chr14	37641234	37641360	+	12.1	0.716	61	63	7.4	8.48	2.55e-36	18.14	1.92e-55
chr14-28	chr14	53161576	53161702	+	12.1	0.672	65	63	2.8	22.61	3.58e-61	9.36	9.64e-39
chr14-36	chr14	55575086	55575212	+	12.1	0.689	62	63	13	4.84	2.2e-23	7.25	1.46e-32
chr14-32	chr14	59721267	59721393	+	12.1	0.765	63	63	3.7	16.95	1.07e-53	9.9	1.71e-39
chr17-52	chr17	27046467	27046593	+	12.1	0.661	64	63	3.7	16.95	1.07e-53	6.65	1.23e-29
chr17-59	chr17	38707536	38707662	+	12.1	0.661	60	63	5.6	11.3	2.13e-43	6.39	1.32e-29
chr20-44	chr20	42579078	42579204	+	12.1	0.687	62	63	8.4	7.54	1.71e-33	7.23	1.59e-32
chr20-45	chr20	49963408	49963534	+	12.1	0.619	62	63	11.1	5.65	8.24e-27	6.38	1.42e-29
chr21-17	chr21	44299655	44299781	+	12.1	0.793	62	63	9.3	6.78	5.24e-31	18.14	1.92e-55
chr1-101	chr1	44509981	44510107	+	11.9	0.683	61	62	3.7	16.69	1.81e-52	8.69	3.1e-35
chr1-86	chr1	46986339	46986465	+	11.9	0.796	63	62	5.6	11.12	2.41e-42	8.47	9.42e-36
chr1-96	chr1	68150764	68150890	+	11.9	0.704	62	62	2.8	22.25	8.09e-60	12.61	9.69e-45
chr1-79	chr1	226085025	226085151	+	11.9	0.672	65	63	5.6	11.3	2.13e-43	11.18	1.79e-42
chr1-98	chr1	226864946	226865072	+	11.9	0.664	62	62	2.8	22.25	8.09e-60	11.21	1.57e-42
chr2-91	chr2	47243814	47243940	+	11.9	0.713	60	62	1.9	33.37	2.44e-70	10.51	2.47e-40
chr3-26	chr3	61560683	61560809	+	11.9	0.714	59	62	3.7	16.69	1.81e-52	12.65	1.61e-45
chr4-34	chr4	25314344	25314470	+	11.9	0.71	61	62	2.8	22.25	8.09e-60	22.63	2.96e-60
chr5-29	chr5	43313653	43313779	+	11.9	0.676	59	62	4.6	13.35	7.4e-47	15.5	1.33e-50
chr6-109	chr6	31082541	31082667	+	11.9	0.639	65	63	6.5	9.69	1.41e-39	6.31	1.81e-28
chr6-162	chr6	32146083	32146209	+	11.9	0.632	58	62	4.6	13.35	7.4e-47	4.91	2.53e-23
chr6-184	chr6	56558081	56558207	+	11.9	0.755	56	62	6.5	9.53	1.37e-38	12.01	1.54e-43
chr7-26	chr7	130003420	130003546	+	11.9	0.774	61	63	4.6	13.56	5.45e-48	22.42	5.15e-60
chr9-22	chr9	97545486	97545612	+	11.9	0.673	64	63	9.3	6.78	5.24e-31	15.45	1.6e-50
chr10-55	chr10	71488056	71488182	+	11.9	0.661	58	62	6.5	9.53	1.37e-38	12.08	2.24e-44
chr10-44	chr10	75504051	75504177	+	11.9	0.747	62	62	0.9	66.74	1.3e-88	12.68	1.38e-45
chr11-41	chr11	66185650	66185776	+	11.9	0.705	63	62	4.6	13.35	7.4e-47	10.69	2.31e-41
chr11-35	chr11	74747183	74747309	+	11.9	0.726	64	62	1.9	33.37	2.44e-70	12.3	8.17e-45
chr11-47	chr11	124952980	124953106	+	11.9	0.657	61	62	6.5	9.53	1.37e-38	7.8	8.5e-34
chr12-48	chr12	6389391	6389517	+	11.9	0.735	60	63	4.6	13.56	5.45e-48	13.21	1.38e-46
chr12-47	chr12	95611491	95611617	+	11.9	0.713	61	62	4.6	13.35	7.4e-47	12.02	2.98e-44
chr12-44	chr12	118454403	118454529	+	11.9	0.709	63	62	7.4	8.34	2.17e-35	14.73	1.5e-48
chr14-31	chr14	52805156	52805282	+	11.9	0.743	63	62	10.2	6.07	5.28e-28	7.88	5.01e-34
chr14-35	chr14	55544489	55544615	+	11.9	0.585	62	62	4.6	13.35	7.4e-47	6.23	1.36e-28
chr14-33	chr14	75491918	75492044	+	11.9	0.724	63	62	3.7	16.69	1.81e-52	12.3	8.17e-45
chr14-29	chr14	93214967	93215093	+	11.9	0.719	64	62	5.6	11.12	2.41e-42	13.35	7.31e-47
chr16-39	chr16	89430085	89430211	+	11.9	0.816	58	62	0.9	66.74	1.3e-88	18.4	5.98e-55
chr17-54	chr17	7379942	7380068	+	11.9	0.655	62	62	5.6	11.12	2.41e-42	10.17	3.77e-40
chr17-61	chr17	17315790	17315916	+	11.9	0.826	59	62	1.9	33.37	2.44e-70	11.48	4.13e-43
chr17-56	chr17	40610826	40610952	+	11.9	0.718	61	62	2.8	22.25	8.09e-60	14.43	8.3e-49
chr17-55	chr17	73687553	73687679	+	11.9	0.701	62	62	4.6	13.35	7.4e-47	9.84	9.64e-39
chr18-28	chr18	20679778	20679904	+	11.9	0.624	63	62	1.9	33.37	2.44e-70	9.64	7.44e-39
chr19-106	chr19	11279472	11279598	+	11.9	0.639	59	62	1.9	33.37	2.44e-70	9.48	7.19e-38
chr19-88	chr19	17190962	17191088	+	11.9	0.661	63	64	11.1	5.74	1.43e-27	5.89	2.57e-27
chr19-113	chr19	17422837	17422963	+	11.9	0.764	58	62	5.6	11.12	2.41e-42	5.82	4.51e-27
chr19-100	chr19	17901331	17901457	+	11.9	0.739	61	62	8.4	7.42	1.29e-32	7.28	3.47e-32
chr19-85	chr19	56110947	56111073	+	11.9	0.672	64	62	2.8	22.25	8.09e-60	8.2	1.86e-34
chr20-33	chr20	56703008	56703134	+	11.9	0.64	67	63	6.5	9.69	1.41e-39	8.28	3.24e-35
chr20-68	chr20	60494956	60495082	+	11.9	0.598	56	62	9.3	6.67	3.56e-30	7.98	2.45e-34
chr21-19	chr21	37985527	37985653	+	11.9	0.791	60	62	3.7	16.69	1.81e-52	16.34	6.17e-52
chr1-107	chr1	22110105	22110231	+	11.7	0.795	60	61	8.4	7.3	9.6e-32	17.76	3.28e-53
chr1-100	chr1	27110814	27110940	+	11.7	0.776	61	61	12.1	5.05	1.38e-23	11.16	9.18e-42
chr1-108	chr1	36023275	36023401	+	11.7	0.774	60	62	5.6	11.12	2.41e-42	14.41	5.09e-48
chr1-110	chr1	96828168	96828294	+	11.7	0.643	60	61	2.8	21.89	1.8e-58	14.46	4.28e-48
chr1-102	chr1	144932339	144932465	+	11.7	0.71	61	62	11.1	5.56	4.67e-26	7.43	3.6e-32
chr1-97	chr1	156896169	156896295	+	11.7	0.728	62	62	1.9	33.37	2.44e-70	9.6	3.71e-38
chr1-104	chr1	201987934	201988060	+	11.7	0.628	61	62	0.9	66.74	1.3e-88	9.41	1.11e-37
chr1-92	chr1	221915387	221915513	+	11.7	0.658	63	61	3.7	16.42	3.02e-51	8.81	3.88e-36
chr2-85	chr2	238037108	238037234	+	11.7	0.828	63	61	0.9	65.67	8.67e-87	8.39	5.47e-35
chr6-150	chr6	2876630	2876756	+	11.7	0.603	59	61	6.5	9.38	1.31e-37	9.24	2.92e-37
chr6-141	chr6	4942521	4942647	+	11.7	0.631	60	61	6.5	9.38	1.31e-37	10.82	2.2e-40
chr6-139	chr6	41904096	41904222	+	11.7	0.675	61	63	14.9	4.24	1.6e-20	6.14	2.09e-27
chr6-118	chr6	41944696	41944822	+	11.7	0.652	64	62	11.1	5.56	4.67e-26	7.03	7.03e-31
chr6-130	chr6	42420954	42421080	+	11.7	0.844	62	61	7.4	8.21	1.81e-34	4.8	1.6e-22
chr8-40	chr8	144363878	144364004	+	11.7	0.743	62	62	4.6	13.35	7.4e-47	10.41	1.81e-39
chr9-25	chr9	112078552	112078678	+	11.7	0.638	62	61	4.6	13.13	9.89e-46	8.86	2.86e-36
chr10-52	chr10	79110561	79110687	+	11.7	0.793	59	61	5.6	10.94	2.69e-41	17.37	1.18e-52
chr11-43	chr11	64008787	64008913	+	11.7	0.675	62	61	1.9	32.83	8.14e-69	6.76	5.08e-30
chr11-51	chr11	127909715	127909841	+	11.7	0.8	60	62	2.8	22.25	8.09e-60	17	4.11e-52
chr12-45	chr12	96821208	96821334	+	11.7	0.657	62	61	2.8	21.89	1.8e-58	9.78	5.41e-38
chr12-43	chr12	113478624	113478750	+	11.7	0.641	63	61	11.1	5.47	2.61e-25	12.92	2.48e-45
chr12-53	chr12	113622722	113622848	+	11.7	0.742	58	61	9.3	6.57	2.39e-29	11.24	6.19e-42
chr12-51	chr12	120973000	120973126	+	11.7	0.684	59	62	6.5	9.53	1.37e-38	10.31	7.36e-40
chr12-50	chr12	121837826	121837952	+	11.7	0.748	60	62	10.2	6.07	5.28e-28	13.83	5.42e-47
chr14-37	chr14	24911953	24912079	+	11.7	0.643	61	62	4.6	13.35	7.4e-47	11.89	2.71e-43
chr14-46	chr14	99882129	99882255	+	11.7	0.823	59	62	7.4	8.34	2.17e-35	22.82	1.24e-57
chr16-36	chr16	57798265	57798391	+	11.7	0.804	58	61	2.8	21.89	1.8e-58	12.68	7.18e-45
chr17-57	chr17	4843248	4843374	+	11.7	0.699	60	61	6.5	9.38	1.31e-37	10.93	2.94e-41
chr19-102	chr19	11205786	11205912	+	11.7	0.583	60	61	6.5	9.38	1.31e-37	6.36	1.28e-28
chr19-97	chr19	11254176	11254302	+	11.7	0.638	61	62	4.6	13.35	7.4e-47	7.28	1.05e-31
chr19-75	chr19	12662299	12662425	+	11.7	0.661	67	62	3.7	16.69	1.81e-52	8.35	7.27e-35
chr19-103	chr19	16439254	16439380	+	11.7	0.697	60	61	3.7	16.42	3.02e-51	5.32	1.04e-24
chr19-91	chr19	39202585	39202711	+	11.7	0.71	63	61	6.5	9.38	1.31e-37	11.57	1.24e-42
chr19-126	chr19	46135878	46136004	+	11.7	0.78	56	61	6.5	9.38	1.31e-37	15.01	5.13e-49
chr20-40	chr20	46020880	46021006	+	11.7	0.675	64	62	8.4	7.42	1.29e-32	8.56	1.89e-35
chr20-51	chr20	47835738	47835864	+	11.7	0.752	60	61	3.7	16.42	3.02e-51	10.78	6.3e-41
chr20-41	chr20	49126724	49126850	+	11.7	0.685	64	62	4.6	13.35	7.4e-47	8.33	7.99e-35
chr20-48	chr20	52684140	52684266	+	11.7	0.692	61	61	2.8	21.89	1.8e-58	12.02	6.93e-43
chr1-109	chr1	55487745	55487871	+	11.5	0.631	60	60	4.6	12.92	1.3e-44	13.14	5.07e-45
chr1-81	chr1	155232058	155232184	+	11.5	0.689	64	61	6.5	9.38	1.31e-37	10.43	1.6e-39
chr1-117	chr1	211765627	211765753	+	11.5	0.765	59	60	9.3	6.46	1.57e-28	12.81	1.06e-43
chr1-106	chr1	235061814	235061940	+	11.5	0.681	61	61	2.8	21.89	1.8e-58	10.32	2.94e-39
chr5-38	chr5	83699697	83699823	+	11.5	0.798	56	60	4.6	12.92	1.3e-44	26.36	3.52e-61
chr5-27	chr5	131723467	131723593	+	11.5	0.76	60	60	7.4	8.07	1.49e-33	10.8	2.5e-40
chr6-144	chr6	26458016	26458142	+	11.5	0.791	60	60	6.5	9.23	1.23e-36	9.54	2.07e-37
chr6-161	chr6	30715261	30715387	+	11.5	0.74	58	60	7.4	8.07	1.49e-33	4.2	1.96e-19
chr6-152	chr6	33041426	33041552	+	11.5	0.645	59	60	5.6	10.77	2.94e-40	8.77	6.78e-35
chr6-128	chr6	34212275	34212401	+	11.5	0.649	62	60	10.2	5.87	1.92e-26	6.77	1.42e-29
chr6-166	chr6	41769284	41769410	+	11.5	0.633	58	60	11.1	5.38	1.43e-24	7.07	1.42e-29
chr7-25	chr7	2197337	2197463	+	11.5	0.771	61	60	1.9	32.3	2.67e-67	18.29	4.29e-53
chr7-29	chr7	102516369	102516495	+	11.5	0.826	55	60	5.6	10.77	2.94e-40	18.22	5.36e-53
chr8-41	chr8	109455763	109455889	+	11.5	0.737	61	61	9.3	6.57	2.39e-29	13.1	3.08e-44
chr8-38	chr8	117436204	117436330	+	11.5	0.814	62	60	7.4	8.07	1.49e-33	12.78	2.37e-44
chr8-39	chr8	133715921	133716047	+	11.5	0.787	62	60	3.7	16.15	4.97e-50	10.12	8.55e-39
chr9-39	chr9	74398570	74398696	+	11.5	0.661	55	60	3.7	16.15	4.97e-50	15.44	3.73e-48
chr9-30	chr9	101834332	101834458	+	11.5	0.745	59	60	7.4	8.07	1.49e-33	10.46	1.42e-39
chr9-27	chr9	112578764	112578890	+	11.5	0.623	61	60	4.6	12.92	1.3e-44	9.22	1.3e-36
chr10-48	chr10	123811287	123811413	+	11.5	0.678	60	60	1.9	32.3	2.67e-67	12.67	1.93e-43
chr11-46	chr11	64667831	64667957	+	11.5	0.75	61	60	4.6	12.92	1.3e-44	9.7	8.49e-38
chr11-36	chr11	129873550	129873676	+	11.5	0.779	64	60	7.4	8.07	1.49e-33	13.44	1.43e-45
chr12-55	chr12	94071128	94071254	+	11.5	0.75	57	60	7.4	8.07	1.49e-33	11.73	1.26e-41
chr13-2	chr13	45992609	45992735	+	11.5	0.806	56	60	1.9	32.3	2.67e-67	22.75	1.66e-58
chr14-41	chr14	52294755	52294881	+	11.5	0.762	60	60	5.6	10.77	2.94e-40	6.36	9.4e-28
chr14-43	chr14	53196536	53196662	+	11.5	0.742	59	60	5.6	10.77	2.94e-40	12.61	5.03e-44
chr14-42	chr14	77279173	77279299	+	11.5	0.821	60	60	7.4	8.07	1.49e-33	11.19	3.63e-41
chr14-34	chr14	90422878	90423004	+	11.5	0.735	63	60	7.4	8.07	1.49e-33	12.64	4.33e-44
chr16-26	chr16	31063606	31063732	+	11.5	0.706	62	60	2.8	21.53	3.95e-57	14.67	1.1e-47
chr16-31	chr16	69760300	69760426	+	11.5	0.701	60	60	1.9	32.3	2.67e-67	12.47	9.11e-44
chr17-58	chr17	4870585	4870711	+	11.5	0.632	60	60	5.6	10.77	2.94e-40	9.25	1.05e-36
chr17-60	chr17	46970037	46970163	+	11.5	0.578	60	61	5.6	10.94	2.69e-41	12.34	1.64e-43
chr19-111	chr19	11546332	11546458	+	11.5	0.691	58	60	9.3	6.46	1.57e-28	9.89	1.22e-37
chr19-83	chr19	13945099	13945225	+	11.5	0.638	64	60	6.5	9.23	1.23e-36	6.09	2.13e-26
chr19-89	chr19	17530584	17530710	+	11.5	0.75	63	62	8.4	7.42	1.29e-32	9.24	1.67e-35
chr20-55	chr20	31240834	31240960	+	11.5	0.787	59	60	6.5	9.23	1.23e-36	14.4	3.12e-47
chr21-26	chr21	40297911	40298037	+	11.5	0.8	56	60	3.7	16.15	4.97e-50	25.21	4.52e-61
chr1-126	chr1	78444789	78444915	+	11.3	0.828	57	59	2.8	21.17	8.5e-56	20.39	7.13e-55
chr1-127	chr1	85744665	85744791	+	11.3	0.636	57	59	6.5	9.07	1.14e-35	12.23	1.32e-42
chr1-120	chr1	149658490	149658616	+	11.3	0.868	58	60	6.5	9.23	1.23e-36	31.63	1.08e-65
chr1-103	chr1	150601678	150601804	+	11.3	0.779	61	59	3.7	15.88	8.03e-49	10.92	5.97e-40
chr1-118	chr1	224811661	224811787	+	11.3	0.692	59	60	3.7	16.15	4.97e-50	8.84	4.53e-35
chr1-99	chr1	230240440	230240566	+	11.3	0.669	62	59	3.7	15.88	8.03e-49	9.16	2.55e-35
chr2-96	chr2	66656288	66656414	+	11.3	0.819	58	59	3.7	15.88	8.03e-49	16.62	6.43e-50
chr2-94	chr2	101482619	101482745	+	11.3	0.709	59	59	2.8	21.17	8.5e-56	9.48	1.15e-36
chr2-95	chr2	228683049	228683175	+	11.3	0.672	59	59	7.4	7.94	1.21e-32	14.88	1.71e-46
chr2-92	chr2	241501241	241501367	+	11.3	0.81	60	59	2.8	21.17	8.5e-56	14.65	6.74e-47
chr3-27	chr3	124531770	124531896	+	11.3	0.735	59	59	5.6	10.59	3.17e-39	12.99	4.91e-44
chr3-28	chr3	194247922	194248048	+	11.3	0.827	59	60	11.1	5.38	1.43e-24	16.92	2.33e-50
chr4-31	chr4	7024009	7024135	+	11.3	0.655	62	60	8.4	7.18	7.02e-31	10.28	1.49e-38
chr4-33	chr4	152682239	152682365	+	11.3	0.717	62	61	4.6	13.13	9.89e-46	17.71	1.87e-51
chr4-42	chr4	191032434	191032560	+	11.3	0.625	57	59	4.6	12.7	1.68e-43	9.49	1.64e-35
chr6-142	chr6	7505665	7505791	+	11.3	0.733	60	59	7.4	7.94	1.21e-32	11.33	8.44e-41
chr6-135	chr6	14271209	14271335	+	11.3	0.634	61	59	11.1	5.29	7.73e-24	7.13	2.93e-30
chr6-179	chr6	33288241	33288367	+	11.3	0.652	56	59	5.6	10.59	3.17e-39	5.86	5.59e-26
chr6-153	chr6	35227051	35227177	+	11.3	0.602	59	59	12.1	4.89	3.5e-22	4.11	1.05e-18
chr6-192	chr6	37096268	37096394	+	11.3	0.704	55	60	7.4	8.07	1.49e-33	5.22	3.38e-23
chr6-147	chr6	37178105	37178231	+	11.3	0.686	60	59	4.6	12.7	1.68e-43	4.88	3.54e-22
chr8-42	chr8	81960274	81960400	+	11.3	0.743	60	61	1.9	32.83	8.14e-69	11.58	2.51e-41
chr8-57	chr8	118532810	118532936	+	11.3	0.828	56	59	5.6	10.59	3.17e-39	11.94	4.76e-42
chr8-44	chr8	146017892	146018018	+	11.3	0.798	60	60	9.3	6.46	1.57e-28	8.23	1.81e-33
chr9-34	chr9	72037237	72037363	+	11.3	0.803	58	59	8.4	7.06	5.05e-30	18.35	2.6e-52
chr9-41	chr9	136890261	136890387	+	11.3	0.667	55	59	5.6	10.59	3.17e-39	11.11	4.92e-39
chr10-51	chr10	72288700	72288826	+	11.3	0.767	59	59	5.6	10.59	3.17e-39	12.07	2.7e-42
chr10-47	chr10	75910866	75910992	+	11.3	0.809	60	59	1.9	31.76	8.64e-66	10.42	7.22e-39
chr11-52	chr11	32140091	32140217	+	11.3	0.713	59	59	8.4	7.06	5.05e-30	13.33	1.2e-44
chr11-58	chr11	46144679	46144805	+	11.3	0.868	57	59	3.7	15.88	8.03e-49	7.81	2.75e-32
chr12-40	chr12	48135283	48135409	+	11.3	0.8	64	60	2.8	21.53	3.95e-57	13.33	1.2e-44
chr12-49	chr12	104249246	104249372	+	11.3	0.735	60	59	6.5	9.07	1.14e-35	5.01	1.04e-22
chr14-52	chr14	55538884	55539010	+	11.3	0.724	55	59	5.6	10.59	3.17e-39	8.41	2.1e-33
chr14-44	chr14	58711558	58711684	+	11.3	0.615	59	59	0.9	63.51	3.68e-83	12.71	1.66e-43
chr17-68	chr17	47865928	47866054	+	11.3	0.733	57	59	1.9	31.76	8.64e-66	13.14	2.63e-44
chr18-29	chr18	43382856	43382982	+	11.3	0.742	63	59	4.6	12.7	1.68e-43	13.61	3.89e-45
chr19-95	chr19	680956	681082	+	11.3	0.789	61	59	0.9	63.51	3.68e-83	17.18	1.02e-50
chr19-96	chr19	7197436	7197562	+	11.3	0.703	61	59	8.4	7.06	5.05e-30	10.19	4.3e-37
chr19-117	chr19	11750474	11750600	+	11.3	0.77	57	59	5.6	10.59	3.17e-39	12.04	3.11e-42
chr19-98	chr19	12405663	12405789	+	11.3	0.713	61	61	13.9	4.38	1.39e-20	11.73	1.26e-41
chr19-107	chr19	18390419	18390545	+	11.3	0.708	59	59	8.4	7.06	5.05e-30	7.3	8.79e-31
chr19-94	chr19	48018521	48018647	+	11.3	0.598	62	59	5.6	10.59	3.17e-39	9.1	9.71e-36
chr19-101	chr19	49468386	49468512	+	11.3	0.68	61	59	2.8	21.17	8.5e-56	8.99	1.81e-35
chr19-116	chr19	49946735	49946861	+	11.3	0.729	58	59	4.6	12.7	1.68e-43	11.11	2.42e-40
chr20-46	chr20	10521473	10521599	+	11.3	0.723	61	60	4.6	12.92	1.3e-44	16.04	4.63e-49
chr20-60	chr20	37081656	37081782	+	11.3	0.854	58	59	4.6	12.7	1.68e-43	8.65	1.76e-33
chr20-56	chr20	42379892	42380018	+	11.3	0.645	59	59	6.5	9.07	1.14e-35	7.76	3.9e-32
chr20-47	chr20	44002597	44002723	+	11.3	0.737	61	60	7.4	8.07	1.49e-33	9.08	1.08e-35
chr20-53	chr20	52543228	52543354	+	11.3	0.718	60	59	4.6	12.7	1.68e-43	10.71	7.41e-39
chr20-57	chr20	60813314	60813440	+	11.3	0.78	59	59	13.9	4.23	2.64e-19	8.54	2.7e-34
chr1-125	chr1	70671339	70671465	+	11.1	0.793	57	58	3.7	15.61	1.28e-47	17.01	1.16e-49
chr1-116	chr1	203528756	203528882	+	11.1	0.705	59	59	9.3	6.35	1.02e-27	9.37	3.15e-35
chr1-84	chr1	204407829	204407955	+	11.1	0.67	64	59	4.6	12.7	1.68e-43	10.2	9.56e-38
chr2-88	chr2	27851732	27851858	+	11.1	0.807	61	58	1.9	31.22	2.75e-64	18.4	1.58e-51
chr3-25	chr3	11612375	11612501	+	11.1	0.752	59	59	6.5	9.07	1.14e-35	10.51	1.99e-38
chr4-37	chr4	174173627	174173753	+	11.1	0.725	60	58	2.8	20.81	1.8e-54	19.19	1.6e-52
chr5-33	chr5	912568	912694	+	11.1	0.626	57	58	6.5	8.92	1.03e-34	7.32	2.44e-30
chr5-34	chr5	55507437	55507563	+	11.1	0.817	57	58	6.5	8.92	1.03e-34	19.27	9.59e-52
chr6-169	chr6	30035260	30035386	+	11.1	0.613	57	58	9.3	6.24	6.48e-27	6.35	2.82e-27
chr6-163	chr6	36515226	36515352	+	11.1	0.71	58	59	8.4	7.06	5.05e-30	6.46	1.22e-27
chr6-157	chr6	43021007	43021133	+	11.1	0.588	59	59	13	4.54	1.12e-20	5.79	2.57e-25
chr6-173	chr6	43595018	43595144	+	11.1	0.737	57	59	7.4	7.94	1.21e-32	7.69	1.97e-31
chr6-140	chr6	56224197	56224323	+	11.1	0.697	61	59	6.5	9.07	1.14e-35	11.05	1.42e-39
chr8-45	chr8	119023669	119023795	+	11.1	0.703	59	59	7.4	7.94	1.21e-32	8.07	1.8e-32
chr8-43	chr8	121377494	121377620	+	11.1	0.73	60	58	4.6	12.49	2.14e-42	11.56	1.3e-40
chr8-47	chr8	130838563	130838689	+	11.1	0.815	59	58	0.9	62.44	2.34e-81	9.93	3.89e-37
chr9-31	chr9	116412794	116412920	+	11.1	0.773	59	59	4.6	12.7	1.68e-43	9.04	5.29e-35
chr9-28	chr9	124855636	124855762	+	11.1	0.774	61	58	4.6	12.49	2.14e-42	12.59	1.35e-42
chr9-29	chr9	128284170	128284296	+	11.1	0.796	61	59	1.9	31.76	8.64e-66	13.26	8.53e-44
chr10-58	chr10	123900892	123901018	+	11.1	0.68	57	59	2.8	21.17	8.5e-56	7.92	4.43e-32
chr11-75	chr11	8790309	8790435	+	11.1	0.667	54	58	5.6	10.41	3.37e-38	9.04	5.29e-35
chr11-53	chr11	36475395	36475521	+	11.1	0.713	59	58	9.3	6.24	6.48e-27	8.4	2.31e-33
chr11-55	chr11	73046629	73046755	+	11.1	0.774	58	58	2.8	20.81	1.8e-54	13.26	8.53e-44
chr14-51	chr14	23504040	23504166	+	11.1	0.812	55	58	10.2	5.68	6.56e-25	12.74	7.43e-43
chr14-47	chr14	100150289	100150415	+	11.1	0.706	58	58	5.6	10.41	3.37e-38	9.76	9.68e-37
chr17-67	chr17	16380719	16380845	+	11.1	0.802	57	59	5.6	10.59	3.17e-39	12.35	3.81e-42
chr17-62	chr17	57232597	57232723	+	11.1	0.669	59	58	6.5	8.92	1.03e-34	16.22	1.59e-48
chr17-76	chr17	73043039	73043165	+	11.1	0.769	56	59	7.4	7.94	1.21e-32	15.39	1.7e-46
chr19-99	chr19	12884441	12884567	+	11.1	0.664	61	58	10.2	5.68	6.56e-25	5.57	1.67e-24
chr19-120	chr19	44172492	44172618	+	11.1	0.66	57	58	4.6	12.49	2.14e-42	6.89	4.87e-29
chr20-65	chr20	36618221	36618347	+	11.1	0.783	56	58	5.6	10.41	3.37e-38	6.47	1.14e-27
chr20-52	chr20	49977153	49977279	+	11.1	0.77	60	58	6.5	8.92	1.03e-34	8.47	5.15e-33
chrX-51	chrX	58546911	58547037	+	11.1	0.87	37	58	13.9	4.16	1.12e-18	13.92	6.38e-45
chr1-112	chr1	11865890	11866016	+	10.9	0.609	59	57	3.7	15.34	1.99e-46	6.59	1.26e-27
chr1-122	chr1	27110513	27110639	+	10.9	0.622	57	58	2.8	20.81	1.8e-54	10.68	3.78e-38
chr1-123	chr1	42328775	42328901	+	10.9	0.807	57	57	4.6	12.27	2.68e-41	10.45	1.15e-37
chr1-133	chr1	46598504	46598630	+	10.9	0.617	56	58	3.7	15.61	1.28e-47	9.36	1.26e-34
chr1-124	chr1	53168664	53168790	+	10.9	0.789	57	57	3.7	15.34	1.99e-46	13.51	1.7e-43
chr1-153	chr1	68578804	68578930	+	10.9	0.79	54	58	3.7	15.61	1.28e-47	17.31	3.09e-49
chr1-136	chr1	151030305	151030431	+	10.9	0.783	56	57	3.7	15.34	1.99e-46	12.92	1.8e-42
chr1-137	chr1	155107716	155107842	+	10.9	0.687	56	57	0.9	61.36	1.46e-79	8.41	7.56e-33
chr1-111	chr1	201505732	201505858	+	10.9	0.724	60	57	1.9	30.68	8.58e-63	9.17	9.15e-35
chr2-101	chr2	11694312	11694438	+	10.9	0.651	57	57	4.6	12.27	2.68e-41	14.02	2.36e-44
chr2-103	chr2	68873591	68873717	+	10.9	0.756	57	58	6.5	8.92	1.03e-34	11.79	2.23e-40
chr2-98	chr2	98280558	98280684	+	10.9	0.802	58	57	7.4	7.67	7.51e-31	12.73	3.86e-42
chr2-99	chr2	114644081	114644207	+	10.9	0.641	58	57	7.4	7.67	7.51e-31	15.02	6.12e-46
chr3-24	chr3	9772604	9772730	+	10.9	0.697	59	59	4.6	12.7	1.68e-43	9.55	1.18e-35
chr3-33	chr3	48481522	48481648	+	10.9	0.768	56	58	2.8	20.81	1.8e-54	7.86	2.44e-30
chr3-38	chr3	50384684	50384810	+	10.9	0.878	54	57	2.8	20.45	3.75e-53	12.31	2.29e-41
chr4-43	chr4	7830221	7830347	+	10.9	0.779	56	57	2.8	20.45	3.75e-53	18.29	1.13e-49
chr4-35	chr4	127771621	127771747	+	10.9	0.81	60	57	9.3	6.14	4.06e-26	24.21	3.81e-57
chr5-28	chr5	32193871	32193997	+	10.9	0.694	59	57	7.4	7.67	7.51e-31	14.53	3.61e-45
chr5-35	chr5	71683942	71684068	+	10.9	0.67	57	57	6.5	8.77	9.24e-34	13.15	3.69e-42
chr5-36	chr5	73622943	73623069	+	10.9	0.724	56	57	3.7	15.34	1.99e-46	11.94	1.11e-40
chr5-32	chr5	172879301	172879427	+	10.9	0.623	58	58	1.9	31.22	2.75e-64	8.1	4.91e-32
chr6-151	chr6	5082919	5083045	+	10.9	0.562	59	57	8.4	6.82	2.49e-28	9.35	3.51e-35
chr6-143	chr6	14821173	14821299	+	10.9	0.694	60	57	6.5	8.77	9.24e-34	8.06	6.46e-32
chr6-136	chr6	16766531	16766657	+	10.9	0.639	61	57	8.4	6.82	2.49e-28	6.4	5.22e-27
chr6-189	chr6	18516110	18516236	+	10.9	0.753	55	57	6.5	8.77	9.24e-34	13.39	2.75e-43
chr6-176	chr6	29933933	29934059	+	10.9	0.795	56	58	3.7	15.61	1.28e-47	11.85	1.69e-40
chr6-170	chr6	37598188	37598314	+	10.9	0.75	57	57	7.4	7.67	7.51e-31	4.62	2.16e-20
chr6-172	chr6	43132300	43132426	+	10.9	0.597	57	57	13	4.38	2.28e-19	5.08	3.02e-22
chr8-56	chr8	101734331	101734457	+	10.9	0.663	56	57	11.1	5.11	2.15e-22	9.63	7.58e-36
chr8-58	chr8	124552548	124552674	+	10.9	0.809	55	57	10.2	5.58	3.74e-24	6.96	9.31e-29
chr8-50	chr8	128961998	128962124	+	10.9	0.629	58	58	6.5	8.92	1.03e-34	8.74	3.86e-33
chr8-55	chr8	142140108	142140234	+	10.9	0.793	57	57	4.6	12.27	2.68e-41	7.02	5.85e-29
chr9-32	chr9	117349913	117350039	+	10.9	0.798	59	58	10.2	5.68	6.56e-25	12.11	5.44e-41
chr10-73	chr10	72091602	72091728	+	10.9	0.673	54	57	5.6	10.23	3.51e-37	9.08	1.54e-34
chr10-57	chr10	102134025	102134151	+	10.9	0.667	57	57	3.7	15.34	1.99e-46	8.57	2.88e-33
chr11-62	chr11	33655088	33655214	+	10.9	0.677	56	57	1.9	30.68	8.58e-63	14.11	1.69e-44
chr11-56	chr11	75059098	75059224	+	10.9	0.701	58	57	3.7	15.34	1.99e-46	7.26	1.11e-29
chr11-60	chr11	102601837	102601963	+	10.9	0.719	57	57	2.8	20.45	3.75e-53	15.49	1.17e-46
chr12-67	chr12	89769806	89769932	+	10.9	0.686	53	57	4.6	12.27	2.68e-41	7.96	3.99e-31
chr12-59	chr12	105352415	105352541	+	10.9	0.745	56	57	10.2	5.58	3.74e-24	9.52	2.1e-34
chr14-54	chr14	61992201	61992327	+	10.9	0.653	54	57	3.7	15.34	1.99e-46	10.48	1.02e-37
chr14-45	chr14	69014448	69014574	+	10.9	0.692	59	57	2.8	20.45	3.75e-53	6.53	2.09e-27
chr16-43	chr16	30661895	30662021	+	10.9	0.681	56	57	1.9	30.68	8.58e-63	14.39	6.07e-45
chr17-87	chr17	966764	966890	+	10.9	0.983	54	58	9.3	6.24	6.48e-27	6.77	3.63e-28
chr17-66	chr17	42611032	42611158	+	10.9	0.711	58	57	3.7	15.34	1.99e-46	9.01	8.41e-34
chr18-33	chr18	30241952	30242078	+	10.9	0.845	54	57	0.9	61.36	1.46e-79	20.9	1.16e-53
chr19-127	chr19	1812776	1812902	+	10.9	0.66	55	58	2.8	20.81	1.8e-54	12.81	2.85e-42
chr19-130	chr19	9879366	9879492	+	10.9	0.765	55	57	2.8	20.45	3.75e-53	12.92	1.8e-42
chr19-108	chr19	19174634	19174760	+	10.9	0.712	59	57	8.4	6.82	2.49e-28	9.41	2.54e-35
chr19-134	chr19	36422620	36422746	+	10.9	0.681	55	57	2.8	20.45	3.75e-53	12.81	2.85e-42
chr19-115	chr19	37328783	37328909	+	10.9	0.69	58	59	7.4	7.94	1.21e-32	13.85	4.61e-44
chr19-105	chr19	45195466	45195592	+	10.9	0.711	60	57	2.8	20.45	3.75e-53	8.31	1.34e-32
chr20-63	chr20	33113904	33114030	+	10.9	0.615	57	57	6.5	8.77	9.24e-34	7.52	1.96e-30
chr20-58	chr20	34330165	34330291	+	10.9	0.72	58	57	11.1	5.11	2.15e-22	7.8	3.22e-31
chr20-49	chr20	42472117	42472243	+	10.9	0.653	60	57	4.6	12.27	2.68e-41	6.84	2.15e-28
chr20-61	chr20	44048211	44048337	+	10.9	0.692	58	57	5.6	10.23	3.51e-37	10.31	2.37e-37
chr20-67	chr20	52445989	52446115	+	10.9	0.822	56	58	3.7	15.61	1.28e-47	12.01	8.35e-41
chr1-131	chr1	23016075	23016201	+	10.8	0.731	56	56	4.6	12.06	3.29e-40	12.3	1.19e-40
chr1-156	chr1	28764582	28764708	+	10.8	0.742	53	56	5.6	10.05	3.6e-36	17.92	3.41e-49
chr1-113	chr1	60225314	60225440	+	10.8	0.875	59	56	8.4	6.7	1.7e-27	17.63	8.09e-49
chr1-135	chr1	144018789	144018915	+	10.8	0.619	56	56	13	4.31	1.01e-18	10.28	4.79e-36
chr1-145	chr1	165868157	165868283	+	10.8	0.682	55	57	3.7	15.34	1.99e-46	9.97	2.21e-35
chr1-121	chr1	205267730	205267856	+	10.8	0.779	58	56	4.6	12.06	3.29e-40	9.92	6.96e-36
chr1-119	chr1	235147494	235147620	+	10.8	0.622	59	56	0.5	120.57	1.98e-94	9.04	2.73e-33
chr2-106	chr2	37593040	37593166	+	10.8	0.663	56	57	1.9	30.68	8.58e-63	9.65	1.08e-34
chr3-30	chr3	43908267	43908393	+	10.8	0.614	57	56	2.8	20.09	7.68e-52	7.68	2.31e-30
chr3-31	chr3	158846494	158846620	+	10.8	0.738	57	56	0.5	120.57	1.98e-94	19.26	7.28e-51
chr3-32	chr3	160116976	160117102	+	10.8	0.759	57	56	1.9	30.14	2.63e-61	27.55	3.39e-59
chr3-43	chr3	194494007	194494133	+	10.8	0.795	54	56	8.4	6.7	1.7e-27	11.4	5.92e-39
chr4-38	chr4	2221866	2221992	+	10.8	0.711	57	56	5.6	10.05	3.6e-36	13.4	7.42e-42
chr4-39	chr4	76649756	76649882	+	10.8	0.683	57	56	4.6	12.06	3.29e-40	10.57	2.8e-37
chr4-44	chr4	84377005	84377131	+	10.8	0.732	56	56	4.6	12.06	3.29e-40	17.55	1e-48
chr4-41	chr4	113558580	113558706	+	10.8	0.744	57	56	1.9	30.14	2.63e-61	12.55	4.24e-41
chr4-45	chr4	153656552	153656678	+	10.8	0.841	56	56	5.6	10.05	3.6e-36	12.66	2.71e-41
chr4-52	chr4	182160796	182160922	+	10.8	0.982	52	56	12.1	4.64	3.93e-20	37.84	1.62e-65
chr5-30	chr5	92695476	92695602	+	10.8	0.631	59	56	2.8	20.09	7.68e-52	14.51	2.21e-44
chr5-45	chr5	95720274	95720400	+	10.8	0.735	54	56	8.4	6.7	1.7e-27	15.55	1.4e-43
chr5-31	chr5	139780696	139780822	+	10.8	0.78	58	56	4.6	12.06	3.29e-40	15.12	2.62e-45
chr5-42	chr5	145912940	145913066	+	10.8	0.695	55	56	6.5	8.61	8.11e-33	12.47	2.96e-40
chr6-186	chr6	2847066	2847192	+	10.8	0.625	55	56	13	4.31	1.01e-18	6.9	1.25e-27
chr6-174	chr6	7051107	7051233	+	10.8	0.808	56	56	8.4	6.7	1.7e-27	10.67	1.7e-37
chr6-167	chr6	16681874	16682000	+	10.8	0.747	57	56	7.4	7.54	5.77e-30	10.44	5.16e-37
chr6-249	chr6	25476397	25476523	+	10.8	0.637	50	56	7.4	7.54	5.77e-30	10.54	3.17e-37
chr6-160	chr6	29600959	29601085	+	10.8	0.74	58	58	10.2	5.68	6.56e-25	7.86	7.44e-31
chr6-178	chr6	31566406	31566532	+	10.8	0.873	56	56	4.6	12.06	3.29e-40	10.88	6.22e-38
chr6-164	chr6	36566738	36566864	+	10.8	0.689	58	56	6.5	8.61	8.11e-33	4.65	7.27e-20
chr6-165	chr6	37001067	37001193	+	10.8	0.742	58	56	5.6	10.05	3.6e-36	5.46	2.58e-23
chr6-223	chr6	37039656	37039782	+	10.8	0.605	52	56	7.4	7.54	5.77e-30	5.53	3.36e-23
chr6-279	chr6	37836454	37836580	+	10.8	0.646	49	57	11.1	5.11	2.15e-22	8.71	4.71e-33
chr6-182	chr6	47156330	47156456	+	10.8	0.753	56	56	4.6	12.06	3.29e-40	13.88	1.24e-42
chr6-185	chr6	166980771	166980897	+	10.8	0.732	56	56	8.4	6.7	1.7e-27	11.64	2e-39
chr8-49	chr8	125212425	125212551	+	10.8	0.626	58	57	10.2	5.58	3.74e-24	7.27	3.35e-29
chr8-54	chr8	127559700	127559826	+	10.8	0.731	57	56	2.8	20.09	7.68e-52	9.38	1.13e-34
chr9-37	chr9	36148780	36148906	+	10.8	0.859	57	56	6.5	8.61	8.11e-33	7.79	1.16e-30
chr9-38	chr9	113113489	113113615	+	10.8	0.742	57	57	2.8	20.45	3.75e-53	17.28	2.33e-48
chr9-36	chr9	114942733	114942859	+	10.8	0.647	58	56	4.6	12.06	3.29e-40	12.13	2.45e-40
chr9-33	chr9	133811992	133812118	+	10.8	0.706	59	57	4.6	12.27	2.68e-41	6.37	1.8e-26
chr10-53	chr10	17271362	17271488	+	10.8	0.575	58	59	4.6	12.7	1.68e-43	7.92	5.21e-31
chr10-70	chr10	99052352	99052478	+	10.8	0.701	55	56	8.4	6.7	1.7e-27	10.83	8.02e-38
chr11-61	chr11	1092802	1092928	+	10.8	0.592	56	56	13	4.31	1.01e-18	6.46	2.7e-26
chr11-44	chr11	8626040	8626166	+	10.8	0.6	61	56	6.5	8.61	8.11e-33	13.35	1.68e-42
chr11-57	chr11	12222502	12222628	+	10.8	0.628	57	56	3.7	15.07	3.06e-45	11.56	1.36e-38
chr12-63	chr12	94179209	94179335	+	10.8	0.698	54	56	5.6	10.05	3.6e-36	10.1	2.75e-36
chr12-64	chr12	95377523	95377649	+	10.8	0.833	54	56	0.9	60.28	8.95e-78	12.44	6.61e-41
chr12-61	chr12	110562091	110562217	+	10.8	0.787	55	56	4.6	12.06	3.29e-40	14.18	7.38e-44
chr12-54	chr12	122985550	122985676	+	10.8	0.728	58	56	5.6	10.05	3.6e-36	10.24	1.35e-36
chr13-3	chr13	27628469	27628595	+	10.8	0.714	55	56	2.8	20.09	7.68e-52	13.66	2.82e-42
chr14-64	chr14	52242836	52242962	+	10.8	0.723	51	56	4.6	12.06	3.29e-40	9.59	3.78e-35
chr16-37	chr16	67951933	67952059	+	10.8	0.68	58	56	4.6	12.06	3.29e-40	10.23	6.08e-36
chr16-38	chr16	84538432	84538558	+	10.8	0.765	58	56	8.4	6.7	1.7e-27	9.11	5e-34
chr17-63	chr17	824509	824635	+	10.8	0.703	58	56	3.7	15.07	3.06e-45	11.19	1.5e-38
chr17-71	chr17	35306157	35306283	+	10.8	0.641	56	56	0.5	120.57	1.98e-94	10.4	2.62e-36
chr17-73	chr17	39835409	39835535	+	10.8	0.657	56	56	4.6	12.06	3.29e-40	10.47	4.57e-37
chr17-81	chr17	42084337	42084463	+	10.8	0.786	55	56	6.5	8.61	8.11e-33	9.7	2.17e-35
chr18-34	chr18	702919	703045	+	10.8	0.813	53	56	0.9	60.28	8.95e-78	15.01	3.76e-45
chr19-122	chr19	11455194	11455320	+	10.8	0.735	56	56	4.6	12.06	3.29e-40	8.03	2.54e-31
chr19-118	chr19	12904379	12904505	+	10.8	0.693	57	56	13.9	4.02	1.93e-17	5.39	1.13e-22
chr19-112	chr19	13254057	13254183	+	10.8	0.617	58	56	8.4	6.7	1.7e-27	7.3	2.62e-29
chr19-133	chr19	13957458	13957584	+	10.8	0.581	55	56	7.4	7.54	5.77e-30	5.41	9.51e-23
chr19-119	chr19	16272851	16272977	+	10.8	0.677	57	57	5.6	10.23	3.51e-37	6.42	1.27e-26
chr19-149	chr19	19030221	19030347	+	10.8	0.663	53	56	2.8	20.09	7.68e-52	12.16	2.12e-40
chr19-125	chr19	38826325	38826451	+	10.8	0.762	56	56	1.9	30.14	2.63e-61	12.84	1.27e-41
chr20-77	chr20	32950954	32951080	+	10.8	0.84	53	56	5.6	10.05	3.6e-36	9.07	6.16e-34
chr20-64	chr20	33917427	33917553	+	10.8	0.71	56	56	13	4.31	1.01e-18	11.16	1.71e-38
chr20-59	chr20	35699950	35700076	+	10.8	0.689	58	57	4.6	12.27	2.68e-41	12.03	3.75e-40
chr20-66	chr20	45318357	45318483	+	10.8	0.619	56	58	3.7	15.61	1.28e-47	8.69	1.87e-32
chr1-150	chr1	26758740	26758866	+	10.6	0.73	54	55	9.3	5.92	1.51e-24	16.26	3.68e-46
chr1-142	chr1	145083533	145083659	+	10.6	0.663	55	56	9.3	6.03	2.5e-25	8.41	3.2e-31
chr1-147	chr1	202608809	202608935	+	10.6	0.732	55	55	3.7	14.8	4.62e-44	16.7	9.12e-47
chr1-148	chr1	204167954	204168080	+	10.6	0.714	55	55	8.4	6.58	1.14e-26	8.74	1.39e-32
chr1-130	chr1	219884064	219884190	+	10.6	0.793	57	55	3.7	14.8	4.62e-44	13.45	6.32e-42
chr1-149	chr1	224752931	224753057	+	10.6	0.67	55	55	5.6	9.87	3.62e-35	10.61	9.85e-37
chr2-131	chr2	65781888	65782014	+	10.6	0.646	51	56	3.7	15.07	3.06e-45	8.01	3.27e-30
chr2-104	chr2	72070634	72070760	+	10.6	0.8	57	55	5.6	9.87	3.62e-35	12.32	5.33e-40
chr3-37	chr3	9404631	9404757	+	10.6	0.814	54	55	7.4	7.4	4.36e-29	10.96	1.91e-37
chr3-40	chr3	183602611	183602737	+	10.6	0.654	54	55	2.8	19.74	1.55e-50	12.73	1.04e-40
chr3-42	chr3	194048892	194049018	+	10.6	0.744	54	56	7.4	7.54	5.77e-30	13.53	4.58e-42
chr4-40	chr4	99367848	99367974	+	10.6	0.695	57	55	6.5	8.46	7e-32	10.91	2.47e-37
chr5-39	chr5	53997141	53997267	+	10.6	0.67	55	55	9.3	5.92	1.51e-24	11.78	5.19e-39
chr5-49	chr5	133772709	133772835	+	10.6	0.7	53	55	8.4	6.58	1.14e-26	6.53	1.64e-26
chr5-41	chr5	142413427	142413553	+	10.6	0.793	55	56	7.4	7.54	5.77e-30	13.84	1.46e-42
chr6-187	chr6	2960707	2960833	+	10.6	0.767	55	55	7.4	7.4	4.36e-29	12.25	7.12e-40
chr6-188	chr6	4854565	4854691	+	10.6	0.691	55	56	4.6	12.06	3.29e-40	11.6	5.35e-38
chr6-168	chr6	16769514	16769640	+	10.6	0.689	57	55	6.5	8.46	7e-32	6.75	3.31e-27
chr6-177	chr6	30293545	30293671	+	10.6	0.725	56	55	4.6	11.84	3.97e-39	6.67	5.97e-27
chr6-195	chr6	30975600	30975726	+	10.6	0.75	54	56	1.9	30.14	2.63e-61	10.61	9.85e-37
chr6-146	chr6	37172351	37172477	+	10.6	0.657	60	55	6.5	8.46	7e-32	4.54	4.28e-19
chr6-156	chr6	42734210	42734336	+	10.6	0.74	59	55	11.1	4.93	5.56e-21	5.01	2.77e-21
chr6-181	chr6	43149823	43149949	+	10.6	0.637	56	55	11.1	4.93	5.56e-21	4.39	8.91e-19
chr6-158	chr6	48794632	48794758	+	10.6	0.734	59	55	1.9	29.6	7.94e-60	18.35	6.88e-49
chr6-183	chr6	55733906	55734032	+	10.6	0.762	56	55	4.6	11.84	3.97e-39	18.59	3.5e-49
chr10-74	chr10	114143230	114143356	+	10.6	0.783	54	55	2.8	19.74	1.55e-50	8.85	7.6e-33
chr10-61	chr10	114847111	114847237	+	10.6	0.719	56	55	3.7	14.8	4.62e-44	13.41	3.85e-41
chr10-78	chr10	121077092	121077218	+	10.6	0.803	53	55	2.8	19.74	1.55e-50	9.78	5.52e-35
chr11-138	chr11	6343445	6343571	+	10.6	0.759	46	56	7.4	7.54	5.77e-30	10.43	2.32e-36
chr11-66	chr11	8588253	8588379	+	10.6	0.759	55	55	5.6	9.87	3.62e-35	20.36	3.03e-51
chr11-67	chr11	10830580	10830706	+	10.6	0.8	55	55	6.5	8.46	7e-32	12.15	1.1e-39
chr11-59	chr11	73881900	73882026	+	10.6	0.688	57	55	4.6	11.84	3.97e-39	12.11	1.27e-39
chr11-81	chr11	105337413	105337539	+	10.6	0.753	54	55	0.9	59.21	5.4e-76	23.85	6.83e-54
chr12-60	chr12	92539553	92539679	+	10.6	0.786	55	56	4.6	12.06	3.29e-40	13.97	8.86e-43
chr12-57	chr12	95867827	95867953	+	10.6	0.72	56	55	6.5	8.46	7e-32	8.53	4.53e-32
chr12-56	chr12	109232082	109232208	+	10.6	0.667	57	55	6.5	8.46	7e-32	6.69	5.16e-27
chr14-50	chr14	75033538	75033664	+	10.6	0.735	56	56	5.6	10.05	3.6e-36	9.97	2.21e-35
chr14-49	chr14	93192570	93192696	+	10.6	0.651	57	57	3.7	15.34	1.99e-46	7.77	4.14e-30
chr14-57	chr14	105956052	105956178	+	10.6	0.75	54	55	10.2	5.38	1.15e-22	6.33	7.15e-26
chr15-5	chr15	35262027	35262153	+	10.6	0.753	55	55	2.8	19.74	1.55e-50	20.76	1.11e-51
chr15-4	chr15	40075045	40075171	+	10.6	0.822	56	55	1.9	29.6	7.94e-60	15.89	1.18e-45
chr15-3	chr15	69871266	69871392	+	10.6	0.59	57	56	0.9	60.28	8.95e-78	8.02	9.12e-31
chr15-10	chr15	73997281	73997407	+	10.6	0.714	51	55	2.8	19.74	1.55e-50	13.12	2.24e-41
chr16-42	chr16	15982446	15982572	+	10.6	0.756	56	56	0.5	120.57	1.98e-94	13.7	2.39e-42
chr17-85	chr17	71793	71919	+	10.6	0.849	54	55	8.4	6.58	1.14e-26	7.96	1.31e-30
chr17-88	chr17	5419545	5419671	+	10.6	0.759	54	55	4.6	11.84	3.97e-39	13.16	1.92e-41
chr17-69	chr17	7835419	7835545	+	10.6	0.7	56	56	5.6	10.05	3.6e-36	9.3	6.94e-34
chr17-64	chr17	21185615	21185741	+	10.6	0.827	58	56	2.8	20.09	7.68e-52	9.44	3.26e-34
chr17-65	chr17	30049285	30049411	+	10.6	0.645	58	55	4.6	11.84	3.97e-39	8.3	1.73e-31
chr17-82	chr17	46048315	46048441	+	10.6	0.69	55	55	5.6	9.87	3.62e-35	9.41	1.45e-33
chr17-99	chr17	61699493	61699619	+	10.6	0.663	53	55	2.8	19.74	1.55e-50	16.64	1.12e-46
chr17-75	chr17	70358700	70358826	+	10.6	0.617	56	55	4.6	11.84	3.97e-39	6.22	1.51e-25
chr17-94	chr17	76286032	76286158	+	10.6	0.786	54	55	5.6	9.87	3.62e-35	15.78	1.73e-45
chr17-77	chr17	78579587	78579713	+	10.6	0.8	56	55	6.5	8.46	7e-32	12.17	4.93e-39
chr17-78	chr17	78866791	78866917	+	10.6	0.703	56	56	0.9	60.28	8.95e-78	8.95	1.64e-32
chr17-96	chr17	80256274	80256400	+	10.6	0.645	54	55	3.7	14.8	4.62e-44	8.48	6.06e-32
chr19-123	chr19	13167071	13167197	+	10.6	0.677	56	56	4.6	12.06	3.29e-40	6.29	2.47e-25
chr19-132	chr19	13283278	13283404	+	10.6	0.61	55	55	6.5	8.46	7e-32	5.63	1.56e-23
chr19-139	chr19	17624567	17624693	+	10.6	0.667	54	55	3.7	14.8	4.62e-44	7.22	1.4e-28
chr19-136	chr19	40971850	40971976	+	10.6	0.736	55	55	3.7	14.8	4.62e-44	8.52	4.99e-32
chr19-144	chr19	58816682	58816808	+	10.6	0.855	54	56	4.6	12.06	3.29e-40	17.67	4.94e-48
chr20-70	chr20	35374612	35374738	+	10.6	0.697	55	55	4.6	11.84	3.97e-39	8.41	3.2e-31
chr20-82	chr20	52740250	52740376	+	10.6	0.764	52	55	10.2	5.38	1.15e-22	14.64	8.05e-44
chr22-4	chr22	38637007	38637133	+	10.6	0.778	56	55	3.7	14.8	4.62e-44	11.46	2.04e-38
chr1-132	chr1	33502504	33502630	+	10.4	0.78	56	54	4.6	11.63	4.71e-38	12.24	3.7e-39
chr1-138	chr1	36840151	36840277	+	10.4	0.661	55	55	4.6	11.84	3.97e-39	9.33	2.24e-33
chr1-165	chr1	78545434	78545560	+	10.4	0.847	52	54	3.7	14.53	6.85e-43	23.72	9.16e-54
chr1-166	chr1	93285713	93285839	+	10.4	0.678	52	54	7.4	7.27	3.24e-28	9.9	1.25e-34
chr1-154	chr1	110326099	110326225	+	10.4	0.738	54	54	8.4	6.46	7.54e-26	9.81	1.97e-34
chr1-140	chr1	144931990	144932116	+	10.4	0.62	55	55	11.1	4.93	5.56e-21	6.58	3.22e-26
chr1-115	chr1	161195443	161195569	+	10.4	0.845	59	54	4.6	11.63	4.71e-38	10.79	8.35e-36
chr1-155	chr1	233576679	233576805	+	10.4	0.779	54	54	3.7	14.53	6.85e-43	17.79	2.43e-47
chr2-105	chr2	10725067	10725193	+	10.4	0.676	56	54	3.7	14.53	6.85e-43	10.96	8.62e-37
chr2-102	chr2	38209404	38209530	+	10.4	0.747	57	54	2.8	19.38	3.05e-49	20.89	6.49e-51
chr2-113	chr2	62515198	62515324	+	10.4	0.667	54	54	4.6	11.63	4.71e-38	11.11	2.04e-36
chr3-29	chr3	11267584	11267710	+	10.4	0.652	57	55	7.4	7.4	4.36e-29	13.2	8.51e-41
chr3-34	chr3	65388317	65388443	+	10.4	0.673	55	54	5.6	9.69	3.58e-34	14.56	3.62e-42
chr3-47	chr3	72897585	72897711	+	10.4	0.785	53	54	6.5	8.3	5.94e-31	18.25	6.52e-48
chr3-39	chr3	100120286	100120412	+	10.4	0.735	54	54	5.6	9.69	3.58e-34	16.86	3.73e-46
chr3-36	chr3	196014540	196014666	+	10.4	0.685	55	54	8.4	6.46	7.54e-26	11.2	1.38e-36
chr5-37	chr5	73939148	73939274	+	10.4	0.743	56	54	5.6	9.69	3.58e-34	9.25	3.43e-33
chr6-213	chr6	2765604	2765730	+	10.4	0.757	52	54	5.6	9.69	3.58e-34	8.88	2.47e-32
chr6-230	chr6	11771238	11771364	+	10.4	0.653	51	55	5.6	9.87	3.62e-35	6.63	6.29e-26
chr6-159	chr6	28915761	28915887	+	10.4	0.693	58	55	6.5	8.46	7e-32	9.85	1.57e-34
chr6-219	chr6	31514464	31514590	+	10.4	0.615	52	54	3.7	14.53	6.85e-43	8.37	1.39e-30
chr6-207	chr6	32076224	32076350	+	10.4	0.596	53	54	12.1	4.47	8.38e-19	4.93	1.26e-20
chr6-191	chr6	36088666	36088792	+	10.4	0.632	55	54	7.4	7.27	3.24e-28	4.45	2.04e-18
chr6-210	chr6	37139914	37140040	+	10.4	0.613	53	54	10.2	5.28	6.23e-22	6.94	8.38e-27
chr6-194	chr6	52149473	52149599	+	10.4	0.677	55	54	6.5	8.3	5.94e-31	10.84	6.48e-36
chr7-31	chr7	155651581	155651707	+	10.4	0.696	55	54	9.3	5.81	8.99e-24	11.82	4.74e-37
chr8-90	chr8	105766776	105766902	+	10.4	0.713	48	54	6.5	8.3	5.94e-31	9.54	3.01e-33
chr8-53	chr8	110551739	110551865	+	10.4	0.593	57	54	3.7	14.53	6.85e-43	13.04	8.26e-40
chr8-72	chr8	122261109	122261235	+	10.4	0.702	50	54	7.4	7.27	3.24e-28	15.38	3.96e-44
chr8-46	chr8	124549980	124550106	+	10.4	0.752	59	55	3.7	14.8	4.62e-44	6.8	6.88e-27
chr8-52	chr8	146055484	146055610	+	10.4	0.701	58	54	6.5	8.3	5.94e-31	7.54	5.84e-29
chr9-35	chr9	112832040	112832166	+	10.4	0.65	58	55	9.3	5.92	1.51e-24	12.46	1.54e-39
chr9-40	chr9	132754267	132754393	+	10.4	0.714	55	55	3.7	14.8	4.62e-44	11.38	1.38e-37
chr9-46	chr9	140339851	140339977	+	10.4	0.657	53	54	3.7	14.53	6.85e-43	11.83	2.03e-38
chr10-59	chr10	33404696	33404822	+	10.4	0.779	56	55	6.5	8.46	7e-32	13.46	3.28e-41
chr10-67	chr10	76951946	76952072	+	10.4	0.827	55	54	4.6	11.63	4.71e-38	13.16	9.96e-41
chr10-60	chr10	80737736	80737862	+	10.4	0.629	56	55	3.7	14.8	4.62e-44	5.97	2.68e-24
chr11-68	chr11	16760068	16760194	+	10.4	0.579	55	54	4.6	11.63	4.71e-38	11.22	2.67e-37
chr11-78	chr11	35053598	35053724	+	10.4	0.885	54	55	1.9	29.6	7.94e-60	10.84	6.48e-36
chr11-79	chr11	36477465	36477591	+	10.4	0.77	54	55	3.7	14.8	4.62e-44	7.52	2.09e-28
chr11-63	chr11	46142963	46143089	+	10.4	0.779	56	54	4.6	11.63	4.71e-38	8.66	8.21e-32
chr11-70	chr11	61739347	61739473	+	10.4	0.774	55	55	2.8	19.74	1.55e-50	8.84	3.03e-32
chr11-90	chr11	62607041	62607167	+	10.4	0.833	52	54	4.6	11.63	4.71e-38	10.79	1.85e-36
chr11-71	chr11	63609074	63609200	+	10.4	0.787	55	54	1.9	29.07	2.35e-58	6.92	3.23e-27
chr11-73	chr11	125496339	125496465	+	10.4	0.731	55	54	3.7	14.53	6.85e-43	13.38	2.35e-40
chr11-92	chr11	125980185	125980311	+	10.4	0.69	52	54	3.7	14.53	6.85e-43	8.35	4.69e-31
chr12-65	chr12	80836774	80836900	+	10.4	0.803	53	54	7.4	7.27	3.24e-28	18.89	6.15e-47
chr12-75	chr12	95012897	95013023	+	10.4	0.745	50	54	10.2	5.28	6.23e-22	7.25	3.59e-28
chr13-4	chr13	75800368	75800494	+	10.4	0.805	55	54	2.8	19.38	3.05e-49	18.09	1.01e-47
chr14-58	chr14	21979521	21979647	+	10.4	0.689	53	54	1.9	29.07	2.35e-58	11.25	2.34e-37
chr14-60	chr14	102729361	102729487	+	10.4	0.795	53	54	8.4	6.46	7.54e-26	13.67	1.46e-41
chr15-61	chr15	80445468	80445594	+	10.4	0.822	36	54	11.1	4.84	2.76e-20	16.93	3.04e-46
chr17-79	chr17	7155429	7155555	+	10.4	0.681	55	54	6.5	8.3	5.94e-31	7.91	6.14e-30
chr17-72	chr17	38257530	38257656	+	10.4	0.767	56	54	7.4	7.27	3.24e-28	5.56	6.56e-23
chr17-84	chr17	53870759	53870885	+	10.4	0.84	55	54	7.4	7.27	3.24e-28	26.24	4.86e-56
chr19-110	chr19	10538924	10539050	+	10.4	0.717	58	54	9.3	5.81	8.99e-24	6.22	4.24e-25
chr19-131	chr19	13148106	13148232	+	10.4	0.762	55	54	7.4	7.27	3.24e-28	6.43	9.35e-26
chr19-124	chr19	14495164	14495290	+	10.4	0.646	56	54	2.8	19.38	3.05e-49	7.31	2.39e-28
chr19-121	chr19	45394035	45394161	+	10.4	0.588	57	54	5.6	9.69	3.58e-34	7.83	9.56e-30
chr19-137	chr19	54693615	54693741	+	10.4	0.649	55	54	11.1	4.84	2.76e-20	7.92	5.61e-30
chr22-5	chr22	42915822	42915948	+	10.4	0.648	54	54	5.6	9.69	3.58e-34	11.05	5.86e-37
chr1-151	chr1	27627415	27627541	+	10.2	0.683	54	53	5.6	9.51	3.47e-33	8.05	2.94e-29
chr1-164	chr1	78002550	78002676	+	10.2	0.727	52	53	4.6	11.41	5.49e-37	8.99	6.91e-31
chr1-128	chr1	87692187	87692313	+	10.2	0.627	57	53	2.8	19.02	5.92e-48	10.54	2.56e-35
chr1-141	chr1	145058636	145058762	+	10.2	0.669	55	53	11.1	4.75	1.34e-19	4.5	1.36e-18
chr1-143	chr1	155826953	155827079	+	10.2	0.886	55	53	4.6	11.41	5.49e-37	17.13	7.56e-45
chr1-160	chr1	172887246	172887372	+	10.2	0.725	53	53	3.7	14.26	9.97e-42	9.95	3.96e-34
chr1-146	chr1	201682617	201682743	+	10.2	0.789	55	53	4.6	11.41	5.49e-37	7.37	5.21e-28
chr1-162	chr1	202173638	202173764	+	10.2	0.779	53	53	7.4	7.13	2.36e-27	7.85	2.87e-29
chr2-112	chr2	47261380	47261506	+	10.2	0.623	54	54	4.6	11.63	4.71e-38	6.79	2.24e-26
chr2-130	chr2	65357226	65357352	+	10.2	0.71	51	53	4.6	11.41	5.49e-37	11.08	2.32e-36
chr2-108	chr2	85999667	85999793	+	10.2	0.707	55	53	5.6	9.51	3.47e-33	6.57	9.71e-26
chr3-51	chr3	11238209	11238335	+	10.2	0.771	51	54	4.6	11.63	4.71e-38	9.96	1.58e-33
chr3-44	chr3	43749607	43749733	+	10.2	0.727	53	53	0.9	57.05	1.86e-72	17.61	2.82e-46
chr3-35	chr3	185255194	185255320	+	10.2	0.71	55	56	6.5	8.61	8.11e-33	11.91	6.92e-38
chr3-53	chr3	194875978	194876104	+	10.2	0.744	51	53	3.7	14.26	9.97e-42	9.52	3.36e-33
chr4-46	chr4	3957227	3957353	+	10.2	0.694	55	53	6.5	8.15	4.94e-30	15.09	6.1e-43
chr4-109	chr4	40296250	40296376	+	10.2	0.836	41	53	5.6	9.51	3.47e-33	6.67	5.06e-26
chr5-57	chr5	73612234	73612360	+	10.2	0.653	52	53	6.5	8.15	4.94e-30	10.64	7.04e-35
chr5-44	chr5	81046919	81047045	+	10.2	0.78	54	53	4.6	11.41	5.49e-37	18.56	2.02e-47
chr5-46	chr5	124084531	124084657	+	10.2	0.731	54	54	2.8	19.38	3.05e-49	11.14	1.79e-36
chr5-40	chr5	137800723	137800849	+	10.2	0.753	55	54	8.4	6.46	7.54e-26	7.53	1.92e-28
chr6-175	chr6	12014771	12014897	+	10.2	0.711	56	54	6.5	8.3	5.94e-31	10.3	7.64e-35
chr6-217	chr6	24667120	24667246	+	10.2	0.634	52	53	9.3	5.71	5.24e-23	11.71	1.6e-37
chr6-196	chr6	31830762	31830888	+	10.2	0.75	54	54	10.2	5.28	6.23e-22	7.08	3.3e-27
chr6-190	chr6	33572915	33573041	+	10.2	0.693	55	53	3.7	14.26	9.97e-42	6.75	2.8e-26
chr6-238	chr6	37544336	37544462	+	10.2	0.621	51	53	11.1	4.75	1.34e-19	5.36	8.14e-22
chr6-201	chr6	42488868	42488994	+	10.2	0.732	54	53	10.2	5.19	3.3e-21	8.05	8.96e-30
chr6-211	chr6	43149507	43149633	+	10.2	0.615	53	53	8.4	6.34	4.89e-25	4.21	2.01e-17
chr6-227	chr6	150167597	150167723	+	10.2	0.744	52	53	0.5	114.11	3.28e-88	14.04	1.23e-40
chr8-60	chr8	67579439	67579565	+	10.2	0.765	53	53	2.8	19.02	5.92e-48	20.1	3.67e-49
chr8-95	chr8	123701890	123702016	+	10.2	0.778	47	53	2.8	19.02	5.92e-48	8.41	1.15e-30
chr9-42	chr9	2570685	2570811	+	10.2	0.661	54	53	2.8	19.02	5.92e-48	13.59	1.73e-38
chr9-48	chr9	82473515	82473641	+	10.2	0.722	52	54	2.8	19.38	3.05e-49	18.81	1.02e-47
chr9-44	chr9	91768510	91768636	+	10.2	0.598	54	53	5.6	9.51	3.47e-33	11.41	5.43e-37
chr9-53	chr9	127631294	127631420	+	10.2	0.784	51	53	7.4	7.13	2.36e-27	10.43	4.18e-35
chr10-71	chr10	32428344	32428470	+	10.2	0.745	54	53	6.5	8.15	4.94e-30	11.75	6.26e-37
chr10-84	chr10	34999522	34999648	+	10.2	0.747	51	53	1.9	28.53	6.84e-57	13.21	4.42e-40
chr10-69	chr10	95314660	95314786	+	10.2	0.696	55	54	3.7	14.53	6.85e-43	12.15	2.56e-38
chr10-87	chr10	121427421	121427547	+	10.2	0.656	51	53	3.7	14.26	9.97e-42	8.46	8.64e-31
chr11-74	chr11	6502631	6502757	+	10.2	0.724	54	53	5.6	9.51	3.47e-33	9.06	3.53e-32
chr11-76	chr11	18405339	18405465	+	10.2	0.673	54	53	3.7	14.26	9.97e-42	9.39	6.47e-33
chr11-77	chr11	27528303	27528429	+	10.2	0.717	54	53	5.6	9.51	3.47e-33	15.25	2.17e-42
chr11-95	chr11	34621096	34621222	+	10.2	0.771	51	53	0.9	57.05	1.86e-72	9.81	7.88e-34
chr11-84	chr11	61022014	61022140	+	10.2	0.795	53	53	4.6	11.41	5.49e-37	12.56	5.12e-39
chr11-91	chr11	64052152	64052278	+	10.2	0.663	52	54	5.6	9.69	3.58e-34	9.81	7.88e-34
chr11-72	chr11	122513420	122513546	+	10.2	0.689	55	53	4.6	11.41	5.49e-37	10.15	1.56e-34
chr12-58	chr12	96199908	96200034	+	10.2	0.56	56	53	8.4	6.34	4.89e-25	11.17	1.57e-36
chr14-65	chr14	53019191	53019317	+	10.2	0.678	51	53	7.4	7.13	2.36e-27	8.98	5.33e-32
chr14-61	chr14	64805581	64805707	+	10.2	0.681	52	53	4.6	11.41	5.49e-37	12.6	4.41e-39
chr14-53	chr14	101132137	101132263	+	10.2	0.664	55	54	11.1	4.84	2.76e-20	8.48	7.85e-31
chr14-56	chr14	103576179	103576305	+	10.2	0.71	54	54	6.5	8.3	5.94e-31	8.16	4.72e-30
chr15-6	chr15	67467488	67467614	+	10.2	0.841	54	53	2.8	19.02	5.92e-48	14.26	1.02e-41
chr17-80	chr17	14109307	14109433	+	10.2	0.714	55	53	2.8	19.02	5.92e-48	11.67	1.83e-37
chr17-89	chr17	28443728	28443854	+	10.2	0.73	54	53	4.6	11.41	5.49e-37	16.42	9.38e-45
chr17-93	chr17	75401067	75401193	+	10.2	0.663	54	53	2.8	19.02	5.92e-48	8.47	2.83e-30
chr17-95	chr17	78807010	78807136	+	10.2	0.689	54	53	5.6	9.51	3.47e-33	11.55	1.43e-36
chr19-129	chr19	6273832	6273958	+	10.2	0.733	55	53	2.8	19.02	5.92e-48	7.62	1.15e-28
chr19-145	chr19	10828370	10828496	+	10.2	0.602	53	53	9.3	5.71	5.24e-23	8.3	7.33e-30
chr19-138	chr19	11679064	11679190	+	10.2	0.71	54	54	10.2	5.28	6.23e-22	9.04	3.91e-32
chr19-141	chr19	18439344	18439470	+	10.2	0.736	54	53	7.4	7.13	2.36e-27	8.73	1.99e-31
chr19-148	chr19	18527289	18527415	+	10.2	0.734	53	53	7.4	7.13	2.36e-27	6.4	3.24e-25
chr19-135	chr19	36505087	36505213	+	10.2	0.642	55	53	2.8	19.02	5.92e-48	9.56	1.08e-32
chr19-159	chr19	40476993	40477119	+	10.2	0.694	52	53	4.6	11.41	5.49e-37	11.14	1.79e-36
chr19-143	chr19	41283995	41284121	+	10.2	0.629	54	54	5.6	9.69	3.58e-34	6.81	1.93e-26
chr20-72	chr20	3389443	3389569	+	10.2	0.753	54	53	2.8	19.02	5.92e-48	12.72	2.81e-39
chr20-69	chr20	30162121	30162247	+	10.2	0.63	55	53	5.6	9.51	3.47e-33	6.53	1.29e-25
chr20-78	chr20	36166558	36166684	+	10.2	0.737	53	53	2.8	19.02	5.92e-48	8.14	5.17e-30
chr20-73	chr20	44509726	44509852	+	10.2	0.826	54	53	11.1	4.75	1.34e-19	10.59	2e-35
chr20-71	chr20	49963740	49963866	+	10.2	0.597	55	53	6.5	8.15	4.94e-30	5.14	4.98e-21
chr21-30	chr21	38738875	38739001	+	10.2	0.747	52	53	3.7	14.26	9.97e-42	21.46	1.34e-50
chrX-23	chrX	100353080	100353206	+	10.2	0.785	53	53	3.7	14.26	9.97e-42	25.28	3.29e-54
chrX-20	chrX	131625317	131625443	+	10.2	0.814	55	53	0.9	57.05	1.86e-72	20.11	2.78e-48
chrX-21	chrX	148621024	148621150	+	10.2	0.594	55	53	0.5	114.11	3.28e-88	12.56	5.12e-39
chr1-174	chr1	28455757	28455883	+	9.98	0.739	51	52	3.7	13.99	1.42e-40	16.25	6.42e-43
chr1-184	chr1	33455021	33455147	+	9.98	0.75	50	52	3.7	13.99	1.42e-40	7.64	3.19e-28
chr1-139	chr1	45142259	45142385	+	9.98	0.756	55	53	1.9	28.53	6.84e-57	6.74	9.12e-26
chr1-152	chr1	68257473	68257599	+	9.98	0.664	54	52	4.6	11.2	6.27e-36	9.94	7.11e-33
chr1-144	chr1	156860017	156860143	+	9.98	0.842	55	53	2.8	19.02	5.92e-48	12.52	3.09e-38
chr1-179	chr1	223963937	223964063	+	9.98	0.667	51	52	4.6	11.2	6.27e-36	10.06	9.96e-34
chr2-111	chr2	11837703	11837829	+	9.98	0.725	54	53	6.5	8.15	4.94e-30	9.31	3.57e-32
chr2-123	chr2	27712608	27712734	+	9.98	0.772	52	52	4.6	11.2	6.27e-36	15.73	4.88e-43
chr2-124	chr2	39675401	39675527	+	9.98	0.803	52	52	6.5	8	4.04e-29	16.11	1.54e-43
chr2-128	chr2	43449165	43449291	+	9.98	0.783	51	52	1.9	27.99	1.95e-55	8.38	5.92e-29
chr2-129	chr2	44327613	44327739	+	9.98	0.8	51	52	4.6	11.2	6.27e-36	11.65	9.47e-37
chr2-127	chr2	99797579	99797705	+	9.98	0.808	52	52	6.5	8	4.04e-29	16.17	1.27e-43
chr2-134	chr2	113238732	113238858	+	9.98	0.781	51	52	2.8	18.66	1.13e-46	16.18	7.8e-43
chr3-45	chr3	50285933	50286059	+	9.98	0.807	53	52	4.6	11.2	6.27e-36	8.54	6.91e-30
chr3-48	chr3	169477317	169477443	+	9.98	0.747	53	52	4.6	11.2	6.27e-36	16.5	4.72e-44
chr3-50	chr3	184529890	184530016	+	9.98	0.673	52	52	5.6	9.33	3.31e-32	10.04	4.47e-33
chr3-41	chr3	193310707	193310833	+	9.98	0.742	54	52	3.7	13.99	1.42e-40	11.85	4.13e-37
chr4-49	chr4	120133520	120133646	+	9.98	0.685	54	52	5.6	9.33	3.31e-32	11.58	1.25e-36
chr5-54	chr5	34924183	34924309	+	9.98	0.838	52	52	1.9	27.99	1.95e-55	23.92	5.06e-52
chr5-52	chr5	141768418	141768544	+	9.98	0.681	53	53	3.7	14.26	9.97e-42	9.88	2.24e-33
chr5-60	chr5	158938711	158938837	+	9.98	0.651	52	52	4.6	11.2	6.27e-36	10.45	1.67e-34
chr5-53	chr5	159247077	159247203	+	9.98	0.607	53	52	3.7	13.99	1.42e-40	8.73	7.16e-31
chr6-214	chr6	3978596	3978722	+	9.98	0.67	52	52	10.2	5.09	1.72e-20	8.02	3.52e-29
chr6-327	chr6	26402596	26402722	+	9.98	0.748	46	53	5.6	9.51	3.47e-33	9.67	6.2e-33
chr6-208	chr6	33359254	33359380	+	9.98	0.598	53	52	5.6	9.33	3.31e-32	7.85	9.43e-29
chr6-236	chr6	35286269	35286395	+	9.98	0.598	51	52	12.1	4.31	1.66e-17	5.34	2.25e-21
chr6-221	chr6	35369242	35369368	+	9.98	0.59	52	52	9.3	5.6	3e-22	4.07	1.62e-16
chr6-209	chr6	35570150	35570276	+	9.98	0.677	53	52	9.3	5.6	3e-22	8.75	6.48e-31
chr6-258	chr6	39393907	39394033	+	9.98	0.677	50	52	0.9	55.98	1.06e-70	8.83	1.56e-30
chr6-202	chr6	42981864	42981990	+	9.98	0.667	54	53	13	4.08	7.72e-17	4.35	1.14e-17
chr6-283	chr6	43138491	43138617	+	9.98	0.633	49	52	9.3	5.6	3e-22	4.72	3.86e-19
chr7-37	chr7	102389219	102389345	+	9.98	0.791	51	52	1.9	27.99	1.95e-55	34.85	3.13e-60
chr7-30	chr7	105705468	105705594	+	9.98	0.756	55	52	6.5	8	4.04e-29	17.65	1.72e-45
chr8-66	chr8	101964369	101964495	+	9.98	0.716	51	52	2.8	18.66	1.13e-46	8.81	4.8e-31
chr8-67	chr8	118342472	118342598	+	9.98	0.793	51	52	6.5	8	4.04e-29	8.71	7.91e-31
chr8-63	chr8	124253598	124253724	+	9.98	0.728	52	52	4.6	11.2	6.27e-36	13.43	1.04e-39
chr9-45	chr9	33081413	33081539	+	9.98	0.809	53	52	2.8	18.66	1.13e-46	14.44	3.15e-41
chr9-57	chr9	96215791	96215917	+	9.98	0.762	50	52	6.5	8	4.04e-29	15.73	3.01e-42
chr9-59	chr9	130646797	130646923	+	9.98	0.707	50	52	5.6	9.33	3.31e-32	11.17	6.52e-34
chr10-80	chr10	26775310	26775436	+	9.98	0.73	52	52	5.6	9.33	3.31e-32	11.17	7.08e-36
chr10-68	chr10	95228429	95228555	+	9.98	0.6	55	53	2.8	19.02	5.92e-48	8.42	3.77e-30
chr10-77	chr10	99629261	99629387	+	9.98	0.741	53	52	9.3	5.6	3e-22	11.48	1.87e-36
chr10-62	chr10	126030533	126030659	+	9.98	0.742	56	53	2.8	19.02	5.92e-48	9.02	1.56e-31
chr10-75	chr10	126790963	126791089	+	9.98	0.708	54	52	2.8	18.66	1.13e-46	9.23	5.47e-32
chr10-227	chr10	135460734	135460860	+	9.98	0.929	38	52	2.8	18.66	1.13e-46	49.91	3.78e-68
chr11-82	chr11	2954740	2954866	+	9.98	0.824	53	53	2.8	19.02	5.92e-48	9.96	1.58e-33
chr11-96	chr11	45921323	45921449	+	9.98	0.831	51	52	5.6	9.33	3.31e-32	9.88	2.24e-33
chr11-87	chr11	86454972	86455098	+	9.98	0.739	53	52	3.7	13.99	1.42e-40	6.84	4.65e-26
chr12-74	chr12	72057542	72057668	+	9.98	0.653	50	52	8.4	6.22	3.11e-24	20.01	3.56e-48
chr12-62	chr12	90484742	90484868	+	9.98	0.716	54	52	3.7	13.99	1.42e-40	17.06	9.3e-45
chr12-70	chr12	102455828	102455954	+	9.98	0.779	51	52	8.4	6.22	3.11e-24	11.72	7.19e-37
chr13-5	chr13	24370797	24370923	+	9.98	0.756	50	52	1.9	27.99	1.95e-55	20.52	1.03e-48
chr14-74	chr14	54976513	54976639	+	9.98	0.654	49	52	7.4	7	1.69e-26	6.25	2.55e-24
chr15-7	chr15	65176308	65176434	+	9.98	0.784	52	52	3.7	13.99	1.42e-40	16.66	1.94e-43
chr16-44	chr16	4993368	4993494	+	9.98	0.624	55	52	2.8	18.66	1.13e-46	8.51	2.33e-30
chr17-86	chr17	964311	964437	+	9.98	0.775	54	52	2.8	18.66	1.13e-46	5.73	1.07e-22
chr17-106	chr17	36062871	36062997	+	9.98	0.781	51	52	3.7	13.99	1.42e-40	11.32	3.66e-36
chr17-107	chr17	36184620	36184746	+	9.98	0.785	51	52	5.6	9.33	3.31e-32	12.32	6.44e-38
chr17-90	chr17	38109058	38109184	+	9.98	0.589	54	53	0.9	57.05	1.86e-72	8.64	1.18e-30
chr17-74	chr17	40075212	40075338	+	9.98	0.617	56	52	5.6	9.33	3.31e-32	10.16	6.23e-34
chr17-83	chr17	46560889	46561015	+	9.98	0.73	55	52	5.6	9.33	3.31e-32	7.6	4.12e-28
chr18-35	chr18	68051741	68051867	+	9.98	0.735	53	52	4.6	11.2	6.27e-36	18.72	9.73e-47
chr19-154	chr19	11253384	11253510	+	9.98	0.733	52	52	4.6	11.2	6.27e-36	5.65	5.13e-22
chr19-177	chr19	16358577	16358703	+	9.98	0.718	50	53	4.6	11.41	5.49e-37	10.32	1.22e-33
chr19-146	chr19	17420150	17420276	+	9.98	0.695	53	52	7.4	7	1.69e-26	4.34	1.19e-17
chr19-140	chr19	18263256	18263382	+	9.98	0.713	54	52	9.3	5.6	3e-22	5.69	3.8e-22
chr19-157	chr19	39569656	39569782	+	9.98	0.706	52	52	7.4	7	1.69e-26	12.48	3.58e-38
chr19-160	chr19	45188491	45188617	+	9.98	0.616	52	52	4.6	11.2	6.27e-36	8.62	1.3e-30
chr19-152	chr19	47616461	47616587	+	9.98	0.673	53	52	5.6	9.33	3.31e-32	10.55	1.02e-34
chr20-85	chr20	36801950	36802076	+	9.98	0.724	51	53	7.4	7.13	2.36e-27	7.82	1.12e-28
chr20-74	chr20	49971119	49971245	+	9.98	0.67	54	52	4.6	11.2	6.27e-36	5.26	1.02e-20
chr20-79	chr20	61306930	61307056	+	9.98	0.744	53	52	12.1	4.31	1.66e-17	8.36	1.81e-29
chrX-24	chrX	110284345	110284471	+	9.98	0.695	52	53	0.9	57.05	1.86e-72	17.54	1.62e-44
chrX-26	chrX	130927134	130927260	+	9.98	0.759	51	52	0.9	55.98	1.06e-70	26.08	6.73e-54
chr1-176	chr1	86016620	86016746	+	9.79	0.687	51	51	8.4	6.1	1.94e-23	9.67	2.48e-32
chr1-167	chr1	150505182	150505308	+	9.79	0.759	52	52	5.6	9.33	3.31e-32	10.92	9.01e-35
chr1-161	chr1	193028458	193028584	+	9.79	0.731	53	51	1.9	27.45	5.47e-54	15.43	7.69e-42
chr1-193	chr1	204485387	204485513	+	9.79	0.682	50	51	3.7	13.73	2e-39	10.11	3.15e-33
chr1-169	chr1	204490459	204490585	+	9.79	0.711	52	51	8.4	6.1	1.94e-23	9.14	3.33e-31
chr1-170	chr1	224356805	224356931	+	9.79	0.623	52	51	5.6	9.15	3.1e-31	11.67	1.93e-35
chr1-181	chr1	235002346	235002472	+	9.79	0.678	51	51	3.7	13.73	2e-39	7.16	1.88e-26
chr2-125	chr2	64019791	64019917	+	9.79	0.826	52	51	3.7	13.73	2e-39	18.02	4.42e-45
chr2-117	chr2	86121193	86121319	+	9.79	0.676	53	51	0.5	109.8	4.19e-84	8.09	9.48e-28
chr2-118	chr2	86850951	86851077	+	9.79	0.841	53	51	6.5	7.84	3.24e-28	11.87	1.86e-36
chr3-77	chr3	14167356	14167482	+	9.79	0.753	46	51	7.4	6.86	1.18e-25	13.04	2.23e-38
chr3-52	chr3	41316482	41316608	+	9.79	0.723	51	51	7.4	6.86	1.18e-25	17.94	5.5e-45
chr3-49	chr3	46441771	46441897	+	9.79	0.674	52	51	2.8	18.3	2.11e-45	7.96	1.66e-28
chr3-46	chr3	57332228	57332354	+	9.79	0.851	53	51	2.8	18.3	2.11e-45	16.61	1.46e-42
chr5-73	chr5	83583901	83584027	+	9.79	0.8	49	51	5.6	9.15	3.1e-31	17.02	7.01e-44
chr5-59	chr5	114797382	114797508	+	9.79	0.803	52	51	6.5	7.84	3.24e-28	11.11	4.15e-35
chr5-51	chr5	141721947	141722073	+	9.79	0.765	53	52	3.7	13.99	1.42e-40	11.91	1.61e-36
chr5-61	chr5	159688144	159688270	+	9.79	0.707	52	51	4.6	10.98	7.04e-35	10.92	9.01e-35
chr5-43	chr5	171788603	171788729	+	9.79	0.74	55	51	5.6	9.15	3.1e-31	11.84	2.14e-36
chr6-264	chr6	6467663	6467789	+	9.79	0.684	49	51	8.4	6.1	1.94e-23	9.09	4.11e-31
chr6-215	chr6	8102776	8102902	+	9.79	0.774	52	51	2.8	18.3	2.11e-45	11.66	4.27e-36
chr6-244	chr6	9127576	9127702	+	9.79	0.636	50	51	3.7	13.73	2e-39	8.69	3.15e-30
chr6-248	chr6	11921398	11921524	+	9.79	0.645	50	51	11.1	4.58	3e-18	8.69	3.15e-30
chr6-205	chr6	17600409	17600535	+	9.79	0.719	53	52	10.2	5.09	1.72e-20	11.43	1.11e-35
chr6-206	chr6	19867529	19867655	+	9.79	0.685	53	52	10.2	5.09	1.72e-20	9.14	3.33e-31
chr6-270	chr6	30736877	30737003	+	9.79	0.623	49	51	5.6	9.15	3.1e-31	4.65	3.36e-18
chr6-234	chr6	31707637	31707763	+	9.79	0.709	51	51	4.6	10.98	7.04e-35	5.01	7.78e-20
chr6-220	chr6	32143953	32144079	+	9.79	0.673	52	51	9.3	5.49	1.69e-21	4.26	1.01e-16
chr6-200	chr6	39906750	39906876	+	9.79	0.651	54	51	6.5	7.84	3.24e-28	6.77	6.18e-25
chr6-282	chr6	42847581	42847707	+	9.79	0.706	49	52	10.2	5.09	1.72e-20	4.8	4.33e-19
chr6-225	chr6	44355191	44355317	+	9.79	0.646	52	51	6.5	7.84	3.24e-28	7.33	6.6e-27
chr6-203	chr6	51885848	51885974	+	9.79	0.863	54	51	2.8	18.3	2.11e-45	14.21	1.22e-38
chr6-226	chr6	75918785	75918911	+	9.79	0.787	52	51	7.4	6.86	1.18e-25	8.52	2.74e-29
chr6-212	chr6	167104762	167104888	+	9.79	0.714	53	51	1.9	27.45	5.47e-54	12.75	6.52e-38
chr7-46	chr7	29146124	29146250	+	9.79	0.841	48	51	6.5	7.84	3.24e-28	23.32	1.62e-50
chr7-45	chr7	158622290	158622416	+	9.79	0.732	49	51	7.4	6.86	1.18e-25	9.16	3e-31
chr8-77	chr8	19029316	19029442	+	9.79	0.635	49	51	7.4	6.86	1.18e-25	14.45	1e-39
chr8-71	chr8	103922205	103922331	+	9.79	0.728	50	51	2.8	18.3	2.11e-45	8.95	8.48e-31
chr8-89	chr8	104457929	104458055	+	9.79	0.792	48	51	4.6	10.98	7.04e-35	15.19	1.61e-41
chr8-73	chr8	124532739	124532865	+	9.79	0.641	50	51	4.6	10.98	7.04e-35	6.88	3.14e-25
chr8-74	chr8	126525385	126525511	+	9.79	0.838	50	51	6.5	7.84	3.24e-28	8.33	2.19e-29
chr8-51	chr8	144512949	144513075	+	9.79	0.851	58	52	6.5	8	4.04e-29	9.33	1.28e-31
chr9-54	chr9	132601140	132601266	+	9.79	0.702	51	51	6.5	7.84	3.24e-28	11.01	6.13e-35
chr9-55	chr9	135383128	135383254	+	9.79	0.789	51	51	6.5	7.84	3.24e-28	12.58	6.19e-37
chr10-79	chr10	25351536	25351662	+	9.79	0.767	52	52	4.6	11.2	6.27e-36	9.99	5.65e-33
chr10-72	chr10	70821148	70821274	+	9.79	0.727	54	51	2.8	18.3	2.11e-45	10.46	6.64e-34
chr10-88	chr10	122268099	122268225	+	9.79	0.705	51	51	1.9	27.45	5.47e-54	13.08	1.91e-38
chr11-85	chr11	62521270	62521396	+	9.79	0.69	53	51	2.8	18.3	2.11e-45	10.77	1.7e-34
chr11-99	chr11	64691611	64691737	+	9.79	0.805	50	52	7.4	7	1.69e-26	8.03	1.16e-28
chr11-86	chr11	66738555	66738681	+	9.79	0.625	53	51	10.2	4.99	8.8e-20	7.09	2.79e-26
chr11-126	chr11	76480841	76480967	+	9.79	0.718	48	51	8.4	6.1	1.94e-23	7.95	5.96e-28
chr12-77	chr12	109899050	109899176	+	9.79	0.72	50	51	9.3	5.49	1.69e-21	8.4	1.49e-29
chr13-6	chr13	45496632	45496758	+	9.79	0.779	50	51	2.8	18.3	2.11e-45	8.25	4.13e-28
chr13-8	chr13	106808985	106809111	+	9.79	0.636	46	51	1.9	27.45	5.47e-54	15.37	9.25e-42
chr14-59	chr14	35761457	35761583	+	9.79	0.741	53	51	6.5	7.84	3.24e-28	11.39	1.26e-35
chr14-67	chr14	73212382	73212508	+	9.79	0.818	51	51	1.9	27.45	5.47e-54	10.8	1.5e-34
chr14-63	chr14	75046562	75046688	+	9.79	0.657	52	51	9.3	5.49	1.69e-21	7.57	1.6e-27
chr14-71	chr14	75701399	75701525	+	9.79	0.81	50	51	8.4	6.1	1.94e-23	12.31	3.34e-37
chr14-55	chr14	100687964	100688090	+	9.79	0.646	54	52	1.9	27.99	1.95e-55	8.31	2.4e-29
chr15-13	chr15	33159581	33159707	+	9.79	0.87	50	51	4.6	10.98	7.04e-35	19.63	7.13e-47
chr15-11	chr15	74838683	74838809	+	9.79	0.663	51	51	2.8	18.3	2.11e-45	15.12	1.19e-40
chr17-101	chr17	1521135	1521261	+	9.79	0.692	52	51	3.7	13.73	2e-39	11.26	2.15e-35
chr17-108	chr17	38459370	38459496	+	9.79	0.677	51	51	4.6	10.98	7.04e-35	10.49	5.88e-34
chr17-91	chr17	41150330	41150456	+	9.79	0.775	54	51	5.6	9.15	3.1e-31	11.96	6.31e-36
chr17-125	chr17	44842133	44842259	+	9.79	0.704	49	51	4.6	10.98	7.04e-35	10.21	3.53e-32
chr17-102	chr17	46564097	46564223	+	9.79	0.607	52	51	4.6	10.98	7.04e-35	7.26	9.91e-27
chr17-98	chr17	55945614	55945740	+	9.79	0.697	53	52	9.3	5.6	3e-22	8.29	2.64e-29
chr17-103	chr17	78621571	78621697	+	9.79	0.609	52	53	6.5	8.15	4.94e-30	10.01	5.03e-33
chr19-128	chr19	3155183	3155309	+	9.79	0.792	55	52	5.6	9.33	3.31e-32	13.3	8.71e-39
chr19-173	chr19	7069651	7069777	+	9.79	0.728	50	51	6.5	7.84	3.24e-28	9.49	6.01e-32
chr19-155	chr19	17428294	17428420	+	9.79	0.726	52	51	5.6	9.15	3.1e-31	6.13	1.6e-23
chr19-147	chr19	18434074	18434200	+	9.79	0.65	53	52	8.4	6.22	3.11e-24	6.99	5.21e-26
chr19-168	chr19	34723864	34723990	+	9.79	0.577	51	51	1.9	27.45	5.47e-54	11.04	5.38e-35
chr19-156	chr19	38878333	38878459	+	9.79	0.684	52	51	4.6	10.98	7.04e-35	6.11	1.82e-23
chr19-142	chr19	38878875	38879001	+	9.79	0.504	54	51	3.7	13.73	2e-39	5.86	1.11e-22
chr19-158	chr19	39939006	39939132	+	9.79	0.673	52	51	5.6	9.15	3.1e-31	5.34	5.55e-21
chr19-183	chr19	55999052	55999178	+	9.79	0.831	50	51	0.9	54.9	5.93e-69	10.71	9.86e-34
chr20-81	chr20	30945938	30946064	+	9.79	0.659	52	53	1.9	28.53	6.84e-57	8.81	6.22e-30
chr20-89	chr20	33461953	33462079	+	9.79	0.655	50	51	4.6	10.98	7.04e-35	4.68	2.53e-18
chr20-86	chr20	44462118	44462244	+	9.79	0.701	51	51	6.5	7.84	3.24e-28	5.62	6.52e-22
chr1-175	chr1	64164095	64164221	+	9.6	0.663	51	50	6.5	7.69	2.55e-27	8.15	2e-28
chr1-187	chr1	94167414	94167540	+	9.6	0.652	50	50	4.6	10.77	7.74e-34	8.94	3.38e-30
chr1-191	chr1	173362418	173362544	+	9.6	0.69	50	50	3.7	13.46	2.74e-38	13.5	2.39e-38
chr1-206	chr1	201431070	201431196	+	9.6	0.735	49	50	1.9	26.91	1.5e-52	7.12	7.21e-26
chr1-180	chr1	234908106	234908232	+	9.6	0.736	51	50	1.9	26.91	1.5e-52	8.36	6.51e-29
chr2-115	chr2	23634764	23634890	+	9.6	0.711	53	50	6.5	7.69	2.55e-27	10.48	2.65e-33
chr2-151	chr2	74153846	74153972	+	9.6	0.66	48	50	3.7	13.46	2.74e-38	10.26	6.96e-33
chr2-138	chr2	98485819	98485945	+	9.6	0.681	50	50	2.8	17.94	3.86e-44	9.74	2.83e-31
chr3-60	chr3	184052291	184052417	+	9.6	0.689	49	50	3.7	13.46	2.74e-38	7.28	8.35e-26
chr3-57	chr3	187465916	187466042	+	9.6	0.732	50	51	1.9	27.45	5.47e-54	9.48	2.4e-31
chr3-62	chr3	197033367	197033493	+	9.6	0.775	49	50	2.8	17.94	3.86e-44	13.93	5.47e-39
chr5-47	chr5	33772497	33772623	+	9.6	0.742	53	50	4.6	10.77	7.74e-34	13.04	1.16e-37
chr5-56	chr5	61699789	61699915	+	9.6	0.763	52	51	0.9	54.9	5.93e-69	10.71	9.86e-34
chr5-58	chr5	81121166	81121292	+	9.6	0.602	52	51	3.7	13.73	2e-39	10.26	6.96e-33
chr5-64	chr5	159592829	159592955	+	9.6	0.73	51	50	2.8	17.94	3.86e-44	10.89	4.62e-34
chr5-70	chr5	174673427	174673553	+	9.6	0.618	50	50	4.6	10.77	7.74e-34	8.85	5.08e-30
chr5-65	chr5	175866116	175866242	+	9.6	0.742	51	50	8.4	5.98	1.19e-22	15.07	1.42e-40
chr5-66	chr5	176853368	176853494	+	9.6	0.708	51	50	4.6	10.77	7.74e-34	9.89	3.58e-32
chr6-247	chr6	11277588	11277714	+	9.6	0.58	50	50	4.6	10.77	7.74e-34	7.7	2.44e-27
chr6-216	chr6	14744188	14744314	+	9.6	0.685	52	50	5.6	8.97	2.84e-30	8.38	5.92e-29
chr6-268	chr6	26421617	26421743	+	9.6	0.762	49	50	9.3	5.38	9.31e-21	10.31	5.48e-33
chr6-269	chr6	27577216	27577342	+	9.6	0.75	49	50	8.4	5.98	1.19e-22	11.17	1.44e-34
chr6-253	chr6	31213823	31213949	+	9.6	0.795	50	50	9.3	5.38	9.31e-21	21.45	5.62e-46
chr6-331	chr6	35435720	35435846	+	9.6	0.625	46	50	6.5	7.69	2.55e-27	4.54	8.54e-18
chr6-309	chr6	37070535	37070661	+	9.6	0.602	47	50	10.2	4.89	4.41e-19	5.43	6.55e-21
chr6-239	chr6	41536460	41536586	+	9.6	0.651	51	50	9.3	5.38	9.31e-21	4.52	1.03e-17
chr6-260	chr6	44032303	44032429	+	9.6	0.663	50	50	12.1	4.14	3.06e-16	5.81	1.04e-21
chr6-284	chr6	54200730	54200856	+	9.6	0.682	49	50	8.4	5.98	1.19e-22	12.34	1.5e-36
chr6-243	chr6	64373492	64373618	+	9.6	0.831	51	50	4.6	10.77	7.74e-34	14.19	2.36e-39
chr7-34	chr7	34788188	34788314	+	9.6	0.803	51	50	2.8	17.94	3.86e-44	17.67	7.97e-44
chr7-36	chr7	73989840	73989966	+	9.6	0.821	51	51	4.6	10.98	7.04e-35	16.88	3e-41
chr7-39	chr7	149255582	149255708	+	9.6	0.565	51	52	5.6	9.33	3.31e-32	10.88	2.09e-33
chr8-62	chr8	119030890	119031016	+	9.6	0.659	52	50	6.5	7.69	2.55e-27	7.38	4.71e-26
chr8-59	chr8	119121150	119121276	+	9.6	0.679	54	50	6.5	7.69	2.55e-27	6.53	2.86e-24
chr8-106	chr8	131074767	131074893	+	9.6	0.707	46	50	0.9	53.83	3.26e-67	8.27	1.04e-28
chr9-49	chr9	35906092	35906218	+	9.6	0.75	51	50	8.4	5.98	1.19e-22	8.01	4.16e-28
chr9-50	chr9	93833544	93833670	+	9.6	0.685	51	50	1.9	26.91	1.5e-52	10.68	1.12e-33
chr9-51	chr9	115512807	115512933	+	9.6	0.727	51	50	7.4	6.73	8.15e-25	10.1	5.66e-32
chr9-52	chr9	116382895	116383021	+	9.6	0.737	51	50	1.9	26.91	1.5e-52	8.98	9.92e-30
chr10-76	chr10	3581412	3581538	+	9.6	0.75	53	50	4.6	10.77	7.74e-34	13.5	2.39e-38
chr10-89	chr10	4583502	4583628	+	9.6	0.58	50	50	2.8	17.94	3.86e-44	15.74	1.85e-41
chr10-81	chr10	64492850	64492976	+	9.6	0.821	52	51	5.6	9.15	3.1e-31	13.54	2.03e-38
chr10-82	chr10	73620279	73620405	+	9.6	0.653	52	50	5.6	8.97	2.84e-30	8.98	2.76e-30
chr10-104	chr10	99400195	99400321	+	9.6	0.746	48	50	6.5	7.69	2.55e-27	15.49	3.93e-41
chr10-83	chr10	123900456	123900582	+	9.6	0.556	52	51	4.6	10.98	7.04e-35	6.98	1.7e-25
chr11-135	chr11	1569719	1569845	+	9.6	0.828	46	50	3.7	13.46	2.74e-38	10.8	6.76e-34
chr11-93	chr11	3443918	3444044	+	9.6	0.755	51	50	2.8	17.94	3.86e-44	14.61	5.93e-40
chr11-105	chr11	7678671	7678797	+	9.6	0.756	49	50	6.5	7.69	2.55e-27	16.83	7.96e-43
chr11-94	chr11	12014048	12014174	+	9.6	0.743	51	50	5.6	8.97	2.84e-30	9.69	8.87e-32
chr11-83	chr11	20057306	20057432	+	9.6	0.641	53	50	7.4	6.73	8.15e-25	8.02	1.36e-27
chr11-124	chr11	64024765	64024891	+	9.6	0.765	48	50	6.5	7.69	2.55e-27	7.64	3.44e-27
chr11-100	chr11	66651191	66651317	+	9.6	0.687	50	50	1.9	26.91	1.5e-52	6.28	4.3e-23
chr11-110	chr11	69794733	69794859	+	9.6	0.797	49	51	4.6	10.98	7.04e-35	8.66	1.38e-29
chr11-114	chr11	86344070	86344196	+	9.6	0.725	49	50	5.6	8.97	2.84e-30	12.3	1.74e-36
chr11-102	chr11	93865501	93865627	+	9.6	0.827	50	50	6.5	7.69	2.55e-27	6.94	2.15e-25
chr12-102	chr12	96613539	96613665	+	9.6	0.75	46	50	12.1	4.14	3.06e-16	6.8	5.33e-25
chr12-69	chr12	104359492	104359618	+	9.6	0.765	52	50	5.6	8.97	2.84e-30	13.4	3.29e-38
chr12-76	chr12	105804084	105804210	+	9.6	0.631	50	50	8.4	5.98	1.19e-22	6.22	6.03e-23
chr12-71	chr12	109005882	109006008	+	9.6	0.685	51	50	4.6	10.77	7.74e-34	7.31	2.35e-26
chr14-76	chr14	68604564	68604690	+	9.6	0.713	49	50	5.6	8.97	2.84e-30	10.02	2.01e-32
chr14-62	chr14	74317781	74317907	+	9.6	0.747	52	53	7.4	7.13	2.36e-27	9.28	6.35e-31
chr15-14	chr15	74913518	74913644	+	9.6	0.693	50	50	5.6	8.97	2.84e-30	12.42	1.12e-36
chr16-47	chr16	48192355	48192481	+	9.6	0.692	51	51	2.8	18.3	2.11e-45	13.64	1.47e-38
chr17-130	chr17	4581950	4582076	+	9.6	0.744	48	50	7.4	6.73	8.15e-25	7.68	8.73e-27
chr17-97	chr17	18759523	18759649	+	9.6	0.813	53	50	1.9	26.91	1.5e-52	13.59	1.73e-38
chr17-121	chr17	27253171	27253297	+	9.6	0.75	49	50	6.5	7.69	2.55e-27	10.31	5.48e-33
chr17-113	chr17	27472475	27472601	+	9.6	0.725	50	50	7.4	6.73	8.15e-25	8.51	3.02e-29
chr17-135	chr17	28804377	28804503	+	9.6	0.729	48	50	4.6	10.77	7.74e-34	13	1.35e-37
chr17-110	chr17	48140047	48140173	+	9.6	0.716	51	51	5.6	9.15	3.1e-31	5.84	3.29e-22
chr17-117	chr17	77702443	77702569	+	9.6	0.733	50	50	4.6	10.77	7.74e-34	11.74	1.46e-35
chr18-36	chr18	8947687	8947813	+	9.6	0.68	51	51	4.6	10.98	7.04e-35	7.87	9.31e-28
chr18-37	chr18	47376288	47376414	+	9.6	0.641	50	50	0.9	53.83	3.26e-67	13	1.35e-37
chr18-39	chr18	68040249	68040375	+	9.6	0.69	50	50	1.9	26.91	1.5e-52	21.77	3.35e-47
chr19-163	chr19	2151755	2151881	+	9.6	0.724	51	50	3.7	13.46	2.74e-38	12.83	2.5e-37
chr19-165	chr19	10981998	10982124	+	9.6	0.703	51	50	6.5	7.69	2.55e-27	6.64	1.39e-24
chr19-175	chr19	12902094	12902220	+	9.6	0.701	50	50	12.1	4.14	3.06e-16	5.12	3.85e-19
chr19-176	chr19	16272057	16272183	+	9.6	0.629	50	50	10.2	4.89	4.41e-19	5.51	3.68e-21
chr19-187	chr19	16582813	16582939	+	9.6	0.613	49	51	7.4	6.86	1.18e-25	6.62	1.61e-24
chr19-167	chr19	18414424	18414550	+	9.6	0.673	51	50	2.8	17.94	3.86e-44	5.64	1.35e-21
chr19-169	chr19	36139132	36139258	+	9.6	0.805	51	50	1.9	26.91	1.5e-52	10.37	4.31e-33
chr19-193	chr19	37663570	37663696	+	9.6	0.711	49	50	2.8	17.94	3.86e-44	16.06	7.09e-42
chr19-150	chr19	37861777	37861903	+	9.6	0.614	53	50	2.8	17.94	3.86e-44	12.7	3.95e-37
chr19-170	chr19	39616306	39616432	+	9.6	0.798	51	50	5.6	8.97	2.84e-30	9.99	2.26e-32
chr19-211	chr19	46366517	46366643	+	9.6	0.744	48	50	12.1	4.14	3.06e-16	9.43	2.99e-31
chr19-181	chr19	47033386	47033512	+	9.6	0.71	50	50	9.3	5.38	9.31e-21	10.23	7.85e-33
chr19-153	chr19	48707101	48707227	+	9.6	0.783	53	50	12.1	4.14	3.06e-16	13.59	1.73e-38
chr19-162	chr19	51866303	51866429	+	9.6	0.767	52	50	3.7	13.46	2.74e-38	7.79	1.45e-27
chr20-84	chr20	10492226	10492352	+	9.6	0.753	51	50	5.6	8.97	2.84e-30	12.7	3.95e-37
chr20-90	chr20	36619199	36619325	+	9.6	0.688	50	50	7.4	6.73	8.15e-25	5.13	6.34e-20
chr20-115	chr20	42712022	42712148	+	9.6	0.766	46	50	7.4	6.73	8.15e-25	9.82	5.04e-32
chr20-98	chr20	49254997	49255123	+	9.6	0.707	49	50	4.6	10.77	7.74e-34	9.19	9.72e-31
chrX-22	chrX	13129024	13129150	+	9.6	0.73	54	51	2.8	18.3	2.11e-45	17.91	4.17e-44
chr1-210	chr1	8257997	8258123	+	9.41	0.573	48	50	5.6	8.97	2.84e-30	7.12	2.18e-25
chr1-173	chr1	22345662	22345788	+	9.41	0.691	51	50	3.7	13.46	2.74e-38	9.16	4.31e-30
chr1-198	chr1	23854802	23854928	+	9.41	0.679	49	50	6.5	7.69	2.55e-27	9.07	6.56e-30
chr1-199	chr1	27438491	27438617	+	9.41	0.8	49	49	3.7	13.19	3.7e-37	8.76	3.03e-29
chr1-221	chr1	27626075	27626201	+	9.41	0.659	47	49	4.6	10.55	8.35e-33	7.73	6.74e-27
chr1-185	chr1	35513076	35513202	+	9.41	0.725	50	49	2.8	17.58	6.93e-43	14.88	1.5e-39
chr1-213	chr1	41870002	41870128	+	9.41	0.67	48	49	3.7	13.19	3.7e-37	10.82	2.69e-33
chr1-134	chr1	59398644	59398770	+	9.41	0.638	56	49	6.5	7.54	1.96e-26	8.98	9.92e-30
chr1-186	chr1	68189496	68189622	+	9.41	0.707	50	49	0.5	105.5	4.95e-80	11.24	5.01e-34
chr1-157	chr1	86010526	86010652	+	9.41	0.609	53	49	5.6	8.79	2.55e-29	9.72	3.17e-31
chr1-214	chr1	92270238	92270364	+	9.41	0.636	48	49	4.6	10.55	8.35e-33	7.26	2.97e-25
chr1-215	chr1	113058444	113058570	+	9.41	0.803	48	49	0.9	52.75	1.75e-65	10.47	1.19e-32
chr1-192	chr1	180120691	180120817	+	9.41	0.678	50	49	2.8	17.58	6.93e-43	7.4	1.31e-25
chr1-205	chr1	183573495	183573621	+	9.41	0.75	49	49	6.5	7.54	1.96e-26	10.47	1.19e-32
chr1-238	chr1	222000278	222000404	+	9.41	0.788	47	49	6.5	7.54	1.96e-26	10.19	3.98e-32
chr1-182	chr1	236047054	236047180	+	9.41	0.638	51	49	6.5	7.54	1.96e-26	7.5	2.42e-26
chr1-183	chr1	236666502	236666628	+	9.41	0.69	51	49	1.9	26.37	4.05e-51	13.85	3.95e-38
chr2-116	chr2	27233700	27233826	+	9.41	0.9	53	49	3.7	13.19	3.7e-37	11.88	1.95e-34
chr2-160	chr2	68098925	68099051	+	9.41	0.736	47	49	1.9	26.37	4.05e-51	12.09	1.86e-35
chr2-153	chr2	86332612	86332738	+	9.41	0.711	48	49	3.7	13.19	3.7e-37	8.76	3.03e-29
chr2-121	chr2	100907728	100907854	+	9.41	0.652	53	49	6.5	7.54	1.96e-26	7.94	2.14e-27
chr3-54	chr3	15244345	15244471	+	9.41	0.797	50	49	4.6	10.55	8.35e-33	9.6	5.54e-31
chr3-55	chr3	49711272	49711398	+	9.41	0.753	50	49	2.8	17.58	6.93e-43	9.25	2.83e-30
chr3-56	chr3	87360557	87360683	+	9.41	0.756	50	49	3.7	13.19	3.7e-37	14.54	4.34e-39
chr4-63	chr4	4661805	4661931	+	9.41	0.743	47	49	5.6	8.79	2.55e-29	12.29	9.02e-36
chr4-56	chr4	71387642	71387768	+	9.41	0.78	50	49	6.5	7.54	1.96e-26	13.95	2.84e-38
chr4-50	chr4	76598578	76598704	+	9.41	0.639	53	49	2.8	17.58	6.93e-43	10.38	1.72e-32
chr5-78	chr5	34915649	34915775	+	9.41	0.75	48	49	11.1	4.4	6.23e-17	20.05	1.56e-45
chr5-80	chr5	106878733	106878859	+	9.41	0.819	48	49	9.3	5.27	5.03e-20	15.36	2.16e-39
chr5-74	chr5	132010429	132010555	+	9.41	0.738	49	49	4.6	10.55	8.35e-33	9.4	5.33e-30
chr5-63	chr5	145234366	145234492	+	9.41	0.714	51	49	0.5	105.5	4.95e-80	12	1.28e-34
chr5-75	chr5	172285851	172285977	+	9.41	0.718	49	49	2.8	17.58	6.93e-43	7.79	1.56e-26
chr6-262	chr6	4352179	4352305	+	9.41	0.714	49	50	9.3	5.38	9.31e-21	6.95	1.82e-24
chr6-229	chr6	5435698	5435824	+	9.41	0.636	51	49	4.6	10.55	8.35e-33	10.02	8.04e-32
chr6-265	chr6	6879809	6879935	+	9.41	0.64	49	49	8.4	5.86	7.13e-22	7.92	2.34e-27
chr6-231	chr6	21733047	21733173	+	9.41	0.833	51	49	6.5	7.54	1.96e-26	9.31	2.05e-30
chr6-232	chr6	26473953	26474079	+	9.41	0.706	51	49	2.8	17.58	6.93e-43	8.5	1.09e-28
chr6-218	chr6	30910603	30910729	+	9.41	0.657	52	49	9.3	5.27	5.03e-20	5.97	8.78e-22
chr6-301	chr6	31795113	31795239	+	9.41	0.638	47	49	11.1	4.4	6.23e-17	6.67	3.38e-24
chr6-273	chr6	31939706	31939832	+	9.41	0.671	49	49	2.8	17.58	6.93e-43	4.61	1.04e-17
chr6-256	chr6	32049009	32049135	+	9.41	0.687	50	49	5.6	8.79	2.55e-29	4.44	4.26e-17
chr6-275	chr6	33218154	33218280	+	9.41	0.69	49	49	4.6	10.55	8.35e-33	5.22	7.74e-20
chr6-237	chr6	36593019	36593145	+	9.41	0.653	51	49	7.4	6.59	5.5e-24	4.18	4.31e-16
chr6-240	chr6	42106275	42106401	+	9.41	0.706	51	49	8.4	5.86	7.13e-22	4.2	3.36e-16
chr6-259	chr6	42255609	42255735	+	9.41	0.612	50	49	2.8	17.58	6.93e-43	6.1	1.34e-22
chr6-316	chr6	44095108	44095234	+	9.41	0.822	47	49	8.4	5.86	7.13e-22	6.58	6.04e-24
chr6-242	chr6	52020919	52021045	+	9.41	0.595	51	49	5.6	8.79	2.55e-29	7.15	1.86e-25
chr7-38	chr7	116271012	116271138	+	9.41	0.866	51	49	2.8	17.58	6.93e-43	27.21	9.3e-52
chr7-44	chr7	138437402	138437528	+	9.41	0.75	49	49	7.4	6.59	5.5e-24	15	1.05e-39
chr8-86	chr8	28258648	28258774	+	9.41	0.696	48	49	1.9	26.37	4.05e-51	13.27	2.76e-37
chr8-75	chr8	126614988	126615114	+	9.41	0.679	50	50	2.8	17.94	3.86e-44	6.39	5.65e-23
chr8-82	chr8	128307015	128307141	+	9.41	0.833	49	49	3.7	13.19	3.7e-37	10.19	3.98e-32
chr8-64	chr8	130704654	130704780	+	9.41	0.742	52	53	11.1	4.75	1.34e-19	7.08	2.76e-25
chr8-68	chr8	141474374	141474500	+	9.41	0.733	51	49	11.1	4.4	6.23e-17	6.11	1.26e-22
chr8-69	chr8	142238104	142238230	+	9.41	0.791	51	49	4.6	10.55	8.35e-33	8	1.49e-27
chr9-58	chr9	103174010	103174136	+	9.41	0.803	50	49	3.7	13.19	3.7e-37	13.37	2.01e-37
chr9-72	chr9	130795515	130795641	+	9.41	0.855	47	49	3.7	13.19	3.7e-37	13.37	2.01e-37
chr10-99	chr10	25782121	25782247	+	9.41	0.753	48	49	3.7	13.19	3.7e-37	15.81	9.43e-41
chr10-85	chr10	44349714	44349840	+	9.41	0.738	51	49	0.5	105.5	4.95e-80	9.41	1.33e-30
chr10-93	chr10	54577779	54577905	+	9.41	0.763	50	50	2.8	17.94	3.86e-44	15.3	4.22e-40
chr10-96	chr10	76586077	76586203	+	9.41	0.649	49	49	6.5	7.54	1.96e-26	7.03	3.78e-25
chr10-97	chr10	99161060	99161186	+	9.41	0.673	49	49	6.5	7.54	1.96e-26	9.92	1.28e-31
chr10-103	chr10	99302994	99303120	+	9.41	0.833	48	49	2.8	17.58	6.93e-43	10.25	1.25e-31
chr10-106	chr10	116180708	116180834	+	9.41	0.708	48	49	4.6	10.55	8.35e-33	13.09	5.17e-37
chr11-119	chr11	1149056	1149182	+	9.41	0.686	48	49	2.8	17.58	6.93e-43	4.38	7.24e-17
chr11-104	chr11	6271191	6271317	+	9.41	0.763	49	49	3.7	13.19	3.7e-37	12.53	3.73e-36
chr11-106	chr11	30344497	30344623	+	9.41	0.747	49	50	3.7	13.46	2.74e-38	14.94	1.26e-39
chr11-107	chr11	46722136	46722262	+	9.41	0.681	49	51	4.6	10.98	7.04e-35	8.84	7.3e-29
chr11-122	chr11	57192497	57192623	+	9.41	0.578	48	49	0.5	105.5	4.95e-80	6.33	3.05e-23
chr11-103	chr11	124940694	124940820	+	9.41	0.587	50	51	4.6	10.98	7.04e-35	7.41	3.99e-26
chr12-123	chr12	94376910	94377036	+	9.41	0.747	43	49	3.7	13.19	3.7e-37	10.91	1.84e-33
chr12-93	chr12	111183592	111183718	+	9.41	0.759	47	49	3.7	13.19	3.7e-37	7.7	8.01e-27
chr12-72	chr12	113658995	113659121	+	9.41	0.644	51	49	12.1	4.06	1.27e-15	7.7	8.01e-27
chr14-75	chr14	55878610	55878736	+	9.41	0.646	49	49	8.4	5.86	7.13e-22	7.29	2.53e-25
chr14-80	chr14	58765033	58765159	+	9.41	0.704	48	49	7.4	6.59	5.5e-24	10.32	2.19e-32
chr14-77	chr14	74190829	74190955	+	9.41	0.67	49	49	5.6	8.79	2.55e-29	9.52	7.72e-31
chr14-103	chr14	104188236	104188362	+	9.41	0.629	46	50	6.5	7.69	2.55e-27	8.74	3.35e-29
chr15-9	chr15	57902489	57902615	+	9.41	0.671	51	50	0.9	53.83	3.26e-67	15.55	2.01e-40
chr15-15	chr15	70006726	70006852	+	9.41	0.663	48	49	5.6	8.79	2.55e-29	10.73	3.92e-33
chr16-49	chr16	67575563	67575689	+	9.41	0.687	50	49	5.6	8.79	2.55e-29	7.04	3.5e-25
chr16-46	chr16	85038241	85038367	+	9.41	0.674	52	49	4.6	10.55	8.35e-33	9.95	4.56e-31
chr17-119	chr17	8059959	8060085	+	9.41	0.566	49	49	7.4	6.59	5.5e-24	5.87	6.72e-22
chr17-112	chr17	26662651	26662777	+	9.41	0.788	50	49	5.6	8.79	2.55e-29	8.48	1.2e-28
chr17-115	chr17	41534302	41534428	+	9.41	0.741	50	49	5.6	8.79	2.55e-29	13.05	6.03e-37
chr17-144	chr17	42264096	42264222	+	9.41	0.61	47	49	6.5	7.54	1.96e-26	11.14	3.35e-33
chr17-139	chr17	56612932	56613058	+	9.41	0.753	48	49	3.7	13.19	3.7e-37	10.27	2.78e-32
chr17-100	chr17	74443174	74443300	+	9.41	0.674	53	49	9.3	5.27	5.03e-20	8.6	6.69e-29
chr17-126	chr17	75136709	75136835	+	9.41	0.824	49	49	5.6	8.79	2.55e-29	9.67	6.36e-30
chr17-128	chr17	80241348	80241474	+	9.41	0.734	49	49	3.7	13.19	3.7e-37	7.45	1.02e-25
chr19-200	chr19	5962170	5962296	+	9.41	0.711	48	49	0.9	52.75	1.75e-65	11.4	2.58e-34
chr19-185	chr19	6373313	6373439	+	9.41	0.738	49	49	5.6	8.79	2.55e-29	7.11	2.36e-25
chr19-174	chr19	8063106	8063232	+	9.41	0.716	50	49	10.2	4.8	2.17e-18	6.62	4.52e-24
chr19-164	chr19	10426629	10426755	+	9.41	0.859	51	50	12.1	4.14	3.06e-16	10.3	2.47e-32
chr19-179	chr19	17889105	17889231	+	9.41	0.736	50	49	9.3	5.27	5.03e-20	5.68	2.61e-21
chr19-191	chr19	18385208	18385334	+	9.41	0.797	49	49	5.6	8.79	2.55e-29	6.21	6.45e-23
chr19-180	chr19	45349503	45349629	+	9.41	0.759	50	49	6.5	7.54	1.96e-26	10.3	2.47e-32
chr19-209	chr19	46000455	46000581	+	9.41	0.771	48	49	7.4	6.59	5.5e-24	8.6	8.7e-28
chr19-210	chr19	46220643	46220769	+	9.41	0.58	48	49	7.4	6.59	5.5e-24	7.23	1.15e-25
chr19-196	chr19	49122433	49122559	+	9.41	0.718	49	49	10.2	4.8	2.17e-18	11.72	7.56e-35
chr19-161	chr19	49553773	49553899	+	9.41	0.747	52	49	3.7	13.19	3.7e-37	18.95	2.14e-44
chr19-171	chr19	51611836	51611962	+	9.41	0.706	51	49	4.6	10.55	8.35e-33	10.55	8.27e-33
chr19-197	chr19	54024160	54024286	+	9.41	0.8	49	49	11.1	4.4	6.23e-17	17.47	9.24e-43
chr20-80	chr20	13765523	13765649	+	9.41	0.836	52	49	4.6	10.55	8.35e-33	13.23	1.68e-36
chr20-103	chr20	47663246	47663372	+	9.41	0.654	48	49	9.3	5.27	5.03e-20	6.84	1.19e-24
chr20-97	chr20	48900945	48901071	+	9.41	0.679	49	49	6.5	7.54	1.96e-26	6.15	9.64e-23
chr20-99	chr20	52499786	52499912	+	9.41	0.726	49	49	4.6	10.55	8.35e-33	10.7	4.45e-33
chr1-218	chr1	1280301	1280427	+	9.22	0.706	47	48	7.4	6.46	3.64e-23	9.04	2.91e-29
chr1-223	chr1	42317404	42317530	+	9.22	0.674	47	48	8.4	5.74	4.2e-21	7.3	2.33e-25
chr1-188	chr1	113247715	113247841	+	9.22	0.611	50	48	5.6	8.61	2.25e-28	6.77	1.59e-23
chr1-168	chr1	167905290	167905416	+	9.22	0.767	52	48	8.4	5.74	4.2e-21	12.26	2.43e-34
chr1-250	chr1	172224213	172224339	+	9.22	0.765	46	48	6.5	7.38	1.48e-25	16.08	2.69e-40
chr1-194	chr1	206848256	206848382	+	9.22	0.747	50	49	3.7	13.19	3.7e-37	9.54	2.77e-30
chr1-207	chr1	207494885	207495011	+	9.22	0.625	49	48	9.3	5.17	2.67e-19	10.66	2.27e-32
chr1-269	chr1	211786770	211786896	+	9.22	0.773	45	49	9.3	5.27	5.03e-20	7.77	1.7e-26
chr1-208	chr1	222019359	222019485	+	9.22	0.753	49	48	4.6	10.33	8.83e-32	13.37	1.04e-36
chr1-209	chr1	235324508	235324634	+	9.22	0.776	49	49	6.5	7.54	1.96e-26	13.42	8.89e-37
chr2-140	chr2	28837158	28837284	+	9.22	0.709	49	48	8.4	5.74	4.2e-21	7.89	9.19e-27
chr2-159	chr2	30887881	30888007	+	9.22	0.667	47	48	9.3	5.17	2.67e-19	9.54	1.11e-29
chr2-139	chr2	100290590	100290716	+	9.22	0.67	50	48	8.4	5.74	4.2e-21	8.01	4.91e-27
chr2-142	chr2	118845926	118846052	+	9.22	0.792	49	48	0.5	103.34	5.23e-78	17.85	2.39e-42
chr2-167	chr2	242530021	242530147	+	9.22	0.534	47	48	8.4	5.74	4.2e-21	9.04	2.91e-29
chr3-79	chr3	38206854	38206980	+	9.22	0.753	46	49	3.7	13.19	3.7e-37	12.82	3.52e-35
chr3-67	chr3	111570680	111570806	+	9.22	0.67	48	48	0.9	51.67	9.24e-64	17.44	6.99e-42
chr4-55	chr4	1582940	1583066	+	9.22	0.849	50	48	2.8	17.22	1.22e-41	10.82	1.21e-32
chr4-71	chr4	54958026	54958152	+	9.22	0.674	46	48	3.7	12.92	4.88e-36	10.12	9.06e-31
chr4-59	chr4	167064502	167064628	+	9.22	0.774	49	48	5.6	8.61	2.25e-28	19.33	6.4e-44
chr5-79	chr5	34929384	34929510	+	9.22	0.681	48	50	5.6	8.97	2.84e-30	12.32	4.05e-35
chr5-68	chr5	52323982	52324108	+	9.22	0.67	50	48	4.6	10.33	8.83e-32	8.84	7.3e-29
chr5-108	chr5	133845120	133845246	+	9.22	0.694	45	49	6.5	7.54	1.96e-26	5.91	1.29e-21
chr5-82	chr5	135394409	135394535	+	9.22	0.682	48	48	0.9	51.67	9.24e-64	9.19	1.4e-29
chr5-83	chr5	136556325	136556451	+	9.22	0.845	48	48	1.9	25.84	1.07e-49	14	7.63e-37
chr5-84	chr5	137514244	137514370	+	9.22	0.74	48	48	5.6	8.61	2.25e-28	10.14	2.01e-31
chr5-112	chr5	180668651	180668777	+	9.22	0.688	45	48	4.6	10.33	8.83e-32	9.52	1.24e-29
chr6-263	chr6	4581825	4581951	+	9.22	0.716	49	49	8.4	5.86	7.13e-22	8.84	7.3e-29
chr6-266	chr6	11012205	11012331	+	9.22	0.604	49	49	2.8	17.58	6.93e-43	9.08	2.36e-29
chr6-286	chr6	13307785	13307911	+	9.22	0.75	48	48	4.6	10.33	8.83e-32	7.6	1.45e-25
chr6-288	chr6	19465611	19465737	+	9.22	0.714	48	48	10.2	4.7	1.05e-17	9.24	1.13e-29
chr6-289	chr6	26285694	26285820	+	9.22	0.709	48	48	9.3	5.17	2.67e-19	8.95	4.39e-29
chr6-251	chr6	29617910	29618036	+	9.22	0.684	50	48	9.3	5.17	2.67e-19	8.5	3.93e-28
chr6-271	chr6	30737813	30737939	+	9.22	0.637	49	48	5.6	8.61	2.25e-28	4.85	6.72e-18
chr6-233	chr6	30749385	30749511	+	9.22	0.612	51	49	3.7	13.19	3.7e-37	5.54	1.68e-20
chr6-255	chr6	31940962	31941088	+	9.22	0.624	50	48	0.5	103.34	5.23e-78	4.66	1.43e-17
chr6-302	chr6	32121709	32121835	+	9.22	0.606	47	48	8.4	5.74	4.2e-21	6.76	5.65e-24
chr6-257	chr6	33567553	33567679	+	9.22	0.734	50	48	10.2	4.7	1.05e-17	6.35	7.46e-23
chr6-312	chr6	37322111	37322237	+	9.22	0.562	47	49	6.5	7.54	1.96e-26	4.94	1.57e-18
chr6-291	chr6	41040073	41040199	+	9.22	0.714	48	48	10.2	4.7	1.05e-17	5.01	1.98e-18
chr6-343	chr6	74414643	74414769	+	9.22	0.65	46	48	6.5	7.38	1.48e-25	9.74	1.13e-30
chr6-320	chr6	169572647	169572773	+	9.22	0.707	47	48	3.7	12.92	4.88e-36	9.62	1.99e-30
chr7-52	chr7	123410640	123410766	+	9.22	0.732	47	49	0.5	105.5	4.95e-80	15.61	1.03e-39
chr7-53	chr7	155128159	155128285	+	9.22	0.612	47	49	7.4	6.59	5.5e-24	5.13	3.46e-19
chr8-81	chr8	126483637	126483763	+	9.22	0.684	49	48	3.7	12.92	4.88e-36	7.57	5.22e-26
chr8-108	chr8	141555216	141555342	+	9.22	0.69	46	48	3.7	12.92	4.88e-36	7.28	8.28e-25
chr8-85	chr8	145016810	145016936	+	9.22	0.699	49	48	5.6	8.61	2.25e-28	5.09	1.11e-18
chr8-76	chr8	146073986	146074112	+	9.22	0.678	50	48	7.4	6.46	3.64e-23	6.19	2.07e-22
chr9-56	chr9	34652048	34652174	+	9.22	0.636	50	49	7.4	6.59	5.5e-24	7.48	8.65e-26
chr9-43	chr9	84174802	84174928	+	9.22	0.663	54	48	7.4	6.46	3.64e-23	8.8	8.94e-29
chr9-61	chr9	132672917	132673043	+	9.22	0.74	49	48	5.6	8.61	2.25e-28	10.06	2.86e-31
chr10-90	chr10	14227553	14227679	+	9.22	0.577	50	48	2.8	17.22	1.22e-41	9.49	3.45e-30
chr10-105	chr10	104614263	104614389	+	9.22	0.833	48	48	6.5	7.38	1.48e-25	13.92	1.74e-37
chr10-132	chr10	116173306	116173432	+	9.22	0.625	45	48	1.9	25.84	1.07e-49	9.93	8.19e-30
chr10-94	chr10	127575718	127575844	+	9.22	0.595	50	48	5.6	8.61	2.25e-28	4.3	2.93e-16
chr10-112	chr10	135072813	135072939	+	9.22	0.697	47	48	2.8	17.22	1.22e-41	6.86	3.1e-24
chr11-89	chr11	10582610	10582736	+	9.22	0.744	52	48	0.9	51.67	9.24e-64	15.17	3.76e-39
chr11-123	chr11	62359008	62359134	+	9.22	0.671	48	48	4.6	10.33	8.83e-32	9.49	3.45e-30
chr11-111	chr11	71073666	71073792	+	9.22	0.571	49	48	0.9	51.67	9.24e-64	5.96	6.46e-21
chr11-112	chr11	73490593	73490719	+	9.22	0.831	49	48	8.4	5.74	4.2e-21	11.31	1.74e-33
chr11-145	chr11	76903168	76903294	+	9.22	0.797	46	49	0.5	105.5	4.95e-80	9.1	2.13e-29
chr11-113	chr11	86195475	86195601	+	9.22	0.546	49	48	4.6	10.33	8.83e-32	9.77	1.01e-30
chr11-132	chr11	104540062	104540188	+	9.22	0.712	47	48	3.7	12.92	4.88e-36	11.7	3.92e-34
chr11-116	chr11	128212873	128212999	+	9.22	0.646	49	48	5.6	8.61	2.25e-28	10.11	2.27e-31
chr12-88	chr12	6641890	6642016	+	9.22	0.767	47	48	2.8	17.22	1.22e-41	9.62	1.99e-30
chr12-66	chr12	89554664	89554790	+	9.22	0.674	53	48	4.6	10.33	8.83e-32	7.86	1.1e-26
chr12-81	chr12	89630877	89631003	+	9.22	0.667	49	48	5.6	8.61	2.25e-28	6.69	8.81e-24
chr12-87	chr12	122277474	122277600	+	9.22	0.617	48	48	8.4	5.74	4.2e-21	8.13	2.59e-27
chr14-69	chr14	23564504	23564630	+	9.22	0.697	50	48	1.9	25.84	1.07e-49	8.01	4.91e-27
chr14-66	chr14	59828086	59828212	+	9.22	0.687	51	48	8.4	5.74	4.2e-21	7.77	1.7e-26
chr14-81	chr14	73413324	73413450	+	9.22	0.694	48	49	3.7	13.19	3.7e-37	8.01	4.91e-27
chr14-78	chr14	104387861	104387987	+	9.22	0.8	49	49	3.7	13.19	3.7e-37	12.74	9.18e-36
chr16-52	chr16	57411970	57412096	+	9.22	0.693	48	49	3.7	13.19	3.7e-37	12.04	1.11e-34
chr16-50	chr16	89647847	89647973	+	9.22	0.648	49	48	7.4	6.46	3.64e-23	10.75	1.56e-32
chr17-118	chr17	6452046	6452172	+	9.22	0.643	49	48	8.4	5.74	4.2e-21	7.03	3.46e-24
chr17-104	chr17	25800727	25800853	+	9.22	0.781	51	48	6.5	7.38	1.48e-25	9.67	6.36e-30
chr17-134	chr17	27055725	27055851	+	9.22	0.753	48	48	3.7	12.92	4.88e-36	6.74	6.56e-24
chr17-105	chr17	29764456	29764582	+	9.22	0.785	51	48	4.6	10.33	8.83e-32	10.63	2.58e-32
chr17-122	chr17	38136980	38137106	+	9.22	0.648	49	48	6.5	7.38	1.48e-25	11.48	8.88e-34
chr17-123	chr17	38256893	38257019	+	9.22	0.63	49	48	2.8	17.22	1.22e-41	4.91	9.97e-18
chr17-155	chr17	53025805	53025931	+	9.22	0.75	46	48	5.6	8.61	2.25e-28	10.55	6.72e-31
chr17-252	chr17	73779565	73779691	+	9.22	0.781	40	48	0.9	51.67	9.24e-64	10.25	1.25e-31
chr17-129	chr17	80245953	80246079	+	9.22	0.756	49	48	8.4	5.74	4.2e-21	6.49	3e-23
chr18-41	chr18	20981522	20981648	+	9.22	0.734	49	48	7.4	6.46	3.64e-23	8.88	5.96e-29
chr19-202	chr19	10946863	10946989	+	9.22	0.593	48	48	8.4	5.74	4.2e-21	6.12	3.3e-22
chr19-216	chr19	16189389	16189515	+	9.22	0.731	47	49	8.4	5.86	7.13e-22	5.92	1.21e-21
chr19-204	chr19	16796155	16796281	+	9.22	0.675	48	48	4.6	10.33	8.83e-32	6.81	4.19e-24
chr19-178	chr19	17031722	17031848	+	9.22	0.696	50	48	7.4	6.46	3.64e-23	5.6	1.11e-20
chr19-188	chr19	17331058	17331184	+	9.22	0.693	49	48	6.5	7.38	1.48e-25	6.88	2.66e-24
chr19-190	chr19	17619035	17619161	+	9.22	0.621	49	48	9.3	5.17	2.67e-19	6.03	5.96e-22
chr19-234	chr19	17671273	17671399	+	9.22	0.731	46	48	5.6	8.61	2.25e-28	6.49	3e-23
chr19-205	chr19	17905829	17905955	+	9.22	0.75	48	48	11.1	4.31	2.76e-16	5.29	1.1e-19
chr19-219	chr19	18059104	18059230	+	9.22	0.757	47	48	8.4	5.74	4.2e-21	6.25	1.38e-22
chr19-222	chr19	35632049	35632175	+	9.22	0.77	47	48	3.7	12.92	4.88e-36	10.34	8.75e-32
chr19-258	chr19	45601688	45601814	+	9.22	0.725	45	48	4.6	10.33	8.83e-32	6.8	4.52e-24
chr19-182	chr19	49955154	49955280	+	9.22	0.744	50	48	7.4	6.46	3.64e-23	8.02	4.48e-27
chr19-212	chr19	54693910	54694036	+	9.22	0.62	48	48	10.2	4.7	1.05e-17	6.94	1.96e-24
chr19-172	chr19	57049753	57049879	+	9.22	0.683	51	48	5.6	8.61	2.25e-28	12.87	5.81e-36
chr19-184	chr19	58912739	58912865	+	9.22	0.765	50	48	8.4	5.74	4.2e-21	8.38	2.52e-27
chr20-87	chr20	10742548	10742674	+	9.22	0.639	50	49	1.9	26.37	4.05e-51	8.22	1.63e-27
chr20-105	chr20	11881890	11882016	+	9.22	0.811	47	48	3.7	12.92	4.88e-36	13.09	2.69e-36
chr20-76	chr20	30105342	30105468	+	9.22	0.788	53	48	4.6	10.33	8.83e-32	6.95	1.82e-24
chr20-108	chr20	37736561	37736687	+	9.22	0.727	47	49	3.7	13.19	3.7e-37	6.88	2.66e-24
chr20-110	chr20	42578769	42578895	+	9.22	0.528	47	48	6.5	7.38	1.48e-25	5.69	6.07e-21
chr20-91	chr20	43987863	43987989	+	9.22	0.716	50	48	4.6	10.33	8.83e-32	8.35	8.45e-28
chr20-92	chr20	44713940	44714066	+	9.22	0.814	50	49	7.4	6.59	5.5e-24	12.12	8.35e-35
chr20-95	chr20	47549666	47549792	+	9.22	0.593	49	48	3.7	12.92	4.88e-36	5.97	8.78e-22
chr20-100	chr20	56229551	56229677	+	9.22	0.757	49	48	10.2	4.7	1.05e-17	8.35	8.45e-28
chr20-111	chr20	62313962	62314088	+	9.22	0.702	47	48	9.3	5.17	2.67e-19	7.32	2.15e-25
chr22-6	chr22	17048514	17048640	+	9.22	0.766	49	49	6.5	7.54	1.96e-26	10.48	4.77e-32
chr1-195	chr1	1051423	1051549	+	9.02	0.778	49	47	5.6	8.43	1.94e-27	11.92	3.97e-33
chr1-196	chr1	6403638	6403764	+	9.02	0.733	49	47	2.8	16.87	2.1e-40	9.34	2.65e-29
chr1-212	chr1	20042133	20042259	+	9.02	0.772	48	47	5.6	8.43	1.94e-27	16.24	1.12e-39
chr1-240	chr1	39598688	39598814	+	9.02	0.667	46	47	0.9	50.6	4.78e-62	12.82	3.52e-35
chr1-260	chr1	41980893	41981019	+	9.02	0.727	45	47	11.1	4.22	1.19e-15	7.28	2.51e-24
chr1-224	chr1	42805852	42805978	+	9.02	0.708	47	47	3.7	12.65	6.32e-35	7.89	3.02e-26
chr1-202	chr1	86072832	86072958	+	9.02	0.711	49	48	4.6	10.33	8.83e-32	8.7	5.31e-28
chr1-282	chr1	109969034	109969160	+	9.02	0.711	44	47	6.5	7.23	1.1e-24	14.16	4.6e-37
chr1-244	chr1	116325696	116325822	+	9.02	0.704	46	48	7.4	6.46	3.64e-23	17.23	8.05e-41
chr1-246	chr1	153538956	153539082	+	9.02	0.602	46	47	9.3	5.06	1.38e-18	7	4.04e-24
chr1-190	chr1	161509822	161509948	+	9.02	0.667	50	47	3.7	12.65	6.32e-35	12.19	7.6e-33
chr1-271	chr1	225648488	225648614	+	9.02	0.722	45	47	1.9	25.3	2.76e-48	8.25	4.87e-27
chr2-157	chr2	10592648	10592774	+	9.02	0.643	47	47	4.6	10.12	9.14e-31	10.35	3.49e-31
chr2-144	chr2	10633842	10633968	+	9.02	0.713	48	48	3.7	12.92	4.88e-36	10.52	7.6e-31
chr2-168	chr2	73439636	73439762	+	9.02	0.694	46	47	6.5	7.23	1.1e-24	8.4	2.29e-27
chr2-161	chr2	85814808	85814934	+	9.02	0.805	47	47	9.3	5.06	1.38e-18	6.97	4.72e-24
chr2-137	chr2	95944111	95944237	+	9.02	0.701	50	49	5.6	8.79	2.55e-29	7.77	5.6e-26
chr2-163	chr2	112812022	112812148	+	9.02	0.598	47	47	1.9	25.3	2.76e-48	9.52	1.24e-29
chr2-156	chr2	224725824	224725950	+	9.02	0.786	48	48	4.6	10.33	8.83e-32	11.6	2.67e-33
chr2-166	chr2	225450342	225450468	+	9.02	0.659	47	47	2.8	16.87	2.1e-40	15.96	1.5e-38
chr3-78	chr3	14413407	14413533	+	9.02	0.694	46	47	1.9	25.3	2.76e-48	8.15	2.79e-26
chr3-65	chr3	38178624	38178750	+	9.02	0.632	48	47	5.6	8.43	1.94e-27	8.4	2.29e-27
chr3-125	chr3	46249982	46250108	+	9.02	0.792	42	47	6.5	7.23	1.1e-24	8.27	4.44e-27
chr3-72	chr3	98241020	98241146	+	9.02	0.795	47	47	2.8	16.87	2.1e-40	11.88	4.57e-33
chr3-73	chr3	171847929	171848055	+	9.02	0.772	47	47	7.4	6.32	2.36e-22	12.73	4.77e-35
chr3-74	chr3	182088857	182088983	+	9.02	0.753	47	48	4.6	10.33	8.83e-32	12.02	5.76e-34
chr3-75	chr3	185376373	185376499	+	9.02	0.682	47	47	3.7	12.65	6.32e-35	9.04	1.05e-28
chr3-76	chr3	186929760	186929886	+	9.02	0.693	47	47	4.6	10.12	9.14e-31	9.9	2.3e-30
chr4-67	chr4	13561194	13561320	+	9.02	0.833	46	47	2.8	16.87	2.1e-40	16.61	4.15e-40
chr4-58	chr4	17723805	17723931	+	9.02	0.695	49	47	1.9	25.3	2.76e-48	11.21	5.27e-32
chr4-80	chr4	25162259	25162385	+	9.02	0.744	44	47	3.7	12.65	6.32e-35	17.91	1.46e-41
chr4-72	chr4	77468164	77468290	+	9.02	0.691	46	47	3.7	12.65	6.32e-35	8.68	2.11e-27
chr4-83	chr4	99841328	99841454	+	9.02	0.847	44	47	2.8	16.87	2.1e-40	17.91	1.46e-41
chr4-76	chr4	124748166	124748292	+	9.02	0.817	45	47	2.8	16.87	2.1e-40	15.48	9.2e-39
chr5-72	chr5	57185437	57185563	+	9.02	0.6	49	47	2.8	16.87	2.1e-40	9.47	1.54e-29
chr5-69	chr5	64778666	64778792	+	9.02	0.768	50	47	1.9	25.3	2.76e-48	14.66	5.98e-37
chr5-101	chr5	81574426	81574552	+	9.02	0.706	46	47	4.6	10.12	9.14e-31	14.5	1.64e-37
chr5-81	chr5	110848165	110848291	+	9.02	0.707	48	47	3.7	12.65	6.32e-35	11.17	1.33e-32
chr5-93	chr5	138000399	138000525	+	9.02	0.652	47	47	7.4	6.32	2.36e-22	5.97	6.06e-21
chr5-86	chr5	172167945	172168071	+	9.02	0.688	48	47	3.7	12.65	6.32e-35	10.05	2.06e-29
chr6-261	chr6	1725026	1725152	+	9.02	0.711	49	47	6.5	7.23	1.1e-24	12.87	3.02e-35
chr6-295	chr6	7758875	7759001	+	9.02	0.643	47	47	8.4	5.62	2.42e-20	11.49	4.01e-33
chr6-246	chr6	10747669	10747795	+	9.02	0.612	50	48	6.5	7.38	1.48e-25	8.66	6.47e-28
chr6-323	chr6	13574080	13574206	+	9.02	0.74	46	47	5.6	8.43	1.94e-27	8.99	1.85e-27
chr6-287	chr6	18260991	18261117	+	9.02	0.724	48	47	5.6	8.43	1.94e-27	8.68	2.11e-27
chr6-298	chr6	24775078	24775204	+	9.02	0.908	47	47	10.2	4.6	4.94e-17	11.94	7.65e-34
chr6-254	chr6	31782559	31782685	+	9.02	0.682	50	47	6.5	7.23	1.1e-24	7.87	3.3e-26
chr6-280	chr6	38216693	38216819	+	9.02	0.69	49	47	8.4	5.62	2.42e-20	5.15	7.26e-19
chr6-281	chr6	38227724	38227850	+	9.02	0.645	49	47	6.5	7.23	1.1e-24	4.63	4.03e-17
chr6-293	chr6	158489980	158490106	+	9.02	0.81	48	47	5.6	8.43	1.94e-27	8.85	2.63e-28
chr7-42	chr7	12727121	12727247	+	9.02	0.738	49	47	3.7	12.65	6.32e-35	18.27	6.05e-42
chr7-55	chr7	22862400	22862526	+	9.02	0.75	46	47	1.9	25.3	2.76e-48	14.38	2.32e-37
chr7-47	chr7	47514875	47515001	+	9.02	0.709	48	47	5.6	8.43	1.94e-27	10.47	2.15e-31
chr7-109	chr7	62019223	62019349	+	9.02	0.824	38	47	11.1	4.22	1.19e-15	4.94	3.49e-18
chr7-57	chr7	72992893	72993019	+	9.02	0.643	46	47	1.9	25.3	2.76e-48	12.82	3.52e-35
chr7-41	chr7	116152160	116152286	+	9.02	0.72	50	47	1.9	25.3	2.76e-48	20.3	5.5e-44
chr7-48	chr7	142507043	142507169	+	9.02	0.663	48	47	2.8	16.87	2.1e-40	9.18	5.58e-29
chr8-88	chr8	102103137	102103263	+	9.02	0.659	48	47	7.4	6.32	2.36e-22	6.35	1.96e-22
chr8-93	chr8	104033153	104033279	+	9.02	0.795	47	48	5.6	8.61	2.25e-28	8.98	1.43e-28
chr8-94	chr8	104524413	104524539	+	9.02	0.776	47	47	9.3	5.06	1.38e-18	15.22	1.93e-38
chr9-62	chr9	33738172	33738298	+	9.02	0.812	48	47	5.6	8.43	1.94e-27	15.35	1.33e-38
chr9-134	chr9	79481888	79482014	+	9.02	0.675	41	47	7.4	6.32	2.36e-22	19.99	6.67e-42
chr9-65	chr9	131418926	131419052	+	9.02	0.685	48	47	5.6	8.43	1.94e-27	11.14	1.52e-32
chr9-73	chr9	139474367	139474493	+	9.02	0.574	47	47	2.8	16.87	2.1e-40	4.36	3.53e-16
chr10-107	chr10	977628	977754	+	9.02	0.814	47	47	2.8	16.87	2.1e-40	13.14	1.2e-35
chr10-123	chr10	3867633	3867759	+	9.02	0.75	45	47	4.6	10.12	9.14e-31	13.95	9.02e-37
chr10-113	chr10	5626972	5627098	+	9.02	0.655	46	47	2.8	16.87	2.1e-40	8.74	4.35e-28
chr10-108	chr10	13924209	13924335	+	9.02	0.631	47	47	5.6	8.43	1.94e-27	8.17	7.07e-27
chr10-127	chr10	27149813	27149939	+	9.02	0.744	45	47	1.9	25.3	2.76e-48	10.64	4.64e-31
chr10-149	chr10	49705408	49705534	+	9.02	0.814	43	47	6.5	7.23	1.1e-24	13.53	3.35e-36
chr10-101	chr10	65477897	65478023	+	9.02	0.76	48	47	5.6	8.43	1.94e-27	10.29	8.01e-30
chr11-128	chr11	33757934	33758060	+	9.02	0.811	47	47	2.8	16.87	2.1e-40	10.21	6.36e-31
chr11-125	chr11	64546317	64546443	+	9.02	0.643	48	47	5.6	8.43	1.94e-27	10.32	3.94e-31
chr11-109	chr11	67007431	67007557	+	9.02	0.724	49	47	0.9	50.6	4.78e-62	9.09	8.5e-29
chr11-131	chr11	86748796	86748922	+	9.02	0.624	47	47	2.8	16.87	2.1e-40	13.1	7.27e-35
chr11-146	chr11	106027132	106027258	+	9.02	0.753	46	47	3.7	12.65	6.32e-35	12.18	3.25e-34
chr11-115	chr11	118491982	118492108	+	9.02	0.604	49	47	2.8	16.87	2.1e-40	6.96	5.1e-24
chr11-134	chr11	130283452	130283578	+	9.02	0.756	47	47	6.5	7.23	1.1e-24	10.32	3.94e-31
chr12-82	chr12	90647579	90647705	+	9.02	0.556	49	47	6.5	7.23	1.1e-24	10.19	2.86e-30
chr12-91	chr12	104458156	104458282	+	9.02	0.622	47	47	11.1	4.22	1.19e-15	9.34	2.65e-29
chr12-83	chr12	105186499	105186625	+	9.02	0.711	49	47	3.7	12.65	6.32e-35	11.82	1.16e-33
chr12-92	chr12	110984321	110984447	+	9.02	0.709	47	47	2.8	16.87	2.1e-40	9.37	2.38e-29
chr14-112	chr14	61822767	61822893	+	9.02	0.776	45	47	4.6	10.12	9.14e-31	12.14	3.75e-34
chr14-85	chr14	69378380	69378506	+	9.02	0.622	47	47	3.7	12.65	6.32e-35	10.35	3.49e-31
chr14-86	chr14	71787045	71787171	+	9.02	0.671	47	47	3.7	12.65	6.32e-35	7.84	1.3e-25
chr14-135	chr14	73133508	73133634	+	9.02	0.767	42	47	2.8	16.87	2.1e-40	9.25	4.06e-29
chr14-90	chr14	80064853	80064979	+	9.02	0.712	47	47	4.6	10.12	9.14e-31	11.31	7.84e-33
chr15-16	chr15	72519076	72519202	+	9.02	0.705	47	47	4.6	10.12	9.14e-31	6.99	4.37e-24
chr15-21	chr15	80872513	80872639	+	9.02	0.714	45	47	8.4	5.62	2.42e-20	11.18	6.01e-32
chr16-55	chr16	1696089	1696215	+	9.02	0.644	47	47	4.6	10.12	9.14e-31	11.98	6.64e-34
chr16-60	chr16	4349169	4349295	+	9.02	0.688	46	48	5.6	8.61	2.25e-28	13.29	3.88e-35
chr16-56	chr16	31484344	31484470	+	9.02	0.821	47	47	7.4	6.32	2.36e-22	11.75	1.54e-33
chr16-225	chr16	35237092	35237218	+	9.02	0.75	28	47	8.4	5.62	2.42e-20	5.41	1.11e-19
chr16-51	chr16	48443980	48444106	+	9.02	0.711	48	47	1.9	25.3	2.76e-48	14.05	6.45e-37
chr17-136	chr17	37892650	37892776	+	9.02	0.769	48	47	3.7	12.65	6.32e-35	8.38	2.52e-27
chr17-124	chr17	42979076	42979202	+	9.02	0.659	49	47	6.5	7.23	1.1e-24	5.51	5.23e-20
chr17-116	chr17	48296337	48296463	+	9.02	0.67	50	47	5.6	8.43	1.94e-27	8.42	2.08e-27
chr17-127	chr17	75251530	75251656	+	9.02	0.532	49	48	2.8	17.22	1.22e-41	6	1.9e-21
chr18-40	chr18	20046782	20046908	+	9.02	0.714	49	49	4.6	10.55	8.35e-33	10.41	2.74e-31
chr18-43	chr18	30594086	30594212	+	9.02	0.639	48	47	5.6	8.43	1.94e-27	20.91	1.18e-43
chr18-44	chr18	33889634	33889760	+	9.02	0.686	48	49	6.5	7.54	1.96e-26	8.76	1.42e-27
chr19-263	chr19	7433994	7434120	+	9.02	0.785	44	47	7.4	6.32	2.36e-22	8.32	3.35e-27
chr19-186	chr19	11050233	11050359	+	9.02	0.61	49	47	4.6	10.12	9.14e-31	6.78	1.47e-23
chr19-203	chr19	13373326	13373452	+	9.02	0.768	48	47	5.6	8.43	1.94e-27	6.11	9.26e-22
chr19-230	chr19	13541940	13542066	+	9.02	0.589	46	48	4.6	10.33	8.83e-32	7.12	6.05e-24
chr19-189	chr19	17416396	17416522	+	9.02	0.587	49	47	8.4	5.62	2.42e-20	4.83	1.82e-17
chr19-206	chr19	18682529	18682655	+	9.02	0.642	48	47	10.2	4.6	4.94e-17	5.66	1.91e-20
chr19-208	chr19	39390397	39390523	+	9.02	0.577	48	47	2.8	16.87	2.1e-40	8.03	1.47e-26
chr19-235	chr19	40854471	40854597	+	9.02	0.709	46	47	4.6	10.12	9.14e-31	9.34	2.65e-29
chr19-256	chr19	41770010	41770136	+	9.02	0.57	45	47	4.6	10.12	9.14e-31	6.6	4.43e-23
chr19-195	chr19	46088114	46088240	+	9.02	0.683	49	47	2.8	16.87	2.1e-40	7.31	7.04e-25
chr19-213	chr19	56652511	56652637	+	9.02	0.632	48	48	4.6	10.33	8.83e-32	8.23	5.35e-27
chr19-226	chr19	57874557	57874683	+	9.02	0.674	47	47	1.9	25.3	2.76e-48	14.48	1.01e-36
chr19-239	chr19	58987348	58987474	+	9.02	0.67	46	47	3.7	12.65	6.32e-35	10.23	5.64e-31
chr19-262	chr19	59055731	59055857	+	9.02	0.73	45	47	6.5	7.23	1.1e-24	10.68	9.06e-32
chr20-102	chr20	34204317	34204443	+	9.02	0.7	48	47	6.5	7.23	1.1e-24	5.41	1.05e-19
chr20-109	chr20	39370255	39370381	+	9.02	0.783	47	47	2.8	16.87	2.1e-40	9.32	2.95e-29
chr20-94	chr20	47549276	47549402	+	9.02	0.596	49	47	4.6	10.12	9.14e-31	5.86	4.64e-21
chr21-40	chr21	40493984	40494110	+	9.02	0.687	46	47	1.9	25.3	2.76e-48	12.3	2.11e-34
chr22-8	chr22	38635254	38635380	+	9.02	0.74	46	47	3.7	12.65	6.32e-35	8.85	9.49e-28
chr22-9	chr22	47330937	47331063	+	9.02	0.8	46	48	1.9	25.84	1.07e-49	16.31	9.21e-40
chrX-32	chrX	149108214	149108340	+	9.02	0.596	47	47	4.6	10.12	9.14e-31	9.49	1.38e-29
chr1-197	chr1	9970597	9970723	+	8.83	0.67	49	48	3.7	12.92	4.88e-36	6.73	1.68e-22
chr1-211	chr1	16971180	16971306	+	8.83	0.688	48	46	9.3	4.95	7.04e-18	6.86	2.63e-23
chr1-200	chr1	32405513	32405639	+	8.83	0.838	49	47	2.8	16.87	2.1e-40	7	1.22e-23
chr1-279	chr1	84367485	84367611	+	8.83	0.647	44	46	3.7	12.38	8.01e-34	13	5.17e-34
chr1-226	chr1	93288523	93288649	+	8.83	0.725	47	46	5.6	8.25	1.64e-26	8.04	4.84e-26
chr1-227	chr1	110091120	110091246	+	8.83	0.704	47	46	3.7	12.38	8.01e-34	7.77	6.55e-24
chr1-228	chr1	112135579	112135705	+	8.83	0.67	47	48	5.6	8.61	2.25e-28	12.46	6.09e-34
chr1-229	chr1	115300098	115300224	+	8.83	0.818	47	46	5.6	8.25	1.64e-26	16.82	1.05e-38
chr1-265	chr1	145827082	145827208	+	8.83	0.833	45	46	5.6	8.25	1.64e-26	21.54	3.22e-44
chr1-232	chr1	149911023	149911149	+	8.83	0.757	47	46	2.8	16.51	3.55e-39	9.8	1.45e-29
chr1-233	chr1	152025179	152025305	+	8.83	0.794	47	47	3.7	12.65	6.32e-35	7.95	7.59e-26
chr1-251	chr1	197170645	197170771	+	8.83	0.8	46	46	2.8	16.51	3.55e-39	13.44	2.4e-35
chr1-235	chr1	205255807	205255933	+	8.83	0.697	47	46	3.7	12.38	8.01e-34	8.37	9.07e-27
chr1-253	chr1	206677578	206677704	+	8.83	0.747	46	46	6.5	7.07	7.97e-24	7.36	1.67e-24
chr1-287	chr1	212204398	212204524	+	8.83	0.797	44	46	2.8	16.51	3.55e-39	10.05	5.15e-30
chr1-237	chr1	218550700	218550826	+	8.83	0.611	47	47	5.6	8.43	1.94e-27	10.35	6.3e-30
chr1-254	chr1	234659411	234659537	+	8.83	0.833	46	48	8.4	5.74	4.2e-21	12.42	7.05e-34
chr2-145	chr2	27940057	27940183	+	8.83	0.736	48	46	0.9	49.52	2.42e-60	8.37	9.07e-27
chr2-147	chr2	65066189	65066315	+	8.83	0.663	48	46	3.7	12.38	8.01e-34	8	5.8e-26
chr2-148	chr2	65233712	65233838	+	8.83	0.724	48	47	0.9	50.6	4.78e-62	14.54	8.49e-37
chr2-149	chr2	69056458	69056584	+	8.83	0.688	48	47	5.6	8.43	1.94e-27	9.17	2.23e-28
chr2-177	chr2	70056672	70056798	+	8.83	0.711	45	46	4.6	9.9	9.27e-30	11.72	7.97e-33
chr2-152	chr2	85173592	85173718	+	8.83	0.667	48	46	6.5	7.07	7.97e-24	10.87	1.92e-31
chr2-169	chr2	85555076	85555202	+	8.83	0.76	46	46	11.1	4.13	5.07e-15	12.37	8.17e-34
chr2-178	chr2	85969016	85969142	+	8.83	0.525	45	46	4.6	9.9	9.27e-30	5.8	1.89e-20
chr2-182	chr2	101179306	101179432	+	8.83	0.735	45	46	11.1	4.13	5.07e-15	8.79	4.63e-27
chr3-58	chr3	4508861	4508987	+	8.83	0.794	49	47	2.8	16.87	2.1e-40	15.03	2.05e-37
chr3-63	chr3	9438669	9438795	+	8.83	0.711	48	48	3.7	12.92	4.88e-36	8.95	2.27e-27
chr3-69	chr3	11420814	11420940	+	8.83	0.829	47	47	5.6	8.43	1.94e-27	13.24	4.54e-35
chr3-70	chr3	49824077	49824203	+	8.83	0.734	47	46	5.6	8.25	1.64e-26	10.28	2e-30
chr3-66	chr3	75692251	75692377	+	8.83	0.841	48	46	7.4	6.19	1.5e-21	6.09	7.3e-21
chr3-92	chr3	99129677	99129803	+	8.83	0.79	45	46	6.5	7.07	7.97e-24	22.21	8.39e-45
chr3-68	chr3	150421616	150421742	+	8.83	0.709	48	46	2.8	16.51	3.55e-39	15.09	1.71e-37
chr3-93	chr3	189838741	189838867	+	8.83	0.833	45	46	7.4	6.19	1.5e-21	9.19	2.01e-28
chr4-66	chr4	1040326	1040452	+	8.83	0.57	46	46	9.3	4.95	7.04e-18	6.44	3.15e-22
chr4-81	chr4	39699705	39699831	+	8.83	0.789	44	46	2.8	16.51	3.55e-39	12.15	8.78e-33
chr4-64	chr4	75397748	75397874	+	8.83	0.844	47	46	6.5	7.07	7.97e-24	21.16	7.06e-44
chr4-78	chr4	141188266	141188392	+	8.83	0.566	45	46	6.5	7.07	7.97e-24	8.7	1.91e-27
chr5-76	chr5	10441901	10442027	+	8.83	0.8	48	47	3.7	12.65	6.32e-35	12.42	7.05e-34
chr5-95	chr5	37787098	37787224	+	8.83	0.743	46	46	6.5	7.07	7.97e-24	11.61	1.2e-32
chr5-97	chr5	61529326	61529452	+	8.83	0.762	46	46	2.8	16.51	3.55e-39	23.64	4.97e-45
chr5-89	chr5	74807642	74807768	+	8.83	0.678	47	47	4.6	10.12	9.14e-31	11.46	2.07e-32
chr5-90	chr5	81653318	81653444	+	8.83	0.57	47	46	8.4	5.5	1.37e-19	7.59	4.76e-25
chr5-91	chr5	86416517	86416643	+	8.83	0.7	47	46	8.4	5.5	1.37e-19	13.44	2.4e-35
chr5-92	chr5	123965017	123965143	+	8.83	0.696	47	46	0.9	49.52	2.42e-60	8.87	8.57e-28
chr5-102	chr5	142252484	142252610	+	8.83	0.716	46	46	3.7	12.38	8.01e-34	8.58	3.46e-27
chr5-103	chr5	171612838	171612964	+	8.83	0.659	46	46	4.6	9.9	9.27e-30	7.96	6.94e-26
chr5-87	chr5	173315108	173315234	+	8.83	0.714	48	46	3.7	12.38	8.01e-34	11.35	3.1e-32
chr6-294	chr6	1190725	1190851	+	8.83	0.651	47	46	5.6	8.25	1.64e-26	9.88	1.03e-29
chr6-296	chr6	8064601	8064727	+	8.83	0.683	47	47	7.4	6.32	2.36e-22	11.72	7.97e-33
chr6-346	chr6	11144688	11144814	+	8.83	0.714	45	46	8.4	5.5	1.37e-19	7.3	6.99e-24
chr6-267	chr6	14733392	14733518	+	8.83	0.722	49	46	8.4	5.5	1.37e-19	6.72	5.99e-23
chr6-348	chr6	15027089	15027215	+	8.83	0.679	45	46	9.3	4.95	7.04e-18	8.9	7.74e-28
chr6-297	chr6	16752846	16752972	+	8.83	0.785	47	46	6.5	7.07	7.97e-24	11.39	2.71e-32
chr6-325	chr6	22881355	22881481	+	8.83	0.707	46	47	4.6	10.12	9.14e-31	14.66	5.98e-37
chr6-326	chr6	25963015	25963141	+	8.83	0.768	46	46	6.5	7.07	7.97e-24	7.54	6.13e-25
chr6-300	chr6	31619643	31619769	+	8.83	0.6	47	46	9.3	4.95	7.04e-18	5.62	6e-20
chr6-442	chr6	34954633	34954759	+	8.83	0.732	41	46	5.6	8.25	1.64e-26	5.97	6.06e-21
chr6-330	chr6	35338088	35338214	+	8.83	0.678	46	46	9.3	4.95	7.04e-18	4.39	5.74e-16
chr6-310	chr6	37157714	37157840	+	8.83	0.682	47	46	3.7	12.38	8.01e-34	5.41	2.59e-19
chr6-356	chr6	39809192	39809318	+	8.83	0.704	45	46	6.5	7.07	7.97e-24	5.81	1.67e-20
chr6-358	chr6	41938085	41938211	+	8.83	0.674	45	46	8.4	5.5	1.37e-19	4.49	2.57e-16
chr6-360	chr6	43670770	43670896	+	8.83	0.674	45	46	3.7	12.38	8.01e-34	5.07	2.89e-18
chr6-338	chr6	44205313	44205439	+	8.83	0.635	46	46	9.3	4.95	7.04e-18	5.87	1.14e-20
chr6-292	chr6	133135603	133135729	+	8.83	0.667	48	47	2.8	16.87	2.1e-40	12.46	6.09e-34
chr6-319	chr6	158452483	158452609	+	8.83	0.762	47	46	4.6	9.9	9.27e-30	11.46	2.07e-32
chr6-363	chr6	169825245	169825371	+	8.83	0.769	45	46	2.8	16.51	3.55e-39	6.33	6.31e-22
chr7-100	chr7	62015193	62015319	+	8.83	0.778	39	46	11.1	4.13	5.07e-15	10.43	1.1e-30
chr7-58	chr7	99102480	99102606	+	8.83	0.774	46	46	6.5	7.07	7.97e-24	15.82	2.21e-38
chr7-43	chr7	131318270	131318396	+	8.83	0.783	49	46	0.9	49.52	2.42e-60	16.56	3.12e-39
chr7-80	chr7	155127744	155127870	+	8.83	0.773	42	46	9.3	4.95	7.04e-18	5.01	4.62e-18
chr8-98	chr8	22573343	22573469	+	8.83	0.611	46	46	2.8	16.51	3.55e-39	9.11	1.1e-27
chr8-92	chr8	102374743	102374869	+	8.83	0.611	47	47	1.9	25.3	2.76e-48	4.91	9.97e-18
chr8-105	chr8	128920162	128920288	+	8.83	0.701	46	46	4.6	9.9	9.27e-30	6.22	1.25e-21
chr9-80	chr9	33161164	33161290	+	8.83	0.718	45	46	9.3	4.95	7.04e-18	8.13	3.06e-26
chr9-74	chr9	33415707	33415833	+	8.83	0.72	46	46	2.8	16.51	3.55e-39	9.01	4.64e-28
chr9-60	chr9	88936395	88936521	+	8.83	0.692	49	47	5.6	8.43	1.94e-27	13.24	4.54e-35
chr9-75	chr9	97041034	97041160	+	8.83	0.718	46	46	3.7	12.38	8.01e-34	14.22	1.24e-35
chr9-69	chr9	107631362	107631488	+	8.83	0.767	47	46	7.4	6.19	1.5e-21	9.18	8.04e-28
chr9-70	chr9	111906313	111906439	+	8.83	0.738	47	46	4.6	9.9	9.27e-30	12.91	1.35e-34
chr9-71	chr9	112089619	112089745	+	8.83	0.761	47	46	6.5	7.07	7.97e-24	9.19	2.01e-28
chr9-100	chr9	135485381	135485507	+	8.83	0.845	44	46	2.8	16.51	3.55e-39	9.94	3.28e-29
chr10-98	chr10	4386744	4386870	+	8.83	0.733	48	48	1.9	25.84	1.07e-49	15.75	2.67e-38
chr10-134	chr10	29421078	29421204	+	8.83	0.763	44	47	3.7	12.65	6.32e-35	12.96	1.16e-34
chr10-136	chr10	64576600	64576726	+	8.83	0.646	44	46	2.8	16.51	3.55e-39	9.74	1.82e-29
chr10-86	chr10	72163742	72163868	+	8.83	0.718	51	46	6.5	7.07	7.97e-24	9.35	1.53e-27
chr10-109	chr10	80717364	80717490	+	8.83	0.714	47	46	4.6	9.9	9.27e-30	6.76	4.8e-23
chr10-102	chr10	91982178	91982304	+	8.83	0.747	48	46	2.8	16.51	3.55e-39	11.25	4.62e-32
chr10-121	chr10	114709979	114710105	+	8.83	0.653	46	46	3.7	12.38	8.01e-34	13	5.17e-34
chr10-111	chr10	121441668	121441794	+	8.83	0.596	47	47	2.8	16.87	2.1e-40	6.53	1.92e-22
chr10-122	chr10	126315661	126315787	+	8.83	0.659	46	46	2.8	16.51	3.55e-39	9.02	1.67e-27
chr11-127	chr11	1060904	1061030	+	8.83	0.753	47	46	3.7	12.38	8.01e-34	10.84	2.18e-31
chr11-98	chr11	62366663	62366789	+	8.83	0.663	50	47	2.8	16.87	2.1e-40	8.2	2.12e-26
chr11-143	chr11	70270378	70270504	+	8.83	0.741	46	46	1.9	24.76	6.99e-47	7.98	6.34e-26
chr11-130	chr11	71791680	71791806	+	8.83	0.532	47	46	3.7	12.38	8.01e-34	8.88	3.09e-27
chr12-99	chr12	57030894	57031020	+	8.83	0.632	46	46	1.9	24.76	6.99e-47	8.64	9.29e-27
chr12-85	chr12	89938741	89938867	+	8.83	0.64	48	46	3.7	12.38	8.01e-34	6.98	1.32e-23
chr12-103	chr12	96641551	96641677	+	8.83	0.682	46	46	6.5	7.07	7.97e-24	8.4	9.75e-26
chr12-110	chr12	109915046	109915172	+	8.83	0.7	45	46	8.4	5.5	1.37e-19	10.58	5.94e-31
chr12-104	chr12	113652875	113653001	+	8.83	0.598	46	46	8.4	5.5	1.37e-19	7.11	6.55e-24
chr12-94	chr12	120669342	120669468	+	8.83	0.716	47	46	5.6	8.25	1.64e-26	4.04	1.1e-14
chr12-95	chr12	120729863	120729989	+	8.83	0.648	47	47	3.7	12.65	6.32e-35	6.12	2.28e-21
chr14-83	chr14	21924270	21924396	+	8.83	0.757	47	46	6.5	7.07	7.97e-24	16.18	8.4e-39
chr14-72	chr14	23122357	23122483	+	8.83	0.667	49	46	2.8	16.51	3.55e-39	7.2	4.06e-24
chr14-73	chr14	32461512	32461638	+	8.83	0.757	49	46	2.8	16.51	3.55e-39	7.27	2.72e-24
chr14-92	chr14	54795979	54796105	+	8.83	0.667	46	46	10.2	4.5	2.28e-16	6.51	2.06e-22
chr14-93	chr14	56247188	56247314	+	8.83	0.705	46	46	5.6	8.25	1.64e-26	7.53	6.67e-25
chr14-94	chr14	56586568	56586694	+	8.83	0.724	46	46	3.7	12.38	8.01e-34	7.56	5.64e-25
chr14-98	chr14	73525122	73525248	+	8.83	0.684	46	46	4.6	9.9	9.27e-30	12.45	3.17e-33
chr14-113	chr14	73970497	73970623	+	8.83	0.663	45	46	5.6	8.25	1.64e-26	8.9	7.74e-28
chr14-120	chr14	75087353	75087479	+	8.83	0.674	44	46	5.6	8.25	1.64e-26	5.36	3.63e-19
chr14-102	chr14	81408045	81408171	+	8.83	0.655	46	47	3.7	12.65	6.32e-35	13.44	2.4e-35
chr15-26	chr15	51424997	51425123	+	8.83	0.73	43	46	3.7	12.38	8.01e-34	14.08	3.34e-36
chr15-18	chr15	89182144	89182270	+	8.83	0.797	46	46	1.9	24.76	6.99e-47	14.05	2.05e-35
chr16-61	chr16	4666210	4666336	+	8.83	0.746	46	46	2.8	16.51	3.55e-39	13.44	2.4e-35
chr16-65	chr16	67207724	67207850	+	8.83	0.602	46	46	3.7	12.38	8.01e-34	9.24	1.63e-28
chr16-58	chr16	72698806	72698932	+	8.83	0.875	47	46	7.4	6.19	1.5e-21	21.41	4.19e-44
chr16-59	chr16	89984399	89984525	+	8.83	0.761	47	46	5.6	8.25	1.64e-26	8.7	1.91e-27
chr17-111	chr17	2310288	2310414	+	8.83	0.646	50	46	4.6	9.9	9.27e-30	7.07	8.29e-24
chr17-146	chr17	7518557	7518683	+	8.83	0.687	46	46	3.7	12.38	8.01e-34	8.87	8.57e-28
chr17-131	chr17	7671129	7671255	+	8.83	0.632	48	46	5.6	8.25	1.64e-26	9.96	7.3e-30
chr17-132	chr17	17824658	17824784	+	8.83	0.712	48	46	4.6	9.9	9.27e-30	9.8	1.45e-29
chr17-148	chr17	37356271	37356397	+	8.83	0.746	46	46	2.8	16.51	3.55e-39	9.1	3.06e-28
chr17-143	chr17	40670647	40670773	+	8.83	0.771	47	46	8.4	5.5	1.37e-19	6.66	2.43e-22
chr17-152	chr17	46095788	46095914	+	8.83	0.692	46	47	4.6	10.12	9.14e-31	8.13	3.06e-26
chr17-140	chr17	66031506	66031632	+	8.83	0.691	48	46	3.7	12.38	8.01e-34	10.46	9.7e-31
chr17-163	chr17	66818224	66818350	+	8.83	0.705	45	46	5.6	8.25	1.64e-26	12.12	1.95e-33
chr18-38	chr18	60093051	60093177	+	8.83	0.707	50	46	3.7	12.38	8.01e-34	17.79	1.38e-40
chr19-227	chr19	879746	879872	+	8.83	0.681	46	46	10.2	4.5	2.28e-16	7.24	3.19e-24
chr19-201	chr19	7694591	7694717	+	8.83	0.696	48	49	12.1	4.06	1.27e-15	6.73	5.57e-23
chr19-228	chr19	7756553	7756679	+	8.83	0.514	46	47	3.7	12.65	6.32e-35	4.46	3.08e-16
chr19-229	chr19	9517670	9517796	+	8.83	0.663	46	46	4.6	9.9	9.27e-30	12.08	2.25e-33
chr19-218	chr19	17876126	17876252	+	8.83	0.753	47	47	2.8	16.87	2.1e-40	7.22	3.46e-24
chr19-194	chr19	38781298	38781424	+	8.83	0.789	49	46	2.8	16.51	3.55e-39	8.66	2.33e-27
chr19-236	chr19	42724269	42724395	+	8.83	0.775	46	46	3.7	12.38	8.01e-34	9.59	3.56e-29
chr19-224	chr19	48232821	48232947	+	8.83	0.611	47	47	2.8	16.87	2.1e-40	7.04	2.93e-23
chr20-106	chr20	17662960	17663086	+	8.83	0.833	47	46	4.6	9.9	9.27e-30	10.8	2.48e-31
chr20-96	chr20	48212456	48212582	+	8.83	0.711	49	48	8.4	5.74	4.2e-21	6.71	1.81e-22
chr20-119	chr20	49341474	49341600	+	8.83	0.678	46	46	7.4	6.19	1.5e-21	6.76	4.8e-23
chr20-120	chr20	52532436	52532562	+	8.83	0.675	46	46	5.6	8.25	1.64e-26	7.24	9.67e-24
chr20-83	chr20	61298486	61298612	+	8.83	0.617	52	47	6.5	7.23	1.1e-24	4.97	5.99e-18
chr21-39	chr21	46293678	46293804	+	8.83	0.688	47	46	3.7	12.38	8.01e-34	10.67	4.09e-31
chr22-7	chr22	43315399	43315525	+	8.83	0.675	48	46	5.6	8.25	1.64e-26	8.9	2.79e-27
chr1-299	chr1	11863642	11863768	+	8.64	0.667	43	45	4.6	9.69	9.21e-29	5.11	4.91e-18
chr1-258	chr1	27449208	27449334	+	8.64	0.787	45	45	3.7	12.11	9.93e-33	9.91	3.68e-29
chr1-225	chr1	62902367	62902493	+	8.64	0.706	47	45	4.6	9.69	9.21e-29	11.14	3.09e-31
chr1-243	chr1	67805456	67805582	+	8.64	0.776	46	45	4.6	9.69	9.21e-29	9.85	4.63e-29
chr1-281	chr1	109289244	109289370	+	8.64	0.687	44	45	5.6	8.07	1.36e-25	12.68	1.5e-33
chr1-264	chr1	117098452	117098578	+	8.64	0.79	45	45	5.6	8.07	1.36e-25	13.4	1.47e-34
chr1-204	chr1	150602166	150602292	+	8.64	0.716	49	46	1.9	24.76	6.99e-47	8.33	3.95e-26
chr1-247	chr1	155246970	155247096	+	8.64	0.692	46	45	5.6	8.07	1.36e-25	9.74	7.29e-29
chr1-236	chr1	210567071	210567197	+	8.64	0.643	47	45	6.5	6.92	5.66e-23	11.28	1.83e-31
chr1-346	chr1	214776366	214776492	+	8.64	0.747	42	45	2.8	16.15	5.87e-38	12.36	4.25e-33
chr1-290	chr1	227947182	227947308	+	8.64	0.707	44	45	2.8	16.15	5.87e-38	10.73	1.44e-30
chr2-158	chr2	24283844	24283970	+	8.64	0.662	47	45	1.9	24.22	1.73e-45	11.11	3.53e-31
chr2-150	chr2	70141738	70141864	+	8.64	0.667	48	45	10.2	4.4	1.03e-15	9.27	2.1e-27
chr2-162	chr2	100279224	100279350	+	8.64	0.75	47	45	3.7	12.11	9.93e-33	13.35	1.72e-34
chr3-96	chr3	37902002	37902128	+	8.64	0.633	44	45	3.7	12.11	9.93e-33	8.51	1.67e-26
chr3-81	chr3	46559026	46559152	+	8.64	0.746	46	45	4.6	9.69	9.21e-29	13.15	3.24e-34
chr3-71	chr3	56166417	56166543	+	8.64	0.775	47	45	1.9	24.22	1.73e-45	16.82	1.05e-38
chr3-83	chr3	75484383	75484509	+	8.64	0.591	46	45	5.6	8.07	1.36e-25	12.15	8.78e-33
chr3-103	chr3	124829531	124829657	+	8.64	0.586	44	45	1.9	24.22	1.73e-45	9.25	5.85e-28
chr3-84	chr3	159483088	159483214	+	8.64	0.712	46	45	0.9	48.44	1.2e-58	11.48	4.23e-31
chr3-85	chr3	183088691	183088817	+	8.64	0.726	46	45	8.4	5.38	7.55e-19	9.77	6.51e-29
chr4-57	chr4	15683279	15683405	+	8.64	0.667	49	45	3.7	12.11	9.93e-33	14.76	2.59e-36
chr4-68	chr4	20424237	20424363	+	8.64	0.789	46	45	5.6	8.07	1.36e-25	16.9	8.54e-39
chr4-70	chr4	54554554	54554680	+	8.64	0.727	46	45	5.6	8.07	1.36e-25	10.76	1.27e-30
chr4-62	chr4	99609613	99609739	+	8.64	0.663	48	45	4.6	9.69	9.21e-29	7.31	2.12e-23
chr4-77	chr4	129244335	129244461	+	8.64	0.602	45	45	7.4	6.06	9.32e-21	9.48	2.21e-28
chr4-86	chr4	173903409	173903535	+	8.64	0.8	44	45	8.4	5.38	7.55e-19	16.58	1.92e-38
chr4-87	chr4	184255307	184255433	+	8.64	0.8	44	45	5.6	8.07	1.36e-25	13.67	6.55e-35
chr5-94	chr5	911878	912004	+	8.64	0.714	46	45	3.7	12.11	9.93e-33	5.73	7.18e-20
chr5-105	chr5	9060148	9060274	+	8.64	0.707	45	45	5.6	8.07	1.36e-25	13.51	1.06e-34
chr5-88	chr5	51953103	51953229	+	8.64	0.905	47	45	1.9	24.22	1.73e-45	17.15	4.6e-39
chr5-98	chr5	68201099	68201225	+	8.64	0.758	46	45	2.8	16.15	5.87e-38	15.07	6.5e-36
chr5-99	chr5	71604227	71604353	+	8.64	0.73	46	46	5.6	8.25	1.64e-26	16.05	7.64e-38
chr5-85	chr5	150494987	150495113	+	8.64	0.803	48	46	3.7	12.38	8.01e-34	10.14	1.45e-29
chr6-245	chr6	9766508	9766634	+	8.64	0.641	50	45	8.4	5.38	7.55e-19	7.59	1.56e-24
chr6-322	chr6	13487901	13488027	+	8.64	0.584	46	45	2.8	16.15	5.87e-38	7.56	1.85e-24
chr6-351	chr6	31368453	31368579	+	8.64	0.685	45	45	3.7	12.11	9.93e-33	6.49	6.67e-22
chr6-274	chr6	32577699	32577825	+	8.64	0.686	49	45	10.2	4.4	1.03e-15	14.7	3.09e-36
chr6-395	chr6	35944863	35944989	+	8.64	0.706	43	45	5.6	8.07	1.36e-25	6.14	1.47e-20
chr6-334	chr6	36702513	36702639	+	8.64	0.611	46	45	11.1	4.04	2.1e-14	4.3	2.33e-15
chr6-335	chr6	37759221	37759347	+	8.64	0.596	46	46	5.6	8.25	1.64e-26	4.53	3.79e-16
chr6-318	chr6	64281743	64281869	+	8.64	0.75	47	45	7.4	6.06	9.32e-21	12.54	2.35e-33
chr6-342	chr6	69360915	69361041	+	8.64	0.718	46	45	2.8	16.15	5.87e-38	10.44	4.38e-30
chr7-50	chr7	6486727	6486853	+	8.64	0.724	47	45	3.7	12.11	9.93e-33	9.35	3.81e-28
chr7-67	chr7	158130135	158130261	+	8.64	0.667	44	45	4.6	9.69	9.21e-29	6.18	4.29e-21
chr8-99	chr8	38854146	38854272	+	8.64	0.679	46	45	6.5	6.92	5.66e-23	16.82	1.05e-38
chr8-112	chr8	81963039	81963165	+	8.64	0.675	45	45	3.7	12.11	9.93e-33	9.64	1.14e-28
chr8-113	chr8	94929000	94929126	+	8.64	0.622	45	45	4.6	9.69	9.21e-29	11.04	4.57e-31
chr8-114	chr8	108749794	108749920	+	8.64	0.667	45	45	4.6	9.69	9.21e-29	11.18	2.71e-31
chr8-102	chr8	117560615	117560741	+	8.64	0.756	46	45	3.7	12.11	9.93e-33	8.05	5.22e-25
chr8-83	chr8	132816473	132816599	+	8.64	0.709	49	45	6.5	6.92	5.66e-23	8.77	5.12e-27
chr8-107	chr8	133772790	133772916	+	8.64	0.726	46	45	5.6	8.07	1.36e-25	8.37	3.27e-26
chr9-85	chr9	107669157	107669283	+	8.64	0.716	45	45	7.4	6.06	9.32e-21	12.91	3.66e-33
chr9-76	chr9	113422316	113422442	+	8.64	0.625	46	45	3.7	12.11	9.93e-33	15.55	2.9e-37
chr9-86	chr9	115950276	115950402	+	8.64	0.757	45	45	0.9	48.44	1.2e-58	14.02	1.26e-34
chr9-66	chr9	131644257	131644383	+	8.64	0.703	48	45	4.6	9.69	9.21e-29	9.61	1.28e-28
chr9-90	chr9	139305017	139305143	+	8.64	0.778	45	45	6.5	6.92	5.66e-23	9.72	8.16e-29
chr9-79	chr9	139978117	139978243	+	8.64	0.549	46	45	2.8	16.15	5.87e-38	7.4	4.27e-24
chr10-126	chr10	25305303	25305429	+	8.64	0.722	45	45	1.9	24.22	1.73e-45	19.44	1.69e-40
chr10-117	chr10	46983768	46983894	+	8.64	0.667	46	47	5.6	8.43	1.94e-27	5.14	2.17e-17
chr10-130	chr10	70310599	70310725	+	8.64	0.675	45	46	3.7	12.38	8.01e-34	11.21	2.38e-31
chr10-138	chr10	75385788	75385914	+	8.64	0.683	44	45	3.7	12.11	9.93e-33	11.4	1.23e-31
chr10-140	chr10	95143938	95144064	+	8.64	0.693	44	45	4.6	9.69	9.21e-29	9.58	1.43e-28
chr10-110	chr10	100083108	100083234	+	8.64	0.69	47	46	2.8	16.51	3.55e-39	8.12	1.1e-25
chr11-136	chr11	2934503	2934629	+	8.64	0.76	46	46	7.4	6.19	1.5e-21	10.6	2.37e-30
chr11-139	chr11	6715278	6715404	+	8.64	0.617	46	46	3.7	12.38	8.01e-34	8.49	6.64e-26
chr11-140	chr11	13365801	13365927	+	8.64	0.704	46	45	4.6	9.69	9.21e-29	7.29	7.58e-24
chr11-149	chr11	28129705	28129831	+	8.64	0.684	45	45	9.3	4.84	3.5e-17	15.34	5.07e-37
chr11-141	chr11	46148797	46148923	+	8.64	0.75	46	46	3.7	12.38	8.01e-34	6.77	1.15e-21
chr11-144	chr11	72896879	72897005	+	8.64	0.711	46	46	3.7	12.38	8.01e-34	9.16	8.93e-28
chr11-152	chr11	76092187	76092313	+	8.64	0.69	45	45	7.4	6.06	9.32e-21	11.21	2.38e-31
chr11-101	chr11	76236133	76236259	+	8.64	0.789	50	45	8.4	5.38	7.55e-19	18.13	4.36e-40
chr11-162	chr11	76481745	76481871	+	8.64	0.77	44	45	5.6	8.07	1.36e-25	7.14	1.69e-23
chr11-133	chr11	118782631	118782757	+	8.64	0.584	47	46	9.3	4.95	7.04e-18	5.47	9.98e-19
chr12-97	chr12	12956263	12956389	+	8.64	0.826	46	46	3.7	12.38	8.01e-34	11.74	3.6e-32
chr12-155	chr12	94656175	94656301	+	8.64	0.703	41	45	7.4	6.06	9.32e-21	12.26	2.96e-32
chr12-108	chr12	97798458	97798584	+	8.64	0.869	45	45	5.6	8.07	1.36e-25	15.21	7.33e-37
chr12-109	chr12	107350462	107350588	+	8.64	0.636	45	45	5.6	8.07	1.36e-25	7.4	4.27e-24
chr13-11	chr13	21951637	21951763	+	8.64	0.907	43	45	8.4	5.38	7.55e-19	22.43	4.8e-44
chr13-7	chr13	76334436	76334562	+	8.64	0.718	46	45	3.7	12.11	9.93e-33	14.08	1.07e-34
chr14-91	chr14	25165811	25165937	+	8.64	0.626	46	45	0.5	96.89	5.41e-72	5.18	3.2e-18
chr14-132	chr14	51706730	51706856	+	8.64	0.716	42	45	8.4	5.38	7.55e-19	9.38	3.42e-28
chr14-95	chr14	59565189	59565315	+	8.64	0.658	46	45	5.6	8.07	1.36e-25	8.77	5.12e-27
chr14-97	chr14	68765054	68765180	+	8.64	0.785	46	45	2.8	16.15	5.87e-38	11.74	3.6e-32
chr14-82	chr14	73432066	73432192	+	8.64	0.684	48	45	3.7	12.11	9.93e-33	6.49	6.67e-22
chr14-87	chr14	75086552	75086678	+	8.64	0.677	47	45	6.5	6.92	5.66e-23	5.08	6.07e-18
chr14-99	chr14	76618824	76618950	+	8.64	0.703	46	45	1.9	24.22	1.73e-45	9.91	1.47e-28
chr14-100	chr14	77564312	77564438	+	8.64	0.671	46	45	4.6	9.69	9.21e-29	7.36	5.04e-24
chr14-101	chr14	77769331	77769457	+	8.64	0.702	46	45	7.4	6.06	9.32e-21	6.97	4.32e-23
chr14-88	chr14	77770065	77770191	+	8.64	0.639	47	45	8.4	5.38	7.55e-19	7.18	1.33e-23
chr14-115	chr14	77924083	77924209	+	8.64	0.594	45	45	4.6	9.69	9.21e-29	10.82	4.46e-30
chr14-89	chr14	79511660	79511786	+	8.64	0.735	47	45	4.6	9.69	9.21e-29	16.42	2.86e-38
chr14-104	chr14	105154222	105154348	+	8.64	0.739	46	45	8.4	5.38	7.55e-19	8.06	1.45e-25
chr15-22	chr15	41069080	41069206	+	8.64	0.718	44	45	1.9	24.22	1.73e-45	13.15	3.24e-34
chr15-19	chr15	69702756	69702882	+	8.64	0.785	45	45	5.6	8.07	1.36e-25	13.51	1.06e-34
chr15-17	chr15	86037748	86037874	+	8.64	0.81	47	46	8.4	5.5	1.37e-19	18.13	4.36e-40
chr16-53	chr16	1346980	1347106	+	8.64	0.757	47	47	0.9	50.6	4.78e-62	13.46	1.25e-34
chr16-54	chr16	1393001	1393127	+	8.64	0.612	47	46	0.9	49.52	2.42e-60	10.43	1.98e-29
chr16-68	chr16	67345818	67345944	+	8.64	0.663	45	45	4.6	9.69	9.21e-29	8.62	1.03e-26
chr17-157	chr17	2907654	2907780	+	8.64	0.753	45	45	3.7	12.11	9.93e-33	7.62	1.32e-24
chr17-120	chr17	15602944	15603070	+	8.64	0.704	49	46	5.6	8.25	1.64e-26	19.12	4.51e-41
chr17-158	chr17	27907406	27907532	+	8.64	0.68	45	45	5.6	8.07	1.36e-25	8.1	1.21e-25
chr17-114	chr17	36600496	36600622	+	8.64	0.762	50	45	4.6	9.69	9.21e-29	8.37	3.27e-26
chr17-147	chr17	37320922	37321048	+	8.64	0.781	46	46	8.4	5.5	1.37e-19	9.25	5.85e-28
chr17-142	chr17	37557902	37558028	+	8.64	0.803	47	45	7.4	6.06	9.32e-21	13.56	9.06e-35
chr17-176	chr17	48450287	48450413	+	8.64	0.636	44	46	2.8	16.51	3.55e-39	9.04	1.51e-27
chr17-154	chr17	49230890	49231016	+	8.64	0.617	46	46	3.7	12.38	8.01e-34	8.97	2.05e-27
chr17-137	chr17	55520674	55520800	+	8.64	0.76	48	45	4.6	9.69	9.21e-29	6.59	3.76e-22
chr17-178	chr17	66395219	66395345	+	8.64	0.803	44	45	2.8	16.15	5.87e-38	12.27	5.69e-33
chr17-141	chr17	70358154	70358280	+	8.64	0.644	48	45	4.6	9.69	9.21e-29	4.96	1.47e-17
chr17-179	chr17	76588548	76588674	+	8.64	0.667	44	45	6.5	6.92	5.66e-23	9.28	5.26e-28
chr17-166	chr17	80250661	80250787	+	8.64	0.754	45	45	1.9	24.22	1.73e-45	7.15	1.56e-23
chr18-45	chr18	9849669	9849795	+	8.64	0.658	47	46	3.7	12.38	8.01e-34	11.14	3.09e-31
chr18-47	chr18	33952978	33953104	+	8.64	0.582	45	45	5.6	8.07	1.36e-25	11.43	1.07e-31
chr19-244	chr19	6812070	6812196	+	8.64	0.825	45	45	6.5	6.92	5.66e-23	9.16	8.93e-28
chr19-274	chr19	6863586	6863712	+	8.64	0.731	43	45	4.6	9.69	9.21e-29	7.13	5.55e-23
chr19-293	chr19	8204576	8204702	+	8.64	0.778	42	45	1.9	24.22	1.73e-45	6.81	1.08e-22
chr19-246	chr19	11849763	11849889	+	8.64	0.711	45	45	9.3	4.84	3.5e-17	11.43	1.07e-31
chr19-232	chr19	14587577	14587703	+	8.64	0.578	46	45	9.3	4.84	3.5e-17	4.44	1.65e-15
chr19-250	chr19	16296081	16296207	+	8.64	0.711	45	45	9.3	4.84	3.5e-17	5.56	2.25e-19
chr19-268	chr19	17459744	17459870	+	8.64	0.68	44	45	8.4	5.38	7.55e-19	4.37	1.38e-15
chr19-253	chr19	34850164	34850290	+	8.64	0.683	45	45	4.6	9.69	9.21e-29	8.68	7.63e-27
chr19-207	chr19	39109778	39109904	+	8.64	0.618	48	45	5.6	8.07	1.36e-25	9.11	1.1e-27
chr19-223	chr19	41221680	41221806	+	8.64	0.642	47	45	2.8	16.15	5.87e-38	5.45	1.19e-18
chr19-255	chr19	41735398	41735524	+	8.64	0.81	45	45	8.4	5.38	7.55e-19	7.02	3.17e-23
chr19-238	chr19	45542716	45542842	+	8.64	0.659	46	45	2.8	16.15	5.87e-38	7.91	2.99e-25
chr19-259	chr19	46296017	46296143	+	8.64	0.74	45	45	4.6	9.69	9.21e-29	7.91	2.99e-25
chr19-198	chr19	54704630	54704756	+	8.64	0.797	49	45	3.7	12.11	9.93e-33	10.51	3.43e-30
chr19-240	chr19	59084063	59084189	+	8.64	0.75	46	45	2.8	16.15	5.87e-38	5.68	1.03e-19
chr20-101	chr20	4206641	4206767	+	8.64	0.773	48	47	6.5	7.23	1.1e-24	7.34	1.8e-23
chr20-112	chr20	6058149	6058275	+	8.64	0.79	46	46	6.5	7.07	7.97e-24	10.63	2.09e-30
chr20-114	chr20	33495624	33495750	+	8.64	0.566	46	45	4.6	9.69	9.21e-29	7.22	1.04e-22
chr20-123	chr20	34490079	34490205	+	8.64	0.753	45	45	2.8	16.15	5.87e-38	9.23	6.5e-28
chr20-107	chr20	37055739	37055865	+	8.64	0.781	47	45	3.7	12.11	9.93e-33	5.11	4.91e-18
chr20-125	chr20	44534334	44534460	+	8.64	0.72	45	45	4.6	9.69	9.21e-29	7.99	2.09e-25
chr20-116	chr20	44622139	44622265	+	8.64	0.73	46	45	10.2	4.4	1.03e-15	9.23	6.5e-28
chr20-117	chr20	45583196	45583322	+	8.64	0.577	46	45	7.4	6.06	9.32e-21	8.01	6.26e-25
chr20-104	chr20	57586257	57586383	+	8.64	0.734	48	47	4.6	10.12	9.14e-31	8.34	1.3e-25
chr20-147	chr20	58824763	58824889	+	8.64	0.714	43	45	4.6	9.69	9.21e-29	8.07	4.77e-25
chr22-10	chr22	21910430	21910556	+	8.64	0.602	45	45	6.5	6.92	5.66e-23	16.98	6.95e-39
[truncated: 44,035 more rows]

## Sheet: SCIRT peaks rep#2
# HOMER Peaks
# Peak finding parameters:
# tag directory = ChartAS2/
#
# total peaks = 38045
# peak size = 143
# peaks found using tags on both strands
# minimum distance between peaks = 286
# fragment length = 142
# genome size = 2000000000
# Total tags = 42850699.0
# Total tags in peaks = 787322.0
# Approximate IP efficiency = 1.84%
# tags per bp = 0.020428
# expected tags per peak = 2.921
# maximum tags considered per bp = 2.0
# effective number of tags used for normalization = 10000000.0
# Peaks have been centered at maximum tag pile-up
# FDR rate threshold = 0.001000000
# FDR effective poisson threshold = 2.519851e-06
# FDR tag threshold = 14.0
# number of putative peaks = 88852
#
# input tag directory = Input/
# Fold over input required = 4.00
# Poisson p-value over input required = 1.00e-04
# Putative peaks filtered by input = 35881
#
# size of region used for local filtering = 10000
# Fold over local region required = 4.00
# Poisson p-value over local region required = 1.00e-04
# Putative peaks filtered by local signal = 14891
#
# Maximum fold under expected unique positions for tags = 2.00
# Putative peaks filtered for being too clonal = 35
#
# cmd = findPeaks ChartAS2/ -style factor -o auto -i Input/
#
# Column Headers:
#PeakID	chr	start	end	strand	Normalized Tag Count	focus ratio	findPeaks Score	Total Tags	Control Tags (normalized to IP Experiment)	Fold Change vs Control	p-value vs Control	Fold Change vs Local	p-value vs Local
chr7-1	chr7	61969296	61969438	+	4097.2	0.592	442	17619	4135	4.26	0	17.66	0
chr1-3	chr1	569856	569998	+	1469.5	0.999	196	6297	840.8	7.49	0	172.11	0
chr4-1	chr4	68265513	68265655	+	848.5	0.979	192	3646	720.8	5.06	0	104.65	0
chr16-1	chr16	1075334	1075476	+	58.1	0.701	187	250	35.9	6.96	6.31e-120	57.21	0
chr5-9	chr5	46384391	46384533	+	32.7	0.911	84	140	27.5	5.09	3.6e-52	21.4	1.81e-130
chr19-9	chr19	18633350	18633492	+	31.5	0.72	126	136	9.9	13.69	5.97e-102	16.85	5.66e-111
chr6-8	chr6	30585180	30585322	+	28.7	0.731	118	125	10.7	11.68	6.2e-86	19.67	8.07e-109
chr19-12	chr19	46234302	46234444	+	28	0.741	109	121	4.6	26.38	1.41e-123	19.91	1.21e-107
chr6-11	chr6	41545626	41545768	+	27.3	0.731	112	117	9.2	12.76	1.15e-84	6.03	5.63e-51
chr6-12	chr6	42165900	42166042	+	27.3	0.708	112	117	14.5	8.06	1.29e-63	9.4	1.47e-70
chr6-10	chr6	42167851	42167993	+	26.6	0.828	113	116	4.6	25.29	1.66e-116	9.27	3.63e-68
chr3-1	chr3	172468432	172468574	+	26.4	0.754	109	113	4.6	24.64	2.63e-112	23.53	3.85e-110
chr12-3	chr12	95034478	95034620	+	26.4	0.683	111	114	11.5	9.94	2.69e-71	16.64	5.33e-94
chr12-5	chr12	95467426	95467568	+	26.4	0.763	103	115	7.6	15.05	6.62e-91	20.55	8.53e-104
chr6-13	chr6	71122858	71123000	+	25.7	0.793	101	110	5.4	20.56	4.15e-101	27.67	1.04e-114
chr8-3	chr8	123671457	123671599	+	25.7	0.733	112	112	6.1	18.32	1.4e-97	21.85	6.99e-104
chr12-4	chr12	110939906	110940048	+	25.2	0.762	107	108	6.9	15.7	2.35e-87	19.83	4.97e-95
chr11-2	chr11	1093361	1093503	+	24.3	0.719	97	104	26	4	9.1e-31	15.12	1.31e-82
chr2-26	chr2	10418543	10418685	+	24	0.667	102	103	5.4	19.25	5.32e-92	15.14	7.13e-82
chr6-15	chr6	40904500	40904642	+	24	0.616	97	103	7.6	13.48	4.96e-77	8.78	1.32e-59
chr1-19	chr1	151138291	151138433	+	23.3	0.768	97	100	3.1	32.71	1.78e-111	16.89	3.47e-83
chr5-10	chr5	49434896	49435038	+	23.3	0.816	78	100	21.4	4.67	7.63e-35	7.81	1.91e-53
chr5-11	chr5	180472987	180473129	+	23.1	0.757	76	99	10.7	9.25	2.2e-59	23.21	3.63e-96
chr6-14	chr6	26104051	26104193	+	23.1	0.759	97	99	7.6	12.95	1.55e-72	21.8	1.36e-93
chr6-16	chr6	41546078	41546220	+	22.9	0.672	97	99	10.7	9.25	2.2e-59	4.84	2.29e-34
chr6-18	chr6	36562020	36562162	+	22.6	0.773	93	97	11.5	8.46	7.09e-55	9.98	4.41e-61
chr6-24	chr6	167846532	167846674	+	21.9	0.733	81	95	7.6	12.43	4.11e-68	18.84	2.79e-83
chr6-22	chr6	169825754	169825896	+	21.9	0.579	85	94	5.4	17.57	1.36e-80	15.87	6.93e-76
chr19-17	chr19	17377905	17378047	+	21.9	0.686	91	94	7.6	12.3	5.11e-67	11.39	8.32e-63
chr3-2	chr3	37034672	37034814	+	21.7	0.792	89	93	8.4	11.06	2.09e-62	19.37	1.76e-83
chr6-19	chr6	42532997	42533139	+	21.7	0.723	93	93	11.5	8.11	3.43e-51	10.13	1.44e-58
chr20-6	chr20	42568087	42568229	+	21.7	0.74	93	93	3.8	24.34	2.78e-92	10.18	3.88e-58
chr19-18	chr19	17448209	17448351	+	21.5	0.706	90	92	9.9	9.26	2.42e-55	11.72	7.17e-64
chr6-17	chr6	43979905	43980047	+	21.2	0.669	95	92	6.1	15.05	4.22e-73	8.98	4.18e-53
chr19-13	chr19	16441312	16441454	+	21.2	0.665	95	92	6.9	13.37	1.01e-68	9.91	3.62e-57
chr19-15	chr19	47931501	47931643	+	21.2	0.733	93	94	4.6	20.5	1.47e-86	12.69	2.31e-65
chr20-7	chr20	34472111	34472253	+	21.2	0.621	91	91	6.9	13.23	1.35e-67	13.6	6.88e-68
chr6-20	chr6	42099452	42099594	+	21	0.663	92	91	13.8	6.61	3.74e-43	10.05	4.51e-57
chr17-12	chr17	70059	70201	+	21	0.838	81	90	9.2	9.81	3.25e-56	17.18	1.99e-76
chr19-20	chr19	18157081	18157223	+	21	0.732	88	90	6.1	14.72	9.46e-71	10.69	1.36e-58
chr1-22	chr1	32860211	32860353	+	20.8	0.605	88	89	2.3	38.81	7.47e-106	12.46	2.64e-63
chr8-11	chr8	116235294	116235436	+	20.8	0.767	80	90	2.3	39.25	1.9e-107	17.83	5.96e-77
chr6-23	chr6	37105355	37105497	+	20.5	0.757	81	88	12.2	7.2	1.5e-44	7.89	1.34e-47
chr8-12	chr8	129603651	129603793	+	20.5	0.78	79	88	3.1	28.78	1.35e-93	19.69	1.06e-79
chr6-21	chr6	32812461	32812603	+	20.1	0.755	85	87	6.9	12.65	3.88e-63	10.52	1.65e-55
chr8-9	chr8	122736996	122737138	+	20.1	0.692	86	87	9.9	8.76	1.48e-50	12.89	4.43e-63
chr11-3	chr11	1212809	1212951	+	20.1	0.816	88	86	19.1	4.5	4.07e-29	26.82	5.68e-89
chr11-4	chr11	82968959	82969101	+	20.1	0.723	84	86	4.6	18.75	3.39e-76	21.71	2.1e-81
chr20-10	chr20	34129654	34129796	+	20.1	0.826	81	86	3.1	28.13	1.1e-90	16.2	4.93e-71
chr4-4	chr4	40297342	40297484	+	19.6	0.555	83	86	11.5	7.5	6.36e-45	11.87	3.23e-58
chr1-23	chr1	33565179	33565321	+	19.4	0.645	85	83	3.8	21.72	1.23e-78	14.98	5.62e-66
chr9-8	chr9	131674861	131675003	+	19.4	0.756	82	83	4.6	18.1	2.16e-72	12.36	1.51e-59
chr19-22	chr19	6737779	6737921	+	19.4	0.712	84	84	5.4	15.7	2.33e-68	11.89	2.76e-58
chr19-23	chr19	7571527	7571669	+	19.4	0.811	84	83	3.1	27.15	2.37e-86	13	3.05e-61
chr19-25	chr19	36236353	36236495	+	19.4	0.821	82	83	3.1	27.15	2.37e-86	14.2	3.54e-64
chr20-9	chr20	47132801	47132943	+	19.4	0.653	83	83	14.5	5.72	4.24e-35	6.99	3.07e-41
chr8-10	chr8	117436181	117436323	+	19.1	0.721	84	82	6.1	13.41	1.52e-61	17.77	6.22e-71
chr14-2	chr14	67654059	67654201	+	19.1	0.708	85	83	3.1	27.15	2.37e-86	12.88	3.34e-60
chr1-25	chr1	43824514	43824656	+	18.9	0.687	80	81	3.1	26.49	1.73e-83	14.46	2.74e-63
chr3-3	chr3	197121688	197121830	+	18.9	0.742	80	81	3.1	26.49	1.73e-83	15.28	2.68e-64
chr17-16	chr17	28256604	28256746	+	18.9	0.748	76	81	1.5	52.99	3.24e-107	17.56	1.11e-69
chr1-24	chr1	59249719	59249861	+	18.7	0.771	83	80	5.4	14.95	1.32e-63	17.85	2.22e-69
chr14-3	chr14	25166423	25166565	+	18.7	0.715	81	80	3.1	26.17	4.58e-82	10.63	1.14e-52
chr14-5	chr14	55136461	55136603	+	18.7	0.727	77	80	8.4	9.52	3.27e-49	11.01	8.79e-54
chr20-11	chr20	62324853	62324995	+	18.7	0.744	78	80	16.8	4.76	9.98e-29	14.29	2.18e-61
chr4-7	chr4	124476769	124476911	+	18.2	0.759	79	78	3.8	20.41	5.29e-72	14.8	3.38e-60
chr6-34	chr6	34511318	34511460	+	18.2	0.729	74	79	5.4	14.77	1.98e-62	11.56	2.44e-53
chr19-26	chr19	39881722	39881864	+	18.2	0.669	81	80	5.4	14.95	1.32e-63	13.14	2.89e-57
chr3-5	chr3	189052437	189052579	+	18	0.772	74	77	1.5	50.37	2.37e-100	18.49	5.66e-68
chr6-27	chr6	36952647	36952789	+	18	0.544	77	77	16.8	4.58	1.05e-26	5.07	1.94e-29
chr6-26	chr6	44017029	44017171	+	18	0.777	79	77	7.6	10.07	3.77e-49	7.63	6.86e-41
chr17-15	chr17	42853187	42853329	+	18	0.75	78	78	3.8	20.41	5.29e-72	14	3.02e-59
chr17-21	chr17	62988585	62988727	+	18	0.756	72	77	3.1	25.19	7.92e-78	17.07	1.95e-65
chr6-25	chr6	14711570	14711712	+	17.7	0.655	80	76	0.8	99.43	3.32e-121	7.33	9.11e-39
chr19-29	chr19	40931937	40932079	+	17.7	0.764	75	76	2.3	33.14	1.36e-85	11.62	8.32e-53
chr21-8	chr21	46786851	46786993	+	17.7	0.726	73	76	4.6	16.57	1.07e-63	17.82	5.92e-66
chrX-25	chrX	58546907	58547049	+	17.7	0.86	45	76	11.5	6.63	2.13e-36	17.58	1.56e-65
chr1-28	chr1	145059092	145059234	+	17.5	0.64	75	75	16.1	4.67	1.41e-26	6.94	3.23e-37
chr4-9	chr4	170146720	170146862	+	17.5	0.781	75	75	6.9	10.9	2.97e-50	35.17	2.29e-86
chr6-32	chr6	42306387	42306529	+	17.5	0.711	75	76	9.2	8.29	8.77e-43	7.21	2.72e-38
chr6-33	chr6	44026284	44026426	+	17.5	0.66	75	78	6.9	11.34	2.11e-53	7.9	6.77e-41
chr11-6	chr11	59383698	59383840	+	17.5	0.692	78	75	5.4	14.02	8.74e-58	17.41	2.17e-64
chr12-10	chr12	49463382	49463524	+	17.5	0.847	70	75	5.4	14.02	8.74e-58	23.82	4.08e-74
chr12-7	chr12	92987872	92988014	+	17.5	0.766	72	75	6.9	10.9	2.97e-50	13.6	3.86e-56
chr17-18	chr17	65418218	65418360	+	17.5	0.733	74	76	3.1	24.86	2e-76	17.95	2.45e-65
chr12-8	chr12	122356359	122356501	+	17.3	0.741	71	74	2.3	32.27	1.47e-82	14.21	1.93e-57
chr19-27	chr19	39921527	39921669	+	17.3	0.733	78	74	2.3	32.27	1.47e-82	11.68	2.83e-50
chr19-31	chr19	55973159	55973301	+	17.3	0.728	73	74	5.4	13.83	1.23e-56	15.18	1.99e-59
chr5-12	chr5	1522229	1522371	+	17	0.78	73	75	6.1	12.27	9.2e-54	19.35	6.66e-66
chr5-13	chr5	133772208	133772350	+	17	0.684	72	73	4.6	15.92	4.68e-60	13.14	2.19e-54
chr5-14	chr5	178980978	178981120	+	17	0.895	72	73	6.9	10.61	3.5e-48	18.85	4.19e-65
chr6-29	chr6	4576102	4576244	+	17	0.684	76	74	6.1	12.1	1.13e-52	16.44	5.04e-61
chr6-30	chr6	41814596	41814738	+	17	0.742	76	73	8.4	8.68	1.78e-42	10.04	1.33e-46
chr14-6	chr14	54391540	54391682	+	17	0.662	76	73	4.6	15.92	4.68e-60	12.15	4.12e-52
chr20-13	chr20	32581309	32581451	+	17	0.65	75	73	3.8	19.1	1.65e-65	9.85	4.86e-46
chr6-37	chr6	37786807	37786949	+	16.8	0.699	69	72	6.9	10.47	3.71e-47	7.62	7.82e-38
chr6-39	chr6	42952043	42952185	+	16.8	0.592	69	73	11.5	6.37	5.99e-34	5.8	1.19e-30
chr6-41	chr6	43737364	43737506	+	16.8	0.755	69	72	5.4	13.46	2.32e-54	8.83	7.82e-42
chr7-12	chr7	151290031	151290173	+	16.8	0.766	75	72	5.4	13.46	2.32e-54	17.8	7.21e-61
chr8-14	chr8	130704646	130704788	+	16.8	0.756	73	73	9.9	7.35	7.84e-38	11.76	1.78e-50
chr9-11	chr9	129567116	129567258	+	16.8	0.786	70	73	7.6	9.55	3.6e-45	15.96	2.48e-59
chr19-33	chr19	45256668	45256810	+	16.8	0.746	71	73	3.8	19.1	1.65e-65	12.13	2.25e-51
chr6-35	chr6	33256989	33257131	+	16.6	0.738	70	71	15.3	4.64	4.17e-25	9.77	5.34e-44
chr7-16	chr7	157197812	157197954	+	16.6	0.689	68	71	4.6	15.48	1.17e-57	13.86	1.75e-54
chr8-17	chr8	116439859	116440001	+	16.6	0.762	68	72	5.4	13.46	2.32e-54	21.19	8.41e-67
chr11-8	chr11	76155682	76155824	+	16.6	0.8	73	72	6.9	10.47	3.71e-47	20.07	2.01e-63
chr14-7	chr14	51865773	51865915	+	16.6	0.659	72	71	6.1	11.61	1.93e-49	10.69	4.18e-47
chr17-22	chr17	43225722	43225864	+	16.6	0.638	71	71	4.6	15.48	1.17e-57	14.19	3.86e-55
chr19-30	chr19	8590679	8590821	+	16.6	0.667	73	71	6.9	10.32	3.89e-46	8.25	5.61e-40
chr19-34	chr19	11205792	11205934	+	16.6	0.706	69	71	4.6	15.48	1.17e-57	7.6	3.21e-36
chr19-32	chr19	12847751	12847893	+	16.6	0.722	72	72	6.9	10.47	3.71e-47	11.8	3.27e-49
chr6-38	chr6	42283768	42283910	+	16.3	0.589	69	70	15.3	4.58	1.95e-24	5.38	2.31e-28
chr8-15	chr8	145022676	145022818	+	16.3	0.68	70	70	8.4	8.33	1.13e-39	8.85	2.5e-41
chr11-13	chr11	130036471	130036613	+	16.3	0.714	68	70	5.4	13.08	4.15e-52	12.52	3.66e-50
chr12-11	chr12	109125899	109126041	+	16.3	0.728	70	70	6.1	11.45	2.24e-48	9.81	4.14e-44
chr14-8	chr14	65569193	65569335	+	16.3	0.849	72	70	6.1	11.45	2.24e-48	18.43	5.21e-61
chr16-13	chr16	69083160	69083302	+	16.3	0.77	69	70	2.3	30.53	1.47e-76	19.1	5.11e-62
chr17-23	chr17	41622020	41622162	+	16.3	0.769	70	70	3.1	22.9	3.86e-68	11.06	9.06e-47
chr19-28	chr19	38791468	38791610	+	16.3	0.683	77	71	6.9	10.32	3.89e-46	11.9	4.39e-48
chr19-40	chr19	50083799	50083941	+	16.3	0.838	67	70	4.6	15.26	1.82e-56	13.19	1.93e-49
chr6-60	chr6	31430790	31430932	+	16.1	0.819	63	69	6.9	10.03	4.1e-44	11.35	1.77e-47
chr6-43	chr6	33288238	33288380	+	16.1	0.701	68	69	4.6	15.05	2.77e-55	7.55	1.45e-36
chr6-56	chr6	48794635	48794777	+	16.1	0.694	64	69	3.1	22.57	8.84e-67	22.76	5.12e-67
chr12-12	chr12	124937992	124938134	+	16.1	0.698	70	69	8.4	8.21	9.4e-39	12.68	1.57e-50
chr14-9	chr14	69162185	69162327	+	16.1	0.633	72	70	6.1	11.45	2.24e-48	10.5	2.38e-45
chr17-24	chr17	76136527	76136669	+	16.1	0.642	70	69	9.2	7.52	1.79e-36	9.79	1.9e-43
chr20-14	chr20	33464020	33464162	+	16.1	0.692	67	69	9.2	7.52	1.79e-36	8.4	8e-39
chr4-11	chr4	106013699	106013841	+	15.9	0.74	69	68	4.6	14.83	4.18e-54	20.12	1.34e-62
chr19-36	chr19	17970474	17970616	+	15.9	0.774	69	69	5.4	12.9	5.44e-51	9.26	1.26e-39
chr1-34	chr1	28189757	28189899	+	15.6	0.79	67	67	3.8	17.53	6.52e-58	15.76	5.33e-55
chr1-35	chr1	153606909	153607051	+	15.6	0.74	67	67	3.8	17.53	6.52e-58	15.34	2.89e-54
chr2-58	chr2	28200900	28201042	+	15.6	0.724	65	67	3.1	21.91	4.45e-64	16.04	1.81e-55
chr2-55	chr2	101482676	101482818	+	15.6	0.694	67	67	2.3	29.22	4.02e-72	11.26	5.99e-46
chr4-13	chr4	7069815	7069957	+	15.6	0.738	66	68	4.6	14.83	4.18e-54	12.76	2.83e-49
chr6-69	chr6	21593831	21593973	+	15.6	0.639	61	67	9.9	6.74	1.01e-32	10.51	1.79e-43
chr6-53	chr6	33807928	33808070	+	15.6	0.718	65	67	6.9	9.74	4.08e-42	10.02	3.01e-42
chr6-44	chr6	44009604	44009746	+	15.6	0.721	68	67	4.6	14.61	6.2e-53	6.31	4.45e-31
chr9-10	chr9	139470811	139470953	+	15.6	0.822	71	68	3.1	22.24	2e-65	10.33	1.15e-43
chr10-28	chr10	101666330	101666472	+	15.6	0.804	66	67	6.1	10.96	3.24e-45	12.32	2.5e-48
chr17-19	chr17	28690838	28690980	+	15.6	0.723	73	67	6.9	9.74	4.08e-42	12.97	1.01e-49
chr17-25	chr17	79369130	79369272	+	15.6	0.761	68	68	6.1	11.12	2.91e-46	17.04	3.91e-57
chr18-18	chr18	19612449	19612591	+	15.6	0.718	69	69	6.1	11.28	2.57e-47	15.66	8.17e-55
chr19-37	chr19	18788942	18789084	+	15.6	0.683	68	67	12.2	5.48	1.17e-27	9.15	1.79e-40
chr2-76	chr2	133044183	133044325	+	15.4	0.845	57	66	13	5.08	1.66e-25	9.66	2.68e-41
chr6-50	chr6	30788134	30788276	+	15.4	0.717	65	66	7.6	8.64	1.97e-38	9.25	5.09e-39
chr6-51	chr6	31528374	31528516	+	15.4	0.784	65	66	6.1	10.79	3.55e-44	8.52	1.55e-37
chr6-66	chr6	42419244	42419386	+	15.4	0.645	62	66	7.6	8.64	1.97e-38	5.52	4.45e-27
chr8-23	chr8	102373156	102373298	+	15.4	0.709	62	66	6.1	10.79	3.55e-44	8.75	9.14e-39
chr8-19	chr8	121840036	121840178	+	15.4	0.843	66	66	9.2	7.2	7.36e-34	15.16	3.62e-53
chr8-18	chr8	131012297	131012439	+	15.4	0.786	67	66	13	5.08	1.66e-25	9.03	1.46e-39
chr10-29	chr10	13545862	13546004	+	15.4	0.698	63	66	6.9	9.59	3.98e-41	15.53	8.41e-54
chr11-11	chr11	61129765	61129907	+	15.4	0.884	69	66	5.4	12.34	1.12e-47	19.2	1.56e-59
chr12-14	chr12	113275439	113275581	+	15.4	0.823	69	66	5.4	12.34	1.12e-47	12.71	1.84e-48
chr19-35	chr19	17428331	17428473	+	15.4	0.688	69	66	5.4	12.34	1.12e-47	8.39	1.03e-37
chr19-41	chr19	54640748	54640890	+	15.4	0.73	67	66	5.4	12.34	1.12e-47	17.57	3.98e-57
chr20-18	chr20	30743021	30743163	+	15.4	0.721	64	66	6.1	10.79	3.55e-44	10	3.44e-42
chr20-15	chr20	36781212	36781354	+	15.4	0.718	67	66	2.3	28.78	1.17e-70	9.38	1.52e-40
chr20-16	chr20	52499807	52499949	+	15.4	0.686	67	66	6.1	10.79	3.55e-44	14.48	1.21e-49
chr20-17	chr20	56703014	56703156	+	15.4	0.685	67	68	7.6	8.9	2.51e-40	8.93	1.05e-38
chr6-57	chr6	1917931	1918073	+	15.2	0.791	63	65	6.9	9.45	3.83e-40	15.24	1.61e-52
chr6-52	chr6	32939692	32939834	+	15.2	0.705	65	65	5.4	12.15	1.38e-46	6.65	1.51e-30
chr6-55	chr6	36553422	36553564	+	15.2	0.76	64	66	10.7	6.17	4.3e-30	8.24	1.07e-36
chr6-40	chr6	43484729	43484871	+	15.2	0.736	69	67	1.5	43.83	1.36e-83	7.49	2.32e-34
chr8-20	chr8	143303712	143303854	+	15.2	0.701	66	65	6.1	10.63	3.84e-43	6.24	6.11e-30
chr11-15	chr11	27423342	27423484	+	15.2	0.634	64	65	4.6	14.17	1.31e-50	13.14	1.26e-48
chr12-15	chr12	118454384	118454526	+	15.2	0.768	66	65	9.2	7.09	5.31e-33	16.17	4.27e-54
chr14-10	chr14	73925373	73925515	+	15.2	0.699	66	65	6.9	9.45	3.83e-40	13.09	8.27e-48
chr17-32	chr17	78904096	78904238	+	15.2	0.556	63	65	9.9	6.54	4.55e-31	14.45	4.01e-51
chr19-38	chr19	16222473	16222615	+	15.2	0.646	67	66	8.4	7.85	5e-36	8.96	8.32e-39
chr19-39	chr19	16978161	16978303	+	15.2	0.736	67	65	8.4	7.73	3.94e-35	9.98	1.58e-41
chr1-37	chr1	28099505	28099647	+	14.9	0.822	65	64	3.1	20.93	4.48e-60	13.66	6.68e-49
chr1-39	chr1	235061778	235061920	+	14.9	0.682	64	64	3.1	20.93	4.48e-60	14.51	1.81e-50
chr3-6	chr3	57969550	57969692	+	14.9	0.622	64	64	4.6	13.96	1.85e-49	10.71	1.09e-42
chr3-7	chr3	170444520	170444662	+	14.9	0.713	64	64	3.1	20.93	4.48e-60	11.64	8.35e-45
chr5-36	chr5	83699681	83699823	+	14.9	0.851	51	64	3.8	16.75	3.37e-54	33.17	2.19e-72
chr6-45	chr6	40918977	40919119	+	14.9	0.656	67	64	7.6	8.37	1.45e-36	6.34	7.13e-30
chr9-14	chr9	72668824	72668966	+	14.9	0.776	62	64	6.1	10.47	4.09e-42	14.24	3.19e-49
chr12-19	chr12	110493428	110493570	+	14.9	0.738	63	65	2.3	28.35	3.38e-69	9.65	4.37e-40
chr12-16	chr12	124118249	124118391	+	14.9	0.8	64	64	7.6	8.37	1.45e-36	13.74	4.62e-49
chr16-18	chr16	48161000	48161142	+	14.9	0.69	65	64	2.3	27.91	9.59e-68	11.99	1.48e-45
chr17-31	chr17	73081806	73081948	+	14.9	0.717	63	64	4.6	13.96	1.85e-49	10.97	1.21e-42
chr19-42	chr19	55700763	55700905	+	14.9	0.603	66	65	3.1	21.26	2.11e-61	12.57	9.16e-47
chr1-38	chr1	42097762	42097904	+	14.7	0.777	64	63	6.1	10.3	4.28e-41	12.7	2.55e-46
chr2-61	chr2	101508423	101508565	+	14.7	0.675	64	63	6.1	10.3	4.28e-41	10.44	2.03e-41
chr5-16	chr5	52323979	52324121	+	14.7	0.764	63	63	3.8	16.49	5.64e-53	13.44	9.13e-48
chr6-59	chr6	30780872	30781014	+	14.7	0.738	63	63	10.7	5.89	9.71e-28	8.98	3.83e-37
chr6-72	chr6	35368770	35368912	+	14.7	0.625	61	63	10.7	5.89	9.71e-28	5.98	4.22e-28
chr6-73	chr6	42012077	42012219	+	14.7	0.672	61	63	7.6	8.24	1.22e-35	5.58	1.01e-25
chr6-62	chr6	42194740	42194882	+	14.7	0.745	63	63	5.4	11.78	2.02e-44	8.42	3.83e-36
chr6-54	chr6	44042446	44042588	+	14.7	0.689	65	63	8.4	7.49	2.33e-33	7.19	2.22e-32
chr6-49	chr6	47040990	47041132	+	14.7	0.705	66	64	2.3	27.91	9.59e-68	11.67	3.32e-44
chr8-22	chr8	102110790	102110932	+	14.7	0.629	63	63	3.8	16.49	5.64e-53	8.14	8.29e-35
chr11-18	chr11	96123078	96123220	+	14.7	0.731	62	63	4.6	13.74	2.59e-48	16.45	6.42e-53
chr11-16	chr11	107328564	107328706	+	14.7	0.828	64	63	3.1	20.61	9.39e-59	22.27	8.84e-61
chr14-12	chr14	101159562	101159704	+	14.7	0.613	64	63	3.8	16.49	5.64e-53	10.67	5.82e-42
chr19-64	chr19	42580172	42580314	+	14.7	0.682	56	63	1.5	41.21	4.58e-77	11.58	5.28e-44
chr19-49	chr19	45393666	45393808	+	14.7	0.655	63	63	6.1	10.3	4.28e-41	11.43	1.13e-43
chr1-40	chr1	55909290	55909432	+	14.5	0.717	62	62	5.4	11.59	2.38e-43	16.11	8.9e-51
chr3-8	chr3	48754647	48754789	+	14.5	0.768	62	62	3.8	16.22	9.31e-52	13.19	1.47e-46
chr5-17	chr5	173141780	173141922	+	14.5	0.697	63	62	2.3	27.04	7.36e-65	12.37	2.92e-44
chr6-58	chr6	3978620	3978762	+	14.5	0.76	63	62	8.4	7.37	1.75e-32	11.55	1.33e-42
chr6-70	chr6	30712325	30712467	+	14.5	0.667	61	63	8.4	7.49	2.33e-33	4.37	1.49e-20
chr6-71	chr6	30715247	30715389	+	14.5	0.736	61	63	6.9	9.16	3.38e-38	4.67	6.54e-22
chr6-61	chr6	35453242	35453384	+	14.5	0.672	63	62	9.2	6.76	1.82e-30	4.88	7.23e-23
chr11-19	chr11	122954362	122954504	+	14.5	0.651	62	62	3.8	16.22	9.31e-52	14.94	1.1e-49
chr14-18	chr14	55544478	55544620	+	14.5	0.728	59	62	3.8	16.22	9.31e-52	6.4	3.31e-29
chr14-14	chr14	75491913	75492055	+	14.5	0.768	63	62	3.8	16.22	9.31e-52	12.55	1.27e-44
chr19-53	chr19	6424919	6425061	+	14.5	0.6	61	64	6.1	10.47	4.09e-42	8.74	2.18e-35
chr19-45	chr19	11485584	11485726	+	14.5	0.67	64	62	10.7	5.79	5.74e-27	7.02	2.49e-31
chr19-44	chr19	13096232	13096374	+	14.5	0.649	65	62	9.2	6.76	1.82e-30	6.98	9.55e-31
chr19-50	chr19	47616422	47616564	+	14.5	0.782	63	62	4.6	13.52	3.56e-47	16.44	4.34e-52
chr19-46	chr19	51866283	51866425	+	14.5	0.86	64	62	2.3	27.04	7.36e-65	10.4	1.08e-40
chr1-36	chr1	55894795	55894937	+	14.2	0.634	66	61	5.4	11.4	2.76e-42	11.01	1.96e-41
chr1-42	chr1	224752970	224753112	+	14.2	0.688	61	62	4.6	13.52	3.56e-47	13.65	1.11e-46
chr4-15	chr4	83822206	83822348	+	14.2	0.706	62	61	3.1	19.95	3.93e-56	13.48	2.3e-46
chr5-21	chr5	135394384	135394526	+	14.2	0.742	58	61	1.5	39.9	7.66e-74	14.65	2.01e-48
chr6-64	chr6	2847065	2847207	+	14.2	0.73	62	61	11.5	5.32	1.06e-24	7.95	1.02e-33
chr8-28	chr8	130996640	130996782	+	14.2	0.693	60	61	4.6	13.3	4.82e-46	10.97	1.05e-40
chr9-17	chr9	73217500	73217642	+	14.2	0.758	58	61	2.3	26.6	1.99e-63	10.92	3.02e-41
chr17-33	chr17	70461797	70461939	+	14.2	0.678	59	64	7.6	8.37	1.45e-36	10.17	1.11e-37
chr19-43	chr19	10230513	10230655	+	14.2	0.818	65	61	4.6	13.3	4.82e-46	13.92	3.64e-47
chr19-51	chr19	17371798	17371940	+	14.2	0.689	62	61	6.1	9.98	4.49e-39	8.36	6.8e-35
chr1-44	chr1	11866116	11866258	+	14	0.685	59	60	5.4	11.21	3.15e-41	8.41	1.77e-34
chr4-17	chr4	1391347	1391489	+	14	0.938	57	60	8.4	7.14	9.4e-31	14.27	2.9e-46
chr5-18	chr5	92695409	92695551	+	14	0.713	62	61	3.8	15.96	1.51e-50	16.28	3.1e-50
chr5-23	chr5	170814581	170814723	+	14	0.745	57	60	4.6	13.08	6.42e-45	17.3	9.97e-52
chr6-68	chr6	1725015	1725157	+	14	0.777	61	60	5.4	11.21	3.15e-41	17.6	3.83e-52
chr6-76	chr6	16766523	16766665	+	14	0.78	60	60	7.6	7.85	6.53e-33	7.17	7.49e-31
chr6-86	chr6	32146071	32146213	+	14	0.72	58	60	6.9	8.72	2.49e-35	5.27	9.7e-24
chr6-82	chr6	36288412	36288554	+	14	0.703	59	60	9.2	6.54	8.22e-29	6.9	5.17e-30
chr6-74	chr6	42013539	42013681	+	14	0.633	61	60	11.5	5.23	5.66e-24	5.01	4.84e-23
chr6-75	chr6	42067596	42067738	+	14	0.709	61	60	10.7	5.61	1.91e-25	5.87	1.88e-26
chr8-26	chr8	142086270	142086412	+	14	0.628	61	61	5.4	11.4	2.76e-42	10.3	1.4e-38
chr9-15	chr9	37948135	37948277	+	14	0.708	60	61	6.9	8.87	2.8e-36	11.65	3.9e-42
chr10-33	chr10	75668895	75669037	+	14	0.743	59	60	6.1	9.81	4.49e-38	10.09	1.01e-38
chr10-34	chr10	96118368	96118510	+	14	0.734	59	60	4.6	13.08	6.42e-45	14.31	4.36e-47
chr12-21	chr12	91353468	91353610	+	14	0.75	60	60	5.4	11.21	3.15e-41	22.6	2.45e-58
chr12-20	chr12	121837816	121837958	+	14	0.787	61	60	9.9	6.04	4.73e-27	15.32	9.66e-49
chr17-34	chr17	71376	71518	+	14	0.795	58	60	7.6	7.85	6.53e-33	10.63	5.8e-40
chr17-29	chr17	47492246	47492388	+	14	0.732	64	60	5.4	11.21	3.15e-41	15.82	9.69e-49
chr20-19	chr20	33113722	33113864	+	14	0.632	61	60	6.1	9.81	4.49e-38	8.71	2.73e-35
chr20-21	chr20	48388953	48389095	+	14	0.817	60	60	5.4	11.21	3.15e-41	8.69	1.1e-34
chr2-68	chr2	45864636	45864778	+	13.8	0.816	60	59	6.1	9.65	4.41e-37	13.93	6.05e-45
chr2-69	chr2	69902645	69902787	+	13.8	0.685	60	59	3.1	19.3	1.54e-53	15.76	1.2e-48
chr4-16	chr4	190656245	190656387	+	13.8	0.664	61	59	5.4	11.03	3.54e-40	5.74	1.56e-25
chr5-19	chr5	141595588	141595730	+	13.8	0.75	61	59	1.5	38.6	1.2e-70	12.44	5.32e-43
chr6-67	chr6	1325831	1325973	+	13.8	0.647	61	60	6.1	9.81	4.49e-38	6.65	1.06e-28
chr6-79	chr6	2988854	2988996	+	13.8	0.628	59	59	7.6	7.72	5.14e-32	6.67	8.96e-29
chr6-65	chr6	20516600	20516742	+	13.8	0.717	62	62	9.2	6.76	1.82e-30	9.16	6.91e-36
chr6-77	chr6	30910569	30910711	+	13.8	0.73	60	59	10.7	5.51	1.07e-24	8.49	3.69e-34
chr6-48	chr6	31633621	31633763	+	13.8	0.718	66	60	3.8	15.7	2.42e-49	8.22	2.04e-33
chr6-95	chr6	36395599	36395741	+	13.8	0.682	55	59	5.4	11.03	3.54e-40	7.52	2.01e-31
chr6-85	chr6	42325544	42325686	+	13.8	0.606	59	59	6.9	8.58	2.17e-34	8.47	4.11e-34
chr6-99	chr6	47156307	47156449	+	13.8	0.825	55	59	4.6	12.87	8.42e-44	18	7.67e-52
chr7-22	chr7	123410605	123410747	+	13.8	0.8	61	59	0.4	154.38	1.11e-105	17.23	8.56e-51
chr8-27	chr8	128961943	128962085	+	13.8	0.676	60	59	6.9	8.58	2.17e-34	10.76	1.33e-39
chr11-20	chr11	64008778	64008920	+	13.8	0.71	59	59	1.5	38.6	1.2e-70	8.4	2.28e-33
chr12-17	chr12	94965369	94965511	+	13.8	0.717	63	59	6.9	8.58	2.17e-34	8.58	2.13e-34
chr14-15	chr14	71610021	71610163	+	13.8	0.622	60	59	6.9	8.58	2.17e-34	7.66	2.49e-31
chr14-21	chr14	93192537	93192679	+	13.8	0.66	56	59	3.8	15.44	3.8e-48	10.12	3.57e-38
chr17-35	chr17	7379934	7380076	+	13.8	0.785	58	59	4.6	12.87	8.42e-44	11.42	2.46e-40
chr19-54	chr19	13991076	13991218	+	13.8	0.649	60	59	7.6	7.72	5.14e-32	7.73	4.73e-32
chr22-3	chr22	38636967	38637109	+	13.8	0.779	58	59	3.8	15.44	3.8e-48	15.35	5.28e-48
chr1-45	chr1	110363875	110364017	+	13.5	0.643	59	58	11.5	5.06	1.54e-22	7.64	2.75e-31
chr1-68	chr1	202173630	202173772	+	13.5	0.722	53	58	7.6	7.59	3.98e-31	9.02	5.64e-35
chr2-70	chr2	220363467	220363609	+	13.5	0.69	60	58	6.1	9.49	4.27e-36	12.74	1.92e-41
chr6-84	chr6	37467633	37467775	+	13.5	0.725	59	58	10.7	5.42	5.94e-24	8	9.07e-32
chr9-16	chr9	140339791	140339933	+	13.5	0.713	60	58	3.8	15.18	5.87e-47	14.28	1.6e-45
chr10-35	chr10	33404683	33404825	+	13.5	0.837	58	58	5.4	10.84	3.91e-39	18.68	6.92e-52
chr11-26	chr11	1092794	1092936	+	13.5	0.648	55	58	13	4.46	4.89e-20	6.96	2.45e-27
chr11-22	chr11	65186291	65186433	+	13.5	0.72	58	58	3.8	15.18	5.87e-47	6.98	7.95e-29
chr12-30	chr12	121826297	121826439	+	13.5	0.725	56	58	4.6	12.65	1.08e-42	12.23	6.62e-42
chr14-19	chr14	21979481	21979623	+	13.5	0.69	57	58	3.1	18.97	2.98e-52	13.24	9.38e-44
chr14-17	chr14	52805152	52805294	+	13.5	0.734	59	58	6.1	9.49	4.27e-36	7.75	1.39e-31
chr14-16	chr14	73493910	73494052	+	13.5	0.741	60	58	4.6	12.65	1.08e-42	13.84	2.66e-43
chr17-30	chr17	56267330	56267472	+	13.5	0.737	64	59	2.3	25.73	1.39e-60	12.02	8.11e-41
chr22-2	chr22	38694732	38694874	+	13.5	0.783	59	58	3.8	15.18	5.87e-47	13.46	3.83e-44
chrX-16	chrX	148621003	148621145	+	13.5	0.667	58	58	0.8	75.88	3.37e-86	19.79	2.89e-53
chr1-53	chr1	78002579	78002721	+	13.3	0.722	56	57	5.4	10.65	4.25e-38	10.37	1.74e-37
chr1-52	chr1	201521083	201521225	+	13.3	0.657	57	57	10.7	5.33	3.23e-23	12.59	6.91e-42
chr1-60	chr1	223963909	223964051	+	13.3	0.716	54	57	4.6	12.43	1.37e-41	12.63	5.83e-42
chr2-75	chr2	42329232	42329374	+	13.3	0.762	57	57	3.8	14.92	8.92e-46	11.19	3.26e-39
chr4-19	chr4	103749270	103749412	+	13.3	0.679	57	58	3.8	15.18	5.87e-47	12.1	2.73e-40
chr5-22	chr5	90628255	90628397	+	13.3	0.66	57	57	3.8	14.92	8.92e-46	13.36	1.66e-42
chr6-88	chr6	11188529	11188671	+	13.3	0.731	57	57	6.1	9.32	4.05e-35	11.06	2.73e-38
chr6-120	chr6	30231777	30231919	+	13.3	0.63	51	57	4.6	12.43	1.37e-41	7.75	4.5e-31
chr6-81	chr6	35265592	35265734	+	13.3	0.768	59	57	10.7	5.33	3.23e-23	6.09	5.76e-26
chr6-87	chr6	36985882	36986024	+	13.3	0.654	58	57	13.8	4.14	2.7e-18	4.83	2.84e-21
chr8-24	chr8	124428615	124428757	+	13.3	0.712	62	57	3.1	18.64	5.65e-51	9.29	4.87e-35
chr9-18	chr9	112578792	112578934	+	13.3	0.667	58	57	3.8	14.92	8.92e-46	10.1	6.66e-37
chr10-40	chr10	5593768	5593910	+	13.3	0.75	57	58	5.4	10.84	3.91e-39	7.66	2.61e-30
chr10-38	chr10	72091634	72091776	+	13.3	0.716	58	57	4.6	12.43	1.37e-41	9.7	5.28e-36
chr11-23	chr11	66185661	66185803	+	13.3	0.703	58	57	3.8	14.92	8.92e-46	11.29	2.09e-39
chr11-24	chr11	104540042	104540184	+	13.3	0.821	58	58	4.6	12.65	1.08e-42	14.24	1.06e-44
chr12-18	chr12	95377526	95377668	+	13.3	0.779	63	57	1.5	37.29	1.76e-67	11.73	1.33e-39
chr12-22	chr12	104249240	104249382	+	13.3	0.67	60	57	6.1	9.32	4.05e-35	5.48	2.19e-23
chr14-20	chr14	55538836	55538978	+	13.3	0.702	56	57	5.4	10.65	4.25e-38	8.13	3.99e-32
chr19-47	chr19	10491354	10491496	+	13.3	0.67	63	59	2.3	25.73	1.39e-60	9.03	2.02e-34
chr19-63	chr19	40949006	40949148	+	13.3	0.739	56	57	5.4	10.65	4.25e-38	9.58	9.89e-36
chr1-54	chr1	86016660	86016802	+	13.1	0.64	56	56	8.4	6.66	2.23e-27	10.66	1.76e-37
chr1-48	chr1	87692095	87692237	+	13.1	0.618	58	56	0.8	73.27	1.9e-82	11.63	2.13e-39
chr1-51	chr1	150601651	150601793	+	13.1	0.758	57	57	2.3	24.86	9.05e-58	11.45	4.57e-39
chr6-80	chr6	7058777	7058919	+	13.1	0.71	59	58	9.2	6.32	3.48e-27	8.11	1.59e-31
chr6-104	chr6	22236953	22237095	+	13.1	0.645	54	56	3.1	18.32	1.05e-49	9.75	1.66e-35
chr6-90	chr6	32145505	32145647	+	13.1	0.71	57	56	8.4	6.66	2.23e-27	5.07	7.57e-22
chr6-83	chr6	36987107	36987249	+	13.1	0.615	59	57	7.6	7.46	3.03e-30	4.28	1.31e-18
chr6-97	chr6	41944662	41944804	+	13.1	0.645	55	57	9.2	6.21	2.21e-26	7.17	6.24e-29
chr6-78	chr6	43692944	43693086	+	13.1	0.64	60	56	3.8	14.65	1.33e-44	6.96	2.8e-28
chr7-34	chr7	62015200	62015342	+	13.1	0.891	46	56	9.2	6.11	1.38e-25	13.94	1.83e-43
chr8-30	chr8	119023709	119023851	+	13.1	0.745	58	56	6.1	9.16	3.79e-34	8.3	5.01e-32
chr8-32	chr8	143304288	143304430	+	13.1	0.618	57	56	3.1	18.32	1.05e-49	5.29	1.08e-22
chr9-20	chr9	19380186	19380328	+	13.1	0.797	55	56	3.1	18.32	1.05e-49	27.08	9.01e-58
chr9-22	chr9	113422336	113422478	+	13.1	0.71	54	56	4.6	12.21	1.71e-40	22.71	1.12e-54
chr11-37	chr11	8588231	8588373	+	13.1	0.789	52	56	4.6	12.21	1.71e-40	22.44	2.1e-54
chr11-29	chr11	64667807	64667949	+	13.1	0.681	55	56	3.8	14.65	1.33e-44	12.25	1.43e-40
chr12-28	chr12	89769678	89769820	+	13.1	0.709	56	56	2.3	24.42	2.25e-56	8.41	9.46e-32
chr12-33	chr12	108959844	108959986	+	13.1	0.786	54	56	3.1	18.32	1.05e-49	10.43	5.35e-37
chr12-23	chr12	112563171	112563313	+	13.1	0.67	59	57	8.4	6.78	3.27e-28	8.52	1.37e-32
chr19-61	chr19	19174594	19174736	+	13.1	0.726	56	56	6.1	9.16	3.79e-34	12.66	2.7e-41
chr19-57	chr19	44172484	44172626	+	13.1	0.743	58	56	4.6	12.21	1.71e-40	6.98	2.35e-28
chr19-59	chr19	46000434	46000576	+	13.1	0.773	57	56	6.9	8.14	1.31e-31	13.31	1.98e-42
chr19-68	chr19	59084939	59085081	+	13.1	0.624	55	56	5.4	10.47	4.53e-37	8.04	2.39e-31
chr20-22	chr20	33759541	33759683	+	13.1	0.831	58	56	8.4	6.66	2.23e-27	10.11	1.09e-35
chr20-26	chr20	33906388	33906530	+	13.1	0.756	56	57	5.4	10.65	4.25e-38	9.04	7.26e-34
chr1-64	chr1	16840838	16840980	+	12.8	0.797	53	55	7.6	7.2	1.66e-28	13.07	2.65e-41
chr1-56	chr1	207200609	207200751	+	12.8	0.795	55	56	6.1	9.16	3.79e-34	12.75	4.88e-40
chr1-69	chr1	211765647	211765789	+	12.8	0.744	53	55	6.9	8	1.07e-30	13.21	1.56e-41
chr3-11	chr3	172340817	172340959	+	12.8	0.868	56	55	0.4	143.92	5.68e-97	14.87	3.69e-44
chr3-10	chr3	196006354	196006496	+	12.8	0.704	57	55	3.8	14.39	1.95e-43	14.93	3.01e-44
chr4-21	chr4	183499686	183499828	+	12.8	0.626	56	55	1.5	35.98	2.41e-64	21.42	2.13e-52
chr6-91	chr6	4402827	4402969	+	12.8	0.722	56	55	6.9	8	1.07e-30	9.45	1.21e-33
chr6-89	chr6	30035226	30035368	+	12.8	0.634	57	55	8.4	6.54	1.49e-26	7.05	4.49e-28
chr6-93	chr6	30293540	30293682	+	12.8	0.663	55	55	4.6	11.99	2.09e-39	8.22	2.74e-31
chr6-121	chr6	30853902	30854044	+	12.8	0.642	51	55	12.2	4.5	3.15e-19	6.35	5.94e-26
chr6-96	chr6	41938093	41938235	+	12.8	0.635	55	55	7.6	7.2	1.66e-28	6	5.73e-24
chr6-98	chr6	42897040	42897182	+	12.8	0.622	55	55	12.2	4.5	3.15e-19	6.05	5.75e-25
chr6-113	chr6	54200741	54200883	+	12.8	0.684	53	55	6.1	8.99	3.48e-33	15.01	1.35e-43
chr10-43	chr10	34999450	34999592	+	12.8	0.795	54	55	2.3	23.99	5.5e-55	14.58	9.99e-44
chr10-37	chr10	46983755	46983897	+	12.8	0.74	58	55	3.8	14.39	1.95e-43	7.63	1.03e-29
chr11-27	chr11	36475393	36475535	+	12.8	0.699	55	56	7.6	7.33	2.26e-29	9.53	2.07e-34
chr12-27	chr12	82752166	82752308	+	12.8	0.73	57	57	4.6	12.43	1.37e-41	14.42	1.8e-43
chr12-31	chr12	113659151	113659293	+	12.8	0.686	55	55	9.2	6	8.43e-25	9.55	1.83e-34
chr14-23	chr14	69014460	69014602	+	12.8	0.767	55	55	2.3	23.99	5.5e-55	7.36	5.63e-29
chr14-22	chr14	105219291	105219433	+	12.8	0.638	56	55	6.1	8.99	3.48e-33	9.34	5.53e-34
chr17-36	chr17	39656380	39656522	+	12.8	0.667	58	56	5.4	10.47	4.53e-37	9.14	1.63e-33
chr17-40	chr17	70359025	70359167	+	12.8	0.66	56	55	8.4	6.54	1.49e-26	7.57	1.51e-29
chr19-55	chr19	12884495	12884637	+	12.8	0.654	59	57	6.1	9.32	4.05e-35	5.62	1.68e-23
chr19-58	chr19	14530271	14530413	+	12.8	0.605	57	56	10.7	5.23	1.73e-22	7.43	1.14e-28
chr20-29	chr20	1396688	1396830	+	12.8	0.706	55	55	4.6	11.99	2.09e-39	10.56	1.24e-36
chr20-24	chr20	4206627	4206769	+	12.8	0.788	56	55	6.1	8.99	3.48e-33	10.59	1.08e-36
chr20-25	chr20	10521465	10521607	+	12.8	0.733	56	55	3.8	14.39	1.95e-43	17.47	8.85e-48
chr20-30	chr20	34330144	34330286	+	12.8	0.667	55	55	9.2	6	8.43e-25	9.15	5.83e-33
chr21-15	chr21	40297938	40298080	+	12.8	0.759	56	56	3.1	18.32	1.05e-49	22.7	8.91e-53
chr1-57	chr1	27718832	27718974	+	12.6	0.771	54	54	3.1	17.66	3.48e-47	11.01	6.84e-37
chr1-55	chr1	39564289	39564431	+	12.6	0.578	55	55	2.3	23.99	5.5e-55	10.84	6.54e-36
chr2-77	chr2	238409389	238409531	+	12.6	0.696	56	55	6.1	8.99	3.48e-33	11.86	8.38e-38
chr3-16	chr3	43749612	43749754	+	12.6	0.795	52	54	1.5	35.33	8.66e-63	18.07	1.09e-47
chr4-25	chr4	122627942	122628084	+	12.6	0.783	53	54	2.3	23.55	1.32e-53	14.15	2.6e-42
chr4-20	chr4	141188133	141188275	+	12.6	0.702	57	54	3.8	14.13	2.82e-42	12.43	8.69e-39
chr5-24	chr5	179125699	179125841	+	12.6	0.732	57	54	7.6	7.07	1.2e-27	11.56	6.26e-38
chr6-94	chr6	35722769	35722911	+	12.6	0.691	55	55	8.4	6.54	1.49e-26	5.47	1.32e-22
chr6-145	chr6	35923827	35923969	+	12.6	0.759	49	54	10.7	5.05	4.69e-21	6.72	1.23e-26
chr8-35	chr8	101635681	101635823	+	12.6	0.719	55	54	2.3	23.55	1.32e-53	10.26	9.14e-35
chr9-23	chr9	84174786	84174928	+	12.6	0.677	53	54	6.1	8.83	3.13e-32	11.21	1.32e-36
chr9-27	chr9	97545511	97545653	+	12.6	0.8	51	54	8.4	6.42	9.76e-26	16.91	2.11e-45
chr12-32	chr12	89746207	89746349	+	12.6	0.776	54	54	9.2	5.89	5.07e-24	12.12	5.89e-39
chr14-28	chr14	91527040	91527182	+	12.6	0.654	54	54	3.8	14.13	2.82e-42	8.24	8.86e-31
chr16-26	chr16	48192340	48192482	+	12.6	0.795	55	54	2.3	23.55	1.32e-53	17.15	1.55e-46
chr17-37	chr17	39844873	39845015	+	12.6	0.735	58	54	3.1	17.66	3.48e-47	17.48	6e-47
chr17-41	chr17	42634533	42634675	+	12.6	0.722	55	54	4.6	11.78	2.51e-38	9.57	6.54e-34
chr17-48	chr17	53870788	53870930	+	12.6	0.782	52	54	6.1	8.83	3.13e-32	25.67	1.51e-55
chr18-23	chr18	12402907	12403049	+	12.6	0.691	54	54	2.3	23.55	1.32e-53	10.06	2.32e-34
chr19-65	chr19	8420534	8420676	+	12.6	0.605	55	54	8.4	6.42	9.76e-26	6.47	6.81e-26
chr19-66	chr19	10946429	10946571	+	12.6	0.631	55	54	3.8	14.13	2.82e-42	9.09	2.98e-32
chr19-60	chr19	14587589	14587731	+	12.6	0.68	56	54	8.4	6.42	9.76e-26	7.44	1.04e-28
chr19-87	chr19	17331045	17331187	+	12.6	0.66	49	54	6.9	7.85	8.57e-30	8.58	4.58e-31
chr19-56	chr19	18314807	18314949	+	12.6	0.602	58	54	6.9	7.85	8.57e-30	8.38	3.78e-31
chr19-67	chr19	39936168	39936310	+	12.6	0.797	55	54	4.6	11.78	2.51e-38	7.63	3.33e-29
chr19-69	chr19	55851078	55851220	+	12.6	0.624	54	55	5.4	10.28	4.75e-36	10.34	1.51e-35
chr20-27	chr20	35699953	35700095	+	12.6	0.637	56	54	3.8	14.13	2.82e-42	12.58	9.61e-40
chr20-38	chr20	52684115	52684257	+	12.6	0.708	53	54	2.3	23.55	1.32e-53	11.56	2.91e-37
chr1-63	chr1	9271492	9271634	+	12.4	0.789	53	53	2.3	23.11	3.11e-52	12.14	2.74e-38
chr1-65	chr1	28562471	28562613	+	12.4	0.729	53	53	6.9	7.7	6.75e-29	12.45	4.03e-38
chr1-58	chr1	113247824	113247966	+	12.4	0.716	54	53	7.6	6.93	8.5e-27	10.09	2.03e-34
chr1-67	chr1	162511692	162511834	+	12.4	0.71	53	53	7.6	6.93	8.5e-27	10.59	2.02e-35
chr1-49	chr1	201987988	201988130	+	12.4	0.655	58	53	3.8	13.87	3.98e-41	8.83	4.29e-31
chr1-61	chr1	230240539	230240681	+	12.4	0.657	54	53	1.5	34.67	3.06e-61	9.66	2.63e-32
chr1-62	chr1	234908212	234908354	+	12.4	0.759	54	53	1.5	34.67	3.06e-61	10.18	1.37e-34
chr2-74	chr2	11694313	11694455	+	12.4	0.747	58	53	4.6	11.56	2.96e-37	14.34	4.41e-41
chr2-78	chr2	38209331	38209473	+	12.4	0.678	54	53	0.8	69.34	7.09e-77	18.83	9.72e-48
chr3-18	chr3	15687557	15687699	+	12.4	0.622	51	53	5.4	9.91	4.95e-34	10.81	7.55e-36
chr3-9	chr3	193807380	193807522	+	12.4	0.788	58	53	6.9	7.7	6.75e-29	13	9.52e-40
chr4-26	chr4	153656582	153656724	+	12.4	0.722	52	53	5.4	9.91	4.95e-34	13.03	4.39e-39
chr5-26	chr5	172879241	172879383	+	12.4	0.736	54	54	0.8	70.65	1e-78	9.54	3e-33
chr6-106	chr6	4459461	4459603	+	12.4	0.77	53	53	8.4	6.3	6.29e-25	11.24	1.14e-36
chr6-103	chr6	16769487	16769629	+	12.4	0.705	54	54	6.1	8.83	3.13e-32	7.16	1.93e-27
chr6-108	chr6	21381909	21382051	+	12.4	0.769	53	53	8.4	6.3	6.29e-25	9.69	1.41e-33
chr6-105	chr6	30614691	30614833	+	12.4	0.836	54	53	7.6	6.93	8.5e-27	11.6	2.5e-37
chr6-92	chr6	33217161	33217303	+	12.4	0.737	56	53	13	4.08	7.45e-17	7.79	4.06e-29
chr10-47	chr10	72288694	72288836	+	12.4	0.848	53	53	4.6	11.56	2.96e-37	13.89	3.68e-41
chr10-44	chr10	79110515	79110657	+	12.4	0.788	54	53	4.6	11.56	2.96e-37	16.76	3.34e-45
chr11-35	chr11	45939721	45939863	+	12.4	0.802	53	54	4.6	11.78	2.51e-38	10.07	9.4e-34
chr11-32	chr11	65239605	65239747	+	12.4	0.732	54	53	10.7	4.95	2.38e-20	10.87	5.67e-36
chr11-36	chr11	78285902	78286044	+	12.4	0.75	53	53	6.1	8.67	2.77e-31	11.42	5.36e-37
chr12-34	chr12	122224514	122224656	+	12.4	0.611	54	53	6.9	7.7	6.75e-29	7.6	1.31e-28
chr14-29	chr14	50507304	50507446	+	12.4	0.696	53	53	3.8	13.87	3.98e-41	6.31	6.03e-25
chr14-35	chr14	52294789	52294931	+	12.4	0.699	50	54	3.1	17.66	3.48e-47	5.54	1.85e-22
chr14-26	chr14	74551158	74551300	+	12.4	0.648	54	53	3.8	13.87	3.98e-41	8.8	1.34e-31
chr14-27	chr14	90722810	90722952	+	12.4	0.741	54	53	2.3	23.11	3.11e-52	10.87	5.67e-36
chr15-1	chr15	88360173	88360315	+	12.4	0.75	53	53	2.3	23.11	3.11e-52	14.91	1.11e-42
chr17-43	chr17	38642510	38642652	+	12.4	0.65	53	53	7.6	6.93	8.5e-27	9.39	6.28e-33
chr17-47	chr17	40075346	40075488	+	12.4	0.713	52	53	3.1	17.34	6.16e-46	12.77	2.26e-39
chr18-21	chr18	74747914	74748056	+	12.4	0.857	57	53	3.1	17.34	6.16e-46	12.73	2.68e-39
chr19-62	chr19	38878837	38878979	+	12.4	0.609	56	53	3.8	13.87	3.98e-41	7.28	9.35e-28
chr20-46	chr20	36772642	36772784	+	12.4	0.728	50	53	4.6	11.56	2.96e-37	7.15	2.11e-27
chr20-33	chr20	37081621	37081763	+	12.4	0.817	54	53	6.1	8.67	2.77e-31	8.4	1.22e-30
chr20-47	chr20	46020852	46020994	+	12.4	0.664	50	53	6.9	7.7	6.75e-29	7.79	4.06e-29
chr20-34	chr20	55614596	55614738	+	12.4	0.64	54	53	6.1	8.67	2.77e-31	8.25	2.86e-30
chr1-59	chr1	118472277	118472419	+	12.1	0.771	54	52	6.9	7.56	5.21e-28	16.44	5.61e-44
chr1-80	chr1	203507339	203507481	+	12.1	0.702	51	52	7.6	6.8	5.91e-26	11.03	1.28e-35
chr1-74	chr1	235147477	235147619	+	12.1	0.659	52	52	0.8	68.03	4.92e-75	9.9	8.33e-33
chr2-84	chr2	37311533	37311675	+	12.1	0.769	52	52	4.6	11.34	3.43e-36	17.23	5.63e-45
chr2-81	chr2	47403601	47403743	+	12.1	0.667	53	53	2.3	23.11	3.11e-52	14.81	9.11e-42
chr2-91	chr2	118870646	118870788	+	12.1	0.788	51	52	3.8	13.61	5.53e-40	15.72	5.01e-43
chr3-17	chr3	45260654	45260796	+	12.1	0.773	52	53	2.3	23.11	3.11e-52	14.22	6.49e-41
chr3-13	chr3	195627707	195627849	+	12.1	0.74	54	52	3.8	13.61	5.53e-40	11.99	2.42e-37
chr4-23	chr4	7830234	7830376	+	12.1	0.744	54	53	2.3	23.11	3.11e-52	20.72	6.39e-49
chr4-24	chr4	30210466	30210608	+	12.1	0.703	53	53	0.8	69.34	7.09e-77	17.57	2.17e-45
chr4-32	chr4	174173635	174173777	+	12.1	0.649	51	52	2.3	22.68	7.2e-51	18.5	1.24e-45
chr5-31	chr5	37371166	37371308	+	12.1	0.612	52	52	3.1	17.01	1.07e-44	11.31	3.92e-36
chr5-28	chr5	53997131	53997273	+	12.1	0.795	53	52	7.6	6.8	5.91e-26	11.68	3.97e-36
chr5-32	chr5	60594591	60594733	+	12.1	0.664	52	53	1.5	34.67	3.06e-61	9.2	2.39e-31
chr6-107	chr6	4854578	4854720	+	12.1	0.7	53	52	3.8	13.61	5.53e-40	12.71	1.47e-38
chr6-100	chr6	7692504	7692646	+	12.1	0.67	54	52	6.1	8.5	2.41e-30	8.36	5.43e-30
chr6-101	chr6	8102767	8102909	+	12.1	0.821	54	52	3.1	17.01	1.07e-44	12.32	6.62e-38
chr6-110	chr6	36547557	36547699	+	12.1	0.583	53	52	9.2	5.67	1.74e-22	5.46	8.46e-22
chr6-111	chr6	40995559	40995701	+	12.1	0.699	53	52	10.7	4.86	1.18e-19	5.73	2.88e-22
chr6-112	chr6	41570919	41571061	+	12.1	0.711	53	52	6.1	8.5	2.41e-30	5.53	7.67e-21
chr6-114	chr6	57377048	57377190	+	12.1	0.699	53	52	6.1	8.5	2.41e-30	8.15	1.73e-29
chr8-38	chr8	144300536	144300678	+	12.1	0.633	52	52	1.5	34.02	1.06e-59	4.96	2.58e-19
chr9-26	chr9	75058334	75058476	+	12.1	0.761	51	52	4.6	11.34	3.43e-36	8.89	3.04e-31
chr9-24	chr9	88936348	88936490	+	12.1	0.775	52	52	3.8	13.61	5.53e-40	15.72	5.01e-43
chr10-39	chr10	3581396	3581538	+	12.1	0.768	57	54	4.6	11.78	2.51e-38	15.72	5.01e-43
chr10-50	chr10	123811281	123811423	+	12.1	0.697	52	52	1.5	34.02	1.06e-59	13.48	8.85e-40
chr11-39	chr11	48077456	48077598	+	12.1	0.714	52	52	5.4	9.72	4.91e-33	10.8	3.51e-35
chr11-33	chr11	66738356	66738498	+	12.1	0.635	54	52	5.4	9.72	4.91e-33	7.83	1.08e-28
chr11-30	chr11	111957476	111957618	+	12.1	0.739	55	53	4.6	11.56	2.96e-37	12.94	6.22e-39
chr12-29	chr12	96879012	96879154	+	12.1	0.677	56	52	3.8	13.61	5.53e-40	9.68	2.32e-32
chr14-25	chr14	50529445	50529587	+	12.1	0.693	54	52	6.1	8.5	2.41e-30	8.41	3.94e-30
chr16-27	chr16	85801355	85801497	+	12.1	0.847	55	52	5.4	9.72	4.91e-33	20.72	6.39e-49
chr19-75	chr19	8067410	8067552	+	12.1	0.778	51	52	4.6	11.34	3.43e-36	8.49	9.17e-30
chr20-35	chr20	32377487	32377629	+	12.1	0.808	53	52	5.4	9.72	4.91e-33	9.21	5.91e-32
chr20-36	chr20	37054785	37054927	+	12.1	0.637	53	52	3.8	13.61	5.53e-40	6.66	1.5e-25
chr20-31	chr20	42472214	42472356	+	12.1	0.648	55	52	6.1	8.5	2.41e-30	7.09	2.88e-26
chr20-37	chr20	47835755	47835897	+	12.1	0.72	53	52	2.3	22.68	7.2e-51	10.43	7.57e-34
chr1-66	chr1	86010492	86010634	+	11.9	0.67	53	51	4.6	11.12	3.9e-35	12.49	8.68e-37
chr1-73	chr1	203528714	203528856	+	11.9	0.769	52	51	6.9	7.41	3.95e-27	9.04	5.46e-31
chr2-80	chr2	44327612	44327754	+	11.9	0.713	53	51	3.8	13.35	7.54e-39	11.41	1.16e-35
chr3-22	chr3	11612355	11612497	+	11.9	0.797	49	51	6.9	7.41	3.95e-27	14.18	4.33e-40
chr3-14	chr3	46441756	46441898	+	11.9	0.741	53	51	1.5	33.36	3.62e-58	9.66	2.63e-32
chr3-23	chr3	50384737	50384879	+	11.9	0.795	49	51	1.5	33.36	3.62e-58	11.72	3.4e-36
chr3-21	chr3	194247910	194248052	+	11.9	0.731	50	51	9.9	5.13	2.78e-20	12.33	3.08e-37
chr4-27	chr4	1318016	1318158	+	11.9	0.602	51	51	3.8	13.35	7.54e-39	9.37	1.03e-31
chr4-28	chr4	3957228	3957370	+	11.9	0.77	51	51	6.1	8.34	2.05e-29	15.69	3.39e-42
chr5-29	chr5	132202182	132202324	+	11.9	0.738	53	51	3.1	16.68	1.82e-43	10.29	6.05e-33
chr6-116	chr6	26473930	26474072	+	11.9	0.824	52	51	2.3	22.24	1.63e-49	9.9	3.37e-32
chr6-109	chr6	30720206	30720348	+	11.9	0.699	53	51	7.6	6.67	4.04e-25	5.42	2.97e-21
chr6-122	chr6	31620719	31620861	+	11.9	0.57	51	51	3.8	13.35	7.54e-39	6.77	2.1e-25
chr6-134	chr6	37096331	37096473	+	11.9	0.696	50	52	7.6	6.8	5.91e-26	5.11	7.5e-20
chr6-137	chr6	73121969	73122111	+	11.9	0.756	50	51	6.1	8.34	2.05e-29	11.88	1.81e-36
chr6-161	chr6	133135564	133135706	+	11.9	0.718	48	51	3.1	16.68	1.82e-43	17.49	1.87e-44
chr8-34	chr8	95254727	95254869	+	11.9	0.68	55	52	6.1	8.5	2.41e-30	10.4	8.68e-34
chr10-51	chr10	13908567	13908709	+	11.9	0.589	51	51	2.3	22.24	1.63e-49	10.88	1.06e-34
chr10-48	chr10	104614221	104614363	+	11.9	0.787	53	51	5.4	9.53	4.79e-32	16.28	5.94e-43
chr10-45	chr10	105610106	105610248	+	11.9	0.759	54	52	2.3	22.68	7.2e-51	11.6	5.41e-36
chr11-34	chr11	7626867	7627009	+	11.9	0.602	53	53	4.6	11.56	2.96e-37	9.35	1.16e-31
chr11-38	chr11	12098225	12098367	+	11.9	0.677	52	51	3.1	16.68	1.82e-43	9.37	1.03e-31
chr11-31	chr11	16759999	16760141	+	11.9	0.703	54	51	5.4	9.53	4.79e-32	12.21	5.03e-37
chr12-43	chr12	120972997	120973139	+	11.9	0.611	50	51	5.4	9.53	4.79e-32	8.72	2.71e-30
chr14-33	chr14	50505646	50505788	+	11.9	0.711	51	51	3.8	13.35	7.54e-39	6.41	6.57e-24
chr14-36	chr14	53161629	53161771	+	11.9	0.598	50	51	6.1	8.34	2.05e-29	8.92	9.75e-31
chr14-30	chr14	54649487	54649629	+	11.9	0.721	52	51	5.4	9.53	4.79e-32	7	4.88e-26
chr16-32	chr16	30661884	30662026	+	11.9	0.756	50	51	1.5	33.36	3.62e-58	14.77	6.11e-41
chr17-45	chr17	57232544	57232686	+	11.9	0.718	53	52	5.4	9.72	4.91e-33	14.07	3.49e-39
chr18-24	chr18	702909	703051	+	11.9	0.808	52	51	0.8	66.73	3.35e-73	14.53	1.35e-40
chr18-26	chr18	20679784	20679926	+	11.9	0.644	50	51	2.3	22.24	1.63e-49	9.01	6.13e-31
chr19-86	chr19	14247870	14248012	+	11.9	0.72	49	51	7.6	6.67	4.04e-25	6.8	1.77e-25
chr19-74	chr19	49497039	49497181	+	11.9	0.778	52	51	5.4	9.53	4.79e-32	10.17	4.19e-32
chr20-32	chr20	35374545	35374687	+	11.9	0.803	54	52	3.8	13.61	5.53e-40	9.01	6.13e-31
chr20-28	chr20	43588398	43588540	+	11.9	0.779	56	52	6.1	8.5	2.41e-30	10.99	6.88e-35
chr20-23	chr20	45318335	45318477	+	11.9	0.663	57	52	3.8	13.61	5.53e-40	9.4	9.08e-32
chr20-48	chr20	60813292	60813434	+	11.9	0.811	50	51	11.5	4.45	9.24e-18	9.43	1.16e-30
chr1-89	chr1	27438486	27438628	+	11.7	0.787	49	50	3.1	16.35	3.04e-42	9.76	2.6e-31
chr1-76	chr1	75198711	75198853	+	11.7	0.619	51	50	5.4	9.35	4.57e-31	13.9	6.14e-39
chr1-82	chr1	227148065	227148207	+	11.7	0.663	51	50	6.1	8.18	1.72e-28	11.18	6.18e-34
chr2-90	chr2	47243709	47243851	+	11.7	0.695	51	50	6.9	7.27	2.94e-26	8.66	4.91e-29
chr3-15	chr3	40494924	40495066	+	11.7	0.593	52	50	6.9	7.27	2.94e-26	10.02	2e-32
chr3-12	chr3	75484422	75484564	+	11.7	0.726	55	50	5.4	9.35	4.57e-31	14.24	1.97e-39
chr4-31	chr4	129244359	129244501	+	11.7	0.663	51	50	6.9	7.27	2.94e-26	13.05	1.11e-37
chr4-33	chr4	189552354	189552496	+	11.7	0.663	50	50	7.6	6.54	2.7e-24	13.09	5.15e-37
chr5-34	chr5	171864698	171864840	+	11.7	0.702	52	50	6.1	8.18	1.72e-28	11.08	2.07e-34
chr6-140	chr6	2988190	2988332	+	11.7	0.685	49	50	5.4	9.35	4.57e-31	4.78	5.33e-18
chr6-123	chr6	31830801	31830943	+	11.7	0.785	51	51	3.8	13.35	7.54e-39	8.06	1.09e-27
chr6-146	chr6	37225400	37225542	+	11.7	0.667	49	50	9.2	5.45	5.52e-21	6.47	4.42e-24
chr6-117	chr6	41888838	41888980	+	11.7	0.673	52	50	11.5	4.36	4.13e-17	5.12	7.06e-20
chr6-118	chr6	119468294	119468436	+	11.7	0.747	52	50	4.6	10.9	4.34e-34	15.96	9.68e-42
chr10-42	chr10	65477886	65478028	+	11.7	0.838	55	51	5.4	9.53	4.79e-32	13.26	5.5e-38
chr10-49	chr10	75504042	75504184	+	11.7	0.776	52	50	3.1	16.35	3.04e-42	10.23	7.91e-33
chr11-42	chr11	6256154	6256296	+	11.7	0.613	50	50	3.1	16.35	3.04e-42	9.76	6.41e-32
chr11-46	chr11	65187612	65187754	+	11.7	0.67	50	50	3.8	13.08	1.01e-37	5.55	2.65e-21
chr12-36	chr12	105352391	105352533	+	11.7	0.77	52	50	9.2	5.45	5.52e-21	8.91	1.41e-29
chr12-42	chr12	110389696	110389838	+	11.7	0.586	50	50	3.8	13.08	1.01e-37	8.64	1.53e-29
chr12-40	chr12	110984309	110984451	+	11.7	0.783	51	50	2.3	21.81	3.64e-48	10.54	2.02e-33
chr12-41	chr12	122502868	122503010	+	11.7	0.785	51	50	8.4	5.95	1.5e-22	9.54	7.11e-31
chr14-34	chr14	50465994	50466136	+	11.7	0.739	50	50	6.9	7.27	2.94e-26	5.91	1.93e-22
chr17-49	chr17	9571927	9572069	+	11.7	0.851	51	50	3.8	13.08	1.01e-37	13.1	9.35e-38
chr17-46	chr17	38444043	38444185	+	11.7	0.685	52	50	5.4	9.35	4.57e-31	10.23	7.91e-33
chr17-44	chr17	38707605	38707747	+	11.7	0.727	53	50	4.6	10.9	4.34e-34	6.35	9.73e-24
chr17-50	chr17	43398353	43398495	+	11.7	0.622	51	51	6.1	8.34	2.05e-29	7.06	1.02e-25
chr19-72	chr19	6674990	6675132	+	11.7	0.667	52	50	4.6	10.9	4.34e-34	7.54	1.92e-26
chr19-73	chr19	13254030	13254172	+	11.7	0.521	52	51	6.1	8.34	2.05e-29	6.38	7.69e-24
chr19-78	chr19	14638460	14638602	+	11.7	0.65	51	50	8.4	5.95	1.5e-22	6.73	2.36e-24
chr19-84	chr19	18390381	18390523	+	11.7	0.678	50	50	8.4	5.95	1.5e-22	7.74	1.86e-27
chr20-49	chr20	3749476	3749618	+	11.7	0.677	49	50	3.1	16.35	3.04e-42	12.01	5.24e-36
chr20-43	chr20	30181118	30181260	+	11.7	0.67	50	50	8.4	5.95	1.5e-22	7.44	3.39e-26
chr20-39	chr20	36701983	36702125	+	11.7	0.67	52	50	7.6	6.54	2.7e-24	8.55	2.37e-29
chr1-98	chr1	9291699	9291841	+	11.4	0.8	48	49	1.5	32.05	3.95e-55	12.42	5.62e-36
chr1-90	chr1	31296834	31296976	+	11.4	0.812	49	49	4.6	10.68	4.74e-33	9.62	1.98e-30
chr1-84	chr1	35513114	35513256	+	11.4	0.757	50	49	5.4	9.16	4.28e-30	17.5	8.61e-43
chr1-92	chr1	64211970	64212112	+	11.4	0.725	49	49	5.4	9.16	4.28e-30	13.34	1.17e-36
chr1-114	chr1	149224494	149224636	+	11.4	0.759	47	49	11.5	4.27	1.81e-16	7.73	6.65e-27
chr1-79	chr1	153517627	153517769	+	11.4	0.79	51	49	5.4	9.16	4.28e-30	5.97	8.67e-22
chr1-147	chr1	202174500	202174642	+	11.4	0.775	44	49	5.4	9.16	4.28e-30	7.29	7.81e-26
chr1-97	chr1	222019327	222019469	+	11.4	0.781	49	49	3.1	16.03	4.98e-41	15.86	8.13e-41
chr3-26	chr3	9772587	9772729	+	11.4	0.66	48	49	3.8	12.82	1.32e-36	9.18	3.9e-30
chr3-31	chr3	38206860	38207002	+	11.4	0.795	46	49	5.4	9.16	4.28e-30	15.86	8.13e-41
chr3-20	chr3	46027858	46028000	+	11.4	0.774	50	50	7.6	6.54	2.7e-24	11.15	7.17e-34
chr4-34	chr4	76649753	76649895	+	11.4	0.763	49	50	4.6	10.9	4.34e-34	10.24	3.2e-32
chr4-37	chr4	173903417	173903559	+	11.4	0.779	49	49	6.1	8.01	1.41e-27	17.51	5.85e-42
chr6-129	chr6	2765586	2765728	+	11.4	0.759	50	49	5.4	9.16	4.28e-30	11.49	1.86e-34
chr6-139	chr6	2876602	2876744	+	11.4	0.646	49	49	8.4	5.83	8.97e-22	8.44	1.47e-28
chr6-130	chr6	5082897	5083039	+	11.4	0.663	50	49	7.6	6.41	1.77e-23	8.8	8.99e-29
chr6-102	chr6	11012071	11012213	+	11.4	0.691	54	51	6.9	7.41	3.95e-27	10.33	2.14e-32
chr6-119	chr6	19852078	19852220	+	11.4	0.645	51	49	7.6	6.41	1.77e-23	10.39	1.63e-32
chr6-124	chr6	33041410	33041552	+	11.4	0.685	51	49	6.9	7.12	2.14e-25	9.01	8.88e-30
chr6-132	chr6	35149335	35149477	+	11.4	0.621	50	49	7.6	6.41	1.77e-23	4.24	2.38e-16
chr6-133	chr6	36566852	36566994	+	11.4	0.702	50	49	8.4	5.83	8.97e-22	4.41	1.17e-16
chr6-157	chr6	38227698	38227840	+	11.4	0.674	48	49	6.1	8.01	1.41e-27	5.18	5.86e-19
chr6-159	chr6	43595049	43595191	+	11.4	0.75	48	49	5.4	9.16	4.28e-30	6.78	1.69e-24
chr6-178	chr6	137540550	137540692	+	11.4	0.731	47	49	2.3	21.37	7.94e-47	13.62	8.55e-38
chr8-39	chr8	122261101	122261243	+	11.4	0.789	51	49	6.1	8.01	1.41e-27	16.8	5.63e-42
chr9-30	chr9	34652269	34652411	+	11.4	0.67	49	50	6.9	7.27	2.94e-26	9.41	1.32e-30
chr10-59	chr10	3867609	3867751	+	11.4	0.744	49	49	3.8	12.82	1.32e-36	13.46	1.48e-37
chr10-57	chr10	29273394	29273536	+	11.4	0.74	50	49	4.6	10.68	4.74e-33	12.25	5.05e-35
chr10-55	chr10	99052375	99052517	+	11.4	0.733	51	49	7.6	6.41	1.77e-23	11.37	2.93e-34
chr10-56	chr10	103127365	103127507	+	11.4	0.739	51	49	5.4	9.16	4.28e-30	11.26	4.59e-34
chr11-41	chr11	12222495	12222637	+	11.4	0.747	51	49	3.1	16.03	4.98e-41	12.89	1.03e-36
chr11-50	chr11	62358961	62359103	+	11.4	0.812	49	50	4.6	10.9	4.34e-34	11.3	3.96e-34
chr12-39	chr12	91417179	91417321	+	11.4	0.678	51	50	5.4	9.35	4.57e-31	16.14	2.3e-40
chr12-37	chr12	110498088	110498230	+	11.4	0.728	52	49	6.1	8.01	1.41e-27	6.51	9.5e-24
chr14-39	chr14	37641220	37641362	+	11.4	0.64	49	49	7.6	6.41	1.77e-23	13.14	4.31e-37
chr16-29	chr16	4993436	4993578	+	11.4	0.69	52	50	3.1	16.35	3.04e-42	9.82	2.01e-31
chr16-33	chr16	31063591	31063733	+	11.4	0.608	50	49	3.1	16.03	4.98e-41	10.48	2.02e-31
chr17-51	chr17	48238931	48239073	+	11.4	0.765	51	49	4.6	10.68	4.74e-33	10.76	3.52e-33
chr17-42	chr17	80245933	80246075	+	11.4	0.771	54	49	6.9	7.12	2.14e-25	7.76	5.46e-27
chr18-27	chr18	68051718	68051860	+	11.4	0.72	49	49	4.6	10.68	4.74e-33	17.15	2.22e-42
chr19-93	chr19	9879317	9879459	+	11.4	0.671	48	49	2.3	21.37	7.94e-47	11.94	1.56e-34
chr19-76	chr19	13167047	13167189	+	11.4	0.707	51	49	5.4	9.16	4.28e-30	6.6	5.39e-24
chr19-81	chr19	13945008	13945150	+	11.4	0.587	50	49	7.6	6.41	1.77e-23	5.66	3e-21
chr19-77	chr19	14513209	14513351	+	11.4	0.663	51	50	6.1	8.18	1.72e-28	5.9	1.43e-21
chr19-70	chr19	17186244	17186386	+	11.4	0.63	53	49	10.7	4.58	1.3e-17	5.61	4.21e-21
chr19-82	chr19	17530553	17530695	+	11.4	0.717	50	50	8.4	5.95	1.5e-22	8.1	8.89e-28
chr19-88	chr19	17624559	17624701	+	11.4	0.659	49	49	3.1	16.03	4.98e-41	7.47	2.81e-26
chr19-98	chr19	36422583	36422725	+	11.4	0.73	48	49	2.3	21.37	7.94e-47	12.15	1.5e-35
chr20-42	chr20	25203942	25204084	+	11.4	0.714	50	49	4.6	10.68	4.74e-33	11.85	4.6e-35
chr20-44	chr20	33495616	33495758	+	11.4	0.67	50	49	4.6	10.68	4.74e-33	9.1	5.56e-30
chr20-45	chr20	36618935	36619077	+	11.4	0.654	50	49	5.4	9.16	4.28e-30	5.98	3.18e-22
chr20-41	chr20	44048166	44048308	+	11.4	0.652	51	49	5.4	9.16	4.28e-30	11.26	4.59e-34
chr20-50	chr20	49951974	49952116	+	11.4	0.694	49	49	3.1	16.03	4.98e-41	7.8	4.49e-27
chr21-25	chr21	37575936	37576078	+	11.4	0.712	49	50	3.1	16.35	3.04e-42	13.46	1.48e-37
chr1-88	chr1	9498884	9499026	+	11.2	0.678	49	49	4.6	10.68	4.74e-33	12.82	6.75e-36
chr1-100	chr1	42805860	42806002	+	11.2	0.817	48	49	3.8	12.82	1.32e-36	10.5	4.36e-32
chr1-112	chr1	84367440	84367582	+	11.2	0.663	47	49	3.1	16.03	4.98e-41	12.77	8.01e-36
chr1-85	chr1	96828170	96828312	+	11.2	0.608	50	48	3.8	12.56	1.7e-35	12.92	4.78e-36
chr1-78	chr1	144018664	144018806	+	11.2	0.63	51	49	6.1	8.01	1.41e-27	9.82	8.15e-31
chr1-94	chr1	145083566	145083708	+	11.2	0.615	49	49	9.2	5.34	3.02e-20	6.65	3.14e-23
chr1-71	chr1	153963081	153963223	+	11.2	0.778	52	48	6.1	7.85	1.13e-26	9.97	4.27e-31
chr1-116	chr1	155621382	155621524	+	11.2	0.9	47	48	5.4	8.97	3.93e-29	17.41	7.42e-42
chr1-87	chr1	155940400	155940542	+	11.2	0.69	50	48	6.1	7.85	1.13e-26	7.54	6.24e-26
chr1-72	chr1	162106706	162106848	+	11.2	0.753	52	48	3.8	12.56	1.7e-35	12.37	1.69e-34
chr1-102	chr1	204407838	204407980	+	11.2	0.671	48	48	3.8	12.56	1.7e-35	9.13	7.17e-29
chr1-103	chr1	220445793	220445935	+	11.2	0.805	48	48	3.8	12.56	1.7e-35	9.94	4.86e-31
chr1-81	chr1	221915387	221915529	+	11.2	0.622	51	48	3.8	12.56	1.7e-35	8.27	1.25e-27
chr1-104	chr1	226187070	226187212	+	11.2	0.716	48	48	5.4	8.97	3.93e-29	10.6	2.87e-32
chr2-89	chr2	23634722	23634864	+	11.2	0.813	51	49	5.4	9.16	4.28e-30	12.39	3.08e-35
chr2-106	chr2	47582765	47582907	+	11.2	0.779	46	48	0.4	125.6	4.88e-82	12.03	1.13e-34
chr2-96	chr2	62515133	62515275	+	11.2	0.625	48	48	2.3	20.93	1.7e-45	12.12	8.22e-35
chr2-85	chr2	88927056	88927198	+	11.2	0.683	52	48	2.3	20.93	1.7e-45	8.51	3.82e-28
chr2-105	chr2	113998543	113998685	+	11.2	0.708	47	48	1.5	31.4	1.27e-53	12.41	1.43e-34
chr3-19	chr3	43908138	43908280	+	11.2	0.593	50	48	3.8	12.56	1.7e-35	7.9	8.83e-27
chr5-35	chr5	32193863	32194005	+	11.2	0.643	51	50	6.9	7.27	2.94e-26	12.39	3.08e-35
chr5-38	chr5	33772503	33772645	+	11.2	0.779	49	48	3.8	12.56	1.7e-35	15.83	5.5e-40
chr5-46	chr5	73622940	73623082	+	11.2	0.787	45	48	3.1	15.7	7.99e-40	10.85	1.07e-32
chr5-39	chr5	133845059	133845201	+	11.2	0.779	49	48	6.1	7.85	1.13e-26	7.5	7.54e-26
chr6-141	chr6	3251815	3251957	+	11.2	0.806	49	48	3.8	12.56	1.7e-35	7.19	4.37e-25
chr6-142	chr6	4581828	4581970	+	11.2	0.768	49	48	8.4	5.71	5.25e-21	9.79	3.75e-30
chr6-143	chr6	30684945	30685087	+	11.2	0.618	49	48	3.1	15.7	7.99e-40	6.51	7.67e-23
chr6-131	chr6	34212282	34212424	+	11.2	0.688	50	48	8.4	5.71	5.25e-21	7.08	8.16e-25
chr6-176	chr6	53658421	53658563	+	11.2	0.712	47	48	3.8	12.56	1.7e-35	11.77	2.93e-34
chr7-29	chr7	61100226	61100368	+	11.2	0.646	48	48	9.2	5.23	1.62e-19	7.59	4.68e-26
chr7-28	chr7	151442485	151442627	+	11.2	0.644	50	50	7.6	6.54	2.7e-24	8.78	1.01e-28
chr8-46	chr8	110551740	110551882	+	11.2	0.709	47	48	3.8	12.56	1.7e-35	12.09	4.49e-34
chr8-41	chr8	133715900	133716042	+	11.2	0.725	49	48	3.1	15.7	7.99e-40	9.56	2.54e-30
chr9-35	chr9	35072813	35072955	+	11.2	0.653	48	48	4.6	10.47	5.08e-32	8.21	1.71e-27
chr9-34	chr9	139304993	139305135	+	11.2	0.887	49	49	5.4	9.16	4.28e-30	13.39	5.37e-36
chr10-46	chr10	29421032	29421174	+	11.2	0.789	53	48	4.6	10.47	5.08e-32	17.41	7.42e-42
chr10-61	chr10	44349652	44349794	+	11.2	0.831	49	48	0.8	62.8	9.36e-68	10.57	6.2e-31
chr10-62	chr10	80737803	80737945	+	11.2	0.641	49	48	4.6	10.47	5.08e-32	6.59	1.6e-23
chr11-53	chr11	73667286	73667428	+	11.2	0.791	48	48	4.6	10.47	5.08e-32	13.13	2.37e-36
chr11-56	chr11	106027111	106027253	+	11.2	0.78	47	48	3.1	15.7	7.99e-40	12.25	5.05e-35
chr11-51	chr11	129873473	129873615	+	11.2	0.704	49	49	8.4	5.83	8.97e-22	12.75	4.4e-35
chr12-45	chr12	6389393	6389535	+	11.2	0.721	49	48	3.8	12.56	1.7e-35	13.08	2.83e-36
chr12-53	chr12	96231883	96232025	+	11.2	0.655	47	48	6.9	6.98	1.53e-24	14.08	1.06e-37
chr12-46	chr12	112123756	112123898	+	11.2	0.864	48	49	7.6	6.41	1.77e-23	11.91	8.52e-34
chr14-41	chr14	73133481	73133623	+	11.2	0.857	47	48	2.3	20.93	1.7e-45	10.12	8.96e-31
chr14-31	chr14	93214994	93215136	+	11.2	0.606	52	48	3.8	12.56	1.7e-35	9.35	6.8e-30
chr14-37	chr14	105957316	105957458	+	11.2	0.721	50	48	2.3	20.93	1.7e-45	8.15	2.34e-27
chr16-34	chr16	74729852	74729994	+	11.2	0.803	49	48	2.3	20.93	1.7e-45	14.39	4.04e-38
chr17-62	chr17	28422836	28422978	+	11.2	0.784	48	48	0.8	62.8	9.36e-68	8.91	2.65e-27
chr17-67	chr17	42610986	42611128	+	11.2	0.694	47	48	3.1	15.7	7.99e-40	9.22	1.24e-29
chr17-64	chr17	56612942	56613084	+	11.2	0.824	48	48	3.8	12.56	1.7e-35	12.21	5.94e-35
chr17-66	chr17	78621599	78621741	+	11.2	0.648	48	48	5.4	8.97	3.93e-29	10.71	1.88e-32
chr19-110	chr19	8578524	8578666	+	11.2	0.616	46	48	6.9	6.98	1.53e-24	8.66	6.35e-28
chr19-83	chr19	17901363	17901505	+	11.2	0.747	50	48	8.4	5.71	5.25e-21	6.74	6.44e-24
chr19-97	chr19	18570739	18570881	+	11.2	0.551	48	49	8.4	5.83	8.97e-22	6.33	2.32e-22
chr19-91	chr19	39569643	39569785	+	11.2	0.792	49	48	6.1	7.85	1.13e-26	12.51	1.02e-34
chr19-85	chr19	58838183	58838325	+	11.2	0.612	50	50	8.4	5.95	1.5e-22	8.44	5.29e-28
chr1-75	chr1	17231445	17231587	+	11	0.627	51	48	6.9	6.98	1.53e-24	9.94	1.97e-30
chr1-99	chr1	27561064	27561206	+	11	0.68	48	47	4.6	10.25	5.33e-31	11.17	1.34e-32
chr1-91	chr1	44300286	44300428	+	11	0.656	49	47	4.6	10.25	5.33e-31	8.85	2.57e-28
chr1-101	chr1	44509850	44509992	+	11	0.573	48	48	3.8	12.56	1.7e-35	7.23	1.08e-24
chr1-77	chr1	117602745	117602887	+	11	0.759	51	47	2.3	20.5	3.56e-44	12.46	1.21e-34
chr1-95	chr1	165868122	165868264	+	11	0.732	49	47	6.1	7.69	8.91e-26	9.64	7.07e-30
chr1-96	chr1	180120697	180120839	+	11	0.716	49	47	1.5	30.75	3.98e-52	8.88	2.3e-28
chr1-118	chr1	205888246	205888388	+	11	0.819	47	47	3.8	12.3	2.13e-34	8.95	1.62e-28
chr2-108	chr2	86121060	86121202	+	11	0.683	46	47	0.4	122.98	6.12e-80	7.94	2.34e-26
chr3-38	chr3	124531773	124531915	+	11	0.778	45	47	5.4	8.78	3.54e-28	10.8	5.73e-32
chr3-39	chr3	170444987	170445129	+	11	0.712	45	47	5.4	8.78	3.54e-28	8.29	4.03e-27
chr4-60	chr4	40296215	40296357	+	11	0.842	40	48	5.4	8.97	3.93e-29	6.15	7.28e-22
chr4-30	chr4	57608726	57608868	+	11	0.77	51	47	4.6	10.25	5.33e-31	12.04	5.28e-34
chr4-35	chr4	114367251	114367393	+	11	0.794	49	47	3.8	12.3	2.13e-34	16.53	5.13e-40
chr4-36	chr4	152682207	152682349	+	11	0.803	49	47	5.4	8.78	3.54e-28	17.23	8.1e-41
chr5-30	chr5	912630	912772	+	11	0.653	52	48	6.9	6.98	1.53e-24	7.2	1.29e-24
chr5-43	chr5	142207868	142208010	+	11	0.761	46	47	3.8	12.3	2.13e-34	8.46	1.71e-27
chr5-37	chr5	157286118	157286260	+	11	0.823	50	47	4.6	10.25	5.33e-31	16.36	8.03e-40
chr6-115	chr6	7505620	7505762	+	11	0.724	52	49	6.9	7.12	2.14e-25	8.78	3.62e-28
chr6-166	chr6	27100484	27100626	+	11	0.648	47	47	4.6	10.25	5.33e-31	9.45	1.69e-29
chr6-184	chr6	33572884	33573026	+	11	0.74	46	47	4.6	10.25	5.33e-31	6.51	7.67e-23
chr6-153	chr6	35310051	35310193	+	11	0.712	48	48	9.9	4.83	3.59e-18	6.29	2.92e-22
chr6-154	chr6	37210203	37210345	+	11	0.564	48	47	6.9	6.83	1.07e-23	4.38	2.89e-16
chr6-155	chr6	37210507	37210649	+	11	0.612	48	47	8.4	5.59	3.01e-20	4.27	7.65e-16
chr6-136	chr6	37293609	37293751	+	11	0.708	50	47	6.1	7.69	8.91e-26	6.34	2.14e-22
chr6-188	chr6	38216697	38216839	+	11	0.675	46	47	7.6	6.15	7.19e-22	5.09	1.07e-18
chr6-148	chr6	42255719	42255861	+	11	0.63	49	47	6.9	6.83	1.07e-23	6.91	6.89e-24
chr6-158	chr6	42488846	42488988	+	11	0.718	48	47	10.7	4.39	2.7e-16	8.41	2.12e-27
chr6-149	chr6	42929830	42929972	+	11	0.694	49	47	7.6	6.15	7.19e-22	5.16	6.61e-19
chr6-160	chr6	52368937	52369079	+	11	0.624	48	48	4.6	10.47	5.08e-32	8.08	1.15e-26
chr6-138	chr6	166980703	166980845	+	11	0.75	50	47	5.4	8.78	3.54e-28	12.46	1.21e-34
chr8-49	chr8	109455721	109455863	+	11	0.667	46	47	7.6	6.15	7.19e-22	10.87	4.3e-32
chr8-50	chr8	127546560	127546702	+	11	0.704	46	47	2.3	20.5	3.56e-44	8.37	2.63e-27
chr8-47	chr8	134315417	134315559	+	11	0.64	47	47	7.6	6.15	7.19e-22	7.75	2.06e-25
chr8-42	chr8	142140072	142140214	+	11	0.797	49	47	3.8	12.3	2.13e-34	6.68	2.66e-23
chr9-39	chr9	71786001	71786143	+	11	0.711	47	47	1.5	30.75	3.98e-52	11.13	1.55e-32
chr9-37	chr9	91768535	91768677	+	11	0.656	48	47	3.8	12.3	2.13e-34	11.29	8.58e-33
chr10-64	chr10	5590078	5590220	+	11	0.787	48	47	4.6	10.25	5.33e-31	6.82	1.15e-23
chr11-55	chr11	8790262	8790404	+	11	0.687	47	47	5.4	8.78	3.54e-28	9.1	8.07e-29
chr11-57	chr11	18405302	18405444	+	11	0.725	46	47	2.3	20.5	3.56e-44	10.19	6.86e-31
chr11-52	chr11	65679211	65679353	+	11	0.648	48	49	6.9	7.12	2.14e-25	5.5	1.34e-19
chr11-47	chr11	86195448	86195590	+	11	0.624	50	47	3.8	12.3	2.13e-34	11.57	2.97e-33
chr12-50	chr12	94071108	94071250	+	11	0.738	47	47	7.6	6.15	7.19e-22	9.75	7e-29
chr12-55	chr12	109005842	109005984	+	11	0.651	47	47	4.6	10.25	5.33e-31	9.15	6.37e-29
chr12-65	chr12	110562072	110562214	+	11	0.8	44	47	4.6	10.25	5.33e-31	12.27	2.35e-34
chr12-44	chr12	121790289	121790431	+	11	0.677	50	47	7.6	6.15	7.19e-22	9.23	4.45e-29
chr14-38	chr14	24911991	24912133	+	11	0.75	49	47	5.4	8.78	3.54e-28	10.48	2.02e-31
chr14-42	chr14	73413364	73413506	+	11	0.656	47	47	6.1	7.69	8.91e-26	9.1	8.07e-29
chr14-47	chr14	74190835	74190977	+	11	0.692	46	47	2.3	20.5	3.56e-44	10.66	1.01e-31
chr14-43	chr14	75701369	75701511	+	11	0.689	47	47	6.9	6.83	1.07e-23	15.07	3.03e-38
chr15-3	chr15	33159561	33159703	+	11	0.806	47	47	3.8	12.3	2.13e-34	26.13	6.43e-49
chr17-60	chr17	7835306	7835448	+	11	0.699	48	48	2.3	20.93	1.7e-45	9.28	3.5e-29
chr17-61	chr17	14109275	14109417	+	11	0.76	48	47	4.6	10.25	5.33e-31	11.92	3.97e-33
chr17-52	chr17	17942588	17942730	+	11	0.709	50	47	4.6	10.25	5.33e-31	10.62	1.16e-31
chr17-53	chr17	73687589	73687731	+	11	0.634	50	47	5.4	8.78	3.54e-28	7.93	8.4e-26
chr17-65	chr17	74667730	74667872	+	11	0.707	48	48	3.1	15.7	7.99e-40	10.66	1.01e-31
chr17-68	chr17	80256201	80256343	+	11	0.75	47	47	4.6	10.25	5.33e-31	10.59	1.33e-31
chr19-99	chr19	8426869	8427011	+	11	0.643	47	47	4.6	10.25	5.33e-31	6.75	1.75e-23
chr19-120	chr19	10828411	10828553	+	11	0.646	45	47	7.6	6.15	7.19e-22	9	1.29e-28
chr19-101	chr19	11279462	11279604	+	11	0.714	47	47	1.5	30.75	3.98e-52	8.5	4.94e-27
chr19-95	chr19	16439246	16439388	+	11	0.75	48	47	3.8	12.3	2.13e-34	4.86	6.47e-18
chr19-96	chr19	17422826	17422968	+	11	0.611	48	48	5.4	8.97	3.93e-29	4.72	1.95e-17
chr19-113	chr19	36505203	36505345	+	11	0.613	46	47	1.5	30.75	3.98e-52	9.31	3.1e-29
chr19-90	chr19	39184170	39184312	+	11	0.671	49	47	3.8	12.3	2.13e-34	11.16	6.25e-32
chr19-116	chr19	56652400	56652542	+	11	0.612	46	47	3.1	15.37	1.26e-38	10.06	1.17e-30
chr20-59	chr20	32988759	32988901	+	11	0.596	46	47	2.3	20.5	3.56e-44	10.13	3.63e-30
chr20-55	chr20	42142981	42143123	+	11	0.645	47	47	6.1	7.69	8.91e-26	8	1.73e-26
chr20-67	chr20	44713919	44714061	+	11	0.743	45	47	6.1	7.69	8.91e-26	14.21	3.98e-37
chr20-51	chr20	49126724	49126866	+	11	0.592	48	47	4.6	10.25	5.33e-31	7.1	2.21e-24
chr21-28	chr21	37985534	37985676	+	11	0.72	47	47	3.1	15.37	1.26e-38	13.21	5.05e-35
chr1-105	chr1	11753173	11753315	+	10.7	0.712	47	47	3.1	15.37	1.26e-38	10.71	3.54e-31
chr1-107	chr1	27627436	27627578	+	10.7	0.644	47	47	5.4	8.78	3.54e-28	8.46	6.15e-27
chr1-111	chr1	45272982	45273124	+	10.7	0.606	47	46	4.6	10.03	5.47e-30	7.66	3.35e-25
chr1-93	chr1	85744603	85744745	+	10.7	0.671	49	46	5.4	8.6	3.12e-27	10.46	9.39e-31
chr2-94	chr2	36214754	36214896	+	10.7	0.769	48	46	2.3	20.06	7.31e-43	17.71	1.66e-40
chr2-110	chr2	114644153	114644295	+	10.7	0.652	46	46	6.1	7.52	6.87e-25	13.61	1.43e-35
chr3-30	chr3	31118749	31118891	+	10.7	0.663	46	47	4.6	10.25	5.33e-31	13.38	2.96e-35
chr3-34	chr3	172241292	172241434	+	10.7	0.688	46	46	1.5	30.09	1.22e-50	10.86	2e-31
chr4-38	chr4	17723835	17723977	+	10.7	0.73	47	46	2.3	20.06	7.31e-43	13.66	3.62e-34
chr4-42	chr4	99609641	99609783	+	10.7	0.671	46	47	5.4	8.78	3.54e-28	9.73	1.96e-29
chr6-162	chr6	829765	829907	+	10.7	0.555	47	46	4.6	10.03	5.47e-30	9.19	2.03e-28
chr6-200	chr6	1686469	1686611	+	10.7	0.627	44	46	5.4	8.6	3.12e-27	7.06	8.54e-24
chr6-150	chr6	10722956	10723098	+	10.7	0.705	48	46	8.4	5.47	1.69e-19	8.19	2.21e-26
chr6-163	chr6	11316362	11316504	+	10.7	0.631	47	46	7.6	6.02	4.44e-21	6.32	5.11e-21
chr6-164	chr6	14744201	14744343	+	10.7	0.869	47	46	3.8	12.04	2.63e-33	8.98	5.2e-28
chr6-181	chr6	16089783	16089925	+	10.7	0.699	46	46	4.6	10.03	5.47e-30	10.71	3.54e-31
chr6-183	chr6	29600926	29601068	+	10.7	0.754	46	47	8.4	5.59	3.01e-20	7.57	5.43e-25
chr6-167	chr6	30749348	30749490	+	10.7	0.643	47	47	4.6	10.25	5.33e-31	5.26	7.53e-19
chr6-168	chr6	33385859	33386001	+	10.7	0.675	47	47	5.4	8.78	3.54e-28	5.68	4.02e-20
chr6-186	chr6	36088648	36088790	+	10.7	0.628	46	46	6.1	7.52	6.87e-25	4.66	1.43e-16
chr6-193	chr6	41703356	41703498	+	10.7	0.812	45	46	8.4	5.47	1.69e-19	5.45	1.99e-19
chr6-199	chr6	65214565	65214707	+	10.7	0.708	45	46	3.8	12.04	2.63e-33	12.45	7.87e-32
chr6-179	chr6	167104788	167104930	+	10.7	0.695	47	46	1.5	30.09	1.22e-50	11.71	4.06e-32
chr8-54	chr8	92082386	92082528	+	10.7	0.716	45	46	2.3	20.06	7.31e-43	18.54	2.27e-41
chr8-40	chr8	126711035	126711177	+	10.7	0.695	49	46	6.1	7.52	6.87e-25	8.11	3.35e-26
chr8-51	chr8	134415459	134415601	+	10.7	0.573	46	46	8.4	5.47	1.69e-19	7.66	3.35e-25
chr8-52	chr8	145016809	145016951	+	10.7	0.718	46	46	5.4	8.6	3.12e-27	6.12	6.31e-21
chr9-42	chr9	2570718	2570860	+	10.7	0.724	46	48	0.4	125.6	4.88e-82	16.43	4.35e-39
chr9-43	chr9	33415676	33415818	+	10.7	0.711	46	46	3.1	15.05	1.93e-37	9.14	2.57e-28
chr9-36	chr9	82473449	82473591	+	10.7	0.699	48	46	1.5	30.09	1.22e-50	19.1	6.23e-42
chr9-44	chr9	91752865	91753007	+	10.7	0.697	46	46	3.8	12.04	2.63e-33	20.2	5.45e-43
chr9-40	chr9	101834305	101834447	+	10.7	0.877	47	46	6.1	7.52	6.87e-25	9.33	1.11e-28
chr9-32	chr9	114942749	114942891	+	10.7	0.7	49	46	3.8	12.04	2.63e-33	10.33	1.62e-30
chr9-41	chr9	139476571	139476713	+	10.7	0.604	47	47	1.5	30.75	3.98e-52	6.33	6.33e-22
chr10-63	chr10	310753	310895	+	10.7	0.762	48	46	4.6	10.03	5.47e-30	13	1.02e-34
chr10-74	chr10	95943489	95943631	+	10.7	0.573	46	46	5.4	8.6	3.12e-27	9.49	5.34e-29
chr10-81	chr10	127581248	127581390	+	10.7	0.671	45	46	10.7	4.3	1.19e-15	4.03	2.16e-14
chr11-63	chr11	65101257	65101399	+	10.7	0.9	45	46	3.1	15.05	1.93e-37	10.46	9.39e-31
chr11-61	chr11	68842911	68843053	+	10.7	0.609	46	46	6.1	7.52	6.87e-25	6.66	8.56e-23
chr12-60	chr12	94656159	94656301	+	10.7	0.771	45	46	6.1	7.52	6.87e-25	12.34	9.25e-34
chr12-51	chr12	94963997	94964139	+	10.7	0.72	47	46	7.6	6.02	4.44e-21	6.44	3.12e-22
chr12-54	chr12	105868519	105868661	+	10.7	0.753	47	46	6.9	6.69	7.35e-23	12.58	4.02e-34
chr12-47	chr12	121124770	121124912	+	10.7	0.71	48	46	2.3	20.06	7.31e-43	8.83	1.04e-27
chr13-2	chr13	75800372	75800514	+	10.7	0.765	46	46	2.3	20.06	7.31e-43	16.87	1.4e-39
chr14-46	chr14	55575088	55575230	+	10.7	0.724	46	46	10.7	4.3	1.19e-15	6.33	6.33e-22
chr14-44	chr14	77770076	77770218	+	10.7	0.694	47	46	6.9	6.69	7.35e-23	9.34	3.99e-28
chr14-45	chr14	90422886	90423028	+	10.7	0.743	47	46	6.9	6.69	7.35e-23	11.01	1.12e-31
chr15-4	chr15	40074999	40075141	+	10.7	0.769	47	46	3.1	15.05	1.93e-37	14.41	1.23e-36
chr15-5	chr15	67467491	67467633	+	10.7	0.838	46	46	3.1	15.05	1.93e-37	14.77	2.51e-36
chr15-8	chr15	89787108	89787250	+	10.7	0.779	43	46	3.1	15.05	1.93e-37	16.18	8.48e-39
chr17-59	chr17	2310345	2310487	+	10.7	0.785	48	46	6.1	7.52	6.87e-25	7.04	8.95e-23
chr17-72	chr17	7155304	7155446	+	10.7	0.729	45	46	4.6	10.03	5.47e-30	8.05	4.56e-26
chr17-54	chr17	17315745	17315887	+	10.7	0.746	49	47	3.8	12.3	2.13e-34	8.59	3.19e-27
chr17-56	chr17	36062826	36062968	+	10.7	0.8	49	47	3.1	15.37	1.26e-38	10.86	2e-31
chr17-57	chr17	38459343	38459485	+	10.7	0.679	49	47	3.1	15.37	1.26e-38	8.59	3.19e-27
chr17-70	chr17	47865914	47866056	+	10.7	0.662	46	46	1.5	30.09	1.22e-50	11.97	3.38e-33
chr18-28	chr18	33889579	33889721	+	10.7	0.671	48	46	6.9	6.69	7.35e-23	9.3	1.26e-28
chr19-100	chr19	10538893	10539035	+	10.7	0.695	47	46	8.4	5.47	1.69e-19	6.01	4.83e-21
chr19-121	chr19	11489409	11489551	+	10.7	0.697	45	46	9.2	5.02	4.4e-18	5.26	7.53e-19
chr19-102	chr19	13148078	13148220	+	10.7	0.708	47	47	6.9	6.83	1.07e-23	6.37	5.01e-22
chr19-104	chr19	16272819	16272961	+	10.7	0.706	47	47	6.9	6.83	1.07e-23	5.56	2.29e-19
chr19-135	chr19	16796184	16796326	+	10.7	0.671	44	46	3.1	15.05	1.93e-37	7.32	2.02e-24
chr19-79	chr19	17889041	17889183	+	10.7	0.741	51	48	6.9	6.98	1.53e-24	5.32	4.86e-19
chr19-105	chr19	41220990	41221132	+	10.7	0.688	47	46	6.1	7.52	6.87e-25	7.13	1.77e-23
chr19-129	chr19	45188477	45188619	+	10.7	0.688	45	46	5.4	8.6	3.12e-27	8.05	4.56e-26
chr19-106	chr19	45542696	45542838	+	10.7	0.713	47	46	3.1	15.05	1.93e-37	8.78	1.3e-27
chr19-107	chr19	49217309	49217451	+	10.7	0.667	47	46	4.6	10.03	5.47e-30	9.64	2.87e-29
chr19-130	chr19	56110955	56111097	+	10.7	0.691	45	46	3.8	12.04	2.63e-33	7.33	5.97e-24
chr20-52	chr20	10492213	10492355	+	10.7	0.684	47	46	4.6	10.03	5.47e-30	11.49	1.88e-32
chr20-54	chr20	30162161	30162303	+	10.7	0.591	47	46	6.1	7.52	6.87e-25	6.37	1.37e-21
chr20-62	chr20	57586256	57586398	+	10.7	0.76	46	46	4.6	10.03	5.47e-30	10.2	1.13e-29
chr20-56	chr20	60495043	60495185	+	10.7	0.663	47	46	6.1	7.52	6.87e-25	6.63	2.99e-22
chr22-5	chr22	37172228	37172370	+	10.7	0.786	45	46	4.6	10.03	5.47e-30	15.54	4.77e-38
chrX-26	chrX	110284327	110284469	+	10.7	0.753	43	46	0.8	60.18	3.62e-64	17.81	1.3e-40
chr1-108	chr1	28974992	28975134	+	10.5	0.65	47	45	8.4	5.35	9.29e-19	11.36	1.38e-31
chr1-120	chr1	32757438	32757580	+	10.5	0.671	46	45	5.4	8.41	2.69e-26	9.29	5.08e-28
chr1-110	chr1	40839233	40839375	+	10.5	0.724	47	45	3.8	11.78	3.17e-32	14.7	3.07e-36
chr1-121	chr1	41128608	41128750	+	10.5	0.721	46	45	2.3	19.63	1.47e-41	10.1	1.68e-29
chr1-130	chr1	43855430	43855572	+	10.5	0.797	45	45	5.4	8.41	2.69e-26	10.49	1.54e-29
chr1-138	chr1	64164062	64164204	+	10.5	0.675	44	46	8.4	5.47	1.69e-19	8.02	6.86e-24
chr1-115	chr1	155246987	155247129	+	10.5	0.732	47	45	3.1	14.72	2.91e-36	11.04	4.52e-31
chr1-123	chr1	173837212	173837354	+	10.5	0.778	46	45	5.4	8.41	2.69e-26	14.29	9.95e-36
chr1-134	chr1	183573475	183573617	+	10.5	0.734	45	45	8.4	5.35	9.29e-19	12.46	3.09e-33
chr1-117	chr1	201505739	201505881	+	10.5	0.747	47	45	3.8	11.78	3.17e-32	8.38	1.1e-25
chr1-124	chr1	206848283	206848425	+	10.5	0.776	46	45	1.5	29.44	3.69e-49	10.32	3.04e-29
chr1-148	chr1	206982085	206982227	+	10.5	0.731	44	45	0.8	58.88	2.18e-62	12.07	1.14e-32
chr1-125	chr1	226085031	226085173	+	10.5	0.588	46	45	4.6	9.81	5.5e-29	9.1	1.17e-27
chr2-117	chr2	10592411	10592553	+	10.5	0.607	43	46	2.3	20.06	7.31e-43	11.84	2.54e-32
chr2-102	chr2	47053464	47053606	+	10.5	0.671	47	45	3.1	14.72	2.91e-36	9.15	9.24e-28
chr2-107	chr2	58334972	58335114	+	10.5	0.725	46	45	6.9	6.54	4.93e-22	12.36	4.3e-33
chr2-97	chr2	85999641	85999783	+	10.5	0.767	48	45	4.6	9.81	5.5e-29	6.28	2.36e-21
chr2-114	chr2	110086915	110087057	+	10.5	0.705	45	45	4.6	9.81	5.5e-29	12.41	3.64e-33
chr3-25	chr3	8707337	8707479	+	10.5	0.765	48	45	3.8	11.78	3.17e-32	13.2	2.78e-34
chr3-36	chr3	9404614	9404756	+	10.5	0.754	45	45	6.9	6.54	4.93e-22	10.59	2.5e-30
chr3-29	chr3	61560693	61560835	+	10.5	0.663	47	45	3.8	11.78	3.17e-32	10.04	2.19e-29
chr3-48	chr3	111570643	111570785	+	10.5	0.76	43	45	0.8	58.88	2.18e-62	18.69	1.19e-40
chr3-42	chr3	158846543	158846685	+	10.5	0.783	44	45	1.5	29.44	3.69e-49	17.04	4.06e-38
chr3-33	chr3	169477294	169477436	+	10.5	0.785	46	45	4.6	9.81	5.5e-29	14.84	2.06e-36
chr3-35	chr3	184052310	184052452	+	10.5	0.74	46	45	3.1	14.72	2.91e-36	8.57	1.28e-26
chr3-27	chr3	184354781	184354923	+	10.5	0.773	48	45	3.8	11.78	3.17e-32	7.23	1.03e-23
chr4-48	chr4	56753	56895	+	10.5	0.688	44	47	8.4	5.59	3.01e-20	4.26	1.34e-14
chr4-41	chr4	77468153	77468295	+	10.5	0.785	46	45	3.1	14.72	2.91e-36	9.1	1.17e-27
chr4-40	chr4	191032322	191032464	+	10.5	0.663	47	47	2.3	20.5	3.56e-44	9.43	2.77e-28
chr5-44	chr5	43313688	43313830	+	10.5	0.675	45	46	6.9	6.69	7.35e-23	14.36	8.2e-36
chr5-47	chr5	81121177	81121319	+	10.5	0.671	45	45	3.1	14.72	2.91e-36	11.4	1.19e-31
chr5-40	chr5	81653355	81653497	+	10.5	0.629	47	45	7.6	5.89	2.68e-20	7.75	6.68e-25
chr5-42	chr5	137800699	137800841	+	10.5	0.824	46	45	9.2	4.91	2.22e-17	7.26	8.62e-24
chr5-48	chr5	140700337	140700479	+	10.5	0.743	45	46	3.1	15.05	1.93e-37	17.33	2e-38
chr5-41	chr5	150022290	150022432	+	10.5	0.818	47	45	2.3	19.63	1.47e-41	12.16	8.28e-33
chr5-51	chr5	172167926	172168068	+	10.5	0.658	44	45	3.1	14.72	2.91e-36	11.24	2.16e-31
chr6-165	chr6	25006720	25006862	+	10.5	0.658	47	45	6.9	6.54	4.93e-22	6.89	6.6e-23
chr6-204	chr6	31125910	31126052	+	10.5	0.644	44	45	5.4	8.41	2.69e-26	7.1	2.12e-23
chr6-151	chr6	31213847	31213989	+	10.5	0.792	48	45	9.2	4.91	2.22e-17	20.82	1.17e-42
chr6-152	chr6	31939730	31939872	+	10.5	0.744	48	45	2.3	19.63	1.47e-41	5.31	1.23e-18
chr6-170	chr6	35369130	35369272	+	10.5	0.567	47	45	9.9	4.53	3.86e-16	4.03	2.26e-14
chr6-171	chr6	35435961	35436103	+	10.5	0.67	47	45	10.7	4.21	5.16e-15	4.74	7.48e-17
chr6-211	chr6	37172323	37172465	+	10.5	0.649	44	45	6.9	6.54	4.93e-22	4.37	1.37e-15
chr6-187	chr6	37322134	37322276	+	10.5	0.691	46	46	5.4	8.6	3.12e-27	5.23	2.16e-18
chr6-231	chr6	37836438	37836580	+	10.5	0.738	43	45	10.7	4.21	5.16e-15	6.44	9.23e-22
chr6-194	chr6	41909872	41910014	+	10.5	0.639	45	45	7.6	5.89	2.68e-20	5.48	3.89e-19
chr6-198	chr6	56224199	56224341	+	10.5	0.707	45	45	6.1	7.36	5.19e-24	9.15	9.24e-28
chr6-177	chr6	75918809	75918951	+	10.5	0.783	47	45	7.6	5.89	2.68e-20	8.86	3.33e-27
chr7-83	chr7	62019211	62019353	+	10.5	0.873	34	45	9.2	4.91	2.22e-17	5.04	8.16e-18
chr7-39	chr7	99102476	99102618	+	10.5	0.845	43	45	5.4	8.41	2.69e-26	16.33	3.69e-38
chr8-57	chr8	126936234	126936376	+	10.5	0.797	44	45	4.6	9.81	5.5e-29	7.57	1.76e-24
chr9-47	chr9	34989459	34989601	+	10.5	0.685	45	45	4.6	9.81	5.5e-29	7.47	2.83e-24
chr9-33	chr9	115950249	115950391	+	10.5	0.769	49	45	1.5	29.44	3.69e-49	14.77	2.51e-36
chr9-45	chr9	132779043	132779185	+	10.5	0.72	46	46	5.4	8.6	3.12e-27	14.04	1.18e-34
chr10-76	chr10	13924220	13924362	+	10.5	0.573	45	45	5.4	8.41	2.69e-26	8.91	2.65e-27
chr10-71	chr10	75910840	75910982	+	10.5	0.684	46	46	3.8	12.04	2.63e-33	7.85	4.07e-25
chr10-80	chr10	99355948	99356090	+	10.5	0.651	45	45	5.4	8.41	2.69e-26	10.14	5.96e-29
chr11-69	chr11	64052155	64052297	+	10.5	0.685	44	45	5.4	8.41	2.69e-26	10.96	6.05e-31
chr11-54	chr11	122513314	122513456	+	10.5	0.615	48	45	2.3	19.63	1.47e-41	9.75	7e-29
chr12-64	chr12	48135276	48135418	+	10.5	0.806	44	46	3.1	15.05	1.93e-37	11.88	2.16e-32
chr12-59	chr12	72057658	72057800	+	10.5	0.812	45	45	3.8	11.78	3.17e-32	21.1	6.57e-43
chr12-38	chr12	90341734	90341876	+	10.5	0.792	51	45	3.8	11.78	3.17e-32	14.23	1.21e-35
chr13-3	chr13	106808951	106809093	+	10.5	0.667	44	46	2.3	20.06	7.31e-43	14.36	8.2e-36
chr14-52	chr14	52295669	52295811	+	10.5	0.694	44	45	3.1	14.72	2.91e-36	4.63	3.76e-16
chr14-54	chr14	54317800	54317942	+	10.5	0.758	44	45	6.1	7.36	5.19e-24	12.71	1.33e-33
chr14-40	chr14	54863497	54863639	+	10.5	0.681	47	46	9.2	5.02	4.4e-18	9.46	2.45e-28
chr14-49	chr14	58765003	58765145	+	10.5	0.828	45	46	6.1	7.52	6.87e-25	11.24	2.16e-31
chr15-28	chr15	80445451	80445593	+	10.5	0.803	34	45	9.2	4.91	2.22e-17	14.48	1.13e-33
chr16-40	chr16	88280602	88280744	+	10.5	0.604	46	45	6.1	7.36	5.19e-24	6.48	7.27e-22
chr17-78	chr17	70598776	70598918	+	10.5	0.633	45	45	3.1	14.72	2.91e-36	8.69	2.65e-26
chr18-29	chr18	47376260	47376402	+	10.5	0.723	45	45	1.5	29.44	3.69e-49	14.24	6.65e-35
chr19-80	chr19	6863647	6863789	+	10.5	0.663	50	45	6.9	6.54	4.93e-22	8.2	2.57e-25
chr19-92	chr19	8488963	8489105	+	10.5	0.682	48	47	6.1	7.69	8.91e-26	8.33	1.36e-25
chr19-122	chr19	11670010	11670152	+	10.5	0.611	45	45	4.6	9.81	5.5e-29	7.21	1.13e-23
chr19-123	chr19	14800474	14800616	+	10.5	0.667	45	45	3.8	11.78	3.17e-32	8.55	1.43e-26
chr19-89	chr19	38878331	38878473	+	10.5	0.652	49	45	4.6	9.81	5.5e-29	6.25	2.75e-21
chr19-126	chr19	39938990	39939132	+	10.5	0.707	45	45	4.6	9.81	5.5e-29	5.44	5.04e-19
chr19-140	chr19	47033399	47033541	+	10.5	0.711	44	46	8.4	5.47	1.69e-19	10.76	5.77e-30
chr19-115	chr19	48857966	48858108	+	10.5	0.637	46	45	4.6	9.81	5.5e-29	8.32	4.21e-26
chr20-58	chr20	32077626	32077768	+	10.5	0.779	46	45	6.1	7.36	5.19e-24	11.08	3.91e-31
chr20-65	chr20	35580151	35580293	+	10.5	0.753	45	45	6.1	7.36	5.19e-24	8.5	6.4e-26
chr20-69	chr20	49971544	49971686	+	10.5	0.663	45	46	6.9	6.69	7.35e-23	5.33	2.59e-18
chr1-127	chr1	32398170	32398312	+	10.3	0.844	45	44	5.4	8.22	2.27e-25	11.49	4.09e-31
chr1-151	chr1	39657931	39658073	+	10.3	0.776	43	44	5.4	8.22	2.27e-25	10.76	5.77e-30
chr1-129	chr1	43406674	43406816	+	10.3	0.753	45	44	5.4	8.22	2.27e-25	8.64	3.31e-26
chr1-131	chr1	63156106	63156248	+	10.3	0.781	45	45	4.6	9.81	5.5e-29	15.47	2.18e-36
chr1-141	chr1	101096659	101096801	+	10.3	0.57	44	44	3.1	14.39	4.3e-35	9.54	6.85e-28
chr1-132	chr1	151254434	151254576	+	10.3	0.805	45	44	6.9	6.4	3.24e-21	8.79	1.69e-26
chr1-157	chr1	219884084	219884226	+	10.3	0.671	43	44	3.1	14.39	4.3e-35	11.27	8.69e-31
chr2-119	chr2	65781913	65782055	+	10.3	0.6	43	44	5.4	8.22	2.27e-25	7.96	7.99e-25
chr3-24	chr3	8535039	8535181	+	10.3	0.775	48	44	2.3	19.19	2.88e-40	9.6	5.34e-28
chr3-40	chr3	11182044	11182186	+	10.3	0.711	44	44	3.8	11.51	3.74e-31	7.92	9.78e-25
chr3-28	chr3	11267567	11267709	+	10.3	0.781	47	44	6.1	7.2	3.83e-23	13.42	7.5e-34
chr3-46	chr3	11420860	11421002	+	10.3	0.739	43	44	3.1	14.39	4.3e-35	13.48	6.26e-34
chr4-39	chr4	38162151	38162293	+	10.3	0.708	47	44	6.9	6.4	3.24e-21	8.59	4.13e-26
chr4-43	chr4	100777463	100777605	+	10.3	0.776	46	44	3.8	11.51	3.74e-31	13.13	1.83e-33
chr4-47	chr4	110981058	110981200	+	10.3	0.645	45	44	4.6	9.59	5.41e-28	15.16	5.01e-36
chr4-44	chr4	127771605	127771747	+	10.3	0.831	46	44	8.4	5.23	5e-18	19.69	9.73e-41
chr5-53	chr5	73612196	73612338	+	10.3	0.587	43	44	3.8	11.51	3.74e-31	8.47	2.57e-25
chr5-49	chr5	137514242	137514384	+	10.3	0.818	44	44	4.6	9.59	5.41e-28	10.49	1.54e-29
chr6-180	chr6	12014744	12014886	+	10.3	0.714	46	44	6.9	6.4	3.24e-21	9.72	3.22e-28
chr6-202	chr6	14271497	14271639	+	10.3	0.611	44	44	4.6	9.59	5.41e-28	5.47	9.87e-19
chr6-189	chr6	31782506	31782648	+	10.3	0.77	45	44	9.9	4.43	1.76e-15	8.4	9.88e-26
chr6-191	chr6	37039670	37039812	+	10.3	0.658	45	44	6.9	6.4	3.24e-21	5.35	2.28e-18
chr6-213	chr6	43149312	43149454	+	10.3	0.596	44	44	4.6	9.59	5.41e-28	4.44	1.6e-15
chr6-197	chr6	55965975	55966117	+	10.3	0.636	45	44	6.9	6.4	3.24e-21	13.3	1.07e-33
chr7-30	chr7	100136390	100136532	+	10.3	0.753	48	44	3.1	14.39	4.3e-35	11.23	1.01e-30
chr7-35	chr7	157863568	157863710	+	10.3	0.726	45	44	1.5	28.78	1.09e-47	6.44	2.52e-21
chr7-40	chr7	158574959	158575101	+	10.3	0.634	43	45	3.8	11.78	3.17e-32	6.83	8.16e-22
chr8-44	chr8	128093162	128093304	+	10.3	0.553	48	44	9.9	4.43	1.76e-15	10.49	1.54e-29
chr8-56	chr8	142238073	142238215	+	10.3	0.708	45	44	4.6	9.59	5.41e-28	8.26	1.87e-25
chr9-48	chr9	124855610	124855752	+	10.3	0.82	45	44	4.6	9.59	5.41e-28	11.03	2.11e-30
chr9-56	chr9	130795528	130795670	+	10.3	0.85	43	44	3.1	14.39	4.3e-35	10.01	1.01e-28
chr10-69	chr10	21554666	21554808	+	10.3	0.764	46	44	4.6	9.59	5.41e-28	10.28	3.49e-29
chr10-86	chr10	71259026	71259168	+	10.3	0.75	44	44	6.9	6.4	3.24e-21	9.88	6.89e-28
chr10-72	chr10	93412246	93412388	+	10.3	0.706	46	44	4.6	9.59	5.41e-28	12.96	3.09e-33
chr10-73	chr10	95228437	95228579	+	10.3	0.635	46	45	3.8	11.78	3.17e-32	8.54	5.15e-26
chr10-68	chr10	114143224	114143366	+	10.3	0.763	47	44	2.3	19.19	2.88e-40	8.36	1.22e-25
chr10-114	chr10	135460768	135460910	+	10.3	0.958	40	44	3.1	14.39	4.3e-35	44.6	7.72e-56
chr11-58	chr11	33654971	33655113	+	10.3	0.643	46	45	1.5	29.44	3.69e-49	11.4	5.54e-31
chr11-48	chr11	46144648	46144790	+	10.3	0.739	49	44	3.1	14.39	4.3e-35	6.72	4.96e-22
chr11-70	chr11	67780809	67780951	+	10.3	0.732	44	44	6.1	7.2	3.83e-23	7.22	3.35e-23
chr12-61	chr12	111273291	111273433	+	10.3	0.731	45	44	4.6	9.59	5.41e-28	10.95	2.82e-30
chr13-4	chr13	21951636	21951778	+	10.3	0.92	43	44	7.6	5.76	1.59e-19	21.66	1.79e-42
chr13-1	chr13	98085224	98085366	+	10.3	0.709	47	44	1.5	28.78	1.09e-47	16.22	3.13e-37
chr14-63	chr14	101132057	101132199	+	10.3	0.655	42	44	6.1	7.2	3.83e-23	8.62	3.7e-26
chr15-2	chr15	69871351	69871493	+	10.3	0.733	51	45	5.4	8.41	2.69e-26	7.96	7.99e-25
chr15-6	chr15	73680853	73680995	+	10.3	0.776	44	44	3.8	11.51	3.74e-31	13.07	2.18e-33
chr16-41	chr16	67345828	67345970	+	10.3	0.757	44	44	5.4	8.22	2.27e-25	11.71	1.89e-31
chr16-42	chr16	67891752	67891894	+	10.3	0.659	44	44	2.3	19.19	2.88e-40	10.04	8.86e-29
chr16-44	chr16	89647886	89648028	+	10.3	0.709	44	44	6.9	6.4	3.24e-21	11.99	7.34e-32
chr17-95	chr17	71776	71918	+	10.3	0.855	42	44	6.9	6.4	3.24e-21	7.68	3.21e-24
chr17-73	chr17	7518532	7518674	+	10.3	0.685	45	44	3.8	11.51	3.74e-31	9.66	4.15e-28
chr17-74	chr17	19550486	19550628	+	10.3	0.768	45	44	2.3	19.19	2.88e-40	12.28	2.78e-32
chr17-76	chr17	28804358	28804500	+	10.3	0.792	45	44	5.4	8.22	2.27e-25	11.99	7.34e-32
chr17-81	chr17	43248820	43248962	+	10.3	0.781	44	44	2.3	19.19	2.88e-40	8.02	5.88e-25
chr17-77	chr17	43565201	43565343	+	10.3	0.72	45	44	3.8	11.51	3.74e-31	13.79	2.5e-34
chr17-69	chr17	46969812	46969954	+	10.3	0.477	46	44	5.4	8.22	2.27e-25	10.21	4.56e-29
chr17-92	chr17	76286029	76286171	+	10.3	0.729	43	44	5.4	8.22	2.27e-25	14.05	6.51e-34
chr18-32	chr18	30241981	30242123	+	10.3	0.658	42	44	4.6	9.59	5.41e-28	16.94	3.48e-37
chr18-31	chr18	33952796	33952938	+	10.3	0.693	44	44	3.8	11.51	3.74e-31	11.44	4.76e-31
chr18-30	chr18	55785381	55785523	+	10.3	0.781	45	44	4.6	9.59	5.41e-28	18.72	8.07e-40
chr19-109	chr19	879730	879872	+	10.3	0.787	46	44	6.1	7.2	3.83e-23	8.64	3.31e-26
chr19-132	chr19	11253359	11253501	+	10.3	0.773	44	44	5.4	8.22	2.27e-25	6.02	3.12e-20
chr19-112	chr19	15562992	15563134	+	10.3	0.659	46	44	5.4	8.22	2.27e-25	4.84	7.72e-17
chr19-103	chr19	16189419	16189561	+	10.3	0.625	47	44	8.4	5.23	5e-18	5.87	7.95e-20
chr19-145	chr19	17619038	17619180	+	10.3	0.746	43	44	7.6	5.76	1.59e-19	6.24	8.11e-21
chr19-127	chr19	41283986	41284128	+	10.3	0.558	45	45	5.4	8.41	2.69e-26	6.16	1.28e-20
chr19-114	chr19	47852399	47852541	+	10.3	0.72	46	44	1.5	28.78	1.09e-47	9.88	6.89e-28
chr20-68	chr20	49963658	49963800	+	10.3	0.588	45	44	5.4	8.22	2.27e-25	5.01	2.31e-17
chr22-6	chr22	21910393	21910535	+	10.3	0.747	43	44	5.4	8.22	2.27e-25	20.22	3.23e-41
chrX-23	chrX	47696200	47696342	+	10.3	0.773	46	44	2.3	19.19	2.88e-40	20.09	4.27e-41
chrX-24	chrX	130927110	130927252	+	10.3	0.812	46	44	1.5	28.78	1.09e-47	21.82	1.32e-42
chr1-128	chr1	33458218	33458360	+	10	0.753	45	43	4.6	9.38	5.2e-27	8.19	9.25e-25
chr1-109	chr1	33502509	33502651	+	10	0.795	47	43	3.8	11.25	4.32e-30	10.12	1.12e-27
chr1-140	chr1	93285646	93285788	+	10	0.757	44	43	8.4	5.11	2.63e-17	10.62	4.09e-29
chr1-142	chr1	149860149	149860291	+	10	0.62	44	43	4.6	9.38	5.2e-27	6.6	2.85e-21
chr1-143	chr1	150602127	150602269	+	10	0.688	44	43	3.8	11.25	4.32e-30	8.62	1.33e-25
chr1-133	chr1	152025180	152025322	+	10	0.79	45	43	3.1	14.06	6.19e-34	8.98	2.72e-26
chr1-159	chr1	232674084	232674226	+	10	0.793	43	43	1.5	28.13	3.13e-46	13.47	3.45e-33
chr1-170	chr1	235324507	235324649	+	10	0.71	42	43	5.4	8.04	1.87e-24	14.46	2.05e-34
chr2-112	chr2	69869793	69869935	+	10	0.771	45	43	3.8	11.25	4.32e-30	9.12	1.51e-26
chr2-121	chr2	98485855	98485997	+	10	0.707	43	43	6.1	7.03	2.77e-22	9.72	1.31e-27
chr3-41	chr3	45175345	45175487	+	10	0.7	44	43	3.8	11.25	4.32e-30	10.19	2.11e-28
chr3-55	chr3	171002276	171002418	+	10	0.662	42	43	2.3	18.75	5.54e-39	14.18	4.44e-34
chr3-45	chr3	194494031	194494173	+	10	0.75	44	43	8.4	5.11	2.63e-17	10.33	1.23e-28
chr3-49	chr3	195443779	195443921	+	10	0.743	43	43	6.1	7.03	2.77e-22	9.2	1.06e-26
chr3-50	chr3	197033349	197033491	+	10	0.814	43	43	2.3	18.75	5.54e-39	11.58	1.4e-30
chr4-49	chr4	129208998	129209140	+	10	0.611	43	43	2.3	18.75	5.54e-39	9.52	1.13e-26
chr5-55	chr5	141768393	141768535	+	10	0.69	43	43	2.3	18.75	5.54e-39	8.72	8.52e-26
chr6-217	chr6	15289735	15289877	+	10	0.769	43	43	6.9	6.25	2.08e-20	10.15	2.41e-28
chr6-182	chr6	20401890	20402032	+	10	0.678	46	43	6.9	6.25	2.08e-20	6.62	2.62e-21
chr6-219	chr6	28109533	28109675	+	10	0.621	43	43	4.6	9.38	5.2e-27	7.68	1.04e-23
chr6-281	chr6	31619703	31619845	+	10	0.693	40	43	6.9	6.25	2.08e-20	5.67	1.8e-18
chr6-224	chr6	35383017	35383159	+	10	0.579	43	43	9.9	4.33	7.84e-15	4.33	7.5e-15
chr6-228	chr6	35944751	35944893	+	10	0.619	43	43	9.9	4.33	7.84e-15	6.01	8.52e-20
chr6-208	chr6	36592847	36592989	+	10	0.718	44	43	3.1	14.06	6.19e-34	4.07	1.19e-13
chr6-192	chr6	37140006	37140148	+	10	0.587	45	43	9.2	4.69	5.27e-16	6	9.16e-20
chr6-175	chr6	43089049	43089191	+	10	0.656	47	44	9.2	4.8	1.09e-16	4.7	4.94e-16
chr6-195	chr6	44649689	44649831	+	10	0.68	45	44	6.1	7.2	3.83e-23	6.8	9.67e-22
chr8-61	chr8	25761310	25761452	+	10	0.864	42	43	3.8	11.25	4.32e-30	14.89	6.22e-35
chr8-55	chr8	103922190	103922332	+	10	0.704	45	43	2.3	18.75	5.54e-39	7.5	2.47e-23
chr9-46	chr9	34458735	34458877	+	10	0.643	45	43	4.6	9.38	5.2e-27	7.21	1.09e-22
chr9-51	chr9	74398358	74398500	+	10	0.679	44	44	3.1	14.39	4.3e-35	12.61	4.76e-32
chr9-52	chr9	74930755	74930897	+	10	0.532	44	43	6.1	7.03	2.77e-22	10.7	3.09e-29
chr9-59	chr9	130681931	130682073	+	10	0.69	42	43	6.1	7.03	2.77e-22	9.69	1.48e-27
chr9-53	chr9	135383107	135383249	+	10	0.778	44	44	6.1	7.2	3.83e-23	12.15	2.11e-31
chr10-82	chr10	31288404	31288546	+	10	0.794	44	43	4.6	9.38	5.2e-27	11.76	7.54e-31
chr10-78	chr10	69913514	69913656	+	10	0.571	45	43	4.6	9.38	5.2e-27	11.02	9.82e-30
chr10-79	chr10	76587026	76587168	+	10	0.645	45	43	0.8	56.26	7.38e-59	7.66	1.15e-23
chr11-65	chr11	10830583	10830725	+	10	0.7	44	43	5.4	8.04	1.87e-24	10.51	6.22e-29
chr11-72	chr11	125496490	125496632	+	10	0.63	44	43	3.1	14.06	6.19e-34	12.25	1.52e-31
chr12-94	chr12	94376854	94376996	+	10	0.774	40	43	3.1	14.06	6.19e-34	12.1	2.48e-31
chr12-52	chr12	95867765	95867907	+	10	0.692	47	44	6.1	7.2	3.83e-23	6.56	9.92e-21
chr12-66	chr12	111051800	111051942	+	10	0.667	44	43	9.9	4.33	7.84e-15	8.42	3.19e-25
chr12-72	chr12	113478647	113478789	+	10	0.688	43	43	8.4	5.11	2.63e-17	11.23	4.7e-30
chr12-74	chr12	120685391	120685533	+	10	0.622	43	43	1.5	28.13	3.13e-46	6.1	5.08e-20
chr12-90	chr12	123574316	123574458	+	10	0.804	41	43	3.8	11.25	4.32e-30	6.1	5.08e-20
chr14-58	chr14	52766568	52766710	+	10	0.731	43	43	6.1	7.03	2.77e-22	8	7.59e-24
chr14-64	chr14	53173149	53173291	+	10	0.769	41	43	5.4	8.04	1.87e-24	7.78	2.07e-23
chr14-60	chr14	91703689	91703831	+	10	0.764	43	43	6.9	6.25	2.08e-20	9.65	1.68e-27
chr17-85	chr17	16390064	16390206	+	10	0.685	43	43	6.9	6.25	2.08e-20	9.81	3.62e-27
chr17-86	chr17	27046411	27046553	+	10	0.598	43	43	3.8	11.25	4.32e-30	5.1	2.87e-17
chr17-80	chr17	41150321	41150463	+	10	0.75	44	43	4.6	9.38	5.2e-27	12	3.42e-31
chr17-147	chr17	41813947	41814089	+	10	0.783	38	43	3.8	11.25	4.32e-30	9.18	1.19e-26
chr17-58	chr17	42264135	42264277	+	10	0.694	49	43	6.9	6.25	2.08e-20	11.72	8.81e-31
chr17-71	chr17	73043036	73043178	+	10	0.807	46	43	6.1	7.03	2.77e-22	13.6	2.4e-33
chr19-117	chr19	1812751	1812893	+	10	0.71	45	43	3.1	14.06	6.19e-34	11.35	1.4e-29
chr19-131	chr19	7069107	7069249	+	10	0.641	44	43	4.6	9.38	5.2e-27	9.15	1.34e-26
chr19-118	chr19	7936605	7936747	+	10	0.604	45	44	2.3	19.19	2.88e-40	5.76	4.08e-19
chr19-119	chr19	7985631	7985773	+	10	0.63	45	44	3.1	14.39	4.3e-35	6.53	4.27e-21
chr19-142	chr19	9938476	9938618	+	10	0.757	43	43	8.4	5.11	2.63e-17	7.95	2.87e-24
chr19-111	chr19	14495172	14495314	+	10	0.627	46	43	2.3	18.75	5.54e-39	5.77	3.81e-19
chr19-139	chr19	40971839	40971981	+	10	0.684	44	43	3.8	11.25	4.32e-30	8.19	9.25e-25
chr19-148	chr19	49955114	49955256	+	10	0.627	43	43	9.2	4.69	5.27e-16	8.26	6.75e-25
chr20-71	chr20	30697184	30697326	+	10	0.743	44	43	6.9	6.25	2.08e-20	9.1	6.12e-26
chr20-75	chr20	31240811	31240953	+	10	0.644	43	43	5.4	8.04	1.87e-24	11.31	3.49e-30
chr20-63	chr20	33900256	33900398	+	10	0.754	45	43	4.6	9.38	5.2e-27	7.11	1.86e-22
chr20-66	chr20	44411637	44411779	+	10	0.58	45	43	6.9	6.25	2.08e-20	4.72	4.2e-16
chr20-61	chr20	44992540	44992682	+	10	0.736	46	43	0.8	56.26	7.38e-59	8.42	3.19e-25
chr20-80	chr20	48585413	48585555	+	10	0.722	43	43	1.5	28.13	3.13e-46	8.4	3.56e-25
chr20-98	chr20	57623099	57623241	+	10	0.746	40	43	3.8	11.25	4.32e-30	9.91	6.06e-28
chr21-33	chr21	44914603	44914745	+	10	0.753	45	43	0.8	56.26	7.38e-59	8.77	6.8e-26
chr1-136	chr1	22110088	22110230	+	9.8	0.684	44	42	7.6	5.5	5.19e-18	11.13	2.95e-29
chr1-162	chr1	26704535	26704677	+	9.8	0.658	42	43	7.6	5.63	9.18e-19	8.02	6.86e-24
chr1-126	chr1	31327070	31327212	+	9.8	0.757	45	42	3.1	13.74	8.72e-33	8.19	1.08e-23
chr1-153	chr1	53168665	53168807	+	9.8	0.8	43	42	4.6	9.16	4.89e-26	9.15	1.95e-25
chr1-163	chr1	66781417	66781559	+	9.8	0.8	42	42	6.1	6.87	1.95e-21	13.34	2.73e-32
chr1-139	chr1	68578775	68578917	+	9.8	0.727	44	42	4.6	9.16	4.89e-26	13.99	4.34e-33
chr1-144	chr1	152020518	152020660	+	9.8	0.663	44	42	1.5	27.48	8.81e-45	8.27	2.18e-24
chr1-167	chr1	160886586	160886728	+	9.8	0.688	42	42	3.1	13.74	8.72e-33	11.44	1.03e-29
chr1-146	chr1	201458423	201458565	+	9.8	0.718	44	42	5.4	7.85	1.51e-23	9.91	2.46e-27
chr1-156	chr1	204386943	204387085	+	9.8	0.718	43	42	6.1	6.87	1.95e-21	6.91	1.58e-21
chr1-171	chr1	236072065	236072207	+	9.8	0.695	42	42	2.3	18.32	1.04e-37	9.4	1.84e-26
chr2-118	chr2	10725064	10725206	+	9.8	0.667	43	42	4.6	9.16	4.89e-26	8.91	1.38e-25
chr2-124	chr2	17652732	17652874	+	9.8	0.662	42	42	5.4	7.85	1.51e-23	13.79	7.61e-33
chr2-111	chr2	19911379	19911521	+	9.8	0.762	45	43	3.8	11.25	4.32e-30	10.16	9.79e-28
chr2-125	chr2	38099089	38099231	+	9.8	0.729	42	42	4.6	9.16	4.89e-26	8.44	1.03e-24
chr2-95	chr2	47497020	47497162	+	9.8	0.678	48	42	3.1	13.74	8.72e-33	8.67	3.84e-25
chr2-132	chr2	64019792	64019934	+	9.8	0.734	41	42	3.1	13.74	8.72e-33	16.43	5.02e-35
chr2-175	chr2	66656238	66656380	+	9.8	0.776	37	42	3.1	13.74	8.72e-33	14.26	2.02e-33
chr2-129	chr2	86332643	86332785	+	9.8	0.726	42	42	3.1	13.74	8.72e-33	8.25	2.43e-24
chr3-32	chr3	48481549	48481691	+	9.8	0.783	46	42	2.3	18.32	1.04e-37	6.94	1.33e-21
chr4-50	chr4	167064463	167064605	+	9.8	0.788	43	42	5.4	7.85	1.51e-23	18.56	6.18e-38
chr5-50	chr5	159247144	159247286	+	9.8	0.551	44	42	5.4	7.85	1.51e-23	7.85	1.54e-23
chr5-63	chr5	174673330	174673472	+	9.8	0.587	42	42	3.8	10.99	4.87e-29	7.52	2.37e-22
chr5-64	chr5	175866107	175866249	+	9.8	0.654	42	42	6.9	6.11	1.31e-19	10.76	1.08e-28
chr6-238	chr6	7390627	7390769	+	9.8	0.612	42	42	4.6	9.16	4.89e-26	10.09	5.18e-27
chr6-203	chr6	25173171	25173313	+	9.8	0.73	44	42	7.6	5.5	5.19e-18	7.15	4.61e-22
chr6-220	chr6	29617891	29618033	+	9.8	0.753	43	42	8.4	5	1.35e-16	8.18	3.33e-24
chr6-226	chr6	35574029	35574171	+	9.8	0.718	43	42	7.6	5.5	5.19e-18	6.08	1.5e-19
chr6-209	chr6	36612462	36612604	+	9.8	0.646	44	43	5.4	8.04	1.87e-24	5.39	1e-17
chr6-249	chr6	42734201	42734343	+	9.8	0.677	42	42	9.9	4.23	3.42e-14	4.14	6.59e-14
chr6-232	chr6	43132116	43132258	+	9.8	0.63	43	43	5.4	8.04	1.87e-24	4.13	7.23e-14
chr6-268	chr6	64281725	64281867	+	9.8	0.797	41	42	6.9	6.11	1.31e-19	12.87	1.12e-31
chr6-236	chr6	75985024	75985166	+	9.8	0.714	43	43	3.8	11.25	4.32e-30	13.85	6.31e-33
chr7-44	chr7	37274608	37274750	+	9.8	0.849	41	42	3.1	13.74	8.72e-33	23.73	3.28e-42
chr8-84	chr8	119102126	119102268	+	9.8	0.774	39	43	6.9	6.25	2.08e-20	12.64	2.21e-31
chr8-59	chr8	124549996	124550138	+	9.8	0.716	43	42	4.6	9.16	4.89e-26	7.18	3.86e-22
chr8-53	chr8	146055475	146055617	+	9.8	0.756	46	43	6.1	7.03	2.77e-22	7.48	8.82e-23
chr9-49	chr9	38380308	38380450	+	9.8	0.804	44	42	1.5	27.48	8.81e-45	11.44	1.03e-29
chr9-68	chr9	101026144	101026286	+	9.8	0.789	41	42	2.3	18.32	1.04e-37	13.04	6.62e-32
chr9-69	chr9	115983671	115983813	+	9.8	0.706	41	42	5.4	7.85	1.51e-23	10.35	2.02e-27
chr10-93	chr10	22971246	22971388	+	9.8	0.754	42	42	3.1	13.74	8.72e-33	9.75	4.67e-27
chr10-83	chr10	32428389	32428531	+	9.8	0.732	44	44	4.6	9.59	5.41e-28	11.31	1.63e-29
chr10-88	chr10	102775055	102775197	+	9.8	0.734	44	42	3.1	13.74	8.72e-33	7.8	1.88e-23
chr11-73	chr11	10582624	10582766	+	9.8	0.676	43	43	0.8	56.26	7.38e-59	14.95	1.88e-33
chr11-90	chr11	74747167	74747309	+	9.8	0.649	41	42	1.5	27.48	8.81e-45	8.34	1.59e-24
chr11-64	chr11	86454987	86455129	+	9.8	0.74	45	42	3.8	10.99	4.87e-29	6.56	9.92e-21
chr11-78	chr11	118663587	118663729	+	9.8	0.726	42	42	3.8	10.99	4.87e-29	10.38	4.36e-28
chr12-48	chr12	28176540	28176682	+	9.8	0.776	47	43	2.3	18.75	5.54e-39	16.36	9.24e-36
chr12-73	chr12	117354706	117354848	+	9.8	0.738	43	42	4.6	9.16	4.89e-26	8.34	1.59e-24
chr12-68	chr12	120672682	120672824	+	9.8	0.585	44	44	0.8	57.57	1.28e-60	4.3	1.93e-14
chr12-88	chr12	122949010	122949152	+	9.8	0.722	41	42	3.1	13.74	8.72e-33	8.32	1.77e-24
chr12-79	chr12	122985515	122985657	+	9.8	0.773	42	42	7.6	5.5	5.19e-18	8.54	6.67e-25
chr13-5	chr13	43294630	43294772	+	9.8	0.714	43	42	4.6	9.16	4.89e-26	13.59	1.32e-32
chr14-56	chr14	25165774	25165916	+	9.8	0.604	43	42	0.8	54.95	4.15e-57	5.13	5.38e-17
chr14-78	chr14	68973576	68973718	+	9.8	0.536	39	42	9.2	4.58	2.49e-15	7.29	2.23e-22
chr15-7	chr15	69702749	69702891	+	9.8	0.81	43	42	4.6	9.16	4.89e-26	14.19	2.45e-33
chr15-9	chr15	76013603	76013745	+	9.8	0.714	42	42	3.8	10.99	4.87e-29	17.76	3.54e-37
chr16-103	chr16	35248937	35249079	+	9.8	0.815	31	42	9.9	4.23	3.42e-14	14.33	1.67e-33
chr16-43	chr16	75019118	75019260	+	9.8	0.79	44	42	4.6	9.16	4.89e-26	13.99	4.34e-33
chr16-47	chr16	84538416	84538558	+	9.8	0.8	43	43	6.9	6.25	2.08e-20	8.91	1.38e-25
chr17-99	chr17	41323059	41323201	+	9.8	0.706	42	42	2.3	18.32	1.04e-37	7.93	1.03e-23
chr17-90	chr17	46560874	46561016	+	9.8	0.654	43	42	6.1	6.87	1.95e-21	7.15	4.61e-22
chr17-101	chr17	49230856	49230998	+	9.8	0.7	42	42	3.8	10.99	4.87e-29	9.71	5.3e-27
chr17-102	chr17	56469070	56469212	+	9.8	0.627	42	42	2.3	18.32	1.04e-37	12.7	1.86e-31
chr17-103	chr17	74868941	74869083	+	9.8	0.803	42	42	5.4	7.85	1.51e-23	9.48	5.17e-26
chr17-94	chr17	78193347	78193489	+	9.8	0.708	43	42	0.8	54.95	4.15e-57	9.34	2.35e-26
chr19-141	chr19	680993	681135	+	9.8	0.767	43	42	3.8	10.99	4.87e-29	14.12	2.97e-33
chr19-160	chr19	4208433	4208575	+	9.8	0.763	41	42	4.6	9.16	4.89e-26	15.08	2.28e-34
chr19-149	chr19	8943500	8943642	+	9.8	0.646	42	43	3.8	11.25	4.32e-30	8.57	5.98e-25
chr19-143	chr19	11750436	11750578	+	9.8	0.75	43	43	4.6	9.38	5.2e-27	10.49	2.89e-28
chr19-133	chr19	12662312	12662454	+	9.8	0.63	44	43	6.1	7.03	2.77e-22	5.83	6.82e-19
chr19-134	chr19	12674943	12675085	+	9.8	0.663	44	42	6.1	6.87	1.95e-21	7.42	1.17e-22
chr19-152	chr19	13957439	13957581	+	9.8	0.675	42	42	6.9	6.11	1.31e-19	5.37	1.14e-17
chr19-124	chr19	17208472	17208614	+	9.8	0.658	45	42	6.1	6.87	1.95e-21	5.96	3.11e-19
chr19-137	chr19	17457006	17457148	+	9.8	0.619	44	42	8.4	5	1.35e-16	5.3	1.77e-17
chr19-125	chr19	17671228	17671370	+	9.8	0.65	45	43	3.8	11.25	4.32e-30	6.03	2.01e-19
chr19-156	chr19	18668465	18668607	+	9.8	0.77	42	42	4.6	9.16	4.89e-26	5.85	3.84e-18
chr19-169	chr19	57862526	57862668	+	9.8	0.839	41	42	4.6	9.16	4.89e-26	10.06	5.91e-27
chr20-76	chr20	31366401	31366543	+	9.8	0.637	43	42	7.6	5.5	5.19e-18	9.43	1.63e-26
chr20-60	chr20	33461923	33462065	+	9.8	0.831	46	42	3.8	10.99	4.87e-29	4.71	9.94e-16
chr20-64	chr20	35233930	35234072	+	9.8	0.787	45	42	5.4	7.85	1.51e-23	6.7	1.41e-20
chr20-83	chr20	48963126	48963268	+	9.8	0.711	42	42	6.1	6.87	1.95e-21	6.24	6.07e-20
chr20-81	chr20	49255010	49255152	+	9.8	0.682	43	42	3.8	10.99	4.87e-29	8.18	3.33e-24
chr21-39	chr21	40493987	40494129	+	9.8	0.645	43	42	1.5	27.48	8.81e-45	11.67	4.8e-30
chr1-106	chr1	27618715	27618857	+	9.57	0.784	47	42	3.1	13.74	8.72e-33	9.1	8.91e-25
chr1-177	chr1	154946991	154947133	+	9.57	0.758	41	41	7.6	5.36	2.87e-17	7.17	1.25e-21
chr1-178	chr1	156896141	156896283	+	9.57	0.632	41	41	1.5	26.82	2.42e-43	7.34	5.5e-22
chr1-181	chr1	170043829	170043971	+	9.57	0.754	41	41	2.3	17.88	1.91e-36	13.79	4.2e-32
chr1-145	chr1	172224217	172224359	+	9.57	0.766	44	41	5.4	7.66	1.19e-22	12.56	1.44e-30
chr1-169	chr1	224811676	224811818	+	9.57	0.725	42	41	3.8	10.73	5.36e-28	7.92	3.7e-23
chr2-116	chr2	26569602	26569744	+	9.57	0.714	44	41	3.8	10.73	5.36e-28	9.24	1.37e-25
chr2-142	chr2	85555084	85555226	+	9.57	0.646	40	41	9.2	4.47	1.15e-14	11.54	3.56e-29
chr2-136	chr2	101226877	101227019	+	9.57	0.671	41	41	6.1	6.71	1.35e-20	6.84	6.6e-21
chr2-122	chr2	119956138	119956280	+	9.57	0.685	43	41	3.8	10.73	5.36e-28	13.33	1.51e-31
chr2-123	chr2	224725866	224726008	+	9.57	0.734	43	41	3.1	13.41	1.2e-31	11.49	4.15e-29
chr3-51	chr3	41316495	41316637	+	9.57	0.722	42	41	6.9	5.96	8.01e-19	15.97	1.51e-34
chr3-58	chr3	48595714	48595856	+	9.57	0.648	41	41	0.8	53.64	2.28e-55	6.04	5.11e-19
chr3-53	chr3	71493592	71493734	+	9.57	0.7	42	41	3.1	13.41	1.2e-31	10.47	1.34e-27
chr3-60	chr3	79068558	79068700	+	9.57	0.634	41	41	3.8	10.73	5.36e-28	10.31	2.32e-27
chr3-69	chr3	87360547	87360689	+	9.57	0.671	40	41	3.1	13.41	1.2e-31	11.3	1.65e-27
chr3-44	chr3	194048857	194048999	+	9.57	0.767	44	41	5.4	7.66	1.19e-22	10.66	6.7e-28
chr3-64	chr3	195512760	195512902	+	9.57	0.532	41	41	9.2	4.47	1.15e-14	4.46	2.54e-14
chr4-52	chr4	11499714	11499856	+	9.57	0.758	42	41	3.8	10.73	5.36e-28	17.02	1.27e-35
chr4-61	chr4	84473482	84473624	+	9.57	0.719	40	41	3.8	10.73	5.36e-28	9.24	1.37e-25
chr4-54	chr4	95428999	95429141	+	9.57	0.693	42	41	5.4	7.66	1.19e-22	12.03	7.42e-30
chr5-56	chr5	911854	911996	+	9.57	0.676	42	41	3.1	13.41	1.2e-31	6.37	8.28e-20
chr5-52	chr5	34929506	34929648	+	9.57	0.718	43	41	5.4	7.66	1.19e-22	11.39	2.62e-28
chr5-67	chr5	95179019	95179161	+	9.57	0.846	41	42	1.5	27.48	8.81e-45	10.28	2.65e-27
chr5-57	chr5	124084548	124084690	+	9.57	0.627	42	41	2.3	17.88	1.91e-36	9.21	1.54e-25
chr5-59	chr5	145582973	145583115	+	9.57	0.689	42	42	2.3	18.32	1.04e-37	10.95	2.47e-28
chr5-69	chr5	159688062	159688204	+	9.57	0.667	41	41	5.4	7.66	1.19e-22	9.81	1.47e-26
chr6-237	chr6	5435665	5435807	+	9.57	0.615	42	41	6.1	6.71	1.35e-20	8.8	7.87e-25
chr6-201	chr6	6467640	6467782	+	9.57	0.636	44	41	6.1	6.71	1.35e-20	8.51	2.68e-24
chr6-215	chr6	9127489	9127631	+	9.57	0.639	43	41	1.5	26.82	2.42e-43	8.62	1.73e-24
chr6-218	chr6	15945997	15946139	+	9.57	0.718	43	41	6.9	5.96	8.01e-19	5.59	1.75e-17
chr6-221	chr6	30737900	30738042	+	9.57	0.592	43	41	7.6	5.36	2.87e-17	4.71	2.11e-15
chr6-261	chr6	31082478	31082620	+	9.57	0.6	41	41	4.6	8.94	4.49e-25	5.28	4.79e-17
chr6-283	chr6	36526918	36527060	+	9.57	0.553	40	41	4.6	8.94	4.49e-25	4.86	7.81e-16
chr6-244	chr6	37001097	37001239	+	9.57	0.687	42	41	6.1	6.71	1.35e-20	4.51	8.34e-15
chr6-285	chr6	41792936	41793078	+	9.57	0.649	40	41	3.8	10.73	5.36e-28	5.52	1.09e-17
chr6-196	chr6	45623737	45623879	+	9.57	0.655	45	42	9.2	4.58	2.49e-15	5.96	7.92e-19
chr6-269	chr6	149556321	149556463	+	9.57	0.754	41	41	2.3	17.88	1.91e-36	13.79	4.2e-32
chr8-73	chr8	37403185	37403327	+	9.57	0.647	40	44	3.8	11.51	3.74e-31	10.84	7.15e-27
chr8-58	chr8	102107999	102108141	+	9.57	0.697	43	42	3.8	10.99	4.87e-29	4.56	1.3e-14
chr8-63	chr8	119030841	119030983	+	9.57	0.627	42	41	3.8	10.73	5.36e-28	6.22	1.79e-19
chr8-64	chr8	124532662	124532804	+	9.57	0.685	42	42	3.1	13.74	8.72e-33	6.68	1.53e-20
chr8-60	chr8	125212391	125212533	+	9.57	0.624	43	41	9.2	4.47	1.15e-14	5.73	3.03e-18
chr8-69	chr8	128889144	128889286	+	9.57	0.642	41	41	8.4	4.88	6.79e-16	6.93	4.3e-21
chr8-65	chr8	144363891	144364033	+	9.57	0.722	42	41	3.8	10.73	5.36e-28	9.21	1.54e-25
chr8-66	chr8	146228268	146228410	+	9.57	0.712	42	41	5.4	7.66	1.19e-22	6.39	7.08e-20
chr9-75	chr9	38227259	38227401	+	9.57	0.778	39	41	6.1	6.71	1.35e-20	11.13	1.38e-28
chr10-99	chr10	32229937	32230079	+	9.57	0.657	41	41	6.1	6.71	1.35e-20	13.72	5.05e-32
chr10-94	chr10	44184007	44184149	+	9.57	0.676	42	41	4.6	8.94	4.49e-25	8.56	2.15e-24
chr10-110	chr10	64576546	64576688	+	9.57	0.692	40	41	4.6	8.94	4.49e-25	10.52	4.74e-27
chr10-95	chr10	70091621	70091763	+	9.57	0.754	42	41	0.8	53.64	2.28e-55	9.52	4.57e-26
chr10-85	chr10	70821127	70821269	+	9.57	0.716	44	41	4.6	8.94	4.49e-25	9.65	2.77e-26
chr10-111	chr10	74075485	74075627	+	9.57	0.774	40	41	4.6	8.94	4.49e-25	8.12	1.47e-23
chr10-87	chr10	89870249	89870391	+	9.57	0.846	44	41	2.3	17.88	1.91e-36	11.98	8.71e-30
chr10-105	chr10	100092814	100092956	+	9.57	0.73	41	41	2.3	17.88	1.91e-36	12.9	5.17e-31
chr10-106	chr10	116180661	116180803	+	9.57	0.692	41	42	3.8	10.99	4.87e-29	13.27	1.8e-31
chr10-97	chr10	122268107	122268249	+	9.57	0.763	42	41	2.3	17.88	1.91e-36	12.4	2.37e-30
chr10-89	chr10	123900539	123900681	+	9.57	0.51	44	41	1.5	26.82	2.42e-43	7.05	2.33e-21
chr10-91	chr10	135072764	135072906	+	9.57	0.679	44	41	3.8	10.73	5.36e-28	7.25	8.71e-22
chr11-81	chr11	1060920	1061062	+	9.57	0.667	41	41	4.6	8.94	4.49e-25	12.71	4.76e-30
chr11-98	chr11	14913775	14913917	+	9.57	0.69	40	41	1.5	26.82	2.42e-43	15.58	2.42e-33
chr11-99	chr11	32140107	32140249	+	9.57	0.699	40	41	6.9	5.96	8.01e-19	9.54	1.64e-25
chr11-66	chr11	35571441	35571583	+	9.57	0.699	44	41	4.6	8.94	4.49e-25	10.2	3.47e-27
chr11-76	chr11	62366637	62366779	+	9.57	0.735	42	41	3.1	13.41	1.2e-31	8.78	3.18e-24
chr11-77	chr11	63953295	63953437	+	9.57	0.585	42	42	3.8	10.99	4.87e-29	7.72	9.04e-23
chr11-88	chr11	68119913	68120055	+	9.57	0.671	41	41	0.8	53.64	2.28e-55	6.31	1.13e-19
chr12-71	chr12	92205574	92205716	+	9.57	0.87	43	41	0.8	53.64	2.28e-55	13.21	2.15e-31
chr12-114	chr12	96199903	96200045	+	9.57	0.568	39	41	5.4	7.66	1.19e-22	8.86	6.26e-25
chr12-82	chr12	104165316	104165458	+	9.57	0.847	41	41	3.8	10.73	5.36e-28	11.87	1.2e-29
chr12-84	chr12	109831653	109831795	+	9.57	0.758	41	41	4.6	8.94	4.49e-25	14.13	1.64e-32
chr12-99	chr12	111183598	111183740	+	9.57	0.738	40	41	3.8	10.73	5.36e-28	7.36	5.02e-22
chr12-78	chr12	111864263	111864405	+	9.57	0.824	42	41	3.8	10.73	5.36e-28	7.79	6.73e-23
chr12-85	chr12	113536473	113536615	+	9.57	0.693	41	41	6.9	5.96	8.01e-19	7.77	2.41e-22
chr12-67	chr12	113737471	113737613	+	9.57	0.643	44	41	6.9	5.96	8.01e-19	7.08	1.95e-21
chr13-6	chr13	107028842	107028984	+	9.57	0.804	42	42	4.6	9.16	4.89e-26	11.3	7.59e-29
chr14-51	chr14	50566212	50566354	+	9.57	0.711	44	41	7.6	5.36	2.87e-17	7.68	1.1e-22
chr14-48	chr14	55073638	55073780	+	9.57	0.585	45	41	3.1	13.41	1.2e-31	6.93	4.3e-21
chr14-55	chr14	58922815	58922957	+	9.57	0.709	44	41	2.3	17.88	1.91e-36	10.17	3.97e-27
chr14-66	chr14	69241626	69241768	+	9.57	0.647	41	41	5.4	7.66	1.19e-22	7.74	2.66e-22
chr14-62	chr14	100150367	100150509	+	9.57	0.683	42	41	4.6	8.94	4.49e-25	8.03	2.23e-23
chr14-71	chr14	102729341	102729483	+	9.57	0.716	40	41	8.4	4.88	6.79e-16	11.4	5.62e-29
chr16-55	chr16	2896967	2897109	+	9.57	0.792	39	41	6.9	5.96	8.01e-19	16.82	2.02e-35
chr16-45	chr16	67217451	67217593	+	9.57	0.762	43	41	3.8	10.73	5.36e-28	8.95	1.6e-24
chr16-39	chr16	67951956	67952098	+	9.57	0.713	47	41	3.8	10.73	5.36e-28	9.52	4.57e-26
chr16-46	chr16	81400075	81400217	+	9.57	0.767	43	41	2.3	17.88	1.91e-36	15.53	4.42e-34
chr17-75	chr17	21305130	21305272	+	9.57	0.649	45	43	9.9	4.33	7.84e-15	5.37	2.71e-17
chr17-87	chr17	27055684	27055826	+	9.57	0.758	43	41	3.8	10.73	5.36e-28	6.59	2.5e-20
chr17-97	chr17	30049430	30049572	+	9.57	0.584	42	41	7.6	5.36	2.87e-17	7.21	1.04e-21
chr17-107	chr17	38257488	38257630	+	9.57	0.78	41	41	7.6	5.36	2.87e-17	5.19	8.9e-17
chr17-98	chr17	39835379	39835521	+	9.57	0.598	42	41	3.1	13.41	1.2e-31	7.64	4.33e-22
chr17-100	chr17	41534265	41534407	+	9.57	0.754	42	41	5.4	7.66	1.19e-22	15.53	4.42e-34
chr17-89	chr17	43302873	43303015	+	9.57	0.831	43	43	2.3	18.75	5.54e-39	6.89	5.1e-21
chr17-93	chr17	77702462	77702604	+	9.57	0.81	43	41	4.6	8.94	4.49e-25	11.63	2.62e-29
chr18-35	chr18	20695719	20695861	+	9.57	0.746	40	41	5.4	7.66	1.19e-22	11.82	1.4e-29
chr19-150	chr19	10975183	10975325	+	9.57	0.662	42	41	5.4	7.66	1.19e-22	6.71	3.84e-20
chr19-151	chr19	11254098	11254240	+	9.57	0.687	42	42	4.6	9.16	4.89e-26	5.95	8.51e-19
chr19-162	chr19	13049068	13049210	+	9.57	0.584	41	41	4.6	8.94	4.49e-25	5.59	7.34e-18
chr19-153	chr19	16260130	16260272	+	9.57	0.645	42	41	6.9	5.96	8.01e-19	6.71	1.29e-20
chr19-164	chr19	16296097	16296239	+	9.57	0.683	41	41	7.6	5.36	2.87e-17	5.7	3.73e-18
chr19-155	chr19	18263279	18263421	+	9.57	0.794	42	42	8.4	5	1.35e-16	5.59	7.34e-18
chr19-128	chr19	42462070	42462212	+	9.57	0.781	45	43	8.4	5.11	2.63e-17	6.7	1.41e-20
chr19-147	chr19	48018568	48018710	+	9.57	0.644	43	42	4.6	9.16	4.89e-26	8.31	6.36e-24
chr19-168	chr19	48232778	48232920	+	9.57	0.72	41	41	3.1	13.41	1.2e-31	7	3.03e-21
chr19-159	chr19	49946775	49946917	+	9.57	0.743	42	41	3.8	10.73	5.36e-28	9.03	3.13e-25
chr20-88	chr20	11795035	11795177	+	9.57	0.823	40	41	2.3	17.88	1.91e-36	18.97	1.93e-37
chr20-77	chr20	36618268	36618410	+	9.57	0.676	43	41	3.1	13.41	1.2e-31	5.14	1.21e-16
chr20-85	chr20	44509686	44509828	+	9.57	0.868	41	41	9.9	4.13	1.45e-13	9.3	1.07e-25
chr20-96	chr20	44572890	44573032	+	9.57	0.662	40	41	8.4	4.88	6.79e-16	5.74	2.83e-18
chr22-7	chr22	37838638	37838780	+	9.57	0.831	43	41	4.6	8.94	4.49e-25	15.11	1.25e-33
chr1-187	chr1	1617726	1617868	+	9.33	0.657	40	40	0.4	104.67	1.63e-65	10.5	2.2e-26
chr1-173	chr1	12664523	12664665	+	9.33	0.716	41	40	3.8	10.47	5.77e-27	12.09	2.95e-29
chr1-160	chr1	15851571	15851713	+	9.33	0.708	42	40	6.9	5.81	4.8e-18	9.4	1.09e-24
chr1-149	chr1	22345674	22345816	+	9.33	0.646	43	40	3.8	10.47	5.77e-27	8.84	2.53e-24
chr1-150	chr1	28201963	28202105	+	9.33	0.659	43	40	5.4	7.48	9.13e-22	7.14	4.44e-21
chr1-137	chr1	36840182	36840324	+	9.33	0.625	44	40	3.8	10.47	5.77e-27	7.45	3.32e-21
chr1-175	chr1	41900469	41900611	+	9.33	0.692	41	41	3.1	13.41	1.2e-31	6.6	6.83e-20
chr1-194	chr1	52520832	52520974	+	9.33	0.634	40	40	6.9	5.81	4.8e-18	9.22	5.54e-25
chr1-208	chr1	53576960	53577102	+	9.33	0.585	39	40	3.8	10.47	5.77e-27	6.09	1.04e-18
chr1-176	chr1	96699994	96700136	+	9.33	0.676	41	40	3.8	10.47	5.77e-27	12.25	1.81e-29
chr1-198	chr1	150227885	150228027	+	9.33	0.732	40	40	2.3	17.44	3.42e-35	7.7	3.24e-22
chr1-215	chr1	153936081	153936223	+	9.33	0.778	39	40	5.4	7.48	9.13e-22	9.57	1.44e-25
chr1-155	chr1	155107684	155107826	+	9.33	0.735	43	40	0.8	52.33	1.22e-53	7.22	3.09e-21
chr1-168	chr1	169863425	169863567	+	9.33	0.781	42	40	3.1	13.08	1.61e-30	9.31	3.86e-25
chr1-182	chr1	172608042	172608184	+	9.33	0.7	41	40	3.8	10.47	5.77e-27	9.31	3.86e-25
chr1-158	chr1	226864911	226865053	+	9.33	0.667	43	40	3.1	13.08	1.61e-30	9.71	8.73e-26
chr1-135	chr1	234743993	234744135	+	9.33	0.646	45	41	3.1	13.41	1.2e-31	8.89	2.01e-24
chr2-131	chr2	37593046	37593188	+	9.33	0.667	41	40	3.1	13.08	1.61e-30	6.55	8.72e-20
chr2-126	chr2	42359707	42359849	+	9.33	0.74	42	41	3.1	13.41	1.2e-31	7.31	1.96e-21
chr2-128	chr2	70589862	70590004	+	9.33	0.732	42	41	3.1	13.41	1.2e-31	10.14	1.84e-26
chr2-140	chr2	74153838	74153980	+	9.33	0.882	40	40	4.6	8.72	4.03e-24	10.17	1.61e-26
chr2-141	chr2	84743396	84743538	+	9.33	0.766	40	40	2.3	17.44	3.42e-35	18.14	7.8e-36
chr2-133	chr2	85814803	85814945	+	9.33	0.685	41	40	7.6	5.23	1.55e-16	7.7	3.24e-22
chr2-146	chr2	95944026	95944168	+	9.33	0.787	40	40	5.4	7.48	9.13e-22	9.6	5.17e-25
chr3-57	chr3	16143098	16143240	+	9.33	0.807	41	40	2.3	17.44	3.42e-35	12.88	2.85e-30
chr3-52	chr3	46531500	46531642	+	9.33	0.75	42	40	6.9	5.81	4.8e-18	10.69	2.71e-27
chr3-68	chr3	59374372	59374514	+	9.33	0.647	40	40	3.1	13.08	1.61e-30	10.98	9.95e-28
chr3-61	chr3	160116927	160117069	+	9.33	0.77	41	40	1.5	26.17	6.51e-42	23.37	5.04e-40
chr3-62	chr3	184037661	184037803	+	9.33	0.7	41	40	2.3	17.44	3.42e-35	6.47	1.3e-19
chr4-62	chr4	86708435	86708577	+	9.33	0.794	40	40	5.4	7.48	9.13e-22	10.37	8.21e-27
chr4-55	chr4	119771764	119771906	+	9.33	0.671	42	41	6.9	5.96	8.01e-19	17.45	3.37e-35
chr4-80	chr4	187751010	187751152	+	9.33	0.708	38	40	6.1	6.54	9.07e-20	11.68	1.05e-28
chr5-66	chr5	65505335	65505477	+	9.33	0.721	41	40	1.5	26.17	6.51e-42	10.33	9.4e-27
chr5-54	chr5	89517912	89518054	+	9.33	0.833	43	41	0.8	53.64	2.28e-55	12.25	1.81e-29
chr5-70	chr5	131699171	131699313	+	9.33	0.682	40	40	4.6	8.72	4.03e-24	10.46	2.53e-26
chr5-68	chr5	131723449	131723591	+	9.33	0.667	41	40	6.1	6.54	9.07e-20	8.3	2.29e-23
chr5-71	chr5	133184004	133184146	+	9.33	0.746	40	40	2.3	17.44	3.42e-35	14.07	6.03e-31
chr5-58	chr5	145234318	145234460	+	9.33	0.781	42	40	2.3	17.44	3.42e-35	11.63	1.22e-28
chr5-61	chr5	153666820	153666962	+	9.33	0.676	42	40	3.8	10.47	5.77e-27	10.25	1.23e-26
chr6-273	chr6	7770065	7770207	+	9.33	0.694	40	40	3.1	13.08	1.61e-30	9.74	3.12e-25
chr6-239	chr6	11277622	11277764	+	9.33	0.569	42	41	6.9	5.96	8.01e-19	7.15	1.32e-20
chr6-276	chr6	26402611	26402753	+	9.33	0.691	40	40	5.4	7.48	9.13e-22	8.95	1.6e-24
chr6-258	chr6	26533501	26533643	+	9.33	0.738	41	40	1.5	26.17	6.51e-42	6.27	3.9e-19
chr6-222	chr6	31720815	31720957	+	9.33	0.565	43	40	5.4	7.48	9.13e-22	5.73	7.72e-18
chr6-205	chr6	32081800	32081942	+	9.33	0.645	44	40	6.1	6.54	9.07e-20	4.8	2.59e-15
chr6-223	chr6	32577651	32577793	+	9.33	0.644	43	40	7.6	5.23	1.55e-16	13.44	3.2e-30
chr6-298	chr6	34131745	34131887	+	9.33	0.708	39	40	5.4	7.48	9.13e-22	8.38	1.66e-23
chr6-246	chr6	37157709	37157851	+	9.33	0.686	42	40	3.8	10.47	5.77e-27	5.58	1.87e-17
chr6-265	chr6	41040050	41040192	+	9.33	0.653	41	40	9.9	4.03	6.05e-13	4.89	1.4e-15
chr6-214	chr6	52217260	52217402	+	9.33	0.652	44	41	5.4	7.66	1.19e-22	7.09	5.8e-21
chr6-233	chr6	52281436	52281578	+	9.33	0.736	43	40	1.5	26.17	6.51e-42	5.99	4.76e-18
chr6-234	chr6	57566428	57566570	+	9.33	0.634	43	40	7.6	5.23	1.55e-16	7.83	1.79e-22
chr6-235	chr6	64514366	64514508	+	9.33	0.667	43	40	3.8	10.47	5.77e-27	9.22	5.54e-25
chr6-252	chr6	106258483	106258625	+	9.33	0.746	42	40	3.1	13.08	1.61e-30	15.76	1.58e-33
chr6-270	chr6	158489961	158490103	+	9.33	0.712	41	40	5.4	7.48	9.13e-22	9.25	4.91e-25
chr6-271	chr6	159423522	159423664	+	9.33	0.606	41	40	2.3	17.44	3.42e-35	10.94	1.15e-27
chr7-52	chr7	2197329	2197471	+	9.33	0.692	39	40	1.5	26.17	6.51e-42	13.19	1.19e-30
chr7-37	chr7	73989856	73989998	+	9.33	0.852	44	40	4.6	8.72	4.03e-24	14	1.32e-31
chr7-45	chr7	80329086	80329228	+	9.33	0.778	41	40	3.8	10.47	5.77e-27	22.06	4.58e-39
chr7-47	chr7	155082850	155082992	+	9.33	0.608	41	40	1.5	26.17	6.51e-42	9.13	7.92e-25
chr7-43	chr7	155128144	155128286	+	9.33	0.614	42	41	6.9	5.96	8.01e-19	5.5	2.97e-17
chr7-51	chr7	157204815	157204957	+	9.33	0.88	40	40	6.1	6.54	9.07e-20	11.94	4.76e-29
chr8-74	chr8	38517886	38518028	+	9.33	0.746	40	40	0.8	52.33	1.22e-53	14.29	6.15e-32
chr8-76	chr8	102374463	102374605	+	9.33	0.551	40	40	3.1	13.08	1.61e-30	4.69	5.28e-15
chr8-77	chr8	105766726	105766868	+	9.33	0.618	40	40	5.4	7.48	9.13e-22	8.28	2.55e-23
chr8-67	chr8	123701914	123702056	+	9.33	0.815	41	40	3.1	13.08	1.61e-30	7.47	3.02e-21
chr8-68	chr8	128864503	128864645	+	9.33	0.646	41	41	5.4	7.66	1.19e-22	7.72	2.94e-22
chr8-80	chr8	142045642	142045784	+	9.33	0.68	40	40	6.9	5.81	4.8e-18	5.51	2.78e-17
chr9-71	chr9	36407159	36407301	+	9.33	0.758	40	40	2.3	17.44	3.42e-35	12.2	2.13e-29
chr9-77	chr9	68455697	68455839	+	9.33	0.784	39	40	8.4	4.76	3.33e-15	18.26	6.07e-36
chr9-67	chr9	96215827	96215969	+	9.33	0.743	41	40	6.1	6.54	9.07e-20	13.07	1.69e-30
chr9-58	chr9	101833778	101833920	+	9.33	0.767	42	40	1.5	26.17	6.51e-42	7.86	1.62e-22
chr10-202	chr10	29925223	29925365	+	9.33	0.729	32	40	4.6	8.72	4.03e-24	10.06	2.4e-26
chr10-100	chr10	36964719	36964861	+	9.33	0.716	41	40	3.1	13.08	1.61e-30	9.78	6.77e-26
chr10-119	chr10	65472198	65472340	+	9.33	0.667	39	40	6.1	6.54	9.07e-20	9.33	1.39e-24
chr10-96	chr10	73620478	73620620	+	9.33	0.618	42	41	3.1	13.41	1.2e-31	7.03	7.55e-21
chr10-67	chr10	99303014	99303156	+	9.33	0.727	47	40	3.1	13.08	1.61e-30	9.16	7.03e-25
chr11-82	chr11	1148714	1148856	+	9.33	0.598	41	40	3.1	13.08	1.61e-30	4.29	8.31e-14
chr11-96	chr11	6271162	6271304	+	9.33	0.745	40	40	3.1	13.08	1.61e-30	11.39	2.62e-28
chr11-97	chr11	7709537	7709679	+	9.33	0.692	40	40	1.5	26.17	6.51e-42	9.38	3.03e-25
chr11-84	chr11	34288217	34288359	+	9.33	0.794	41	40	2.3	17.44	3.42e-35	10.37	8.21e-27
chr11-86	chr11	57192477	57192619	+	9.33	0.639	41	40	0.4	104.67	1.63e-65	6.44	1.53e-19
chr11-101	chr11	58341027	58341169	+	9.33	0.683	40	40	4.6	8.72	4.03e-24	10.17	1.61e-26
chr11-103	chr11	64691603	64691745	+	9.33	0.778	40	40	5.4	7.48	9.13e-22	8.98	1.42e-24
chr11-104	chr11	66036893	66037035	+	9.33	0.75	40	40	6.9	5.81	4.8e-18	9.61	1.27e-25
chr11-89	chr11	69065044	69065186	+	9.33	0.797	41	40	5.4	7.48	9.13e-22	5.37	6.47e-17
chr11-91	chr11	76236106	76236248	+	9.33	0.714	41	40	6.9	5.81	4.8e-18	18.88	1.7e-36
chr11-71	chr11	107433638	107433780	+	9.33	0.794	44	41	3.8	10.73	5.36e-28	9.38	3.03e-25
chr11-79	chr11	124981462	124981604	+	9.33	0.804	42	41	3.1	13.41	1.2e-31	12.76	4.02e-30
chr11-80	chr11	125980188	125980330	+	9.33	0.644	42	40	2.3	17.44	3.42e-35	8.11	5.3e-23
chr12-75	chr12	53902461	53902603	+	9.33	0.807	42	40	3.8	10.47	5.77e-27	14.9	1.27e-32
chr12-92	chr12	91749270	91749412	+	9.33	0.634	40	40	8.4	4.76	3.33e-15	13.52	4.83e-31
chr12-93	chr12	92539569	92539711	+	9.33	0.759	40	40	4.6	8.72	4.03e-24	11.25	4.11e-28
chr12-83	chr12	104246416	104246558	+	9.33	0.663	41	41	7.6	5.36	2.87e-17	4.35	5.63e-14
chr12-97	chr12	105804078	105804220	+	9.33	0.689	40	40	7.6	5.23	1.55e-16	5.88	8.48e-18
chr12-89	chr12	123002564	123002706	+	9.33	0.889	41	40	4.6	8.72	4.03e-24	11.49	1.94e-28
chr13-10	chr13	21402764	21402906	+	9.33	0.83	40	40	2.3	17.44	3.42e-35	30.64	1.47e-44
chr13-11	chr13	96187598	96187740	+	9.33	0.75	40	40	4.6	8.72	4.03e-24	10.03	1.11e-25
chr14-57	chr14	35761428	35761570	+	9.33	0.855	43	40	3.8	10.47	5.77e-27	9.35	3.42e-25
chr14-69	chr14	46213193	46213335	+	9.33	0.845	40	40	3.1	13.08	1.61e-30	11.8	1.67e-27
chr14-59	chr14	56247134	56247276	+	9.33	0.767	43	40	4.6	8.72	4.03e-24	7.16	4.06e-21
chr14-68	chr14	75086525	75086667	+	9.33	0.769	41	40	3.8	10.47	5.77e-27	5.45	4.12e-17
chr17-114	chr17	6452108	6452250	+	9.33	0.655	40	40	5.4	7.48	9.13e-22	6.2	5.71e-19
chr17-116	chr17	21185610	21185752	+	9.33	0.793	40	40	3.1	13.08	1.61e-30	7.64	1.41e-21
chr17-91	chr17	48133203	48133345	+	9.33	0.797	43	40	1.5	26.17	6.51e-42	6.24	4.55e-19
chr17-82	chr17	56595316	56595458	+	9.33	0.674	44	40	5.4	7.48	9.13e-22	8.02	8e-23
chr18-37	chr18	60093035	60093177	+	9.33	0.762	39	40	4.6	8.72	4.03e-24	15.67	1.96e-33
chr19-171	chr19	7197188	7197330	+	9.33	0.603	40	40	4.6	8.72	4.03e-24	8.48	1.08e-23
chr19-161	chr19	8591215	8591357	+	9.33	0.766	41	40	5.4	7.48	9.13e-22	4.36	5.36e-14
chr19-163	chr19	16179608	16179750	+	9.33	0.616	41	41	6.1	6.71	1.35e-20	4.7	5.01e-15
chr19-144	chr19	16190051	16190193	+	9.33	0.68	43	41	6.9	5.96	8.01e-19	5.2	1.88e-16
chr19-178	chr19	27869256	27869398	+	9.33	0.629	40	40	6.1	6.54	9.07e-20	4.53	1.6e-14
chr19-146	chr19	37663498	37663640	+	9.33	0.646	43	40	2.3	17.44	3.42e-35	13.38	6.94e-31
chr19-182	chr19	49184405	49184547	+	9.33	0.608	40	40	5.4	7.48	9.13e-22	8.16	4.31e-23
chr20-72	chr20	10742454	10742596	+	9.33	0.633	43	40	3.8	10.47	5.77e-27	7.39	1.35e-21
chr20-73	chr20	13765523	13765665	+	9.33	0.807	43	40	4.6	8.72	4.03e-24	11.16	5.54e-28
chr20-89	chr20	33264430	33264572	+	9.33	0.8	40	40	0.8	52.33	1.22e-53	7.53	7e-22
chr20-110	chr20	36166552	36166694	+	9.33	0.742	38	40	2.3	17.44	3.42e-35	6.38	2.1e-19
chr20-78	chr20	39945383	39945525	+	9.33	0.778	43	40	3.1	13.08	1.61e-30	7.97	9.81e-23
chr20-92	chr20	42571414	42571556	+	9.33	0.761	40	40	6.1	6.54	9.07e-20	4.15	2.46e-13
chr20-93	chr20	42579059	42579201	+	9.33	0.59	40	40	5.4	7.48	9.13e-22	5.31	2.26e-16
chr20-94	chr20	43987816	43987958	+	9.33	0.703	40	40	3.8	10.47	5.77e-27	8.09	5.88e-23
chr20-95	chr20	44539543	44539685	+	9.33	0.662	40	40	5.4	7.48	9.13e-22	6.97	2.81e-19
chr21-41	chr21	39046473	39046615	+	9.33	0.763	41	40	5.4	7.48	9.13e-22	10.94	1.15e-27
chr1-161	chr1	21651117	21651259	+	9.1	0.586	42	39	1.5	25.51	1.7e-40	6.79	7.49e-20
chr1-188	chr1	21660776	21660918	+	9.1	0.719	40	40	3.8	10.47	5.77e-27	9.11	3.21e-24
chr1-222	chr1	27625999	27626141	+	9.1	0.768	38	39	1.5	25.51	1.7e-40	6.88	4.9e-20
chr1-189	chr1	28764545	28764687	+	9.1	0.7	40	39	5.4	7.29	6.85e-21	12.13	6.41e-28
chr1-207	chr1	43815192	43815334	+	9.1	0.684	39	39	4.6	8.5	3.53e-23	7.84	5.83e-22
chr1-192	chr1	45095163	45095305	+	9.1	0.712	40	39	5.4	7.29	6.85e-21	10.34	3.81e-26
chr1-152	chr1	45965868	45966010	+	9.1	0.767	43	39	1.5	25.51	1.7e-40	9.47	8.5e-25
chr1-195	chr1	65292800	65292942	+	9.1	0.71	40	39	3.1	12.76	2.11e-29	9.21	2.24e-24
chr1-196	chr1	68150747	68150889	+	9.1	0.676	40	39	2.3	17.01	5.97e-34	9.17	2.53e-24
chr1-164	chr1	92270267	92270409	+	9.1	0.605	42	39	6.1	6.38	5.96e-19	7	2.67e-20
chr1-166	chr1	148531869	148532011	+	9.1	0.701	42	39	6.9	5.67	2.8e-17	13.93	8.8e-31
chr1-199	chr1	168377577	168377719	+	9.1	0.746	40	39	4.6	8.5	3.53e-23	9.08	3.61e-24
chr1-230	chr1	182050251	182050393	+	9.1	0.808	38	39	2.3	17.01	5.97e-34	9.14	2.85e-24
chr1-183	chr1	201886661	201886803	+	9.1	0.605	41	40	3.1	13.08	1.61e-30	7.21	1e-20
chr1-172	chr1	249123135	249123277	+	9.1	0.676	42	39	2.3	17.01	5.97e-34	7.68	1.23e-20
chr2-127	chr2	48133946	48134088	+	9.1	0.681	42	39	3.1	12.76	2.11e-29	12.39	6.06e-29
chr2-154	chr2	73439648	73439790	+	9.1	0.738	39	39	6.1	6.38	5.96e-19	8.32	7.42e-23
chr2-165	chr2	75145020	75145162	+	9.1	0.62	38	39	3.8	10.21	6.05e-26	5.15	6.07e-16
chr2-143	chr2	86161350	86161492	+	9.1	0.783	40	40	1.5	26.17	6.51e-42	11.2	2.23e-27
chr2-148	chr2	173557891	173558033	+	9.1	0.676	40	39	0.8	51.03	6.4e-52	12.56	3.68e-29
chr2-149	chr2	201936316	201936458	+	9.1	0.657	40	39	3.1	12.76	2.11e-29	15.81	8.64e-33
chr3-71	chr3	11238223	11238365	+	9.1	0.571	39	39	4.6	8.5	3.53e-23	7.13	1.44e-20
chr3-59	chr3	50306258	50306400	+	9.1	0.685	41	39	6.1	6.38	5.96e-19	7.31	6.37e-21
chr3-66	chr3	51533995	51534137	+	9.1	0.733	40	39	3.1	12.76	2.11e-29	8.81	1.02e-23
chr3-67	chr3	58512485	58512627	+	9.1	0.783	40	39	4.6	8.5	3.53e-23	8.93	6.46e-24
chr3-70	chr3	124829478	124829620	+	9.1	0.648	40	39	3.1	12.76	2.11e-29	8.88	2.93e-23
chr3-43	chr3	183828167	183828309	+	9.1	0.74	44	39	2.3	17.01	5.97e-34	14.38	2.8e-31
chr3-56	chr3	186929758	186929900	+	9.1	0.585	42	39	4.6	8.5	3.53e-23	9.59	2.1e-24
chr3-75	chr3	195511664	195511806	+	9.1	0.684	39	39	6.9	5.67	2.8e-17	4.5	4.18e-14
chr4-59	chr4	17029194	17029336	+	9.1	0.818	40	39	4.6	8.5	3.53e-23	11.59	6.65e-28
chr4-57	chr4	177927155	177927297	+	9.1	0.719	41	39	4.6	8.5	3.53e-23	12.9	7.27e-29
chr4-58	chr4	190643110	190643252	+	9.1	0.762	41	39	8.4	4.64	1.6e-14	7.98	3.19e-22
chr5-74	chr5	34487482	34487624	+	9.1	0.729	39	39	4.6	8.5	3.53e-23	9.57	5.86e-25
chr5-84	chr5	34924143	34924285	+	9.1	0.792	38	39	3.8	10.21	6.05e-26	15.91	6.96e-33
chr5-87	chr5	83583880	83584022	+	9.1	0.786	38	39	4.6	8.5	3.53e-23	15.36	2.49e-32
chr5-60	chr5	149852578	149852720	+	9.1	0.817	42	39	1.5	25.51	1.7e-40	7.77	7.84e-22
chr5-102	chr5	150618907	150619049	+	9.1	0.737	37	39	1.5	25.51	1.7e-40	11.06	3.47e-27
chr5-62	chr5	169261644	169261786	+	9.1	0.697	42	39	5.4	7.29	6.85e-21	9.96	1.44e-25
chr6-253	chr6	4313686	4313828	+	9.1	0.707	41	40	4.6	8.72	4.03e-24	8.87	8.13e-24
chr6-315	chr6	4942536	4942678	+	9.1	0.657	38	39	5.4	7.29	6.85e-21	8.06	7.61e-22
chr6-255	chr6	6712921	6713063	+	9.1	0.759	41	40	4.6	8.72	4.03e-24	7.17	1.2e-20
chr6-272	chr6	7051116	7051258	+	9.1	0.64	40	39	6.1	6.38	5.96e-19	8.03	8.44e-22
chr6-274	chr6	9532955	9533097	+	9.1	0.792	40	39	8.4	4.64	1.6e-14	11.54	3.62e-27
chr6-257	chr6	14002065	14002207	+	9.1	0.671	41	39	3.8	10.21	6.05e-26	7.41	4.01e-21
chr6-278	chr6	28047857	28047999	+	9.1	0.635	40	39	7.6	5.1	8.14e-16	6.84	5.81e-20
chr6-227	chr6	35888848	35888990	+	9.1	0.681	43	39	7.6	5.1	8.14e-16	5.37	1.65e-16
chr6-248	chr6	41769217	41769359	+	9.1	0.615	42	40	9.2	4.36	5.16e-14	6.03	3.83e-18
chr6-308	chr6	42219775	42219917	+	9.1	0.657	39	39	9.2	4.25	2.27e-13	4.53	3.23e-14
chr6-309	chr6	42981900	42982042	+	9.1	0.621	39	39	6.9	5.67	2.8e-17	4	1.4e-12
chr6-288	chr6	43667386	43667528	+	9.1	0.708	40	40	3.8	10.47	5.77e-27	6.34	7.25e-19
chr6-333	chr6	44095102	44095244	+	9.1	0.788	38	39	7.6	5.1	8.14e-16	5.62	3.64e-17
chr6-267	chr6	52020922	52021064	+	9.1	0.576	41	39	4.6	8.5	3.53e-23	5.99	1.21e-17
chr7-54	chr7	6486675	6486817	+	9.1	0.9	39	40	2.3	17.44	3.42e-35	9.17	2.53e-24
chr7-58	chr7	116271009	116271151	+	9.1	0.719	39	39	3.1	12.76	2.11e-29	19.77	2.32e-36
chr8-78	chr8	118342485	118342627	+	9.1	0.742	40	39	5.4	7.29	6.85e-21	7.51	2.5e-21
chr8-86	chr8	127559735	127559877	+	9.1	0.625	39	39	3.1	12.76	2.11e-29	7.81	6.43e-22
chr8-72	chr8	144301882	144302024	+	9.1	0.632	41	39	5.4	7.29	6.85e-21	4.05	9.82e-13
chr9-65	chr9	72037223	72037365	+	9.1	0.843	41	39	6.9	5.67	2.8e-17	15.02	5.69e-32
chr9-72	chr9	130829622	130829764	+	9.1	0.625	40	39	6.9	5.67	2.8e-17	10.07	9.73e-26
chr9-78	chr9	132754261	132754403	+	9.1	0.694	39	40	3.8	10.47	5.77e-27	8.32	7.42e-23
chr9-54	chr9	139605071	139605213	+	9.1	0.77	44	39	3.1	12.76	2.11e-29	10.63	1.45e-26
chr10-107	chr10	3797339	3797481	+	9.1	0.742	40	39	3.8	10.21	6.05e-26	7.45	3.32e-21
chr10-98	chr10	17271381	17271523	+	9.1	0.571	41	39	6.1	6.38	5.96e-19	7.09	1.72e-20
chr10-103	chr10	64492828	64492970	+	9.1	0.705	41	39	4.6	8.5	3.53e-23	11.34	1.42e-27
chr11-94	chr11	2934535	2934677	+	9.1	0.766	40	39	6.1	6.38	5.96e-19	11.74	4.18e-28
chr11-83	chr11	16691413	16691555	+	9.1	0.85	41	39	4.6	8.5	3.53e-23	15.54	1.64e-32
chr11-111	chr11	20057360	20057502	+	9.1	0.627	39	40	4.6	8.72	4.03e-24	6.72	3.11e-19
chr11-112	chr11	35051543	35051685	+	9.1	0.661	39	39	3.1	12.76	2.11e-29	9.96	1.44e-25
chr11-74	chr11	36171315	36171457	+	9.1	0.708	42	40	6.9	5.81	4.8e-18	10.34	3.81e-26
chr11-87	chr11	63639639	63639781	+	9.1	0.667	41	39	3.8	10.21	6.05e-26	10.42	2.9e-26
chr11-115	chr11	64071839	64071981	+	9.1	0.737	39	39	3.8	10.21	6.05e-26	8.4	5.38e-23
chr11-105	chr11	71791673	71791815	+	9.1	0.704	40	39	3.8	10.21	6.05e-26	8.45	4.33e-23
chr11-117	chr11	76092201	76092343	+	9.1	0.823	39	39	6.1	6.38	5.96e-19	11.69	4.88e-28
chr11-106	chr11	88443010	88443152	+	9.1	0.629	40	39	6.1	6.38	5.96e-19	14.07	6.03e-31
chr12-116	chr12	6641891	6642033	+	9.1	0.698	38	39	2.3	17.01	5.97e-34	8.8	5.37e-22
chr12-104	chr12	31635945	31636087	+	9.1	0.714	39	39	1.5	25.51	1.7e-40	19.93	1.05e-34
chr12-106	chr12	50056944	50057086	+	9.1	0.75	39	39	3.1	12.76	2.11e-29	15.36	2.49e-32
chr12-108	chr12	76371921	76372063	+	9.1	0.794	39	39	3.8	10.21	6.05e-26	5.67	7.06e-17
chr12-126	chr12	89630868	89631010	+	9.1	0.642	37	39	5.4	7.29	6.85e-21	5.65	8.09e-17
chr12-111	chr12	90484760	90484902	+	9.1	0.632	39	39	2.3	17.01	5.97e-34	16.49	1.85e-33
chr12-115	chr12	100309014	100309156	+	9.1	0.689	39	39	4.6	8.5	3.53e-23	11.39	1.22e-27
chr12-98	chr12	110436801	110436943	+	9.1	0.58	40	40	8.4	4.76	3.33e-15	6.72	3.11e-19
chr12-86	chr12	122015167	122015309	+	9.1	0.73	41	39	7.6	5.1	8.14e-16	6.72	1.05e-19
chr12-87	chr12	122665317	122665459	+	9.1	0.685	41	40	6.1	6.54	9.07e-20	6.67	1.34e-19
chr13-9	chr13	80563519	80563661	+	9.1	0.736	41	39	1.5	25.51	1.7e-40	15.27	3.07e-32
chr14-65	chr14	61992250	61992392	+	9.1	0.541	41	39	1.5	25.51	1.7e-40	7.79	7.11e-22
chr14-80	chr14	71757862	71758004	+	9.1	0.62	39	39	2.3	17.01	5.97e-34	10.82	3.33e-26
chr14-67	chr14	72900382	72900524	+	9.1	0.689	41	39	4.6	8.5	3.53e-23	8.56	1.01e-22
chr14-83	chr14	79511631	79511773	+	9.1	0.738	39	39	4.6	8.5	3.53e-23	17.46	2.29e-34
chr16-59	chr16	15596272	15596414	+	9.1	0.789	38	39	5.4	7.29	6.85e-21	12.62	3.11e-29
chr16-53	chr16	57228614	57228756	+	9.1	0.818	40	39	5.4	7.29	6.85e-21	15.19	3.78e-32
chr17-105	chr17	6966929	6967071	+	9.1	0.714	41	40	9.9	4.03	6.05e-13	6.37	6.2e-19
chr17-115	chr17	8113935	8114077	+	9.1	0.641	40	39	4.6	8.5	3.53e-23	8.05	2.34e-22
chr17-123	chr17	20170502	20170644	+	9.1	0.768	39	39	4.6	8.5	3.53e-23	11.84	3.05e-28
chr17-142	chr17	28443701	28443843	+	9.1	0.705	38	39	4.6	8.5	3.53e-23	16.49	1.85e-33
chr17-108	chr17	41142067	41142209	+	9.1	0.657	41	39	2.3	17.01	5.97e-34	9.6	5.17e-25
chr17-110	chr17	45899043	45899185	+	9.1	0.699	41	39	3.1	12.76	2.11e-29	7.32	5.81e-21
chr17-118	chr17	46095787	46095929	+	9.1	0.683	40	39	3.8	10.21	6.05e-26	8.53	3.12e-23
chr17-119	chr17	46564139	46564281	+	9.1	0.694	40	39	7.6	5.1	8.14e-16	6.09	7.24e-18
chr17-120	chr17	47472444	47472586	+	9.1	0.833	40	40	6.1	6.54	9.07e-20	12.68	2.62e-29
chr17-111	chr17	61594431	61594573	+	9.1	0.667	41	39	6.1	6.38	5.96e-19	6.98	2.92e-20
chr17-129	chr17	70358181	70358323	+	9.1	0.674	39	39	3.8	10.21	6.05e-26	4.94	5.01e-15
chr17-130	chr17	71265249	71265391	+	9.1	0.663	39	39	3.8	10.21	6.05e-26	7.84	5.83e-22
chr17-133	chr17	74443176	74443318	+	9.1	0.643	39	39	7.6	5.1	8.14e-16	8.1	1.91e-22
chr18-33	chr18	20046728	20046870	+	9.1	0.689	41	39	5.4	7.29	6.85e-21	8.12	1.72e-22
chr18-36	chr18	59854221	59854363	+	9.1	0.857	39	39	3.8	10.21	6.05e-26	20.37	7.66e-37
chr19-170	chr19	4575467	4575609	+	9.1	0.782	40	39	6.1	6.38	5.96e-19	11.84	3.05e-28
chr19-172	chr19	9517667	9517809	+	9.1	0.687	40	39	4.6	8.5	3.53e-23	11.2	2.23e-27
chr19-173	chr19	10679757	10679899	+	9.1	0.738	40	40	3.8	10.47	5.77e-27	7.32	5.81e-21
chr19-175	chr19	15529857	15529999	+	9.1	0.712	40	40	4.6	8.72	4.03e-24	5.94	1.62e-17
chr19-212	chr19	17664140	17664282	+	9.1	0.627	37	39	7.6	5.1	8.14e-16	5.61	3.89e-17
chr19-154	chr19	17876165	17876307	+	9.1	0.681	42	39	4.6	8.5	3.53e-23	5.95	5.92e-18
chr19-166	chr19	37861803	37861945	+	9.1	0.726	41	39	3.1	12.76	2.11e-29	10.11	8.53e-26
chr19-158	chr19	39616291	39616433	+	9.1	0.742	42	39	7.6	5.1	8.14e-16	8.37	5.99e-23
chr19-188	chr19	49322814	49322956	+	9.1	0.683	39	39	2.3	17.01	5.97e-34	8.84	9.12e-24
chr19-190	chr19	58962780	58962922	+	9.1	0.768	39	39	8.4	4.64	1.6e-14	6.86	5.34e-20
chr20-104	chr20	39946436	39946578	+	9.1	0.705	39	39	3.1	12.76	2.11e-29	6.74	9.64e-20
chr20-82	chr20	39958334	39958476	+	9.1	0.671	42	39	5.4	7.29	6.85e-21	7.64	1.41e-21
chr20-79	chr20	43223484	43223626	+	9.1	0.716	43	39	4.6	8.5	3.53e-23	7.13	1.44e-20
chr1-201	chr1	11863583	11863725	+	8.87	0.691	39	38	4.6	8.29	3.01e-22	5.2	1.07e-15
chr1-203	chr1	20928077	20928219	+	8.87	0.767	39	38	3.1	12.43	2.7e-28	8.59	9.03e-23
chr1-220	chr1	23016050	23016192	+	8.87	0.723	38	38	4.6	8.29	3.01e-22	10.15	3.03e-25
chr1-221	chr1	25051107	25051249	+	8.87	0.745	38	38	3.8	9.94	6.19e-25	6.95	3.06e-19
chr1-191	chr1	42317401	42317543	+	8.87	0.718	40	38	6.9	5.52	1.6e-16	7.28	2.27e-20
chr1-193	chr1	45140218	45140360	+	8.87	0.778	40	38	4.6	8.29	3.01e-22	5.5	1.8e-16
chr1-209	chr1	54519079	54519221	+	8.87	0.726	39	38	3.1	12.43	2.7e-28	9.74	1.27e-24
chr1-210	chr1	65329943	65330085	+	8.87	0.733	39	38	2.3	16.57	1.02e-32	10.91	2.5e-26
chr1-197	chr1	145066880	145067022	+	8.87	0.643	40	38	7.6	4.97	4.18e-15	4.19	6.94e-13
chr1-254	chr1	155232016	155232158	+	8.87	0.625	37	38	6.1	6.21	3.82e-18	8.16	5.03e-22
chr1-179	chr1	159851844	159851986	+	8.87	0.658	41	38	6.9	5.52	1.6e-16	7.53	7.4e-21
chr1-216	chr1	165840708	165840850	+	8.87	0.714	39	38	6.1	6.21	3.82e-18	11.29	7.72e-27
chr1-229	chr1	178506080	178506222	+	8.87	0.616	38	38	2.3	16.57	1.02e-32	6.63	4.71e-19
chr1-218	chr1	203576515	203576657	+	8.87	0.701	39	38	5.4	7.1	5.01e-20	10.74	4.43e-26
chr1-184	chr1	204485557	204485699	+	8.87	0.552	41	38	5.4	7.1	5.01e-20	7.16	3.9e-20
chr1-231	chr1	206677547	206677689	+	8.87	0.657	38	38	5.4	7.1	5.01e-20	7.68	3.77e-21
chr1-200	chr1	212204419	212204561	+	8.87	0.78	40	38	3.1	12.43	2.7e-28	9.09	1.3e-23
chr1-233	chr1	224356897	224357039	+	8.87	0.625	38	38	2.3	16.57	1.02e-32	10.23	2.32e-25
chr1-298	chr1	233576651	233576793	+	8.87	0.865	36	38	4.6	8.29	3.01e-22	13.93	4.86e-30
chr1-185	chr1	244517198	244517340	+	8.87	0.593	41	38	9.2	4.14	9.71e-13	9.49	3.05e-24
chr2-138	chr2	28668917	28669059	+	8.87	0.688	40	38	6.1	6.21	3.82e-18	10.11	3.46e-25
chr2-150	chr2	38892958	38893100	+	8.87	0.73	39	38	5.4	7.1	5.01e-20	9.88	7.6e-25
chr2-139	chr2	47261260	47261402	+	8.87	0.644	40	38	2.3	16.57	1.02e-32	6.58	6.01e-19
chr2-153	chr2	70141693	70141835	+	8.87	0.71	39	38	8.4	4.52	7.45e-14	8.88	2.93e-23
chr2-164	chr2	70531201	70531343	+	8.87	0.727	38	38	3.8	9.94	6.19e-25	11.69	2.28e-27
chr2-130	chr2	228683017	228683159	+	8.87	0.671	42	38	7.6	4.97	4.18e-15	10.39	1.35e-25
chr3-79	chr3	46120373	46120515	+	8.87	0.657	38	38	1.5	24.86	4.35e-39	10	5.14e-25
chr3-80	chr3	48514495	48514637	+	8.87	0.75	38	38	1.5	24.86	4.35e-39	8.19	4.53e-22
chr3-72	chr3	65388322	65388464	+	8.87	0.656	39	38	4.6	8.29	3.01e-22	10.82	3.33e-26
chr3-82	chr3	66023020	66023162	+	8.87	0.7	38	39	3.1	12.76	2.11e-29	8.42	1.74e-22
chr3-93	chr3	98240982	98241124	+	8.87	0.767	37	38	2.3	16.57	1.02e-32	11.75	1.95e-27
chr3-47	chr3	100120237	100120379	+	8.87	0.761	43	38	6.1	6.21	3.82e-18	13.64	1.02e-29
chr3-73	chr3	183024797	183024939	+	8.87	0.762	39	38	3.1	12.43	2.7e-28	8.32	2.67e-22
chr3-74	chr3	183602637	183602779	+	8.87	0.716	39	38	2.3	16.57	1.02e-32	11.85	1.42e-27
chr3-63	chr3	187465907	187466049	+	8.87	0.803	41	38	2.3	16.57	1.02e-32	8.53	1.13e-22
chr3-87	chr3	188400732	188400874	+	8.87	0.636	38	38	2.3	16.57	1.02e-32	11.69	2.28e-27
chr3-100	chr3	197157041	197157183	+	8.87	0.745	37	38	1.5	24.86	4.35e-39	6.6	5.54e-19
chr4-75	chr4	7024049	7024191	+	8.87	0.61	38	38	5.4	7.1	5.01e-20	8.73	5.17e-23
chr4-56	chr4	47351346	47351488	+	8.87	0.536	41	38	2.3	16.57	1.02e-32	13.36	2.12e-29
chr4-77	chr4	69226995	69227137	+	8.87	0.778	38	38	0.8	49.72	3.27e-50	9.85	8.64e-25
chr4-63	chr4	99367843	99367985	+	8.87	0.648	40	39	5.4	7.29	6.85e-21	9.22	8.07e-24
chr4-79	chr4	147442062	147442204	+	8.87	0.672	38	38	1.5	24.86	4.35e-39	10.9	1.17e-25
chr4-71	chr4	153700967	153701109	+	8.87	0.677	39	39	1.5	25.51	1.7e-40	15.14	2.55e-31
chr4-72	chr4	154354516	154354658	+	8.87	0.627	39	38	3.1	12.43	2.7e-28	9.09	1.3e-23
chr4-94	chr4	190571389	190571531	+	8.87	0.739	37	38	3.1	12.43	2.7e-28	5.35	2.54e-15
chr5-83	chr5	34915616	34915758	+	8.87	0.782	38	38	8.4	4.52	7.45e-14	15.32	1.69e-31
chr5-75	chr5	35130324	35130466	+	8.87	0.725	39	38	8.4	4.52	7.45e-14	10.6	6.76e-26
chr5-79	chr5	57185415	57185557	+	8.87	0.723	39	38	3.1	12.43	2.7e-28	8.56	1.01e-22
chr5-88	chr5	95159596	95159738	+	8.87	0.615	38	38	3.8	9.94	6.19e-25	6.04	2.48e-17
chr5-90	chr5	114797412	114797554	+	8.87	0.758	38	38	6.1	6.21	3.82e-18	9.49	3.05e-24
chr5-72	chr5	133702813	133702955	+	8.87	0.719	40	39	3.8	10.21	6.05e-26	9.88	7.6e-25
chr6-254	chr6	6333776	6333918	+	8.87	0.68	41	38	5.4	7.1	5.01e-20	9.77	1.12e-24
chr6-256	chr6	7758788	7758930	+	8.87	0.605	41	38	3.1	12.43	2.7e-28	8.56	1.01e-22
chr6-216	chr6	9766517	9766659	+	8.87	0.621	43	38	6.9	5.52	1.6e-16	8.01	9.35e-22
chr6-317	chr6	10747653	10747795	+	8.87	0.667	38	38	5.4	7.1	5.01e-20	7.73	3.1e-21
chr6-343	chr6	11236586	11236728	+	8.87	0.608	37	38	3.8	9.94	6.19e-25	4.97	4.21e-15
chr6-318	chr6	11575741	11575883	+	8.87	0.785	38	38	6.1	6.21	3.82e-18	9.77	1.12e-24
chr6-350	chr6	25963042	25963184	+	8.87	0.75	37	38	6.1	6.21	3.82e-18	6.07	2.14e-17
chr6-259	chr6	30071395	30071537	+	8.87	0.676	41	38	5.4	7.1	5.01e-20	6.08	7.8e-18
chr6-260	chr6	30650402	30650544	+	8.87	0.64	41	38	6.1	6.21	3.82e-18	4.14	9.61e-13
chr6-296	chr6	32156874	32157016	+	8.87	0.619	39	38	3.1	12.43	2.7e-28	4.52	7.63e-14
chr6-324	chr6	33218145	33218287	+	8.87	0.754	38	38	3.8	9.94	6.19e-25	5.26	7.37e-16
chr6-303	chr6	36514565	36514707	+	8.87	0.649	39	38	6.9	5.52	1.6e-16	4.27	4.13e-13
chr6-306	chr6	37956462	37956604	+	8.87	0.83	39	38	7.6	4.97	4.18e-15	5.36	4.18e-16
chr6-247	chr6	38238282	38238424	+	8.87	0.658	42	39	7.6	5.1	8.14e-16	7.1	5.1e-20
chr6-331	chr6	43214625	43214767	+	8.87	0.647	38	38	5.4	7.1	5.01e-20	5.41	3.04e-16
chr6-440	chr6	44215285	44215427	+	8.87	0.764	35	38	6.1	6.21	3.82e-18	4.99	3.75e-15
chr6-311	chr6	44280688	44280830	+	8.87	0.662	39	38	6.9	5.52	1.6e-16	7.2	3.26e-20
chr6-313	chr6	158452514	158452656	+	8.87	0.721	39	38	5.4	7.1	5.01e-20	10.52	8.93e-26
chr7-53	chr7	6483357	6483499	+	8.87	0.746	39	38	2.3	16.57	1.02e-32	8.73	5.17e-23
chr7-48	chr7	32576302	32576444	+	8.87	0.758	40	39	0.8	51.03	6.4e-52	21.65	6.69e-37
chr7-62	chr7	84001598	84001740	+	8.87	0.641	38	38	0.8	49.72	3.27e-50	12.13	6.41e-28
chr7-69	chr7	102516400	102516542	+	8.87	0.703	36	38	4.6	8.29	3.01e-22	11.96	1.04e-27
chr8-75	chr8	98102828	98102970	+	8.87	0.676	40	39	3.8	10.21	6.05e-26	14.24	2.27e-30
chr8-83	chr8	117560607	117560749	+	8.87	0.63	39	38	3.1	12.43	2.7e-28	6.93	1.12e-19
chr8-85	chr8	124253579	124253721	+	8.87	0.689	39	38	3.8	9.94	6.19e-25	10.07	3.95e-25
chr8-70	chr8	142164352	142164494	+	8.87	0.63	41	38	3.8	9.94	6.19e-25	5.81	3.3e-17
chr9-60	chr9	5455416	5455558	+	8.87	0.754	41	38	1.5	24.86	4.35e-39	27.87	6.67e-41
chr9-80	chr9	26296974	26297116	+	8.87	0.71	38	38	3.1	12.43	2.7e-28	11.39	5.72e-27
chr9-81	chr9	34254600	34254742	+	8.87	0.75	38	38	1.5	24.86	4.35e-39	9.14	4.15e-23
chr9-83	chr9	107756021	107756163	+	8.87	0.763	38	38	5.4	7.1	5.01e-20	9.16	1.02e-23
chr9-70	chr9	117453408	117453550	+	8.87	0.724	41	38	6.9	5.52	1.6e-16	11.29	7.72e-27
chr9-73	chr9	138818777	138818919	+	8.87	0.754	40	39	4.6	8.5	3.53e-23	14.31	1.87e-30
chr9-79	chr9	139475695	139475837	+	8.87	0.568	39	39	1.5	25.51	1.7e-40	4.25	9.19e-13
chr9-74	chr9	140412666	140412808	+	8.87	0.653	40	38	5.4	7.1	5.01e-20	5.49	1.93e-16
chr10-134	chr10	6763565	6763707	+	8.87	0.705	37	38	5.4	7.1	5.01e-20	9.56	2.38e-24
chr10-115	chr10	32735001	32735143	+	8.87	0.758	39	38	4.6	8.29	3.01e-22	18.19	3.6e-34
chr10-109	chr10	49514511	49514653	+	8.87	0.807	40	39	7.6	5.1	8.14e-16	14.24	2.27e-30
chr10-128	chr10	99629269	99629411	+	8.87	0.712	38	38	7.6	4.97	4.18e-15	10.6	6.76e-26
chr10-104	chr10	100069375	100069517	+	8.87	0.662	41	38	3.8	9.94	6.19e-25	7.8	2.31e-21
chr10-120	chr10	112083437	112083579	+	8.87	0.676	39	38	5.4	7.1	5.01e-20	7	7.93e-20
chr10-129	chr10	114476846	114476988	+	8.87	0.739	38	38	5.4	7.1	5.01e-20	13.1	4.31e-29
chr10-131	chr10	125754331	125754473	+	8.87	0.721	38	38	5.4	7.1	5.01e-20	8.37	2.16e-22
chr11-95	chr11	2954711	2954853	+	8.87	0.741	40	39	2.3	17.01	5.97e-34	9.88	7.6e-25
chr11-120	chr11	29355866	29356008	+	8.87	0.684	38	38	4.6	8.29	3.01e-22	14.8	5.74e-31
chr11-116	chr11	68147867	68148009	+	8.87	0.714	39	38	9.2	4.14	9.71e-13	8.64	7.24e-23
chr11-141	chr11	92186289	92186431	+	8.87	0.816	37	38	3.1	12.43	2.7e-28	21.3	1.21e-36
chr11-129	chr11	102601809	102601951	+	8.87	0.625	38	38	5.4	7.1	5.01e-20	10.45	4.77e-25
chr11-107	chr11	103496156	103496298	+	8.87	0.769	40	38	2.3	16.57	1.02e-32	11.29	7.72e-27
chr11-142	chr11	105337400	105337542	+	8.87	0.647	37	38	1.5	24.86	4.35e-39	19.26	4.59e-35
chr11-108	chr11	128212910	128213052	+	8.87	0.652	40	38	6.1	6.21	3.82e-18	8.24	3.67e-22
chr11-169	chr11	128826466	128826608	+	8.87	0.824	35	38	3.1	12.43	2.7e-28	12.9	7.27e-29
chr12-107	chr12	54718791	54718933	+	8.87	0.807	39	39	3.8	10.21	6.05e-26	12.97	6.12e-29
chr12-110	chr12	89554648	89554790	+	8.87	0.699	39	38	5.4	7.1	5.01e-20	6.59	1.65e-18
chr12-77	chr12	101625405	101625547	+	8.87	0.731	42	38	3.1	12.43	2.7e-28	9.32	5.63e-24
chr12-100	chr12	111930962	111931104	+	8.87	0.873	40	38	3.1	12.43	2.7e-28	11.64	2.66e-27
chr12-102	chr12	122277523	122277665	+	8.87	0.658	40	38	5.4	7.1	5.01e-20	6.89	1.33e-19
chr13-7	chr13	20207707	20207849	+	8.87	0.778	41	38	4.6	8.29	3.01e-22	16.47	1.26e-32
chr13-12	chr13	31191970	31192112	+	8.87	0.712	38	38	3.1	12.43	2.7e-28	13.15	1.99e-28
chr13-8	chr13	45992613	45992755	+	8.87	0.667	41	38	1.5	24.86	4.35e-39	13.79	7.07e-30
chr14-74	chr14	50490474	50490616	+	8.87	0.648	39	38	3.8	9.94	6.19e-25	6.55	7.07e-19
chr14-76	chr14	59721277	59721419	+	8.87	0.58	39	38	5.4	7.1	5.01e-20	6.84	5.12e-19
chr14-79	chr14	69506061	69506203	+	8.87	0.78	39	38	6.1	6.21	3.82e-18	9.49	3.05e-24
chr14-91	chr14	80064786	80064928	+	8.87	0.646	38	38	4.6	8.29	3.01e-22	8.21	4.08e-22
chr15-15	chr15	60812298	60812440	+	8.87	0.703	37	38	4.6	8.29	3.01e-22	12.24	4.63e-28
chr15-16	chr15	70006701	70006843	+	8.87	0.639	37	38	5.4	7.1	5.01e-20	9.88	7.6e-25
chr16-58	chr16	8613853	8613995	+	8.87	0.634	38	38	1.5	24.86	4.35e-39	6.28	2.71e-18
chr17-112	chr17	964259	964401	+	8.87	0.667	40	39	2.3	17.01	5.97e-34	5.42	2.85e-16
chr17-136	chr17	4609499	4609641	+	8.87	0.566	38	38	3.8	9.94	6.19e-25	7.55	6.73e-21
chr17-139	chr17	18759534	18759676	+	8.87	0.852	38	38	3.8	9.94	6.19e-25	14.97	3.84e-31
chr17-106	chr17	36184649	36184791	+	8.87	0.682	41	38	4.6	8.29	3.01e-22	10.69	5.11e-26
chr17-117	chr17	37320899	37321041	+	8.87	0.662	40	38	6.1	6.21	3.82e-18	9.29	6.35e-24
chr17-148	chr17	43303600	43303742	+	8.87	0.746	38	38	6.9	5.52	1.6e-16	5.9	5.12e-17
chr17-127	chr17	48277894	48278036	+	8.87	0.648	39	38	1.5	24.86	4.35e-39	5.16	1.36e-15
chr17-151	chr17	54776820	54776962	+	8.87	0.721	38	38	3.8	9.94	6.19e-25	9.34	2.02e-23
chr17-153	chr17	65991262	65991404	+	8.87	0.733	38	38	3.8	9.94	6.19e-25	9.85	8.64e-25
chr17-121	chr17	67866313	67866455	+	8.87	0.731	40	38	6.9	5.52	1.6e-16	8.37	2.16e-22
chr17-175	chr17	72772388	72772530	+	8.87	0.762	36	38	8.4	4.52	7.45e-14	9.77	1.12e-24
chr17-131	chr17	73110243	73110385	+	8.87	0.727	39	38	0.8	49.72	3.27e-50	8.13	5.58e-22
chr17-132	chr17	74242745	74242887	+	8.87	0.784	39	39	0.8	51.03	6.4e-52	10.87	2.89e-26
chr17-134	chr17	75251745	75251887	+	8.87	0.614	39	38	7.6	4.97	4.18e-15	6.36	1.84e-18
chr18-40	chr18	30594094	30594236	+	8.87	0.783	37	38	5.4	7.1	5.01e-20	18.52	1e-32
chr19-183	chr19	6373461	6373603	+	8.87	0.7	39	38	7.6	4.97	4.18e-15	7.12	4.67e-20
chr19-192	chr19	7069625	7069767	+	8.87	0.705	38	39	6.9	5.67	2.8e-17	8.21	4.08e-22
chr19-184	chr19	7757367	7757509	+	8.87	0.649	39	38	3.8	9.94	6.19e-25	4.25	4.76e-13
chr19-174	chr19	11050222	11050364	+	8.87	0.568	40	38	3.8	9.94	6.19e-25	5.69	6.16e-17
chr19-196	chr19	13283261	13283403	+	8.87	0.608	38	39	6.1	6.38	5.96e-19	4.12	1.15e-12
chr19-185	chr19	16358574	16358716	+	8.87	0.703	39	38	4.6	8.29	3.01e-22	8.76	4.62e-23
chr19-176	chr19	16546864	16547006	+	8.87	0.618	40	39	4.6	8.5	3.53e-23	6.02	1.05e-17
chr19-187	chr19	30097070	30097212	+	8.87	0.726	39	38	4.6	8.29	3.01e-22	10.23	2.32e-25
chr19-200	chr19	38826336	38826478	+	8.87	0.737	38	38	1.5	24.86	4.35e-39	9.09	1.3e-23
chr19-180	chr19	39202524	39202666	+	8.87	0.787	40	38	4.6	8.29	3.01e-22	9	1.85e-23
chr19-181	chr19	46144594	46144736	+	8.87	0.635	40	38	3.8	9.94	6.19e-25	5.8	3.54e-17
chr20-134	chr20	6058136	6058278	+	8.87	0.816	35	38	5.4	7.1	5.01e-20	8.26	3.31e-22
chr20-106	chr20	44002623	44002765	+	8.87	0.737	39	38	7.6	4.97	4.18e-15	6.89	1.33e-19
chr20-86	chr20	48950551	48950693	+	8.87	0.778	41	38	2.3	16.57	1.02e-32	6.4	1.45e-18
chr20-97	chr20	49971115	49971257	+	8.87	0.667	40	38	3.8	9.94	6.19e-25	4.47	2.21e-13
chr20-108	chr20	52543216	52543358	+	8.87	0.63	39	38	4.6	8.29	3.01e-22	7.73	3.1e-21
chr21-52	chr21	34807129	34807271	+	8.87	0.639	38	38	2.3	16.57	1.02e-32	10.65	5.88e-26
chr21-45	chr21	44299653	44299795	+	8.87	0.742	40	38	9.2	4.14	9.71e-13	12.07	7.53e-28
chrX-37	chrX	13129019	13129161	+	8.87	0.7	39	38	2.3	16.57	1.02e-32	17.7	9.64e-34
chr1-186	chr1	1014988	1015130	+	8.63	0.628	40	37	3.8	9.68	6.17e-24	12.5	1.11e-27
chr1-237	chr1	9970569	9970711	+	8.63	0.701	37	37	3.8	9.68	6.17e-24	6.59	1.65e-18
chr1-202	chr1	19831546	19831688	+	8.63	0.712	39	37	0.4	96.82	1.73e-59	6.09	1.98e-17
chr1-241	chr1	28655415	28655557	+	8.63	0.843	37	37	7.6	4.84	2.09e-14	10.13	5.71e-24
chr1-223	chr1	36765676	36765818	+	8.63	0.746	38	37	6.9	5.38	8.88e-16	10.54	3.62e-25
chr1-190	chr1	36808491	36808633	+	8.63	0.696	40	37	3.8	9.68	6.17e-24	8.67	2.33e-22
chr1-206	chr1	42328750	42328892	+	8.63	0.71	39	37	3.8	9.68	6.17e-24	6.97	8.34e-19
chr1-244	chr1	44287843	44287985	+	8.63	0.641	37	37	1.5	24.2	1.08e-37	10.33	7.19e-25
chr1-226	chr1	101093033	101093175	+	8.63	0.759	38	37	2.3	16.14	1.69e-31	6.36	5.03e-18
chr1-227	chr1	112135496	112135638	+	8.63	0.632	38	37	3.8	9.68	6.17e-24	10.72	2.07e-25
chr1-228	chr1	117369927	117370069	+	8.63	0.73	38	37	0.8	48.41	1.62e-48	7.68	1.23e-20
chr1-214	chr1	150505160	150505302	+	8.63	0.745	39	37	6.1	6.05	2.38e-17	9.77	4.54e-24
chr1-286	chr1	155931875	155932017	+	8.63	0.618	36	37	3.1	12.1	3.37e-27	6.82	5.58e-19
chr1-180	chr1	161195442	161195584	+	8.63	0.69	41	38	3.8	9.94	6.19e-25	8.79	1.49e-22
chr1-259	chr1	208357746	208357888	+	8.63	0.828	37	37	6.1	6.05	2.38e-17	7.37	4.65e-20
chr1-330	chr1	227947118	227947260	+	8.63	0.754	35	37	1.5	24.2	1.08e-37	9.69	2.38e-23
chr1-219	chr1	236047036	236047178	+	8.63	0.676	39	38	7.6	4.97	4.18e-15	7.14	1.27e-19
chr2-137	chr2	27233687	27233829	+	8.63	0.882	40	37	3.8	9.68	6.17e-24	10.93	4.72e-25
chr2-162	chr2	27940047	27940189	+	8.63	0.679	38	37	1.5	24.2	1.08e-37	9.41	1.58e-23
chr2-172	chr2	28837132	28837274	+	8.63	0.763	37	37	6.9	5.38	8.88e-16	6.89	3.97e-19
chr2-174	chr2	37330913	37331055	+	8.63	0.746	37	37	6.9	5.38	8.88e-16	13.57	6.79e-29
chr2-163	chr2	42360173	42360315	+	8.63	0.706	38	37	6.1	6.05	2.38e-17	6.69	1e-18
chr2-187	chr2	46166084	46166226	+	8.63	0.746	36	37	5.4	6.92	3.57e-19	7.41	3.86e-20
chr2-152	chr2	65357212	65357354	+	8.63	0.706	39	38	3.1	12.43	2.7e-28	8.5	4.53e-22
chr2-135	chr2	99797539	99797681	+	8.63	0.815	41	37	6.9	5.38	8.88e-16	13.15	1.99e-28
chr2-147	chr2	100907502	100907644	+	8.63	0.616	40	37	3.8	9.68	6.17e-24	6.1	1.84e-17
chr2-158	chr2	100997750	100997892	+	8.63	0.646	39	37	2.3	16.14	1.69e-31	8.53	4.06e-22
chr2-170	chr2	174314034	174314176	+	8.63	0.768	38	37	1.5	24.2	1.08e-37	17.12	2.16e-32
chr2-160	chr2	204676330	204676472	+	8.63	0.676	39	38	4.6	8.29	3.01e-22	11.14	5.63e-26
chr3-88	chr3	42003907	42004049	+	8.63	0.672	37	37	6.1	6.05	2.38e-17	10.12	1.41e-24
chr3-78	chr3	45241284	45241426	+	8.63	0.772	38	37	6.1	6.05	2.38e-17	8.42	6.28e-22
chr3-90	chr3	45650500	45650642	+	8.63	0.727	37	37	1.5	24.2	1.08e-37	8.95	8.39e-23
chr3-95	chr3	124598052	124598194	+	8.63	0.603	37	37	3.1	12.1	3.37e-27	11.49	1.97e-26
chr3-96	chr3	183088684	183088826	+	8.63	0.764	37	37	7.6	4.84	2.09e-14	8.11	7.25e-21
chr3-97	chr3	184529869	184530011	+	8.63	0.646	37	38	6.1	6.21	3.82e-18	8.42	6.28e-22
chr3-98	chr3	190284312	190284454	+	8.63	0.648	37	37	3.1	12.1	3.37e-27	10.33	7.19e-25
chr3-77	chr3	196014462	196014604	+	8.63	0.658	39	37	8.4	4.4	3.39e-13	8.62	2.92e-22
chr4-82	chr4	2221834	2221976	+	8.63	0.688	37	37	5.4	6.92	3.57e-19	11.49	1.97e-26
chr4-76	chr4	11670942	11671084	+	8.63	0.708	38	37	1.5	24.2	1.08e-37	9.59	8.53e-24
chr4-66	chr4	20424199	20424341	+	8.63	0.767	39	37	3.1	12.1	3.37e-27	14.83	3.17e-30
chr4-67	chr4	25314294	25314436	+	8.63	0.627	39	37	3.1	12.1	3.37e-27	13.86	3.24e-29
chr4-95	chr4	35936100	35936242	+	8.63	0.896	36	37	2.3	16.14	1.69e-31	13.86	3.24e-29
chr4-86	chr4	81375336	81375478	+	8.63	0.732	37	37	2.3	16.14	1.69e-31	10.5	4.16e-25
chr4-69	chr4	99841281	99841423	+	8.63	0.786	39	37	3.8	9.68	6.17e-24	13.79	3.91e-29
chr4-88	chr4	111553147	111553289	+	8.63	0.796	37	37	2.3	16.14	1.69e-31	14.83	3.17e-30
chr4-78	chr4	112880404	112880546	+	8.63	0.762	38	38	3.1	12.43	2.7e-28	9.34	2.02e-23
chr4-89	chr4	128791973	128792115	+	8.63	0.671	37	37	5.4	6.92	3.57e-19	11.59	1.45e-26
chr4-73	chr4	169557745	169557887	+	8.63	0.738	39	37	3.8	9.68	6.17e-24	7.82	6.8e-21
chr4-91	chr4	170175933	170176075	+	8.63	0.712	37	37	3.1	12.1	3.37e-27	9.97	9.67e-24
chr4-92	chr4	177909506	177909648	+	8.63	0.667	37	37	2.3	16.14	1.69e-31	15	2.11e-30
chr5-94	chr5	37668770	37668912	+	8.63	0.793	37	37	4.6	8.07	2.5e-21	14.66	4.72e-30
chr5-148	chr5	37787113	37787255	+	8.63	0.719	33	37	5.4	6.92	3.57e-19	9.72	1.41e-21
chr5-80	chr5	68201045	68201187	+	8.63	0.694	39	37	1.5	24.2	1.08e-37	12.95	3.37e-28
chr5-81	chr5	95720161	95720303	+	8.63	0.746	39	37	5.4	6.92	3.57e-19	12.03	4.13e-27
chr5-99	chr5	133706703	133706845	+	8.63	0.727	37	37	3.8	9.68	6.17e-24	10.08	1.61e-24
chr5-82	chr5	171612862	171613004	+	8.63	0.652	39	37	5.4	6.92	3.57e-19	6.78	6.61e-19
chr6-290	chr6	2104628	2104770	+	8.63	0.722	39	37	6.9	5.38	8.88e-16	12.56	9.41e-28
chr6-342	chr6	9523784	9523926	+	8.63	0.706	37	37	3.1	12.1	3.37e-27	9.27	2.58e-23
chr6-344	chr6	11441977	11442119	+	8.63	0.702	37	37	3.8	9.68	6.17e-24	8.25	1.19e-21
chr6-319	chr6	13303123	13303265	+	8.63	0.583	38	37	6.1	6.05	2.38e-17	5.82	7.84e-17
chr6-293	chr6	14067132	14067274	+	8.63	0.754	39	39	6.9	5.67	2.8e-17	7.71	3.62e-20
chr6-416	chr6	15027060	15027202	+	8.63	0.687	35	37	6.9	5.38	8.88e-16	7.64	1.49e-20
chr6-346	chr6	22108606	22108748	+	8.63	0.754	37	37	4.6	8.07	2.5e-21	9.38	1.79e-23
chr6-320	chr6	22881321	22881463	+	8.63	0.694	38	38	7.6	4.97	4.18e-15	11.81	7.79e-27
chr6-347	chr6	24127187	24127329	+	8.63	0.754	37	37	0.8	48.41	1.62e-48	11.04	7.56e-26
chr6-349	chr6	25476390	25476532	+	8.63	0.646	37	37	7.6	4.84	2.09e-14	6.84	5.12e-19
chr6-277	chr6	27861045	27861187	+	8.63	0.638	40	37	3.8	9.68	6.17e-24	4.87	1.78e-14
chr6-280	chr6	30975607	30975749	+	8.63	0.68	40	38	0.8	49.72	3.27e-50	6.86	4.71e-19
chr6-322	chr6	31704255	31704397	+	8.63	0.764	38	37	5.4	6.92	3.57e-19	4.17	1.62e-12
chr6-353	chr6	31940951	31941093	+	8.63	0.697	37	37	0.4	96.82	1.73e-59	4.47	2.1e-13
chr6-354	chr6	32054538	32054680	+	8.63	0.568	37	37	4.6	8.07	2.5e-21	4.4	3.47e-13
chr6-329	chr6	41846753	41846895	+	8.63	0.714	38	37	6.9	5.38	8.88e-16	6.54	2.1e-18
chr6-336	chr6	56558051	56558193	+	8.63	0.71	38	39	6.9	5.67	2.8e-17	8.14	6.53e-21
chr6-312	chr6	137384241	137384383	+	8.63	0.71	39	38	1.5	24.86	4.35e-39	17.35	1.35e-32
chr7-63	chr7	19444657	19444799	+	8.63	0.69	37	37	3.1	12.1	3.37e-27	16.67	5.44e-32
chr7-56	chr7	72992879	72993021	+	8.63	0.638	39	37	1.5	24.2	1.08e-37	13.15	1.99e-28
chr7-46	chr7	154997458	154997600	+	8.63	0.608	41	37	3.1	12.1	3.37e-27	7.87	5.57e-21
chr7-90	chr7	158622289	158622431	+	8.63	0.846	34	37	7.6	4.84	2.09e-14	7.35	5.1e-20
chr8-87	chr8	19029374	19029516	+	8.63	0.724	38	37	5.4	6.92	3.57e-19	11.09	6.53e-26
chr8-93	chr8	118631634	118631776	+	8.63	0.69	37	37	4.6	8.07	2.5e-21	6.63	3.82e-18
chr8-96	chr8	125212109	125212251	+	8.63	0.587	37	38	3.1	12.43	2.7e-28	5.02	1.59e-14
chr8-101	chr8	131206952	131207094	+	8.63	0.676	37	37	3.8	9.68	6.17e-24	6.76	2.14e-18
chr8-102	chr8	132855346	132855488	+	8.63	0.808	37	37	3.1	12.1	3.37e-27	11.14	5.63e-26
chr8-104	chr8	142167225	142167367	+	8.63	0.706	37	37	5.4	6.92	3.57e-19	5.22	2.25e-15
chr9-93	chr9	79481867	79482009	+	8.63	0.765	36	37	6.1	6.05	2.38e-17	16.11	1.13e-30
chr9-87	chr9	80650464	80650606	+	8.63	0.719	37	37	6.9	5.38	8.88e-16	9.58	3.47e-23
chr9-95	chr9	97555195	97555337	+	8.63	0.672	36	37	5.4	6.92	3.57e-19	10.04	1.83e-24
chr9-88	chr9	101504720	101504862	+	8.63	0.837	37	37	3.8	9.68	6.17e-24	14.09	1.84e-29
chr9-89	chr9	116385341	116385483	+	8.63	0.778	37	37	0.8	48.41	1.62e-48	7.87	5.57e-21
chr9-85	chr9	133811975	133812117	+	8.63	0.681	38	37	3.8	9.68	6.17e-24	6.27	8.01e-18
chr10-133	chr10	5626978	5627120	+	8.63	0.691	37	37	3.8	9.68	6.17e-24	9.38	1.79e-23
chr10-108	chr10	25782107	25782249	+	8.63	0.641	40	38	3.8	9.94	6.19e-25	11.04	7.56e-26
chr10-135	chr10	33798503	33798645	+	8.63	0.766	37	37	5.4	6.92	3.57e-19	11.92	5.68e-27
chr10-92	chr10	86184640	86184782	+	8.63	0.685	43	37	1.5	24.2	1.08e-37	13.15	1.99e-28
chr10-137	chr10	91982212	91982354	+	8.63	0.714	37	37	5.4	6.92	3.57e-19	9.41	1.58e-23
chr10-127	chr10	99161114	99161256	+	8.63	0.652	38	37	4.6	8.07	2.5e-21	7.54	2.32e-19
chr10-139	chr10	103832863	103833005	+	8.63	0.708	37	37	5.4	6.92	3.57e-19	8.47	5.05e-22
chr10-113	chr10	123822881	123823023	+	8.63	0.738	40	38	6.1	6.21	3.82e-18	9.66	2.7e-23
chr11-121	chr11	30344496	30344638	+	8.63	0.796	38	38	3.8	9.94	6.19e-25	15.74	3.97e-31
chr11-133	chr11	46148806	46148948	+	8.63	0.821	37	37	3.8	9.68	6.17e-24	6.57	1.78e-18
chr11-135	chr11	58102342	58102484	+	8.63	0.683	37	37	5.4	6.92	3.57e-19	14.68	2.6e-29
chr11-136	chr11	61739332	61739474	+	8.63	0.694	37	38	2.3	16.57	1.02e-32	7.92	4.56e-21
chr11-122	chr11	62521265	62521407	+	8.63	0.729	38	37	2.3	16.14	1.69e-31	7.39	4.24e-20
chr11-102	chr11	62521652	62521794	+	8.63	0.68	40	37	3.1	12.1	3.37e-27	7.59	1.81e-20
chr11-150	chr11	62572940	62573082	+	8.63	0.778	36	37	3.8	9.68	6.17e-24	9.01	6.65e-23
chr11-151	chr11	63606107	63606249	+	8.63	0.742	36	37	6.1	6.05	2.38e-17	4.65	6.66e-14
chr11-123	chr11	64085014	64085156	+	8.63	0.843	38	37	3.8	9.68	6.17e-24	8	3.36e-21
chr11-125	chr11	66405903	66406045	+	8.63	0.808	38	37	8.4	4.4	3.39e-13	8.25	1.19e-21
chr11-152	chr11	73046674	73046816	+	8.63	0.737	36	37	3.8	9.68	6.17e-24	9.92	2.71e-24
chr11-138	chr11	73881895	73882037	+	8.63	0.729	37	37	3.8	9.68	6.17e-24	9.97	9.67e-24
chr11-139	chr11	74030353	74030495	+	8.63	0.683	37	37	6.1	6.05	2.38e-17	12.53	5.18e-27
chr11-143	chr11	124940713	124940855	+	8.63	0.582	37	37	3.1	12.1	3.37e-27	7.31	6.13e-20
chr11-109	chr11	129731825	129731967	+	8.63	0.828	40	37	3.8	9.68	6.17e-24	10.76	1.79e-25
chr12-120	chr12	51182385	51182527	+	8.63	0.705	38	38	1.5	24.86	4.35e-39	9.48	1.24e-23
chr12-121	chr12	76679998	76680140	+	8.63	0.587	38	37	3.8	9.68	6.17e-24	7.75	2.98e-20
chr12-109	chr12	89413473	89413615	+	8.63	0.675	39	37	2.3	16.14	1.69e-31	10.28	8.23e-25
chr12-112	chr12	95598332	95598474	+	8.63	0.636	39	37	6.9	5.38	8.88e-16	6.87	4.32e-19
chr12-113	chr12	95611497	95611639	+	8.63	0.671	39	37	5.4	6.92	3.57e-19	7.31	6.13e-20
chr12-96	chr12	102455853	102455995	+	8.63	0.682	40	37	7.6	4.84	2.09e-14	8.28	1.07e-21
chr12-140	chr12	109915032	109915174	+	8.63	0.732	36	37	8.4	4.4	3.39e-13	8.79	1.49e-22
chr12-132	chr12	123624927	123625069	+	8.63	0.695	37	37	6.9	5.38	8.88e-16	5.41	7.24e-16
chr13-13	chr13	45496605	45496747	+	8.63	0.736	37	37	2.3	16.14	1.69e-31	6.68	1.09e-18
chr14-85	chr14	50988299	50988441	+	8.63	0.758	38	37	3.1	12.1	3.37e-27	7.27	7.11e-19
chr14-86	chr14	51296757	51296899	+	8.63	0.763	38	38	6.1	6.21	3.82e-18	7.12	1.39e-19
chr14-87	chr14	55360044	55360186	+	8.63	0.766	38	38	5.4	7.1	5.01e-20	8.12	2.01e-21
chr14-70	chr14	58711544	58711686	+	8.63	0.653	40	39	1.5	25.51	1.7e-40	8.89	1.06e-22
chr14-81	chr14	73970491	73970633	+	8.63	0.761	39	38	7.6	4.97	4.18e-15	7.78	8.29e-21
chr15-12	chr15	29962190	29962332	+	8.63	0.86	38	37	6.1	6.05	2.38e-17	17.12	2.16e-32
chr15-10	chr15	35262019	35262161	+	8.63	0.642	40	37	2.3	16.14	1.69e-31	13.86	3.24e-29
chr15-11	chr15	72519165	72519307	+	8.63	0.585	39	38	3.1	12.43	2.7e-28	5.86	6.34e-17
chr15-18	chr15	85951210	85951352	+	8.63	0.712	36	37	0.8	48.41	1.62e-48	15.18	1.4e-30
chr16-67	chr16	57411976	57412118	+	8.63	0.742	37	37	3.8	9.68	6.17e-24	10.99	8.74e-26
chr16-64	chr16	88281116	88281258	+	8.63	0.603	38	38	3.1	12.43	2.7e-28	5.3	1.37e-15
chr17-83	chr17	824412	824554	+	8.63	0.747	43	38	4.6	8.29	3.01e-22	8.53	1.47e-21
chr17-135	chr17	1014270	1014412	+	8.63	0.672	38	37	5.4	6.92	3.57e-19	6.34	5.44e-18
chr17-96	chr17	4843341	4843483	+	8.63	0.731	42	37	3.8	9.68	6.17e-24	7.78	8.29e-21
chr17-113	chr17	4870584	4870726	+	8.63	0.61	40	39	6.1	6.38	5.96e-19	7.06	1.81e-19
chr17-137	chr17	6917881	6918023	+	8.63	0.738	38	37	5.4	6.92	3.57e-19	7.32	1.82e-19
chr17-122	chr17	8059644	8059786	+	8.63	0.667	39	37	6.1	6.05	2.38e-17	5.35	1.06e-15
chr17-141	chr17	26925987	26926129	+	8.63	0.772	38	37	3.1	12.1	3.37e-27	9.19	1.33e-22
chr17-169	chr17	27253142	27253284	+	8.63	0.738	36	38	6.9	5.52	1.6e-16	8.06	8.91e-21
chr17-124	chr17	36068987	36069129	+	8.63	0.64	39	37	6.1	6.05	2.38e-17	9.7	5.85e-24
chr17-144	chr17	38574289	38574431	+	8.63	0.682	38	37	3.8	9.68	6.17e-24	10.2	1.08e-24
chr17-158	chr17	41778680	41778822	+	8.63	0.767	37	37	3.8	9.68	6.17e-24	6.36	5.03e-18
chr17-126	chr17	48255906	48256048	+	8.63	0.737	39	37	7.6	4.84	2.09e-14	6.73	8.5e-19
chr17-163	chr17	53025766	53025908	+	8.63	0.634	37	37	4.6	8.07	2.5e-21	9.66	6.64e-24
chr17-152	chr17	58583874	58584016	+	8.63	0.767	38	38	3.1	12.43	2.7e-28	9.62	7.53e-24
chr17-174	chr17	70147760	70147902	+	8.63	0.71	36	37	5.4	6.92	3.57e-19	12.79	2.63e-27
chr19-191	chr19	3565236	3565378	+	8.63	0.733	38	37	0.8	48.41	1.62e-48	11.92	5.68e-27
chr19-206	chr19	10400251	10400393	+	8.63	0.684	37	37	1.5	24.2	1.08e-37	6.89	3.97e-19
chr19-195	chr19	11546295	11546437	+	8.63	0.734	38	37	7.6	4.84	2.09e-14	6.91	3.64e-19
chr19-210	chr19	13245399	13245541	+	8.63	0.734	37	37	7.6	4.84	2.09e-14	4.86	1.88e-14
chr19-213	chr19	17788021	17788163	+	8.63	0.734	37	37	7.6	4.84	2.09e-14	5.19	2.55e-15
chr19-177	chr19	18434071	18434213	+	8.63	0.605	40	37	6.1	6.05	2.38e-17	5.72	1.37e-16
chr19-199	chr19	38085629	38085771	+	8.63	0.672	38	37	6.9	5.38	8.88e-16	15.27	1.14e-30
chr19-201	chr19	40315181	40315323	+	8.63	0.818	38	37	3.8	9.68	6.17e-24	8.23	1.32e-21
chr19-202	chr19	49004971	49005113	+	8.63	0.75	38	37	4.6	8.07	2.5e-21	7.9	5.04e-21
chr19-218	chr19	49468380	49468522	+	8.63	0.767	37	38	3.8	9.94	6.19e-25	6.15	1.47e-17
chr19-203	chr19	53438797	53438939	+	8.63	0.759	38	37	1.5	24.2	1.08e-37	11.49	1.97e-26
chr19-189	chr19	57049706	57049848	+	8.63	0.726	39	37	4.6	8.07	2.5e-21	11.59	1.45e-26
chr20-102	chr20	36008804	36008946	+	8.63	0.724	39	37	3.1	12.1	3.37e-27	5.74	1.19e-16
chr20-90	chr20	37736548	37736690	+	8.63	0.762	40	37	3.1	12.1	3.37e-27	5.97	3.57e-17
chr20-103	chr20	37740951	37741093	+	8.63	0.662	39	37	2.3	16.14	1.69e-31	7.37	4.65e-20
chr20-105	chr20	42379911	42380053	+	8.63	0.685	39	37	8.4	4.4	3.39e-13	5.35	1.06e-15
chr20-111	chr20	44534340	44534482	+	8.63	0.781	38	37	4.6	8.07	2.5e-21	6.65	3.52e-18
chr20-107	chr20	48212457	48212599	+	8.63	0.75	39	37	4.6	8.07	2.5e-21	6.77	7.19e-19
chr20-113	chr20	60735124	60735266	+	8.63	0.656	38	37	6.9	5.38	8.88e-16	8.05	2.74e-21
chr20-114	chr20	61306787	61306929	+	8.63	0.754	38	37	4.6	8.07	2.5e-21	7.14	1.27e-19
chr21-48	chr21	34383885	34384027	+	8.63	0.783	39	37	8.4	4.4	3.39e-13	14.17	1.52e-29
chr21-49	chr21	36339848	36339990	+	8.63	0.703	39	37	3.8	9.68	6.17e-24	8.07	2.47e-21
chr21-53	chr21	38738899	38739041	+	8.63	0.763	38	37	3.1	12.1	3.37e-27	16.01	1.41e-30
chr22-8	chr22	46465705	46465847	+	8.63	0.827	36	37	3.1	12.1	3.37e-27	14.49	7e-30
chrX-38	chrX	131625325	131625467	+	8.63	0.878	39	37	1.5	24.2	1.08e-37	24.09	1.2e-36
chr1-302	chr1	3773736	3773878	+	8.4	0.848	35	36	4.6	7.85	2.03e-20	16.52	3.16e-30
chr1-263	chr1	6787645	6787787	+	8.4	0.844	36	36	4.6	7.85	2.03e-20	8.68	8.42e-22
chr1-236	chr1	8069755	8069897	+	8.4	0.658	37	37	3.1	12.1	3.37e-27	4.74	8.72e-14
chr1-266	chr1	21766547	21766689	+	8.4	0.759	36	36	2.3	15.7	2.73e-30	7.73	3.29e-20
chr1-239	chr1	23854799	23854941	+	8.4	0.641	37	36	5.4	6.73	2.48e-18	7.26	2.39e-19
chr1-204	chr1	29208714	29208856	+	8.4	0.697	39	36	3.8	9.42	6e-23	6.22	2.76e-17
chr1-274	chr1	65726687	65726829	+	8.4	0.768	36	36	3.8	9.42	6e-23	12.1	1.64e-26
chr1-277	chr1	78580217	78580359	+	8.4	0.833	36	36	0.8	47.1	7.86e-47	15.04	1.16e-29
chr1-211	chr1	90868795	90868937	+	8.4	0.796	39	36	3.1	11.78	4.09e-26	12.53	5.18e-27
chr1-248	chr1	110325992	110326134	+	8.4	0.738	37	36	7.6	4.71	1.02e-13	7.83	2.21e-20
chr1-281	chr1	145129785	145129927	+	8.4	0.727	36	36	3.8	9.42	6e-23	13.27	7.72e-28
chr1-252	chr1	145827067	145827209	+	8.4	0.833	37	37	5.4	6.92	3.57e-19	20.34	4.06e-34
chr1-288	chr1	156859990	156860132	+	8.4	0.727	36	36	3.1	11.78	4.09e-26	9.22	1.18e-22
chr1-255	chr1	161136088	161136230	+	8.4	0.745	37	36	3.1	11.78	4.09e-26	6.74	2.32e-18
chr1-256	chr1	199271831	199271973	+	8.4	0.741	37	36	4.6	7.85	2.03e-20	9.85	1.43e-23
chr1-217	chr1	202608822	202608964	+	8.4	0.662	39	36	3.8	9.42	6e-23	10.17	5e-24
chr1-297	chr1	210013374	210013516	+	8.4	0.592	36	36	0.8	47.1	7.86e-47	6.83	4.53e-18
chr1-300	chr1	235133196	235133338	+	8.4	0.706	36	37	3.8	9.68	6.17e-24	7.88	1.81e-20
chr2-185	chr2	9910648	9910790	+	8.4	0.726	36	36	3.1	11.78	4.09e-26	8.27	3.86e-21
chr2-192	chr2	12317256	12317398	+	8.4	0.657	35	36	6.9	5.23	4.8e-15	8.65	3.4e-21
chr2-176	chr2	85073160	85073302	+	8.4	0.812	37	36	2.3	15.7	2.73e-30	9.51	4.45e-23
chr2-168	chr2	98280574	98280716	+	8.4	0.794	38	37	6.1	6.05	2.38e-17	9.97	9.67e-24
chr2-161	chr2	225948102	225948244	+	8.4	0.653	39	36	3.1	11.78	4.09e-26	12.99	1.56e-27
chr3-103	chr3	16242000	16242142	+	8.4	0.784	36	36	3.1	11.78	4.09e-26	8.83	4.79e-22
chr3-81	chr3	58321969	58322111	+	8.4	0.776	38	36	2.3	15.7	2.73e-30	10.01	8.49e-24
chr3-91	chr3	71475001	71475143	+	8.4	0.787	37	36	2.3	15.7	2.73e-30	10.51	1.69e-24
chr3-117	chr3	94873636	94873778	+	8.4	0.722	35	36	2.3	15.7	2.73e-30	23.41	3.22e-36
chr3-94	chr3	99129690	99129832	+	8.4	0.65	37	36	6.1	5.89	1.45e-16	15.04	1.16e-29
chr3-106	chr3	127831326	127831468	+	8.4	0.75	36	36	2.3	15.7	2.73e-30	16.5	2.15e-29
chr3-85	chr3	179280525	179280667	+	8.4	0.636	38	36	5.4	6.73	2.48e-18	8.53	1.47e-21
chr3-101	chr3	197243414	197243556	+	8.4	0.697	37	36	2.3	15.7	2.73e-30	9.54	3.93e-23
chr4-65	chr4	1040333	1040475	+	8.4	0.584	39	36	6.9	5.23	4.8e-15	6.08	5.44e-17
chr4-83	chr4	2243958	2244100	+	8.4	0.649	37	36	4.6	7.85	2.03e-20	9.51	4.45e-23
chr4-84	chr4	2331916	2332058	+	8.4	0.618	37	36	2.3	15.7	2.73e-30	11.28	1.69e-25
chr4-96	chr4	39183698	39183840	+	8.4	0.742	36	36	3.1	11.78	4.09e-26	15.32	6.27e-30
chr4-103	chr4	78783849	78783991	+	8.4	0.755	36	36	3.1	11.78	4.09e-26	12.05	1.93e-26
chr4-104	chr4	95372856	95372998	+	8.4	0.8	36	36	1.5	23.55	2.62e-36	8.99	2.69e-22
chr4-105	chr4	125099245	125099387	+	8.4	0.86	36	36	0.8	47.1	7.86e-47	13.34	6.46e-28
chr4-90	chr4	155086548	155086690	+	8.4	0.611	37	36	3.1	11.78	4.09e-26	10.25	3.82e-24
chr5-105	chr5	13567217	13567359	+	8.4	0.651	36	36	3.1	11.78	4.09e-26	11.18	2.27e-25
chr5-106	chr5	16856742	16856884	+	8.4	0.8	36	36	4.6	7.85	2.03e-20	13.79	2.16e-28
chr5-93	chr5	17128170	17128312	+	8.4	0.724	37	36	3.8	9.42	6e-23	8.83	4.79e-22
chr5-95	chr5	57542641	57542783	+	8.4	0.683	37	36	2.3	15.7	2.73e-30	9.09	1.89e-22
chr5-109	chr5	102711279	102711421	+	8.4	0.833	36	36	3.1	11.78	4.09e-26	11.28	1.69e-25
chr5-110	chr5	112312171	112312313	+	8.4	0.768	36	36	7.6	4.71	1.02e-13	12.53	5.18e-27
chr5-100	chr5	134798040	134798182	+	8.4	0.613	37	36	6.1	5.89	1.45e-16	7.19	3.14e-19
chr5-123	chr5	143293093	143293235	+	8.4	0.788	35	36	5.4	6.73	2.48e-18	17.85	3.5e-32
chr5-91	chr5	148591853	148591995	+	8.4	0.657	38	38	4.6	8.29	3.01e-22	5.94	1.13e-16
chr5-103	chr5	158938717	158938859	+	8.4	0.717	37	36	4.6	7.85	2.03e-20	8.8	5.37e-22
chr5-73	chr5	171788595	171788737	+	8.4	0.731	40	36	4.6	7.85	2.03e-20	9.62	3.06e-23
chr6-314	chr6	436707	436849	+	8.4	0.778	38	36	3.8	9.42	6e-23	7.1	1.46e-18
chr6-337	chr6	1190776	1190918	+	8.4	0.7	37	36	6.9	5.23	4.8e-15	8.74	6.73e-22
chr6-338	chr6	1481619	1481761	+	8.4	0.792	37	36	6.9	5.23	4.8e-15	6.91	1.08e-18
chr6-291	chr6	3613077	3613219	+	8.4	0.8	39	36	4.6	7.85	2.03e-20	6.85	1.4e-18
chr6-340	chr6	4733252	4733394	+	8.4	0.662	37	36	6.1	5.89	1.45e-16	6.63	1.14e-17
chr6-316	chr6	6879736	6879878	+	8.4	0.69	38	37	7.6	4.84	2.09e-14	5.7	3.74e-16
chr6-292	chr6	8064575	8064717	+	8.4	0.675	39	37	7.6	4.84	2.09e-14	10.3	3.34e-24
chr6-341	chr6	8743534	8743676	+	8.4	0.75	37	36	3.1	11.78	4.09e-26	8.62	1.05e-21
chr6-448	chr6	10210401	10210543	+	8.4	0.737	34	36	5.4	6.73	2.48e-18	9.69	2.38e-23
chr6-379	chr6	11278487	11278629	+	8.4	0.789	36	36	8.4	4.28	1.5e-12	6.03	1.86e-16
chr6-415	chr6	14821143	14821285	+	8.4	0.672	35	36	6.9	5.23	4.8e-15	5.37	2.23e-15
chr6-381	chr6	16239677	16239819	+	8.4	0.542	36	36	6.9	5.23	4.8e-15	5.43	3.87e-15
chr6-383	chr6	24775077	24775219	+	8.4	0.704	36	36	8.4	4.28	1.5e-12	9.54	3.93e-23
chr6-351	chr6	28915661	28915803	+	8.4	0.634	37	36	4.6	7.85	2.03e-20	6.97	8.34e-19
chr6-352	chr6	28973400	28973542	+	8.4	0.768	37	36	8.4	4.28	1.5e-12	10.43	2.22e-24
chr6-388	chr6	30876161	30876303	+	8.4	0.613	36	36	6.1	5.89	1.45e-16	5.39	1.97e-15
chr6-389	chr6	31707623	31707765	+	8.4	0.683	36	36	4.6	7.85	2.03e-20	4.4	7.03e-13
chr6-391	chr6	35879814	35879956	+	8.4	0.721	36	36	3.8	9.42	6e-23	4.83	1.07e-13
chr6-392	chr6	36215894	36216036	+	8.4	0.657	36	36	8.4	4.28	1.5e-12	4.05	1.37e-11
chr6-328	chr6	37685733	37685875	+	8.4	0.647	38	36	6.9	5.23	4.8e-15	4.53	3.12e-13
chr6-362	chr6	39393884	39394026	+	8.4	0.641	37	36	0.8	47.1	7.86e-47	7.13	4.12e-19
chr6-365	chr6	42478674	42478816	+	8.4	0.661	37	36	5.4	6.73	2.48e-18	4.41	6.69e-13
chr6-369	chr6	43693436	43693578	+	8.4	0.71	37	37	5.4	6.92	3.57e-19	4.38	8.16e-13
chr6-370	chr6	44355150	44355292	+	8.4	0.686	37	36	5.4	6.73	2.48e-18	6.55	5.75e-18
chr6-335	chr6	52416253	52416395	+	8.4	0.618	38	36	5.4	6.73	2.48e-18	4.72	9.72e-14
chr6-403	chr6	74414597	74414739	+	8.4	0.597	36	37	5.4	6.92	3.57e-19	7.34	1.66e-19
chr6-407	chr6	150167568	150167710	+	8.4	0.694	36	36	0.8	47.1	7.86e-47	9.62	3.06e-23
chr7-57	chr7	73132432	73132574	+	8.4	0.75	39	36	3.1	11.78	4.09e-26	8.38	2.52e-21
chr7-64	chr7	129996059	129996201	+	8.4	0.702	37	36	5.4	6.73	2.48e-18	9.58	3.47e-23
chr7-71	chr7	132468775	132468917	+	8.4	0.809	36	36	1.5	23.55	2.62e-36	14.86	1.74e-29
chr7-65	chr7	151548186	151548328	+	8.4	0.696	37	36	4.6	7.85	2.03e-20	10.13	5.71e-24
chr8-108	chr8	121377495	121377637	+	8.4	0.78	36	36	3.8	9.42	6e-23	8.22	4.77e-21
chr8-94	chr8	123584585	123584727	+	8.4	0.683	37	36	0.8	47.1	7.86e-47	5.38	2.1e-15
chr8-89	chr8	124502697	124502839	+	8.4	0.6	38	36	6.1	5.89	1.45e-16	6.74	2.32e-18
chr8-95	chr8	124642624	124642766	+	8.4	0.7	37	37	7.6	4.84	2.09e-14	5.49	1.17e-15
chr8-98	chr8	126483622	126483764	+	8.4	0.732	37	36	3.8	9.42	6e-23	7.23	2.62e-19
chr8-99	chr8	126614929	126615071	+	8.4	0.632	37	36	5.4	6.73	2.48e-18	5.44	1.52e-15
chr8-122	chr8	130734408	130734550	+	8.4	0.656	35	36	3.1	11.78	4.09e-26	9.4	6.43e-23
chr8-103	chr8	134387800	134387942	+	8.4	0.522	37	37	5.4	6.92	3.57e-19	4.85	4.48e-14
chr8-112	chr8	144472327	144472469	+	8.4	0.494	36	36	4.6	7.85	2.03e-20	5.55	8.41e-16
chr8-113	chr8	146017871	146018013	+	8.4	0.759	36	36	7.6	4.71	1.02e-13	6.71	2.75e-18
chr9-97	chr9	112089730	112089872	+	8.4	0.597	36	36	5.4	6.73	2.48e-18	8.22	4.77e-21
chr9-99	chr9	117439763	117439905	+	8.4	0.75	36	36	1.5	23.55	2.62e-36	10.17	5e-24
chr9-90	chr9	132539512	132539654	+	8.4	0.727	37	36	7.6	4.71	1.02e-13	8.14	6.53e-21
chr9-100	chr9	132601081	132601223	+	8.4	0.687	36	36	6.1	5.89	1.45e-16	9.69	2.38e-23
chr9-91	chr9	140429442	140429584	+	8.4	0.768	37	36	3.8	9.42	6e-23	10.22	1.78e-23
chr9-92	chr9	140563763	140563905	+	8.4	0.633	37	36	3.8	9.42	6e-23	9.62	3.06e-23
chr10-141	chr10	3805448	3805590	+	8.4	0.683	36	36	6.9	5.23	4.8e-15	6.72	2.53e-18
chr10-143	chr10	13895996	13896138	+	8.4	0.635	36	36	2.3	15.7	2.73e-30	10.27	1.55e-23
chr10-146	chr10	25233819	25233961	+	8.4	0.603	36	36	5.4	6.73	2.48e-18	10.09	6.52e-24
chr10-157	chr10	25351520	25351662	+	8.4	0.696	35	36	3.8	9.42	6e-23	9.09	1.89e-22
chr10-147	chr10	68587073	68587215	+	8.4	0.688	36	36	3.1	11.78	4.09e-26	11.38	5.84e-25
chr10-124	chr10	71599639	71599781	+	8.4	0.629	38	37	9.2	4.03	4.05e-12	9.09	1.89e-22
chr10-112	chr10	75759123	75759265	+	8.4	0.746	40	36	4.6	7.85	2.03e-20	8.11	7.25e-21
chr10-136	chr10	80717371	80717513	+	8.4	0.75	37	36	3.1	11.78	4.09e-26	6.23	2.56e-17
chr10-130	chr10	116456951	116457093	+	8.4	0.887	38	36	4.6	7.85	2.03e-20	14.1	1.02e-28
chr11-146	chr11	10320010	10320152	+	8.4	0.7	36	36	3.8	9.42	6e-23	9.66	2.7e-23
chr11-148	chr11	57409017	57409159	+	8.4	0.754	36	36	6.9	5.23	4.8e-15	7.3	1.99e-19
chr11-137	chr11	64546275	64546417	+	8.4	0.644	37	37	3.1	12.1	3.37e-27	8.44	2.03e-21
chr11-127	chr11	74384142	74384284	+	8.4	0.672	38	36	2.3	15.7	2.73e-30	8.44	2.03e-21
chr11-144	chr11	124953017	124953159	+	8.4	0.712	37	36	5.4	6.73	2.48e-18	5.77	2.64e-16
chr12-137	chr12	84908052	84908194	+	8.4	0.826	36	36	1.5	23.55	2.62e-36	20.51	3.06e-34
chr12-127	chr12	95010311	95010453	+	8.4	0.776	37	36	6.1	5.89	1.45e-16	5.73	8.3e-16
chr12-130	chr12	96821187	96821329	+	8.4	0.646	37	36	3.1	11.78	4.09e-26	6.13	4.35e-17
chr12-123	chr12	120729830	120729972	+	8.4	0.7	38	36	3.8	9.42	6e-23	5.39	1.97e-15
chr12-124	chr12	120755441	120755583	+	8.4	0.682	38	36	3.8	9.42	6e-23	5.8	2.3e-16
chr13-14	chr13	102050261	102050403	+	8.4	0.774	37	36	3.1	11.78	4.09e-26	13.49	4.5e-28
chr13-15	chr13	106756207	106756349	+	8.4	0.737	36	36	2.3	15.7	2.73e-30	12.6	4.38e-27
chr14-134	chr14	23947591	23947733	+	8.4	0.816	34	36	3.8	9.42	6e-23	10.56	1.47e-24
chr14-100	chr14	35169124	35169266	+	8.4	0.731	36	36	6.9	5.23	4.8e-15	9.36	7.27e-23
chr14-77	chr14	59828000	59828142	+	8.4	0.614	39	36	6.1	5.89	1.45e-16	6.46	8.59e-18
chr14-106	chr14	61190996	61191138	+	8.4	0.712	36	36	5.4	6.73	2.48e-18	8.47	1.82e-21
chr14-127	chr14	65007294	65007436	+	8.4	0.719	35	36	4.6	7.85	2.03e-20	11.28	1.69e-25
chr14-89	chr14	74353285	74353427	+	8.4	0.671	38	36	4.6	7.85	2.03e-20	8.44	2.03e-21
chr14-90	chr14	75046562	75046704	+	8.4	0.584	38	36	8.4	4.28	1.5e-12	5.76	2.83e-16
chr14-109	chr14	77923989	77924131	+	8.4	0.579	36	36	5.4	6.73	2.48e-18	9.97	9.67e-24
chr14-111	chr14	100687980	100688122	+	8.4	0.611	36	36	2.3	15.7	2.73e-30	6.45	9.3e-18
chr14-97	chr14	100844240	100844382	+	8.4	0.703	37	38	6.9	5.52	1.6e-16	6.33	1.61e-17
chr14-114	chr14	104091206	104091348	+	8.4	0.625	36	36	5.4	6.73	2.48e-18	6.82	1.66e-18
chr16-56	chr16	28857779	28857921	+	8.4	0.738	39	36	0.8	47.1	7.86e-47	12.99	1.56e-27
chr16-60	chr16	28962008	28962150	+	8.4	0.581	38	36	1.5	23.55	2.62e-36	7.61	1.74e-19
chr16-61	chr16	31484315	31484457	+	8.4	0.768	38	36	7.6	4.71	1.02e-13	11.18	2.27e-25
chr16-65	chr16	48443996	48444138	+	8.4	0.71	37	36	1.5	23.55	2.62e-36	11.82	3.64e-26
chr16-63	chr16	71012388	71012530	+	8.4	0.738	38	37	2.3	16.14	1.69e-31	6.82	1.66e-18
chr17-138	chr17	7210589	7210731	+	8.4	0.629	38	36	6.9	5.23	4.8e-15	9.85	1.43e-23
chr17-179	chr17	16341937	16342079	+	8.4	0.632	35	36	1.5	23.55	2.62e-36	6.71	2.75e-18
chr17-155	chr17	19967273	19967415	+	8.4	0.692	37	36	2.3	15.7	2.73e-30	10.74	8.37e-25
chr17-143	chr17	37557907	37558049	+	8.4	0.792	38	36	6.9	5.23	4.8e-15	13.56	3.75e-28
chr17-156	chr17	39653114	39653256	+	8.4	0.741	37	36	3.1	11.78	4.09e-26	5.58	7.36e-16
chr17-145	chr17	40610737	40610879	+	8.4	0.684	38	36	1.5	23.55	2.62e-36	8.21	1.72e-20
chr17-171	chr17	40819557	40819699	+	8.4	0.707	36	36	6.1	5.89	1.45e-16	9.12	1.68e-22
chr17-162	chr17	45940545	45940687	+	8.4	0.73	37	36	4.6	7.85	2.03e-20	10.09	6.52e-24
chr17-164	chr17	63581548	63581690	+	8.4	0.796	37	36	0.4	94.2	1.68e-57	8	1.09e-20
chr17-165	chr17	78958658	78958800	+	8.4	0.773	37	36	4.6	7.85	2.03e-20	6.67	3.24e-18
chr18-38	chr18	24716187	24716329	+	8.4	0.69	37	36	3.8	9.42	6e-23	12.06	8.99e-26
chr19-219	chr19	572299	572441	+	8.4	0.759	36	36	3.8	9.42	6e-23	13.2	9.23e-28
chr19-221	chr19	7903163	7903305	+	8.4	0.553	36	36	0.4	94.2	1.68e-57	5.23	1.14e-14
chr19-222	chr19	8516764	8516906	+	8.4	0.579	36	36	6.1	5.89	1.45e-16	6.85	1.4e-18
chr19-205	chr19	8634046	8634188	+	8.4	0.741	37	36	6.9	5.23	4.8e-15	6.56	5.3e-18
chr19-223	chr19	11457171	11457313	+	8.4	0.677	36	36	6.9	5.23	4.8e-15	5.5	2.79e-15
chr19-235	chr19	11849789	11849931	+	8.4	0.778	35	36	7.6	4.71	1.02e-13	10.19	8.26e-23
chr19-225	chr19	14493833	14493975	+	8.4	0.778	36	36	7.6	4.71	1.02e-13	4.72	9.72e-14
chr19-214	chr19	18682555	18682697	+	8.4	0.622	37	36	5.4	6.73	2.48e-18	4.76	7.39e-14
chr19-261	chr19	27889241	27889383	+	8.4	0.621	34	36	4.6	7.85	2.03e-20	4.74	8.25e-14
chr19-215	chr19	34723829	34723971	+	8.4	0.593	37	37	2.3	16.14	1.69e-31	8.08	8.03e-21
chr19-217	chr19	43820950	43821092	+	8.4	0.706	37	36	5.4	6.73	2.48e-18	10.43	2.22e-24
chr19-228	chr19	46087552	46087694	+	8.4	0.648	36	36	4.6	7.85	2.03e-20	7.05	5.87e-19
chr20-135	chr20	23133224	23133366	+	8.4	0.706	35	36	5.4	6.73	2.48e-18	7.22	8.53e-19
chr20-124	chr20	42712044	42712186	+	8.4	0.778	36	36	5.4	6.73	2.48e-18	7.5	8.61e-20
chr20-115	chr20	62790326	62790468	+	8.4	0.736	38	36	4.6	7.85	2.03e-20	6.28	2.03e-17
chr21-47	chr21	18833475	18833617	+	8.4	0.875	39	36	6.1	5.89	1.45e-16	12.1	1.64e-26
chrX-40	chrX	149108216	149108358	+	8.4	0.577	37	36	3.8	9.42	6e-23	9.5	1.81e-22
chr1-303	chr1	6684790	6684932	+	8.17	0.759	35	35	6.9	5.09	2.53e-14	12.57	2.41e-26
chr1-238	chr1	20042147	20042289	+	8.17	0.765	37	35	5.4	6.54	1.68e-17	13.79	1.19e-27
chr1-265	chr1	20820357	20820499	+	8.17	0.689	36	35	2.3	15.26	4.29e-29	7	6.75e-18
chr1-240	chr1	24593152	24593294	+	8.17	0.714	37	35	4.6	7.63	1.6e-19	10.54	6.84e-24
chr1-305	chr1	27449179	27449321	+	8.17	0.705	35	35	4.6	7.63	1.6e-19	9.14	6.07e-22
chr1-369	chr1	32155612	32155754	+	8.17	0.875	33	35	6.1	5.72	8.58e-16	10.22	1.78e-23
chr1-242	chr1	32787768	32787910	+	8.17	0.576	37	35	3.8	9.16	5.67e-22	8.41	8.17e-21
chr1-308	chr1	36816670	36816812	+	8.17	0.746	35	35	1.5	22.9	6.19e-35	5.21	1.28e-14
chr1-310	chr1	43388778	43388920	+	8.17	0.796	35	35	2.3	15.26	4.29e-29	7.96	4.36e-20
chr1-270	chr1	43432918	43433060	+	8.17	0.667	36	35	2.3	15.26	4.29e-29	7.56	2.11e-19
chr1-271	chr1	46598517	46598659	+	8.17	0.633	36	36	3.8	9.42	6e-23	7.12	1.34e-18
chr1-272	chr1	55487758	55487900	+	8.17	0.687	36	35	4.6	7.63	1.6e-19	9.77	7.5e-23
chr1-311	chr1	55886782	55886924	+	8.17	0.636	35	35	7.6	4.58	4.83e-13	6.81	1.47e-17
chr1-316	chr1	86072792	86072934	+	8.17	0.686	35	36	3.1	11.78	4.09e-26	7.12	3.97e-18
chr1-246	chr1	95201241	95201383	+	8.17	0.815	37	35	4.6	7.63	1.6e-19	9.57	1.41e-22
chr1-317	chr1	95205459	95205601	+	8.17	0.75	35	35	6.9	5.09	2.53e-14	9.54	1.6e-22
chr1-247	chr1	101836841	101836983	+	8.17	0.803	37	37	4.6	8.07	2.5e-21	11.6	3.17e-25
chr1-318	chr1	109642721	109642863	+	8.17	0.792	35	36	4.6	7.85	2.03e-20	13.3	1.09e-25
chr1-279	chr1	115857567	115857709	+	8.17	0.577	36	35	1.5	22.9	6.19e-35	10.18	2.03e-23
chr1-250	chr1	143543681	143543823	+	8.17	0.78	37	35	8.4	4.16	6.49e-12	12.6	1.12e-25
chr1-253	chr1	150208541	150208683	+	8.17	0.758	37	35	6.1	5.72	8.58e-16	5.93	3.09e-16
chr1-282	chr1	151521404	151521546	+	8.17	0.712	36	35	3.8	9.16	5.67e-22	10.49	7.85e-24
chr1-285	chr1	153539058	153539200	+	8.17	0.635	36	37	7.6	4.84	2.09e-14	5.92	8.47e-16
chr1-320	chr1	154391049	154391191	+	8.17	0.662	35	35	4.6	7.63	1.6e-19	7.76	9.69e-20
chr1-289	chr1	161062655	161062797	+	8.17	0.746	36	35	3.8	9.16	5.67e-22	8.56	4.74e-21
chr1-322	chr1	162509047	162509189	+	8.17	0.788	35	35	4.6	7.63	1.6e-19	7.07	1.6e-18
chr1-290	chr1	164620928	164621070	+	8.17	0.833	36	36	4.6	7.85	2.03e-20	10.87	2.55e-24
chr1-292	chr1	173362374	173362516	+	8.17	0.667	36	35	5.4	6.54	1.68e-17	9.57	1.41e-22
chr1-294	chr1	203876130	203876272	+	8.17	0.792	36	35	3.1	11.45	4.82e-25	14.45	2.6e-28
chr1-257	chr1	204490522	204490664	+	8.17	0.671	37	35	4.6	7.63	1.6e-19	6.33	4.42e-17
chr1-296	chr1	206652946	206653088	+	8.17	0.809	36	35	3.1	11.45	4.82e-25	8.41	8.17e-21
chr1-261	chr1	215130696	215130838	+	8.17	0.774	37	35	5.4	6.54	1.68e-17	15.08	6.4e-29
chr1-355	chr1	218553913	218554055	+	8.17	0.651	34	36	5.4	6.73	2.48e-18	7.86	2.12e-19
chr1-402	chr1	219596142	219596284	+	8.17	0.759	33	35	3.1	11.45	4.82e-25	15.47	2.79e-29
[truncated: 36,084 more rows]
