# Supplementary material for: SCIRT lncRNA Restrains Tumorigenesis by Opposing Transcriptional Programs of Tumor-Initiating Cells
Source: Oxford University Press journal article supplement (doi:10.1158/0008-5472.can-20-2612), 2020-11-10
Supplement: 00085472can202612-sup-248586_2_supp_6687198_qnyknn.xlsx [file 00085472can202612-sup-248586_2_supp_6687198_qnyknn.xlsx]

## Sheet: siEZH2 vs siNC
Gene Symbol	Gencode	Biotype	baseMean	log2FoldChange	lfcSE	stat	pvalue	padj
LIPA	ENSG00000107798.13	protein_coding	2417.79	-1.10767	0.108198	-10.2374	1.34774e-24	8.98878e-21
CSF2	ENSG00000164400.4	protein_coding	732.134	1.24833	0.121541	10.2709	9.53337e-25	8.98878e-21
IL8	ENSG00000169429.6	protein_coding	9817.93	1.08102	0.107858	10.0226	1.213e-23	5.39342e-20
TPX2	ENSG00000088325.11	protein_coding	1163.85	1.07143	0.114656	9.34472	9.213e-21	3.0723e-17
TIMP2	ENSG00000035862.8	protein_coding	16515.3	-0.88738	0.0993216	-8.93441	4.09359e-19	1.09209e-15
HJURP	ENSG00000123485.7	protein_coding	702.623	1.08186	0.12611	8.57877	9.58956e-18	2.13192e-14
GFPT1	ENSG00000198380.8	protein_coding	2369.01	-0.878502	0.103998	-8.4473	2.98122e-17	5.68092e-14
LAPTM4A	ENSG00000068697.6	protein_coding	8028.57	-0.823252	0.0985551	-8.35321	6.64301e-17	9.84567e-14
TNFAIP3	ENSG00000118503.10	protein_coding	3941.87	0.821639	0.0982175	8.36551	5.98565e-17	9.84567e-14
KIFC1	ENSG00000237649.3	protein_coding	817.744	0.978298	0.119389	8.19421	2.52239e-16	3.36462e-13
B3GNT1	ENSG00000174684.6	protein_coding	1235.74	-0.895155	0.109442	-8.17924	2.85647e-16	3.46386e-13
PRR11	ENSG00000068489.8	protein_coding	399.365	1.10204	0.136915	8.04911	8.33964e-16	9.27021e-13
CIT	ENSG00000122966.9	protein_coding	536.562	1.04138	0.130398	7.98615	1.39214e-15	1.42844e-12
AURKA	ENSG00000087586.13	protein_coding	704.749	0.986476	0.12624	7.81431	5.52641e-15	5.26549e-12
KIF20A	ENSG00000112984.7	protein_coding	492.652	1.07643	0.138058	7.79697	6.34121e-15	5.63903e-12
PTGS2	ENSG00000073756.7	protein_coding	2795.54	0.827823	0.107098	7.72961	1.07877e-14	8.99361e-12
SPAG5	ENSG00000076382.12	protein_coding	495.384	1.05246	0.138592	7.59399	3.102e-14	2.43397e-11
LOXL4	ENSG00000138131.3	protein_coding	12169.1	-0.790016	0.105227	-7.5077	6.01731e-14	4.45916e-11
MKI67	ENSG00000148773.8	protein_coding	1014.79	0.928763	0.124804	7.4418	9.93192e-14	6.97273e-11
KIF4A	ENSG00000090889.10	protein_coding	341.542	1.07736	0.146255	7.36634	1.75378e-13	1.16968e-10
TOP2A	ENSG00000131747.10	protein_coding	1686.41	0.880055	0.120483	7.30438	2.78541e-13	1.76927e-10
MICB	ENSG00000204516.5	protein_coding	2449.39	0.809252	0.115087	7.03165	2.04099e-12	1.18368e-09
ZWINT	ENSG00000122952.12	protein_coding	595.43	0.898338	0.127756	7.03168	2.04063e-12	1.18368e-09
ASF1B	ENSG00000105011.4	protein_coding	388.398	0.949319	0.137504	6.90391	5.05901e-12	2.81176e-09
CCNB1	ENSG00000134057.10	protein_coding	866.294	0.907688	0.132203	6.86588	6.60813e-12	3.52584e-09
PRC1	ENSG00000198901.9	protein_coding	619.76	0.866028	0.127964	6.76775	1.30801e-11	6.71061e-09
IQGAP3	ENSG00000183856.6	protein_coding	931.926	0.835312	0.125732	6.64359	3.06131e-11	1.5124e-08
C1S	ENSG00000182326.10	protein_coding	462.464	-0.874617	0.132129	-6.6194	3.60653e-11	1.71813e-08
CDC20	ENSG00000117399.9	protein_coding	680.826	0.833163	0.126244	6.59965	4.12133e-11	1.89567e-08
UBE2C	ENSG00000175063.12	protein_coding	716.573	0.849531	0.131697	6.45064	1.11381e-10	4.95236e-08
ADM	ENSG00000148926.5	protein_coding	11208.6	0.773692	0.120905	6.39916	1.56238e-10	6.51267e-08
MLF1IP	ENSG00000151725.7	protein_coding	378.145	0.916515	0.143134	6.40321	1.52144e-10	6.51267e-08
PPT2	ENSG00000221988.8	protein_coding	939.023	-0.741418	0.118708	-6.24573	4.21835e-10	1.70511e-07
DLGAP5	ENSG00000126787.8	protein_coding	526.744	0.905958	0.145326	6.23397	4.54758e-10	1.78412e-07
MMP10	ENSG00000166670.5	protein_coding	348.62	0.904223	0.145356	6.22077	4.94728e-10	1.88548e-07
KIF2C	ENSG00000142945.8	protein_coding	568.215	0.819938	0.132488	6.18877	6.06347e-10	2.24668e-07
LMNB1	ENSG00000113368.7	protein_coding	692.308	0.759637	0.122943	6.17878	6.45981e-10	2.32885e-07
MYH10	ENSG00000133026.8	protein_coding	411.509	-0.860289	0.139487	-6.16753	6.93669e-10	2.43496e-07
F2RL1	ENSG00000164251.4	protein_coding	10650	0.575222	0.0936254	6.14387	8.0536e-10	2.75454e-07
DTL	ENSG00000143476.13	protein_coding	218.107	0.979208	0.160031	6.11885	9.42543e-10	3.14315e-07
CDC25A	ENSG00000164045.7	protein_coding	166.1	0.969694	0.159577	6.07665	1.22716e-09	3.99247e-07
TK1	ENSG00000167900.7	protein_coding	489.902	0.81389	0.13418	6.06564	1.31426e-09	4.17403e-07
TCF19	ENSG00000137310.7	protein_coding	519.024	0.782587	0.130442	5.9995	1.97932e-09	5.86714e-07
CDCA8	ENSG00000134690.6	protein_coding	349.149	0.847375	0.141166	6.00267	1.94104e-09	5.86714e-07
KIF18B	ENSG00000186185.9	protein_coding	245.227	0.901627	0.15015	6.00483	1.91533e-09	5.86714e-07
CDCA5	ENSG00000146670.5	protein_coding	429.916	0.837766	0.140197	5.97563	2.29202e-09	6.64637e-07
PDIA3	ENSG00000167004.8	protein_coding	12271.9	-0.567136	0.0950876	-5.96435	2.45611e-09	6.97065e-07
GJB2	ENSG00000165474.5	protein_coding	714.833	0.742798	0.126205	5.88563	3.96551e-09	1.102e-06
TNPO1	ENSG00000083312.13	protein_coding	6510.73	-0.598801	0.102231	-5.85733	4.70355e-09	1.28042e-06
RECQL4	ENSG00000160957.8	protein_coding	567.813	0.740238	0.127144	5.82206	5.81265e-09	1.5507e-06
HMGB2	ENSG00000164104.7	protein_coding	1314.07	0.664909	0.114571	5.80348	6.49524e-09	1.69882e-06
FEN1	ENSG00000168496.3	protein_coding	1042.82	0.665106	0.114734	5.79694	6.75355e-09	1.73242e-06
TTK	ENSG00000112742.5	protein_coding	248.392	0.934006	0.161224	5.79322	6.9051e-09	1.73787e-06
HDAC1	ENSG00000116478.7	protein_coding	8496.73	0.558607	0.0967158	5.77576	7.66076e-09	1.89235e-06
CENPF	ENSG00000117724.8	protein_coding	870.46	0.742755	0.129054	5.75538	8.64465e-09	2.09656e-06
GNS	ENSG00000135677.6	protein_coding	11622.6	0.515213	0.0897503	5.74052	9.43874e-09	2.20883e-06
IL1B	ENSG00000125538.7	protein_coding	663.087	0.753413	0.131203	5.74237	9.33627e-09	2.20883e-06
E2F1	ENSG00000101412.9	protein_coding	373.393	0.808102	0.141277	5.72	1.06525e-08	2.44989e-06
RRM2	ENSG00000171848.9	protein_coding	436.158	0.827103	0.145735	5.67537	1.38387e-08	3.12872e-06
GFPT2	ENSG00000131459.8	protein_coding	5533.95	-0.583191	0.104137	-5.6002	2.14105e-08	4.75991e-06
ZNF367	ENSG00000165244.6	protein_coding	181.838	0.892226	0.159627	5.58943	2.27819e-08	4.98178e-06
PTX3	ENSG00000163661.3	protein_coding	4419.88	0.530254	0.0954834	5.55336	2.80224e-08	6.02888e-06
ETV5	ENSG00000244405.3	protein_coding	2177.37	-0.58532	0.105994	-5.52222	3.34743e-08	7.0009e-06
FAM83D	ENSG00000101447.9	protein_coding	244.654	0.83571	0.151353	5.52161	3.359e-08	7.0009e-06
BUB1	ENSG00000169679.10	protein_coding	300.946	0.80996	0.147182	5.50313	3.73116e-08	7.65692e-06
HIST1H2BK	ENSG00000197903.6	protein_coding	4597.53	0.538968	0.0981824	5.48946	4.0317e-08	7.93706e-06
CDC6	ENSG00000094804.5	protein_coding	446.718	0.745983	0.13591	5.48882	4.04618e-08	7.93706e-06
FAM64A	ENSG00000129195.11	protein_coding	189.41	0.872589	0.158826	5.49398	3.92968e-08	7.93706e-06
RAB27B	ENSG00000041353.5	protein_coding	1904.61	-0.638879	0.116685	-5.47526	4.36858e-08	8.44529e-06
TRAF1	ENSG00000056558.6	protein_coding	3562.7	0.54025	0.0990269	5.45559	4.88101e-08	9.30111e-06
PXDN	ENSG00000130508.6	protein_coding	50308.7	0.526538	0.0968786	5.43503	5.47885e-08	1.02933e-05
EZH2	ENSG00000106462.6	protein_coding	400.043	-0.735432	0.135502	-5.42746	5.71622e-08	1.05901e-05
PTEN	ENSG00000171862.5	protein_coding	3147.49	-0.579872	0.107136	-5.41248	6.21587e-08	1.1358e-05
TPCN1	ENSG00000186815.8	protein_coding	7907.71	-0.527149	0.0975126	-5.40596	6.44628e-08	1.16199e-05
S1PR3	ENSG00000213694.3	protein_coding	473.729	0.715453	0.132422	5.40283	6.55975e-08	1.16667e-05
DYNC2LI1	ENSG00000138036.14	protein_coding	428.187	-0.74376	0.138535	-5.36875	7.92828e-08	1.35584e-05
B4GALT1	ENSG00000086062.8	protein_coding	6753.76	-0.516721	0.0962143	-5.37052	7.85093e-08	1.35584e-05
LDHAP4	ENSG00000214110.3	pseudogene	1805.69	0.560268	0.104279	5.37279	7.75284e-08	1.35584e-05
ARL6IP5	ENSG00000144746.6	protein_coding	7035.85	-0.52043	0.0975034	-5.33755	9.42097e-08	1.55144e-05
TNC	ENSG00000041982.10	protein_coding	16204.9	0.526607	0.0986505	5.33811	9.39218e-08	1.55144e-05
CDK1	ENSG00000170312.11	protein_coding	524.666	0.806047	0.15101	5.33771	9.41295e-08	1.55144e-05
THRA	ENSG00000126351.8	protein_coding	1462.24	-0.600572	0.112697	-5.32907	9.87175e-08	1.60584e-05
PYROXD2	ENSG00000119943.6	protein_coding	1615.35	-0.556891	0.105601	-5.27352	1.33831e-07	2.15081e-05
ETS1	ENSG00000134954.10	protein_coding	8110.71	0.508097	0.0967638	5.2509	1.51355e-07	2.40348e-05
IFIT1	ENSG00000185745.8	protein_coding	921.929	0.624437	0.119105	5.24273	1.58215e-07	2.48286e-05
CXCR4	ENSG00000121966.6	protein_coding	3126.26	0.581955	0.11108	5.23907	1.61387e-07	2.50319e-05
COL4A1	ENSG00000187498.10	protein_coding	2130.32	0.567321	0.10837	5.23504	1.64947e-07	2.529e-05
HTRA1	ENSG00000166033.7	protein_coding	3504.31	-0.514107	0.0984883	-5.21998	1.78939e-07	2.71215e-05
NUF2	ENSG00000143228.8	protein_coding	235.482	0.805001	0.154277	5.2179	1.80959e-07	2.71215e-05
HCP5	ENSG00000206337.6	sense_overlapping	315.656	-0.744373	0.143331	-5.19339	2.065e-07	3.06057e-05
ASPM	ENSG00000066279.12	protein_coding	554.908	0.73808	0.142286	5.1873	2.13362e-07	3.12751e-05
S100P	ENSG00000163993.6	protein_coding	523.217	-0.690893	0.13405	-5.15399	2.54995e-07	3.67029e-05
CPD	ENSG00000108582.7	protein_coding	16506.4	-0.550114	0.106749	-5.15334	2.55894e-07	3.67029e-05
UBE2D1	ENSG00000072401.10	protein_coding	1690.56	0.580347	0.112919	5.13949	2.75479e-07	3.90916e-05
FOXM1	ENSG00000111206.8	protein_coding	344.873	0.718974	0.140172	5.12921	2.90963e-07	4.08543e-05
CIITA	ENSG00000179583.13	protein_coding	1631.06	-0.587608	0.114952	-5.11175	3.19184e-07	4.435e-05
NDUFA12	ENSG00000184752.8	protein_coding	1374.23	-0.609757	0.119521	-5.10169	3.36641e-07	4.62933e-05
BHLHE40	ENSG00000134107.4	protein_coding	17403.5	0.589656	0.116525	5.06032	4.18547e-07	5.69693e-05
PSMB9	ENSG00000240065.3	protein_coding	415.441	-0.687278	0.13624	-5.04462	4.54413e-07	6.12264e-05
ALCAM	ENSG00000170017.8	protein_coding	6120.22	-0.515165	0.102476	-5.02717	4.97763e-07	6.63966e-05
NECAP2	ENSG00000157191.15	protein_coding	6629.19	0.497099	0.098959	5.02328	5.0796e-07	6.7086e-05
AKR1C3	ENSG00000196139.7	protein_coding	721.362	-0.639751	0.12768	-5.01057	5.42703e-07	7.02826e-05
VIPR1	ENSG00000114812.8	protein_coding	2204.05	-0.599597	0.119652	-5.01117	5.41004e-07	7.02826e-05
PPP1R15A	ENSG00000087074.7	protein_coding	6881.93	0.527865	0.105529	5.00209	5.6713e-07	7.27399e-05
CDK2AP1	ENSG00000111328.2	protein_coding	1469.11	0.532832	0.106667	4.99529	5.87483e-07	7.46327e-05
PTTG1	ENSG00000164611.8	protein_coding	1022.62	0.604516	0.121447	4.97762	6.43724e-07	8.1006e-05
TACC3	ENSG00000013810.14	protein_coding	649.608	0.616257	0.123931	4.97257	6.60724e-07	8.23683e-05
NCAPH	ENSG00000121152.5	protein_coding	259.09	0.762383	0.153737	4.95902	7.08485e-07	8.75044e-05
LDHA	ENSG00000134333.9	protein_coding	120835	0.487788	0.0986849	4.94288	7.69764e-07	9.41533e-05
GJA1	ENSG00000152661.7	protein_coding	1248.58	0.560022	0.113337	4.9412	7.76435e-07	9.41533e-05
TXNIP	ENSG00000117289.7	protein_coding	26442.2	-0.444222	0.0899531	-4.93838	7.87753e-07	9.46653e-05
RAB7A	ENSG00000075785.8	protein_coding	9203.02	0.49317	0.100001	4.93165	8.15385e-07	9.71109e-05
SEMA4B	ENSG00000185033.10	protein_coding	10138.5	-0.533704	0.108575	-4.91554	8.85358e-07	0.000102972
SEC23A	ENSG00000100934.10	protein_coding	3197.08	-0.520639	0.105928	-4.91502	8.87755e-07	0.000102972
CEP55	ENSG00000138180.11	protein_coding	370.197	0.721607	0.146749	4.91728	8.77552e-07	0.000102972
AP2B1	ENSG00000006125.12	protein_coding	21636.9	0.463565	0.094458	4.90762	9.21861e-07	0.000106006
SLC25A46	ENSG00000164209.12	protein_coding	1711.29	-0.586847	0.119673	-4.90373	9.40321e-07	0.000107205
SNED1	ENSG00000162804.9	protein_coding	1094.37	-0.625879	0.127752	-4.89919	9.62335e-07	0.000108785
MCM10	ENSG00000065328.12	protein_coding	105.142	0.820663	0.168066	4.88299	1.0449e-06	0.000117125
CDC25C	ENSG00000158402.14	protein_coding	95.2502	0.823705	0.168757	4.881	1.05548e-06	0.000117326
CCNB2	ENSG00000157456.3	protein_coding	277.312	0.756412	0.155371	4.86842	1.12496e-06	0.000124016
SLC43A2	ENSG00000167703.10	protein_coding	983.032	-0.666083	0.137486	-4.84472	1.26792e-06	0.000138629
HLA-DRA	ENSG00000204287.9	protein_coding	14536.5	-0.450864	0.0931145	-4.84203	1.28516e-06	0.000139372
BMP2	ENSG00000125845.6	protein_coding	1390.92	0.565765	0.117155	4.82921	1.37075e-06	0.000147455
SECTM1	ENSG00000141574.3	protein_coding	535.553	-0.643029	0.133308	-4.82362	1.40978e-06	0.00015044
FAM49B	ENSG00000153310.14	protein_coding	2205.44	0.523596	0.108622	4.82033	1.4332e-06	0.000151726
DDX10	ENSG00000178105.5	protein_coding	1752.23	0.504217	0.104688	4.81639	1.46177e-06	0.000153532
ROR1	ENSG00000185483.7	protein_coding	705.868	-0.63416	0.132136	-4.79928	1.59233e-06	0.000165938
BUB1B	ENSG00000156970.8	protein_coding	165.405	0.773242	0.161227	4.79597	1.61888e-06	0.000167397
HSPA8	ENSG00000109971.9	protein_coding	59558.9	0.423238	0.0884835	4.78324	1.72489e-06	0.000176987
FAM73A	ENSG00000180488.10	protein_coding	351.991	-0.685428	0.144125	-4.7558	1.97667e-06	0.000198246
SPRY2	ENSG00000136158.6	protein_coding	7744.21	0.572228	0.120277	4.7576	1.95911e-06	0.000198246
MAD2L1	ENSG00000164109.9	protein_coding	440.997	0.686671	0.144379	4.75601	1.97452e-06	0.000198246
MYO1F	ENSG00000142347.12	protein_coding	637.858	-0.608441	0.128215	-4.74547	2.08021e-06	0.000207074
SORCS2	ENSG00000184985.12	protein_coding	1040.11	-0.560011	0.118119	-4.74108	2.12583e-06	0.000210048
WDHD1	ENSG00000198554.7	protein_coding	347.295	0.679978	0.143513	4.7381	2.15735e-06	0.00021005
GINS1	ENSG00000101003.8	protein_coding	179.83	0.76271	0.160926	4.73949	2.14252e-06	0.00021005
EGR1	ENSG00000120738.7	protein_coding	2091.74	0.547147	0.115677	4.72994	2.24581e-06	0.000217079
LTBP1	ENSG00000049323.11	protein_coding	16401.7	0.443723	0.0938611	4.72745	2.27357e-06	0.000218181
AURKB	ENSG00000178999.8	protein_coding	213.624	0.735014	0.155653	4.72213	2.33386e-06	0.000222367
DNMT1	ENSG00000130816.10	protein_coding	4585.8	0.444028	0.0943055	4.7084	2.49675e-06	0.000236199
CCNA2	ENSG00000145386.5	protein_coding	501.256	0.666559	0.141625	4.70652	2.51976e-06	0.000236698
MMP3	ENSG00000149968.7	protein_coding	66.3121	0.788523	0.168064	4.69182	2.7079e-06	0.000252592
FAM174B	ENSG00000185442.8	protein_coding	609.179	-0.588688	0.125709	-4.68294	2.82793e-06	0.000260258
ABCC3	ENSG00000108846.11	protein_coding	2590.12	-0.472944	0.101068	-4.67946	2.87626e-06	0.000260258
NQO1	ENSG00000181019.8	protein_coding	3959.6	-0.469856	0.100409	-4.67942	2.87681e-06	0.000260258
TRIML2	ENSG00000179046.4	protein_coding	359.184	0.648721	0.138563	4.68178	2.84395e-06	0.000260258
DEPDC1	ENSG00000024526.12	protein_coding	235.128	0.753537	0.161059	4.67865	2.88764e-06	0.000260258
IGFBP5	ENSG00000115461.4	protein_coding	147.136	0.772418	0.165221	4.67506	2.93863e-06	0.000263076
MELK	ENSG00000165304.3	protein_coding	269.892	0.701088	0.150107	4.6706	3.00321e-06	0.000267065
MYBL2	ENSG00000101057.11	protein_coding	199.98	0.722578	0.154832	4.66685	3.05847e-06	0.000270178
TMEM45A	ENSG00000181458.6	protein_coding	2632.07	0.502445	0.107721	4.66431	3.09651e-06	0.000271739
SVIP	ENSG00000198168.4	protein_coding	908.642	0.587054	0.125937	4.6615	3.13908e-06	0.000273675
ECH1	ENSG00000104823.4	protein_coding	1674.12	-0.498817	0.107353	-4.6465	3.37607e-06	0.000292425
CTD-2510F5.4	ENSG00000265415.1	antisense	62.4693	0.776333	0.167263	4.6414	3.4606e-06	0.000297813
TPBG	ENSG00000146242.5	protein_coding	14248.8	0.477767	0.102966	4.64002	3.48369e-06	0.000297878
HIST1H2BD	ENSG00000158373.7	protein_coding	2156.11	-0.477915	0.103552	-4.61519	3.92728e-06	0.000333669
MRPL37	ENSG00000116221.11	protein_coding	1671.69	-0.481261	0.104331	-4.61281	3.97253e-06	0.000335377
STC1	ENSG00000159167.7	protein_coding	42362.8	0.433499	0.0941384	4.60491	4.12645e-06	0.00034618
GPR125	ENSG00000152990.9	protein_coding	3459.85	0.449334	0.097759	4.59635	4.29963e-06	0.000358455
TROAP	ENSG00000135451.8	protein_coding	134.985	0.757113	0.165012	4.58823	4.47022e-06	0.000370362
KIAA1199	ENSG00000103888.11	protein_coding	2122.99	-0.514185	0.11227	-4.57989	4.65227e-06	0.000380715
SRPR	ENSG00000182934.7	protein_coding	6329.08	0.483999	0.105661	4.58067	4.63492e-06	0.000380715
CST2	ENSG00000170369.3	protein_coding	4550.91	-0.491129	0.107357	-4.57472	4.7685e-06	0.000387848
NNMT	ENSG00000166741.3	protein_coding	1422.9	-0.525777	0.115017	-4.57132	4.84669e-06	0.000391818
FILIP1L	ENSG00000168386.14	protein_coding	352.384	0.677337	0.1484	4.56427	5.01235e-06	0.00040277
CDC27	ENSG00000004897.7	protein_coding	3721.26	-0.475015	0.104131	-4.56171	5.07386e-06	0.000405271
WDR82	ENSG00000164091.7	protein_coding	6927.73	0.417296	0.0915412	4.55856	5.1506e-06	0.000407576
TDP1	ENSG00000042088.9	protein_coding	1328.78	0.496417	0.108912	4.55797	5.16495e-06	0.000407576
PLK1	ENSG00000166851.10	protein_coding	363.342	0.629141	0.138067	4.55678	5.19438e-06	0.000407576
KIF15	ENSG00000163808.12	protein_coding	131.78	0.751851	0.165115	4.5535	5.27614e-06	0.00041157
CCT5	ENSG00000150753.7	protein_coding	6780.34	0.443694	0.0977793	4.53771	5.68687e-06	0.000438481
SGK1	ENSG00000118515.7	protein_coding	1671.54	0.493664	0.108789	4.53779	5.6846e-06	0.000438481
PLK4	ENSG00000142731.6	protein_coding	183.539	0.724464	0.159876	4.53142	5.85877e-06	0.000449138
IL1A	ENSG00000115008.5	protein_coding	694.881	0.547057	0.120797	4.52873	5.9339e-06	0.000452299
NFIL3	ENSG00000165030.3	protein_coding	3028.68	0.574546	0.126945	4.52594	6.01266e-06	0.000453278
KIAA0101	ENSG00000166803.6	protein_coding	127.422	0.76235	0.168443	4.52587	6.01471e-06	0.000453278
MCM4	ENSG00000104738.12	protein_coding	1261.15	0.500712	0.110751	4.52107	6.15279e-06	0.000458503
TCN1	ENSG00000134827.3	protein_coding	223.73	0.700927	0.155009	4.52185	6.13003e-06	0.000458503
KLF4	ENSG00000136826.10	protein_coding	4699.62	0.424342	0.0939861	4.51494	6.33349e-06	0.000469347
KIAA1191	ENSG00000122203.10	protein_coding	5889.74	-0.473743	0.105448	-4.49266	7.03389e-06	0.000518371
RNF145	ENSG00000145860.7	protein_coding	3255.18	0.445496	0.0993346	4.4848	7.29807e-06	0.000534885
DCTN3	ENSG00000137100.11	protein_coding	998.157	-0.515682	0.115185	-4.47699	7.5703e-06	0.000551423
RPL15	ENSG00000174748.14	protein_coding	23085.3	-0.421327	0.0941553	-4.47482	7.64774e-06	0.000551423
IRS2	ENSG00000185950.7	protein_coding	2596.8	0.477818	0.10677	4.47523	7.6329e-06	0.000551423
SLC16A6	ENSG00000108932.7	protein_coding	152.033	-0.726665	0.162676	-4.46695	7.93417e-06	0.000565957
C1R	ENSG00000159403.11	protein_coding	872.053	-0.523887	0.117256	-4.46788	7.89983e-06	0.000565957
NCAPG	ENSG00000109805.5	protein_coding	303.503	0.66959	0.150055	4.4623	8.1086e-06	0.000575322
DPYSL3	ENSG00000113657.8	protein_coding	897.452	0.510789	0.114768	4.45064	8.5616e-06	0.000604249
TBXAS1	ENSG00000059377.11	protein_coding	2308.73	0.492735	0.110759	4.44873	8.63792e-06	0.000606428
LONP2	ENSG00000102910.9	protein_coding	1538.81	0.468092	0.105395	4.44132	8.94107e-06	0.000624424
H6PD	ENSG00000049239.8	protein_coding	16839.9	-0.434043	0.0978745	-4.43469	9.22065e-06	0.000640595
MYC	ENSG00000136997.10	protein_coding	4247.15	0.485084	0.109563	4.42746	9.53489e-06	0.000658994
SART3	ENSG00000075856.7	protein_coding	2825.49	0.43305	0.097905	4.42316	9.72663e-06	0.000668781
SGCE	ENSG00000127990.11	protein_coding	1281.77	-0.480665	0.10888	-4.41462	1.01186e-05	0.000692166
TINAGL1	ENSG00000142910.11	protein_coding	1082.9	0.542143	0.123036	4.40638	1.05113e-05	0.000715356
PSAT1	ENSG00000135069.9	protein_coding	852.638	0.535515	0.121661	4.4017	1.07405e-05	0.000723574
NUSAP1	ENSG00000137804.8	protein_coding	410.761	0.630017	0.143116	4.40214	1.07189e-05	0.000723574
MOAP1	ENSG00000165943.4	protein_coding	1915.26	-0.451738	0.102686	-4.39921	1.08646e-05	0.000728254
ID1	ENSG00000125968.7	protein_coding	2871.64	-0.484008	0.110666	-4.37361	1.2221e-05	0.000815081
PNMA2	ENSG00000240694.4	protein_coding	1135.8	-0.519255	0.118807	-4.37057	1.23922e-05	0.000822387
ST13	ENSG00000100380.8	protein_coding	4111.25	0.43007	0.0985107	4.36572	1.26706e-05	0.0008367
CSRNP1	ENSG00000144655.10	protein_coding	1741.88	0.524325	0.120428	4.35384	1.33773e-05	0.000879016
QSER1	ENSG00000060749.10	protein_coding	1165.77	-0.485793	0.111645	-4.35124	1.35367e-05	0.000885128
DUSP1	ENSG00000120129.5	protein_coding	4930.61	0.524244	0.120537	4.34923	1.36618e-05	0.00088895
ALDH3A1	ENSG00000108602.13	protein_coding	103.456	-0.726143	0.167599	-4.33261	1.4735e-05	0.000954125
POLR3GL	ENSG00000121851.8	protein_coding	1124.44	-0.479219	0.11064	-4.33133	1.48209e-05	0.000955051
NCAPG2	ENSG00000146918.15	protein_coding	646.913	0.553224	0.12789	4.32577	1.52003e-05	0.000974793
ETS2	ENSG00000157557.7	protein_coding	919.438	0.531799	0.123129	4.31905	1.56705e-05	0.00100014
SKA3	ENSG00000165480.11	protein_coding	92.4724	0.726484	0.168433	4.31319	1.60919e-05	0.00102214
VAT1	ENSG00000108828.11	protein_coding	19561.7	0.447667	0.103885	4.30924	1.63819e-05	0.00103563
SLC37A2	ENSG00000134955.7	protein_coding	5876.48	-0.434215	0.10084	-4.30596	1.66264e-05	0.00104613
FIBP	ENSG00000172500.8	protein_coding	2498.37	-0.438257	0.101835	-4.30358	1.68061e-05	0.00104755
TPM3	ENSG00000143549.15	protein_coding	14563.1	0.465094	0.108048	4.30453	1.67342e-05	0.00104755
SMS	ENSG00000102172.11	protein_coding	4556.86	0.475419	0.110628	4.29747	1.72757e-05	0.00106961
SLC1A1	ENSG00000106688.7	protein_coding	338.721	0.607431	0.141365	4.2969	1.73203e-05	0.00106961
CKS2	ENSG00000123975.4	protein_coding	1185.47	0.532269	0.123982	4.2931	1.76194e-05	0.00108307
GRK5	ENSG00000198873.10	protein_coding	1649.47	0.4598	0.107184	4.28983	1.7881e-05	0.0010941
CHAF1A	ENSG00000167670.11	protein_coding	410.061	0.59503	0.13905	4.27926	1.8752e-05	0.00114216
TPM4	ENSG00000167460.10	protein_coding	36798.5	0.379298	0.0887544	4.27356	1.92373e-05	0.00116489
BACE2	ENSG00000182240.11	protein_coding	3020.88	0.486138	0.113774	4.27284	1.92998e-05	0.00116489
KLF6	ENSG00000067082.10	protein_coding	12367.2	0.417478	0.0977595	4.27046	1.95073e-05	0.00117211
ADIPOR2	ENSG00000006831.9	protein_coding	3167.99	-0.437894	0.10281	-4.25925	2.05116e-05	0.00122693
OPHN1	ENSG00000079482.11	protein_coding	2412.15	0.421454	0.0991619	4.25016	2.13615e-05	0.00127206
APOBEC3B	ENSG00000179750.11	protein_coding	62.6172	0.713246	0.168016	4.2451	2.185e-05	0.00129537
ZBTB18	ENSG00000179456.9	protein_coding	873.852	-0.489967	0.115574	-4.23944	2.24081e-05	0.00131097
ITGA1	ENSG00000213949.4	protein_coding	11484.8	-0.420123	0.0990812	-4.24018	2.23337e-05	0.00131097
PBK	ENSG00000168078.5	protein_coding	196.411	0.690047	0.162703	4.24115	2.22378e-05	0.00131097
NDC80	ENSG00000080986.8	protein_coding	195.865	0.679671	0.16036	4.2384	2.25118e-05	0.00131129
ARG2	ENSG00000081181.3	protein_coding	473.563	0.553206	0.130579	4.23656	2.26969e-05	0.00131632
IGIP	ENSG00000182700.3	protein_coding	382.073	-0.581474	0.13761	-4.22551	2.38404e-05	0.00137666
MCM2	ENSG00000073111.9	protein_coding	676.044	0.516613	0.122435	4.21949	2.44857e-05	0.00140782
RACGAP1	ENSG00000161800.8	protein_coding	553.566	0.567222	0.134464	4.21838	2.4606e-05	0.00140867
SYPL1	ENSG00000008282.3	protein_coding	2190.65	0.466956	0.110998	4.20687	2.58926e-05	0.00147599
RBBP5	ENSG00000117222.9	protein_coding	840.733	0.501762	0.119391	4.20269	2.6376e-05	0.00149715
BCL7A	ENSG00000110987.4	protein_coding	694.052	0.518246	0.123456	4.19781	2.69506e-05	0.00152328
CAP1	ENSG00000131236.12	protein_coding	24616.8	0.373872	0.0892002	4.19138	2.77263e-05	0.00156051
HNRNPAB	ENSG00000197451.6	protein_coding	3431.99	0.403035	0.0962674	4.18662	2.83139e-05	0.00158689
TSPYL2	ENSG00000184205.10	protein_coding	862.651	-0.501332	0.119827	-4.18382	2.86652e-05	0.00159791
STX3	ENSG00000166900.10	protein_coding	2473.56	0.422933	0.101104	4.18315	2.87501e-05	0.00159791
SYT17	ENSG00000103528.12	protein_coding	394.511	-0.58839	0.140859	-4.17714	2.95197e-05	0.00162043
RRM1	ENSG00000167325.10	protein_coding	940.361	0.526126	0.125918	4.17833	2.93663e-05	0.00162043
DIAPH3	ENSG00000139734.13	protein_coding	153.475	0.685581	0.164116	4.17741	2.94844e-05	0.00162043
AK4	ENSG00000162433.10	protein_coding	4555.56	-0.407648	0.0980394	-4.158	3.21052e-05	0.00175513
GIPC1	ENSG00000123159.11	protein_coding	5856.33	0.425561	0.102461	4.1534	3.27568e-05	0.00178344
LIFR	ENSG00000113594.5	protein_coding	2710.81	-0.433339	0.104659	-4.14048	3.46583e-05	0.0018793
SLC7A5	ENSG00000103257.4	protein_coding	4805.31	0.428196	0.10347	4.13836	3.49792e-05	0.00188902
CCND1	ENSG00000110092.3	protein_coding	18854.5	0.388486	0.0939995	4.13285	3.58286e-05	0.00192709
UHRF1	ENSG00000034063.9	processed_transcript	605.928	0.512081	0.124213	4.12261	3.74609e-05	0.00200679
CST4	ENSG00000101441.4	protein_coding	37255.9	-0.385253	0.0934896	-4.12082	3.77534e-05	0.00201437
COL4A2	ENSG00000134871.13	protein_coding	5194.37	0.454817	0.110407	4.11947	3.79753e-05	0.00201814
TOMM34	ENSG00000025772.7	protein_coding	7671.07	0.438403	0.106454	4.11826	3.8175e-05	0.0020207
KPNA2	ENSG00000182481.4	protein_coding	2491.3	0.475209	0.115604	4.11065	3.9455e-05	0.0020802
NEDD9	ENSG00000111859.12	protein_coding	344.996	0.573157	0.139498	4.10871	3.97875e-05	0.00208947
CHST3	ENSG00000122863.5	protein_coding	3020.87	-0.422455	0.103124	-4.09658	4.19306e-05	0.00219338
LBP	ENSG00000129988.5	protein_coding	348.736	-0.609863	0.14896	-4.09414	4.23734e-05	0.00220788
MXD1	ENSG00000059728.6	protein_coding	1109.79	0.462944	0.113235	4.08835	4.3446e-05	0.00225497
POU3F2	ENSG00000184486.7	protein_coding	157.78	0.672154	0.164611	4.0833	4.44009e-05	0.00229559
TAGLN3	ENSG00000144834.8	protein_coding	78.2606	0.68865	0.168722	4.08156	4.47338e-05	0.00230388
SEC31A	ENSG00000138674.12	protein_coding	9013.26	0.370728	0.0909542	4.07599	4.58189e-05	0.00234168
NCAPD3	ENSG00000151503.8	protein_coding	886.63	0.480491	0.117866	4.07658	4.57028e-05	0.00234168
CASC4	ENSG00000166734.14	protein_coding	1245.55	-0.476667	0.116974	-4.075	4.60144e-05	0.0023423
RAB3B	ENSG00000169213.6	protein_coding	518.703	0.587902	0.1443	4.07415	4.61822e-05	0.0023423
NLRC5	ENSG00000140853.11	protein_coding	1289.89	-0.462417	0.113594	-4.07078	4.68555e-05	0.00236744
SLC16A2	ENSG00000147100.5	protein_coding	345.076	-0.566066	0.139528	-4.057	4.97064e-05	0.00250201
AP001007.1	ENSG00000203306.3	pseudogene	2599.3	-0.410525	0.101398	-4.04867	5.15099e-05	0.00258305
IPO11	ENSG00000086200.12	protein_coding	673.768	-0.526786	0.130193	-4.04618	5.20605e-05	0.00260028
MICA	ENSG00000204520.8	protein_coding	2656.98	0.414999	0.102586	4.04536	5.22433e-05	0.00260028
WHSC1	ENSG00000109685.13	protein_coding	5912.04	0.386324	0.0956207	4.04017	5.34127e-05	0.00264859
BRWD3	ENSG00000165288.10	protein_coding	2065.84	-0.425584	0.105417	-4.03716	5.41013e-05	0.00267281
GNPTAB	ENSG00000111670.10	protein_coding	949.346	-0.489045	0.121225	-4.03419	5.47915e-05	0.00269691
MALAT1	ENSG00000251562.3	lincRNA	12920.5	-0.487492	0.120941	-4.03084	5.55788e-05	0.00271562
SESN2	ENSG00000130766.4	protein_coding	687.707	0.493062	0.12231	4.03123	5.54848e-05	0.00271562
EIF4EBP1	ENSG00000187840.4	protein_coding	1435.46	0.462826	0.114891	4.0284	5.61581e-05	0.00273392
TTL	ENSG00000114999.7	protein_coding	1942.93	0.421467	0.104925	4.01685	5.89804e-05	0.00286087
SAA1	ENSG00000173432.6	protein_coding	514.295	-0.533721	0.132974	-4.01372	5.97686e-05	0.0028886
SON	ENSG00000159140.13	protein_coding	7253.58	0.397989	0.0992072	4.0117	6.02829e-05	0.00289249
ARSB	ENSG00000113273.11	protein_coding	1326.91	0.450903	0.112386	4.01209	6.01842e-05	0.00289249
OSTM1	ENSG00000081087.10	protein_coding	1207.26	-0.500506	0.124847	-4.00894	6.09907e-05	0.00291597
DCLRE1B	ENSG00000118655.4	protein_coding	349.057	0.560435	0.139851	4.00738	6.13964e-05	0.00292488
ITPRIP	ENSG00000148841.11	protein_coding	2631.64	0.40003	0.0999534	4.00216	6.27657e-05	0.00297947
PBX3	ENSG00000167081.12	protein_coding	520.596	0.514556	0.128706	3.99793	6.38978e-05	0.00302246
LPCAT1	ENSG00000153395.5	protein_coding	5736.47	-0.370166	0.0926901	-3.99359	6.50804e-05	0.00306752
HK2	ENSG00000159399.5	protein_coding	16911.5	0.418514	0.104879	3.99043	6.59524e-05	0.00309767
DICER1	ENSG00000100697.10	protein_coding	1824.55	-0.457106	0.114628	-3.98776	6.67015e-05	0.00312186
PATL1	ENSG00000166889.13	protein_coding	4977.88	0.404734	0.101665	3.98105	6.86111e-05	0.00320001
UROS	ENSG00000188690.8	protein_coding	1381.34	-0.433006	0.10884	-3.97837	6.93892e-05	0.00322503
IL6ST	ENSG00000134352.15	protein_coding	8709.28	-0.427234	0.107413	-3.97749	6.96452e-05	0.00322569
ATP6V1D	ENSG00000100554.7	protein_coding	3005.05	0.43582	0.109628	3.97544	7.02506e-05	0.00324247
SLC2A3	ENSG00000059804.11	protein_coding	20897.4	0.445117	0.112038	3.97291	7.09985e-05	0.00326569
PIM1	ENSG00000137193.9	protein_coding	1643.72	0.521774	0.13161	3.96455	7.35354e-05	0.00337075
TM4SF1	ENSG00000169908.6	protein_coding	10910.3	0.39134	0.0989005	3.9569	7.59273e-05	0.00346847
TNFRSF1B	ENSG00000028137.12	protein_coding	1745.98	-0.497742	0.125944	-3.95208	7.74751e-05	0.0035058
FXYD5	ENSG00000089327.10	protein_coding	4371.22	0.433894	0.109753	3.95338	7.7054e-05	0.0035058
LPXN	ENSG00000110031.8	protein_coding	1477.83	0.454513	0.115011	3.9519	7.75329e-05	0.0035058
FBXO11	ENSG00000138081.15	protein_coding	973.946	-0.458046	0.116085	-3.94578	7.95394e-05	0.00358438
GALNT7	ENSG00000109586.7	protein_coding	1656.78	-0.470398	0.119538	-3.93513	8.31525e-05	0.00373458
PRSS3P2	ENSG00000250606.4	pseudogene	735.38	0.518591	0.13194	3.93051	8.47652e-05	0.00378721
NEK2	ENSG00000117650.8	protein_coding	159.51	0.636341	0.161912	3.93015	8.48922e-05	0.00378721
CDR2L	ENSG00000109089.7	protein_coding	1891.08	0.437193	0.111328	3.92706	8.5989e-05	0.00382336
TES	ENSG00000135269.13	protein_coding	2060.89	0.441585	0.112623	3.92089	8.82208e-05	0.00390956
CDCA3	ENSG00000111665.7	protein_coding	139.071	0.641265	0.163713	3.91699	8.96597e-05	0.00396017
CD9	ENSG00000010278.7	protein_coding	11022.1	-0.440866	0.112625	-3.91446	9.06081e-05	0.00398885
AGPAT9	ENSG00000138678.6	protein_coding	3826.08	0.437513	0.111809	3.91304	9.11426e-05	0.00399918
CDV3	ENSG00000091527.11	protein_coding	4068.54	0.38435	0.098256	3.91172	9.16403e-05	0.00400784
CDC45	ENSG00000093009.5	protein_coding	122.861	0.65337	0.167278	3.90589	9.38781e-05	0.00409229
ALG12	ENSG00000182858.9	protein_coding	265.148	-0.574501	0.147163	-3.90385	9.46753e-05	0.0041136
SEMA7A	ENSG00000138623.5	protein_coding	2666.15	0.429982	0.110741	3.88279	0.000103266	0.0044723
KIF20B	ENSG00000138182.10	protein_coding	421.727	0.586763	0.151186	3.88106	0.000104003	0.00448963
GGA2	ENSG00000103365.11	protein_coding	3027.92	-0.383842	0.0989563	-3.8789	0.000104929	0.004515
ERRFI1	ENSG00000116285.8	protein_coding	129293	0.377013	0.0974655	3.86817	0.000109657	0.00470327
PFKFB3	ENSG00000170525.14	protein_coding	14536.5	0.39792	0.103073	3.86057	0.000113123	0.00483638
EXT2	ENSG00000151348.9	protein_coding	4558.69	0.381685	0.0989231	3.8584	0.00011413	0.00486382
RPL7L1	ENSG00000146223.10	protein_coding	13732.2	0.358654	0.0930051	3.85629	0.000115122	0.0048905
ISG15	ENSG00000187608.5	protein_coding	1640.57	0.407943	0.106076	3.84575	0.000120183	0.00508929
DMXL2	ENSG00000104093.9	protein_coding	658.289	-0.488402	0.127373	-3.83444	0.000125853	0.0053125
ERLIN1	ENSG00000107566.9	protein_coding	1717.19	0.40506	0.10572	3.83144	0.000127396	0.00536069
ABL2	ENSG00000143322.15	protein_coding	2882.13	0.380254	0.0993449	3.82762	0.00012939	0.00539354
DIAPH1	ENSG00000131504.11	protein_coding	6537	0.387735	0.101276	3.82849	0.000128933	0.00539354
PRUNE	ENSG00000143363.11	protein_coding	1236.56	0.418754	0.109386	3.82823	0.000129071	0.00539354
NRP1	ENSG00000099250.13	protein_coding	19203.4	-0.36088	0.0943027	-3.82683	0.000129805	0.00539397
ATP1B3	ENSG00000069849.6	protein_coding	2915.17	0.373954	0.0979685	3.81708	0.000135041	0.00559413
HS2ST1	ENSG00000153936.12	protein_coding	1287.94	-0.464518	0.121772	-3.81464	0.00013638	0.00560706
RPLP0	ENSG00000089157.11	protein_coding	62767.5	0.398605	0.104466	3.81565	0.000135827	0.00560706
MCM6	ENSG00000076003.4	protein_coding	289.948	0.561994	0.147342	3.81422	0.000136614	0.00560706
FBLIM1	ENSG00000162458.8	protein_coding	1214.91	0.425639	0.111707	3.81033	0.000138781	0.00567851
UBFD1	ENSG00000103353.11	protein_coding	1953.75	-0.395906	0.104116	-3.80255	0.000143215	0.00584202
HTR7	ENSG00000148680.11	protein_coding	714.489	0.469132	0.123399	3.80175	0.000143675	0.00584295
CPNE3	ENSG00000085719.7	protein_coding	2942.56	-0.392707	0.103527	-3.79327	0.000148678	0.00602802
LINC00672	ENSG00000263874.1	lincRNA	63.0041	-0.634444	0.167459	-3.78866	0.000151462	0.00608628
UBE3C	ENSG00000009335.13	protein_coding	3898.87	-0.360809	0.0952537	-3.78788	0.00015194	0.00608628
EMP1	ENSG00000134531.5	protein_coding	21555.2	0.348381	0.0919412	3.78917	0.000151151	0.00608628
FZD4	ENSG00000174804.3	protein_coding	720.551	0.453517	0.119717	3.78823	0.000151722	0.00608628
SELPLG	ENSG00000110876.8	protein_coding	490.55	-0.502391	0.132697	-3.786	0.000153091	0.00609576
CNTNAP1	ENSG00000108797.7	protein_coding	2437.13	-0.404735	0.106889	-3.78651	0.00015278	0.00609576
SLC37A3	ENSG00000157800.13	protein_coding	1718.76	0.391562	0.103582	3.78023	0.000156686	0.00622036
CDK6	ENSG00000105810.5	protein_coding	1797.9	0.389993	0.103297	3.77544	0.000159723	0.00632207
UBA7	ENSG00000182179.6	protein_coding	1062.83	-0.423475	0.112254	-3.77247	0.000161639	0.00637899
TP53INP2	ENSG00000078804.8	protein_coding	2696.75	0.402526	0.106787	3.76943	0.000163621	0.00643817
NUDC	ENSG00000090273.9	protein_coding	4178.58	0.379469	0.100755	3.76627	0.000165706	0.00650105
LRP2BP	ENSG00000109771.11	protein_coding	536.737	-0.479384	0.127586	-3.75735	0.000171722	0.00671731
STMN3	ENSG00000197457.5	protein_coding	1467.58	-0.420818	0.112167	-3.75171	0.000175631	0.00684016
CKS1B	ENSG00000173207.8	protein_coding	1471.58	0.406528	0.108369	3.75135	0.000175888	0.00684016
EGLN3	ENSG00000129521.9	protein_coding	8902.11	0.437674	0.116971	3.74172	0.000182764	0.00708688
FMOD	ENSG00000122176.10	protein_coding	972.901	-0.437569	0.116973	-3.74077	0.000183461	0.00709329
ABCA1	ENSG00000165029.11	protein_coding	1262.78	-0.474327	0.127027	-3.73406	0.000188416	0.00725696
ABCF1	ENSG00000204574.8	protein_coding	6450.71	0.350546	0.0939232	3.73226	0.00018977	0.00725696
SCD5	ENSG00000145284.7	protein_coding	1588.71	0.397946	0.106625	3.73221	0.000189806	0.00725696
STARD8	ENSG00000130052.9	protein_coding	699.888	0.50074	0.13417	3.73213	0.00018987	0.00725696
PKMYT1	ENSG00000127564.12	protein_coding	74.8902	0.629025	0.168862	3.72509	0.000195246	0.00744111
BIRC5	ENSG00000089685.10	protein_coding	130.944	0.615603	0.166158	3.70492	0.000211456	0.00803592
DDI2	ENSG00000197312.7	protein_coding	525.882	-0.497451	0.134447	-3.69998	0.000215613	0.00815551
RARS	ENSG00000113643.4	protein_coding	2218.41	-0.393552	0.106373	-3.69973	0.000215825	0.00815551
TMEM171	ENSG00000157111.8	protein_coding	433.14	0.499475	0.135168	3.69521	0.000219703	0.00827859
RAB18	ENSG00000099246.12	protein_coding	2129.36	-0.396724	0.107579	-3.68773	0.000226265	0.00847796
TIMP3	ENSG00000100234.11	protein_coding	24473.4	-0.336809	0.0913276	-3.68792	0.000226097	0.00847796
FKTN	ENSG00000106692.9	protein_coding	336.858	-0.522258	0.141823	-3.68245	0.000230999	0.00863107
OSBPL10	ENSG00000144645.9	protein_coding	6252.8	0.34705	0.0942884	3.68073	0.000232564	0.00866529
CCRN4L	ENSG00000151014.4	protein_coding	340.363	0.533754	0.145401	3.67092	0.00024168	0.00897986
SEMA4D	ENSG00000187764.7	protein_coding	1806.42	-0.385058	0.10502	-3.66653	0.000245865	0.00906585
TNFSF15	ENSG00000181634.7	protein_coding	7657.58	0.387406	0.105665	3.66635	0.000246033	0.00906585
ORC1	ENSG00000085840.8	protein_coding	117.825	0.60865	0.165974	3.66714	0.000245277	0.00906585
OTUD1	ENSG00000165312.5	protein_coding	2988.49	0.358452	0.0977936	3.66539	0.000246962	0.00906807
ZHX2	ENSG00000178764.6	protein_coding	1219.11	0.408687	0.111514	3.66488	0.000247453	0.00906807
DHRS7	ENSG00000100612.9	protein_coding	1094.02	0.410972	0.112179	3.66354	0.000248754	0.00909077
TRIM23	ENSG00000113595.10	protein_coding	883.026	-0.46878	0.128081	-3.66004	0.000252179	0.00919076
MTHFR	ENSG00000177000.6	protein_coding	1843.07	-0.405055	0.110981	-3.64978	0.000262461	0.00953941
CENPE	ENSG00000138778.7	protein_coding	337.21	0.561063	0.153893	3.6458	0.000266563	0.00966217
WDR18	ENSG00000065268.6	protein_coding	1002.16	0.430497	0.118182	3.64265	0.000269845	0.00975462
HDAC9	ENSG00000048052.17	protein_coding	686.201	0.464575	0.12759	3.64116	0.000271408	0.00978464
TMPO	ENSG00000120802.9	protein_coding	2984.83	0.382878	0.105366	3.63379	0.000279291	0.0100417
ARPC2	ENSG00000163466.11	protein_coding	10391	0.329696	0.0908219	3.63014	0.000283273	0.0101575
KIAA1211	ENSG00000109265.8	protein_coding	337.315	0.54369	0.149875	3.62762	0.000286048	0.0102295
BPNT1	ENSG00000162813.13	protein_coding	1677.18	0.386505	0.106739	3.62103	0.000293438	0.0104657
MOV10	ENSG00000155363.14	protein_coding	1593.93	-0.378238	0.104479	-3.62025	0.000294321	0.0104692
OXSR1	ENSG00000172939.4	protein_coding	5261.16	0.33718	0.0931904	3.61818	0.000296677	0.0104693
ADAM19	ENSG00000135074.11	protein_coding	10519.5	0.364642	0.100749	3.6193	0.000295403	0.0104693
SMARCA4	ENSG00000127616.13	protein_coding	8459.38	0.370378	0.102354	3.61858	0.000296223	0.0104693
CD164	ENSG00000135535.10	protein_coding	6218.61	-0.390961	0.108159	-3.61469	0.000300702	0.0105828
WSB2	ENSG00000176871.4	protein_coding	5114.88	0.372815	0.103158	3.61402	0.000301481	0.0105828
SH3RF1	ENSG00000154447.10	protein_coding	979.242	0.411569	0.114125	3.60629	0.000310602	0.0108743
LIPH	ENSG00000163898.5	protein_coding	967.323	0.407665	0.11352	3.59113	0.000329249	0.011497
OASL	ENSG00000135114.8	protein_coding	478.341	0.47031	0.130992	3.59037	0.000330211	0.0115005
VCL	ENSG00000035403.12	protein_coding	11030.4	0.328075	0.0915103	3.58512	0.000336925	0.0117038
FOXO3	ENSG00000118689.10	protein_coding	2611.11	0.353926	0.0988053	3.58205	0.000340903	0.0118112
GLTP	ENSG00000139433.5	protein_coding	5210.6	0.424829	0.118669	3.57995	0.000343658	0.0118758
CPA4	ENSG00000128510.6	protein_coding	248.297	-0.537244	0.150126	-3.57862	0.000345409	0.0119055
ATP8B1	ENSG00000081923.6	protein_coding	222.153	-0.557515	0.155983	-3.57421	0.000351288	0.0120458
DPY19L4	ENSG00000156162.12	protein_coding	1246.73	-0.452102	0.126469	-3.57479	0.000350505	0.0120458
CENPW	ENSG00000203760.4	protein_coding	84.6679	0.603038	0.168861	3.57121	0.000355332	0.0121533
MAN2A1	ENSG00000112893.5	protein_coding	4494.64	-0.370627	0.103822	-3.56981	0.000357233	0.0121758
IER3	ENSG00000137331.11	protein_coding	39714	0.323733	0.0906972	3.56939	0.000357817	0.0121758
SORL1	ENSG00000137642.8	protein_coding	930.018	-0.45798	0.128474	-3.56477	0.000364176	0.0123607
FAM222B	ENSG00000173065.9	protein_coding	1462.86	0.391485	0.110047	3.55744	0.000374485	0.0126783
RGCC	ENSG00000102760.12	protein_coding	988.277	0.46329	0.130288	3.55588	0.000376709	0.0127213
ZNF697	ENSG00000143067.4	protein_coding	1388.43	0.390083	0.109728	3.55499	0.000377993	0.0127324
PSMB8	ENSG00000204264.4	protein_coding	1893.75	-0.366559	0.103168	-3.55303	0.000380825	0.0127955
IFITM10	ENSG00000244242.1	protein_coding	550.567	-0.488702	0.137643	-3.5505	0.000384494	0.0128863
GPT2	ENSG00000166123.9	protein_coding	1651.75	0.406789	0.114622	3.54896	0.000386755	0.0129296
BNIP2	ENSG00000140299.7	protein_coding	1743.41	-0.400633	0.113037	-3.54426	0.000393722	0.0130969
ARMCX1	ENSG00000126947.7	protein_coding	1498.43	-0.376047	0.106099	-3.54431	0.000393649	0.0130969
PLOD1	ENSG00000083444.12	protein_coding	31153.1	0.374831	0.105858	3.54089	0.000398782	0.0132322
TWF1	ENSG00000151239.9	protein_coding	3911.84	-0.414076	0.117049	-3.53762	0.00040375	0.0132589
ANP32E	ENSG00000143401.10	protein_coding	1410.79	-0.402866	0.113867	-3.53805	0.000403095	0.0132589
DAZAP2	ENSG00000183283.11	protein_coding	6117.73	0.327727	0.0925944	3.53938	0.000401073	0.0132589
CAV2	ENSG00000105971.10	protein_coding	1804.6	0.392562	0.110981	3.53721	0.000404375	0.0132589
CYR61	ENSG00000142871.11	protein_coding	4946.91	0.423653	0.119774	3.53709	0.000404556	0.0132589
PSMD11	ENSG00000108671.5	protein_coding	3482.17	0.356509	0.101317	3.51873	0.000433612	0.0141764
HLA-B	ENSG00000234745.5	protein_coding	24364.4	-0.319431	0.0908401	-3.51642	0.000437416	0.0142528
GEM	ENSG00000164949.3	protein_coding	1181.37	0.393463	0.111906	3.51601	0.000438086	0.0142528
FAT4	ENSG00000196159.7	protein_coding	821.082	-0.435948	0.12427	-3.50808	0.000451349	0.0146485
GTSE1	ENSG00000075218.14	protein_coding	580.19	0.47617	0.136076	3.4993	0.000466475	0.0151027
CTPS1	ENSG00000171793.9	protein_coding	903.422	0.405528	0.116027	3.49512	0.000473843	0.0153041
CALB2	ENSG00000172137.14	protein_coding	2717.23	-0.377746	0.108112	-3.49402	0.000475808	0.0153279
EEF1A1	ENSG00000156508.13	protein_coding	340482	0.305154	0.087351	3.49342	0.000476878	0.0153279
KIF22	ENSG00000079616.8	protein_coding	847.515	0.412532	0.118195	3.49027	0.000482532	0.0154723
CHCHD3	ENSG00000106554.7	protein_coding	1316.1	0.400452	0.114877	3.48593	0.000490427	0.0156502
DPH2	ENSG00000132768.9	protein_coding	886.082	0.402231	0.115381	3.48612	0.000490086	0.0156502
BDNF	ENSG00000176697.14	protein_coding	476.965	-0.460674	0.132196	-3.48477	0.000492553	0.0156806
HEG1	ENSG00000173706.8	protein_coding	4311.2	0.351775	0.100985	3.48345	0.00049499	0.0157207
CHN1	ENSG00000128656.9	protein_coding	258.948	0.546262	0.156848	3.48276	0.00049628	0.0157242
DCTN5	ENSG00000166847.5	protein_coding	3200.5	0.338484	0.0972837	3.47935	0.000502634	0.0158877
ZNF385A	ENSG00000161642.13	protein_coding	301.051	-0.515123	0.148209	-3.47566	0.00050959	0.0160559
CHMP1B	ENSG00000255112.2	protein_coding	2414.67	0.34651	0.0997076	3.47526	0.000510361	0.0160559
MUC1	ENSG00000185499.12	protein_coding	654.346	-0.483682	0.139345	-3.47111	0.00051831	0.016197
PRDX1	ENSG00000117450.9	protein_coding	13113.4	0.338748	0.0975934	3.47102	0.000518487	0.016197
GBP3	ENSG00000117226.7	protein_coding	900.888	0.4128	0.118889	3.47215	0.0005163	0.016197
LRRC59	ENSG00000108829.9	protein_coding	4945.51	-0.351307	0.101394	-3.46477	0.00053069	0.0165387
MRPL17	ENSG00000158042.8	protein_coding	3585.02	0.376312	0.108646	3.46366	0.000532888	0.0165387
ANGPTL4	ENSG00000167772.7	protein_coding	5990.38	0.407816	0.117746	3.46352	0.000533148	0.0165387
TGOLN2	ENSG00000152291.9	protein_coding	11806.1	0.313981	0.0906902	3.46213	0.000535915	0.0165503
INCENP	ENSG00000149503.8	protein_coding	481.276	0.449344	0.12979	3.46209	0.000536003	0.0165503
CDC25B	ENSG00000101224.13	protein_coding	4876.89	-0.360562	0.104172	-3.46123	0.000537722	0.0165545
HSPB1	ENSG00000106211.8	protein_coding	2885.4	0.433554	0.125299	3.46016	0.000539862	0.0165545
TSPAN13	ENSG00000106537.7	protein_coding	466.364	0.479712	0.138625	3.46051	0.000539151	0.0165545
CDK16	ENSG00000102225.11	protein_coding	2906.35	0.360591	0.104379	3.45463	0.000551045	0.0168587
CRADD	ENSG00000169372.8	protein_coding	908.935	0.420475	0.121824	3.45148	0.000557523	0.0170178
SREK1	ENSG00000153914.11	protein_coding	2576.94	-0.376771	0.10921	-3.44997	0.000560641	0.017074
PRKAR2A	ENSG00000114302.11	protein_coding	2748.76	0.339441	0.0984473	3.44795	0.000564865	0.0171634
CHTF18	ENSG00000127586.12	protein_coding	316.908	0.494668	0.143621	3.44427	0.000572597	0.0173371
DSCC1	ENSG00000136982.5	protein_coding	78.0798	0.581685	0.168898	3.444	0.000573179	0.0173371
NOLC1	ENSG00000166197.12	protein_coding	3459.37	0.341059	0.0991747	3.43897	0.000583926	0.0176222
CA14	ENSG00000118298.6	protein_coding	123.038	-0.568063	0.165341	-3.43571	0.000591008	0.0177792
TCEA3	ENSG00000204219.5	protein_coding	1800.4	-0.381805	0.111166	-3.43455	0.000593534	0.0177792
WBP1L	ENSG00000166272.12	protein_coding	2890.98	0.351991	0.102466	3.4352	0.000592118	0.0177792
SETD8	ENSG00000183955.8	protein_coding	1650.5	0.365019	0.10631	3.43352	0.000595794	0.0177792
CENPK	ENSG00000123219.8	protein_coding	139.823	0.573509	0.167004	3.4341	0.000594518	0.0177792
CDC42BPA	ENSG00000143776.14	protein_coding	5121.79	-0.384259	0.112033	-3.42986	0.000603894	0.0179738
HLA-DPB1	ENSG00000223865.6	protein_coding	1282.74	-0.372497	0.10862	-3.42936	0.00060501	0.0179738
ARL4C	ENSG00000188042.5	protein_coding	7823.25	0.316194	0.0922811	3.42642	0.000611602	0.0181293
SDPR	ENSG00000168497.4	protein_coding	511.68	-0.450632	0.131679	-3.4222	0.000621158	0.0183033
BUB3	ENSG00000154473.13	protein_coding	5478.77	0.335547	0.0980555	3.42201	0.000621592	0.0183033
KHDRBS3	ENSG00000131773.9	protein_coding	1609.2	0.365136	0.106674	3.42291	0.000619546	0.0183033
ANXA6	ENSG00000197043.9	protein_coding	17357.5	0.331269	0.0968337	3.42101	0.000623885	0.0183304
ATXN1	ENSG00000124788.13	protein_coding	3496.89	-0.337915	0.098871	-3.41773	0.000631448	0.0185118
SLC31A1	ENSG00000136868.9	protein_coding	1882.42	0.355975	0.104247	3.41471	0.000638504	0.0186776
NFE2L3	ENSG00000050344.8	protein_coding	4257.92	0.334027	0.0979062	3.41171	0.000645578	0.0187595
ENOPH1	ENSG00000145293.10	protein_coding	1239.77	0.38442	0.112696	3.41114	0.000646929	0.0187595
CASC5	ENSG00000137812.15	protein_coding	171.767	0.55617	0.162983	3.41243	0.000643854	0.0187595
SPC24	ENSG00000161888.7	protein_coding	91.1297	0.575517	0.168711	3.41126	0.000646633	0.0187595
PTPN14	ENSG00000152104.7	protein_coding	9363.85	0.350477	0.102824	3.40852	0.000653173	0.0188995
UBLCP1	ENSG00000164332.6	protein_coding	691.772	-0.445846	0.130904	-3.4059	0.000659457	0.0189989
MFHAS1	ENSG00000147324.6	protein_coding	742.998	0.410529	0.120518	3.40636	0.000658344	0.0189989
YBX1	ENSG00000065978.13	protein_coding	17897.7	0.314378	0.0924238	3.40148	0.000670223	0.0192654
KIAA2013	ENSG00000116685.11	protein_coding	4394.36	0.353366	0.103903	3.40092	0.000671594	0.0192654
MCMBP	ENSG00000197771.8	protein_coding	2653.72	0.339915	0.100006	3.39894	0.000676467	0.0193635
PRSS1	ENSG00000204983.8	protein_coding	619.413	0.428692	0.126162	3.39794	0.000678956	0.0193931
PCSK9	ENSG00000169174.9	protein_coding	11670.8	0.382278	0.112558	3.39627	0.000683115	0.0194702
MPRIP	ENSG00000133030.15	protein_coding	11158.4	0.338982	0.0998754	3.39405	0.000688666	0.0195866
PCNA	ENSG00000132646.6	protein_coding	1544.15	0.387852	0.114324	3.39257	0.000692402	0.019651
ATP8A2	ENSG00000132932.12	protein_coding	86.8574	-0.57236	0.168791	-3.39093	0.000696557	0.019722
INHBA	ENSG00000122641.9	protein_coding	265.135	0.519148	0.153122	3.39042	0.000697863	0.019722
MTHFD1	ENSG00000100714.11	protein_coding	1576.93	0.35563	0.104955	3.38839	0.000703038	0.0198263
TMSB4X	ENSG00000205542.6	protein_coding	104269	0.305162	0.0901355	3.3856	0.000710236	0.019987
HLA-DPA1	ENSG00000231389.3	protein_coding	3449.58	-0.335571	0.0992045	-3.38261	0.000717995	0.0201628
THBD	ENSG00000178726.6	protein_coding	6516.64	-0.333178	0.0985648	-3.3803	0.000724076	0.0202909
MAP3K7CL	ENSG00000156265.11	protein_coding	242.23	0.505614	0.149675	3.37808	0.000729947	0.0204125
GXYLT1	ENSG00000151233.6	protein_coding	240.005	-0.511485	0.151442	-3.37743	0.000731675	0.020418
SHMT2	ENSG00000182199.6	protein_coding	4160.54	0.338849	0.100377	3.37576	0.000736132	0.0204995
BID	ENSG00000015475.14	protein_coding	1556.2	-0.356154	0.105555	-3.37412	0.000740529	0.0205562
NOG	ENSG00000183691.4	protein_coding	2986	0.373487	0.110719	3.37328	0.000742791	0.0205562
TMEM97	ENSG00000109084.9	protein_coding	526.358	0.439658	0.130315	3.37382	0.000741326	0.0205562
EREG	ENSG00000124882.3	protein_coding	1657.03	0.356776	0.105839	3.37092	0.000749172	0.0206899
FBXW11	ENSG00000072803.13	protein_coding	3860.74	0.323467	0.0960095	3.36912	0.000754098	0.0207402
NCOA6	ENSG00000198646.9	protein_coding	3966.54	0.343361	0.101914	3.36911	0.000754103	0.0207402
BTBD9	ENSG00000183826.12	protein_coding	2708.55	0.336099	0.0998036	3.3676	0.000758251	0.0207833
TYRO3	ENSG00000092445.7	protein_coding	196.319	0.529592	0.15727	3.36741	0.000758788	0.0207833
SLC25A24	ENSG00000085491.11	protein_coding	2600.89	-0.379961	0.112991	-3.36277	0.000771657	0.02097
SPATS2L	ENSG00000196141.8	protein_coding	4981.27	0.313387	0.0931621	3.36388	0.000768538	0.02097
MRPL45	ENSG00000174100.5	protein_coding	1744.76	0.36084	0.107307	3.36268	0.000771891	0.02097
CCNJ	ENSG00000107443.11	protein_coding	408.904	0.457401	0.135989	3.36351	0.000769583	0.02097
EEF1A1P5	ENSG00000196205.7	pseudogene	3974.71	0.326247	0.0970726	3.36086	0.000777015	0.0210663
MUL1	ENSG00000090432.5	protein_coding	1484.39	0.364615	0.108644	3.35606	0.000790606	0.0213913
DLG3	ENSG00000082458.7	protein_coding	2125.87	0.339964	0.101332	3.35497	0.000793734	0.021409
CCNF	ENSG00000162063.8	protein_coding	239.164	0.50156	0.149509	3.35471	0.000794473	0.021409
NSUN2	ENSG00000037474.10	protein_coding	2169.95	0.347066	0.103525	3.35247	0.000800941	0.0215398
ELAVL1	ENSG00000066044.9	protein_coding	3816.07	0.325444	0.0971352	3.35042	0.000806891	0.0216562
CHIC2	ENSG00000109220.6	protein_coding	1384.57	0.357463	0.106743	3.34882	0.000811558	0.0216942
HS3ST1	ENSG00000002587.5	protein_coding	622.221	0.412503	0.123179	3.34882	0.000811562	0.0216942
FRMD5	ENSG00000171877.15	protein_coding	1355.11	0.363606	0.108608	3.34788	0.000814324	0.0217245
MAML3	ENSG00000196782.8	protein_coding	1720.4	0.369246	0.110375	3.34538	0.000821687	0.0218772
JARID2	ENSG00000008083.9	protein_coding	4984.38	0.327424	0.0979678	3.34216	0.000831283	0.0220886
VEGFC	ENSG00000150630.2	protein_coding	3675.49	0.357161	0.106906	3.34088	0.000835144	0.0221471
LZTFL1	ENSG00000163818.12	protein_coding	1191.3	-0.386214	0.115671	-3.3389	0.000841112	0.0221731
WDR37	ENSG00000047056.10	protein_coding	2152.26	0.336006	0.100619	3.33938	0.000839667	0.0221731
SLC12A6	ENSG00000140199.7	protein_coding	1018.4	0.385604	0.115488	3.3389	0.000841104	0.0221731
FANCI	ENSG00000140525.13	protein_coding	256.159	0.504326	0.151305	3.33317	0.000858615	0.0225899
AGL	ENSG00000162688.11	protein_coding	970.877	-0.402668	0.120886	-3.33097	0.000865436	0.0227245
DKFZP761J1410	ENSG00000105520.6	protein_coding	2222.61	-0.367774	0.110444	-3.32995	0.000868622	0.0227551
IQSEC2	ENSG00000124313.8	protein_coding	3446.31	-0.363205	0.109087	-3.3295	0.000870014	0.0227551
ARF4	ENSG00000168374.6	protein_coding	10375.8	0.340432	0.102308	3.32751	0.000876265	0.0228738
FASTKD5	ENSG00000215251.3	protein_coding	734.79	0.398265	0.119905	3.32149	0.00089537	0.0233268
CXCL2	ENSG00000081041.8	protein_coding	1073.8	0.440156	0.13269	3.31719	0.000909287	0.0236432
INPP5K	ENSG00000132376.15	protein_coding	1838.09	0.344319	0.103824	3.31637	0.00091194	0.0236661
MBOAT1	ENSG00000172197.9	protein_coding	188.773	0.517378	0.156049	3.31548	0.000914865	0.0236959
KLHL24	ENSG00000114796.11	protein_coding	2545.36	-0.364212	0.109924	-3.3133	0.000922032	0.0238352
CFB	ENSG00000243649.4	protein_coding	538.71	-0.439924	0.132855	-3.31132	0.00092857	0.0239116
TFG	ENSG00000114354.8	protein_coding	5993.56	0.310594	0.093787	3.3117	0.000927309	0.0239116
RAD51	ENSG00000051180.12	protein_coding	105.003	0.554883	0.167652	3.30974	0.000933827	0.0240006
BTBD3	ENSG00000132640.10	protein_coding	1980.17	0.337727	0.102157	3.30597	0.000946466	0.0242321
RQCD1	ENSG00000144580.9	protein_coding	1650.98	0.35572	0.107588	3.3063	0.000945357	0.0242321
SPC25	ENSG00000152253.4	protein_coding	36.4684	0.512854	0.155325	3.3018	0.00096066	0.0245484
PANK2	ENSG00000125779.17	protein_coding	1541.48	0.346263	0.104985	3.2982	0.000973068	0.0248179
ASS1	ENSG00000130707.13	protein_coding	400.172	-0.45088	0.136897	-3.29358	0.000989212	0.0251815
BTG1	ENSG00000133639.3	protein_coding	11154.5	0.364591	0.111111	3.28132	0.00103323	0.0262519
LGALSL	ENSG00000119862.8	protein_coding	517.969	-0.438714	0.133832	-3.27808	0.00104514	0.0265041
WBP11	ENSG00000084463.3	protein_coding	1789.37	0.337723	0.103216	3.27199	0.00106792	0.0270302
GLYR1	ENSG00000140632.12	protein_coding	1928.29	-0.338561	0.103625	-3.26718	0.00108626	0.0274424
NOMO2	ENSG00000185164.10	protein_coding	891.788	-0.382951	0.117381	-3.26246	0.0011045	0.0278033
POLE	ENSG00000177084.12	protein_coding	704.412	0.397946	0.121979	3.26241	0.00110471	0.0278033
CLCN5	ENSG00000171365.11	protein_coding	57.6932	-0.546041	0.16747	-3.26053	0.00111206	0.0279355
DUSP10	ENSG00000143507.13	protein_coding	352.508	0.451263	0.138443	3.25955	0.00111589	0.0279775
CDCA2	ENSG00000184661.9	protein_coding	133.98	0.545604	0.167413	3.25903	0.00111792	0.0279775
TRIM21	ENSG00000132109.8	protein_coding	817.57	-0.382584	0.117453	-3.25734	0.00112462	0.0280922
H2AFX	ENSG00000188486.3	protein_coding	774.15	0.414525	0.1273	3.25628	0.00112883	0.0281448
SPDEF	ENSG00000124664.6	protein_coding	3838.06	-0.338222	0.104006	-3.25194	0.00114621	0.028462
SNX29	ENSG00000048471.9	protein_coding	962.159	0.379822	0.116814	3.25151	0.00114795	0.028462
CENPI	ENSG00000102384.9	protein_coding	122.778	0.536239	0.164917	3.25156	0.00114772	0.028462
IREB2	ENSG00000136381.8	protein_coding	1252.5	-0.364649	0.112254	-3.24843	0.00116044	0.0287183
ATP13A2	ENSG00000159363.13	protein_coding	4476.93	0.368823	0.113578	3.24731	0.001165	0.0287776
XPO7	ENSG00000130227.12	protein_coding	3698.69	0.313304	0.0964991	3.24671	0.00116749	0.0287859
B4GALT5	ENSG00000158470.5	protein_coding	6780.57	0.29719	0.091553	3.2461	0.00116999	0.0287943
TBC1D4	ENSG00000136111.8	protein_coding	938.663	-0.37231	0.114768	-3.24401	0.00117861	0.0289529
CDC42EP3	ENSG00000163171.6	protein_coding	4355.97	0.306112	0.0944643	3.24051	0.00119316	0.0292567
RNASEH2A	ENSG00000104889.4	protein_coding	906.684	0.38111	0.117657	3.23915	0.00119888	0.0292987
RAD51AP1	ENSG00000111247.10	protein_coding	112.779	0.546189	0.168626	3.23905	0.00119927	0.0292987
RHOJ	ENSG00000126785.8	protein_coding	740.297	0.400268	0.123622	3.23785	0.00120436	0.0293692
C4orf46	ENSG00000205208.4	protein_coding	252.991	0.497568	0.153788	3.23543	0.00121461	0.0295257
CTD-2354A18.1	ENSG00000261780.2	processed_transcript	156.233	0.528678	0.16341	3.23529	0.00121521	0.0295257
CTSO	ENSG00000256043.2	protein_coding	374.59	-0.451839	0.13986	-3.23066	0.00123504	0.0298575
TUBA1A	ENSG00000167552.9	protein_coding	13327.6	0.297197	0.0919823	3.23102	0.00123348	0.0298575
UBE2T	ENSG00000077152.5	protein_coding	374.459	0.456422	0.141284	3.23054	0.00123557	0.0298575
GDE1	ENSG00000006007.7	protein_coding	2441.58	0.321025	0.0994104	3.22929	0.00124097	0.0299336
VIPR1-AS1	ENSG00000232354.3	antisense	98.7022	-0.54312	0.168258	-3.2279	0.00124704	0.0300257
NOMO1	ENSG00000103512.10	protein_coding	3013.23	-0.323826	0.100375	-3.22618	0.00125456	0.0301524
CCDC109B	ENSG00000005059.11	protein_coding	1619.1	0.354031	0.109773	3.22514	0.00125913	0.0302079
HIPK1	ENSG00000163349.17	protein_coding	2794.03	0.321444	0.0997946	3.22106	0.00127718	0.0305857
EXTL3	ENSG00000012232.4	protein_coding	3644.06	0.321445	0.0998729	3.21854	0.00128846	0.0308007
MARS	ENSG00000166986.8	protein_coding	3585.09	0.315761	0.0982361	3.2143	0.00130761	0.0312026
CKAP2L	ENSG00000169607.8	protein_coding	147.292	0.52684	0.163937	3.21368	0.00131046	0.0312146
SOX9	ENSG00000125398.5	protein_coding	6276.24	0.343173	0.106967	3.20822	0.00133558	0.0317563
PTP4A3	ENSG00000184489.7	protein_coding	188.831	-0.50262	0.156881	-3.20383	0.00135613	0.0321876
LHFPL2	ENSG00000145685.9	protein_coding	1650.25	0.344476	0.107679	3.1991	0.00137858	0.0326624
PDLIM3	ENSG00000154553.9	protein_coding	352.854	-0.447279	0.139849	-3.1983	0.00138243	0.0326651
VWA9	ENSG00000138614.10	protein_coding	623.587	0.394669	0.123409	3.19805	0.0013836	0.0326651
ARVCF	ENSG00000099889.9	protein_coding	515.983	0.453582	0.141968	3.19497	0.00139846	0.0329577
ZNFX1	ENSG00000124201.10	protein_coding	5701.72	0.304914	0.0955594	3.19084	0.00141861	0.0333737
KLHDC8B	ENSG00000185909.10	protein_coding	433.73	-0.434097	0.13609	-3.18978	0.00142381	0.033437
TCTN1	ENSG00000204852.11	protein_coding	709.644	-0.385095	0.120902	-3.18518	0.00144662	0.0339131
CDKN3	ENSG00000100526.15	protein_coding	220.919	0.499871	0.157006	3.18377	0.0014537	0.0340192
CDR2	ENSG00000140743.3	protein_coding	633.731	0.393539	0.123657	3.18251	0.00146007	0.0341083
HSPA1B	ENSG00000204388.5	protein_coding	4251.16	0.303344	0.0953629	3.18095	0.00146795	0.0342324
PARP14	ENSG00000173193.9	protein_coding	1141.77	-0.416474	0.130966	-3.18003	0.00147262	0.0342814
UPP1	ENSG00000183696.9	protein_coding	1738.94	0.340669	0.107245	3.17657	0.00149029	0.0346324
TUBA1B	ENSG00000123416.11	protein_coding	2464.76	0.326603	0.102936	3.17287	0.00150942	0.035016
BFAR	ENSG00000103429.6	protein_coding	1926.08	0.35369	0.111531	3.17123	0.00151793	0.0351522
GOLGA5	ENSG00000066455.8	protein_coding	1739.22	-0.351902	0.111	-3.17028	0.00152291	0.0352064
PLOD3	ENSG00000106397.7	protein_coding	3929.29	0.336457	0.106159	3.16936	0.00152775	0.0352572
CASP1	ENSG00000137752.18	protein_coding	209.602	-0.486956	0.153719	-3.16783	0.0015358	0.0353818
A2M	ENSG00000175899.10	protein_coding	532.18	0.443499	0.140094	3.16573	0.00154696	0.0355773
GTF3C3	ENSG00000119041.6	protein_coding	547.573	-0.42941	0.135666	-3.16519	0.0015498	0.0355815
MGAM	ENSG00000257335.4	protein_coding	59.1405	-0.526484	0.166879	-3.15489	0.00160559	0.0366995
C4B	ENSG00000224389.4	protein_coding	178.21	-0.514568	0.163109	-3.15475	0.00160634	0.0366995
TGM2	ENSG00000198959.7	protein_coding	15303.4	-0.325015	0.103026	-3.15468	0.00160675	0.0366995
ELFN2	ENSG00000166897.10	protein_coding	402.419	-0.44921	0.142469	-3.15304	0.00161582	0.0368159
C17orf51	ENSG00000212719.6	protein_coding	629.73	0.389311	0.123502	3.15226	0.00162013	0.0368159
ARHGAP5-AS1	ENSG00000258655.1	antisense	254.008	0.478132	0.151658	3.1527	0.00161768	0.0368159
RORA	ENSG00000069667.11	protein_coding	995.568	-0.410905	0.130384	-3.15151	0.00162431	0.0368481
SMC1A	ENSG00000072501.13	protein_coding	2911.97	0.332934	0.105836	3.14576	0.00165653	0.0375153
HIST1H2AC	ENSG00000180573.8	protein_coding	3505.09	-0.321022	0.1021	-3.14421	0.00166538	0.0375952
SIK1	ENSG00000142178.7	protein_coding	2517.69	0.361888	0.115099	3.14415	0.0016657	0.0375952
COL17A1	ENSG00000065618.12	protein_coding	988.266	0.355844	0.113204	3.14337	0.00167014	0.0376318
CPM	ENSG00000135678.7	protein_coding	150.698	0.505387	0.161009	3.13886	0.00169605	0.038151
TEF	ENSG00000167074.10	protein_coding	670.959	-0.381161	0.121575	-3.13519	0.00171745	0.0383621
HLA-DMB	ENSG00000242574.4	protein_coding	738.794	-0.381143	0.121593	-3.13458	0.00172102	0.0383621
SETD7	ENSG00000145391.9	protein_coding	2047.42	-0.321665	0.102628	-3.13429	0.00172269	0.0383621
LMNB2	ENSG00000176619.6	protein_coding	3267.17	0.313877	0.100085	3.13609	0.00171217	0.0383621
YBX3	ENSG00000060138.8	protein_coding	5878.12	0.344758	0.109923	3.13635	0.00171065	0.0383621
DSE	ENSG00000111817.12	protein_coding	1140.66	0.345818	0.110331	3.13437	0.00172224	0.0383621
SAT1	ENSG00000130066.12	protein_coding	16750.5	0.278808	0.0890795	3.12988	0.00174877	0.0388781
RAP1A	ENSG00000116473.10	protein_coding	1968.52	-0.370477	0.118558	-3.12485	0.00177893	0.0393519
MANF	ENSG00000145050.11	protein_coding	2780.46	-0.350583	0.112191	-3.12488	0.00177879	0.0393519
ALKBH5	ENSG00000091542.8	protein_coding	5065.74	0.329982	0.105587	3.12521	0.00177679	0.0393519
AC009237.8	ENSG00000229689.2	pseudogene	309.426	0.460615	0.147486	3.12311	0.00178951	0.0395203
TRIB1	ENSG00000173334.3	protein_coding	3669.97	-0.302673	0.0969475	-3.12203	0.00179607	0.0395997
LAPTM4B	ENSG00000104341.12	protein_coding	3463.71	0.30267	0.0969931	3.12053	0.00180527	0.0397369
PROCR	ENSG00000101000.4	protein_coding	1004.31	0.356172	0.114167	3.11974	0.00181014	0.0397782
DOK3	ENSG00000146094.9	protein_coding	208.743	0.482808	0.154813	3.11864	0.00181685	0.0398602
TP53RK	ENSG00000172315.5	protein_coding	1325.22	0.340474	0.109208	3.11767	0.00182288	0.0398614
MST4	ENSG00000134602.11	protein_coding	641.368	0.399004	0.127973	3.11788	0.00182159	0.0398614
TM4SF19	ENSG00000145107.11	protein_coding	86.757	-0.526089	0.1689	-3.11479	0.00184078	0.0400945
TFF3	ENSG00000160180.14	protein_coding	544.721	-0.403834	0.129663	-3.1145	0.00184256	0.0400945
NIP7	ENSG00000132603.9	protein_coding	613.394	0.39909	0.128115	3.11508	0.00183894	0.0400945
LINC00704	ENSG00000231298.2	lincRNA	1983.78	0.315672	0.101382	3.11368	0.00184768	0.0401235
ZBED4	ENSG00000100426.6	protein_coding	1716.91	0.334419	0.107415	3.11333	0.00184991	0.0401235
TOMM70A	ENSG00000154174.7	protein_coding	1937.85	-0.339938	0.10927	-3.111	0.00186457	0.0403759
PEA15	ENSG00000162734.8	protein_coding	6497.99	0.345043	0.110933	3.11037	0.00186853	0.040396
EFEMP1	ENSG00000115380.14	protein_coding	179.032	-0.490852	0.15784	-3.1098	0.00187211	0.040408
SH3BP2	ENSG00000087266.11	protein_coding	6634.79	-0.306583	0.0987878	-3.10345	0.0019128	0.0412196
LRG1	ENSG00000171236.9	protein_coding	67.6832	-0.52327	0.168694	-3.10189	0.0019229	0.0413702
EPHB2	ENSG00000133216.12	protein_coding	1181.75	-0.364002	0.117385	-3.10092	0.00192923	0.0414396
P2RY6	ENSG00000171631.10	protein_coding	77.3226	-0.523427	0.168913	-3.0988	0.00194307	0.0416698
TMEM71	ENSG00000165071.10	protein_coding	741.911	0.387434	0.125166	3.09536	0.00196576	0.0420888
CPNE7	ENSG00000178773.10	protein_coding	223.792	-0.486384	0.157405	-3.09002	0.00200145	0.0426755
ATAD3A	ENSG00000197785.9	protein_coding	930.763	0.373179	0.12075	3.09051	0.00199813	0.0426755
ITPKA	ENSG00000137825.6	protein_coding	217.359	0.473878	0.153367	3.08982	0.00200276	0.0426755
CNN3	ENSG00000117519.11	protein_coding	7654.05	0.301164	0.0975592	3.08698	0.002022	0.0428799
MAML1	ENSG00000161021.7	protein_coding	3202.89	0.319444	0.103468	3.08737	0.00201935	0.0428799
CENPN	ENSG00000166451.9	protein_coding	200.369	0.480216	0.155558	3.08706	0.00202147	0.0428799
RCC2	ENSG00000179051.9	protein_coding	4083.12	0.30597	0.0991587	3.08565	0.00203105	0.0430034
BDH1	ENSG00000161267.7	protein_coding	678.82	0.390968	0.12677	3.08408	0.00204181	0.0431628
KAZALD1	ENSG00000107821.10	protein_coding	451.628	-0.4064	0.131835	-3.08263	0.0020518	0.0433054
CDH4	ENSG00000179242.11	protein_coding	1256.91	0.398804	0.129398	3.08199	0.00205619	0.0433136
ORC6	ENSG00000091651.4	protein_coding	165.084	0.497169	0.161333	3.08163	0.00205869	0.0433136
BTN3A2	ENSG00000186470.9	protein_coding	2149.62	-0.314125	0.101954	-3.08103	0.00206283	0.0433325
PCSK6	ENSG00000140479.12	protein_coding	228.926	-0.472554	0.153515	-3.07823	0.00208234	0.0436736
PTGES	ENSG00000148344.10	protein_coding	969.011	-0.359522	0.116886	-3.07583	0.00209915	0.043957
EXO1	ENSG00000174371.12	protein_coding	83.9095	0.519327	0.168906	3.07465	0.00210749	0.0440623
CXCL3	ENSG00000163734.4	protein_coding	392.912	0.454736	0.148018	3.07216	0.00212516	0.0443623
NRG1	ENSG00000157168.14	protein_coding	1559.04	0.328399	0.107035	3.06814	0.00215396	0.0448932
SAPCD2	ENSG00000186193.7	protein_coding	227.954	0.47548	0.155003	3.06756	0.00215816	0.0449105
ALDH3B1	ENSG00000006534.11	protein_coding	858.058	-0.393394	0.128321	-3.06569	0.00217167	0.0450863
IFI44	ENSG00000137965.6	protein_coding	697.653	0.372642	0.121562	3.06546	0.00217336	0.0450863
C8orf4	ENSG00000176907.3	protein_coding	499.935	0.41797	0.136672	3.05819	0.00222676	0.0461224
IDS	ENSG00000010404.13	protein_coding	6748.23	0.283883	0.0928495	3.05745	0.00223227	0.0461648
LSM12	ENSG00000161654.5	protein_coding	2803.74	0.330741	0.108225	3.05605	0.00224274	0.0463094
TMEM170B	ENSG00000205269.4	protein_coding	392.045	-0.416748	0.136477	-3.05361	0.00226105	0.0466153
FRMD4A	ENSG00000151474.15	protein_coding	1907.52	0.329446	0.107916	3.05279	0.00226725	0.046671
PRKX	ENSG00000183943.5	protein_coding	405.546	0.411301	0.134755	3.05222	0.00227153	0.046687
ECM1	ENSG00000143369.10	protein_coding	4486.72	0.325239	0.106606	3.05084	0.002282	0.0468302
BHLHE41	ENSG00000123095.5	protein_coding	521.946	-0.39975	0.131221	-3.04639	0.00231609	0.0474567
MKRN1	ENSG00000133606.6	protein_coding	4444.06	0.300164	0.0986164	3.04376	0.00233645	0.0478005
LUCAT1	ENSG00000248323.1	lincRNA	520.879	-0.401782	0.132071	-3.04216	0.00234887	0.0479811
NEAT1	ENSG00000245532.4	lincRNA	6588.11	-0.290664	0.0956669	-3.0383	0.00237919	0.0485261
HIST2H2BE	ENSG00000184678.8	protein_coding	545.403	-0.386853	0.127618	-3.03133	0.00243477	0.0495837
LAMTOR2	ENSG00000116586.7	protein_coding	1256.64	-0.331431	0.10948	-3.02731	0.00246742	0.0501721
FAM83G	ENSG00000188522.10	protein_coding	1780.3	0.336857	0.111304	3.02647	0.00247426	0.0502347
SLC17A5	ENSG00000119899.11	protein_coding	4461.77	0.309312	0.102229	3.02568	0.00248075	0.0502898
FANCA	ENSG00000187741.10	protein_coding	220.748	0.459263	0.151831	3.02483	0.00248773	0.0503549
SH3KBP1	ENSG00000147010.13	protein_coding	3725.41	0.290918	0.0962491	3.02255	0.00250654	0.0506586
EFHC1	ENSG00000096093.10	protein_coding	435.445	-0.406902	0.134681	-3.02124	0.00251742	0.0508017
SLITRK6	ENSG00000184564.8	protein_coding	937.271	0.377154	0.12496	3.01821	0.00254272	0.0512346
NR4A2	ENSG00000153234.9	protein_coding	1317.61	0.328751	0.108983	3.01654	0.0025568	0.0514406
RP4-555D20.2	ENSG00000261786.1	lincRNA	1183	-0.33808	0.112117	-3.01541	0.00256631	0.0515543
FAF2	ENSG00000113194.8	protein_coding	2806.57	0.318812	0.105786	3.01374	0.00258052	0.0517616
KIAA0895	ENSG00000164542.8	protein_coding	168.412	-0.479702	0.159233	-3.01257	0.00259048	0.0518835
RNF39	ENSG00000204618.4	protein_coding	233.095	-0.458341	0.152221	-3.01102	0.00260376	0.0520712
ONECUT2	ENSG00000119547.5	protein_coding	204.578	-0.477825	0.158785	-3.00926	0.00261884	0.0521384
MARCKSL1	ENSG00000175130.6	protein_coding	39586.5	-0.290599	0.0965551	-3.00968	0.00261526	0.0521384
IGF2BP2	ENSG00000073792.11	protein_coding	2853.95	0.317977	0.105643	3.00991	0.00261324	0.0521384
LIMD1	ENSG00000144791.5	protein_coding	4049.35	-0.307219	0.102151	-3.0075	0.00263402	0.0522543
TNFRSF21	ENSG00000146072.6	protein_coding	13119.7	0.293901	0.0977108	3.00787	0.00263089	0.0522543
GALNT6	ENSG00000139629.11	protein_coding	2027.79	0.322438	0.107221	3.00723	0.00263642	0.0522543
CAMK1D	ENSG00000183049.8	protein_coding	2164.89	-0.309896	0.103124	-3.00509	0.00265498	0.0524768
CORO2B	ENSG00000103647.8	protein_coding	1949.61	0.337204	0.112213	3.00503	0.00265551	0.0524768
IMMP2L	ENSG00000184903.5	protein_coding	213.592	-0.46162	0.153655	-3.00426	0.00266231	0.052522
RNF4	ENSG00000063978.11	protein_coding	4157.3	0.284949	0.0948605	3.00387	0.00266567	0.052522
LINC00963	ENSG00000204054.7	processed_transcript	719.848	-0.373914	0.124585	-3.00127	0.00268852	0.0528161
STAMBPL1	ENSG00000138134.7	protein_coding	1590.85	0.326569	0.108796	3.00166	0.00268516	0.0528161
TP63	ENSG00000073282.8	protein_coding	58.0174	-0.501025	0.167002	-3.00011	0.00269881	0.0529403
TMCC2	ENSG00000133069.10	protein_coding	384.313	0.407866	0.136085	2.99714	0.00272524	0.0533465
CENPA	ENSG00000115163.10	protein_coding	80.0055	0.506027	0.168851	2.99689	0.00272752	0.0533465
F3	ENSG00000117525.9	protein_coding	8716.47	0.342715	0.114453	2.99438	0.00275007	0.0537089
PPP6R1	ENSG00000105063.14	protein_coding	4503.27	0.315639	0.105428	2.99387	0.00275461	0.0537188
FH	ENSG00000091483.6	protein_coding	1512.12	0.321142	0.1073	2.99293	0.00276313	0.0538065
FMO5	ENSG00000131781.8	protein_coding	170.521	-0.476268	0.159187	-2.99188	0.00277269	0.0539139
SERPINB9	ENSG00000170542.5	protein_coding	1440.58	0.326217	0.109082	2.99057	0.00278457	0.0540661
EEF1A1P6	ENSG00000233476.2	pseudogene	441.559	0.458111	0.153351	2.98733	0.00281424	0.0545626
POLR3D	ENSG00000168495.8	protein_coding	1177.7	0.352634	0.11807	2.98665	0.00282053	0.0546053
CBX1	ENSG00000108468.10	protein_coding	2690.9	0.307402	0.102989	2.9848	0.00283761	0.0548563
ATAD2	ENSG00000156802.8	protein_coding	803.81	0.375729	0.125971	2.98267	0.00285746	0.0551566
WDR62	ENSG00000075702.12	protein_coding	221.588	0.451988	0.15156	2.98225	0.00286141	0.0551566
C12orf57	ENSG00000111678.6	protein_coding	397.107	-0.428604	0.14393	-2.97787	0.00290262	0.0555496
BBS10	ENSG00000179941.6	protein_coding	891.864	-0.365055	0.122554	-2.97874	0.0028944	0.0555496
ERAP1	ENSG00000164307.8	protein_coding	1906.92	-0.317364	0.106572	-2.97794	0.00290189	0.0555496
RFFL	ENSG00000092871.12	protein_coding	1006.49	0.336619	0.113021	2.97838	0.00289777	0.0555496
CLCF1	ENSG00000175505.9	protein_coding	1400.65	0.35192	0.118119	2.97937	0.00288839	0.0555496
FAM109A	ENSG00000198324.10	protein_coding	2220.6	0.333585	0.112118	2.9753	0.00292701	0.055936
SPRY1	ENSG00000164056.6	protein_coding	2933.73	0.293013	0.0985609	2.97291	0.00294989	0.0561861
HNRNPM	ENSG00000099783.7	protein_coding	4845.05	0.307067	0.103287	2.97295	0.00294952	0.0561861
MND1	ENSG00000121211.3	protein_coding	73.6271	0.500735	0.168449	2.97262	0.00295273	0.0561861
IRAK1	ENSG00000184216.7	protein_coding	6121.37	0.293301	0.098706	2.97146	0.00296391	0.0563185
DHTKD1	ENSG00000181192.7	protein_coding	1178.03	0.333171	0.112161	2.97046	0.00297357	0.0564218
MCM7	ENSG00000166508.13	protein_coding	4433.98	0.284308	0.0957407	2.96957	0.00298219	0.0565048
LIMS1	ENSG00000169756.12	protein_coding	645.798	0.367116	0.123683	2.96821	0.00299544	0.0566755
CRISPLD2	ENSG00000103196.7	protein_coding	118.866	-0.49019	0.165307	-2.96532	0.00302367	0.0570589
HMGN4	ENSG00000182952.4	protein_coding	3012.55	0.299006	0.100836	2.96526	0.00302426	0.0570589
SCN5A	ENSG00000183873.11	protein_coding	746.038	-0.361392	0.121951	-2.96342	0.00304239	0.0573198
TUBGCP3	ENSG00000126216.8	protein_coding	709.983	0.356719	0.120516	2.95992	0.00307721	0.0578942
MARK3	ENSG00000075413.13	protein_coding	4317.29	0.282322	0.0954279	2.95848	0.00309157	0.0580824
ZMAT1	ENSG00000166432.10	protein_coding	225.648	-0.463286	0.156673	-2.95702	0.00310632	0.0581118
CMTM3	ENSG00000140931.15	protein_coding	1932.35	-0.305127	0.103191	-2.95691	0.00310742	0.0581118
MAT2A	ENSG00000168906.8	protein_coding	12145.2	-0.269401	0.0911043	-2.95706	0.00310588	0.0581118
OTUB2	ENSG00000089723.5	protein_coding	2110.88	0.298005	0.100793	2.95659	0.00311057	0.0581118
NGEF	ENSG00000066248.10	protein_coding	759.048	-0.372065	0.126227	-2.94759	0.00320262	0.0596785
CSRNP2	ENSG00000110925.2	protein_coding	1567.94	0.311631	0.105727	2.94752	0.00320337	0.0596785
IWS1	ENSG00000163166.9	protein_coding	729.587	0.368596	0.125113	2.9461	0.00321814	0.0598699
KCMF1	ENSG00000176407.13	protein_coding	3889.75	0.313198	0.106386	2.94398	0.00324025	0.0601974
DNMBP	ENSG00000107554.11	protein_coding	16355.3	0.264647	0.0899285	2.94286	0.00325196	0.0603308
ADPGK	ENSG00000159322.13	protein_coding	1331.14	-0.320502	0.109011	-2.94008	0.00328129	0.0607905
VPS13C	ENSG00000129003.11	protein_coding	746.168	-0.355525	0.121147	-2.93466	0.00333917	0.0617769
HNRNPA2B1	ENSG00000122566.16	protein_coding	13818.3	0.277464	0.094563	2.93418	0.00334435	0.061787
CAPS	ENSG00000105519.8	protein_coding	235.496	-0.439624	0.149996	-2.9309	0.0033798	0.0623453
EIF1AD	ENSG00000175376.4	protein_coding	1425.74	0.339311	0.115785	2.93052	0.00338391	0.0623453
C1orf132	ENSG00000203709.5	processed_transcript	1891.48	-0.343455	0.117259	-2.92904	0.00340008	0.0624706
GNE	ENSG00000159921.10	protein_coding	3269.55	0.316	0.107873	2.92938	0.00339641	0.0624706
CTSZ	ENSG00000101160.9	protein_coding	10600.1	-0.282857	0.0966527	-2.92653	0.00342765	0.0628046
TYMS	ENSG00000176890.11	protein_coding	265.887	0.444804	0.15199	2.92653	0.00342767	0.0628046
EPAS1	ENSG00000116016.9	protein_coding	4938.94	-0.289043	0.0988295	-2.92467	0.00344825	0.063095
FAM46C	ENSG00000183508.4	protein_coding	2723.87	0.333119	0.113923	2.92408	0.00345474	0.0631271
KIF24	ENSG00000186638.11	protein_coding	123.211	0.480951	0.164623	2.92153	0.00348321	0.0635603
RNF169	ENSG00000166439.5	protein_coding	955.385	0.337294	0.115491	2.92052	0.00349445	0.0636783
FYN	ENSG00000010810.13	protein_coding	2199.8	0.296328	0.101519	2.91893	0.0035123	0.0639161
TCP1	ENSG00000120438.7	protein_coding	4431.37	0.293975	0.100787	2.91681	0.00353634	0.0642661
OCIAD2	ENSG00000145247.7	protein_coding	3249.43	0.304568	0.104467	2.91545	0.00355173	0.0644172
PAQR4	ENSG00000162073.9	protein_coding	284.735	0.446235	0.15307	2.91523	0.00355432	0.0644172
PSMD2	ENSG00000175166.12	protein_coding	18610	0.267055	0.0916461	2.91399	0.00356847	0.0645859
PALM	ENSG00000099864.13	protein_coding	332.082	-0.410502	0.140908	-2.91326	0.00357672	0.0646475
VSIG10L	ENSG00000186806.5	protein_coding	441.682	-0.388406	0.133428	-2.91099	0.00360291	0.0650328
NFKBIA	ENSG00000100906.6	protein_coding	10429.8	0.28232	0.0970525	2.90894	0.00362651	0.0653703
CTSK	ENSG00000143387.8	protein_coding	206.092	-0.454593	0.156423	-2.90618	0.00365867	0.0658611
PIK3C2B	ENSG00000133056.9	protein_coding	673.191	-0.397608	0.136864	-2.90514	0.00367088	0.0659917
PRSS3	ENSG00000010438.12	protein_coding	1289.24	0.381175	0.131227	2.90469	0.00367613	0.0659971
FAM110A	ENSG00000125898.8	protein_coding	142.589	0.475906	0.163895	2.90372	0.00368753	0.0661128
C1orf198	ENSG00000119280.12	protein_coding	2219.32	0.3212	0.11064	2.90312	0.00369469	0.0661522
SDC4	ENSG00000124145.5	protein_coding	12925.1	0.331412	0.114233	2.9012	0.00371738	0.0664693
SECISBP2L	ENSG00000138593.4	protein_coding	1622.05	-0.316709	0.109189	-2.90057	0.00372483	0.0665134
SH3BGRL2	ENSG00000198478.6	protein_coding	235.528	-0.442019	0.152643	-2.89577	0.00378232	0.0674497
MRPS10	ENSG00000048544.5	protein_coding	2476.92	0.306007	0.105719	2.89452	0.00379734	0.0676271
PREPL	ENSG00000138078.11	protein_coding	753.422	-0.357773	0.123628	-2.89395	0.00380431	0.067661
ASAP3	ENSG00000088280.14	protein_coding	2289.36	-0.294392	0.101771	-2.89269	0.00381954	0.0677511
NUP54	ENSG00000138750.10	protein_coding	812.66	0.356039	0.123068	2.89302	0.00381559	0.0677511
NUP88	ENSG00000108559.7	protein_coding	1371.86	0.342546	0.118471	2.8914	0.00383534	0.067941
LRIG1	ENSG00000144749.9	protein_coding	572.259	-0.370639	0.12821	-2.89087	0.00384174	0.0679642
SIAH2	ENSG00000181788.3	protein_coding	1052.21	0.35381	0.122484	2.88863	0.00386918	0.068359
TFF2	ENSG00000160181.4	protein_coding	406.533	-0.399651	0.138499	-2.88558	0.00390692	0.0685884
RAB32	ENSG00000118508.4	protein_coding	1227.3	-0.335147	0.116115	-2.88633	0.00389759	0.0685884
BECN1	ENSG00000126581.8	protein_coding	2017	0.308012	0.106725	2.88604	0.00390125	0.0685884
SF3A3	ENSG00000183431.7	protein_coding	2397.95	0.317923	0.110179	2.8855	0.00390788	0.0685884
LYZ	ENSG00000090382.2	protein_coding	132.615	0.474271	0.164275	2.88706	0.0038886	0.0685884
TMOD2	ENSG00000128872.5	protein_coding	124.797	-0.480461	0.166581	-2.88425	0.0039235	0.0687721
KCNF1	ENSG00000162975.3	protein_coding	42.8858	0.468792	0.162845	2.87877	0.00399226	0.0698855
NABP1	ENSG00000173559.8	protein_coding	2871.52	-0.337142	0.117143	-2.87804	0.00400148	0.0699552
FURIN	ENSG00000140564.6	protein_coding	2257.06	0.328499	0.114213	2.8762	0.00402495	0.0702733
MAPK14	ENSG00000112062.6	protein_coding	5122.95	-0.26777	0.0932085	-2.8728	0.00406845	0.070755
SNX19	ENSG00000120451.6	protein_coding	3246.26	0.277259	0.0964943	2.87332	0.00406177	0.070755
MAN2A2	ENSG00000196547.10	protein_coding	971.755	0.35644	0.124061	2.8731	0.00406461	0.070755
PCGF1	ENSG00000115289.8	protein_coding	796.202	-0.349255	0.121606	-2.87203	0.00407848	0.0708371
RELT	ENSG00000054967.8	protein_coding	624.696	0.368268	0.128285	2.8707	0.00409561	0.0709498
RP11-488P3.1	ENSG00000230439.2	sense_intronic	195.245	0.446992	0.15569	2.87103	0.00409135	0.0709498
EHF	ENSG00000135373.8	protein_coding	3019.31	-0.295441	0.103002	-2.86829	0.00412697	0.0714004
AEN	ENSG00000181026.13	protein_coding	571.108	0.361538	0.126171	2.86547	0.00416391	0.0719461
MXRA7	ENSG00000182534.9	protein_coding	6868.1	-0.331181	0.115624	-2.86431	0.00417924	0.0721177
IL1RAP	ENSG00000196083.5	protein_coding	2075.15	-0.314684	0.109952	-2.86202	0.00420947	0.0723413
DNAJC13	ENSG00000138246.11	protein_coding	1848.88	-0.312851	0.109316	-2.86188	0.00421132	0.0723413
LAMA3	ENSG00000053747.11	protein_coding	8204.03	-0.282491	0.0987371	-2.86105	0.00422246	0.0723413
HNRNPA3	ENSG00000170144.14	protein_coding	4721.31	0.291041	0.101731	2.86089	0.00422459	0.0723413
TRAFD1	ENSG00000135148.7	protein_coding	2386.17	0.29349	0.102587	2.86087	0.00422474	0.0723413
MB21D1	ENSG00000164430.11	protein_coding	1153.63	0.329536	0.115152	2.86175	0.00421314	0.0723413
HARS2	ENSG00000112855.10	protein_coding	1901.7	0.30676	0.107361	2.85729	0.00427275	0.0730696
RANBP1	ENSG00000099901.12	protein_coding	1256.6	0.3137	0.109828	2.85629	0.0042863	0.0732074
PHYHD1	ENSG00000175287.14	protein_coding	2161.76	-0.289686	0.101444	-2.85561	0.00429543	0.0732421
RGMB	ENSG00000174136.7	protein_coding	5259.84	0.278397	0.0975009	2.85532	0.00429932	0.0732421
LOX	ENSG00000113083.8	protein_coding	10191.4	-0.313225	0.10972	-2.85476	0.0043069	0.0732778
LCOR	ENSG00000196233.7	protein_coding	928.179	-0.338124	0.118513	-2.85306	0.00433004	0.0735776
KIF14	ENSG00000118193.7	protein_coding	130.99	0.467262	0.16393	2.85038	0.00436676	0.0741072
RFC5	ENSG00000111445.9	protein_coding	545.47	0.365105	0.128292	2.84589	0.00442874	0.0750635
HDAC3	ENSG00000171720.5	protein_coding	3003.72	-0.278393	0.0978491	-2.84513	0.00443936	0.0751481
PDLIM5	ENSG00000163110.10	protein_coding	5557.76	0.265329	0.0933025	2.84375	0.00445863	0.0753588
ISOC1	ENSG00000066583.7	protein_coding	605.561	0.363803	0.127945	2.84343	0.00446311	0.0753588
NIPA2	ENSG00000140157.10	protein_coding	1396.68	0.324293	0.114074	2.84282	0.00447158	0.0754063
GBAS	ENSG00000146729.5	protein_coding	1701.71	-0.31004	0.109184	-2.83961	0.00451694	0.0760392
PSMD14	ENSG00000115233.7	protein_coding	2272.77	0.295692	0.104141	2.83935	0.00452051	0.0760392
AFAP1	ENSG00000196526.6	protein_coding	7930.55	0.264573	0.0932201	2.83815	0.00453755	0.0762297
2006-09-01	ENSG00000125354.18	protein_coding	666.713	0.351276	0.123932	2.83442	0.00459087	0.0770285
MLX	ENSG00000108788.7	protein_coding	2343.2	0.307891	0.108643	2.83398	0.00459725	0.0770385
RBM17	ENSG00000134453.11	protein_coding	1809.27	0.292862	0.103384	2.83277	0.00461469	0.0772338
PFDN2	ENSG00000143256.4	protein_coding	2024.47	0.287496	0.101598	2.82974	0.00465865	0.0778718
ZNF192P1	ENSG00000226314.3	pseudogene	67.6487	-0.475932	0.168247	-2.82877	0.00467276	0.07801
SLC25A36	ENSG00000114120.7	protein_coding	2940.03	-0.301948	0.106924	-2.82394	0.00474365	0.0789545
CDS2	ENSG00000101290.9	protein_coding	3180.9	-0.272417	0.0964484	-2.82449	0.00473565	0.0789545
ESRG	ENSG00000265992.1	sense_intronic	616.598	0.412983	0.146255	2.82371	0.0047471	0.0789545
SDR16C5	ENSG00000170786.8	protein_coding	815.782	-0.330282	0.117022	-2.82239	0.00476669	0.0791817
SEMA6D	ENSG00000137872.11	protein_coding	84.5355	-0.475794	0.1689	-2.81701	0.00484728	0.0804202
KCTD10	ENSG00000110906.8	protein_coding	6084.33	-0.263047	0.0934564	-2.81465	0.00488307	0.0809134
PRDM1	ENSG00000057657.10	protein_coding	565.837	0.354056	0.125834	2.81368	0.00489777	0.0810562
ABRACL	ENSG00000146386.7	protein_coding	1200.47	0.3337	0.118658	2.81228	0.00491914	0.0813091
DMXL1	ENSG00000172869.10	protein_coding	1109.32	-0.323643	0.115142	-2.81082	0.00494155	0.0814776
LRRFIP1	ENSG00000124831.14	protein_coding	2181.03	-0.292451	0.104036	-2.81105	0.00493807	0.0814776
ETFB	ENSG00000105379.5	protein_coding	766.116	-0.33263	0.118376	-2.80995	0.00495489	0.081563
MCM3	ENSG00000112118.13	protein_coding	3149.93	0.272078	0.0968494	2.80929	0.00496508	0.081563
MEX3B	ENSG00000183496.5	protein_coding	384.78	0.382323	0.13609	2.80934	0.00496436	0.081563
RBM15B	ENSG00000179837.6	protein_coding	3647.5	0.300379	0.106987	2.80763	0.0049907	0.0818832
CDCA4	ENSG00000170779.10	protein_coding	1192.06	0.314552	0.112062	2.80696	0.0050012	0.0819545
RAB30	ENSG00000137502.5	protein_coding	475.949	-0.371272	0.132317	-2.80593	0.00501715	0.0821112
RANGAP1	ENSG00000100401.15	protein_coding	4620.68	0.273604	0.097536	2.80516	0.00502922	0.0821112
RNF11	ENSG00000123091.4	protein_coding	5162.6	0.274873	0.0980023	2.80476	0.00503538	0.0821112
LIPG	ENSG00000101670.7	protein_coding	239.695	0.43933	0.156626	2.80496	0.00503233	0.0821112
HNRNPH3	ENSG00000096746.13	protein_coding	2365.49	0.28104	0.100233	2.80387	0.00504937	0.0822388
GRPEL1	ENSG00000109519.8	protein_coding	2358.96	0.285204	0.101793	2.80179	0.00508195	0.0826684
RAD54L	ENSG00000085999.7	protein_coding	111.813	0.466184	0.166422	2.80121	0.00509111	0.0827165
CLEC2B	ENSG00000110852.4	protein_coding	538.032	-0.400634	0.143097	-2.79973	0.00511454	0.0829962
VGLL4	ENSG00000144560.9	protein_coding	2514.97	-0.285293	0.101971	-2.79778	0.00514549	0.0833969
CTGF	ENSG00000118523.5	protein_coding	3697.32	0.318581	0.114249	2.78848	0.00529553	0.0856917
DBF4B	ENSG00000161692.13	protein_coding	215.171	0.428744	0.15377	2.78822	0.00529992	0.0856917
ARSG	ENSG00000141337.8	protein_coding	291.12	-0.40436	0.145129	-2.78621	0.00533288	0.0861202
PSD3	ENSG00000156011.12	protein_coding	4734.71	-0.274523	0.0985507	-2.7856	0.00534281	0.0861763
TSG101	ENSG00000074319.8	protein_coding	3670.79	0.278522	0.100015	2.78479	0.00535627	0.086289
FAM179B	ENSG00000198718.8	protein_coding	637.544	-0.363086	0.130412	-2.78416	0.00536669	0.0863526
SHCBP1	ENSG00000171241.4	protein_coding	81.9287	0.469608	0.168902	2.78035	0.00542998	0.0872657
DPY19L1	ENSG00000173852.9	protein_coding	2652.36	-0.288738	0.103882	-2.77949	0.00544446	0.0873931
ARHGAP5	ENSG00000100852.8	protein_coding	11116.8	0.292067	0.105189	2.77659	0.00549327	0.0880706
S100A2	ENSG00000196754.6	protein_coding	1018.55	-0.312107	0.112462	-2.77522	0.00551647	0.0882304
SERINC3	ENSG00000132824.9	protein_coding	14191.1	0.249493	0.0898986	2.77527	0.00551563	0.0882304
EHD4	ENSG00000103966.5	protein_coding	1975.49	0.3373	0.121589	2.77411	0.00553533	0.0884261
MT-RNR1	ENSG00000211459.2	Mt_rRNA	36467.2	-0.252275	0.0910219	-2.77158	0.00557847	0.0887961
NAV3	ENSG00000067798.9	protein_coding	1416.84	0.306907	0.110728	2.77172	0.00557612	0.0887961
BRI3BP	ENSG00000184992.10	protein_coding	336.331	0.387711	0.139857	2.7722	0.0055679	0.0887961
EGFR	ENSG00000146648.11	protein_coding	10968.6	0.255307	0.0921545	2.77042	0.00559836	0.0890065
COX5A	ENSG00000178741.7	protein_coding	1538.96	0.297212	0.107393	2.76752	0.00564852	0.0896972
MKL2	ENSG00000186260.12	protein_coding	519.195	-0.395611	0.143122	-2.76416	0.00570702	0.0905183
SEL1L	ENSG00000071537.9	protein_coding	6332.72	-0.28731	0.104022	-2.762	0.00574487	0.0908363
AUP1	ENSG00000115307.12	protein_coding	4960.25	0.272194	0.0985644	2.76158	0.0057522	0.0908363
IL17RD	ENSG00000144730.12	protein_coding	1890.45	0.296483	0.10736	2.76159	0.00575213	0.0908363
COQ10B	ENSG00000115520.4	protein_coding	541.172	0.350092	0.126795	2.76108	0.00576111	0.0908363
MIS18A	ENSG00000159055.3	protein_coding	149.971	0.444436	0.160948	2.76136	0.00575614	0.0908363
NDUFB5	ENSG00000136521.8	protein_coding	1697.98	-0.325753	0.118112	-2.75801	0.00581543	0.0915844
HLA-DMA	ENSG00000204257.10	protein_coding	2742.77	-0.271102	0.0984081	-2.75488	0.00587141	0.092357
STMN1	ENSG00000117632.16	protein_coding	13232.1	0.280439	0.102039	2.74836	0.00598947	0.0941031
TTYH3	ENSG00000136295.10	protein_coding	6260.56	0.316737	0.115272	2.74775	0.00600065	0.0941679
TAF15	ENSG00000172660.7	protein_coding	3733.48	0.279205	0.101652	2.74666	0.00602052	0.0943687
HSP90AB1	ENSG00000096384.15	protein_coding	56752.6	0.24298	0.0884825	2.74608	0.00603113	0.0944239
DYNC2H1	ENSG00000187240.9	protein_coding	695.018	-0.36108	0.131701	-2.74167	0.00611282	0.0955908
B3GALNT1	ENSG00000169255.9	protein_coding	263.473	-0.413884	0.151073	-2.73963	0.00615084	0.0959604
L3HYPDH	ENSG00000126790.7	protein_coding	901.383	-0.321892	0.11748	-2.73996	0.00614464	0.0959604
RP11-417E7.1	ENSG00000223485.1	lincRNA	692.234	-0.359189	0.13115	-2.73877	0.006167	0.0961001
THBS3	ENSG00000169231.9	protein_coding	618.574	-0.354529	0.129532	-2.737	0.00620029	0.0965061
STIP1	ENSG00000168439.12	protein_coding	7956.25	0.255373	0.0933299	2.73624	0.00621457	0.0966156
SNTA1	ENSG00000101400.5	protein_coding	553.902	-0.348634	0.127493	-2.73454	0.00624683	0.097004
PGM2L1	ENSG00000165434.6	protein_coding	840.235	0.370422	0.135543	2.73288	0.00627834	0.09738
GID4	ENSG00000141034.5	protein_coding	901.512	0.317907	0.116447	2.73007	0.00633217	0.0980748
FBXO33	ENSG00000165355.7	protein_coding	895.147	0.323343	0.11845	2.72977	0.00633784	0.0980748
SQLE	ENSG00000104549.7	protein_coding	1758.97	0.336417	0.123297	2.7285	0.00636223	0.0983381
FCHSD1	ENSG00000197948.6	protein_coding	2717.44	-0.286487	0.105031	-2.72763	0.0063791	0.0983708
ITGA5	ENSG00000161638.6	protein_coding	33456.5	0.290226	0.106399	2.72772	0.00637744	0.0983708
ITGB2	ENSG00000160255.12	protein_coding	1243.14	-0.309332	0.113424	-2.72722	0.00638712	0.0983808
HNRNPF	ENSG00000169813.12	protein_coding	9997.49	0.247835	0.0909179	2.72593	0.00641216	0.0985389
FAM111B	ENSG00000189057.6	protein_coding	92.1902	0.459451	0.168543	2.72602	0.00641025	0.0985389
BTN3A3	ENSG00000111801.11	protein_coding	1446.43	-0.292274	0.107254	-2.72506	0.00642899	0.0986838
DPY19L3	ENSG00000178904.14	protein_coding	1021.5	-0.325244	0.119431	-2.72327	0.00646392	0.0989598
RAB2A	ENSG00000104388.10	protein_coding	2619.33	-0.298378	0.10957	-2.72317	0.00646588	0.0989598
GSG2	ENSG00000177602.4	protein_coding	64.5325	0.458869	0.168516	2.723	0.00646922	0.0989598
CHEK1	ENSG00000149554.8	protein_coding	740.117	0.331217	0.121657	2.72255	0.00647803	0.0989811
CNIH4	ENSG00000143771.7	protein_coding	3100.7	0.28398	0.104417	2.71967	0.00653471	0.0997328
TDRKH	ENSG00000182134.11	protein_coding	613.377	0.338706	0.124623	2.71785	0.00657066	0.100167
POP1	ENSG00000104356.6	protein_coding	288.984	0.394427	0.145297	2.71462	0.00663511	0.101034
TC2N	ENSG00000165929.8	protein_coding	256.866	-0.408793	0.150647	-2.71358	0.00665611	0.101238
XRN1	ENSG00000114127.6	protein_coding	800.883	-0.320798	0.118342	-2.71077	0.00671275	0.101983
H2AFZ	ENSG00000164032.7	protein_coding	6544.23	0.294357	0.108626	2.70982	0.006732	0.102159
NONO	ENSG00000147140.11	protein_coding	17370.3	0.244947	0.0904621	2.70773	0.00677458	0.102456
DDX58	ENSG00000107201.5	protein_coding	3590.17	0.276947	0.102278	2.70779	0.00677337	0.102456
WFS1	ENSG00000109501.9	protein_coding	6384.61	0.303463	0.112052	2.70822	0.00676444	0.102456
CLSPN	ENSG00000092853.9	protein_coding	103.891	0.456201	0.168528	2.70698	0.00678984	0.10257
DYNLT3	ENSG00000165169.6	protein_coding	2277.84	-0.336756	0.124422	-2.70655	0.00679858	0.102586
NRP2	ENSG00000118257.12	protein_coding	345.611	0.386634	0.14291	2.70544	0.00682134	0.102813
UBA5	ENSG00000081307.8	protein_coding	440.441	-0.358729	0.132636	-2.70462	0.00683832	0.102953
FAF1	ENSG00000185104.15	protein_coding	1500.76	0.286531	0.105962	2.70409	0.00684912	0.102999
CCNJL	ENSG00000135083.10	protein_coding	2749.91	0.265258	0.0981136	2.70358	0.00685967	0.103042
VOPP1	ENSG00000154978.8	protein_coding	3389.87	0.269705	0.0999088	2.69951	0.00694425	0.104195
COQ5	ENSG00000110871.10	protein_coding	734.395	-0.321541	0.119133	-2.69901	0.00695459	0.104233
PIP5KL1	ENSG00000167103.7	protein_coding	179.582	-0.426089	0.157965	-2.69736	0.0069892	0.104364
KMT2A	ENSG00000118058.16	protein_coding	3866.16	-0.296917	0.110069	-2.69756	0.00698498	0.104364
PPP1R3B	ENSG00000173281.4	protein_coding	853.839	0.317034	0.117504	2.69806	0.00697442	0.104364
TNFRSF19	ENSG00000127863.11	protein_coding	484.942	0.368326	0.136564	2.6971	0.00699466	0.104364
BLOC1S5	ENSG00000188428.12	protein_coding	690.001	-0.345115	0.128098	-2.69415	0.00705674	0.105173
PTPRJ	ENSG00000149177.8	protein_coding	3988.81	-0.289126	0.107367	-2.69287	0.00708392	0.10546
GPCPD1	ENSG00000125772.8	protein_coding	910.907	-0.32644	0.121289	-2.69143	0.00711465	0.105744
RTF1	ENSG00000137815.10	protein_coding	1566.04	0.305112	0.113373	2.69123	0.00711882	0.105744
OLFML2A	ENSG00000185585.15	protein_coding	1571.69	-0.323842	0.120352	-2.69078	0.00712842	0.105769
SLC3A2	ENSG00000168003.12	protein_coding	5109.51	0.261548	0.0972421	2.68966	0.00715247	0.106007
PVR	ENSG00000073008.10	protein_coding	2637.57	0.298975	0.111182	2.68907	0.00716521	0.106021
SIPA1	ENSG00000213445.4	protein_coding	2355.54	0.311216	0.115742	2.68888	0.00716928	0.106021
KIAA1598	ENSG00000187164.13	protein_coding	605.444	-0.340611	0.126712	-2.68808	0.00718647	0.106158
VKORC1L1	ENSG00000196715.5	protein_coding	394.441	0.3767	0.140161	2.68762	0.00719639	0.106186
GNB1	ENSG00000078369.13	protein_coding	25221.7	0.245271	0.0912978	2.6865	0.00722056	0.106425
KIF3C	ENSG00000084731.9	protein_coding	3876.97	-0.268317	0.0998946	-2.686	0.00723127	0.106466
GGH	ENSG00000137563.7	protein_coding	826.622	0.348732	0.12989	2.68482	0.00725698	0.106726
RABIF	ENSG00000183155.4	protein_coding	948.602	0.308357	0.114946	2.68262	0.00730489	0.107313
RP11-800A3.4	ENSG00000260401.1	sense_overlapping	711.095	-0.341133	0.12721	-2.68165	0.00732598	0.107386
ERCC3	ENSG00000163161.8	protein_coding	1785.79	-0.277773	0.103574	-2.68187	0.00732108	0.107386
TRIM66	ENSG00000166436.11	protein_coding	310.348	-0.393494	0.146781	-2.68082	0.00734419	0.107535
AAMDC	ENSG00000087884.10	protein_coding	197.589	0.419148	0.156378	2.68036	0.00735438	0.107566
PRNP	ENSG00000171867.12	protein_coding	8889.6	0.245983	0.0918231	2.67888	0.00738678	0.107921
NCK2	ENSG00000071051.9	protein_coding	1069.34	0.301775	0.112675	2.67828	0.00740006	0.107997
C9orf152	ENSG00000188959.9	protein_coding	174.798	-0.430023	0.160709	-2.67579	0.00745524	0.108684
SLC25A14	ENSG00000102078.11	protein_coding	293.634	-0.399253	0.14927	-2.6747	0.00747957	0.108919
RP11-1024P17.1	ENSG00000261468.1	sense_overlapping	96.933	-0.449408	0.168253	-2.67102	0.00756213	0.109882
FGD5-AS1	ENSG00000225733.1	antisense	4436.26	0.253094	0.0947531	2.67109	0.00756058	0.109882
PRPF4	ENSG00000136875.8	protein_coding	1663.64	0.280868	0.105192	2.67005	0.0075841	0.110081
EEF1A2	ENSG00000101210.6	protein_coding	798.164	-0.331548	0.124297	-2.6674	0.00764409	0.110711
SMAD1	ENSG00000170365.5	protein_coding	267.882	0.400744	0.150224	2.66764	0.00763863	0.110711
EFCAB2	ENSG00000203666.8	protein_coding	192.088	-0.416922	0.156371	-2.66624	0.00767048	0.110942
ADPRHL1	ENSG00000153531.8	protein_coding	315.578	-0.392425	0.147198	-2.66597	0.00767669	0.110942
ZCCHC2	ENSG00000141664.5	protein_coding	867.335	0.307327	0.115298	2.66549	0.00768755	0.110979
RNF157	ENSG00000141576.10	protein_coding	47.7835	-0.437263	0.164237	-2.66239	0.00775874	0.111648
TMX4	ENSG00000125827.4	protein_coding	1343.79	0.289781	0.108844	2.66235	0.00775972	0.111648
GPATCH4	ENSG00000160818.12	protein_coding	451.347	0.354261	0.13308	2.66202	0.00776741	0.111648
LRRC1	ENSG00000137269.10	protein_coding	340.914	0.37952	0.142559	2.66221	0.00776303	0.111648
TNFRSF10C	ENSG00000173535.9	protein_coding	160.971	-0.431283	0.162038	-2.66161	0.00777668	0.111661
TSPAN5	ENSG00000168785.3	protein_coding	5426.65	0.280508	0.105497	2.65892	0.0078391	0.112255
PTGER4	ENSG00000171522.5	protein_coding	213.165	0.405289	0.152402	2.65934	0.0078295	0.112255
NFATC2	ENSG00000101096.15	protein_coding	162.42	0.424298	0.159586	2.65874	0.00784331	0.112255
DEPDC1B	ENSG00000035499.8	protein_coding	79.9736	0.448002	0.168915	2.65223	0.0079963	0.114322
MAP7D1	ENSG00000116871.11	protein_coding	6076.66	0.292434	0.110363	2.64974	0.00805533	0.115043
C5orf45	ENSG00000161010.10	protein_coding	1542.61	-0.2824	0.106612	-2.64885	0.00807668	0.115224
LONRF2	ENSG00000170500.8	protein_coding	257.751	-0.413106	0.156193	-2.64484	0.0081729	0.116008
FHL1	ENSG00000022267.12	protein_coding	1173.48	-0.290015	0.109634	-2.64531	0.00816158	0.116008
MRFAP1	ENSG00000179010.10	protein_coding	13049.8	0.255145	0.0964652	2.64495	0.00817034	0.116008
MSANTD3	ENSG00000066697.10	protein_coding	2006.63	0.295391	0.111689	2.64475	0.00817507	0.116008
CDKN2C	ENSG00000123080.6	protein_coding	1008.44	0.303645	0.114755	2.64602	0.00814451	0.116008
SCNN1A	ENSG00000111319.8	protein_coding	773.192	-0.321023	0.121403	-2.64428	0.00818656	0.116047
ZBTB7A	ENSG00000178951.4	protein_coding	3535.94	0.307249	0.116233	2.6434	0.0082078	0.116225
TNXB	ENSG00000168477.13	protein_coding	1414.15	-0.322407	0.122023	-2.64219	0.00823721	0.116518
TRIB3	ENSG00000101255.6	protein_coding	2255.68	-0.274786	0.104048	-2.64096	0.00826722	0.116818
RNF213	ENSG00000173821.15	protein_coding	10815.2	-0.27304	0.103405	-2.64049	0.00827862	0.116856
KRT18	ENSG00000111057.6	protein_coding	4770.96	-0.248093	0.0939945	-2.63944	0.00830434	0.117095
ALYREF	ENSG00000183684.6	protein_coding	1173.64	0.291269	0.11037	2.63902	0.00831467	0.117117
BCAP31	ENSG00000185825.11	protein_coding	11534.7	0.252022	0.0955547	2.63746	0.00835293	0.117408
OGFOD1	ENSG00000087263.12	protein_coding	600.936	0.327994	0.12436	2.63746	0.00835289	0.117408
NUP205	ENSG00000155561.10	protein_coding	1469.5	0.300244	0.113855	2.63707	0.00836265	0.11742
KRT81	ENSG00000205426.6	protein_coding	298.88	-0.38485	0.145993	-2.63608	0.00838693	0.117514
PERP	ENSG00000112378.11	protein_coding	7525.2	0.252059	0.0956107	2.63631	0.00838143	0.117514
TPRG1L	ENSG00000158109.10	protein_coding	3782.07	-0.257206	0.0976633	-2.6336	0.00844844	0.117937
APP	ENSG00000142192.16	protein_coding	55257.7	0.23852	0.0905647	2.6337	0.00844603	0.117937
CCDC50	ENSG00000152492.9	protein_coding	8520.89	0.258376	0.0981134	2.63344	0.0084525	0.117937
CDC42EP1	ENSG00000128283.6	protein_coding	1383.44	0.330095	0.125308	2.63426	0.00843207	0.117937
EPB41L2	ENSG00000079819.12	protein_coding	2889.45	0.256832	0.0975871	2.63182	0.00849287	0.118276
RFC4	ENSG00000163918.6	protein_coding	349.141	0.368641	0.140074	2.63175	0.00849454	0.118276
CDC34	ENSG00000099804.4	protein_coding	2789.01	0.274232	0.104246	2.63062	0.00852292	0.118548
PPP4R1L	ENSG00000124224.12	protein_coding	1436.36	-0.280519	0.106746	-2.6279	0.00859143	0.119376
SLFN5	ENSG00000166750.5	protein_coding	1641.08	-0.300068	0.114224	-2.62702	0.00861351	0.119533
SERBP1	ENSG00000142864.10	protein_coding	7507.01	0.252045	0.0959533	2.62674	0.00862062	0.119533
USP25	ENSG00000155313.11	protein_coding	1507.05	-0.2993	0.113962	-2.62631	0.00863151	0.119559
RP11-220I1.1	ENSG00000233137.2	lincRNA	1529.38	-0.284089	0.108187	-2.62591	0.00864174	0.119577
GOLPH3	ENSG00000113384.9	protein_coding	3439.7	0.253092	0.0964569	2.62389	0.00869329	0.119845
SDC3	ENSG00000162512.11	protein_coding	7660.42	0.254415	0.0969666	2.62374	0.00869706	0.119845
MAPKAPK5	ENSG00000089022.9	protein_coding	1226.02	0.293581	0.111881	2.62405	0.00868909	0.119845
FERMT1	ENSG00000101311.11	protein_coding	3004.64	0.318917	0.121526	2.62427	0.00868354	0.119845
GSPT1	ENSG00000103342.8	protein_coding	3409.02	0.284911	0.108671	2.62178	0.00874714	0.120411
PIF1	ENSG00000140451.8	protein_coding	44.7699	0.425551	0.162346	2.62125	0.00876072	0.120473
ILF2	ENSG00000143621.12	protein_coding	7209.9	0.242705	0.0926148	2.62058	0.00877792	0.120586
PLEKHO1	ENSG00000023902.9	protein_coding	708.393	0.320672	0.122402	2.61982	0.00879763	0.120732
THBS2	ENSG00000186340.10	protein_coding	539.505	-0.333366	0.127329	-2.61815	0.00884074	0.121075
PLEKHB2	ENSG00000115762.12	protein_coding	4963.34	0.248996	0.0951001	2.61825	0.0088381	0.121075
ATP6V0D1	ENSG00000159720.7	protein_coding	2040.35	-0.273482	0.104592	-2.61475	0.00892935	0.122135
PAFAH1B2	ENSG00000168092.9	protein_coding	3691.32	0.259619	0.0993075	2.61429	0.00894123	0.122135
GEMIN5	ENSG00000082516.8	protein_coding	823.343	0.308422	0.117983	2.61412	0.00894567	0.122135
SLC7A7	ENSG00000155465.14	protein_coding	191.263	-0.405867	0.155306	-2.61335	0.00896603	0.122163
NAA20	ENSG00000173418.7	protein_coding	1478.76	-0.282091	0.107931	-2.61362	0.00895878	0.122163
PLS3	ENSG00000102024.13	protein_coding	13213.7	0.269821	0.10327	2.61276	0.0089815	0.122249
TOR4A	ENSG00000198113.2	protein_coding	3379.12	0.32961	0.126219	2.61142	0.00901669	0.122603
ANKFN1	ENSG00000153930.6	protein_coding	196.985	0.407082	0.155913	2.61096	0.00902884	0.122643
MED6	ENSG00000133997.7	protein_coding	402.456	0.37516	0.143765	2.60955	0.00906623	0.123026
TMEM154	ENSG00000170006.7	protein_coding	2321.41	0.28149	0.107894	2.60896	0.00908185	0.123113
MANBA	ENSG00000109323.4	protein_coding	900.289	0.307236	0.11778	2.60855	0.00909256	0.123133
NCMAP	ENSG00000184454.6	protein_coding	51.6119	-0.431376	0.165408	-2.60795	0.00910875	0.123227
KDELC2	ENSG00000178202.8	protein_coding	500.318	-0.364239	0.139711	-2.60709	0.00913146	0.123409
FCGBP	ENSG00000090920.9	protein_coding	376.445	-0.38041	0.145939	-2.60663	0.0091437	0.123434
SF3B3	ENSG00000189091.8	protein_coding	4551.07	0.255021	0.0978467	2.60633	0.00915181	0.123434
PARP9	ENSG00000138496.12	protein_coding	826.06	-0.322148	0.123621	-2.60594	0.00916233	0.123451
PEX19	ENSG00000162735.14	protein_coding	2149.79	0.276998	0.106322	2.60526	0.00918034	0.123569
FAM175B	ENSG00000165660.7	protein_coding	668.354	-0.338415	0.12996	-2.60399	0.00921446	0.123654
LDLRAD3	ENSG00000179241.8	protein_coding	829.795	0.316489	0.12153	2.60419	0.00920906	0.123654
EDNRB	ENSG00000136160.10	protein_coding	262.863	0.387202	0.148671	2.60442	0.00920301	0.123654
C9orf40	ENSG00000135045.6	protein_coding	457.562	0.343627	0.132127	2.60073	0.00930269	0.124712
CREBRF	ENSG00000164463.8	protein_coding	2310.33	-0.2902	0.111721	-2.59755	0.00938926	0.125746
HSPA6	ENSG00000173110.6	protein_coding	258.406	0.389035	0.149813	2.59681	0.00940934	0.125889
NCEH1	ENSG00000144959.5	protein_coding	3039.95	0.258927	0.0997936	2.59462	0.00946952	0.126567
MRPS2	ENSG00000122140.6	protein_coding	1255.53	0.284251	0.109594	2.59368	0.00949542	0.126786
ZBTB17	ENSG00000116809.7	protein_coding	1699.31	0.277714	0.1071	2.59303	0.00951343	0.1269
TLR3	ENSG00000164342.8	protein_coding	86.2376	-0.437802	0.168864	-2.59264	0.00952432	0.126912
NOMO3	ENSG00000103226.13	protein_coding	505.498	-0.348308	0.134362	-2.59231	0.0095334	0.126912
TRIOBP	ENSG00000100106.15	protein_coding	1580.2	-0.300231	0.115866	-2.59119	0.00956454	0.1272
EIF3L	ENSG00000100129.13	protein_coding	7453.5	0.237456	0.091716	2.58903	0.00962462	0.127871
SLC22A3	ENSG00000146477.4	protein_coding	796.26	-0.304638	0.117699	-2.58829	0.00964544	0.12802
GPR137B	ENSG00000077585.9	protein_coding	813.717	0.304258	0.117645	2.58625	0.00970259	0.128651
FOXO4	ENSG00000184481.12	protein_coding	1286.02	-0.285715	0.110612	-2.58303	0.00979379	0.129731
RAB3D	ENSG00000105514.3	protein_coding	469.749	-0.337775	0.130791	-2.58255	0.00980722	0.12978
VSTM2L	ENSG00000132821.7	protein_coding	4586.2	-0.30559	0.11842	-2.58055	0.00986418	0.130189
STK38	ENSG00000112079.8	protein_coding	5251.76	0.246036	0.0953259	2.58099	0.00985165	0.130189
MPZL1	ENSG00000197965.7	protein_coding	3976.77	0.253191	0.098132	2.5801	0.00987714	0.130189
ACTN1	ENSG00000072110.9	protein_coding	21119.2	0.261582	0.101374	2.58036	0.00986966	0.130189
PRDM4	ENSG00000110851.7	protein_coding	2509.45	0.27112	0.105105	2.57952	0.0098937	0.130278
ERCC6L	ENSG00000186871.5	protein_coding	97.8167	0.432343	0.167676	2.57845	0.00992453	0.130556
CDK14	ENSG00000058091.12	protein_coding	361.311	0.356574	0.138474	2.57503	0.0100233	0.131725
TMEM135	ENSG00000166575.12	protein_coding	948.772	-0.317347	0.123302	-2.57373	0.0100609	0.131989
AKAP11	ENSG00000023516.7	protein_coding	1602.56	-0.278279	0.108126	-2.57365	0.0100632	0.131989
MEX3C	ENSG00000176624.9	protein_coding	2288.24	0.259573	0.100894	2.57272	0.0100902	0.132083
MMP1	ENSG00000196611.4	protein_coding	26452.4	0.296619	0.115288	2.57285	0.0100865	0.132083
SQSTM1	ENSG00000161011.15	protein_coding	17851.3	-0.25686	0.099869	-2.57197	0.0101123	0.132113
COL13A1	ENSG00000197467.9	protein_coding	19480.6	0.264949	0.10301	2.57206	0.0101096	0.132113
ZNF493	ENSG00000196268.7	protein_coding	194.92	-0.40527	0.157657	-2.57059	0.0101526	0.132192
YWHAG	ENSG00000170027.5	protein_coding	9242.72	0.232334	0.0903932	2.57026	0.0101622	0.132192
NKIRAS2	ENSG00000168256.13	protein_coding	2744.47	0.261263	0.101653	2.57016	0.0101652	0.132192
VARS	ENSG00000204394.8	protein_coding	3622.66	0.265832	0.103434	2.57007	0.0101679	0.132192
ASAP1	ENSG00000153317.10	protein_coding	2049.03	0.269215	0.10474	2.57032	0.0101605	0.132192
CD274	ENSG00000120217.9	protein_coding	320.671	0.370065	0.144038	2.56923	0.0101926	0.132385
PPFIBP2	ENSG00000166387.7	protein_coding	554.986	-0.328065	0.127711	-2.56882	0.0102047	0.132413
VPS8	ENSG00000156931.11	protein_coding	1184.11	-0.29245	0.113922	-2.5671	0.0102554	0.132812
TMC6	ENSG00000141524.11	protein_coding	2066.07	0.282532	0.110058	2.56711	0.010255	0.132812
TAPBPL	ENSG00000139192.7	protein_coding	197.974	-0.40139	0.156436	-2.56585	0.0102924	0.133034
CAMK2G	ENSG00000148660.16	protein_coding	1886.68	-0.263894	0.102839	-2.56608	0.0102855	0.133034
SAP30	ENSG00000164105.3	protein_coding	1034.91	0.289219	0.112758	2.56496	0.0103188	0.133246
GSN	ENSG00000148180.12	protein_coding	17302	0.24729	0.0964929	2.56278	0.0103839	0.133827
ANP32B	ENSG00000136938.8	protein_coding	3684.92	0.258252	0.100758	2.56309	0.0103746	0.133827
SLC16A5	ENSG00000170190.11	protein_coding	590.593	-0.334387	0.130575	-2.56089	0.0104406	0.134039
PPFIA4	ENSG00000143847.11	protein_coding	2620.15	-0.290952	0.113604	-2.56111	0.0104339	0.134039
TSPAN14	ENSG00000108219.10	protein_coding	5781.84	0.241632	0.0943271	2.56164	0.0104178	0.134039
AKT1	ENSG00000142208.11	protein_coding	3904.98	0.259864	0.101461	2.56122	0.0104304	0.134039
ARAP3	ENSG00000120318.11	protein_coding	1710.26	0.278726	0.10892	2.559	0.0104975	0.134641
ARHGAP27	ENSG00000159314.7	protein_coding	3932.37	-0.26415	0.103251	-2.55832	0.0105179	0.134643
ING2	ENSG00000168556.5	protein_coding	684.124	0.316636	0.123756	2.55855	0.010511	0.134643
CNOT6L	ENSG00000138767.8	protein_coding	673.277	-0.320204	0.12523	-2.55693	0.01056	0.135053
SLBP	ENSG00000163950.8	protein_coding	1746.78	0.274471	0.107368	2.55637	0.010577	0.135141
NOTCH3	ENSG00000074181.4	protein_coding	126.141	-0.424755	0.166185	-2.55591	0.0105909	0.13518
FAM167A	ENSG00000154319.10	protein_coding	333.525	-0.37691	0.147484	-2.5556	0.0106004	0.13518
VDAC2	ENSG00000165637.9	protein_coding	6841.4	0.265558	0.10394	2.55491	0.0106216	0.135192
TMEM206	ENSG00000065600.8	protein_coding	616.096	0.318961	0.124842	2.55493	0.0106209	0.135192
CYBRD1	ENSG00000071967.7	protein_coding	3446.89	-0.252568	0.0988997	-2.55377	0.0106562	0.135193
ZFYVE26	ENSG00000072121.11	protein_coding	2158.11	0.269148	0.105364	2.55446	0.0106352	0.135193
PYGL	ENSG00000100504.12	protein_coding	6101.43	0.284022	0.111225	2.55358	0.0106622	0.135193
IL1RAPL1	ENSG00000169306.5	protein_coding	189.087	0.40265	0.157666	2.55381	0.0106552	0.135193
PGD	ENSG00000142657.16	protein_coding	7458.37	0.236988	0.0929165	2.55054	0.0107555	0.136246
KLHDC1	ENSG00000197776.3	protein_coding	118.951	-0.422548	0.165727	-2.54966	0.0107827	0.136462
E2F3	ENSG00000112242.10	protein_coding	2242.25	0.259104	0.101677	2.54829	0.0108251	0.136739
ATN1	ENSG00000111676.10	protein_coding	3451.57	0.26994	0.105917	2.5486	0.0108155	0.136739
CORO1C	ENSG00000110880.6	protein_coding	10074.5	0.243132	0.095435	2.54762	0.0108459	0.136872
RARG	ENSG00000172819.12	protein_coding	1566.08	-0.279329	0.10969	-2.54654	0.0108798	0.13717
FOXJ3	ENSG00000198815.4	protein_coding	2875.2	0.248598	0.0976888	2.5448	0.010934	0.137723
2008-09-01	ENSG00000164402.9	protein_coding	1465.25	-0.27017	0.106184	-2.54436	0.0109479	0.137769
FOXK1	ENSG00000164916.9	protein_coding	2176.31	-0.277658	0.109158	-2.54363	0.0109708	0.137926
CAV1	ENSG00000105974.7	protein_coding	6265.46	0.237628	0.093447	2.54291	0.0109932	0.138078
STX2	ENSG00000111450.9	protein_coding	1064.55	0.294271	0.115792	2.54138	0.0110417	0.138556
SLC10A7	ENSG00000120519.10	protein_coding	217.781	-0.388395	0.152882	-2.54049	0.0110696	0.138776
ANO7P1	ENSG00000237276.4	pseudogene	49.151	-0.420942	0.165757	-2.53952	0.0111006	0.138938
NICN1	ENSG00000145029.7	protein_coding	749.718	-0.308513	0.121504	-2.53912	0.0111131	0.138938
KCTD12	ENSG00000178695.4	protein_coding	4921.26	-0.246452	0.0970628	-2.5391	0.0111138	0.138938
RAB12	ENSG00000206418.3	protein_coding	737.869	-0.315831	0.124434	-2.53815	0.011144	0.139055
HDAC4	ENSG00000068024.12	protein_coding	1224.37	-0.290067	0.114276	-2.5383	0.0111392	0.139055
SOCS3	ENSG00000184557.3	protein_coding	2098.08	-0.258912	0.102033	-2.53753	0.0111636	0.13917
CTH	ENSG00000116761.7	protein_coding	494.442	0.329844	0.130032	2.53664	0.011192	0.139394
YWHAH	ENSG00000128245.10	protein_coding	3183.46	0.247714	0.0977511	2.53413	0.0112727	0.140006
PHACTR4	ENSG00000204138.8	protein_coding	1740.89	0.262474	0.103574	2.53417	0.0112713	0.140006
GPSM1	ENSG00000160360.7	protein_coding	1439.24	0.295513	0.116591	2.53461	0.0112572	0.140006
NEB	ENSG00000183091.15	protein_coding	72.212	-0.4252	0.16784	-2.53336	0.0112975	0.140184
TRIM52	ENSG00000183718.4	protein_coding	224.491	-0.38317	0.151302	-2.53248	0.0113259	0.140275
SERTAD2	ENSG00000179833.4	protein_coding	3330.16	0.25284	0.0998354	2.53257	0.011323	0.140275
DBH-AS1	ENSG00000225756.1	antisense	299.137	-0.370207	0.146258	-2.53118	0.0113678	0.140534
FAHD2A	ENSG00000115042.5	protein_coding	671.784	0.307473	0.121461	2.53146	0.0113588	0.140534
SNRPD1	ENSG00000167088.6	protein_coding	1237.62	0.291354	0.115143	2.53038	0.0113941	0.140727
TATDN2	ENSG00000157014.6	protein_coding	758.2	0.307049	0.121369	2.52988	0.0114102	0.140796
TOMM40L	ENSG00000158882.8	protein_coding	310.381	0.362113	0.143218	2.5284	0.0114583	0.14126
UIMC1	ENSG00000087206.12	protein_coding	943.346	0.288999	0.11435	2.52732	0.0114937	0.141565
TICAM1	ENSG00000127666.8	protein_coding	928.505	0.303298	0.120055	2.52633	0.011526	0.141832
RP11-34A14.3	ENSG00000230928.1	antisense	80.3402	-0.426266	0.168915	-2.52355	0.0116178	0.14283
C6orf106	ENSG00000196821.5	protein_coding	8798.39	0.251879	0.0998422	2.52277	0.0116435	0.143013
SMARCC1	ENSG00000173473.6	protein_coding	5278.59	0.250081	0.0991787	2.52152	0.011685	0.143392
DNAJC6	ENSG00000116675.11	protein_coding	217.615	-0.384535	0.152733	-2.5177	0.0118124	0.144027
ARRDC4	ENSG00000140450.7	protein_coding	268.902	-0.378265	0.150208	-2.51828	0.0117929	0.144027
LPP	ENSG00000145012.8	protein_coding	1382.9	-0.295678	0.117367	-2.51926	0.0117601	0.144027
DKC1	ENSG00000130826.11	protein_coding	1734.99	0.266881	0.105963	2.51864	0.011781	0.144027
PLEKHJ1	ENSG00000104886.5	protein_coding	841.063	0.294183	0.116793	2.51885	0.0117738	0.144027
SGOL2	ENSG00000163535.13	protein_coding	275.016	0.392296	0.155752	2.51873	0.011778	0.144027
CDT1	ENSG00000167513.4	protein_coding	155.755	0.404348	0.160593	2.51785	0.0118075	0.144027
MTMR1	ENSG00000063601.12	protein_coding	1678.74	0.262415	0.104268	2.51674	0.0118446	0.144156
ING1	ENSG00000153487.11	protein_coding	662.553	0.305797	0.121498	2.5169	0.0118392	0.144156
RPL26L1	ENSG00000037241.3	protein_coding	853.62	0.291742	0.115944	2.51623	0.0118617	0.144233
RN7SL2	ENSG00000265150.1	misc_RNA	140.753	-0.411811	0.163828	-2.51367	0.0119481	0.144894
NF1	ENSG00000196712.12	protein_coding	1152.18	-0.288602	0.114814	-2.51366	0.0119487	0.144894
PTPN3	ENSG00000070159.9	protein_coding	705.699	0.307335	0.122247	2.51405	0.0119354	0.144894
NEBL	ENSG00000078114.14	protein_coding	216.025	-0.386771	0.154072	-2.51032	0.012062	0.146101
AMOTL1	ENSG00000166025.13	protein_coding	4785.38	0.237156	0.0944931	2.50977	0.012081	0.146101
SIGMAR1	ENSG00000147955.12	protein_coding	2012.19	0.267866	0.106722	2.50995	0.0120749	0.146101
POLE3	ENSG00000148229.8	protein_coding	1862.93	-0.273074	0.108867	-2.50834	0.0121301	0.146561
ITGB2-AS1	ENSG00000227039.2	antisense	128.215	-0.414546	0.165307	-2.50773	0.0121509	0.14668
ADAMTS14	ENSG00000138316.6	protein_coding	46.9856	0.410881	0.164044	2.5047	0.0122555	0.147808
NFKBIB	ENSG00000104825.12	protein_coding	668.107	0.306687	0.122496	2.50365	0.012292	0.148115
PDK4	ENSG00000004799.7	protein_coding	262.296	-0.404393	0.161548	-2.50323	0.0123064	0.148154
ARHGAP11A	ENSG00000198826.6	protein_coding	290.413	0.389709	0.155706	2.50286	0.0123194	0.148177
APBB1	ENSG00000166313.14	protein_coding	1974.66	-0.25594	0.102295	-2.50196	0.0123507	0.148286
MCM5	ENSG00000100297.11	protein_coding	892.841	0.288625	0.115351	2.50213	0.0123447	0.148286
RAB14	ENSG00000119396.6	protein_coding	3747.83	0.249909	0.0999305	2.50083	0.0123902	0.148627
SELT	ENSG00000198843.8	protein_coding	1742.06	-0.285952	0.114378	-2.50006	0.0124174	0.148666
MICAL2	ENSG00000133816.9	protein_coding	6379.83	0.265847	0.106348	2.49978	0.0124269	0.148666
CYP51A1	ENSG00000001630.11	protein_coding	169.054	0.405014	0.162016	2.49983	0.0124252	0.148666
GMEB1	ENSG00000162419.8	protein_coding	853.23	0.291625	0.116699	2.49895	0.0124562	0.148883
PPM1G	ENSG00000115241.9	protein_coding	4580.28	0.250997	0.100502	2.49745	0.0125092	0.149382
RARA	ENSG00000131759.13	protein_coding	2095.99	0.271752	0.108938	2.49457	0.012611	0.150463
SMPD4	ENSG00000136699.15	protein_coding	1596.45	0.275281	0.110377	2.494	0.0126312	0.15057
EIF2AK4	ENSG00000128829.7	protein_coding	2110.27	0.276509	0.110887	2.49362	0.0126448	0.150597
BMF	ENSG00000104081.9	protein_coding	1144.23	-0.289739	0.116223	-2.49297	0.012668	0.150731
STRA13	ENSG00000169689.10	protein_coding	1031.73	0.281854	0.113073	2.49267	0.0126786	0.150731
TMEM183A	ENSG00000163444.7	protein_coding	3270.66	0.250323	0.100483	2.49118	0.0127319	0.151095
PRRX1	ENSG00000116132.7	protein_coding	144.834	0.404261	0.16227	2.49128	0.0127284	0.151095
ZFP36L1	ENSG00000185650.8	protein_coding	30144.6	0.278026	0.11162	2.49083	0.0127444	0.15111
KLC2	ENSG00000174996.7	protein_coding	2491.29	0.264743	0.106359	2.48915	0.0128049	0.151692
CCNK	ENSG00000090061.13	protein_coding	1636.59	0.263378	0.105831	2.48866	0.0128226	0.151766
AKAP12	ENSG00000131016.12	protein_coding	2836.75	0.284033	0.11422	2.48673	0.0128924	0.152457
FBXO32	ENSG00000156804.3	protein_coding	2349.29	-0.257381	0.103526	-2.48614	0.0129136	0.152573
KPNB1	ENSG00000108424.5	protein_coding	9459.3	0.236974	0.0953679	2.48484	0.0129608	0.152618
IL13RA1	ENSG00000131724.6	protein_coding	2752.35	0.244426	0.0983515	2.48523	0.0129468	0.152618
ARHGAP31	ENSG00000031081.6	protein_coding	1207.07	0.279195	0.112342	2.48522	0.0129473	0.152618
PHF16	ENSG00000102221.9	protein_coding	229.484	0.375171	0.150988	2.48478	0.0129632	0.152618
TOM1	ENSG00000100284.16	protein_coding	1406.39	-0.269234	0.108399	-2.48372	0.0130019	0.152938
CXXC4	ENSG00000168772.9	protein_coding	122.357	-0.413228	0.166456	-2.4825	0.0130463	0.153326
ACTL6A	ENSG00000136518.12	protein_coding	1954.33	0.267281	0.107701	2.48169	0.0130762	0.153407
FAM43A	ENSG00000185112.4	protein_coding	1088.17	0.319533	0.128752	2.48177	0.0130731	0.153407
KCTD20	ENSG00000112078.9	protein_coding	7576.22	0.258949	0.104525	2.4774	0.0132345	0.155127
TAF9B	ENSG00000187325.4	protein_coding	1654.51	-0.269655	0.108888	-2.47646	0.0132693	0.155399
MRPS36	ENSG00000134056.7	protein_coding	957.195	-0.300472	0.121388	-2.47531	0.0133121	0.15549
SERPINB1	ENSG00000021355.8	protein_coding	6816.38	-0.231674	0.0935925	-2.47535	0.0133106	0.15549
CDC123	ENSG00000151465.9	protein_coding	1884.96	0.273829	0.110599	2.47586	0.0132914	0.15549
PSRC1	ENSG00000134222.12	protein_coding	486.192	0.329026	0.132949	2.47483	0.0133299	0.155563
UNC13A	ENSG00000130477.10	protein_coding	113.223	-0.412626	0.166919	-2.47202	0.0134352	0.156651
STOML1	ENSG00000067221.9	protein_coding	287.489	-0.368765	0.149194	-2.47171	0.0134467	0.156651
MEF2D	ENSG00000116604.13	protein_coding	3479.01	-0.254385	0.102979	-2.47025	0.0135019	0.157156
AFAP1L1	ENSG00000157510.9	protein_coding	835.764	-0.295217	0.119586	-2.46865	0.0135623	0.157585
KIF1C	ENSG00000129250.7	protein_coding	5083.53	0.239436	0.0969885	2.46871	0.0135602	0.157585
GOLGA2B	ENSG00000238105.3	pseudogene	164.866	-0.393553	0.15967	-2.4648	0.0137092	0.158546
CYP4V2	ENSG00000145476.11	protein_coding	736.547	-0.297934	0.120885	-2.46461	0.0137163	0.158546
CASC7	ENSG00000259758.1	lincRNA	6518.35	-0.235262	0.0954419	-2.46497	0.0137024	0.158546
TMEM50A	ENSG00000183726.6	protein_coding	4439.16	0.243783	0.0988872	2.46527	0.0136911	0.158546
FKBP4	ENSG00000004478.5	protein_coding	2228.91	0.252346	0.102359	2.46531	0.0136895	0.158546
SENP5	ENSG00000119231.6	protein_coding	1214.81	0.269588	0.109371	2.46488	0.0137059	0.158546
ARL6IP1	ENSG00000170540.10	protein_coding	2913.6	0.276542	0.112291	2.46273	0.0137883	0.159239
RP11-21L23.2	ENSG00000261578.1	sense_overlapping	131.671	-0.402437	0.163467	-2.46189	0.0138208	0.15946
CARD6	ENSG00000132357.9	protein_coding	1155.18	0.272652	0.110761	2.46162	0.0138313	0.15946
TMEM223	ENSG00000168569.7	protein_coding	460.571	-0.322482	0.131022	-2.46128	0.0138442	0.159472
HSPH1	ENSG00000120694.15	protein_coding	4813.24	0.297244	0.120805	2.46053	0.0138732	0.159667
CENPO	ENSG00000138092.6	protein_coding	290.294	0.359549	0.146153	2.4601	0.01389	0.159723
ENPP2	ENSG00000136960.8	protein_coding	78.2579	-0.415315	0.168913	-2.45875	0.013942	0.159908
ITGB3	ENSG00000259207.3	protein_coding	324.24	-0.370512	0.150682	-2.45891	0.0139361	0.159908
KCTD7	ENSG00000243335.4	protein_coding	759.023	-0.293937	0.119534	-2.45903	0.0139314	0.159908
IGBP1	ENSG00000089289.11	protein_coding	2510.34	0.246523	0.100279	2.45837	0.0139569	0.159941
LEPRE1	ENSG00000117385.11	protein_coding	5445.36	0.253718	0.103275	2.45672	0.0140213	0.160323
NAB2	ENSG00000166886.8	protein_coding	2048.35	0.266134	0.108324	2.45683	0.0140169	0.160323
PIGS	ENSG00000087111.16	protein_coding	2050.45	0.270065	0.109935	2.45659	0.0140263	0.160323
FNIP2	ENSG00000052795.8	protein_coding	700.254	-0.306824	0.125002	-2.45455	0.014106	0.160958
NHSL1	ENSG00000135540.7	protein_coding	122.411	0.404877	0.164939	2.45471	0.0141	0.160958
GYG2	ENSG00000056998.14	protein_coding	52.2306	-0.406123	0.165586	-2.45264	0.0141813	0.161088
LINC00641	ENSG00000258441.1	processed_transcript	300.146	-0.373977	0.15246	-2.45295	0.0141688	0.161088
GPAM	ENSG00000119927.9	protein_coding	418.403	-0.350703	0.143006	-2.45237	0.0141918	0.161088
KHDRBS1	ENSG00000121774.13	protein_coding	4892.18	0.232689	0.0948706	2.4527	0.0141789	0.161088
SFXN3	ENSG00000107819.9	protein_coding	7599.7	0.247145	0.100775	2.45245	0.0141889	0.161088
PPIL1	ENSG00000137168.7	protein_coding	1825	0.257322	0.104939	2.45212	0.0142019	0.161088
FAM210A	ENSG00000177150.8	protein_coding	994.25	0.308047	0.12558	2.453	0.014167	0.161088
UBAP2	ENSG00000137073.16	protein_coding	1820.97	0.25761	0.105089	2.45137	0.0142315	0.16115
CSK	ENSG00000103653.12	protein_coding	1705.24	0.267365	0.109066	2.45141	0.0142299	0.16115
DYNC1I2	ENSG00000077380.11	protein_coding	3040.02	0.256808	0.104802	2.45041	0.0142692	0.161166
NR1D1	ENSG00000126368.5	protein_coding	1567.42	0.313917	0.128081	2.45092	0.0142493	0.161166
NEURL1B	ENSG00000214357.4	protein_coding	56.9705	0.40955	0.167127	2.45053	0.0142647	0.161166
CCDC62	ENSG00000130783.9	protein_coding	59.121	-0.40917	0.167231	-2.44674	0.0144156	0.162682
FANCG	ENSG00000221829.5	protein_coding	597.358	0.309005	0.12631	2.44641	0.0144288	0.162693
IFT27	ENSG00000100360.10	protein_coding	421.316	-0.331839	0.135668	-2.44595	0.0144469	0.16276
PSEN1	ENSG00000080815.14	protein_coding	4231.31	0.240378	0.0983006	2.44534	0.0144717	0.162902
COL27A1	ENSG00000196739.10	protein_coding	1209.5	0.29487	0.120606	2.4449	0.014489	0.162959
CYB561	ENSG00000008283.11	protein_coding	3449.31	-0.234612	0.0959782	-2.44443	0.0145082	0.163037
MT2A	ENSG00000125148.6	protein_coding	28051	0.281623	0.115229	2.44403	0.0145241	0.163078
BPHL	ENSG00000137274.8	protein_coding	798.908	-0.287947	0.117915	-2.44198	0.014607	0.163782
CIAO1	ENSG00000144021.2	protein_coding	3185.91	0.236002	0.0966479	2.44187	0.0146114	0.163782
CDH11	ENSG00000140937.9	protein_coding	9855.92	-0.249728	0.102327	-2.44049	0.0146675	0.164273
ACTR3	ENSG00000115091.7	protein_coding	7682.06	0.245655	0.100671	2.44018	0.0146799	0.164275
AGT	ENSG00000135744.7	protein_coding	181.503	-0.387402	0.158848	-2.43883	0.0147349	0.164752
MSL1	ENSG00000188895.7	protein_coding	4485.83	0.229188	0.0939953	2.43829	0.014757	0.16486
APLN	ENSG00000171388.9	protein_coding	151.279	-0.394844	0.162054	-2.4365	0.0148302	0.16554
CD302	ENSG00000241399.2	protein_coding	44.8801	-0.399663	0.164074	-2.43587	0.0148561	0.165552
TRAIP	ENSG00000183763.4	protein_coding	95.7167	0.409871	0.16825	2.43608	0.0148474	0.165552
DAP3	ENSG00000132676.11	protein_coding	2307.8	-0.242874	0.0997857	-2.43396	0.0149348	0.166151
DSN1	ENSG00000149636.11	protein_coding	349.573	0.344445	0.141512	2.43403	0.0149316	0.166151
KIAA0930	ENSG00000100364.14	protein_coding	879.894	0.2856	0.117417	2.43235	0.015001	0.166749
ZNF609	ENSG00000180357.5	protein_coding	2246.57	0.250636	0.103082	2.43141	0.01504	0.167043
ARHGDIB	ENSG00000111348.4	protein_coding	4547.16	0.229063	0.0942396	2.43065	0.0150717	0.167227
TGFA	ENSG00000163235.11	protein_coding	3837.65	0.25555	0.105147	2.43041	0.0150817	0.167227
LRP6	ENSG00000070018.4	protein_coding	1653.64	-0.301831	0.124215	-2.4299	0.0151031	0.167325
WNT7B	ENSG00000188064.5	protein_coding	2120.84	0.27659	0.113858	2.42925	0.0151303	0.167488
MCTP2	ENSG00000140563.10	protein_coding	438.855	-0.321103	0.132362	-2.42594	0.0152687	0.167505
ZBED6	ENSG00000257315.1	protein_coding	870.024	-0.292529	0.120588	-2.42585	0.0152728	0.167505
LNPEP	ENSG00000113441.11	protein_coding	1148.39	-0.26671	0.110002	-2.42459	0.0153258	0.167505
ITGB4	ENSG00000132470.9	protein_coding	54742.2	-0.265078	0.109292	-2.42542	0.0152909	0.167505
TMEM9	ENSG00000116857.12	protein_coding	1414.74	-0.262132	0.108071	-2.42556	0.015285	0.167505
PLAU	ENSG00000122861.11	protein_coding	1705.75	-0.254931	0.104995	-2.42803	0.015181	0.167505
WRNIP1	ENSG00000124535.11	protein_coding	3970.8	0.240783	0.0992692	2.42556	0.0152849	0.167505
E2F4	ENSG00000205250.4	protein_coding	2117.64	0.245616	0.101181	2.4275	0.0152032	0.167505
SEC22B	ENSG00000223380.3	processed_transcript	2231.2	0.255267	0.10529	2.42442	0.0153328	0.167505
NUP85	ENSG00000125450.6	protein_coding	1753.38	0.258912	0.106715	2.4262	0.0152579	0.167505
PLEKHB1	ENSG00000021300.9	protein_coding	1285.29	0.267805	0.110401	2.42575	0.0152768	0.167505
MFSD6	ENSG00000151690.10	protein_coding	1202.17	0.27192	0.112012	2.42759	0.0151994	0.167505
HECA	ENSG00000112406.4	protein_coding	1188.95	0.277454	0.114429	2.42469	0.0153217	0.167505
KIF3B	ENSG00000101350.6	protein_coding	2919.26	0.278901	0.115016	2.42489	0.015313	0.167505
HMGXB4	ENSG00000100281.9	protein_coding	740.513	0.289519	0.119366	2.42548	0.0152881	0.167505
GAS2L3	ENSG00000139354.6	protein_coding	230.862	0.367363	0.151422	2.42609	0.0152624	0.167505
PDIA3P	ENSG00000180867.9	pseudogene	86.166	-0.408509	0.16862	-2.42267	0.0154071	0.167904
RRAS2	ENSG00000133818.8	protein_coding	1551.09	0.294702	0.12162	2.42314	0.0153871	0.167904
KIAA1524	ENSG00000163507.9	protein_coding	269.065	0.38315	0.15815	2.42269	0.0154059	0.167904
FAH	ENSG00000103876.7	protein_coding	2128.47	-0.264523	0.109285	-2.42049	0.0154997	0.168776
OGFRL1	ENSG00000119900.7	protein_coding	2686.02	-0.289375	0.119614	-2.41925	0.0155525	0.169104
ZDHHC6	ENSG00000023041.7	protein_coding	1537.72	0.258315	0.106777	2.41919	0.0155551	0.169104
TMTC3	ENSG00000139324.7	protein_coding	1105.02	-0.320647	0.132583	-2.41846	0.0155865	0.169306
AC132872.1	ENSG00000184551.4	pseudogene	34.5	-0.38241	0.158283	-2.41599	0.0156924	0.169765
LINC00341	ENSG00000229645.4	lincRNA	214.314	-0.378112	0.156499	-2.41607	0.0156891	0.169765
THOC3	ENSG00000051596.5	protein_coding	308.187	-0.354694	0.146829	-2.4157	0.0157051	0.169765
CLIC1	ENSG00000213719.4	protein_coding	38305.1	-0.250791	0.103787	-2.4164	0.0156748	0.169765
MED20	ENSG00000124641.10	protein_coding	2058.29	0.253708	0.105014	2.41595	0.0156942	0.169765
HERPUD2	ENSG00000122557.5	protein_coding	793.745	0.289833	0.119973	2.41583	0.0156996	0.169765
VCP	ENSG00000165280.11	protein_coding	17344.5	-0.223225	0.0924692	-2.41405	0.0157764	0.17026
ADAT1	ENSG00000065457.6	protein_coding	453.483	0.320818	0.132881	2.41433	0.0157644	0.17026
MFSD8	ENSG00000164073.5	protein_coding	413.313	-0.334446	0.138575	-2.41346	0.0158017	0.170395
FBXO27	ENSG00000161243.4	protein_coding	602.333	0.320617	0.132937	2.4118	0.015874	0.170898
RP11-440D17.3	ENSG00000272913.1	lincRNA	227.705	0.37116	0.15389	2.41186	0.0158715	0.170898
SHISA2	ENSG00000180730.4	protein_coding	2739.63	-0.310485	0.128827	-2.41009	0.0159486	0.171425
ARF6	ENSG00000165527.5	protein_coding	7903.66	0.22587	0.0937093	2.41033	0.0159381	0.171425
COL5A1	ENSG00000130635.11	protein_coding	15320.4	0.252903	0.104967	2.40936	0.0159803	0.171628
AP3M2	ENSG00000070718.7	protein_coding	884.478	0.283882	0.117856	2.40872	0.0160086	0.171793
EEF1B2	ENSG00000114942.9	protein_coding	7452.64	0.233173	0.0968299	2.40806	0.0160374	0.171964
XXbac-BPGBPG55C20.2	ENSG00000272316.1	lincRNA	152.105	-0.390323	0.162141	-2.40731	0.0160705	0.172042
RAF1	ENSG00000132155.7	protein_coding	4945.04	0.226168	0.0939396	2.40759	0.0160581	0.172042
ACTR1A	ENSG00000138107.7	protein_coding	8341.64	0.21876	0.0908926	2.4068	0.0160929	0.172143
PLSCR4	ENSG00000114698.10	protein_coding	165.59	-0.383791	0.159519	-2.40592	0.0161316	0.172175
DIABLO	ENSG00000184047.11	protein_coding	339.235	-0.353122	0.146776	-2.40586	0.0161345	0.172175
TNFRSF1A	ENSG00000067182.3	protein_coding	7436.54	-0.226705	0.0942209	-2.4061	0.0161239	0.172175
NOV	ENSG00000136999.4	protein_coding	430.282	-0.333479	0.138634	-2.40546	0.0161519	0.172223
B3GNT2	ENSG00000170340.10	protein_coding	553.86	0.306186	0.12734	2.40447	0.0161958	0.172553
SIK2	ENSG00000170145.4	protein_coding	1680.68	0.25093	0.104393	2.40371	0.0162296	0.172646
CASP6	ENSG00000138794.5	protein_coding	928.63	0.282791	0.117648	2.40369	0.0162304	0.172646
WLS	ENSG00000116729.9	protein_coding	10891.9	0.260001	0.108237	2.40215	0.0162989	0.173235
KIAA1429	ENSG00000164944.7	protein_coding	2093.7	-0.259693	0.108156	-2.4011	0.0163458	0.173596
THRAP3	ENSG00000054118.9	protein_coding	6657.36	0.227888	0.0949578	2.39989	0.0164001	0.17402
RHPN1	ENSG00000158106.8	protein_coding	1317.59	0.280734	0.116991	2.39963	0.0164119	0.17402
PHF17	ENSG00000077684.11	protein_coding	864.494	-0.297423	0.124037	-2.39785	0.0164917	0.174437
SMURF2	ENSG00000108854.11	protein_coding	4335.66	-0.237521	0.0990513	-2.39796	0.0164869	0.174437
CSNK2A1	ENSG00000101266.12	protein_coding	5099.2	0.22913	0.0955667	2.39759	0.0165034	0.174437
PARP1	ENSG00000143799.8	protein_coding	3543.54	0.232401	0.0969107	2.39809	0.0164808	0.174437
ASH1L	ENSG00000116539.6	protein_coding	2304.28	-0.274513	0.114538	-2.39669	0.0165438	0.174587
WDR47	ENSG00000085433.11	protein_coding	1209.64	0.267417	0.111567	2.39692	0.0165336	0.174587
NFIB	ENSG00000147862.10	protein_coding	439.09	-0.337505	0.140871	-2.39584	0.0165822	0.174854
AGPAT3	ENSG00000160216.14	protein_coding	2212.55	-0.244287	0.102046	-2.39388	0.0166712	0.175266
PAM	ENSG00000145730.16	protein_coding	13730.2	0.216448	0.0904196	2.39382	0.0166738	0.175266
PDLIM2	ENSG00000120913.19	protein_coding	269.893	0.35615	0.148766	2.39404	0.0166641	0.175266
FAM171A2	ENSG00000161682.10	protein_coding	348.345	0.362437	0.151397	2.39396	0.0166678	0.175266
KCNK1	ENSG00000135750.10	protein_coding	423.717	0.345993	0.144562	2.39339	0.0166933	0.175332
UFC1	ENSG00000143222.7	protein_coding	2031.22	0.249633	0.104371	2.39179	0.0167665	0.175962
GART	ENSG00000159131.12	protein_coding	2802.02	0.237473	0.09932	2.39099	0.016803	0.176207
SNX30	ENSG00000148158.12	protein_coding	1706.54	0.251241	0.105098	2.39054	0.0168237	0.176285
TRRAP	ENSG00000196367.8	protein_coding	3102.29	-0.255057	0.106713	-2.39013	0.0168426	0.176345
EYA4	ENSG00000112319.13	protein_coding	112.403	-0.397002	0.166233	-2.38822	0.0169301	0.177122
TCHP	ENSG00000139437.13	protein_coding	879.781	0.276247	0.115795	2.38565	0.0170489	0.178225
EIF3A	ENSG00000107581.8	protein_coding	11653.2	-0.233406	0.0978555	-2.38521	0.0170692	0.178297
NEK1	ENSG00000137601.11	protein_coding	377.178	-0.327748	0.137463	-2.38426	0.0171135	0.17859
GDF11	ENSG00000135414.5	protein_coding	426.91	0.317112	0.133015	2.38404	0.017124	0.17859
CTD-2368P22.1	ENSG00000176593.3	protein_coding	254.292	-0.354786	0.148941	-2.38206	0.017216	0.179409
RBM43	ENSG00000184898.6	protein_coding	180.988	-0.377197	0.158392	-2.38141	0.0172465	0.179587
PABPC4	ENSG00000090621.9	protein_coding	3920.63	0.234041	0.0983127	2.38058	0.0172853	0.179851
FAM210B	ENSG00000124098.9	protein_coding	2058.9	0.24237	0.101829	2.38016	0.0173051	0.179916
VASP	ENSG00000125753.9	protein_coding	6729.08	0.227078	0.0954289	2.37955	0.0173336	0.179932
ANLN	ENSG00000011426.6	protein_coding	805.975	0.330889	0.13904	2.37982	0.0173212	0.179932
FAM136A	ENSG00000035141.3	protein_coding	1646.01	0.250717	0.105391	2.37893	0.0173631	0.179958
YARS	ENSG00000134684.6	protein_coding	4523.5	0.25252	0.106145	2.37901	0.017359	0.179958
SLC35D2	ENSG00000130958.7	protein_coding	1356.3	0.267148	0.112392	2.37694	0.0174571	0.180652
CCNE2	ENSG00000175305.12	protein_coding	89.4603	0.401336	0.168826	2.37722	0.0174439	0.180652
2006-03-01	ENSG00000145495.10	protein_coding	6079.06	-0.221861	0.0933847	-2.37577	0.0175122	0.180801
STX18	ENSG00000168818.5	protein_coding	1924.02	0.242469	0.102042	2.37616	0.0174937	0.180801
TAF13	ENSG00000197780.5	protein_coding	769.565	0.290179	0.122133	2.37593	0.0175049	0.180801
ZNF175	ENSG00000105497.3	protein_coding	1105.03	-0.26486	0.111525	-2.3749	0.0175538	0.181091
AP1S3	ENSG00000152056.12	protein_coding	188.131	-0.372942	0.157111	-2.37374	0.0176089	0.181322
KDM1A	ENSG00000004487.11	protein_coding	4511.98	0.223141	0.0939906	2.37408	0.0175929	0.181322
CENPL	ENSG00000120334.11	protein_coding	156.362	0.392945	0.16555	2.37357	0.017617	0.181322
TEX10	ENSG00000136891.9	protein_coding	1797.24	0.260588	0.109803	2.37324	0.0176326	0.181343
ZBTB2	ENSG00000181472.4	protein_coding	589.361	0.298903	0.126134	2.36973	0.0178012	0.182935
HLA-DRB1	ENSG00000196126.6	protein_coding	2292.99	-0.238543	0.100785	-2.36684	0.0179407	0.184227
NUS1	ENSG00000153989.7	protein_coding	2000.8	-0.256124	0.108235	-2.36636	0.017964	0.184321
JMJD6	ENSG00000070495.10	protein_coding	1878.14	0.248747	0.10513	2.36608	0.0179775	0.184321
PCYT1A	ENSG00000161217.7	protein_coding	2896.57	0.231194	0.0977743	2.36457	0.018051	0.184933
MST1	ENSG00000173531.11	protein_coding	372.197	-0.335616	0.142053	-2.3626	0.0181471	0.185774
PEBP1	ENSG00000089220.4	protein_coding	7181.78	0.220537	0.093479	2.35922	0.0183135	0.187334
GCH1	ENSG00000131979.14	protein_coding	401.804	0.326646	0.138487	2.35868	0.0183403	0.187464
MPV17L2	ENSG00000254858.5	protein_coding	790.401	0.280526	0.119003	2.35729	0.0184088	0.188021
MPDU1	ENSG00000129255.10	protein_coding	1617.2	-0.251397	0.10669	-2.35632	0.0184569	0.188223
BRIP1	ENSG00000136492.4	protein_coding	87.0566	0.397739	0.168782	2.35652	0.0184469	0.188223
USP44	ENSG00000136014.7	protein_coding	118.889	-0.389528	0.165487	-2.35383	0.018581	0.188989
PATL2	ENSG00000229474.2	protein_coding	37.8538	-0.3775	0.160359	-2.35409	0.0185683	0.188989
CXorf23	ENSG00000173681.12	protein_coding	318.777	-0.334915	0.142294	-2.35368	0.0185886	0.188989
C6orf132	ENSG00000188112.4	protein_coding	650.317	-0.298159	0.126649	-2.35421	0.0185621	0.188989
EPB41L4A	ENSG00000129595.8	protein_coding	122.019	0.389265	0.165422	2.35316	0.0186146	0.189109
CAPN8	ENSG00000203697.7	protein_coding	155.363	0.377168	0.160311	2.35272	0.0186364	0.189187
TDG	ENSG00000139372.10	protein_coding	1767.6	0.267954	0.113935	2.3518	0.0186826	0.189511
TNPO3	ENSG00000064419.9	protein_coding	1409.41	0.278968	0.118666	2.35087	0.0187298	0.189845
EIF2B5	ENSG00000145191.7	protein_coding	3049.66	0.231782	0.0986284	2.35005	0.0187707	0.190049
CSNK1A1	ENSG00000113712.12	protein_coding	3096.2	0.245285	0.104381	2.3499	0.0187784	0.190049
UQCRC1	ENSG00000010256.6	protein_coding	6126.81	0.227682	0.0969737	2.34788	0.0188807	0.19065
RFTN1	ENSG00000131378.9	protein_coding	1489.21	0.258823	0.110234	2.34795	0.0188771	0.19065
TTF2	ENSG00000116830.7	protein_coding	184.817	0.380112	0.161876	2.34817	0.0188658	0.19065
LIG4	ENSG00000174405.9	protein_coding	538.218	-0.309182	0.131719	-2.34729	0.0189106	0.190808
ZPLD1	ENSG00000170044.4	protein_coding	36.0375	0.373527	0.159201	2.34625	0.0189631	0.191194
ANXA11	ENSG00000122359.13	protein_coding	7663.02	-0.215533	0.0919009	-2.34527	0.0190133	0.191429
DAB2IP	ENSG00000136848.12	protein_coding	2984.5	0.259146	0.110499	2.34523	0.0190152	0.191429
PNP	ENSG00000198805.7	protein_coding	2370.58	0.273044	0.116461	2.34452	0.0190518	0.191653
MYCBP	ENSG00000214114.4	protein_coding	313.715	-0.335392	0.143152	-2.34291	0.0191341	0.192191
GINS2	ENSG00000131153.4	protein_coding	84.0615	0.395709	0.168893	2.34295	0.019132	0.192191
OSBPL6	ENSG00000079156.12	protein_coding	138.296	0.380716	0.162517	2.34262	0.019149	0.192196
SNHG16	ENSG00000163597.10	processed_transcript	849.915	0.298733	0.127555	2.342	0.0191807	0.192369
LUZP1	ENSG00000169641.9	protein_coding	7799.93	0.219276	0.0936941	2.34034	0.0192663	0.193083
TAP1	ENSG00000168394.9	protein_coding	3057.15	-0.234026	0.100013	-2.33996	0.0192857	0.193132
HIGD1A	ENSG00000181061.9	protein_coding	1656.03	-0.277658	0.118741	-2.33835	0.019369	0.19382
HRH1	ENSG00000196639.6	protein_coding	2052.24	0.238108	0.101842	2.33801	0.0193867	0.193852
DHX58	ENSG00000108771.8	protein_coding	279.363	-0.345604	0.147905	-2.33667	0.0194565	0.194405
FLVCR2	ENSG00000119686.5	protein_coding	122.885	-0.385367	0.164942	-2.33638	0.0194717	0.194411
C11orf72	ENSG00000184224.3	protein_coding	111.306	-0.388559	0.166354	-2.33574	0.0195046	0.194594
NDUFS5	ENSG00000168653.6	protein_coding	6230.19	0.216815	0.092917	2.33343	0.0196258	0.195073
RBMX	ENSG00000147274.10	protein_coding	3461.43	0.236664	0.101419	2.33353	0.0196203	0.195073
PPP1R15B	ENSG00000158615.8	protein_coding	2111.77	0.241895	0.103638	2.33404	0.0195936	0.195073
FMNL3	ENSG00000161791.9	protein_coding	1761.86	0.26734	0.114563	2.33356	0.0196186	0.195073
DIMT1	ENSG00000086189.5	protein_coding	1367.76	0.279927	0.119956	2.33357	0.0196181	0.195073
ZNF148	ENSG00000163848.14	protein_coding	1193.9	-0.27082	0.116088	-2.33288	0.0196543	0.195211
KIF7	ENSG00000166813.10	protein_coding	190.942	-0.372343	0.159674	-2.3319	0.019706	0.195578
USP33	ENSG00000077254.10	protein_coding	2238.22	-0.260808	0.111857	-2.33162	0.0197206	0.195578
UBE2L3	ENSG00000185651.10	protein_coding	3550.88	0.223976	0.0960955	2.33076	0.019766	0.195883
CDCP1	ENSG00000163814.3	protein_coding	36220.3	-0.241186	0.103509	-2.33009	0.0198014	0.196043
DFNA5	ENSG00000105928.9	protein_coding	2354.58	0.244695	0.105036	2.32962	0.0198263	0.196043
CD44	ENSG00000026508.12	protein_coding	15649.6	0.244779	0.105065	2.32979	0.0198172	0.196043
CCDC86	ENSG00000110104.7	protein_coding	516.302	-0.297776	0.127842	-2.32924	0.0198463	0.196096
FERMT2	ENSG00000073712.9	protein_coding	4963.44	0.233139	0.100126	2.32844	0.0198887	0.196224
ZNF664	ENSG00000179195.11	protein_coding	3423.93	0.240402	0.103243	2.32851	0.0198849	0.196224
SFTA1P	ENSG00000225383.2	lincRNA	262.617	0.357684	0.153687	2.32736	0.0199462	0.196647
PI4KB	ENSG00000143393.12	protein_coding	3600.14	0.225922	0.097103	2.32662	0.0199854	0.196887
TMEM136	ENSG00000181264.4	protein_coding	298.879	-0.332824	0.143081	-2.32611	0.0200125	0.197008
MASTL	ENSG00000120539.10	protein_coding	262.85	0.342753	0.147377	2.3257	0.0200348	0.197082
ALPK1	ENSG00000073331.13	protein_coding	288.265	-0.34079	0.14665	-2.32384	0.0201342	0.197914
AKR1C1	ENSG00000187134.8	protein_coding	111.74	-0.385788	0.166135	-2.32213	0.0202258	0.198523
SPRY4	ENSG00000187678.8	protein_coding	24412.7	0.23561	0.101453	2.32236	0.0202136	0.198523
KIF23	ENSG00000137807.9	protein_coding	221.006	0.358945	0.154597	2.32181	0.0202433	0.198548
PCDH1	ENSG00000156453.9	protein_coding	232.616	-0.36175	0.155913	-2.32021	0.0203296	0.199248
ABLIM2	ENSG00000163995.14	protein_coding	101.98	-0.389043	0.167741	-2.3193	0.0203786	0.199402
MKNK2	ENSG00000099875.10	protein_coding	15209	-0.226022	0.0974705	-2.31887	0.020402	0.199402
HMGN2	ENSG00000198830.6	protein_coding	3994.21	0.246086	0.106126	2.31882	0.0204051	0.199402
CHAF1B	ENSG00000159259.7	protein_coding	108.217	0.386103	0.166477	2.31926	0.0203811	0.199402
IPMK	ENSG00000151151.5	protein_coding	854.26	-0.29497	0.12736	-2.31604	0.0205561	0.200666
LMO7	ENSG00000136153.15	protein_coding	5594.27	0.221799	0.0957729	2.31589	0.0205645	0.200666
RCAN3	ENSG00000117602.7	protein_coding	801.243	-0.271559	0.117342	-2.31426	0.0206536	0.201388
HEBP2	ENSG00000051620.6	protein_coding	3533.16	0.232581	0.10055	2.31308	0.0207184	0.201725
FRAT2	ENSG00000181274.5	protein_coding	564.007	0.290318	0.125506	2.31318	0.0207128	0.201725
DOCK10	ENSG00000135905.14	protein_coding	437.946	0.321748	0.139145	2.31232	0.0207599	0.201982
ASB9	ENSG00000102048.11	protein_coding	237.044	0.3471	0.15015	2.31169	0.0207949	0.202175
TONSL	ENSG00000160949.12	protein_coding	686.614	0.283652	0.122765	2.31053	0.0208589	0.202648
CACNA2D4	ENSG00000151062.10	protein_coding	786.963	-0.278816	0.120693	-2.31013	0.020881	0.202716
FAM120AOS	ENSG00000188938.11	protein_coding	858.841	0.274082	0.118703	2.30897	0.0209454	0.203194
MEF2A	ENSG00000068305.13	protein_coding	3539.49	-0.223571	0.096851	-2.3084	0.0209767	0.203349
HAS3	ENSG00000103044.6	protein_coding	784.341	0.277988	0.120444	2.30804	0.0209969	0.203397
SLU7	ENSG00000164609.5	protein_coding	1969.78	-0.256107	0.111114	-2.3049	0.0211721	0.204827
NFKB1	ENSG00000109320.7	protein_coding	1998.93	0.235729	0.102285	2.30462	0.0211877	0.204827
SGOL1	ENSG00000129810.10	protein_coding	47.1488	0.380656	0.165175	2.30457	0.0211906	0.204827
SOCS5	ENSG00000171150.7	protein_coding	2217.23	0.252038	0.109383	2.30418	0.0212127	0.204892
HLA-F	ENSG00000204642.9	protein_coding	83.0048	-0.388644	0.168793	-2.30249	0.0213075	0.205362
LSMEM1	ENSG00000181016.5	protein_coding	60.2612	-0.386233	0.167735	-2.30263	0.0212994	0.205362
DCP1A	ENSG00000162290.12	protein_coding	963.116	0.2612	0.113426	2.30282	0.0212888	0.205362
TJP3	ENSG00000105289.10	protein_coding	73.4204	-0.388666	0.168838	-2.30201	0.0213346	0.205475
IRF2	ENSG00000168310.6	protein_coding	1128.43	-0.255557	0.111081	-2.30064	0.0214118	0.20607
C9orf9	ENSG00000165698.11	protein_coding	162.046	-0.367884	0.159951	-2.29998	0.0214493	0.206133
SNRPD3	ENSG00000100028.7	protein_coding	1854.37	0.245618	0.106786	2.30009	0.0214429	0.206133
ZNF317	ENSG00000130803.10	protein_coding	2255.86	0.233245	0.101447	2.29917	0.0214952	0.206425
PRSS23	ENSG00000150687.7	protein_coding	12484	-0.25451	0.110778	-2.29748	0.0215911	0.206768
PLXNA1	ENSG00000114554.7	protein_coding	17452	-0.241892	0.105278	-2.29765	0.0215815	0.206768
BTN2A1	ENSG00000112763.11	protein_coding	2913.03	0.224133	0.0975311	2.29807	0.021558	0.206768
GAR1	ENSG00000109534.12	protein_coding	717.439	0.282074	0.122777	2.29745	0.0215929	0.206768
HSPA1A	ENSG00000204389.8	protein_coding	1462.18	0.255872	0.111468	2.29547	0.021706	0.20759
MYH15	ENSG00000144821.5	protein_coding	106.133	0.385541	0.167962	2.29541	0.0217099	0.20759
HEXIM1	ENSG00000186834.2	protein_coding	6520.55	-0.220308	0.0960114	-2.2946	0.0217558	0.207881
CHMP3	ENSG00000115561.10	protein_coding	3309.14	0.220525	0.096159	2.29334	0.0218285	0.208357
ZNF473	ENSG00000142528.11	protein_coding	431.133	0.317767	0.13857	2.29319	0.021837	0.208357
FAM60A	ENSG00000139146.9	protein_coding	1612.85	0.253529	0.110599	2.29232	0.0218872	0.208688
ZDBF2	ENSG00000204186.3	protein_coding	444.592	-0.31217	0.136256	-2.29106	0.02196	0.208822
TRIM16L	ENSG00000108448.16	protein_coding	475.196	-0.306948	0.133946	-2.29158	0.0219301	0.208822
ZNF432	ENSG00000256087.2	protein_coding	678.07	-0.283721	0.123843	-2.29098	0.0219643	0.208822
HNRNPC	ENSG00000092199.13	protein_coding	25648.1	0.227034	0.0991104	2.29072	0.0219796	0.208822
CLTB	ENSG00000175416.8	protein_coding	3346.04	0.245752	0.107264	2.29109	0.0219579	0.208822
MAOA	ENSG00000189221.5	protein_coding	703.38	-0.303684	0.132604	-2.29017	0.0220115	0.208976
UBE2E3	ENSG00000170035.11	protein_coding	8516.58	0.230206	0.100574	2.28892	0.022084	0.209366
FAM89A	ENSG00000182118.5	protein_coding	258.698	0.338182	0.147746	2.28895	0.0220825	0.209366
CDK2	ENSG00000123374.6	protein_coding	1167.55	0.2779	0.121432	2.28851	0.0221076	0.209441
RP11-600F24.7	ENSG00000260285.1	antisense	113.079	-0.380902	0.166503	-2.28766	0.0221574	0.209698
COPG2	ENSG00000158623.10	protein_coding	481.712	0.304153	0.132962	2.28751	0.0221662	0.209698
PPAP2C	ENSG00000141934.5	protein_coding	2009.12	0.247716	0.108337	2.28652	0.0222238	0.210095
DOCK11	ENSG00000147251.11	protein_coding	612.375	-0.298884	0.130734	-2.28619	0.022243	0.210127
PRX	ENSG00000105227.10	protein_coding	731.154	-0.278922	0.122029	-2.2857	0.0222717	0.210249
STAP2	ENSG00000178078.7	protein_coding	990.885	0.259546	0.113583	2.28508	0.0223079	0.210442
EFTUD1	ENSG00000140598.9	protein_coding	1289.79	0.248166	0.10869	2.28325	0.0224158	0.211311
BCL6	ENSG00000113916.13	protein_coding	3703.04	-0.225204	0.0987231	-2.28117	0.0225385	0.212167
CSRP1	ENSG00000159176.9	protein_coding	9195.82	0.22346	0.0979527	2.28131	0.0225301	0.212167
PTDSS1	ENSG00000156471.8	protein_coding	3298.24	0.221576	0.0972092	2.27937	0.0226448	0.213018
MT1E	ENSG00000169715.10	protein_coding	2480.63	-0.379707	0.166621	-2.27887	0.0226747	0.213137
UHRF1BP1L	ENSG00000111647.8	protein_coding	821.723	-0.282439	0.123951	-2.27862	0.0226895	0.213137
MSN	ENSG00000147065.12	protein_coding	74249	0.244264	0.107253	2.27746	0.0227586	0.213636
GAS6-AS2	ENSG00000272695.1	lincRNA	125.466	-0.380046	0.167038	-2.2752	0.0228936	0.214753
CST7	ENSG00000077984.4	protein_coding	183.522	-0.359811	0.158245	-2.27377	0.02298	0.215411
ALDH1L1	ENSG00000144908.9	protein_coding	113.215	-0.380038	0.167241	-2.2724	0.0230626	0.216033
GRAMD1A	ENSG00000089351.10	protein_coding	2437.12	0.244667	0.107682	2.27213	0.0230789	0.216035
ZC4H2	ENSG00000126970.11	protein_coding	706.177	-0.276737	0.121828	-2.27153	0.0231149	0.216218
WDR76	ENSG00000092470.7	protein_coding	101.279	0.379955	0.167288	2.27127	0.0231309	0.216218
ABLIM3	ENSG00000173210.15	protein_coding	5088.88	-0.23762	0.104647	-2.27068	0.0231661	0.216244
BZW2	ENSG00000136261.10	protein_coding	1887.3	0.234837	0.103418	2.27076	0.0231616	0.216244
HN1	ENSG00000189159.11	protein_coding	4150.09	0.227335	0.1002	2.26881	0.02328	0.216926
ERCC1	ENSG00000012061.11	protein_coding	3091.92	0.229365	0.101101	2.26868	0.0232879	0.216926
CRTC3	ENSG00000140577.11	protein_coding	956.198	0.269591	0.118811	2.26907	0.0232641	0.216926
CARD14	ENSG00000141527.12	protein_coding	55.9065	-0.378505	0.16698	-2.26677	0.0234041	0.217708
LAMA4	ENSG00000112769.14	protein_coding	846.462	-0.27455	0.12112	-2.26677	0.0234046	0.217708
LTN1	ENSG00000198862.9	protein_coding	1561.2	-0.260823	0.115086	-2.26633	0.0234314	0.217806
RP11-159D12.2	ENSG00000264112.1	lincRNA	717.577	-0.271856	0.12003	-2.26491	0.0235183	0.218317
VPS41	ENSG00000006715.11	protein_coding	1211.87	-0.257252	0.113582	-2.2649	0.0235191	0.218317
TMC8	ENSG00000167895.10	protein_coding	208.539	0.346707	0.153119	2.26429	0.0235561	0.218508
LUC7L3	ENSG00000108848.11	protein_coding	5535.95	-0.226683	0.10013	-2.26389	0.0235811	0.218588
RALGAPA1	ENSG00000174373.11	protein_coding	733.8	-0.299858	0.132493	-2.2632	0.0236232	0.218826
PITPNB	ENSG00000180957.13	protein_coding	1632.17	-0.236536	0.104538	-2.26269	0.023655	0.21886
TSR1	ENSG00000167721.6	protein_coding	1969.57	0.239214	0.105725	2.26261	0.0236596	0.21886
STRN3	ENSG00000196792.7	protein_coding	935.721	-0.268323	0.118655	-2.26136	0.0237368	0.219291
C2CD3	ENSG00000168014.12	protein_coding	968.828	0.279117	0.123431	2.26132	0.0237392	0.219291
PPP3CB	ENSG00000107758.11	protein_coding	3005.36	0.222223	0.0983596	2.25929	0.0238652	0.220303
LINC00313	ENSG00000185186.4	lincRNA	50.2687	-0.375057	0.16605	-2.2587	0.0239021	0.220491
ARSJ	ENSG00000180801.11	protein_coding	1020.92	0.255875	0.113303	2.25832	0.0239258	0.220557
TRBV30	ENSG00000237254.2	TR_V_gene	62.6206	0.379714	0.168205	2.25744	0.0239804	0.220908
TICRR	ENSG00000140534.9	protein_coding	132.849	0.368453	0.163323	2.25597	0.0240725	0.221603
BAK1	ENSG00000030110.8	protein_coding	1906.75	0.234719	0.104068	2.25544	0.0241056	0.221754
C4A	ENSG00000244731.3	protein_coding	101.739	-0.378535	0.167897	-2.25457	0.0241604	0.221953
CALU	ENSG00000128595.12	protein_coding	8583.12	0.210083	0.0931758	2.25469	0.0241525	0.221953
ZBTB25	ENSG00000089775.7	protein_coding	442.67	-0.297344	0.131974	-2.25305	0.0242559	0.222524
CPEB4	ENSG00000113742.8	protein_coding	1389.38	-0.252669	0.112142	-2.25311	0.0242524	0.222524
GDPD1	ENSG00000153982.6	protein_coding	169.211	0.356354	0.158185	2.25277	0.0242737	0.222534
GPR68	ENSG00000119714.6	protein_coding	1562.14	-0.246367	0.109437	-2.25123	0.0243713	0.222969
SGSM2	ENSG00000141258.8	protein_coding	3150.17	-0.244567	0.108624	-2.25151	0.0243536	0.222969
DRAM1	ENSG00000136048.9	protein_coding	1623.44	0.249445	0.110795	2.2514	0.02436	0.222969
RNH1	ENSG00000023191.12	protein_coding	9400.52	0.223821	0.099442	2.25077	0.0244	0.223079
RTN4	ENSG00000115310.13	protein_coding	26383.1	0.201155	0.0894152	2.24967	0.0244697	0.223562
HPS1	ENSG00000107521.14	protein_coding	2820.43	-0.222226	0.0988026	-2.24919	0.0245005	0.223691
CTDSPL2	ENSG00000137770.9	protein_coding	823.877	-0.283471	0.126135	-2.24736	0.0246168	0.224334
NEIL1	ENSG00000140398.9	protein_coding	612.959	-0.277594	0.123566	-2.24652	0.0246708	0.224334
PTPN21	ENSG00000070778.8	protein_coding	1572.36	-0.237639	0.105772	-2.24672	0.0246582	0.224334
EAF1	ENSG00000144597.9	protein_coding	729.193	0.26922	0.119839	2.24651	0.0246715	0.224334
ICOSLG	ENSG00000160223.12	protein_coding	696.676	0.27552	0.122587	2.24755	0.024605	0.224334
RNF126	ENSG00000070423.13	protein_coding	1073.42	0.299217	0.133193	2.2465	0.0246718	0.224334
PTRHD1	ENSG00000184924.5	protein_coding	495.845	-0.292496	0.130241	-2.24581	0.0247164	0.224586
C8orf37	ENSG00000156172.5	protein_coding	129.577	-0.368653	0.164197	-2.24518	0.0247563	0.224695
KIF1B	ENSG00000054523.12	protein_coding	2503.68	0.236174	0.105196	2.24509	0.0247621	0.224695
CD14	ENSG00000170458.9	protein_coding	128.395	-0.3711	0.165335	-2.24453	0.0247984	0.224871
PPAP2B	ENSG00000162407.8	protein_coding	1295.99	0.242169	0.107967	2.24298	0.0248978	0.22562
POM121	ENSG00000196313.7	protein_coding	1302.4	0.259776	0.115881	2.24175	0.0249778	0.226037
ADRA1B	ENSG00000170214.3	protein_coding	318.635	0.32783	0.14623	2.24188	0.0249691	0.226037
PCBP3	ENSG00000183570.12	protein_coding	409.009	-0.310899	0.138773	-2.24034	0.0250687	0.226597
MARCKS	ENSG00000155130.5	protein_coding	11251.4	0.219101	0.0978015	2.24027	0.0250737	0.226597
GLDN	ENSG00000186417.9	protein_coding	71.5982	-0.378064	0.168892	-2.2385	0.0251886	0.226909
SNRK	ENSG00000163788.9	protein_coding	654.424	-0.277557	0.123983	-2.23866	0.0251778	0.226909
CCDC115	ENSG00000136710.5	protein_coding	1074.11	-0.254076	0.113507	-2.23843	0.0251932	0.226909
YWHAB	ENSG00000166913.8	protein_coding	12362.5	0.206972	0.0924624	2.23845	0.0251919	0.226909
CCT4	ENSG00000115484.10	protein_coding	5925.17	0.227649	0.101681	2.23884	0.0251661	0.226909
RP11-122K13.12	ENSG00000235245.1	antisense	1686.93	-0.284862	0.127306	-2.23762	0.0252458	0.227091
ATP11A	ENSG00000068650.14	protein_coding	1618.85	0.261513	0.116872	2.23759	0.0252475	0.227091
TTC18	ENSG00000156042.13	protein_coding	76.3699	-0.377773	0.168916	-2.23646	0.0253218	0.227606
ARSA	ENSG00000100299.13	protein_coding	412.096	-0.308048	0.137761	-2.23611	0.0253445	0.227657
PPP1R37	ENSG00000104866.6	protein_coding	1459.75	0.260571	0.116567	2.23537	0.025393	0.227939
CNOT3	ENSG00000088038.13	protein_coding	1696.08	0.243153	0.108809	2.23468	0.0254381	0.22819
CCDC149	ENSG00000181982.13	protein_coding	833.172	0.268916	0.120395	2.23361	0.0255089	0.228671
PBXIP1	ENSG00000163346.12	protein_coding	12434.6	0.208933	0.0935645	2.23304	0.0255463	0.228699
MGAT5	ENSG00000152127.4	protein_coding	3074.36	0.229393	0.102724	2.23311	0.0255417	0.228699
VMAC	ENSG00000187650.3	protein_coding	147.743	-0.360093	0.161305	-2.23237	0.0255907	0.228943
GNAS	ENSG00000087460.19	protein_coding	47678.6	0.209172	0.0937364	2.2315	0.0256483	0.229305
UFL1	ENSG00000014123.9	protein_coding	974.924	-0.276176	0.123782	-2.23115	0.0256714	0.229357
ARSD	ENSG00000006756.11	protein_coding	416.178	-0.312274	0.139989	-2.23071	0.0257004	0.22938
MFAP2	ENSG00000117122.9	protein_coding	2528.32	0.229775	0.103011	2.23059	0.0257083	0.22938
SSTR2	ENSG00000180616.4	protein_coding	46.0106	-0.367253	0.164664	-2.23031	0.0257267	0.229391
CCDC144B	ENSG00000154874.10	pseudogene	210.831	-0.348508	0.156361	-2.22887	0.0258228	0.230039
GOPC	ENSG00000047932.9	protein_coding	1165.68	-0.273577	0.122766	-2.22844	0.0258511	0.230039
CXorf38	ENSG00000185753.8	protein_coding	474.951	0.290068	0.130154	2.22866	0.0258367	0.230039
CABLES1	ENSG00000134508.8	protein_coding	377.247	-0.305056	0.137	-2.22669	0.0259681	0.230925
STT3B	ENSG00000163527.5	protein_coding	11961.4	-0.226797	0.101893	-2.22582	0.026026	0.231286
RAB5B	ENSG00000111540.11	protein_coding	1392.98	0.249433	0.112112	2.22487	0.0260902	0.231686
PCDHB2	ENSG00000112852.4	protein_coding	317.089	0.314804	0.141508	2.22464	0.0261057	0.231686
HIATL1	ENSG00000148110.11	protein_coding	2745.51	0.227373	0.10226	2.22348	0.0261836	0.232223
LYST	ENSG00000143669.9	protein_coding	565.733	-0.285942	0.128655	-2.22256	0.0262458	0.232454
SREK1IP1	ENSG00000153006.10	protein_coding	826.238	-0.269405	0.121255	-2.2218	0.0262968	0.232454
SLC2A4RG	ENSG00000125520.9	protein_coding	2956.47	-0.236176	0.106295	-2.22189	0.0262908	0.232454
CNBP	ENSG00000169714.12	protein_coding	9431.53	0.210306	0.0946123	2.22282	0.0262279	0.232454
ZBTB5	ENSG00000168795.4	protein_coding	1601.14	0.236648	0.106504	2.22196	0.0262861	0.232454
NFE2	ENSG00000123405.9	protein_coding	39.5893	-0.357213	0.160807	-2.22138	0.0263253	0.232552
MRPS30	ENSG00000112996.5	protein_coding	1216.7	0.246946	0.11124	2.21995	0.026422	0.232992
NRBF2	ENSG00000148572.10	protein_coding	1180.25	0.252598	0.113774	2.22018	0.0264066	0.232992
NSMAF	ENSG00000035681.3	protein_coding	745.963	0.263372	0.118643	2.21987	0.0264276	0.232992
YTHDF2	ENSG00000198492.10	protein_coding	3656.54	0.21982	0.099068	2.21888	0.0264948	0.23323
RAP1GDS1	ENSG00000138698.10	protein_coding	2598.4	0.221143	0.099666	2.21885	0.0264972	0.23323
EXOSC10	ENSG00000171824.9	protein_coding	2342.97	0.221814	0.0999863	2.21845	0.0265245	0.23323
VRK1	ENSG00000100749.3	protein_coding	437.49	0.320775	0.144579	2.21867	0.0265089	0.23323
TMEM189	ENSG00000240849.6	protein_coding	1397.85	0.237174	0.10702	2.21616	0.0266807	0.234449
RPN2	ENSG00000118705.12	protein_coding	18910.2	0.196769	0.088815	2.21549	0.0267262	0.234695
C12orf4	ENSG00000047621.7	protein_coding	272.086	-0.32379	0.146174	-2.2151	0.0267533	0.234778
ZBTB10	ENSG00000205189.7	protein_coding	748.367	-0.269779	0.121809	-2.21477	0.0267759	0.23479
B3GALT6	ENSG00000176022.3	protein_coding	1029.73	0.268059	0.121044	2.21457	0.0267899	0.23479
CHST6	ENSG00000183196.4	protein_coding	35.7942	-0.352522	0.159249	-2.21365	0.0268532	0.23519
HMGCR	ENSG00000113161.11	protein_coding	3941.18	0.217279	0.0982016	2.21259	0.0269263	0.235661
C9orf78	ENSG00000136819.10	protein_coding	1445.43	0.248282	0.112238	2.2121	0.02696	0.235661
LYPLA1	ENSG00000120992.13	protein_coding	2644.77	0.258047	0.116641	2.21232	0.0269449	0.235661
STX11	ENSG00000135604.9	protein_coding	65.2379	0.372155	0.168282	2.2115	0.0270012	0.235867
TBCEL	ENSG00000154114.8	protein_coding	830.893	-0.284662	0.128763	-2.21075	0.0270533	0.236167
ZBTB43	ENSG00000169155.5	protein_coding	805.116	0.266193	0.120447	2.21004	0.0271027	0.236444
MAPRE1	ENSG00000101367.8	protein_coding	6822.57	0.212328	0.0961161	2.20908	0.0271689	0.236867
BLM	ENSG00000197299.6	protein_coding	46.3181	0.362552	0.164247	2.20736	0.0272889	0.237758
ARL10	ENSG00000175414.6	protein_coding	347.492	-0.307917	0.13955	-2.20651	0.0273485	0.238121
USP4	ENSG00000114316.8	protein_coding	2702.31	0.227587	0.103193	2.20545	0.0274228	0.238612
ZC3H6	ENSG00000188177.9	protein_coding	78.2762	-0.372381	0.16891	-2.20462	0.0274811	0.238808
SVIL	ENSG00000197321.10	protein_coding	6376.54	0.232298	0.105367	2.20465	0.0274787	0.238808
PRIM1	ENSG00000198056.9	protein_coding	49.144	0.365525	0.165846	2.204	0.0275242	0.239027
MBOAT2	ENSG00000143797.7	protein_coding	1417.59	-0.247464	0.112293	-2.20374	0.0275423	0.239028
RAN	ENSG00000132341.7	protein_coding	9521.76	0.208772	0.0947951	2.20235	0.0276409	0.239728
ACO1	ENSG00000122729.14	protein_coding	4124.98	0.219641	0.0997872	2.20109	0.0277296	0.240341
SEPSECS	ENSG00000109618.7	protein_coding	317.975	-0.316869	0.144015	-2.20025	0.0277891	0.240544
DNAL4	ENSG00000100246.8	protein_coding	396.405	-0.297824	0.135348	-2.20044	0.027776	0.240544
APOL6	ENSG00000221963.5	protein_coding	516.901	-0.299543	0.136224	-2.1989	0.0278849	0.240903
SDAD1	ENSG00000198301.7	protein_coding	1030.46	-0.271906	0.123684	-2.1984	0.0279208	0.240903
AHCYL1	ENSG00000168710.13	protein_coding	4161.36	0.207464	0.09435	2.19888	0.0278864	0.240903
POGK	ENSG00000143157.7	protein_coding	2493.65	0.221358	0.10068	2.19863	0.0279044	0.240903
MTF1	ENSG00000188786.9	protein_coding	1063.35	0.25379	0.115401	2.19921	0.0278631	0.240903
HS3ST3B1	ENSG00000125430.4	protein_coding	602.825	0.272912	0.124166	2.19797	0.0279515	0.241011
INPP5F	ENSG00000198825.7	protein_coding	1237.25	0.239908	0.109209	2.19678	0.0280358	0.241583
LSM4	ENSG00000130520.6	protein_coding	4804.84	0.21364	0.09729	2.19591	0.0280985	0.241654
CBX2	ENSG00000173894.6	protein_coding	1181.62	0.259208	0.118025	2.19622	0.028076	0.241654
FAM102B	ENSG00000162636.11	protein_coding	934.748	0.259483	0.118154	2.19615	0.0280814	0.241654
HSF1	ENSG00000185122.6	protein_coding	4127.05	0.238324	0.108574	2.19503	0.0281615	0.24204
PLAGL2	ENSG00000126003.6	protein_coding	1803.68	0.241038	0.10985	2.19426	0.0282168	0.242359
SDC1	ENSG00000115884.6	protein_coding	2137.47	-0.226654	0.10333	-2.19349	0.0282717	0.242573
DPP3	ENSG00000254986.3	protein_coding	2435.03	0.217902	0.0993441	2.19341	0.0282781	0.242573
ABCC1	ENSG00000103222.14	protein_coding	2698.8	0.233139	0.10638	2.19156	0.0284112	0.243559
RPL4	ENSG00000174444.10	protein_coding	29269.8	0.200013	0.0912825	2.19114	0.0284415	0.243662
RFWD3	ENSG00000168411.9	protein_coding	1242.64	0.241347	0.110205	2.18999	0.0285248	0.244218
PPIF	ENSG00000108179.9	protein_coding	2670.28	0.217824	0.0994927	2.18934	0.0285718	0.244464
SETD6	ENSG00000103037.7	protein_coding	237.529	-0.331268	0.151328	-2.18907	0.0285915	0.244476
INTS3	ENSG00000143624.9	protein_coding	4532.38	-0.220393	0.100733	-2.1879	0.0286768	0.245048
PBX1	ENSG00000185630.14	protein_coding	584.468	-0.278487	0.127315	-2.18739	0.0287142	0.245054
STK4	ENSG00000101109.7	protein_coding	2396.57	0.218887	0.100066	2.18744	0.0287106	0.245054
GRK6	ENSG00000198055.6	protein_coding	1270.55	0.253931	0.116105	2.18709	0.0287362	0.245084
KIAA0947	ENSG00000164151.7	protein_coding	2399.68	-0.237649	0.108685	-2.18659	0.0287728	0.24524
SLC26A2	ENSG00000155850.7	protein_coding	804.923	-0.296958	0.135836	-2.18616	0.0288043	0.245351
SYCP2	ENSG00000196074.8	protein_coding	71.5773	-0.368921	0.168854	-2.18486	0.0288991	0.245803
NPR1	ENSG00000169418.9	protein_coding	120.292	-0.365551	0.16734	-2.18448	0.0289271	0.245803
PGAM1	ENSG00000171314.8	protein_coding	31561.8	0.209039	0.0957021	2.18427	0.0289424	0.245803
RHEB	ENSG00000106615.5	protein_coding	3618.48	0.2322	0.106282	2.18475	0.0289074	0.245803
CENPH	ENSG00000153044.5	protein_coding	65.5778	0.366197	0.167659	2.18417	0.0289495	0.245803
GTF3C4	ENSG00000125484.7	protein_coding	2023.89	0.231627	0.106069	2.18375	0.0289805	0.24591
CTSL	ENSG00000135047.10	protein_coding	24482.5	-0.207635	0.095104	-2.18324	0.0290181	0.246073
ICMT	ENSG00000116237.11	protein_coding	4975.01	0.210146	0.0962864	2.18251	0.0290718	0.246334
SKA1	ENSG00000154839.5	protein_coding	78.213	0.368576	0.168891	2.18232	0.0290858	0.246334
CHI3L2	ENSG00000064886.9	protein_coding	113.5	-0.36282	0.166301	-2.1817	0.0291316	0.246565
SYTL4	ENSG00000102362.11	protein_coding	521.615	0.282307	0.129432	2.18112	0.0291748	0.246774
TRAM2	ENSG00000065308.4	protein_coding	11220.7	0.210232	0.0963985	2.18086	0.0291935	0.246776
REEP4	ENSG00000168476.7	protein_coding	455.316	0.300375	0.137903	2.17815	0.0293945	0.24823
KIF11	ENSG00000138160.4	protein_coding	356.756	0.32562	0.149501	2.17804	0.0294027	0.24823
PLOD2	ENSG00000152952.7	protein_coding	8750.54	-0.242931	0.111572	-2.17735	0.0294547	0.248275
C6orf62	ENSG00000112308.8	protein_coding	6944.39	-0.217285	0.0997866	-2.1775	0.0294431	0.248275
ARHGAP19	ENSG00000213390.6	protein_coding	281.265	0.319077	0.146552	2.17722	0.0294639	0.248275
FLII	ENSG00000177731.11	protein_coding	12360.3	0.222769	0.10241	2.17528	0.0296091	0.249254
ATG2A	ENSG00000110046.8	protein_coding	2651.9	0.241916	0.111217	2.17517	0.0296174	0.249254
PHF12	ENSG00000109118.9	protein_coding	2034.06	-0.232842	0.1071	-2.17406	0.0297008	0.249361
ARPC5	ENSG00000162704.11	protein_coding	9308.7	0.219951	0.101155	2.1744	0.0296754	0.249361
COG2	ENSG00000135775.9	protein_coding	936.794	0.250973	0.11541	2.17462	0.0296586	0.249361
KAZN	ENSG00000189337.11	protein_coding	830.836	0.25671	0.118082	2.174	0.029705	0.249361
PARM1	ENSG00000169116.7	protein_coding	618.028	-0.268586	0.123588	-2.17324	0.0297624	0.249686
RP3-368A4.5	ENSG00000271430.1	sense_intronic	220.103	-0.330583	0.152196	-2.17209	0.0298492	0.250257
PSMA1	ENSG00000129084.13	protein_coding	546.215	-0.286398	0.132039	-2.16904	0.0300798	0.252032
C1QBP	ENSG00000108561.4	protein_coding	2567.23	0.221958	0.102361	2.16838	0.0301298	0.252292
RP4-555D20.4	ENSG00000272121.1	lincRNA	57.3338	-0.363529	0.167696	-2.16778	0.0301751	0.252411
RNF130	ENSG00000113269.9	protein_coding	1678.48	-0.232572	0.10729	-2.1677	0.0301818	0.252411
GARS	ENSG00000106105.9	protein_coding	4323.44	0.21218	0.0979019	2.16727	0.0302144	0.252457
SH3BP5	ENSG00000131370.11	protein_coding	94.8672	0.365295	0.168562	2.16713	0.0302252	0.252457
HNRNPU-AS1	ENSG00000188206.5	antisense	170.109	-0.345579	0.159663	-2.16443	0.0304316	0.253546
SPTLC2	ENSG00000100596.2	protein_coding	1819.57	0.231548	0.106967	2.16467	0.0304132	0.253546
PLXNB1	ENSG00000164050.8	protein_coding	1215.19	0.272308	0.12579	2.16478	0.0304048	0.253546
HAUS8	ENSG00000131351.10	protein_coding	257.914	0.321796	0.148651	2.16478	0.0304044	0.253546
TMEM123	ENSG00000152558.10	protein_coding	13422.5	0.229334	0.105981	2.16392	0.0304707	0.253714
ACSS1	ENSG00000154930.10	protein_coding	345.435	-0.310766	0.143656	-2.16327	0.0305206	0.25397
PSMD5-AS1	ENSG00000226752.3	antisense	574.029	-0.270952	0.125283	-2.16271	0.0305636	0.253985
ZNF318	ENSG00000171467.11	protein_coding	1144.19	-0.266944	0.123436	-2.16261	0.030571	0.253985
PDCL	ENSG00000136940.9	protein_coding	1107.19	0.245214	0.113394	2.1625	0.0305795	0.253985
ARHGAP29	ENSG00000137962.8	protein_coding	8712.33	0.228406	0.105647	2.16198	0.0306197	0.254161
ANGPT1	ENSG00000154188.5	protein_coding	414.888	-0.311836	0.144304	-2.16097	0.0306979	0.254493
C14orf79	ENSG00000140104.9	protein_coding	494.268	-0.280037	0.129576	-2.16118	0.0306815	0.254493
PITHD1	ENSG00000057757.5	protein_coding	1996.9	0.230078	0.106487	2.16061	0.0307252	0.254561
CD96	ENSG00000153283.8	protein_coding	338.906	0.307365	0.142325	2.1596	0.030804	0.255056
PALLD	ENSG00000129116.13	protein_coding	3573.09	0.211165	0.0978214	2.15868	0.0308747	0.255483
ZNF486	ENSG00000256229.3	protein_coding	225.354	0.329573	0.152776	2.15723	0.0309874	0.256256
XAF1	ENSG00000132530.12	protein_coding	98.0458	-0.362454	0.168054	-2.15678	0.0310232	0.256393
SLC4A11	ENSG00000088836.8	protein_coding	2032.3	0.241189	0.111952	2.15441	0.0312084	0.257764
YWHAQ	ENSG00000134308.9	protein_coding	16790.6	0.200657	0.0931745	2.15356	0.0312743	0.258149
TMEM218	ENSG00000150433.5	protein_coding	598.803	-0.269723	0.125268	-2.15317	0.0313056	0.258247
ABCC6	ENSG00000091262.10	protein_coding	63.3944	-0.3625	0.168403	-2.15258	0.0313518	0.258468
CNP	ENSG00000173786.12	protein_coding	4337.55	0.206908	0.0962208	2.15034	0.0315282	0.259762
KCTD5	ENSG00000167977.4	protein_coding	2061.31	0.228699	0.106393	2.14956	0.03159	0.260111
KDM5B	ENSG00000117139.12	protein_coding	7168.43	0.202883	0.0944301	2.1485	0.0316737	0.260219
ELAC2	ENSG00000006744.14	protein_coding	2868.67	0.217066	0.101036	2.14841	0.0316813	0.260219
PRPS2	ENSG00000101911.8	protein_coding	508.713	0.278298	0.129518	2.14872	0.0316567	0.260219
IL6	ENSG00000136244.7	protein_coding	514.813	0.278813	0.129754	2.14879	0.0316514	0.260219
SCARA3	ENSG00000168077.9	protein_coding	105.545	0.358193	0.166762	2.14794	0.0317187	0.260367
UBE2L6	ENSG00000156587.11	protein_coding	2319.62	-0.216232	0.100691	-2.14747	0.0317555	0.260508
PSMB7	ENSG00000136930.8	protein_coding	6422.68	0.201421	0.0938197	2.14689	0.0318019	0.260729
UBA2	ENSG00000126261.8	protein_coding	3613.38	0.219419	0.102267	2.14555	0.0319089	0.261446
UBIAD1	ENSG00000120942.9	protein_coding	650.472	-0.264196	0.123188	-2.14466	0.0319799	0.261866
CCDC114	ENSG00000105479.11	protein_coding	449.248	-0.291462	0.135919	-2.14438	0.0320025	0.26189
EMB	ENSG00000170571.7	protein_coding	408.477	-0.300461	0.140159	-2.14372	0.0320553	0.262162
MCCC1	ENSG00000078070.7	protein_coding	933.536	0.245377	0.114517	2.14271	0.0321363	0.26251
UBR7	ENSG00000012963.9	protein_coding	951.187	0.249522	0.116452	2.1427	0.0321372	0.26251
C1orf123	ENSG00000162384.9	protein_coding	1476.03	-0.238762	0.111547	-2.14047	0.0323172	0.263818
AMT	ENSG00000145020.10	protein_coding	639.982	-0.262773	0.122804	-2.13978	0.0323726	0.264
TFDP2	ENSG00000114126.13	protein_coding	1463.28	0.230365	0.107675	2.13945	0.0323988	0.264
C14orf37	ENSG00000139971.11	protein_coding	410.906	0.291417	0.136203	2.13957	0.0323896	0.264
KARS	ENSG00000065427.10	protein_coding	4158.67	0.208994	0.0976978	2.13919	0.0324202	0.264013
DMBT1	ENSG00000187908.11	protein_coding	782.749	-0.26415	0.123503	-2.13882	0.0324504	0.264097
XPO5	ENSG00000124571.13	protein_coding	3725.76	0.207067	0.0968267	2.13853	0.0324736	0.264125
POLR3A	ENSG00000148606.8	protein_coding	2329.63	0.218221	0.102055	2.13826	0.0324958	0.264145
HMGA2	ENSG00000149948.9	protein_coding	5424.34	-0.201406	0.0942528	-2.13687	0.0326088	0.264438
YWHAE	ENSG00000108953.12	protein_coding	25862.8	0.202681	0.0948564	2.13672	0.032621	0.264438
DLST	ENSG00000119689.10	protein_coding	6476.15	0.202909	0.0949733	2.13648	0.0326401	0.264438
FXR1	ENSG00000114416.13	protein_coding	4547.45	0.212769	0.0995875	2.13651	0.032638	0.264438
SLC29A1	ENSG00000112759.12	protein_coding	12319.3	0.22619	0.105873	2.13643	0.0326442	0.264438
SCAF4	ENSG00000156304.10	protein_coding	1112.68	0.241389	0.112991	2.13635	0.0326509	0.264438
VPS4A	ENSG00000132612.14	protein_coding	1714.49	0.227312	0.10643	2.13578	0.0326975	0.264655
SPTBN1	ENSG00000115306.11	protein_coding	26606.9	0.211662	0.0991793	2.13413	0.0328321	0.265584
FAM213B	ENSG00000157870.10	protein_coding	1575.02	-0.228928	0.107432	-2.13091	0.0330968	0.267077
SRSF4	ENSG00000116350.11	protein_coding	4755.42	0.215138	0.100944	2.13127	0.0330671	0.267077
ATG9A	ENSG00000198925.6	protein_coding	3856.85	0.222016	0.104181	2.13106	0.0330841	0.267077
KNSTRN	ENSG00000128944.9	protein_coding	248.626	0.330328	0.15498	2.13143	0.033054	0.267077
ANXA7	ENSG00000138279.11	protein_coding	3802.48	0.206381	0.0969507	2.12872	0.0332775	0.268373
DYNLL2	ENSG00000264364.2	protein_coding	4072.3	-0.207785	0.0976228	-2.12844	0.0333003	0.268394
RNPC3	ENSG00000185946.11	protein_coding	524.071	-0.27664	0.130012	-2.1278	0.0333538	0.268639
SRSF3	ENSG00000112081.12	protein_coding	7037.5	0.211223	0.0993087	2.12693	0.0334258	0.268639
CERS2	ENSG00000143418.15	protein_coding	6139.14	0.21274	0.100025	2.12686	0.0334314	0.268639
ZSWIM4	ENSG00000132003.5	protein_coding	1542.8	0.250096	0.117557	2.12744	0.0333835	0.268639
RPSAP52	ENSG00000241749.3	pseudogene	287.64	0.31129	0.146333	2.12727	0.033398	0.268639
PTPRU	ENSG00000060656.15	protein_coding	7949.04	-0.229817	0.108094	-2.12608	0.0334965	0.269001
IRGQ	ENSG00000167378.4	protein_coding	1696.84	-0.224166	0.105485	-2.1251	0.0335784	0.269394
RPS24	ENSG00000138326.14	protein_coding	17339	0.201419	0.0947852	2.12501	0.0335858	0.269394
CCDC117	ENSG00000159873.5	protein_coding	625.18	-0.268671	0.126461	-2.12455	0.0336245	0.269541
ZNF746	ENSG00000181220.11	protein_coding	707.883	0.264155	0.124379	2.12379	0.033688	0.269889
MYEOV	ENSG00000172927.3	protein_coding	3546.47	0.235908	0.111103	2.12332	0.0337269	0.269917
FOSL1	ENSG00000175592.4	protein_coding	5710.87	0.241842	0.113901	2.12326	0.0337321	0.269917
AAGAB	ENSG00000103591.8	protein_coding	990.356	0.244445	0.115165	2.12256	0.033791	0.270226
ADAM28	ENSG00000042980.8	protein_coding	148.385	-0.344059	0.162129	-2.12213	0.0338266	0.270349
C22orf39	ENSG00000242259.4	protein_coding	333.734	0.299614	0.141235	2.12139	0.0338891	0.270687
CEP97	ENSG00000182504.6	protein_coding	360.856	-0.29959	0.141297	-2.12028	0.0339822	0.271268
H2AFY	ENSG00000113648.12	protein_coding	5528.98	0.203781	0.0961305	2.11984	0.0340199	0.271305
RAD54L2	ENSG00000164080.9	protein_coding	1095.94	0.240402	0.113411	2.11975	0.0340276	0.271305
NUDCD1	ENSG00000120526.6	protein_coding	1504.65	0.26223	0.123751	2.11903	0.0340883	0.271627
OSCP1	ENSG00000116885.14	protein_coding	187.985	-0.329849	0.155718	-2.11825	0.0341538	0.271825
ZNF780A	ENSG00000197782.10	protein_coding	323.197	-0.300124	0.14168	-2.11833	0.0341475	0.271825
UBE2A	ENSG00000077721.11	protein_coding	3697.52	0.213542	0.100859	2.11724	0.0342392	0.272341
LARP4	ENSG00000161813.16	protein_coding	1056.75	-0.258652	0.122204	-2.11655	0.0342977	0.272644
SETBP1	ENSG00000152217.12	protein_coding	666.903	0.261064	0.123432	2.11504	0.0344262	0.273502
RPIA	ENSG00000153574.8	protein_coding	505.945	0.277005	0.130995	2.11463	0.0344619	0.273623
PLD1	ENSG00000075651.11	protein_coding	1398.33	-0.237767	0.112458	-2.11427	0.034492	0.2737
PER3	ENSG00000049246.10	protein_coding	340.309	-0.304604	0.144099	-2.11385	0.0345281	0.273823
XRCC6	ENSG00000196419.8	protein_coding	11942.3	0.202573	0.0958435	2.11358	0.0345511	0.273843
ASNS	ENSG00000070669.12	protein_coding	1144.28	0.240969	0.114037	2.11308	0.0345941	0.273858
ECT2	ENSG00000114346.9	protein_coding	2687.99	0.242702	0.114848	2.11325	0.0345791	0.273858
MTHFD2	ENSG00000065911.7	protein_coding	425.227	0.28813	0.13642	2.11207	0.0346802	0.274377
AZIN1	ENSG00000155096.9	protein_coding	4159.83	0.211914	0.100376	2.11121	0.0347546	0.27464
PTPRCAP	ENSG00000213402.2	protein_coding	57.3009	0.353911	0.167618	2.11142	0.0347365	0.27464
SLC2A1	ENSG00000117394.15	protein_coding	32380.2	0.240948	0.114192	2.11002	0.0348566	0.275283
TNPO2	ENSG00000105576.11	protein_coding	7872.37	0.199701	0.0947066	2.10863	0.0349762	0.2759
RFC2	ENSG00000049541.6	protein_coding	570.677	0.268668	0.127412	2.10865	0.0349749	0.2759
THAP6	ENSG00000174796.8	protein_coding	246.428	-0.325535	0.154406	-2.1083	0.0350049	0.275916
NFKBIE	ENSG00000146232.10	protein_coding	1729.18	0.228616	0.108445	2.10813	0.0350196	0.275916
L3MBTL1	ENSG00000185513.10	protein_coding	342.729	-0.296885	0.140883	-2.10731	0.0350907	0.276313
XPO6	ENSG00000169180.7	protein_coding	3056.75	0.2131	0.101147	2.10684	0.0351313	0.27647
ZHX1	ENSG00000165156.10	protein_coding	690.567	-0.264634	0.125678	-2.10565	0.0352348	0.277121
AC137932.6	ENSG00000261253.1	antisense	601.666	-0.278172	0.132286	-2.1028	0.0354829	0.277944
GNPDA2	ENSG00000163281.7	protein_coding	731.987	-0.258221	0.12289	-2.10124	0.0356196	0.277944
NIPSNAP3A	ENSG00000136783.9	protein_coding	1197.76	-0.250886	0.119399	-2.10124	0.0356201	0.277944
FAM45A	ENSG00000119979.11	protein_coding	1523.46	-0.228739	0.108819	-2.10202	0.0355514	0.277944
EGLN1	ENSG00000135766.8	protein_coding	3600.61	0.201305	0.095757	2.10225	0.0355318	0.277944
MAPK1	ENSG00000100030.10	protein_coding	3531.48	0.202432	0.0962318	2.10358	0.0354149	0.277944
MYL6	ENSG00000092841.14	protein_coding	17007	0.202714	0.0963636	2.10364	0.0354102	0.277944
RHOBTB3	ENSG00000164292.8	protein_coding	2218.6	0.216828	0.10318	2.10145	0.0356017	0.277944
RNF34	ENSG00000170633.12	protein_coding	1734.65	0.218103	0.103816	2.10087	0.035652	0.277944
HADH	ENSG00000138796.11	protein_coding	1330.51	0.227879	0.108407	2.10208	0.0355465	0.277944
MTHFD1L	ENSG00000120254.11	protein_coding	1597.99	0.227885	0.108466	2.10099	0.035642	0.277944
TBL1X	ENSG00000101849.11	protein_coding	1275.54	0.236581	0.112518	2.1026	0.0355007	0.277944
ISG20	ENSG00000172183.10	protein_coding	673.787	0.25578	0.121683	2.10202	0.0355518	0.277944
ULBP2	ENSG00000131015.4	protein_coding	476.771	0.278721	0.132562	2.10257	0.0355037	0.277944
ZNF586	ENSG00000083828.11	protein_coding	132.111	0.344193	0.163646	2.10328	0.0354409	0.277944
ZFP36L2	ENSG00000152518.5	protein_coding	1684.12	0.257634	0.12265	2.10057	0.0356786	0.277989
RP4-717I23.3	ENSG00000223745.3	processed_transcript	488.313	-0.283421	0.135014	-2.0992	0.0357997	0.278191
NFX1	ENSG00000086102.14	protein_coding	1460.03	0.223528	0.106461	2.09962	0.0357624	0.278191
GATAD1	ENSG00000157259.6	protein_coding	599.543	0.266236	0.126834	2.09909	0.0358088	0.278191
URB2	ENSG00000135763.5	protein_coding	531.056	0.267878	0.127563	2.09997	0.0357317	0.278191
GLYCTK	ENSG00000168237.13	protein_coding	104.777	0.351629	0.167513	2.09911	0.035807	0.278191
RGS10	ENSG00000148908.10	protein_coding	2009.65	0.230293	0.109768	2.09799	0.035906	0.278621
CD83	ENSG00000112149.5	protein_coding	412.091	0.282309	0.134549	2.09818	0.035889	0.278621
CCDC34	ENSG00000109881.12	protein_coding	221.227	0.320081	0.152583	2.09775	0.0359273	0.278624
ENPP4	ENSG00000001561.6	protein_coding	818.158	-0.270691	0.129081	-2.09707	0.0359875	0.278767
SRP9	ENSG00000143742.8	protein_coding	5563.79	0.242772	0.115761	2.09719	0.0359767	0.278767
UBE2W	ENSG00000104343.15	protein_coding	744.897	-0.285892	0.136439	-2.09538	0.0361372	0.279765
DNAJA2	ENSG00000069345.7	protein_coding	2344.86	0.219736	0.104879	2.09513	0.0361596	0.279776
PHKA1	ENSG00000067177.10	protein_coding	816.699	-0.246272	0.117575	-2.0946	0.0362068	0.279978
SH3GL1	ENSG00000141985.5	protein_coding	3444.54	0.219133	0.104649	2.09398	0.0362617	0.280241
HK1	ENSG00000156515.17	protein_coding	12896	0.20034	0.0956951	2.09353	0.0363021	0.2803
FAM213A	ENSG00000122378.9	protein_coding	2381.9	0.217568	0.103929	2.09342	0.0363115	0.2803
BTBD10	ENSG00000148925.6	protein_coding	1311.85	0.228577	0.109203	2.09314	0.0363366	0.280332
ZFAND1	ENSG00000104231.6	protein_coding	947.009	-0.255118	0.121933	-2.09228	0.0364131	0.280598
ODF2	ENSG00000136811.12	protein_coding	1664.55	0.219447	0.104881	2.09235	0.0364073	0.280598
CNPY3	ENSG00000137161.12	protein_coding	4580.75	0.209498	0.10015	2.09183	0.0364533	0.280745
IMPACT	ENSG00000154059.5	protein_coding	428.229	-0.278453	0.133193	-2.09059	0.0365644	0.281248
MLH3	ENSG00000119684.11	protein_coding	545.505	-0.268164	0.128295	-2.09022	0.036598	0.281248
KIAA0355	ENSG00000166398.8	protein_coding	2168.44	0.219585	0.105056	2.09017	0.0366029	0.281248
POLR2D	ENSG00000144231.6	protein_coding	499.303	0.274335	0.131209	2.09083	0.0365435	0.281248
HERC5	ENSG00000138646.4	protein_coding	564.268	0.273161	0.130725	2.08958	0.0366555	0.281489
USP49	ENSG00000164663.9	protein_coding	853.108	-0.262813	0.125804	-2.08906	0.0367021	0.281619
TMEM158	ENSG00000249992.1	protein_coding	7477.43	0.236464	0.113199	2.08892	0.0367145	0.281619
FOLR1	ENSG00000110195.7	protein_coding	131.776	-0.34326	0.164424	-2.08765	0.036829	0.282335
NPTXR	ENSG00000221890.2	protein_coding	292.883	-0.304718	0.145982	-2.08736	0.0368553	0.282374
PVRL3	ENSG00000177707.6	protein_coding	2649.09	0.236995	0.113602	2.08619	0.0369614	0.283024
FBXL14	ENSG00000171823.6	protein_coding	382.698	0.294024	0.141024	2.08492	0.0370765	0.283743
FAM168B	ENSG00000152102.13	protein_coding	6171.83	0.192198	0.0922095	2.08436	0.0371274	0.283968
SLAIN2	ENSG00000109171.10	protein_coding	2615.44	0.211055	0.101268	2.08413	0.0371485	0.283968
ZNF516	ENSG00000101493.6	protein_coding	954.059	0.244169	0.11719	2.08352	0.0372039	0.284228
KNTC1	ENSG00000184445.7	protein_coding	594.737	0.2735	0.131311	2.08284	0.0372654	0.284535
RBM3	ENSG00000102317.13	protein_coding	6065.36	-0.196808	0.0945203	-2.08218	0.0373264	0.284838
HAGH	ENSG00000063854.8	protein_coding	1188.8	0.239048	0.114833	2.08171	0.0373692	0.285001
IPO7	ENSG00000205339.5	protein_coding	7125.01	0.204214	0.0982005	2.07956	0.0375659	0.286338
STAU1	ENSG00000124214.15	protein_coding	7791.27	0.191177	0.0919595	2.07892	0.0376246	0.286622
TRIM9	ENSG00000100505.9	protein_coding	255.94	-0.312475	0.15034	-2.07845	0.037668	0.286625
RBM26	ENSG00000139746.11	protein_coding	2020.98	-0.216915	0.104357	-2.07858	0.0376561	0.286625
TGFB3	ENSG00000119699.3	protein_coding	126.436	-0.341007	0.164383	-2.07446	0.0380366	0.287022
CTD-2303H24.2	ENSG00000273018.1	processed_transcript	188.672	-0.326826	0.157504	-2.07503	0.0379839	0.287022
LCMT2	ENSG00000168806.6	protein_coding	197.07	-0.322122	0.155166	-2.07599	0.037895	0.287022
SAMD9L	ENSG00000177409.7	protein_coding	397.784	-0.296733	0.142863	-2.07705	0.0377969	0.287022
SLC39A11	ENSG00000133195.7	protein_coding	382.084	-0.283012	0.136251	-2.07713	0.0377893	0.287022
DTWD1	ENSG00000104047.10	protein_coding	583.382	-0.273126	0.131536	-2.07644	0.0378531	0.287022
SELM	ENSG00000198832.6	protein_coding	539.828	-0.270714	0.130362	-2.07663	0.037836	0.287022
SH3GLB1	ENSG00000097033.10	protein_coding	4550.36	-0.210883	0.101511	-2.07745	0.0377601	0.287022
ERP29	ENSG00000089248.6	protein_coding	7547.68	0.194236	0.0936235	2.07465	0.0380192	0.287022
PSMD7	ENSG00000103035.6	protein_coding	1911.91	0.215968	0.104094	2.07474	0.0380103	0.287022
C8orf33	ENSG00000182307.8	protein_coding	2174.68	0.220683	0.106354	2.07498	0.0379887	0.287022
PDHA1	ENSG00000131828.9	protein_coding	1351.2	0.222297	0.107162	2.07439	0.0380429	0.287022
GIT1	ENSG00000108262.11	protein_coding	2801.75	0.222651	0.107316	2.07472	0.0380123	0.287022
TSC22D2	ENSG00000196428.8	protein_coding	652.101	0.258229	0.1244	2.0758	0.0379126	0.287022
TNFSF9	ENSG00000125657.3	protein_coding	405.278	0.28633	0.137878	2.07668	0.0378307	0.287022
TOR1B	ENSG00000136816.11	protein_coding	2145.34	0.22871	0.110268	2.07412	0.0380681	0.287049
MAPKAP1	ENSG00000119487.12	protein_coding	4983.81	0.203169	0.0980044	2.07306	0.0381667	0.28763
DCXR	ENSG00000169738.3	protein_coding	732.316	0.256043	0.12359	2.07172	0.0382916	0.288408
DOCK4	ENSG00000128512.15	protein_coding	2391.47	-0.222816	0.107578	-2.07121	0.0383395	0.288606
TET2	ENSG00000168769.8	protein_coding	1459.47	-0.25343	0.122394	-2.0706	0.0383958	0.288868
GALM	ENSG00000143891.12	protein_coding	764.347	-0.247885	0.11976	-2.06985	0.0384665	0.289236
TLE2	ENSG00000065717.10	protein_coding	52.2229	-0.342233	0.165453	-2.06845	0.0385973	0.289339
MYO1D	ENSG00000176658.12	protein_coding	122.996	-0.340539	0.164613	-2.06872	0.0385725	0.289339
VDAC1	ENSG00000213585.6	protein_coding	13169	0.200037	0.0967151	2.06832	0.0386104	0.289339
PWP2	ENSG00000241945.3	protein_coding	1200.91	0.235129	0.113669	2.06853	0.0385899	0.289339
NUTM2A-AS1	ENSG00000223482.3	antisense	733.144	0.247942	0.119849	2.06879	0.0385657	0.289339
EXOSC6	ENSG00000223496.1	protein_coding	451.822	0.302105	0.146005	2.06914	0.038533	0.289339
SERPINH1	ENSG00000149257.9	protein_coding	11209.5	0.204385	0.0988446	2.06775	0.0386639	0.289578
ESYT2	ENSG00000117868.11	protein_coding	17397.4	0.186411	0.0901737	2.06724	0.0387113	0.289648
CD24P4	ENSG00000185275.6	pseudogene	390.067	0.291538	0.141032	2.06719	0.0387167	0.289648
RP11-448G15.3	ENSG00000261490.1	sense_overlapping	74.9238	-0.348389	0.168607	-2.06628	0.0388018	0.290122
BCL7B	ENSG00000106635.3	protein_coding	1623.1	0.215453	0.104294	2.06583	0.0388448	0.290281
SCFD2	ENSG00000184178.11	protein_coding	266.424	0.306559	0.148426	2.06539	0.0388857	0.290424
OSER1-AS1	ENSG00000223891.1	lincRNA	646.626	-0.270396	0.13094	-2.06503	0.0389199	0.290516
TENM1	ENSG00000009694.9	protein_coding	1633.97	-0.226719	0.109825	-2.06437	0.038983	0.290824
ANKRD13A	ENSG00000076513.12	protein_coding	1952.58	0.224711	0.108867	2.06409	0.0390092	0.290857
TTC30A	ENSG00000197557.6	protein_coding	113.237	-0.343782	0.166631	-2.06313	0.0391003	0.291374
REXO1	ENSG00000079313.7	protein_coding	919.931	0.258858	0.12552	2.06229	0.03918	0.291804
CMC2	ENSG00000103121.4	protein_coding	468.738	0.295038	0.143081	2.06203	0.0392044	0.291824
GABPB1-AS1	ENSG00000244879.3	processed_transcript	168.728	-0.330961	0.160542	-2.06152	0.0392535	0.291935
SP4	ENSG00000105866.9	protein_coding	207.861	-0.317689	0.154192	-2.06035	0.0393651	0.291935
SYT12	ENSG00000173227.9	protein_coding	410.177	-0.280457	0.136111	-2.0605	0.0393509	0.291935
HTT	ENSG00000197386.6	protein_coding	3980.43	-0.213208	0.103497	-2.06004	0.0393945	0.291935
RPS6	ENSG00000137154.8	protein_coding	16896	0.188087	0.091253	2.06115	0.0392883	0.291935
DVL3	ENSG00000161202.13	protein_coding	5035.93	0.209936	0.10187	2.06083	0.0393196	0.291935
TIPARP	ENSG00000163659.8	protein_coding	3184.28	0.228031	0.110652	2.06079	0.0393231	0.291935
HMOX2	ENSG00000103415.7	protein_coding	900.644	0.243072	0.117981	2.06026	0.0393733	0.291935
CCR7	ENSG00000126353.3	protein_coding	107.807	-0.343125	0.166616	-2.05938	0.0394574	0.292239
PIP4K2A	ENSG00000150867.9	protein_coding	2698.08	0.208096	0.101083	2.05866	0.0395272	0.292593
RAC3	ENSG00000169750.4	protein_coding	414.708	0.286799	0.13934	2.05826	0.0395648	0.292709
P2RY2	ENSG00000175591.7	protein_coding	849.006	-0.252603	0.122798	-2.05705	0.0396813	0.293265
CAMSAP1	ENSG00000130559.14	protein_coding	3174.36	0.202422	0.0984051	2.05702	0.0396838	0.293265
RP11-1006G14.4	ENSG00000260534.1	sense_overlapping	57.3098	-0.344206	0.167622	-2.05347	0.0400272	0.294228
PIPOX	ENSG00000179761.7	protein_coding	36.7483	-0.327371	0.1593	-2.05506	0.0398731	0.294228
LACC1	ENSG00000179630.6	protein_coding	440.632	-0.282376	0.137504	-2.05358	0.0400166	0.294228
SNAP91	ENSG00000065609.10	protein_coding	381.098	-0.281903	0.137338	-2.05262	0.0401093	0.294228
REV3L	ENSG00000009413.11	protein_coding	743.106	-0.254405	0.123921	-2.05295	0.0400771	0.294228
SLC44A5	ENSG00000137968.12	protein_coding	826.065	-0.248152	0.120895	-2.05263	0.0401089	0.294228
FAM120A	ENSG00000048828.12	protein_coding	5325.54	0.190554	0.0927902	2.0536	0.0400141	0.294228
NR2F1	ENSG00000175745.7	protein_coding	2229.99	0.212118	0.103247	2.05446	0.0399307	0.294228
BNIP3	ENSG00000176171.7	protein_coding	19729.5	0.212161	0.103343	2.05298	0.0400749	0.294228
WDR34	ENSG00000119333.7	protein_coding	1295.21	0.22586	0.109927	2.05464	0.0399133	0.294228
DIP2B	ENSG00000066084.8	protein_coding	1336.86	0.237269	0.11555	2.0534	0.0400343	0.294228
ZNF202	ENSG00000166261.6	protein_coding	643.744	0.254175	0.123678	2.05513	0.0398664	0.294228
TMEM156	ENSG00000121895.7	protein_coding	1010.3	0.260177	0.126762	2.05248	0.040123	0.294228
ANXA10	ENSG00000109511.6	protein_coding	345.346	0.288371	0.140349	2.05468	0.0399099	0.294228
NUAK1	ENSG00000074590.9	protein_coding	4082.01	0.194766	0.0949785	2.05063	0.040303	0.295223
SCML2	ENSG00000102098.13	protein_coding	54.1365	0.342186	0.166865	2.05068	0.0402985	0.295223
SLC1A5	ENSG00000105281.8	protein_coding	4209.61	0.216433	0.105587	2.0498	0.0403838	0.295579
PTCHD3P1	ENSG00000224597.5	antisense	694.862	0.246795	0.120407	2.04968	0.0403959	0.295579
PYROXD1	ENSG00000121350.11	protein_coding	147.637	-0.332655	0.16242	-2.04812	0.0405482	0.296273
ZNF268	ENSG00000090612.16	protein_coding	364.739	-0.300887	0.146899	-2.04826	0.0405349	0.296273
TMX1	ENSG00000139921.8	protein_coding	2420.97	-0.234946	0.114718	-2.04803	0.0405574	0.296273
THSD4	ENSG00000187720.10	protein_coding	2466.46	-0.220384	0.107662	-2.047	0.0406584	0.296849
POC1A	ENSG00000164087.3	protein_coding	347.776	0.289693	0.141537	2.04677	0.0406806	0.296849
RP6-99M1.2	ENSG00000270069.1	lincRNA	1562.83	-0.243362	0.118914	-2.04653	0.0407039	0.296856
CASP2	ENSG00000106144.15	protein_coding	647.503	-0.250171	0.122322	-2.04518	0.0408371	0.297581
TMEM57	ENSG00000204178.5	protein_coding	1198.33	0.226796	0.110899	2.04507	0.0408479	0.297581
FAM214A	ENSG00000047346.8	protein_coding	453.12	-0.275951	0.134991	-2.04422	0.0409318	0.297952
CHD7	ENSG00000171316.7	protein_coding	678.623	-0.261632	0.128042	-2.04333	0.0410197	0.297952
NDUFS1	ENSG00000023228.9	protein_coding	2774.39	0.207802	0.101666	2.04396	0.0409571	0.297952
CTCF	ENSG00000102974.10	protein_coding	1907.55	0.216921	0.106143	2.04366	0.0409872	0.297952
ZNF496	ENSG00000162714.8	protein_coding	2094.34	0.221066	0.108186	2.0434	0.0410128	0.297952
HOMER3	ENSG00000051128.14	protein_coding	1586.57	0.229518	0.112333	2.0432	0.0410329	0.297952
AQP3	ENSG00000165272.10	protein_coding	1393.27	-0.262913	0.128717	-2.04257	0.0410953	0.298243
RECK	ENSG00000122707.7	protein_coding	150.955	-0.331361	0.162339	-2.04116	0.0412347	0.298263
DNAH5	ENSG00000039139.9	protein_coding	208.642	-0.320276	0.157013	-2.03981	0.041369	0.298263
SLC2A11	ENSG00000133460.15	protein_coding	201.881	-0.315379	0.154549	-2.04064	0.0412863	0.298263
GSDMB	ENSG00000073605.14	protein_coding	313.578	-0.29459	0.144376	-2.04043	0.0413073	0.298263
SSRP1	ENSG00000149136.3	protein_coding	6451.35	0.187808	0.0919661	2.04214	0.0411377	0.298263
MYO6	ENSG00000196586.9	protein_coding	2864.94	0.208679	0.102196	2.04194	0.0411579	0.298263
STRAP	ENSG00000023734.6	protein_coding	3538.27	0.212721	0.104195	2.04156	0.0411949	0.298263
BYSL	ENSG00000112578.5	protein_coding	1542.5	0.219955	0.107768	2.041	0.0412505	0.298263
STAM	ENSG00000136738.10	protein_coding	1142.81	0.224831	0.110244	2.0394	0.0414105	0.298263
GLA	ENSG00000102393.5	protein_coding	818.239	0.240996	0.11817	2.03939	0.0414111	0.298263
GPR161	ENSG00000143147.10	protein_coding	831.85	0.25684	0.12592	2.0397	0.0413799	0.298263
NFATC3	ENSG00000072736.14	protein_coding	454.886	0.273326	0.134023	2.0394	0.0414101	0.298263
NUAK2	ENSG00000163545.7	protein_coding	344.803	0.297726	0.145932	2.04017	0.0413337	0.298263
FGF14	ENSG00000102466.11	protein_coding	168.67	0.323151	0.158344	2.04081	0.0412692	0.298263
C3orf52	ENSG00000114529.8	protein_coding	128.112	0.335687	0.16464	2.03891	0.041459	0.298447
PGM5	ENSG00000154330.8	protein_coding	398.143	-0.281495	0.138106	-2.03826	0.0415243	0.298476
CPOX	ENSG00000080819.2	protein_coding	4243.65	0.197427	0.0968509	2.03846	0.0415036	0.298476
GNAI2	ENSG00000114353.12	protein_coding	18022.2	0.203303	0.0997575	2.03797	0.0415525	0.298476
LIG3	ENSG00000005156.7	protein_coding	630.452	0.250525	0.122926	2.03801	0.0415486	0.298476
ESPL1	ENSG00000135476.7	protein_coding	424.8	0.282111	0.138464	2.03744	0.0416064	0.298702
NCAPD2	ENSG00000010292.8	protein_coding	2429.87	0.20905	0.102706	2.03543	0.0418074	0.299983
LINC00910	ENSG00000188825.9	lincRNA	71.3878	-0.343583	0.168829	-2.03509	0.0418415	0.300066
TOR3A	ENSG00000186283.9	protein_coding	298.362	-0.293071	0.144043	-2.0346	0.0418907	0.300091
LANCL1	ENSG00000115365.7	protein_coding	1142.36	-0.247122	0.121447	-2.03482	0.0418692	0.300091
ST6GAL1	ENSG00000073849.10	protein_coding	1938.05	0.20712	0.101809	2.03439	0.0419125	0.300091
NUDT4	ENSG00000173598.9	protein_coding	6927.54	0.205656	0.101196	2.03226	0.0421275	0.301469
PMEPA1	ENSG00000124225.11	protein_coding	3792.44	0.194855	0.0959195	2.03144	0.0422099	0.301897
CCNB1IP1	ENSG00000100814.13	protein_coding	1106.25	0.24316	0.119778	2.03008	0.0423482	0.302724
ATP5G2	ENSG00000135390.13	protein_coding	4849.79	-0.205445	0.101215	-2.02978	0.0423787	0.30278
SAMD12	ENSG00000177570.9	protein_coding	275.891	-0.316462	0.155938	-2.02941	0.0424165	0.302888
DECR2	ENSG00000242612.2	protein_coding	260.68	-0.300606	0.148184	-2.0286	0.0424987	0.303208
IRF2BP2	ENSG00000168264.6	protein_coding	1764.47	0.218748	0.107836	2.02852	0.0425069	0.303208
RP11-698N11.4	ENSG00000261355.1	sense_overlapping	67.9996	-0.341523	0.168533	-2.02645	0.0427185	0.304297
SEMA5A	ENSG00000112902.7	protein_coding	144.558	-0.329419	0.162602	-2.02593	0.0427723	0.304297
LEPR	ENSG00000116678.14	protein_coding	1193.51	-0.249123	0.122968	-2.02591	0.0427736	0.304297
TM9SF2	ENSG00000125304.8	protein_coding	6040.58	0.201668	0.0995103	2.0266	0.0427034	0.304297
TUBB6	ENSG00000176014.8	protein_coding	6586.06	0.225092	0.111099	2.02605	0.0427594	0.304297
FAM83A	ENSG00000147689.12	protein_coding	1097.16	-0.234947	0.115989	-2.0256	0.0428054	0.304302
FAM98A	ENSG00000119812.14	protein_coding	1077.13	0.239389	0.11819	2.02546	0.0428199	0.304302
ABHD3	ENSG00000158201.5	protein_coding	270.1	0.311101	0.153712	2.02392	0.0429786	0.305267
C1QTNF6	ENSG00000133466.9	protein_coding	610.447	-0.253085	0.125144	-2.02234	0.043141	0.305976
NQO2	ENSG00000124588.15	protein_coding	1721.32	-0.211428	0.104528	-2.0227	0.0431044	0.305976
ANAPC7	ENSG00000196510.8	protein_coding	1300.15	0.221257	0.10941	2.02228	0.0431472	0.305976
AP1B1	ENSG00000100280.12	protein_coding	2099.1	0.21312	0.105506	2.01997	0.0433864	0.307509
SYPL2	ENSG00000143028.7	protein_coding	148.503	-0.325411	0.161131	-2.01954	0.0434312	0.307557
TRIB2	ENSG00000071575.7	protein_coding	9523.27	0.191949	0.09506	2.01924	0.0434624	0.307557
CHMP4B	ENSG00000101421.3	protein_coding	7282.1	0.193223	0.0956806	2.01946	0.0434396	0.307557
PPP4R1	ENSG00000154845.11	protein_coding	4484.81	0.201375	0.099743	2.01894	0.0434937	0.307616
FANCD2	ENSG00000144554.6	protein_coding	63.0139	0.339521	0.16822	2.01832	0.0435582	0.307908
EGFL8	ENSG00000241404.2	protein_coding	170.596	-0.320321	0.158741	-2.01788	0.0436033	0.308064
OSER1	ENSG00000132823.6	protein_coding	2992.74	0.208224	0.103225	2.01718	0.0436763	0.308416
SIPA1L1	ENSG00000197555.5	protein_coding	5199.55	0.190264	0.0944001	2.0155	0.0438519	0.309165
PDZD8	ENSG00000165650.7	protein_coding	2763.76	0.200211	0.0993174	2.01587	0.0438134	0.309165
SMARCB1	ENSG00000099956.13	protein_coding	3233.49	0.202232	0.100336	2.01556	0.0438465	0.309165
SLC25A3	ENSG00000075415.8	protein_coding	22925.3	0.190643	0.0946363	2.01448	0.0439588	0.309755
CTD-3184A7.4	ENSG00000232442.1	antisense	147.924	-0.32816	0.162994	-2.01332	0.0440812	0.309799
MBP	ENSG00000197971.10	protein_coding	5339.7	-0.19103	0.0948574	-2.01386	0.044024	0.309799
FLOT1	ENSG00000137312.10	protein_coding	4942.72	0.194272	0.0964685	2.01384	0.0440266	0.309799
UNC13B	ENSG00000198722.8	protein_coding	2965.21	0.20408	0.10136	2.01341	0.0440719	0.309799
VSIG1	ENSG00000101842.9	protein_coding	214.989	0.310416	0.154161	2.01358	0.0440542	0.309799
KDM4C	ENSG00000107077.13	protein_coding	452.215	0.265281	0.1318	2.01275	0.0441411	0.310057
RPL22	ENSG00000116251.5	protein_coding	10771	0.198225	0.0985104	2.01223	0.0441961	0.310198
XRCC2	ENSG00000196584.2	protein_coding	55.4485	0.336782	0.167377	2.01212	0.0442076	0.310198
C12orf49	ENSG00000111412.4	protein_coding	2408.73	0.203242	0.101059	2.01113	0.0443114	0.310762
TMEM230	ENSG00000089063.10	protein_coding	2801.27	0.209305	0.104091	2.01079	0.044348	0.310791
JUP	ENSG00000173801.12	protein_coding	5448.55	0.210002	0.104462	2.01032	0.0443972	0.310791
DHCR24	ENSG00000116133.7	protein_coding	11581.6	0.210004	0.104471	2.01016	0.0444138	0.310791
MUS81	ENSG00000172732.7	protein_coding	1279.03	0.220672	0.109756	2.01057	0.0443708	0.310791
CTNNAL1	ENSG00000119326.10	protein_coding	2302.45	0.227842	0.113355	2.00999	0.044432	0.310791
AQP1	ENSG00000240583.6	protein_coding	221.042	-0.30537	0.152004	-2.00896	0.044541	0.31139
KBTBD8	ENSG00000163376.7	protein_coding	352.027	-0.286678	0.142816	-2.00733	0.0447147	0.312022
ZNF517	ENSG00000197363.5	protein_coding	592.813	-0.252273	0.125685	-2.00718	0.0447301	0.312022
PCNP	ENSG00000081154.7	protein_coding	4651.78	-0.220574	0.109897	-2.00709	0.0447401	0.312022
OGFR	ENSG00000060491.12	protein_coding	7814.38	0.210339	0.104793	2.00718	0.0447303	0.312022
KDELR2	ENSG00000136240.5	protein_coding	6516.97	0.219091	0.109169	2.00689	0.0447609	0.312022
HELLS	ENSG00000119969.10	protein_coding	134.316	0.330298	0.16459	2.00679	0.0447718	0.312022
REC8	ENSG00000100918.8	protein_coding	219.733	-0.307008	0.153028	-2.00622	0.0448333	0.312288
TRIO	ENSG00000038382.13	protein_coding	8701.31	0.203761	0.101615	2.00523	0.0449386	0.3127
SORT1	ENSG00000134243.7	protein_coding	3978.4	0.212337	0.105892	2.00522	0.0449393	0.3127
SATB1	ENSG00000182568.12	protein_coding	2965.97	0.206295	0.102894	2.00493	0.0449704	0.312753
CSPG4	ENSG00000173546.7	protein_coding	1628.59	-0.243606	0.121572	-2.00379	0.0450926	0.313181
H1F0	ENSG00000189060.4	protein_coding	15954.7	-0.188978	0.0943146	-2.0037	0.0451024	0.313181
SH2B3	ENSG00000111252.6	protein_coding	14431	0.187382	0.0935065	2.00394	0.0450763	0.313181
SPOCK1	ENSG00000152377.8	protein_coding	442.816	0.265719	0.132637	2.00336	0.045139	0.313272
RSU1	ENSG00000148484.13	protein_coding	2181.35	0.208907	0.104315	2.00265	0.0452151	0.313474
ABLIM1	ENSG00000099204.14	protein_coding	2876.95	0.215928	0.107815	2.00277	0.0452023	0.313474
UNC45A	ENSG00000140553.12	protein_coding	2709.49	0.200644	0.100217	2.0021	0.0452744	0.313722
RASL11A	ENSG00000122035.6	protein_coding	77.2952	-0.337933	0.168904	-2.00074	0.0454208	0.314247
DDX23	ENSG00000174243.5	protein_coding	2527.41	0.203717	0.101804	2.00108	0.0453843	0.314247
CTB-63M22.1	ENSG00000229119.3	pseudogene	195.59	0.310487	0.15518	2.00082	0.0454114	0.314247
KDM2B	ENSG00000089094.12	protein_coding	1737.03	0.220159	0.110081	1.99998	0.0455028	0.314325
SOX4	ENSG00000124766.4	protein_coding	13443.6	0.223875	0.111927	2.00018	0.0454804	0.314325
SLC36A1	ENSG00000123643.8	protein_coding	900.866	0.231754	0.115877	2	0.0454997	0.314325
PSMD6	ENSG00000163636.6	protein_coding	2352.72	0.217388	0.108776	1.99849	0.0456633	0.31527
SNAP23	ENSG00000092531.5	protein_coding	959.874	0.228931	0.114569	1.9982	0.0456953	0.315328
PLXND1	ENSG00000004399.8	protein_coding	5867.47	-0.237124	0.118704	-1.99761	0.0457594	0.315607
ADAMTS9-AS2	ENSG00000241684.1	antisense	47.8169	-0.329329	0.164976	-1.99622	0.0459097	0.31648
SRF	ENSG00000112658.6	protein_coding	3757.85	0.213694	0.107108	1.99513	0.0460288	0.317138
NASP	ENSG00000132780.12	protein_coding	2209.62	0.209181	0.10489	1.99429	0.0461206	0.317606
CTC-429P9.5	ENSG00000267904.1	sense_intronic	108.772	-0.335401	0.168288	-1.99302	0.0462592	0.318075
LSM14A	ENSG00000257103.4	protein_coding	2648.47	-0.20333	0.102033	-1.99279	0.0462841	0.318075
CD97	ENSG00000123146.15	protein_coding	11390.2	0.194575	0.0976341	1.9929	0.0462729	0.318075
WWP2	ENSG00000198373.8	protein_coding	1482.21	0.213844	0.107283	1.99327	0.0462316	0.318075
RABL2B	ENSG00000079974.13	protein_coding	456.144	-0.265934	0.13351	-1.99187	0.0463858	0.31861
CLEC2D	ENSG00000069493.10	protein_coding	92.1137	-0.335288	0.168513	-1.98968	0.0466261	0.318946
PRKAR1B	ENSG00000188191.10	protein_coding	441.562	-0.268512	0.134886	-1.99067	0.0465177	0.318946
YIPF6	ENSG00000181704.7	protein_coding	2292.33	-0.218363	0.109684	-1.99083	0.0464994	0.318946
CCT3	ENSG00000163468.10	protein_coding	10921.6	0.185045	0.0929992	1.98975	0.0466188	0.318946
FUT8	ENSG00000033170.12	protein_coding	7640.41	0.189249	0.0950825	1.99037	0.0465504	0.318946
MSL3	ENSG00000005302.13	protein_coding	1448.38	0.211419	0.106221	1.99037	0.04655	0.318946
MTX2	ENSG00000128654.9	protein_coding	1175.96	0.22633	0.11375	1.98972	0.0466217	0.318946
RP11-395G23.3	ENSG00000254615.2	lincRNA	219.743	0.306017	0.15377	1.99009	0.0465806	0.318946
PSMD3	ENSG00000108344.10	protein_coding	5397.34	0.193425	0.0972935	1.98806	0.0468051	0.320007
RAD51-AS1	ENSG00000245849.2	processed_transcript	205.037	-0.306107	0.154083	-1.98663	0.0469634	0.320271
COPS4	ENSG00000138663.4	protein_coding	1537.23	-0.228101	0.114792	-1.98708	0.0469131	0.320271
RBPJ	ENSG00000168214.16	protein_coding	9342.53	-0.195878	0.0985866	-1.98686	0.0469382	0.320271
ARCN1	ENSG00000095139.9	protein_coding	8610.27	0.181799	0.0915115	1.98663	0.0469637	0.320271
SLC45A3	ENSG00000158715.5	protein_coding	948.449	0.232134	0.116827	1.98699	0.0469236	0.320271
BEAN1	ENSG00000166546.9	protein_coding	49.3078	-0.327378	0.164848	-1.98593	0.047041	0.32047
MRPL18	ENSG00000112110.5	protein_coding	1462.64	0.22042	0.110989	1.98596	0.0470374	0.32047
PIEZO2	ENSG00000154864.7	protein_coding	659.552	-0.280557	0.141394	-1.98422	0.047231	0.321391
ETAA1	ENSG00000143971.7	protein_coding	647.851	-0.253261	0.127683	-1.98351	0.047311	0.321391
TMEM245	ENSG00000106771.8	protein_coding	3594.88	-0.217508	0.109616	-1.98427	0.0472263	0.321391
CANX	ENSG00000127022.10	protein_coding	38235.8	-0.186461	0.0940302	-1.98299	0.047369	0.321391
PDAP1	ENSG00000106244.8	protein_coding	2723.44	0.19851	0.100098	1.98315	0.0473504	0.321391
NDST1	ENSG00000070614.10	protein_coding	7500.61	0.199648	0.100665	1.98329	0.0473353	0.321391
CBFB	ENSG00000067955.9	protein_coding	1300.68	0.222803	0.112315	1.98374	0.0472854	0.321391
PDE12	ENSG00000174840.8	protein_coding	891.004	0.2325	0.117195	1.98388	0.0472693	0.321391
POLD3	ENSG00000077514.4	protein_coding	459.568	0.263452	0.132979	1.98115	0.0475739	0.322618
CARF	ENSG00000138380.13	protein_coding	164.255	-0.31992	0.161574	-1.98002	0.0477012	0.323199
MAFF	ENSG00000185022.7	protein_coding	4145.11	0.211484	0.106812	1.97996	0.0477081	0.323199
SERINC2	ENSG00000168528.7	protein_coding	2341.73	0.226004	0.114179	1.97938	0.0477728	0.323473
CYB5D2	ENSG00000167740.5	protein_coding	772.04	-0.241342	0.121951	-1.97901	0.0478154	0.323597
INPP1	ENSG00000151689.8	protein_coding	1042.77	0.226906	0.114691	1.9784	0.047883	0.32389
SELRC1	ENSG00000162377.4	protein_coding	362.424	0.28123	0.142173	1.97808	0.0479192	0.323971
SPINK4	ENSG00000122711.4	protein_coding	268.484	-0.297173	0.150263	-1.97768	0.0479646	0.324113
PSTK	ENSG00000179988.9	protein_coding	281.839	-0.289579	0.146441	-1.97745	0.0479905	0.324124
CCND2	ENSG00000118971.3	protein_coding	367.521	-0.272183	0.137682	-1.9769	0.048053	0.324137
ALDH7A1	ENSG00000164904.11	protein_coding	2471.16	0.203448	0.102912	1.97691	0.0480518	0.324137
TOP1MT	ENSG00000184428.8	protein_coding	1626.31	0.219031	0.110801	1.97679	0.0480653	0.324137
C17orf53	ENSG00000125319.10	protein_coding	79.2605	0.333695	0.168826	1.97656	0.0480913	0.324149
NOX5	ENSG00000255346.5	protein_coding	8302.47	-0.325105	0.164512	-1.97617	0.048135	0.324183
KLF12	ENSG00000118922.12	protein_coding	1696.66	0.207704	0.105109	1.97609	0.0481451	0.324183
GPR64	ENSG00000173698.13	protein_coding	255.631	-0.297078	0.150395	-1.97532	0.0482319	0.324347
MTSS1L	ENSG00000132613.10	protein_coding	677.442	0.256221	0.12971	1.97534	0.0482296	0.324347
GINS3	ENSG00000181938.9	protein_coding	111.239	0.328257	0.166187	1.97523	0.0482424	0.324347
EEF2K	ENSG00000103319.7	protein_coding	743.811	-0.236239	0.11963	-1.97475	0.0482967	0.324406
HNRNPUL1	ENSG00000105323.12	protein_coding	9907.7	0.189942	0.0961865	1.97472	0.0482997	0.324406
IL1RL1	ENSG00000115602.12	protein_coding	38.0056	0.317634	0.160897	1.97414	0.0483657	0.324686
MTFP1	ENSG00000242114.1	protein_coding	50.8735	-0.327968	0.166215	-1.97315	0.0484781	0.325276
FN1	ENSG00000115414.14	protein_coding	187582	0.20993	0.106412	1.97281	0.0485176	0.325378
CUL4A	ENSG00000139842.10	protein_coding	2534.97	-0.195095	0.0989085	-1.97248	0.0485549	0.325464
EIF6	ENSG00000242372.2	protein_coding	5971.97	0.191758	0.0972379	1.97205	0.0486039	0.325629
SNAP29	ENSG00000099940.7	protein_coding	927.007	0.225263	0.114264	1.97142	0.0486758	0.325947
BX322557.10	ENSG00000215447.3	processed_transcript	302.831	-0.281902	0.143028	-1.97096	0.0487283	0.326135
SULT1C2	ENSG00000198203.5	protein_coding	263.967	-0.298351	0.1514	-1.97061	0.0487689	0.326243
NUP93	ENSG00000102900.8	protein_coding	1204.42	0.215901	0.109575	1.97036	0.0487972	0.326269
EGF	ENSG00000138798.7	protein_coding	52.4052	-0.326896	0.165975	-1.96954	0.0488907	0.326715
CHP1	ENSG00000187446.7	protein_coding	3340.19	0.189749	0.0963582	1.9692	0.0489299	0.326715
ZFP36	ENSG00000128016.4	protein_coding	2476.43	0.222266	0.112875	1.96914	0.0489375	0.326715
CCT6A	ENSG00000146731.6	protein_coding	7744.6	0.202098	0.102656	1.96869	0.0489882	0.326891
[truncated: 26,871 more rows]
