# Supplementary material for: SCIRT lncRNA Restrains Tumorigenesis by Opposing Transcriptional Programs of Tumor-Initiating Cells
Source: Oxford University Press journal article supplement (doi:10.1158/0008-5472.can-20-2612), 2020-11-10
Supplement: 00085472can202612-sup-248586_2_supp_6687199_qpyknp.xlsx [file 00085472can202612-sup-248586_2_supp_6687199_qpyknp.xlsx]

## Sheet: markersCluster3-Her2-2.Seurat
Gene Symbol	Gencode	Biotype	p_val	avg_logFC	pct.1	pct.2	p_val_adj
H19	ENSG00000130600.11	processed_transcript	4.5e-81	4.02423	0.982	0.053	2.6e-76
FAM9C	ENSG00000187268.7	protein_coding	5.52e-80	3.68486	0.764	0.01	3.19e-75
RPS12P26	ENSG00000225193.5	pseudogene	3.06e-75	4.59182	0.873	0.039	1.77e-70
NDST4	ENSG00000138653.5	protein_coding	1.21e-73	3.94678	0.891	0.043	6.99e-69
BPIFB2	ENSG00000078898.6	protein_coding	2.13e-73	3.95925	0.891	0.045	1.23e-68
CEACAM5	ENSG00000105388.10	protein_coding	4.53e-69	3.7279	0.945	0.069	2.62e-64
MUC19	ENSG00000205592.9	protein_coding	7.25e-69	5.81135	0.855	0.045	4.19e-64
KRT20	ENSG00000171431.3	protein_coding	8.07e-62	4.22753	0.709	0.026	4.67e-57
EREG	ENSG00000124882.3	protein_coding	2.7e-61	2.85205	0.982	0.103	1.56e-56
HMGA2	ENSG00000149948.9	protein_coding	6.8e-60	2.43625	0.655	0.02	3.93e-55
RP11-366L20.2	ENSG00000197301.3	protein_coding	1.62e-59	2.46759	0.691	0.024	9.37e-55
RP11-697E2.7	ENSG00000228998.3	pseudogene	1.96e-57	2.65405	0.927	0.095	1.13e-52
KRT86	ENSG00000170442.7	protein_coding	4.05e-57	2.65183	0.764	0.047	2.34e-52
CXCL1	ENSG00000163739.4	protein_coding	1.69e-55	2.96042	0.945	0.118	9.77e-51
SOX2	ENSG00000181449.2	protein_coding	5.7e-54	1.86168	0.673	0.03	3.29e-49
CTD-2331D11.4	ENSG00000249842.1	lincRNA	7.36e-53	3.62385	0.455	0	4.25e-48
GSTA1	ENSG00000243955.1	protein_coding	4.2e-52	2.81589	0.636	0.026	2.43e-47
RPL13AP2	ENSG00000244053.1	pseudogene	1e-50	3.27599	0.436	0	5.79e-46
IGF2BP2	ENSG00000073792.11	protein_coding	1.37e-50	2.80405	0.873	0.093	7.93e-46
CEA	ENSG00000267881.1	protein_coding	1.46e-49	2.74198	0.582	0.02	8.42e-45
CASC9	ENSG00000249395.2	lincRNA	1.46e-48	2.60125	0.436	0.002	8.46e-44
UBD	ENSG00000213886.3	protein_coding	1.47e-48	1.80052	0.945	0.12	8.47e-44
LIN28A	ENSG00000131914.6	protein_coding	4.61e-48	1.85534	0.673	0.043	2.67e-43
KRT81	ENSG00000205426.6	protein_coding	7.41e-48	1.43903	0.836	0.091	4.28e-43
ZNF710	ENSG00000140548.5	protein_coding	6.01e-47	3.01913	1	0.183	3.48e-42
SH3BGRL2	ENSG00000198478.6	protein_coding	1.55e-46	2.28881	0.945	0.124	8.96e-42
LPHN2	ENSG00000117114.15	protein_coding	6.88e-46	2.8707	0.709	0.057	3.98e-41
SLITRK6	ENSG00000184564.8	protein_coding	2.04e-41	2.23661	0.691	0.061	1.18e-36
SIX2	ENSG00000170577.7	protein_coding	2.27e-41	2.17353	0.564	0.032	1.31e-36
MIR205HG	ENSG00000230937.5	lincRNA	2.28e-41	2.82431	0.982	0.215	1.32e-36
UGT3A2	ENSG00000168671.5	protein_coding	3.63e-40	1.76517	0.345	0	2.1e-35
CXCL17	ENSG00000189377.4	protein_coding	4.2e-40	2.37767	0.927	0.174	2.43e-35
SEMA4B	ENSG00000185033.10	protein_coding	5.99e-40	3.34193	1	0.353	3.46e-35
SPP1	ENSG00000118785.9	protein_coding	1.16e-39	-0.267739	1	0.233	6.71e-35
KRT121P	ENSG00000135477.7	pseudogene	5.06e-39	0.601126	0.436	0.012	2.93e-34
NR1D1	ENSG00000126368.5	protein_coding	8.82e-39	2.71194	0.964	0.195	5.1e-34
BMP5	ENSG00000112175.6	protein_coding	2.94e-38	2.42683	0.545	0.034	1.7e-33
IL8	ENSG00000169429.6	protein_coding	5.45e-38	3.79634	1	0.355	3.15e-33
CLCA2	ENSG00000137975.7	protein_coding	1.47e-37	1.98187	0.673	0.069	8.5e-33
RP11-402L6.1	ENSG00000251011.1	antisense	2.33e-37	2.26166	0.418	0.012	1.35e-32
MITF	ENSG00000187098.10	protein_coding	3.61e-37	2.34397	0.818	0.122	2.09e-32
FRK	ENSG00000111816.6	protein_coding	6.91e-37	1.87128	0.909	0.185	4e-32
ACTG2	ENSG00000163017.9	protein_coding	1.36e-36	1.2498	0.545	0.039	7.88e-32
KCNJ12	ENSG00000184185.5	protein_coding	2.49e-36	1.40271	0.564	0.047	1.44e-31
RP11-617F23.1	ENSG00000259291.1	antisense	7.13e-36	2.32764	0.8	0.138	4.13e-31
PKIB	ENSG00000135549.10	protein_coding	7.93e-36	2.68667	0.982	0.282	4.58e-31
C2CD4A	ENSG00000198535.5	protein_coding	8.22e-36	1.40519	0.455	0.02	4.76e-31
STX1A	ENSG00000106089.7	protein_coding	1.27e-35	2.06298	0.745	0.103	7.34e-31
C15orf38	ENSG00000242498.3	protein_coding	1.84e-35	1.69223	0.618	0.059	1.07e-30
ARSJ	ENSG00000180801.11	protein_coding	2.68e-35	0.475898	0.582	0.049	1.55e-30
BHLHE41	ENSG00000123095.5	protein_coding	5.8e-35	2.0715	1	0.288	3.36e-30
PEG10	ENSG00000242265.1	protein_coding	7.56e-35	1.56313	0.891	0.172	4.37e-30
MMP12	ENSG00000110347.7	processed_transcript	2.21e-34	1.9822	0.545	0.045	1.28e-29
TUFMP1	ENSG00000265646.2	pseudogene	5.9e-34	3.35151	0.327	0.004	3.41e-29
CEACAM6	ENSG00000086548.8	protein_coding	8.44e-34	2.81303	1	0.351	4.88e-29
KREMEN1	ENSG00000183762.8	protein_coding	1.48e-33	1.20885	0.691	0.081	8.56e-29
PGC	ENSG00000096088.12	protein_coding	1.77e-33	0.276942	0.4	0.014	1.02e-28
CRYM	ENSG00000103316.6	protein_coding	2.56e-33	2.82076	0.618	0.069	1.48e-28
TDO2	ENSG00000151790.4	protein_coding	3.16e-33	2.11697	0.418	0.018	1.82e-28
PRKAA2	ENSG00000162409.6	protein_coding	4.09e-33	1.36508	0.709	0.101	2.36e-28
TFF3	ENSG00000160180.14	protein_coding	4.21e-33	2.27736	0.982	0.333	2.43e-28
CIB1	ENSG00000185043.6	protein_coding	5.22e-33	2.80786	1	0.677	3.02e-28
NGRN	ENSG00000182768.7	protein_coding	1.49e-32	3.17667	1	0.633	8.61e-28
MTND2P28	ENSG00000225630.1	pseudogene	1.84e-32	2.81982	1	0.986	1.06e-27
ORAOV1	ENSG00000149716.8	protein_coding	2.53e-32	2.0731	0.855	0.189	1.46e-27
CCDC68	ENSG00000166510.9	protein_coding	4.7e-32	2.00433	0.345	0.008	2.72e-27
NADSYN1	ENSG00000172890.7	protein_coding	7.89e-32	2.28815	1	0.394	4.56e-27
ZNF503	ENSG00000165655.14	protein_coding	5.54e-31	0.906478	0.636	0.079	3.2e-26
KLF5	ENSG00000102554.9	protein_coding	6.07e-31	1.9182	0.982	0.296	3.51e-26
NXN	ENSG00000167693.12	protein_coding	2.4e-30	2.34415	0.727	0.12	1.39e-25
CCL20	ENSG00000115009.7	protein_coding	2.77e-30	2.18481	0.6	0.071	1.6e-25
RASD1	ENSG00000108551.4	protein_coding	3.54e-30	1.40059	0.964	0.245	2.04e-25
POTEE	ENSG00000188219.10	protein_coding	7.03e-30	2.11965	0.491	0.045	4.06e-25
RP11-807H22.5	ENSG00000256518.2	pseudogene	8.81e-30	2.79307	0.255	0	5.1e-25
CTD-2331D11.3	ENSG00000249023.1	lincRNA	8.81e-30	2.40511	0.255	0	5.1e-25
MEG3	ENSG00000214548.10	lincRNA	1.58e-29	0.883798	0.545	0.055	9.15e-25
TMEM108	ENSG00000144868.9	protein_coding	1.58e-29	1.97848	0.509	0.047	9.15e-25
PLEKHH2	ENSG00000152527.9	protein_coding	1.6e-29	2.35456	0.782	0.15	9.23e-25
C3orf65	ENSG00000163915.3	protein_coding	2.31e-29	2.12487	0.418	0.026	1.34e-24
TBX5	ENSG00000089225.15	protein_coding	4.47e-29	1.30063	0.4	0.022	2.59e-24
GDPGP1	ENSG00000183208.8	protein_coding	5.59e-29	1.88262	0.545	0.057	3.23e-24
CDK12	ENSG00000167258.9	protein_coding	1.01e-28	1.93186	1	0.641	5.82e-24
PTPN13	ENSG00000163629.8	protein_coding	1.12e-28	1.6466	0.964	0.262	6.47e-24
PLXDC1	ENSG00000161381.9	protein_coding	1.65e-28	2.08308	0.545	0.061	9.55e-24
PLCB1	ENSG00000182621.12	protein_coding	2.04e-28	2.26929	0.8	0.17	1.18e-23
MISP	ENSG00000099812.6	protein_coding	2.06e-28	2.10177	0.673	0.108	1.19e-23
ANO1	ENSG00000131620.13	protein_coding	2.34e-28	1.55935	0.927	0.245	1.35e-23
MEIS1	ENSG00000143995.15	protein_coding	6.31e-28	1.46833	0.655	0.097	3.65e-23
CAPS	ENSG00000105519.8	protein_coding	7.04e-28	2.1409	0.836	0.205	4.07e-23
MYCN	ENSG00000134323.10	protein_coding	7.48e-28	1.47812	0.382	0.02	4.32e-23
NRCAM	ENSG00000091129.15	protein_coding	1.03e-27	1.01253	0.327	0.012	5.96e-23
HMGB3P19	ENSG00000217085.2	pseudogene	1.21e-27	2.41671	0.255	0.002	7e-23
DHCR7	ENSG00000172893.11	protein_coding	1.35e-27	2.22835	0.964	0.396	7.81e-23
RP11-697E2.9	ENSG00000271396.1	pseudogene	1.67e-27	1.23517	0.273	0.004	9.65e-23
S100P	ENSG00000163993.6	protein_coding	1.72e-27	1.4773	0.964	0.308	9.94e-23
AP3S2	ENSG00000157823.12	protein_coding	1.75e-27	2.50884	0.982	0.43	1.01e-22
PDE10A	ENSG00000112541.9	protein_coding	2.87e-27	1.06191	0.382	0.022	1.66e-22
CPE	ENSG00000109472.9	protein_coding	4.58e-27	1.5107	0.964	0.316	2.65e-22
AL132709.5	ENSG00000225746.4	lincRNA	6.29e-27	3.84795	0.309	0.01	3.64e-22
IDH2	ENSG00000182054.5	protein_coding	1.08e-26	2.12416	1	0.621	6.26e-22
DUSP6	ENSG00000139318.7	protein_coding	1.42e-26	2.11771	1	0.45	8.2e-22
AC092669.3	ENSG00000232164.1	lincRNA	2.09e-26	1.75646	0.418	0.034	1.21e-21
ONECUT2	ENSG00000119547.5	protein_coding	2.1e-26	1.4331	0.727	0.14	1.21e-21
TMEM150C	ENSG00000249242.3	protein_coding	2.11e-26	1.66188	0.891	0.264	1.22e-21
FER1L4	ENSG00000088340.11	pseudogene	3.31e-26	2.03759	0.564	0.075	1.91e-21
RYR3	ENSG00000198838.7	protein_coding	3.8e-26	1.60751	0.491	0.053	2.19e-21
MFAP3L	ENSG00000198948.7	protein_coding	5.32e-26	1.67948	0.691	0.122	3.07e-21
MCOLN3	ENSG00000055732.8	protein_coding	5.35e-26	1.69811	0.418	0.032	3.09e-21
PLOD2	ENSG00000152952.7	protein_coding	5.67e-26	1.13508	0.927	0.235	3.28e-21
FAM110C	ENSG00000184731.5	protein_coding	6.27e-26	1.63158	0.836	0.197	3.62e-21
RPL19	ENSG00000108298.5	protein_coding	6.79e-26	1.59816	1	0.99	3.93e-21
WDR72	ENSG00000166415.10	protein_coding	7.17e-26	0.649792	0.273	0.006	4.15e-21
KIAA0753	ENSG00000198920.5	protein_coding	8.51e-26	1.8366	0.764	0.17	4.92e-21
FBXL20	ENSG00000108306.7	protein_coding	9.45e-26	2.33178	0.727	0.158	5.46e-21
PITX1	ENSG00000069011.11	protein_coding	1.74e-25	0.956676	0.618	0.093	1.01e-20
TRIB3	ENSG00000101255.6	protein_coding	2.58e-25	1.94647	0.945	0.294	1.49e-20
CHRM3	ENSG00000133019.7	protein_coding	3.22e-25	1.03607	0.491	0.055	1.86e-20
SCNN1A	ENSG00000111319.8	protein_coding	3.77e-25	1.84258	0.945	0.308	2.18e-20
TMEM117	ENSG00000139173.5	protein_coding	4.39e-25	1.92192	0.527	0.067	2.54e-20
HUNK	ENSG00000142149.4	protein_coding	4.47e-25	0.563975	0.382	0.026	2.58e-20
CDC42EP3	ENSG00000163171.6	protein_coding	9.22e-25	1.78927	0.964	0.394	5.33e-20
PPP1R1B	ENSG00000131771.9	protein_coding	1.35e-24	1.29111	1	0.367	7.83e-20
VWF	ENSG00000110799.9	protein_coding	1.48e-24	0.917702	0.4	0.032	8.54e-20
GRIA4	ENSG00000152578.8	protein_coding	2.15e-24	2.61968	0.309	0.014	1.24e-19
RP11-889L3.1	ENSG00000218227.3	pseudogene	2.16e-24	1.60487	0.982	0.744	1.25e-19
IRX2	ENSG00000170561.8	protein_coding	2.9e-24	1.39306	0.927	0.288	1.68e-19
SGMS2	ENSG00000164023.10	protein_coding	4.5e-24	0.679292	0.855	0.209	2.6e-19
LINC00649	ENSG00000237945.3	antisense	5.49e-24	1.61424	0.618	0.11	3.18e-19
SSPN	ENSG00000123096.7	protein_coding	5.55e-24	1.53073	0.8	0.195	3.21e-19
SPRED1	ENSG00000166068.8	protein_coding	6.98e-24	1.0089	0.709	0.134	4.04e-19
TEAD3	ENSG00000007866.14	protein_coding	1.96e-23	1.55021	0.745	0.176	1.13e-18
MUC6	ENSG00000184956.11	protein_coding	2.2e-23	1.30745	0.782	0.187	1.27e-18
KCNS3	ENSG00000170745.7	protein_coding	2.45e-23	1.88324	0.673	0.132	1.41e-18
PITPNM3	ENSG00000091622.11	protein_coding	3.26e-23	0.782279	0.4	0.037	1.88e-18
LIF	ENSG00000128342.4	protein_coding	6.39e-23	1.78092	0.527	0.075	3.7e-18
ETV5	ENSG00000244405.3	protein_coding	7.15e-23	1.35159	0.855	0.252	4.14e-18
RP11-89K21.1	ENSG00000259439.1	lincRNA	7.61e-23	2.34471	0.327	0.02	4.4e-18
MIA3	ENSG00000154305.12	protein_coding	8.48e-23	1.96223	1	0.706	4.9e-18
STXBP6	ENSG00000168952.11	protein_coding	1.19e-22	1.4778	0.4	0.037	6.9e-18
AREG	ENSG00000109321.6	protein_coding	1.43e-22	2.03998	0.836	0.262	8.29e-18
PLCB4	ENSG00000101333.12	protein_coding	3.68e-22	1.97042	0.818	0.249	2.13e-17
MED1	ENSG00000125686.7	protein_coding	4.56e-22	1.95579	0.982	0.57	2.64e-17
PLCL1	ENSG00000115896.11	protein_coding	4.57e-22	0.983923	0.291	0.014	2.64e-17
GRB7	ENSG00000141738.9	protein_coding	4.95e-22	0.967904	1	0.353	2.86e-17
TRAF4	ENSG00000076604.10	protein_coding	5.84e-22	1.75796	0.909	0.333	3.38e-17
SHANK2	ENSG00000162105.12	protein_coding	6.1e-22	1.71087	0.945	0.383	3.53e-17
FAT1	ENSG00000083857.9	protein_coding	7.14e-22	1.17778	0.945	0.351	4.13e-17
LYZ	ENSG00000090382.2	protein_coding	8.87e-22	-2.62221	0.818	0.219	5.13e-17
CALML5	ENSG00000178372.6	protein_coding	1.02e-21	0.736871	0.727	0.152	5.9e-17
CAV2	ENSG00000105971.10	protein_coding	1.43e-21	1.68973	0.6	0.112	8.25e-17
RP11-697E2.6	ENSG00000261147.1	protein_coding	2.31e-21	1.53527	0.345	0.028	1.34e-16
S100A6	ENSG00000197956.5	protein_coding	2.36e-21	1.36677	1	0.783	1.36e-16
CTB-131K11.1	ENSG00000266469.1	antisense	3.48e-21	1.57898	0.745	0.193	2.01e-16
PAPSS2	ENSG00000198682.8	protein_coding	3.96e-21	1.38954	0.8	0.221	2.29e-16
C6orf223	ENSG00000181577.11	protein_coding	4.02e-21	0.990353	0.255	0.01	2.33e-16
CTD-3018O17.3	ENSG00000269834.1	processed_transcript	4.04e-21	0.927147	0.582	0.103	2.34e-16
SIX4	ENSG00000100625.8	protein_coding	5.59e-21	1.50172	0.855	0.254	3.23e-16
LAMA5	ENSG00000130702.9	protein_coding	5.88e-21	1.54036	0.782	0.231	3.4e-16
ST6GALNAC1	ENSG00000070526.10	protein_coding	6.26e-21	2.41905	0.345	0.028	3.62e-16
RND3	ENSG00000115963.9	protein_coding	6.87e-21	1.38311	0.945	0.343	3.97e-16
RP11-325P15.1	ENSG00000225603.3	pseudogene	7.22e-21	0.464262	0.291	0.016	4.17e-16
MID1	ENSG00000101871.10	protein_coding	7.43e-21	1.02891	0.582	0.103	4.3e-16
RP11-551L14.1	ENSG00000177359.13	pseudogene	7.56e-21	2.08409	0.509	0.083	4.37e-16
CXCL2	ENSG00000081041.8	protein_coding	7.68e-21	0.625858	0.782	0.193	4.44e-16
EPCAM	ENSG00000119888.6	protein_coding	1.02e-20	1.4071	1	0.623	5.88e-16
HLA-H	ENSG00000206341.6	pseudogene	1.4e-20	1.45282	0.945	0.458	8.08e-16
AKR1B10	ENSG00000198074.5	protein_coding	1.66e-20	1.35325	0.327	0.024	9.61e-16
ACKR2	ENSG00000144648.10	protein_coding	1.71e-20	1.57623	0.564	0.101	9.91e-16
FABP6	ENSG00000170231.11	protein_coding	1.88e-20	2.18775	0.273	0.014	1.09e-15
KIAA1549	ENSG00000122778.5	protein_coding	1.89e-20	0.804111	0.691	0.154	1.1e-15
RALGAPA2	ENSG00000188559.9	protein_coding	2.03e-20	1.39835	0.855	0.288	1.17e-15
WIPI1	ENSG00000070540.8	protein_coding	2.38e-20	1.41236	0.836	0.282	1.38e-15
WASF1	ENSG00000112290.8	protein_coding	2.52e-20	1.80554	0.473	0.069	1.46e-15
RP11-676J12.7	ENSG00000262003.1	protein_coding	2.57e-20	1.80863	0.364	0.037	1.48e-15
RP11-509E16.1	ENSG00000261452.1	lincRNA	3.06e-20	1.79139	0.436	0.059	1.77e-15
AP000487.5	ENSG00000246889.2	antisense	3.17e-20	1.81554	0.673	0.154	1.83e-15
GJB7	ENSG00000164411.6	protein_coding	3.2e-20	2.03113	0.345	0.03	1.85e-15
RP1-86D1.3	ENSG00000182404.6	sense_intronic	3.55e-20	1.76902	0.4	0.045	2.05e-15
ETV4	ENSG00000175832.8	protein_coding	4.07e-20	1.73093	0.6	0.128	2.35e-15
LEPREL2	ENSG00000110811.15	polymorphic_pseudogene	5.63e-20	1.2524	0.418	0.049	3.26e-15
KCNAB1	ENSG00000169282.13	protein_coding	1.01e-19	1.59911	0.618	0.128	5.86e-15
C16orf89	ENSG00000153446.11	protein_coding	1.03e-19	1.59487	0.4	0.047	5.95e-15
ANO7	ENSG00000146205.9	protein_coding	1.64e-19	1.32257	0.345	0.032	9.48e-15
TPBG	ENSG00000146242.5	protein_coding	1.7e-19	1.72467	0.855	0.308	9.85e-15
AGR2	ENSG00000106541.7	protein_coding	2.28e-19	1.10208	1	0.473	1.32e-14
SMARCA1	ENSG00000102038.11	protein_coding	2.48e-19	1.24206	0.782	0.229	1.44e-14
BDKRB2	ENSG00000168398.5	protein_coding	3e-19	0.766737	0.473	0.071	1.73e-14
RP1-86D1.2	ENSG00000228972.1	sense_intronic	3.22e-19	1.50005	0.473	0.073	1.86e-14
HCP5	ENSG00000206337.6	sense_overlapping	3.32e-19	1.10022	0.8	0.245	1.92e-14
S100A16	ENSG00000188643.6	protein_coding	3.86e-19	1.48589	1	0.531	2.23e-14
CAPN8	ENSG00000203697.7	protein_coding	4.16e-19	1.35218	0.636	0.144	2.4e-14
TMCC3	ENSG00000057704.6	protein_coding	4.33e-19	0.784252	0.545	0.097	2.5e-14
WBP5	ENSG00000185222.7	protein_coding	4.59e-19	1.57774	0.945	0.426	2.65e-14
ARHGAP26	ENSG00000145819.11	protein_coding	4.93e-19	1.11867	0.891	0.333	2.85e-14
RAB27B	ENSG00000041353.5	protein_coding	5.88e-19	1.65316	0.873	0.318	3.4e-14
CLUHP3	ENSG00000131797.8	pseudogene	5.98e-19	1.06932	0.673	0.158	3.46e-14
EPAS1	ENSG00000116016.9	protein_coding	6e-19	1.28354	0.873	0.262	3.47e-14
UGT2B7	ENSG00000171234.9	protein_coding	6.12e-19	0.773543	0.345	0.034	3.54e-14
BPIFB1	ENSG00000125999.6	protein_coding	6.53e-19	1.91152	0.382	0.045	3.78e-14
SPRY4	ENSG00000187678.8	protein_coding	6.53e-19	0.956373	0.436	0.059	3.78e-14
MT1X	ENSG00000187193.8	protein_coding	7.29e-19	1.26204	1	0.566	4.21e-14
PXDN	ENSG00000130508.6	protein_coding	7.31e-19	1.00676	0.982	0.414	4.22e-14
HHIPL2	ENSG00000143512.8	protein_coding	7.57e-19	1.36422	0.309	0.024	4.38e-14
ARL5B	ENSG00000165997.4	protein_coding	7.65e-19	1.56876	1	0.592	4.42e-14
SGCE	ENSG00000127990.11	protein_coding	9.63e-19	1.54945	0.6	0.128	5.57e-14
PPARGC1A	ENSG00000109819.4	protein_coding	9.75e-19	1.14169	0.436	0.059	5.64e-14
TTLL13	ENSG00000213471.4	protein_coding	1.14e-18	0.864369	0.309	0.026	6.57e-14
ULBP2	ENSG00000131015.4	protein_coding	1.16e-18	1.46538	0.545	0.105	6.71e-14
NPAS2	ENSG00000170485.12	protein_coding	1.3e-18	0.791532	0.545	0.103	7.54e-14
CD200R1	ENSG00000163606.6	protein_coding	1.47e-18	0.877148	0.364	0.041	8.52e-14
PLEKHG1	ENSG00000120278.10	protein_coding	1.48e-18	0.466656	0.727	0.181	8.55e-14
AMMECR1	ENSG00000101935.5	protein_coding	2.37e-18	1.77739	0.709	0.193	1.37e-13
PGAP3	ENSG00000161395.8	protein_coding	2.77e-18	1.07722	0.873	0.29	1.6e-13
SULT1C2	ENSG00000198203.5	protein_coding	3.6e-18	-0.353152	0.327	0.03	2.08e-13
TNC	ENSG00000041982.10	protein_coding	3.61e-18	0.467447	0.545	0.105	2.09e-13
CNNM2	ENSG00000148842.13	protein_coding	3.64e-18	0.949538	0.491	0.085	2.1e-13
MED9	ENSG00000141026.4	protein_coding	4.15e-18	0.829393	0.509	0.089	2.4e-13
MAP2K3	ENSG00000034152.14	protein_coding	5.18e-18	1.51458	0.964	0.586	3e-13
C15orf38-AP3S2	ENSG00000250021.3	protein_coding	5.64e-18	2.72095	0.764	0.349	3.26e-13
EPB41L5	ENSG00000115109.9	protein_coding	6.09e-18	1.54677	0.927	0.416	3.52e-13
EGFR	ENSG00000146648.11	protein_coding	6.13e-18	1.28597	0.782	0.256	3.54e-13
RP11-378J18.8	ENSG00000272750.1	antisense	6.13e-18	1.59282	0.582	0.132	3.55e-13
MYO1B	ENSG00000128641.13	protein_coding	8.54e-18	1.08502	0.873	0.298	4.94e-13
CLPB	ENSG00000162129.8	protein_coding	9.04e-18	1.14588	0.618	0.138	5.22e-13
MYO10	ENSG00000145555.10	protein_coding	1.01e-17	1.52438	0.945	0.458	5.84e-13
MNAT1	ENSG00000020426.6	protein_coding	1.14e-17	1.32931	0.964	0.511	6.6e-13
ZNF704	ENSG00000164684.9	protein_coding	1.17e-17	1.13842	0.909	0.398	6.79e-13
ST6GALNAC2	ENSG00000070731.5	protein_coding	1.38e-17	1.99218	0.745	0.262	7.95e-13
ITSN1	ENSG00000205726.9	protein_coding	1.46e-17	1.25807	0.909	0.347	8.43e-13
TXNDC17	ENSG00000129235.6	protein_coding	1.56e-17	1.74777	1	0.755	9.03e-13
DDAH2	ENSG00000213722.4	protein_coding	1.57e-17	0.858228	0.909	0.331	9.05e-13
ZNF579	ENSG00000218891.2	protein_coding	1.74e-17	0.702992	0.418	0.061	1.01e-12
ZNF629	ENSG00000102870.4	protein_coding	1.77e-17	0.783189	0.545	0.116	1.02e-12
TRIP10	ENSG00000125733.13	protein_coding	1.78e-17	0.93859	0.836	0.288	1.03e-12
LPHN3	ENSG00000150471.11	protein_coding	1.79e-17	0.696	0.291	0.024	1.04e-12
IER3	ENSG00000137331.11	protein_coding	1.87e-17	0.650127	1	0.477	1.08e-12
TRIM16	ENSG00000221926.7	protein_coding	1.9e-17	1.46954	0.782	0.262	1.1e-12
PRODH	ENSG00000100033.12	protein_coding	2.28e-17	0.80705	0.509	0.093	1.32e-12
CCNJL	ENSG00000135083.10	protein_coding	2.31e-17	0.835941	0.291	0.024	1.34e-12
HSPA1A	ENSG00000204389.8	protein_coding	2.72e-17	1.47905	1	0.826	1.57e-12
SLC7A11	ENSG00000151012.9	protein_coding	2.75e-17	1.23344	0.782	0.264	1.59e-12
GRHL1	ENSG00000134317.13	protein_coding	3.01e-17	1.25338	0.982	0.465	1.74e-12
BTN2A3P	ENSG00000124549.10	pseudogene	3.53e-17	1.80624	0.382	0.051	2.04e-12
NTN1	ENSG00000065320.4	protein_coding	4.4e-17	0.625031	0.345	0.041	2.54e-12
WFDC2	ENSG00000101443.13	protein_coding	4.61e-17	1.0452	0.709	0.189	2.66e-12
ABTB2	ENSG00000166016.4	protein_coding	4.94e-17	0.873595	0.455	0.077	2.85e-12
CTSL	ENSG00000135047.10	protein_coding	4.97e-17	1.23689	0.964	0.396	2.88e-12
TSPAN12	ENSG00000106025.4	protein_coding	6.57e-17	0.882949	0.491	0.085	3.8e-12
HOOK1	ENSG00000134709.6	protein_coding	7.1e-17	1.23255	0.945	0.426	4.1e-12
HID1	ENSG00000167861.11	protein_coding	7.58e-17	1.11509	0.818	0.302	4.39e-12
PFN2	ENSG00000070087.9	protein_coding	8e-17	1.24218	1	0.527	4.62e-12
ATP6V1C2	ENSG00000143882.5	protein_coding	8.17e-17	0.362531	0.927	0.414	4.73e-12
MSL1	ENSG00000188895.7	protein_coding	9.13e-17	0.87676	1	0.651	5.28e-12
RP11-690G19.3	ENSG00000266753.2	lincRNA	9.27e-17	1.71736	0.636	0.174	5.36e-12
DPY19L2P4	ENSG00000235436.6	pseudogene	9.28e-17	1.32128	0.255	0.018	5.36e-12
MPP3	ENSG00000161647.14	protein_coding	9.73e-17	1.41089	0.673	0.217	5.63e-12
C8orf4	ENSG00000176907.3	protein_coding	1.14e-16	0.841292	0.8	0.26	6.61e-12
CNTN1	ENSG00000018236.10	protein_coding	1.23e-16	1.11873	0.327	0.037	7.1e-12
RPL41	ENSG00000229117.4	protein_coding	1.3e-16	-0.892032	1	1	7.51e-12
ZKSCAN8	ENSG00000198315.6	protein_coding	1.33e-16	0.72153	0.636	0.156	7.7e-12
RP11-44F21.5	ENSG00000260265.1	lincRNA	1.61e-16	2.1481	0.436	0.077	9.28e-12
PCDHB11	ENSG00000197479.4	protein_coding	1.64e-16	0.597474	0.273	0.022	9.49e-12
PTPN12	ENSG00000127947.11	protein_coding	2.04e-16	1.02051	1	0.572	1.18e-11
UBE3D	ENSG00000118420.12	protein_coding	2.86e-16	1.36749	0.473	0.085	1.66e-11
RP11-624L4.1	ENSG00000259345.1	antisense	3.7e-16	1.75698	0.291	0.028	2.14e-11
GPR98	ENSG00000164199.11	protein_coding	4.24e-16	0.883207	0.455	0.081	2.45e-11
MT-ND4L	ENSG00000212907.2	protein_coding	4.73e-16	1.01766	1	0.996	2.73e-11
BMP7	ENSG00000101144.8	protein_coding	4.99e-16	0.616853	0.6	0.144	2.89e-11
FMNL2	ENSG00000157827.15	protein_coding	5.81e-16	0.497066	0.782	0.245	3.36e-11
STRN	ENSG00000115808.7	protein_coding	5.99e-16	1.13704	0.873	0.357	3.46e-11
NLK	ENSG00000087095.8	protein_coding	6.24e-16	0.484564	0.836	0.304	3.61e-11
LGALS3BP	ENSG00000108679.8	protein_coding	6.75e-16	0.982531	0.982	0.505	3.9e-11
MT-ND1	ENSG00000198888.2	protein_coding	7.75e-16	1.05362	1	1	4.48e-11
ALOX12P2	ENSG00000262943.3	pseudogene	8.36e-16	0.383178	0.291	0.028	4.83e-11
WIPF2	ENSG00000171475.9	protein_coding	8.83e-16	1.42929	1	0.617	5.11e-11
B4GALT5	ENSG00000158470.5	protein_coding	1.02e-15	1.44218	0.927	0.552	5.9e-11
PPFIA1	ENSG00000131626.11	protein_coding	1.08e-15	1.05742	1	0.706	6.25e-11
LRP6	ENSG00000070018.4	protein_coding	1.21e-15	1.12105	0.873	0.363	6.97e-11
CYP3A5	ENSG00000106258.9	protein_coding	1.22e-15	2.06426	0.618	0.174	7.08e-11
PDGFB	ENSG00000100311.12	protein_coding	1.28e-15	1.64889	0.4	0.065	7.4e-11
ANXA1	ENSG00000135046.9	protein_coding	1.46e-15	0.784989	0.927	0.444	8.43e-11
ADAM9	ENSG00000168615.7	protein_coding	1.64e-15	1.3823	1	0.57	9.49e-11
FLOT2	ENSG00000132589.11	protein_coding	1.71e-15	1.24883	0.909	0.418	9.91e-11
NOV	ENSG00000136999.4	protein_coding	1.91e-15	1.46879	0.364	0.051	1.11e-10
ENO2	ENSG00000111674.4	protein_coding	1.93e-15	0.61103	0.6	0.15	1.12e-10
ANK3	ENSG00000151150.16	protein_coding	2.02e-15	1.62881	0.855	0.389	1.17e-10
NOD2	ENSG00000167207.7	protein_coding	2.09e-15	1.01524	0.436	0.077	1.21e-10
XXbac-BPG252P9.10	ENSG00000272273.1	antisense	2.4e-15	1.13967	0.8	0.337	1.39e-10
KPNA5	ENSG00000196911.5	protein_coding	2.47e-15	0.802063	0.764	0.245	1.43e-10
MARK1	ENSG00000116141.11	protein_coding	2.47e-15	1.42182	0.509	0.11	1.43e-10
KCNK1	ENSG00000135750.10	protein_coding	2.64e-15	1.51975	0.855	0.335	1.53e-10
GALNT12	ENSG00000119514.5	protein_coding	3.93e-15	1.96718	0.4	0.069	2.27e-10
RP1-152L7.5	ENSG00000216775.2	pseudogene	4.03e-15	1.64077	0.382	0.059	2.33e-10
CALD1	ENSG00000122786.15	protein_coding	4.27e-15	0.857072	0.891	0.394	2.47e-10
TPM3P9	ENSG00000241015.2	pseudogene	4.81e-15	0.430546	0.636	0.158	2.78e-10
FAM46A	ENSG00000112773.11	protein_coding	5.1e-15	0.863742	0.982	0.572	2.95e-10
LINC00667	ENSG00000263753.2	lincRNA	6.17e-15	0.879692	0.709	0.205	3.57e-10
PLAUR	ENSG00000011422.7	protein_coding	6.3e-15	0.584935	0.8	0.318	3.64e-10
SASH1	ENSG00000111961.12	protein_coding	6.33e-15	0.85728	0.873	0.329	3.66e-10
C7orf13	ENSG00000244291.1	protein_coding	6.81e-15	1.1183	0.345	0.049	3.94e-10
RP11-660L16.2	ENSG00000254682.1	antisense	6.86e-15	1.82143	0.455	0.091	3.97e-10
ITGB4	ENSG00000132470.9	protein_coding	7.34e-15	1.23474	0.545	0.138	4.25e-10
SEMA3E	ENSG00000170381.8	protein_coding	7.45e-15	0.846334	0.655	0.189	4.31e-10
GRB10	ENSG00000106070.13	protein_coding	7.52e-15	1.11816	0.618	0.178	4.35e-10
HOXB-AS3	ENSG00000233101.6	antisense	8.28e-15	1.74464	0.327	0.043	4.79e-10
CAPN13	ENSG00000162949.12	protein_coding	8.82e-15	1.26052	0.691	0.209	5.1e-10
HLA-J	ENSG00000204622.6	pseudogene	9.48e-15	0.52104	0.727	0.254	5.48e-10
GTPBP2	ENSG00000172432.14	protein_coding	1.01e-14	1.48258	0.745	0.266	5.82e-10
ERBB2	ENSG00000141736.9	protein_coding	1.06e-14	0.591953	1	0.576	6.12e-10
DDR1	ENSG00000204580.7	protein_coding	1.08e-14	0.994148	0.982	0.568	6.25e-10
TNFAIP1	ENSG00000109079.5	protein_coding	1.18e-14	1.36874	0.782	0.286	6.84e-10
HIVEP2	ENSG00000010818.4	protein_coding	1.2e-14	1.0379	0.982	0.489	6.93e-10
RAI14	ENSG00000039560.9	protein_coding	1.22e-14	1.09402	0.745	0.241	7.05e-10
KIF1C	ENSG00000129250.7	protein_coding	1.39e-14	1.24011	0.745	0.264	8.03e-10
ERRFI1	ENSG00000116285.8	protein_coding	1.44e-14	1.35866	0.909	0.436	8.34e-10
POTEI	ENSG00000196834.7	protein_coding	1.51e-14	0.764169	0.473	0.108	8.74e-10
CAMP	ENSG00000164047.3	protein_coding	1.55e-14	1.58061	0.364	0.055	8.97e-10
ARSG	ENSG00000141337.8	protein_coding	1.66e-14	1.14834	0.764	0.294	9.59e-10
SLC18B1	ENSG00000146409.6	protein_coding	1.68e-14	1.11638	0.418	0.075	9.7e-10
MAP1B	ENSG00000131711.10	protein_coding	1.82e-14	0.920006	0.873	0.383	1.05e-09
SLCO1A2	ENSG00000084453.12	protein_coding	1.83e-14	2.23209	0.255	0.024	1.06e-09
NET1	ENSG00000173848.14	protein_coding	1.87e-14	1.09964	1	0.718	1.08e-09
NCALD	ENSG00000104490.13	protein_coding	2.23e-14	1.25222	0.727	0.264	1.29e-09
CAPZA1	ENSG00000116489.8	protein_coding	2.25e-14	-1.36014	1	0.99	1.3e-09
DISC1	ENSG00000162946.16	protein_coding	2.51e-14	1.56305	0.4	0.073	1.45e-09
CLDN4	ENSG00000189143.8	protein_coding	2.53e-14	0.747436	1	0.677	1.46e-09
RPL41P1	ENSG00000227063.4	pseudogene	2.56e-14	-0.871588	1	0.97	1.48e-09
SULT1C4	ENSG00000198075.5	protein_coding	2.68e-14	0.70111	0.273	0.028	1.55e-09
AGPAT9	ENSG00000138678.6	protein_coding	3.02e-14	1.05635	0.491	0.103	1.75e-09
MED31	ENSG00000108590.6	protein_coding	3.07e-14	1.47628	0.836	0.4	1.77e-09
MET	ENSG00000105976.10	protein_coding	3.14e-14	1.04932	0.527	0.126	1.82e-09
SLC12A7	ENSG00000113504.15	protein_coding	3.33e-14	0.85503	0.818	0.339	1.93e-09
HSP90AB1	ENSG00000096384.15	protein_coding	3.44e-14	0.874545	1	1	1.99e-09
RP11-1143G9.4	ENSG00000257764.2	antisense	3.55e-14	-2.74178	0.636	0.174	2.05e-09
CHIC1	ENSG00000204116.7	protein_coding	3.81e-14	0.46921	0.382	0.061	2.2e-09
MT-ND2	ENSG00000198763.3	protein_coding	3.98e-14	0.859106	1	1	2.3e-09
DAPK1	ENSG00000196730.8	protein_coding	3.98e-14	0.987393	0.618	0.172	2.3e-09
IBTK	ENSG00000005700.10	protein_coding	4.42e-14	1.1938	1	0.588	2.55e-09
TPT1-AS1	ENSG00000170919.11	antisense	4.71e-14	1.18469	0.618	0.185	2.72e-09
DCTN1	ENSG00000204843.8	protein_coding	4.78e-14	1.32982	0.873	0.525	2.76e-09
ZSCAN9	ENSG00000137185.7	protein_coding	5.19e-14	1.09661	0.564	0.144	3e-09
CEACAM1	ENSG00000079385.17	protein_coding	5.44e-14	1.00682	0.727	0.245	3.15e-09
PBDC1	ENSG00000102390.6	protein_coding	5.52e-14	1.26571	0.982	0.716	3.19e-09
GALNT7	ENSG00000109586.7	protein_coding	5.61e-14	1.49476	0.945	0.493	3.25e-09
TET3	ENSG00000187605.11	protein_coding	5.86e-14	0.416946	0.891	0.369	3.39e-09
SLC28A3	ENSG00000197506.6	protein_coding	6.44e-14	0.542804	0.436	0.081	3.72e-09
ZBTB2	ENSG00000181472.4	protein_coding	6.45e-14	1.24951	0.836	0.379	3.73e-09
SOX4	ENSG00000124766.4	protein_coding	7.14e-14	1.00763	1	0.931	4.13e-09
PEX11A	ENSG00000166821.4	protein_coding	7.39e-14	1.17684	0.745	0.268	4.27e-09
HLA-A	ENSG00000206503.7	protein_coding	7.48e-14	0.928466	1	0.751	4.32e-09
NAPB	ENSG00000125814.13	protein_coding	7.51e-14	1.05114	0.545	0.138	4.34e-09
S100A14	ENSG00000189334.4	protein_coding	7.76e-14	0.981151	0.927	0.46	4.49e-09
LARP6	ENSG00000166173.9	protein_coding	7.92e-14	1.17551	0.327	0.047	4.58e-09
DNALI1	ENSG00000163879.9	protein_coding	8.18e-14	1.54197	0.545	0.146	4.73e-09
LMO7	ENSG00000136153.15	protein_coding	8.37e-14	1.68831	0.818	0.327	4.84e-09
RRBP1	ENSG00000125844.11	protein_coding	8.49e-14	1.38379	0.945	0.716	4.91e-09
RP11-435B5.4	ENSG00000185044.10	lincRNA	8.86e-14	1.70543	0.655	0.201	5.12e-09
MT-ND4	ENSG00000198886.2	protein_coding	9.19e-14	0.896581	1	1	5.31e-09
MRPS26	ENSG00000125901.5	protein_coding	9.77e-14	1.23076	0.8	0.323	5.65e-09
PTMS	ENSG00000159335.11	protein_coding	1e-13	1.09054	0.891	0.42	5.8e-09
SRD5A1	ENSG00000145545.7	protein_coding	1.15e-13	0.756121	0.545	0.13	6.63e-09
ZBTB39	ENSG00000166860.2	protein_coding	1.17e-13	1.30332	0.436	0.087	6.77e-09
ATP2C2	ENSG00000064270.8	protein_coding	1.2e-13	1.36291	0.655	0.213	6.96e-09
USP54	ENSG00000166348.13	protein_coding	1.23e-13	0.842094	0.891	0.436	7.1e-09
ARFGAP1	ENSG00000101199.8	protein_coding	1.23e-13	1.18881	0.691	0.256	7.13e-09
CDC6	ENSG00000094804.5	protein_coding	1.26e-13	0.53756	0.909	0.373	7.3e-09
CTC-524C5.2	ENSG00000263272.1	antisense	1.28e-13	0.895864	0.655	0.223	7.41e-09
RPL27	ENSG00000131469.8	protein_coding	1.29e-13	-1.14922	0.964	0.982	7.46e-09
CCND1	ENSG00000110092.3	protein_coding	1.32e-13	0.503285	1	0.497	7.61e-09
STK38L	ENSG00000211455.3	protein_coding	1.5e-13	1.10102	0.964	0.552	8.65e-09
PPP3R1	ENSG00000221823.6	protein_coding	1.63e-13	0.440633	0.764	0.304	9.44e-09
GATA6	ENSG00000141448.4	protein_coding	1.76e-13	0.760282	0.4	0.075	1.02e-08
TSPAN3	ENSG00000140391.10	protein_coding	1.76e-13	1.24898	0.964	0.509	1.02e-08
CPD	ENSG00000108582.7	protein_coding	1.89e-13	1.2078	1	0.598	1.09e-08
PERP	ENSG00000112378.11	protein_coding	1.91e-13	0.892836	0.982	0.623	1.1e-08
ATAT1	ENSG00000137343.13	protein_coding	2.06e-13	0.771871	0.564	0.144	1.19e-08
GOLM1	ENSG00000135052.12	protein_coding	2.07e-13	1.14505	0.945	0.554	1.2e-08
SGPP2	ENSG00000163082.9	protein_coding	2.18e-13	1.2986	0.436	0.095	1.26e-08
BTN2A2	ENSG00000124508.12	protein_coding	2.47e-13	0.831593	0.745	0.268	1.43e-08
ITPR3	ENSG00000096433.6	protein_coding	2.56e-13	0.927175	0.727	0.276	1.48e-08
ITIH6	ENSG00000102313.8	protein_coding	2.63e-13	0.84144	0.309	0.043	1.52e-08
MLLT4	ENSG00000130396.16	protein_coding	2.91e-13	1.119	0.982	0.613	1.68e-08
GPR56	ENSG00000205336.7	protein_coding	2.95e-13	0.82322	0.945	0.426	1.71e-08
TNNT1	ENSG00000105048.12	protein_coding	2.99e-13	1.29522	0.618	0.195	1.73e-08
ANXA3	ENSG00000138772.8	protein_coding	3.21e-13	0.808911	0.673	0.211	1.85e-08
PLAGL2	ENSG00000126003.6	protein_coding	3.32e-13	0.988993	0.873	0.385	1.92e-08
SNRNP48	ENSG00000168566.11	protein_coding	3.33e-13	0.80463	0.782	0.296	1.92e-08
CHML	ENSG00000203668.1	protein_coding	3.44e-13	0.729559	0.836	0.314	1.99e-08
CLIC6	ENSG00000159212.8	protein_coding	3.83e-13	0.828756	0.327	0.049	2.21e-08
SNX9	ENSG00000130340.10	protein_coding	3.97e-13	0.836766	0.927	0.55	2.3e-08
RAB11FIP1	ENSG00000156675.11	protein_coding	4.11e-13	0.640729	1	0.874	2.38e-08
FBXO30	ENSG00000118496.4	protein_coding	4.14e-13	1.09714	0.709	0.256	2.39e-08
RP11-805J14.5	ENSG00000254721.1	antisense	4.18e-13	1.25818	0.636	0.199	2.42e-08
HSPA1B	ENSG00000204388.5	protein_coding	4.3e-13	0.943841	1	0.696	2.49e-08
RP11-706O15.5	ENSG00000205663.5	lincRNA	4.81e-13	0.885862	0.418	0.085	2.78e-08
CTD-2031P19.4	ENSG00000264281.2	pseudogene	5.15e-13	-1.04264	0.873	0.947	2.98e-08
GPT2	ENSG00000166123.9	protein_coding	5.56e-13	0.766262	0.764	0.262	3.21e-08
SLC44A5	ENSG00000137968.12	protein_coding	6.14e-13	0.931582	0.309	0.045	3.55e-08
DNAJC12	ENSG00000108176.10	protein_coding	6.33e-13	1.0056	0.582	0.164	3.66e-08
RCAN1	ENSG00000159200.13	protein_coding	6.63e-13	0.833904	0.745	0.298	3.84e-08
RPS13	ENSG00000110700.2	protein_coding	6.9e-13	-0.900067	0.982	0.974	3.99e-08
RALB	ENSG00000144118.9	protein_coding	7.05e-13	1.31878	0.855	0.394	4.07e-08
PJA1	ENSG00000181191.11	protein_coding	7.11e-13	1.25166	0.582	0.183	4.11e-08
H3F3B	ENSG00000132475.4	protein_coding	7.15e-13	0.936237	1	0.988	4.14e-08
HS6ST2	ENSG00000171004.13	protein_coding	7.35e-13	1.35953	0.327	0.051	4.25e-08
STK35	ENSG00000125834.8	protein_coding	7.55e-13	1.32176	0.836	0.396	4.36e-08
MAL2	ENSG00000147676.9	protein_coding	7.67e-13	0.893322	1	0.578	4.44e-08
NAA30	ENSG00000139977.9	protein_coding	7.68e-13	1.06916	0.818	0.331	4.44e-08
AL035252.1	ENSG00000268302.1	protein_coding	7.79e-13	0.815777	0.673	0.227	4.51e-08
MMD	ENSG00000108960.3	protein_coding	7.96e-13	1.42341	0.655	0.221	4.6e-08
ENTPD6	ENSG00000197586.8	protein_coding	8.16e-13	1.31896	0.782	0.341	4.72e-08
CTA-797E19.1	ENSG00000254484.1	sense_intronic	8.34e-13	1.23823	0.473	0.112	4.82e-08
BCL2L1	ENSG00000171552.8	protein_coding	8.56e-13	0.71015	0.818	0.296	4.95e-08
TNFAIP2	ENSG00000185215.4	protein_coding	8.87e-13	0.873277	0.927	0.487	5.13e-08
ZNF649	ENSG00000198093.6	protein_coding	8.92e-13	1.37578	0.509	0.14	5.16e-08
CADPS2	ENSG00000081803.11	protein_coding	9.17e-13	0.954536	0.782	0.302	5.3e-08
NIPAL1	ENSG00000163293.7	protein_coding	9.37e-13	1.05776	0.418	0.087	5.42e-08
CHD6	ENSG00000124177.10	protein_coding	9.84e-13	1.33784	0.982	0.682	5.69e-08
TUBB3	ENSG00000258947.2	protein_coding	9.87e-13	0.864742	0.691	0.237	5.71e-08
PPP1R12C	ENSG00000125503.8	protein_coding	9.95e-13	0.777211	0.618	0.189	5.75e-08
ZNF702P	ENSG00000242779.2	pseudogene	9.98e-13	0.985889	0.473	0.114	5.77e-08
PALLD	ENSG00000129116.13	protein_coding	1.02e-12	0.845059	0.836	0.406	5.88e-08
KIF1A	ENSG00000130294.10	protein_coding	1.07e-12	0.896969	0.345	0.059	6.19e-08
SEMA3C	ENSG00000075223.9	protein_coding	1.1e-12	0.797325	0.855	0.404	6.34e-08
SERTAD2	ENSG00000179833.4	protein_coding	1.11e-12	1.00346	0.909	0.509	6.43e-08
GAS8	ENSG00000141013.10	protein_coding	1.12e-12	1.12791	0.655	0.219	6.49e-08
MLF2	ENSG00000089693.6	protein_coding	1.16e-12	0.889771	0.982	0.704	6.72e-08
HK2	ENSG00000159399.5	protein_coding	1.18e-12	0.793339	1	0.584	6.84e-08
UBXN2A	ENSG00000173960.8	protein_coding	1.2e-12	0.959609	0.873	0.398	6.95e-08
ARHGAP21	ENSG00000107863.12	protein_coding	1.24e-12	0.738669	0.982	0.517	7.18e-08
RPL18AP3	ENSG00000213442.4	pseudogene	1.42e-12	-0.915003	0.945	0.961	8.19e-08
TMEM176A	ENSG00000002933.3	protein_coding	1.46e-12	0.692181	0.436	0.095	8.47e-08
SLC22A23	ENSG00000137266.10	protein_coding	1.51e-12	0.956479	0.545	0.158	8.72e-08
ST3GAL5	ENSG00000115525.12	protein_coding	1.53e-12	0.541909	0.727	0.262	8.83e-08
AC007382.1	ENSG00000268688.1	protein_coding	1.55e-12	1.43532	0.291	0.041	8.97e-08
TFPI	ENSG00000003436.10	protein_coding	1.62e-12	0.794702	0.618	0.209	9.37e-08
TNFRSF21	ENSG00000146072.6	protein_coding	1.64e-12	0.554698	0.636	0.189	9.5e-08
GATA3	ENSG00000107485.11	protein_coding	1.68e-12	-3.44728	0.145	0.645	9.69e-08
SLC4A11	ENSG00000088836.8	protein_coding	1.7e-12	0.721688	0.545	0.142	9.82e-08
CTD-3099C6.9	ENSG00000269825.1	sense_intronic	1.74e-12	1.17993	0.545	0.144	1e-07
RP11-732M18.3	ENSG00000236537.1	lincRNA	1.84e-12	0.96722	0.8	0.341	1.06e-07
VNN3	ENSG00000093134.9	protein_coding	1.85e-12	2.10065	0.291	0.043	1.07e-07
ZNF816	ENSG00000180257.8	protein_coding	1.9e-12	1.28479	0.636	0.207	1.1e-07
TMEM214	ENSG00000119777.14	protein_coding	2.05e-12	0.987257	0.855	0.462	1.19e-07
CP	ENSG00000047457.9	protein_coding	2.17e-12	0.643124	0.8	0.345	1.25e-07
CXCL3	ENSG00000163734.4	protein_coding	2.19e-12	-0.502981	0.309	0.047	1.27e-07
FAM64A	ENSG00000129195.11	protein_coding	2.27e-12	1.06776	0.255	0.03	1.31e-07
GPX2	ENSG00000176153.10	protein_coding	2.28e-12	-1.25835	0.309	0.045	1.32e-07
C15orf48	ENSG00000166920.6	protein_coding	2.31e-12	0.339785	0.636	0.207	1.34e-07
OPN3	ENSG00000054277.8	protein_coding	2.47e-12	0.594811	0.673	0.239	1.43e-07
GBP5	ENSG00000154451.10	protein_coding	2.61e-12	0.427573	0.782	0.306	1.51e-07
RPS3	ENSG00000149273.10	protein_coding	2.62e-12	-0.832553	1	0.992	1.51e-07
C15orf39	ENSG00000167173.14	protein_coding	2.72e-12	0.798834	0.727	0.27	1.58e-07
MTFR1	ENSG00000066855.11	protein_coding	2.77e-12	1.1171	0.8	0.343	1.6e-07
RP11-356C4.5	ENSG00000261172.1	lincRNA	2.86e-12	1.31038	0.255	0.03	1.65e-07
CBX4	ENSG00000141582.10	protein_coding	2.93e-12	0.87658	0.8	0.349	1.7e-07
LCA5	ENSG00000135338.9	protein_coding	2.96e-12	1.06487	0.418	0.091	1.71e-07
SPRED2	ENSG00000198369.5	protein_coding	3.09e-12	0.910182	0.927	0.456	1.79e-07
HSF2	ENSG00000025156.8	protein_coding	3.23e-12	0.90294	0.818	0.327	1.87e-07
MT-ATP8	ENSG00000228253.1	protein_coding	3.47e-12	0.859805	1	0.998	2e-07
DIDO1	ENSG00000101191.12	protein_coding	3.68e-12	1.29032	0.891	0.562	2.13e-07
KLK11	ENSG00000167757.9	protein_coding	3.68e-12	1.52167	0.345	0.063	2.13e-07
ZNF528	ENSG00000167555.9	protein_coding	3.75e-12	0.847969	0.545	0.158	2.17e-07
CD24P4	ENSG00000185275.6	pseudogene	4.03e-12	1.55653	0.836	0.505	2.33e-07
NFATC4	ENSG00000100968.9	protein_coding	4.29e-12	1.10333	0.545	0.156	2.48e-07
PRSS8	ENSG00000052344.11	protein_coding	4.33e-12	0.891646	0.945	0.481	2.5e-07
FAM135A	ENSG00000082269.12	protein_coding	4.33e-12	0.933425	0.527	0.148	2.51e-07
LTBP1	ENSG00000049323.11	protein_coding	4.46e-12	0.717432	0.8	0.323	2.58e-07
MNX1	ENSG00000130675.10	protein_coding	4.55e-12	0.847477	0.418	0.089	2.63e-07
MAGED1	ENSG00000179222.13	protein_coding	4.72e-12	0.962822	0.982	0.606	2.73e-07
IL1B	ENSG00000125538.7	protein_coding	4.78e-12	-0.298236	0.455	0.105	2.76e-07
TET1	ENSG00000138336.8	protein_coding	5.12e-12	0.574698	0.4	0.085	2.96e-07
DHX57	ENSG00000163214.16	protein_coding	5.39e-12	1.32586	0.691	0.276	3.12e-07
ZNF761	ENSG00000160336.10	processed_transcript	5.44e-12	1.27599	0.873	0.43	3.14e-07
KIF3C	ENSG00000084731.9	protein_coding	5.55e-12	1.06204	0.491	0.13	3.21e-07
SDCBP2	ENSG00000125775.10	protein_coding	5.89e-12	0.750451	0.436	0.095	3.4e-07
PGM3	ENSG00000013375.11	protein_coding	6.03e-12	1.07955	0.964	0.59	3.48e-07
RIMS2	ENSG00000176406.16	protein_coding	6.72e-12	1.2975	0.309	0.051	3.89e-07
FBXO32	ENSG00000156804.3	protein_coding	7.08e-12	0.632252	0.945	0.509	4.09e-07
RP11-2J18.1	ENSG00000218596.2	pseudogene	7.58e-12	0.910072	0.382	0.075	4.38e-07
GFPT1	ENSG00000198380.8	protein_coding	7.66e-12	1.09801	1	0.657	4.43e-07
LAMC1	ENSG00000135862.5	protein_coding	7.69e-12	0.698255	0.709	0.239	4.44e-07
KCNQ1OT1	ENSG00000269821.1	antisense	7.72e-12	0.83301	0.982	0.637	4.46e-07
CTD-2319I12.1	ENSG00000261040.2	processed_transcript	7.76e-12	1.49837	0.255	0.032	4.49e-07
RNF39	ENSG00000204618.4	protein_coding	7.76e-12	1.58207	0.364	0.075	4.49e-07
CSRP2	ENSG00000175183.5	protein_coding	7.88e-12	0.654076	0.636	0.203	4.56e-07
SLC44A4	ENSG00000204385.6	protein_coding	8.11e-12	0.733442	0.873	0.418	4.69e-07
RPS23	ENSG00000186468.8	protein_coding	8.28e-12	-0.996792	0.927	0.974	4.79e-07
LLGL2	ENSG00000073350.9	protein_coding	8.28e-12	1.26805	0.727	0.272	4.79e-07
DBNDD1	ENSG00000003249.9	protein_coding	8.3e-12	1.57873	0.691	0.284	4.8e-07
MED24	ENSG00000008838.13	protein_coding	8.49e-12	0.668887	0.927	0.406	4.91e-07
AC005077.14	ENSG00000230882.1	pseudogene	8.5e-12	0.688728	0.291	0.045	4.91e-07
TRA2A	ENSG00000164548.6	protein_coding	8.55e-12	-1.06145	0.982	0.99	4.94e-07
AP001615.9	ENSG00000236883.1	antisense	8.89e-12	1.0241	0.545	0.16	5.14e-07
NT5C2	ENSG00000076685.14	protein_coding	9.43e-12	0.778036	0.927	0.483	5.45e-07
CATSPERG	ENSG00000099338.18	protein_coding	9.64e-12	1.51529	0.455	0.116	5.58e-07
PNISR	ENSG00000132424.10	protein_coding	9.94e-12	0.783081	1	0.899	5.75e-07
PPM1H	ENSG00000111110.7	protein_coding	1e-11	0.548359	0.891	0.379	5.79e-07
VSIG4	ENSG00000155659.10	protein_coding	1.09e-11	-0.830405	0.345	0.063	6.29e-07
CHMP4B	ENSG00000101421.3	protein_coding	1.1e-11	1.23805	0.836	0.446	6.35e-07
EHMT2	ENSG00000204371.7	protein_coding	1.11e-11	1.03399	0.782	0.353	6.39e-07
EFNB2	ENSG00000125266.6	protein_coding	1.13e-11	1.08001	0.582	0.189	6.55e-07
SMAD9	ENSG00000120693.9	protein_coding	1.17e-11	1.29185	0.455	0.12	6.76e-07
S1PR3	ENSG00000213694.3	protein_coding	1.3e-11	0.590332	0.491	0.132	7.51e-07
IGF2R	ENSG00000197081.8	protein_coding	1.34e-11	1.35747	0.909	0.55	7.73e-07
ATP9A	ENSG00000054793.9	protein_coding	1.41e-11	1.28292	0.8	0.351	8.15e-07
SERAC1	ENSG00000122335.9	protein_coding	1.44e-11	1.09169	0.582	0.178	8.33e-07
CA5B	ENSG00000169239.8	protein_coding	1.57e-11	0.866745	0.727	0.278	9.08e-07
AC010761.10	ENSG00000265840.1	antisense	1.57e-11	1.34187	0.618	0.203	9.1e-07
CUL7	ENSG00000044090.4	protein_coding	1.6e-11	1.17134	0.618	0.215	9.23e-07
PRUNE2	ENSG00000106772.13	protein_coding	1.63e-11	0.880545	0.291	0.047	9.42e-07
SCAF8	ENSG00000213079.5	protein_coding	1.71e-11	1.04246	0.927	0.649	9.9e-07
CHMP4C	ENSG00000164695.4	protein_coding	1.72e-11	0.787387	0.836	0.357	9.92e-07
HSDL1	ENSG00000103160.7	protein_coding	1.75e-11	1.6326	0.582	0.178	1.01e-06
AL034548.1	ENSG00000247315.2	pseudogene	2.16e-11	0.639946	0.745	0.329	1.25e-06
RP11-427H3.3	ENSG00000188971.4	lincRNA	2.21e-11	0.562521	0.764	0.316	1.28e-06
C6orf106	ENSG00000196821.5	protein_coding	2.25e-11	1.23039	0.964	0.529	1.3e-06
TAP1	ENSG00000168394.9	protein_coding	2.46e-11	0.808421	0.891	0.448	1.42e-06
LRIG3	ENSG00000139263.7	protein_coding	2.64e-11	0.760668	0.582	0.193	1.53e-06
NUP93	ENSG00000102900.8	protein_coding	2.72e-11	0.93277	0.873	0.479	1.57e-06
DTNA	ENSG00000134769.17	protein_coding	2.82e-11	1.04448	0.764	0.318	1.63e-06
CHMP1A	ENSG00000131165.10	protein_coding	2.84e-11	0.944813	0.818	0.367	1.64e-06
XDH	ENSG00000158125.5	protein_coding	2.88e-11	1.46115	0.345	0.071	1.66e-06
CAMK2N1	ENSG00000162545.5	protein_coding	2.89e-11	0.876915	0.818	0.331	1.67e-06
PDLIM5	ENSG00000163110.10	protein_coding	3.01e-11	0.606964	0.982	0.566	1.74e-06
GATS	ENSG00000239521.3	pseudogene	3.01e-11	0.838638	0.382	0.083	1.74e-06
MALAT1	ENSG00000251562.3	lincRNA	3.02e-11	-1.09048	1	1	1.74e-06
MSR1	ENSG00000038945.10	protein_coding	3.07e-11	-1.19082	0.4	0.083	1.78e-06
FAM84A	ENSG00000162981.12	protein_coding	3.13e-11	1.53218	0.564	0.181	1.81e-06
EMP1	ENSG00000134531.5	protein_coding	3.19e-11	0.474443	0.964	0.456	1.85e-06
ATRN	ENSG00000088812.13	protein_coding	3.26e-11	1.10131	0.636	0.225	1.89e-06
SHROOM2	ENSG00000146950.8	protein_coding	3.3e-11	1.15353	0.364	0.075	1.91e-06
DYNLL2	ENSG00000264364.2	protein_coding	3.37e-11	0.299928	0.836	0.385	1.95e-06
ZNF880	ENSG00000221923.4	protein_coding	3.4e-11	1.29493	0.6	0.217	1.96e-06
PDIA6	ENSG00000143870.8	protein_coding	3.5e-11	1.21579	0.964	0.832	2.03e-06
NFKBIA	ENSG00000100906.6	protein_coding	3.59e-11	0.766561	1	0.895	2.08e-06
RPS25	ENSG00000118181.6	protein_coding	3.6e-11	-0.815909	1	0.986	2.08e-06
ARHGDIB	ENSG00000111348.4	protein_coding	3.8e-11	-3.02592	0.727	0.852	2.2e-06
B3GNT5	ENSG00000176597.7	protein_coding	3.9e-11	0.632459	0.709	0.28	2.26e-06
MAP3K4	ENSG00000085511.15	protein_coding	3.99e-11	0.825601	0.745	0.302	2.3e-06
COL14A1	ENSG00000187955.7	protein_coding	4.26e-11	1.03405	0.291	0.049	2.46e-06
AHR	ENSG00000106546.8	protein_coding	4.27e-11	0.965335	0.891	0.509	2.47e-06
WDR45B	ENSG00000141580.11	protein_coding	4.67e-11	0.44625	0.982	0.609	2.7e-06
PRSS16	ENSG00000112812.11	protein_coding	4.86e-11	0.933995	0.364	0.075	2.81e-06
RASSF8	ENSG00000123094.11	protein_coding	4.9e-11	0.814973	0.436	0.11	2.83e-06
KIAA1244	ENSG00000112379.8	protein_coding	4.97e-11	0.777628	0.964	0.556	2.87e-06
ZNF432	ENSG00000256087.2	protein_coding	5.12e-11	0.731085	0.655	0.243	2.96e-06
GBP1	ENSG00000117228.9	protein_coding	5.45e-11	0.521181	0.855	0.438	3.15e-06
PALM2	ENSG00000243444.3	protein_coding	5.48e-11	0.850788	0.255	0.037	3.17e-06
FOLR1	ENSG00000110195.7	protein_coding	5.5e-11	0.685237	0.509	0.146	3.18e-06
CRNKL1	ENSG00000101343.10	protein_coding	5.71e-11	1.05045	0.891	0.533	3.3e-06
NDRG1	ENSG00000104419.10	protein_coding	5.91e-11	0.504178	0.909	0.509	3.42e-06
MIR181A1HG	ENSG00000229989.3	lincRNA	6.02e-11	1.41408	0.564	0.193	3.48e-06
RHOB	ENSG00000143878.8	protein_coding	6.05e-11	0.674708	1	0.769	3.5e-06
KAL1	ENSG00000011201.6	protein_coding	6.25e-11	0.937607	0.564	0.178	3.61e-06
ARNTL2	ENSG00000029153.10	protein_coding	6.5e-11	1.57786	0.255	0.037	3.76e-06
GALNT4	ENSG00000257594.2	protein_coding	6.54e-11	0.331969	0.636	0.217	3.78e-06
RPL18A	ENSG00000105640.8	protein_coding	6.58e-11	-0.785279	0.982	0.988	3.8e-06
CASC3	ENSG00000108349.10	protein_coding	6.67e-11	0.574907	0.982	0.669	3.86e-06
DSP	ENSG00000096696.9	protein_coding	6.85e-11	0.762399	1	0.779	3.96e-06
FAM13A	ENSG00000138640.10	protein_coding	7.28e-11	0.697645	0.764	0.349	4.21e-06
GADD45A	ENSG00000116717.7	protein_coding	7.64e-11	0.883592	0.818	0.385	4.42e-06
AC103965.1	ENSG00000225151.6	pseudogene	7.64e-11	0.368044	0.636	0.221	4.42e-06
ZCCHC3	ENSG00000177764.6	protein_coding	7.68e-11	0.285473	0.473	0.134	4.44e-06
CASK	ENSG00000147044.16	protein_coding	7.72e-11	0.794219	0.945	0.596	4.46e-06
ZC3H7B	ENSG00000100403.10	protein_coding	7.87e-11	0.391053	0.527	0.164	4.55e-06
TMEM30B	ENSG00000182107.5	protein_coding	8.23e-11	0.856032	0.655	0.237	4.76e-06
TTLL4	ENSG00000135912.6	protein_coding	8.27e-11	1.06919	0.764	0.306	4.78e-06
CMIP	ENSG00000153815.12	protein_coding	8.3e-11	0.871338	0.8	0.351	4.8e-06
C10orf11	ENSG00000148655.10	protein_coding	8.4e-11	0.978158	0.291	0.051	4.85e-06
RPS6	ENSG00000137154.8	protein_coding	8.43e-11	-0.815337	1	0.992	4.87e-06
RPL12	ENSG00000197958.8	protein_coding	8.65e-11	-0.907251	0.964	0.972	5e-06
GCNT1	ENSG00000187210.8	protein_coding	8.76e-11	0.34775	0.527	0.156	5.06e-06
MIPEP	ENSG00000027001.7	protein_coding	8.95e-11	1.70164	0.527	0.172	5.17e-06
ERV3-1	ENSG00000213462.4	protein_coding	9.03e-11	0.836616	0.818	0.379	5.22e-06
ANPEP	ENSG00000166825.9	protein_coding	9.09e-11	0.659194	0.345	0.069	5.26e-06
FMR1	ENSG00000102081.9	protein_coding	9.48e-11	0.871356	0.982	0.613	5.48e-06
SRXN1	ENSG00000271303.1	protein_coding	9.55e-11	1.06338	0.691	0.268	5.52e-06
SLC2A10	ENSG00000197496.4	protein_coding	1.01e-10	0.828408	0.673	0.249	5.87e-06
HDAC2	ENSG00000196591.7	protein_coding	1.03e-10	0.951496	0.982	0.694	5.96e-06
SLC33A1	ENSG00000169359.9	protein_coding	1.04e-10	0.988971	0.855	0.43	6.03e-06
TP53INP2	ENSG00000078804.8	protein_coding	1.06e-10	1.08957	0.873	0.454	6.14e-06
RPL15P3	ENSG00000212802.3	pseudogene	1.08e-10	-0.765597	0.818	0.945	6.23e-06
YIPF4	ENSG00000119820.6	protein_coding	1.08e-10	0.999679	0.964	0.59	6.26e-06
TMEM170B	ENSG00000205269.4	protein_coding	1.09e-10	0.353479	0.327	0.063	6.29e-06
HCG4P5	ENSG00000227766.1	pseudogene	1.12e-10	0.630398	0.582	0.209	6.46e-06
PHLDA1	ENSG00000139289.9	protein_coding	1.13e-10	0.266698	0.873	0.406	6.54e-06
RET	ENSG00000165731.13	protein_coding	1.17e-10	0.713907	0.455	0.12	6.77e-06
IFI27	ENSG00000165949.8	protein_coding	1.18e-10	-0.694898	0.909	0.4	6.84e-06
ABHD12	ENSG00000100997.14	protein_coding	1.21e-10	1.33579	0.673	0.268	7.01e-06
C6orf132	ENSG00000188112.4	protein_coding	1.27e-10	0.521931	0.782	0.349	7.36e-06
RP11-435B5.5	ENSG00000238261.5	lincRNA	1.28e-10	1.88933	0.364	0.083	7.38e-06
TOMM7	ENSG00000196683.6	protein_coding	1.33e-10	-1.38105	0.782	0.888	7.67e-06
GMCL1	ENSG00000087338.4	protein_coding	1.33e-10	0.682771	0.909	0.444	7.68e-06
TULP3	ENSG00000078246.11	protein_coding	1.33e-10	1.17285	0.764	0.337	7.72e-06
TMSB4XP4	ENSG00000223551.1	pseudogene	1.37e-10	0.965884	0.745	0.387	7.91e-06
MTHFD2L	ENSG00000163738.14	protein_coding	1.38e-10	1.17875	0.691	0.282	7.96e-06
NUFIP2	ENSG00000108256.4	protein_coding	1.4e-10	0.955147	1	0.795	8.09e-06
HOXB6	ENSG00000108511.8	protein_coding	1.43e-10	0.957061	0.418	0.105	8.25e-06
FLNA	ENSG00000196924.10	protein_coding	1.48e-10	0.333461	0.818	0.389	8.58e-06
CLCF1	ENSG00000175505.9	protein_coding	1.55e-10	1.21987	0.382	0.089	8.95e-06
PROX1	ENSG00000117707.11	protein_coding	1.59e-10	0.810232	0.364	0.081	9.21e-06
CKAP4	ENSG00000136026.9	protein_coding	1.65e-10	0.961508	0.927	0.554	9.55e-06
PEX13	ENSG00000162928.8	protein_coding	1.73e-10	1.0294	0.836	0.418	1e-05
AADAT	ENSG00000109576.9	protein_coding	1.81e-10	1.47883	0.255	0.041	1.05e-05
LSM14B	ENSG00000149657.15	protein_coding	1.83e-10	0.835737	0.564	0.185	1.06e-05
RP1-3J17.3	ENSG00000236016.3	antisense	1.85e-10	0.597257	0.691	0.254	1.07e-05
ZNF160	ENSG00000170949.13	protein_coding	1.87e-10	0.740704	0.818	0.396	1.08e-05
RPL27A	ENSG00000166441.8	protein_coding	1.89e-10	-0.712284	0.982	0.984	1.09e-05
ZNF549	ENSG00000121406.4	protein_coding	1.92e-10	1.03388	0.364	0.081	1.11e-05
GS1-358P8.4	ENSG00000260822.1	sense_overlapping	1.92e-10	0.729632	0.564	0.197	1.11e-05
SELM	ENSG00000198832.6	protein_coding	1.96e-10	-3.13348	0.091	0.556	1.13e-05
MTATP6P1	ENSG00000248527.1	pseudogene	2.05e-10	0.767528	1	1	1.18e-05
TMEM181	ENSG00000146433.8	protein_coding	2.06e-10	0.596221	0.855	0.396	1.19e-05
SPTSSB	ENSG00000196542.4	protein_coding	2.18e-10	0.84551	0.491	0.148	1.26e-05
ADIPOR2	ENSG00000006831.9	protein_coding	2.2e-10	0.69357	0.891	0.574	1.27e-05
MT-CO2	ENSG00000198712.1	protein_coding	2.26e-10	0.693863	1	1	1.31e-05
ANKRD22	ENSG00000152766.5	protein_coding	2.29e-10	0.422874	0.564	0.189	1.33e-05
DLGAP4	ENSG00000080845.13	protein_coding	2.31e-10	0.824816	0.891	0.475	1.33e-05
NME5	ENSG00000112981.3	protein_coding	2.41e-10	1.18877	0.309	0.059	1.39e-05
RPL7A	ENSG00000148303.12	protein_coding	2.49e-10	-0.970709	0.982	0.976	1.44e-05
SMIM13	ENSG00000224531.4	protein_coding	2.68e-10	0.675763	0.509	0.15	1.55e-05
TMPRSS3	ENSG00000160183.9	protein_coding	2.74e-10	0.569375	0.455	0.12	1.59e-05
HOXA3	ENSG00000105997.18	protein_coding	2.76e-10	0.488721	0.582	0.191	1.59e-05
KLF3	ENSG00000109787.8	protein_coding	2.8e-10	0.886157	0.891	0.446	1.62e-05
ERGIC1	ENSG00000113719.11	protein_coding	2.86e-10	1.06379	0.945	0.641	1.65e-05
HDGFRP3	ENSG00000166503.4	protein_coding	2.93e-10	0.7783	0.745	0.304	1.69e-05
RPL35	ENSG00000136942.10	protein_coding	2.99e-10	-0.77386	1	0.97	1.73e-05
RP1-86D1.4	ENSG00000227112.1	antisense	3e-10	1.31324	0.4	0.103	1.74e-05
TANC2	ENSG00000170921.10	protein_coding	3.05e-10	0.784915	0.691	0.282	1.76e-05
PPP4R1	ENSG00000154845.11	protein_coding	3.18e-10	0.51147	0.891	0.477	1.84e-05
SMAP1	ENSG00000112305.10	protein_coding	3.2e-10	0.836581	0.909	0.517	1.85e-05
MT-ND5	ENSG00000198786.2	protein_coding	3.34e-10	0.688263	1	1	1.93e-05
GPC3	ENSG00000147257.9	protein_coding	3.46e-10	0.68309	0.491	0.146	2e-05
CASP7	ENSG00000165806.15	protein_coding	3.47e-10	0.925579	0.745	0.325	2.01e-05
MYEOV	ENSG00000172927.3	protein_coding	3.48e-10	0.499305	0.255	0.039	2.01e-05
HMGN3	ENSG00000118418.10	protein_coding	3.66e-10	1.04969	0.964	0.765	2.12e-05
UBA52	ENSG00000221983.3	protein_coding	3.7e-10	-0.751692	0.945	0.972	2.14e-05
IFNGR1	ENSG00000027697.8	protein_coding	3.88e-10	0.949868	1	0.631	2.24e-05
DOCK8	ENSG00000107099.11	protein_coding	3.92e-10	-2.76598	0.127	0.576	2.27e-05
LENG9	ENSG00000182909.5	protein_coding	3.99e-10	0.866173	0.655	0.32	2.31e-05
TM4SF1	ENSG00000169908.6	protein_coding	4.04e-10	0.592442	0.982	0.71	2.33e-05
BAIAP2	ENSG00000175866.11	protein_coding	4.13e-10	0.847804	0.655	0.262	2.39e-05
KATNA1	ENSG00000186625.9	protein_coding	4.41e-10	0.612298	0.855	0.43	2.55e-05
RNASE1	ENSG00000129538.9	protein_coding	4.51e-10	-2.46222	0.364	0.079	2.61e-05
PLEKHG6	ENSG00000008323.11	protein_coding	4.55e-10	1.19603	0.436	0.122	2.63e-05
XCL1	ENSG00000143184.4	protein_coding	4.55e-10	0.705043	0.291	0.053	2.63e-05
SPATS2L	ENSG00000196141.8	protein_coding	4.76e-10	0.485172	0.945	0.527	2.75e-05
LYST	ENSG00000143669.9	protein_coding	4.78e-10	0.90659	0.909	0.531	2.76e-05
SLC5A2	ENSG00000140675.8	protein_coding	4.83e-10	1.06185	0.618	0.231	2.79e-05
AREGB	ENSG00000205595.3	protein_coding	4.93e-10	0.766477	0.455	0.126	2.85e-05
B3GNT7	ENSG00000156966.6	protein_coding	4.99e-10	0.966538	0.691	0.3	2.89e-05
LENG8	ENSG00000167615.12	protein_coding	5.01e-10	0.813864	0.745	0.323	2.9e-05
AUTS2	ENSG00000158321.11	protein_coding	5.13e-10	0.47857	0.909	0.485	2.97e-05
PPL	ENSG00000118898.11	protein_coding	5.24e-10	0.960952	0.709	0.308	3.03e-05
AGO2	ENSG00000123908.7	protein_coding	5.37e-10	0.738177	0.873	0.448	3.1e-05
TSPYL4	ENSG00000187189.9	protein_coding	5.74e-10	0.350856	0.655	0.231	3.32e-05
DKK1	ENSG00000107984.5	protein_coding	5.76e-10	0.943285	0.309	0.061	3.33e-05
MIEN1	ENSG00000141741.7	protein_coding	5.87e-10	0.355808	1	0.692	3.4e-05
MNX1-AS2	ENSG00000235029.1	antisense	5.92e-10	1.07855	0.327	0.071	3.42e-05
MANF	ENSG00000145050.11	protein_coding	6.12e-10	0.73485	0.891	0.416	3.54e-05
PHF10	ENSG00000130024.10	protein_coding	6.22e-10	0.308332	0.909	0.505	3.59e-05
ECT2	ENSG00000114346.9	protein_coding	6.22e-10	0.604222	0.855	0.418	3.59e-05
ATP5J	ENSG00000154723.8	protein_coding	6.4e-10	-1.18195	0.8	0.905	3.7e-05
RUNX2	ENSG00000124813.16	protein_coding	6.63e-10	0.314717	0.6	0.209	3.84e-05
HSPE1	ENSG00000115541.6	protein_coding	6.94e-10	0.586871	1	0.923	4.01e-05
TSPAN9	ENSG00000011105.7	protein_coding	7.03e-10	1.01512	0.527	0.172	4.06e-05
HSBP1	ENSG00000230989.2	protein_coding	7.11e-10	0.835567	1	0.884	4.11e-05
EPHB4	ENSG00000196411.5	protein_coding	7.32e-10	0.773433	0.709	0.318	4.23e-05
UBFD1	ENSG00000103353.11	protein_coding	7.52e-10	0.481482	0.818	0.389	4.35e-05
KIAA1217	ENSG00000120549.11	protein_coding	7.53e-10	0.739796	0.982	0.671	4.35e-05
GTF2I	ENSG00000077809.8	protein_coding	7.75e-10	0.90036	1	0.88	4.48e-05
SUPT6H	ENSG00000109111.10	protein_coding	7.85e-10	0.738775	0.927	0.574	4.54e-05
CCDC160	ENSG00000203952.5	protein_coding	7.94e-10	0.864221	0.455	0.13	4.59e-05
NCEH1	ENSG00000144959.5	protein_coding	8.31e-10	0.6878	0.818	0.404	4.8e-05
PDLIM3	ENSG00000154553.9	protein_coding	8.46e-10	0.577905	0.673	0.27	4.89e-05
RP11-134G8.8	ENSG00000224818.1	lincRNA	8.48e-10	1.09066	0.273	0.049	4.9e-05
ARHGAP23	ENSG00000225485.3	protein_coding	8.5e-10	1.10928	0.4	0.099	4.91e-05
CDYL2	ENSG00000166446.10	protein_coding	8.51e-10	0.965485	0.636	0.235	4.92e-05
GLIS2	ENSG00000126603.4	protein_coding	8.84e-10	0.340263	0.291	0.055	5.11e-05
CASKIN2	ENSG00000177303.5	protein_coding	8.88e-10	0.718113	0.382	0.095	5.14e-05
SF3B14	ENSG00000115128.6	protein_coding	9.03e-10	0.83122	0.982	0.878	5.22e-05
ESRP2	ENSG00000103067.7	protein_coding	9.14e-10	1.10102	0.673	0.282	5.28e-05
SRGAP3	ENSG00000196220.11	protein_coding	9.21e-10	0.396341	0.618	0.221	5.32e-05
RNF152	ENSG00000176641.6	protein_coding	9.29e-10	0.412067	0.891	0.462	5.37e-05
THRA	ENSG00000126351.8	protein_coding	9.93e-10	1.45954	0.673	0.266	5.74e-05
SCAF11	ENSG00000139218.13	protein_coding	1.02e-09	0.86522	1	0.911	5.87e-05
TLE1	ENSG00000196781.9	protein_coding	1.02e-09	0.67272	0.782	0.355	5.89e-05
SEC24D	ENSG00000150961.10	protein_coding	1.03e-09	0.733304	0.891	0.505	5.97e-05
TMEM40	ENSG00000088726.11	protein_coding	1.04e-09	0.938181	0.382	0.091	5.99e-05
SH3RF1	ENSG00000154447.10	protein_coding	1.04e-09	0.608216	0.8	0.408	6.01e-05
ADNP2	ENSG00000101544.4	protein_coding	1.05e-09	0.91673	0.855	0.479	6.09e-05
SPTBN2	ENSG00000173898.7	protein_coding	1.08e-09	0.94132	0.473	0.144	6.23e-05
SS18L1	ENSG00000184402.10	protein_coding	1.08e-09	0.647786	0.618	0.239	6.27e-05
MAPK13	ENSG00000156711.12	protein_coding	1.1e-09	0.709101	0.709	0.304	6.33e-05
NCOA7	ENSG00000111912.14	protein_coding	1.13e-09	0.660124	0.982	0.604	6.55e-05
LNX1	ENSG00000072201.9	protein_coding	1.16e-09	1.81344	0.709	0.325	6.7e-05
NCOA6	ENSG00000198646.9	protein_coding	1.19e-09	0.672651	0.909	0.546	6.87e-05
TACC2	ENSG00000138162.13	protein_coding	1.2e-09	1.01645	0.782	0.359	6.93e-05
GYG2	ENSG00000056998.14	protein_coding	1.2e-09	0.719366	0.291	0.055	6.95e-05
FAM210B	ENSG00000124098.9	protein_coding	1.26e-09	1.25147	0.873	0.489	7.26e-05
TMEM176B	ENSG00000106565.13	protein_coding	1.26e-09	0.300326	0.545	0.178	7.31e-05
CDKN2B	ENSG00000147883.9	protein_coding	1.29e-09	0.651353	0.509	0.16	7.44e-05
VEGFA	ENSG00000112715.16	protein_coding	1.3e-09	0.760303	0.964	0.594	7.51e-05
C1S	ENSG00000182326.10	protein_coding	1.32e-09	-1.52258	0.709	0.304	7.64e-05
SBK1	ENSG00000188322.4	protein_coding	1.32e-09	0.710149	0.455	0.138	7.65e-05
IGHMBP2	ENSG00000132740.4	protein_coding	1.45e-09	1.52774	0.527	0.195	8.38e-05
HDLBP	ENSG00000115677.12	protein_coding	1.47e-09	0.848807	1	0.822	8.49e-05
RP11-498C9.13	ENSG00000263585.1	antisense	1.5e-09	0.967937	0.673	0.272	8.65e-05
GIT1	ENSG00000108262.11	protein_coding	1.54e-09	0.720754	0.636	0.252	8.88e-05
RP11-63M22.2	ENSG00000260465.1	antisense	1.56e-09	0.946962	0.782	0.387	9e-05
CUEDC1	ENSG00000180891.8	protein_coding	1.65e-09	0.732196	0.418	0.114	9.57e-05
B3GNT2	ENSG00000170340.10	protein_coding	1.66e-09	0.764746	0.873	0.462	9.57e-05
COL5A2	ENSG00000204262.7	protein_coding	1.67e-09	-0.798979	0.364	0.087	9.65e-05
BLCAP	ENSG00000166619.8	protein_coding	1.67e-09	1.30427	0.927	0.609	9.68e-05
TAOK1	ENSG00000160551.5	protein_coding	1.71e-09	0.825387	0.982	0.718	9.91e-05
FEZ2	ENSG00000171055.10	protein_coding	1.74e-09	0.763863	0.782	0.391	0.000100372
AGA	ENSG00000038002.4	protein_coding	1.8e-09	0.320586	0.745	0.312	0.000104071
RWDD2A	ENSG00000013392.6	protein_coding	1.85e-09	1.0392	0.545	0.191	0.000106792
CD274	ENSG00000120217.9	protein_coding	1.86e-09	1.09335	0.4	0.108	0.000107543
KRAS	ENSG00000133703.7	protein_coding	1.89e-09	0.919701	1	0.651	0.000109113
RAB22A	ENSG00000124209.3	protein_coding	1.96e-09	1.02171	0.927	0.641	0.000113216
TOX3	ENSG00000103460.12	protein_coding	2e-09	0.679349	0.6	0.223	0.000115777
RNF187	ENSG00000168159.9	protein_coding	2.01e-09	0.96854	0.891	0.531	0.000116222
TNFRSF11B	ENSG00000164761.4	protein_coding	2.04e-09	1.2712	0.273	0.051	0.000118023
U3	ENSG00000265369.2	lincRNA	2.06e-09	1.79954	0.273	0.053	0.000118822
FAM222B	ENSG00000173065.9	protein_coding	2.12e-09	0.698045	0.836	0.416	0.000122437
MT-ND6	ENSG00000198695.2	protein_coding	2.14e-09	0.646297	1	1	0.000123735
ZSWIM6	ENSG00000130449.5	protein_coding	2.15e-09	0.47691	0.818	0.412	0.000124105
UBE2O	ENSG00000175931.8	protein_coding	2.15e-09	0.69773	0.727	0.347	0.000124425
ASPH	ENSG00000198363.11	protein_coding	2.18e-09	0.632841	0.964	0.613	0.000126011
RPL21	ENSG00000122026.6	protein_coding	2.2e-09	-0.631167	1	0.994	0.000127195
CDH1	ENSG00000039068.14	protein_coding	2.2e-09	0.734662	0.964	0.724	0.000127235
PARM1	ENSG00000169116.7	protein_coding	2.23e-09	1.1454	0.564	0.217	0.000129162
AEN	ENSG00000181026.13	protein_coding	2.33e-09	0.944277	0.8	0.377	0.000134966
PRPSAP1	ENSG00000161542.12	protein_coding	2.45e-09	0.613839	0.709	0.294	0.000141912
MARVELD3	ENSG00000140832.5	protein_coding	2.52e-09	0.769798	0.691	0.298	0.000145672
DHX33	ENSG00000005100.8	protein_coding	2.53e-09	0.568699	0.764	0.351	0.000146432
HSP90AB3P	ENSG00000183199.6	pseudogene	2.58e-09	0.52823	1	0.903	0.000148969
RPS8	ENSG00000142937.7	protein_coding	2.59e-09	-0.716382	1	0.988	0.000150019
CPT1A	ENSG00000110090.8	protein_coding	2.73e-09	0.376145	0.927	0.493	0.000157652
CTTNBP2NL	ENSG00000143079.10	protein_coding	2.74e-09	0.328146	0.745	0.327	0.000158158
FRMD8	ENSG00000126391.9	protein_coding	2.79e-09	-1.77917	0.273	0.647	0.00016143
BMI1	ENSG00000168283.9	protein_coding	2.8e-09	0.557397	0.855	0.448	0.000161745
SEC24C	ENSG00000176986.10	protein_coding	2.8e-09	0.63948	0.873	0.515	0.000162013
NUS1	ENSG00000153989.7	protein_coding	2.82e-09	1.04696	0.818	0.467	0.000162775
EXOC2	ENSG00000112685.9	protein_coding	2.85e-09	0.391982	0.782	0.345	0.000165046
CDYL	ENSG00000153046.13	protein_coding	2.89e-09	0.903306	0.818	0.505	0.000167036
ZBTB33	ENSG00000177485.6	protein_coding	3.03e-09	0.842285	0.673	0.292	0.000175103
CREB3L1	ENSG00000157613.6	protein_coding	3.12e-09	0.299734	0.418	0.118	0.000180525
RPN2	ENSG00000118705.12	protein_coding	3.19e-09	0.795517	0.982	0.931	0.000184358
TLDC1	ENSG00000140950.11	protein_coding	3.2e-09	0.931413	0.473	0.15	0.000185228
CDR2	ENSG00000140743.3	protein_coding	3.22e-09	0.547813	0.873	0.428	0.00018601
TP53RK	ENSG00000172315.5	protein_coding	3.26e-09	1.4186	0.564	0.217	0.000188442
ADORA2B	ENSG00000170425.3	protein_coding	3.34e-09	1.77736	0.255	0.047	0.000193099
ITPR2	ENSG00000123104.7	protein_coding	3.46e-09	-2.81063	0.273	0.641	0.000200329
YOD1	ENSG00000180667.6	protein_coding	3.51e-09	0.398005	0.8	0.379	0.00020282
POTEF	ENSG00000196604.7	protein_coding	3.74e-09	0.695835	0.382	0.11	0.00021615
RPL3	ENSG00000100316.11	protein_coding	3.76e-09	-0.78278	1	0.998	0.000217523
FAHD1	ENSG00000180185.7	protein_coding	3.85e-09	0.844542	0.764	0.343	0.000222515
MAGED2	ENSG00000102316.12	protein_coding	3.87e-09	0.744026	0.982	0.68	0.000223993
GOLGA8B	ENSG00000215252.7	protein_coding	3.95e-09	-2.153	0.255	0.669	0.000228596
LDLR	ENSG00000130164.7	protein_coding	3.99e-09	0.327107	0.964	0.582	0.000230622
LTBR	ENSG00000111321.6	protein_coding	4.1e-09	0.577844	0.782	0.373	0.000237245
CTD-2349P21.10	ENSG00000265791.1	sense_intronic	4.18e-09	0.529221	0.291	0.057	0.000241557
MT-ATP6	ENSG00000198899.2	protein_coding	4.24e-09	0.683174	1	1	0.000245114
PAX9	ENSG00000198807.8	protein_coding	4.24e-09	0.833184	0.491	0.152	0.000245231
TMEM189	ENSG00000240849.6	protein_coding	4.48e-09	0.848392	0.945	0.59	0.000259036
MIS12	ENSG00000167842.11	protein_coding	4.57e-09	1.18595	0.618	0.243	0.000264236
CPNE2	ENSG00000140848.12	protein_coding	4.62e-09	0.546169	0.455	0.142	0.000267226
YIPF3	ENSG00000137207.7	protein_coding	4.66e-09	0.989403	0.945	0.639	0.000269256
PPP3CA	ENSG00000138814.12	protein_coding	4.83e-09	0.801581	1	0.765	0.000279113
RPS26	ENSG00000197728.5	protein_coding	4.92e-09	-0.911668	0.891	0.955	0.000284524
RCN1	ENSG00000049449.4	protein_coding	4.93e-09	0.441699	0.891	0.422	0.000285116
SERPINA1	ENSG00000197249.8	protein_coding	4.95e-09	0.459372	0.473	0.15	0.000286238
FOS	ENSG00000170345.5	protein_coding	5.01e-09	-1.97904	0.873	0.933	0.000289427
SET	ENSG00000119335.12	protein_coding	5.07e-09	-1.0583	1	0.99	0.000292986
TDP2	ENSG00000111802.9	protein_coding	5.09e-09	1.4989	0.727	0.369	0.00029438
GAREM	ENSG00000141441.11	protein_coding	5.13e-09	0.544459	0.618	0.233	0.000296332
CTC-534A2.2	ENSG00000253251.2	protein_coding	5.14e-09	0.675019	0.4	0.105	0.000297316
SPECC1	ENSG00000128487.12	protein_coding	5.32e-09	0.368927	0.673	0.284	0.000307493
VEZF1	ENSG00000136451.4	protein_coding	5.37e-09	0.664981	0.964	0.643	0.000310313
TCF7L1	ENSG00000152284.4	protein_coding	5.37e-09	1.00317	0.509	0.183	0.000310593
LRRK2	ENSG00000188906.9	protein_coding	5.4e-09	0.642856	0.527	0.178	0.000312223
COBL	ENSG00000106078.13	protein_coding	5.46e-09	1.31153	0.764	0.367	0.000315747
KLF11	ENSG00000172059.6	protein_coding	5.49e-09	1.054	0.509	0.172	0.000317239
TMTC4	ENSG00000125247.11	protein_coding	5.49e-09	0.877209	0.564	0.201	0.000317418
BTN2A1	ENSG00000112763.11	protein_coding	5.58e-09	0.319326	0.8	0.408	0.000322664
RP11-572P18.1	ENSG00000220842.5	pseudogene	5.67e-09	-0.685294	0.964	0.972	0.000327928
GSTK1	ENSG00000197448.9	protein_coding	5.71e-09	-1.62852	0.691	0.83	0.000330123
CANT1	ENSG00000171302.12	protein_coding	5.73e-09	0.861413	0.745	0.375	0.000331061
RSPH3	ENSG00000130363.7	protein_coding	5.8e-09	0.500099	0.636	0.258	0.000335141
SF3B2	ENSG00000087365.10	protein_coding	5.82e-09	0.835534	1	0.854	0.00033636
C6orf120	ENSG00000185127.5	protein_coding	6.01e-09	1.01923	0.727	0.339	0.000347752
MT1F	ENSG00000198417.5	protein_coding	6.07e-09	0.569514	0.709	0.28	0.00035114
C7orf60	ENSG00000164603.7	protein_coding	6.09e-09	0.769128	0.455	0.15	0.00035186
DSC2	ENSG00000134755.10	protein_coding	6.19e-09	0.411168	0.891	0.481	0.000357627
BTBD3	ENSG00000132640.10	protein_coding	6.2e-09	0.732443	0.636	0.243	0.000358765
PTPLB	ENSG00000206527.5	protein_coding	6.33e-09	0.609541	0.964	0.544	0.000365982
CXCL16	ENSG00000161921.10	protein_coding	6.47e-09	0.501376	0.636	0.247	0.000374213
FOSB	ENSG00000125740.9	protein_coding	6.53e-09	-2.1376	0.673	0.842	0.000377391
FOXA1	ENSG00000129514.4	protein_coding	6.58e-09	0.462777	0.964	0.521	0.000380621
HPCAL1	ENSG00000115756.8	protein_coding	6.6e-09	0.447152	0.6	0.237	0.000381732
FXYD5	ENSG00000089327.10	protein_coding	6.76e-09	-2.88378	0.182	0.578	0.000390776
CCL4L1	ENSG00000205020.7	protein_coding	6.8e-09	-1.14012	0.545	0.181	0.000393159
ACOX2	ENSG00000168306.8	protein_coding	6.98e-09	1.16865	0.309	0.069	0.000403625
ARPC4	ENSG00000241553.8	protein_coding	7.05e-09	-1.00461	0.927	0.933	0.000407645
PPDPF	ENSG00000125534.5	protein_coding	7.34e-09	0.649612	0.855	0.519	0.000424223
ZNF789	ENSG00000198556.9	protein_coding	7.42e-09	1.06743	0.545	0.203	0.00042926
MAFF	ENSG00000185022.7	protein_coding	7.47e-09	0.378322	0.891	0.469	0.000431825
LGALSL	ENSG00000119862.8	protein_coding	7.59e-09	0.810918	0.709	0.318	0.000438843
YWHAQ	ENSG00000134308.9	protein_coding	7.72e-09	0.737074	1	0.886	0.000446513
BHLHE40	ENSG00000134107.4	protein_coding	7.82e-09	-2.21508	0.564	0.791	0.000451995
SYT17	ENSG00000103528.12	protein_coding	7.99e-09	0.994611	0.436	0.126	0.000462105
BEND7	ENSG00000165626.12	protein_coding	8.06e-09	0.88129	0.4	0.114	0.000466108
FADS2	ENSG00000134824.9	protein_coding	8.21e-09	1.06691	0.618	0.235	0.000474483
CCNC	ENSG00000112237.8	protein_coding	8.23e-09	0.919663	1	0.765	0.000475773
KIF1B	ENSG00000054523.12	protein_coding	8.26e-09	0.378687	0.873	0.507	0.000477482
CEP68	ENSG00000011523.9	protein_coding	8.28e-09	0.612239	0.673	0.312	0.000478567
PTPRK	ENSG00000152894.10	protein_coding	8.3e-09	0.463286	0.873	0.454	0.000479698
ATP5E	ENSG00000124172.5	protein_coding	8.31e-09	0.715418	1	0.957	0.000480445
MAP3K7	ENSG00000135341.13	protein_coding	8.44e-09	0.973234	0.745	0.383	0.000487918
PDIA3	ENSG00000167004.8	protein_coding	8.44e-09	0.683828	1	0.888	0.000488014
TBC1D10B	ENSG00000169221.9	protein_coding	8.45e-09	1.30886	0.618	0.276	0.000488829
PLEKHF2	ENSG00000175895.3	protein_coding	8.52e-09	0.988892	0.964	0.629	0.000492346
AC005077.12	ENSG00000227038.2	pseudogene	8.67e-09	0.751629	0.309	0.073	0.000501561
AC009948.5	ENSG00000223960.2	antisense	8.75e-09	0.684867	0.655	0.254	0.000505964
AFG3L1P	ENSG00000223959.4	pseudogene	8.84e-09	0.755455	0.618	0.235	0.00051117
CHD7	ENSG00000171316.7	protein_coding	8.85e-09	0.988593	0.964	0.631	0.000511448
RP11-157P1.4	ENSG00000226332.2	antisense	8.85e-09	1.19433	0.255	0.049	0.000511825
ROCK2	ENSG00000134318.9	protein_coding	8.94e-09	0.559418	0.982	0.69	0.000516759
NEDD9	ENSG00000111859.12	protein_coding	8.94e-09	0.436131	0.891	0.515	0.000517124
MXI1	ENSG00000119950.16	protein_coding	9.04e-09	0.527095	0.873	0.446	0.000522901
ZNF766	ENSG00000196214.6	protein_coding	9.14e-09	0.787971	0.782	0.396	0.00052876
CDC42BPA	ENSG00000143776.14	protein_coding	9.16e-09	0.447534	0.818	0.414	0.000529911
PAWR	ENSG00000177425.6	protein_coding	9.18e-09	0.476368	0.945	0.641	0.0005308
PPM1B	ENSG00000138032.16	protein_coding	9.31e-09	0.286255	0.909	0.491	0.000538222
GOSR1	ENSG00000108587.10	protein_coding	9.43e-09	0.759161	0.982	0.702	0.000545461
SMAD5	ENSG00000113658.12	protein_coding	9.53e-09	0.955008	0.891	0.509	0.000550873
RGL3	ENSG00000205517.8	protein_coding	9.55e-09	0.999774	0.255	0.047	0.000552262
POM121	ENSG00000196313.7	protein_coding	9.55e-09	0.566992	0.873	0.479	0.000552396
TFAP2A	ENSG00000137203.6	protein_coding	9.72e-09	0.660403	0.927	0.602	0.000561823
SPTBN1	ENSG00000115306.11	protein_coding	9.72e-09	0.835428	0.964	0.797	0.000562039
PGRMC1	ENSG00000101856.8	protein_coding	9.76e-09	0.6645	0.964	0.578	0.000564457
GPR126	ENSG00000112414.10	protein_coding	9.77e-09	0.786249	0.636	0.249	0.000564624
IRX5	ENSG00000176842.10	protein_coding	9.83e-09	0.777455	0.764	0.402	0.000568166
DNAJC5	ENSG00000101152.6	protein_coding	9.83e-09	0.525715	0.727	0.335	0.000568613
P4HA1	ENSG00000122884.8	protein_coding	9.86e-09	1.02179	0.891	0.617	0.000569897
DYNLT1	ENSG00000146425.6	protein_coding	9.91e-09	0.799245	0.982	0.777	0.000572722
PADI2	ENSG00000117115.8	protein_coding	1e-08	0.270802	0.927	0.473	0.000581081
HEY1	ENSG00000164683.12	protein_coding	1.02e-08	1.26557	0.4	0.118	0.000589478
PPARD	ENSG00000112033.9	protein_coding	1.05e-08	0.7268	0.455	0.148	0.00060602
SRGAP1	ENSG00000196935.4	protein_coding	1.07e-08	0.442754	0.818	0.387	0.000619523
MTRF1L	ENSG00000112031.11	protein_coding	1.07e-08	0.965658	0.727	0.353	0.000621121
RAP1GAP	ENSG00000076864.15	protein_coding	1.08e-08	0.57522	0.345	0.089	0.000622104
AC090186.1	ENSG00000232941.1	protein_coding	1.1e-08	-2.36766	0.473	0.728	0.000634158
EEF1G	ENSG00000254772.5	protein_coding	1.1e-08	-1.03828	1	0.98	0.000638498
SDF2L1	ENSG00000128228.4	protein_coding	1.11e-08	0.872655	0.545	0.201	0.000643379
CD9	ENSG00000010278.7	protein_coding	1.12e-08	0.595082	1	0.789	0.000646094
RP11-283I3.6	ENSG00000261799.1	sense_overlapping	1.16e-08	0.829525	0.618	0.262	0.000668656
CACFD1	ENSG00000160325.10	protein_coding	1.16e-08	1.14444	0.473	0.164	0.000672358
RPS27	ENSG00000177954.7	protein_coding	1.2e-08	-0.598384	1	0.992	0.000694767
ZNF614	ENSG00000142556.14	protein_coding	1.21e-08	0.610223	0.527	0.195	0.00069809
RPL15	ENSG00000174748.14	protein_coding	1.23e-08	-0.591684	0.982	0.992	0.000709549
ZNF320	ENSG00000182986.8	protein_coding	1.23e-08	0.413258	0.582	0.219	0.000710737
RP11-457M11.2	ENSG00000233631.2	3prime_overlapping_ncrna	1.23e-08	1.36378	0.291	0.065	0.000711026
GLOD4	ENSG00000167699.9	protein_coding	1.23e-08	0.555266	0.855	0.452	0.000711186
LRRC8B	ENSG00000197147.8	protein_coding	1.24e-08	0.646688	0.8	0.357	0.00071517
UBOX5	ENSG00000185019.12	protein_coding	1.24e-08	1.00808	0.582	0.239	0.000718096
ZFP28	ENSG00000196867.3	protein_coding	1.25e-08	0.877804	0.309	0.071	0.000724841
MIR4458HG	ENSG00000247516.3	lincRNA	1.27e-08	1.44755	0.691	0.343	0.00073187
POM121C	ENSG00000135213.8	protein_coding	1.27e-08	0.946597	0.891	0.533	0.000734793
PCGF1	ENSG00000115289.8	protein_coding	1.28e-08	0.869628	0.709	0.335	0.000739074
RP11-37B2.1	ENSG00000251136.4	lincRNA	1.3e-08	0.671866	0.564	0.215	0.000750625
AFF3	ENSG00000144218.14	protein_coding	1.36e-08	-2.68397	0.036	0.44	0.000786344
HSPA6	ENSG00000173110.6	protein_coding	1.38e-08	1.56664	0.655	0.32	0.00079708
FAM84B	ENSG00000168672.3	protein_coding	1.41e-08	0.802662	0.891	0.487	0.000816487
ARPC1B	ENSG00000130429.8	protein_coding	1.41e-08	-1.44501	0.4	0.74	0.000817196
TMEM127	ENSG00000135956.4	protein_coding	1.42e-08	0.273723	0.873	0.465	0.000818538
MTA3	ENSG00000057935.9	protein_coding	1.42e-08	0.572779	0.945	0.513	0.000823646
HACE1	ENSG00000085382.7	protein_coding	1.44e-08	0.939702	0.509	0.174	0.00083503
TMEM41A	ENSG00000163900.6	protein_coding	1.45e-08	0.722174	0.873	0.535	0.000837916
DNAJC27	ENSG00000115137.7	protein_coding	1.45e-08	0.809395	0.509	0.178	0.000840019
IRGQ	ENSG00000167378.4	protein_coding	1.49e-08	0.721291	0.745	0.379	0.000860433
FUT3	ENSG00000171124.8	protein_coding	1.5e-08	0.56726	0.364	0.097	0.000865549
NT5DC3	ENSG00000111696.7	protein_coding	1.5e-08	0.537477	0.855	0.438	0.000866794
ALG1L	ENSG00000189366.5	protein_coding	1.54e-08	0.816754	0.382	0.103	0.000889738
APOL6	ENSG00000221963.5	protein_coding	1.55e-08	0.571813	0.891	0.471	0.00089836
AC004057.1	ENSG00000196656.6	pseudogene	1.56e-08	-1.02745	0.727	0.89	0.000901814
PAX6	ENSG00000007372.16	protein_coding	1.59e-08	0.380898	0.491	0.158	0.000920928
RNF24	ENSG00000101236.12	protein_coding	1.62e-08	0.64887	0.818	0.44	0.00093799
ZNF470	ENSG00000197016.7	protein_coding	1.64e-08	0.676038	0.345	0.085	0.000946481
TBX3	ENSG00000135111.10	protein_coding	1.66e-08	0.369794	0.836	0.414	0.00096126
DYRK2	ENSG00000127334.10	protein_coding	1.68e-08	0.302868	0.8	0.385	0.000972366
GPR75	ENSG00000119737.5	protein_coding	1.68e-08	0.866117	0.327	0.077	0.000973497
RYBP	ENSG00000163602.9	protein_coding	1.73e-08	0.816774	0.909	0.57	0.00100231
SLC4A1AP	ENSG00000163798.9	protein_coding	1.76e-08	0.648393	0.873	0.509	0.0010179
BAG3	ENSG00000151929.5	protein_coding	1.79e-08	0.692228	0.982	0.663	0.00103224
RP11-110I1.6	ENSG00000255114.1	antisense	1.84e-08	1.1704	0.782	0.45	0.00106437
AFMID	ENSG00000183077.11	protein_coding	1.87e-08	-2.16873	0.4	0.702	0.00108124
MYC	ENSG00000136997.10	protein_coding	1.97e-08	-2.15225	0.291	0.673	0.00113644
PRLR	ENSG00000113494.12	protein_coding	1.99e-08	0.778413	0.891	0.503	0.0011479
VDAC2	ENSG00000165637.9	protein_coding	2.02e-08	0.900075	0.945	0.813	0.00116999
PROSER2	ENSG00000148426.8	protein_coding	2.04e-08	0.825753	0.327	0.081	0.00117858
FSTL4	ENSG00000053108.12	protein_coding	2.04e-08	0.782575	0.291	0.065	0.00117951
MAFG	ENSG00000197063.6	protein_coding	2.04e-08	0.268279	0.727	0.349	0.00118085
SCD	ENSG00000099194.5	protein_coding	2.07e-08	0.436505	1	0.734	0.00119755
PYCR1	ENSG00000183010.12	protein_coding	2.08e-08	0.989397	0.673	0.306	0.00120215
SLC11A2	ENSG00000110911.10	protein_coding	2.09e-08	0.418405	0.891	0.456	0.00120788
RP11-61A14.3	ENSG00000261088.1	lincRNA	2.17e-08	0.538914	0.273	0.057	0.00125672
RAB10	ENSG00000084733.6	protein_coding	2.18e-08	1.03856	0.964	0.722	0.00125946
CLSTN1	ENSG00000171603.12	protein_coding	2.23e-08	0.682735	0.836	0.501	0.00128849
UBQLN2	ENSG00000188021.7	protein_coding	2.24e-08	0.72981	0.764	0.387	0.00129551
VPS35	ENSG00000069329.11	protein_coding	2.28e-08	0.728329	0.982	0.87	0.00131867
NLRC5	ENSG00000140853.11	protein_coding	2.28e-08	0.294521	0.855	0.46	0.00131971
ZBTB46	ENSG00000130584.6	protein_coding	2.28e-08	0.445524	0.509	0.176	0.00132079
EYS	ENSG00000188107.9	protein_coding	2.34e-08	0.96575	0.309	0.075	0.0013504
RP11-361F15.2	ENSG00000225135.1	lincRNA	2.38e-08	0.944874	0.255	0.051	0.00137678
USP49	ENSG00000164663.9	protein_coding	2.44e-08	0.783532	0.436	0.142	0.00141147
ZNF701	ENSG00000167562.7	protein_coding	2.49e-08	0.586229	0.564	0.211	0.00144007
ALDOC	ENSG00000109107.9	protein_coding	2.56e-08	1.11378	0.527	0.205	0.00148006
ABHD11	ENSG00000106077.14	protein_coding	2.59e-08	0.355461	0.909	0.542	0.00150005
LRRC37BP1	ENSG00000250462.4	pseudogene	2.61e-08	1.12399	0.527	0.199	0.00150921
ZNF117	ENSG00000152926.10	protein_coding	2.61e-08	0.771955	0.764	0.402	0.00151186
PRTG	ENSG00000166450.8	protein_coding	2.68e-08	0.320463	0.309	0.073	0.00154786
KIAA0232	ENSG00000170871.7	protein_coding	2.69e-08	0.711541	0.909	0.594	0.00155431
CSNK2A1	ENSG00000101266.12	protein_coding	2.73e-08	0.775861	1	0.779	0.00157776
LDOC1L	ENSG00000188636.3	protein_coding	2.74e-08	0.947076	0.6	0.229	0.00158246
WARS	ENSG00000140105.13	protein_coding	2.75e-08	0.729292	0.964	0.669	0.00159291
HIP1R	ENSG00000130787.9	protein_coding	2.76e-08	0.837973	0.618	0.249	0.00159608
EFCAB4B	ENSG00000130038.5	protein_coding	3.02e-08	0.918876	0.4	0.12	0.00174523
TGIF1	ENSG00000177426.16	protein_coding	3.05e-08	0.662297	0.909	0.546	0.00176251
CTNND2	ENSG00000169862.14	protein_coding	3.08e-08	1.38707	0.255	0.053	0.00178322
MPC1	ENSG00000060762.14	protein_coding	3.15e-08	1.16938	0.818	0.515	0.00182394
SRBD1	ENSG00000068784.8	protein_coding	3.19e-08	0.822209	0.745	0.381	0.00184534
ING2	ENSG00000168556.5	protein_coding	3.28e-08	0.660161	0.509	0.185	0.00189777
CBX2	ENSG00000173894.6	protein_coding	3.31e-08	0.985521	0.418	0.136	0.00191263
MLK4	ENSG00000143674.6	protein_coding	3.37e-08	0.473646	0.455	0.158	0.00194977
CCDC170	ENSG00000120262.8	protein_coding	3.54e-08	2.30009	0.418	0.136	0.00204578
ATM	ENSG00000149311.13	protein_coding	3.63e-08	-1.72787	0.273	0.661	0.00209947
HSPA8	ENSG00000109971.9	protein_coding	3.64e-08	-1.01176	1	0.99	0.0021061
TJP1	ENSG00000104067.12	protein_coding	3.65e-08	0.274904	1	0.619	0.00211036
ZBTB9	ENSG00000213588.4	protein_coding	3.71e-08	0.565107	0.382	0.108	0.00214736
FGF13	ENSG00000129682.9	protein_coding	3.72e-08	0.418645	0.545	0.193	0.00214894
CEBPB	ENSG00000172216.4	protein_coding	3.74e-08	0.648822	0.836	0.483	0.00216292
CTD-2368P22.1	ENSG00000176593.3	protein_coding	3.77e-08	0.683821	0.255	0.051	0.0021814
ZFP1	ENSG00000184517.7	protein_coding	3.84e-08	1.14836	0.4	0.122	0.0022209
TJP2	ENSG00000119139.12	protein_coding	3.86e-08	0.712594	0.727	0.387	0.00223426
P4HA2	ENSG00000072682.14	protein_coding	3.93e-08	0.789426	0.618	0.264	0.00226956
CREB3L2	ENSG00000182158.10	protein_coding	4.01e-08	0.476348	0.909	0.556	0.00231977
MAPK14	ENSG00000112062.6	protein_coding	4.01e-08	0.84889	0.836	0.465	0.00232014
CDK6	ENSG00000105810.5	protein_coding	4.02e-08	0.810349	0.836	0.45	0.00232561
TNFRSF1A	ENSG00000067182.3	protein_coding	4.07e-08	0.39219	0.8	0.426	0.00235334
DXO	ENSG00000204348.5	protein_coding	4.1e-08	0.581185	0.491	0.176	0.00237116
MOGS	ENSG00000115275.7	protein_coding	4.17e-08	0.86117	0.4	0.124	0.00240831
RPL13A	ENSG00000142541.12	protein_coding	4.18e-08	-0.619965	1	0.99	0.00241624
ATG5	ENSG00000057663.8	protein_coding	4.19e-08	0.624628	0.909	0.544	0.0024215
STARD4	ENSG00000164211.8	protein_coding	4.19e-08	1.05975	0.455	0.16	0.00242351
RPL7AP6	ENSG00000242071.2	pseudogene	4.24e-08	-0.93586	0.545	0.817	0.0024499
KIAA0195	ENSG00000177728.10	protein_coding	4.24e-08	0.606277	0.564	0.217	0.00245275
RPS11	ENSG00000142534.2	protein_coding	4.26e-08	-0.615818	1	0.984	0.00246571
STXBP5	ENSG00000164506.10	protein_coding	4.28e-08	0.87022	0.673	0.308	0.002472
SRP68	ENSG00000167881.10	protein_coding	4.3e-08	0.896475	0.8	0.434	0.00248816
F2RL1	ENSG00000164251.4	protein_coding	4.34e-08	1.49498	0.309	0.077	0.00250876
TRAPPC12	ENSG00000171853.11	protein_coding	4.34e-08	0.422549	0.6	0.241	0.00251016
OCRL	ENSG00000122126.11	protein_coding	4.4e-08	1.09799	0.527	0.203	0.00254195
KIAA0947	ENSG00000164151.7	protein_coding	4.55e-08	0.580867	0.909	0.475	0.00263307
RNF167	ENSG00000108523.11	protein_coding	4.57e-08	0.852401	0.818	0.467	0.00264255
AUH	ENSG00000148090.7	protein_coding	4.58e-08	1.28455	0.473	0.16	0.00264745
ACSS2	ENSG00000131069.15	protein_coding	4.6e-08	1.39017	0.418	0.14	0.00265881
N4BP1	ENSG00000102921.3	protein_coding	4.62e-08	1.02946	0.8	0.495	0.0026708
QKI	ENSG00000112531.12	protein_coding	4.7e-08	0.915109	0.964	0.708	0.00271774
HSD17B12	ENSG00000149084.7	protein_coding	4.74e-08	-2.09833	0.255	0.613	0.00273827
DIP2C	ENSG00000151240.11	protein_coding	4.75e-08	0.250842	0.564	0.205	0.00274557
GJB2	ENSG00000165474.5	protein_coding	4.82e-08	0.739068	0.255	0.053	0.0027849
RIMKLB	ENSG00000166532.11	protein_coding	4.85e-08	0.705812	0.818	0.448	0.00280188
ZNF384	ENSG00000126746.13	protein_coding	5.05e-08	0.885483	0.836	0.465	0.00292007
KRT80	ENSG00000167767.9	protein_coding	5.11e-08	0.741906	0.455	0.152	0.00295231
CPEB3	ENSG00000107864.10	protein_coding	5.14e-08	0.709486	0.6	0.258	0.00297237
TNFRSF10B	ENSG00000120889.8	protein_coding	5.17e-08	0.58902	0.764	0.369	0.00298876
CHURC1	ENSG00000258289.3	protein_coding	5.21e-08	-1.46079	0.764	0.83	0.00301372
UCP2	ENSG00000175567.4	protein_coding	5.26e-08	-2.15318	0.491	0.732	0.00304316
HCG18	ENSG00000231074.4	antisense	5.36e-08	0.518339	0.909	0.521	0.00309814
TOP1	ENSG00000198900.5	protein_coding	5.52e-08	0.795704	1	0.895	0.00318936
RP13-188A5.1	ENSG00000227486.1	lincRNA	5.54e-08	0.403464	0.436	0.142	0.00320079
FMN1	ENSG00000248905.4	protein_coding	5.55e-08	0.50783	0.545	0.213	0.00321015
HIC2	ENSG00000169635.5	protein_coding	5.58e-08	0.297715	0.345	0.093	0.00322826
DUSP16	ENSG00000111266.4	protein_coding	5.6e-08	1.39728	0.655	0.331	0.00323939
GOLT1B	ENSG00000111711.5	protein_coding	5.61e-08	0.806873	0.964	0.613	0.0032461
ZNF577	ENSG00000161551.8	protein_coding	5.62e-08	0.488296	0.436	0.134	0.00325175
SLC12A2	ENSG00000064651.9	protein_coding	5.68e-08	0.600609	0.982	0.787	0.00328152
ECT2L	ENSG00000203734.7	protein_coding	5.72e-08	0.623621	0.382	0.11	0.0033088
RAP1GAP2	ENSG00000132359.9	protein_coding	5.86e-08	0.506571	0.364	0.101	0.00338693
KLHL2	ENSG00000109466.9	protein_coding	6.02e-08	0.40941	0.527	0.213	0.00347802
RNF145	ENSG00000145860.7	protein_coding	6.08e-08	0.477058	0.8	0.422	0.00351555
RAB1A	ENSG00000138069.12	protein_coding	6.14e-08	0.77817	1	0.842	0.00355137
GRHL3	ENSG00000158055.11	protein_coding	6.17e-08	0.797033	0.291	0.069	0.00356502
TSPAN6	ENSG00000000003.10	protein_coding	6.17e-08	0.88545	0.782	0.414	0.003569
SLC39A7	ENSG00000112473.12	protein_coding	6.23e-08	1.04772	0.764	0.462	0.00360474
TOMM34	ENSG00000025772.7	protein_coding	6.49e-08	0.91029	0.764	0.446	0.00375166
CTD-3162L10.1	ENSG00000267053.2	lincRNA	6.58e-08	0.719591	0.255	0.053	0.00380599
CALM2	ENSG00000143933.12	protein_coding	6.61e-08	0.507949	1	0.99	0.00382287
VPS53	ENSG00000141252.15	protein_coding	6.71e-08	0.445322	0.873	0.509	0.00388066
PPP2R1A	ENSG00000105568.13	protein_coding	6.79e-08	0.560126	0.982	0.738	0.00392454
DHRS7B	ENSG00000109016.13	protein_coding	6.8e-08	0.394034	0.655	0.288	0.00393352
HLA-B	ENSG00000234745.5	protein_coding	7e-08	0.455936	1	0.848	0.00404519
THAP11	ENSG00000168286.1	protein_coding	7.04e-08	1.55838	0.509	0.203	0.00406968
UHRF1BP1	ENSG00000065060.12	protein_coding	7.13e-08	0.59811	0.655	0.302	0.00412521
RP11-396K3.1	ENSG00000233369.3	pseudogene	7.19e-08	0.852784	0.509	0.195	0.00415702
ITGA6	ENSG00000091409.10	protein_coding	7.26e-08	0.368599	0.6	0.247	0.00420004
TBC1D22B	ENSG00000065491.8	protein_coding	7.28e-08	0.533351	0.491	0.17	0.00421158
AKAP17A	ENSG00000197976.6	protein_coding	7.29e-08	0.577713	0.909	0.619	0.00421554
MYO6	ENSG00000196586.9	protein_coding	7.31e-08	0.657987	0.982	0.742	0.0042282
L3MBTL1	ENSG00000185513.10	protein_coding	7.31e-08	0.446059	0.255	0.053	0.00422858
WLS	ENSG00000116729.9	protein_coding	7.36e-08	0.66767	0.345	0.093	0.00425714
CRIP1	ENSG00000213145.5	protein_coding	7.37e-08	-2.33623	0.309	0.631	0.00426379
NDUFA13	ENSG00000186010.14	protein_coding	7.4e-08	-0.771879	0.909	0.933	0.00427788
RP11-706O15.7	ENSG00000205662.2	lincRNA	7.48e-08	1.00173	0.255	0.053	0.00432317
SRSF12	ENSG00000154548.8	protein_coding	7.48e-08	1.22704	0.273	0.061	0.00432424
RNF19A	ENSG00000034677.7	protein_coding	7.52e-08	0.492543	1	0.815	0.00434816
MGLL	ENSG00000074416.9	protein_coding	7.56e-08	0.410508	0.764	0.398	0.00437193
HELZ	ENSG00000198265.7	protein_coding	7.65e-08	0.490899	0.982	0.761	0.00442409
PHACTR4	ENSG00000204138.8	protein_coding	8.14e-08	0.557079	0.891	0.576	0.00470864
COX6A1	ENSG00000111775.2	protein_coding	8.16e-08	-0.673185	0.982	0.953	0.00472004
KAT6B	ENSG00000156650.8	protein_coding	8.17e-08	0.633336	0.982	0.671	0.00472284
REEP4	ENSG00000168476.7	protein_coding	8.19e-08	0.584605	0.4	0.12	0.00473435
KDM5A	ENSG00000073614.7	protein_coding	8.2e-08	0.418296	1	0.84	0.00473861
FRMD6	ENSG00000139926.11	protein_coding	8.33e-08	0.50872	0.673	0.314	0.00481461
FTLP14	ENSG00000260459.2	pseudogene	8.33e-08	1.33347	0.309	0.079	0.00481504
UGP2	ENSG00000169764.10	protein_coding	8.49e-08	0.604117	1	0.698	0.00491118
CTSH	ENSG00000103811.11	protein_coding	8.52e-08	-1.82888	0.218	0.582	0.00492521
VAPB	ENSG00000124164.11	protein_coding	8.57e-08	0.629021	0.818	0.442	0.00495806
ELOVL6	ENSG00000170522.5	protein_coding	8.59e-08	0.725426	0.582	0.239	0.00496435
DNAJC21	ENSG00000168724.10	protein_coding	8.67e-08	1.00935	0.891	0.588	0.00501073
NDUFS6	ENSG00000145494.7	protein_coding	8.71e-08	0.741932	0.964	0.68	0.00503755
RP11-388M20.2	ENSG00000261385.1	antisense	8.77e-08	0.990824	0.473	0.17	0.00506984
TAB2	ENSG00000055208.13	protein_coding	8.79e-08	0.583021	0.945	0.728	0.00508526
SBSPON	ENSG00000164764.10	protein_coding	8.81e-08	1.11352	0.364	0.11	0.00509179
RP11-392P7.6	ENSG00000247498.5	antisense	8.82e-08	0.991739	0.291	0.071	0.00509687
MAN2B2	ENSG00000013288.4	protein_coding	8.85e-08	0.702093	0.582	0.278	0.00511603
ZNF610	ENSG00000167554.10	protein_coding	8.98e-08	0.990212	0.273	0.061	0.0051914
ARHGAP29	ENSG00000137962.8	protein_coding	9.09e-08	1.09106	0.8	0.523	0.00525541
ZFHX3	ENSG00000140836.10	protein_coding	9.14e-08	0.485498	0.873	0.572	0.0052865
DDX50P1	ENSG00000229816.1	pseudogene	9.29e-08	0.721403	0.273	0.065	0.00537383
OS9	ENSG00000135506.11	protein_coding	9.31e-08	0.694663	0.891	0.655	0.00538101
TSN	ENSG00000211460.7	protein_coding	9.31e-08	0.492919	0.945	0.546	0.00538334
MON1B	ENSG00000103111.10	protein_coding	9.51e-08	0.421651	0.818	0.458	0.00549659
PSME4	ENSG00000068878.10	protein_coding	1e-07	0.536044	1	0.805	0.00579172
DAZAP1	ENSG00000071626.12	protein_coding	1.03e-07	0.667761	0.745	0.434	0.00594271
LINC00909	ENSG00000264247.1	lincRNA	1.03e-07	0.595999	0.564	0.225	0.00594912
FADD	ENSG00000168040.4	protein_coding	1.05e-07	0.49489	0.382	0.114	0.00608261
CGN	ENSG00000143375.10	protein_coding	1.06e-07	0.545128	0.691	0.323	0.00612511
ZDHHC7	ENSG00000153786.8	protein_coding	1.06e-07	0.396817	0.618	0.27	0.00613036
HSPB1	ENSG00000106211.8	protein_coding	1.06e-07	0.511888	0.982	0.775	0.0061344
SHPRH	ENSG00000146414.11	protein_coding	1.06e-07	0.911445	0.836	0.493	0.00615245
FAM8A1	ENSG00000137414.5	protein_coding	1.11e-07	0.375238	0.673	0.288	0.00640848
TSPAN14	ENSG00000108219.10	protein_coding	1.13e-07	0.676879	0.909	0.671	0.00654359
NDUFC2	ENSG00000151366.8	protein_coding	1.15e-07	-1.54353	0.709	0.854	0.00665666
CCNG1	ENSG00000113328.14	protein_coding	1.21e-07	0.685928	0.855	0.489	0.00697733
MLLT3	ENSG00000171843.11	protein_coding	1.21e-07	-2.20668	0.073	0.456	0.00701117
FAM199X	ENSG00000123575.8	protein_coding	1.21e-07	0.884235	0.782	0.428	0.00701332
RP11-497H16.9	ENSG00000269983.1	lincRNA	1.21e-07	1.30951	0.345	0.097	0.00701479
BRPF3	ENSG00000096070.15	protein_coding	1.22e-07	0.282313	0.691	0.327	0.00706065
CLPTM1L	ENSG00000049656.9	protein_coding	1.22e-07	0.875349	0.873	0.556	0.00707287
NRAS	ENSG00000213281.4	protein_coding	1.23e-07	0.52059	0.873	0.438	0.00709085
ZNF329	ENSG00000181894.10	protein_coding	1.23e-07	1.86603	0.327	0.093	0.00713322
CECR5	ENSG00000069998.8	protein_coding	1.25e-07	0.769732	0.564	0.235	0.00720007
RPS14	ENSG00000164587.7	protein_coding	1.27e-07	-0.632269	1	0.982	0.0073157
STON2	ENSG00000140022.5	protein_coding	1.27e-07	0.831791	0.436	0.148	0.00731987
ABCA4	ENSG00000198691.7	protein_coding	1.27e-07	1.25779	0.273	0.067	0.00736224
PRKCI	ENSG00000163558.8	protein_coding	1.28e-07	0.827403	0.745	0.394	0.00739494
LTV1	ENSG00000135521.8	protein_coding	1.28e-07	0.602794	0.964	0.588	0.00740473
CACNG4	ENSG00000075461.5	protein_coding	1.28e-07	0.359141	0.273	0.061	0.00742027
MT2A	ENSG00000125148.6	protein_coding	1.29e-07	0.308499	1	0.751	0.00748523
SH3BGRL3	ENSG00000142669.9	protein_coding	1.31e-07	-0.989104	0.909	0.939	0.0075988
SLC25A4	ENSG00000151729.6	protein_coding	1.33e-07	0.480005	0.673	0.296	0.00771516
HIST1H1E	ENSG00000168298.4	protein_coding	1.34e-07	0.519661	0.909	0.487	0.00772385
SERTAD4	ENSG00000082497.7	protein_coding	1.34e-07	0.485738	0.691	0.316	0.00773162
E2F3	ENSG00000112242.10	protein_coding	1.34e-07	0.588056	0.673	0.329	0.00775568
SERPINH1	ENSG00000149257.9	protein_coding	1.35e-07	0.602034	0.745	0.387	0.00778072
MS4A1	ENSG00000156738.13	protein_coding	1.36e-07	-5.48802	0.055	0.424	0.00788373
OSBPL2	ENSG00000130703.11	protein_coding	1.38e-07	0.593377	0.873	0.517	0.00795814
RALGAPB	ENSG00000170471.10	protein_coding	1.4e-07	0.611983	0.855	0.588	0.00807351
HSPBP1	ENSG00000133265.6	protein_coding	1.4e-07	0.784699	0.545	0.225	0.00808049
PTP4A1	ENSG00000112245.6	protein_coding	1.4e-07	0.502401	1	0.842	0.00810972
EPS8	ENSG00000151491.8	protein_coding	1.41e-07	0.573491	0.818	0.414	0.00815868
DSTYK	ENSG00000133059.12	protein_coding	1.42e-07	0.480885	0.745	0.391	0.00818277
PTOV1	ENSG00000104960.11	protein_coding	1.42e-07	1.25941	0.782	0.491	0.00821001
KRT18	ENSG00000111057.6	protein_coding	1.44e-07	0.473965	1	0.759	0.00832613
STAU1	ENSG00000124214.15	protein_coding	1.47e-07	0.701487	1	0.842	0.00847474
CHN2	ENSG00000106069.16	protein_coding	1.47e-07	0.622234	0.418	0.148	0.00848653
RNF130	ENSG00000113269.9	protein_coding	1.47e-07	0.705472	0.727	0.402	0.00850048
TCF4	ENSG00000196628.9	protein_coding	1.49e-07	-3.61433	0.145	0.493	0.00859782
RP11-697M17.2	ENSG00000253712.1	lincRNA	1.5e-07	1.05975	0.291	0.077	0.0086691
USP43	ENSG00000154914.12	protein_coding	1.51e-07	0.405454	0.545	0.227	0.00871774
PCDHB2	ENSG00000112852.4	protein_coding	1.52e-07	0.765629	0.327	0.093	0.00876572
C6orf211	ENSG00000146476.6	protein_coding	1.52e-07	0.823058	0.818	0.475	0.00877908
HSD17B11	ENSG00000198189.6	protein_coding	1.55e-07	0.372951	0.545	0.211	0.00897153
CDCA5	ENSG00000146670.5	protein_coding	1.55e-07	0.813967	0.545	0.213	0.00897481
PHF12	ENSG00000109118.9	protein_coding	1.57e-07	0.714121	0.8	0.422	0.00907261
SPAG4	ENSG00000061656.5	protein_coding	1.57e-07	1.68827	0.345	0.105	0.00909951
TRERF1	ENSG00000124496.8	protein_coding	1.58e-07	0.843886	0.673	0.331	0.00914089
C5orf45	ENSG00000161010.10	protein_coding	1.61e-07	0.408867	0.982	0.734	0.00932062
ZSCAN12	ENSG00000158691.10	protein_coding	1.62e-07	1.00994	0.291	0.073	0.0093631
ACVR2A	ENSG00000121989.10	protein_coding	1.64e-07	0.818864	0.764	0.42	0.00949589
RP11-203B9.4	ENSG00000226803.3	antisense	1.68e-07	1.12255	0.4	0.134	0.00970392
OSGIN2	ENSG00000164823.5	protein_coding	1.7e-07	0.359484	0.727	0.373	0.009845
MIPOL1	ENSG00000151338.14	protein_coding	1.71e-07	0.819698	0.527	0.215	0.00988358
ERC1	ENSG00000082805.15	protein_coding	1.72e-07	0.74155	0.909	0.554	0.00994374
ZNF274	ENSG00000171606.13	protein_coding	1.74e-07	0.794914	0.6	0.266	0.0100807
ZNRF1	ENSG00000186187.7	protein_coding	1.75e-07	0.741791	0.727	0.379	0.0100923
RHOQ	ENSG00000119729.6	protein_coding	1.78e-07	0.609317	0.891	0.546	0.0102875
CTB-31O20.2	ENSG00000261526.1	lincRNA	1.78e-07	1.4211	0.255	0.057	0.0103135
FLOT1	ENSG00000137312.10	protein_coding	1.79e-07	0.598307	0.891	0.519	0.0103296
CDC5L	ENSG00000096401.7	protein_coding	1.79e-07	0.736727	0.964	0.797	0.0103535
TAPBPL	ENSG00000139192.7	protein_coding	1.81e-07	0.417617	0.527	0.207	0.0104697
FAM83H-AS1	ENSG00000203499.6	lincRNA	1.83e-07	0.620395	0.673	0.296	0.0105539
HYAL2	ENSG00000068001.9	protein_coding	1.83e-07	0.784142	0.364	0.112	0.0105644
SCARB2	ENSG00000138760.4	protein_coding	1.83e-07	0.60127	0.945	0.619	0.0105799
SRPK1	ENSG00000096063.10	protein_coding	1.85e-07	0.815984	0.945	0.661	0.0106812
NHSL1	ENSG00000135540.7	protein_coding	1.86e-07	0.575652	0.873	0.462	0.0107477
MAP7	ENSG00000135525.14	protein_coding	1.88e-07	0.551864	0.873	0.491	0.0108456
SPRY2	ENSG00000136158.6	protein_coding	1.88e-07	0.569992	0.345	0.099	0.0108493
ABHD17C	ENSG00000136379.7	protein_coding	1.89e-07	0.366604	0.636	0.28	0.0109224
RPL31	ENSG00000071082.6	protein_coding	1.92e-07	-0.652186	0.982	0.98	0.0111204
API5	ENSG00000166181.8	protein_coding	1.94e-07	-1.8785	0.4	0.692	0.0111958
RPLP1	ENSG00000137818.7	protein_coding	1.94e-07	-0.523624	1	0.988	0.0112296
WDR59	ENSG00000103091.10	protein_coding	1.96e-07	0.615856	0.745	0.363	0.0113547
AC005152.2	ENSG00000234899.5	processed_transcript	1.97e-07	0.969023	0.255	0.057	0.0113947
RPS20	ENSG00000008988.5	protein_coding	1.97e-07	-0.69359	0.945	0.97	0.0114157
SESN3	ENSG00000149212.6	protein_coding	2.01e-07	-2.20586	0.073	0.432	0.011608
RYK	ENSG00000163785.8	protein_coding	2.02e-07	0.863631	0.855	0.535	0.0116679
AC141586.5	ENSG00000215154.2	pseudogene	2.02e-07	0.709743	0.782	0.434	0.0116731
SEC31A	ENSG00000138674.12	protein_coding	2.02e-07	0.724311	1	0.89	0.0116853
MPHOSPH10	ENSG00000124383.4	protein_coding	2.03e-07	0.760506	0.982	0.728	0.0117329
MARCKS	ENSG00000155130.5	protein_coding	2.06e-07	0.566277	1	0.704	0.0119017
ATP8B1	ENSG00000081923.6	protein_coding	2.06e-07	0.64388	0.8	0.483	0.0119083
WASL	ENSG00000106299.7	protein_coding	2.08e-07	0.784103	0.855	0.562	0.0120164
TNFRSF12A	ENSG00000006327.9	protein_coding	2.09e-07	0.588344	0.745	0.361	0.0120613
BAG5	ENSG00000166170.9	protein_coding	2.12e-07	1.01652	0.873	0.584	0.0122311
ATL2	ENSG00000119787.9	protein_coding	2.13e-07	0.441815	0.855	0.481	0.0123032
SLFN5	ENSG00000166750.5	protein_coding	2.15e-07	-0.463549	0.818	0.394	0.0124394
SDHA	ENSG00000073578.12	protein_coding	2.15e-07	0.664337	0.909	0.598	0.012445
AARS	ENSG00000090861.11	protein_coding	2.15e-07	0.832681	0.782	0.424	0.0124518
FGFRL1	ENSG00000127418.10	protein_coding	2.17e-07	0.327196	0.327	0.091	0.0125464
RPL5	ENSG00000122406.8	protein_coding	2.22e-07	-0.723603	1	0.986	0.0128534
ZDHHC9	ENSG00000188706.8	protein_coding	2.23e-07	0.507039	0.782	0.396	0.0128729
COX7C	ENSG00000127184.6	protein_coding	2.24e-07	-0.743776	0.964	0.949	0.0129565
RNPS1	ENSG00000205937.7	protein_coding	2.25e-07	0.581239	1	0.87	0.0130034
LAPTM4B	ENSG00000104341.12	protein_coding	2.26e-07	0.351034	0.927	0.562	0.0130628
SFT2D1	ENSG00000198818.5	protein_coding	2.27e-07	0.653766	0.964	0.669	0.013153
TRIM28	ENSG00000130726.7	protein_coding	2.29e-07	0.776267	0.927	0.548	0.0132576
KIF3B	ENSG00000101350.6	protein_coding	2.31e-07	0.635298	0.909	0.58	0.0133723
GTF3C2	ENSG00000115207.9	protein_coding	2.32e-07	0.822159	0.818	0.448	0.0133996
MTG2	ENSG00000101181.13	protein_coding	2.35e-07	0.610012	0.636	0.286	0.0136064
MAFB	ENSG00000204103.2	protein_coding	2.41e-07	0.511519	0.691	0.359	0.0139279
ASCC3	ENSG00000112249.9	protein_coding	2.42e-07	0.571144	0.909	0.54	0.0139803
STAG3	ENSG00000066923.13	protein_coding	2.43e-07	-1.21757	0.509	0.181	0.0140689
RIN2	ENSG00000132669.8	protein_coding	2.44e-07	0.355586	1	0.7	0.0140862
LINC00938	ENSG00000273015.1	lincRNA	2.45e-07	0.961092	0.382	0.128	0.0141917
METTL9	ENSG00000197006.9	protein_coding	2.46e-07	0.723633	0.909	0.609	0.0142392
CASC7	ENSG00000259758.1	lincRNA	2.46e-07	0.784512	0.945	0.671	0.0142513
SLC35B2	ENSG00000157593.12	protein_coding	2.49e-07	1.28005	0.727	0.396	0.0144005
RPL11	ENSG00000142676.8	protein_coding	2.51e-07	-0.705802	0.982	0.974	0.0145251
LZTS3	ENSG00000088899.10	protein_coding	2.51e-07	0.8389	0.327	0.091	0.0145401
RDH14	ENSG00000240857.1	protein_coding	2.52e-07	1.1478	0.564	0.26	0.0145795
PIGT	ENSG00000124155.12	protein_coding	2.55e-07	0.701984	0.927	0.665	0.0147521
SLPI	ENSG00000124107.5	protein_coding	2.56e-07	0.400799	0.727	0.41	0.0148077
TBL2	ENSG00000106638.11	protein_coding	2.56e-07	0.90409	0.636	0.302	0.0148302
ATP1B1	ENSG00000143153.8	protein_coding	2.63e-07	0.487529	1	0.718	0.0152061
PMAIP1	ENSG00000141682.11	protein_coding	2.75e-07	-1.47923	0.273	0.633	0.0158787
HOXB3	ENSG00000120093.7	protein_coding	2.8e-07	0.587992	0.527	0.205	0.0161958
XIAP	ENSG00000101966.8	protein_coding	2.88e-07	0.339745	0.964	0.641	0.0166511
AGAP1	ENSG00000157985.13	protein_coding	2.91e-07	0.416816	0.636	0.288	0.0168138
STX3	ENSG00000166900.10	protein_coding	2.95e-07	0.554279	0.836	0.495	0.0170821
SOX12	ENSG00000177732.6	protein_coding	2.96e-07	0.981456	0.727	0.391	0.017114
SOCS6	ENSG00000170677.5	protein_coding	3.04e-07	0.529771	0.745	0.373	0.0176005
C6orf136	ENSG00000204564.7	protein_coding	3.05e-07	0.544039	0.455	0.158	0.0176233
TTC17	ENSG00000052841.10	protein_coding	3.15e-07	-2.13321	0.509	0.716	0.0182108
SEC23B	ENSG00000101310.10	protein_coding	3.18e-07	0.697318	0.945	0.631	0.0183908
MYRFL	ENSG00000166268.6	protein_coding	3.23e-07	0.340205	0.291	0.073	0.0186733
ZNF707	ENSG00000181135.11	protein_coding	3.24e-07	0.568589	0.364	0.114	0.0187327
SIX1	ENSG00000126778.7	protein_coding	3.27e-07	0.541389	0.836	0.424	0.018912
RPL21P75	ENSG00000213860.3	pseudogene	3.28e-07	-0.597351	0.8	0.947	0.0189893
ATMIN	ENSG00000166454.5	protein_coding	3.33e-07	0.839155	0.745	0.412	0.0192583
AGPAT4	ENSG00000026652.9	protein_coding	3.37e-07	0.318187	0.309	0.083	0.0194587
MIR1302-2	ENSG00000227518.2	antisense	3.43e-07	0.331786	0.582	0.266	0.0198081
TRMT5	ENSG00000126814.6	protein_coding	3.48e-07	0.884179	0.618	0.276	0.02013
MYH14	ENSG00000105357.11	protein_coding	3.52e-07	0.941692	0.509	0.197	0.0203436
SLC38A1	ENSG00000111371.11	protein_coding	3.53e-07	0.439027	1	0.876	0.0204343
TMEM39A	ENSG00000176142.8	protein_coding	3.54e-07	0.589102	0.873	0.501	0.0204968
ADD1	ENSG00000087274.12	protein_coding	3.57e-07	0.63723	0.964	0.653	0.0206293
PRPF4B	ENSG00000112739.12	protein_coding	3.61e-07	0.759897	1	0.842	0.0208474
MRGBP	ENSG00000101189.5	protein_coding	3.65e-07	0.885126	0.509	0.211	0.0211014
KIAA1919	ENSG00000173214.5	protein_coding	3.66e-07	0.993794	0.309	0.087	0.0211514
HMGCS2	ENSG00000134240.7	protein_coding	3.66e-07	-0.453636	0.382	0.116	0.0211558
CPEB2	ENSG00000137449.11	protein_coding	3.68e-07	0.890414	0.709	0.394	0.0212503
OPHN1	ENSG00000079482.11	protein_coding	3.72e-07	0.922273	0.636	0.304	0.0214973
CANX	ENSG00000127022.10	protein_coding	3.79e-07	0.650965	1	0.925	0.0219414
PFDN4	ENSG00000101132.5	protein_coding	3.81e-07	0.84717	0.873	0.635	0.0220309
AC005562.1	ENSG00000214719.7	processed_transcript	3.87e-07	0.796726	0.491	0.205	0.0223629
UVSSA	ENSG00000163945.11	protein_coding	3.87e-07	0.296015	0.545	0.223	0.0223724
WHSC1	ENSG00000109685.13	protein_coding	3.87e-07	1.04547	0.818	0.546	0.0223979
GAN	ENSG00000261609.3	protein_coding	3.88e-07	0.617154	0.891	0.582	0.0224396
CTC-575D19.1	ENSG00000233913.6	pseudogene	3.99e-07	-0.66197	0.782	0.927	0.0230534
LRP11	ENSG00000120256.5	protein_coding	4e-07	0.824532	0.727	0.345	0.023145
SUMF2	ENSG00000129103.13	protein_coding	4.04e-07	-1.37945	0.8	0.882	0.023356
ANKRD11	ENSG00000167522.10	protein_coding	4.04e-07	0.460957	0.982	0.884	0.0233867
AC007318.5	ENSG00000172974.10	pseudogene	4.07e-07	0.871434	0.782	0.609	0.0235179
CD44	ENSG00000026508.12	protein_coding	4.08e-07	-1.25722	0.945	0.919	0.0236074
PNRC1	ENSG00000146278.10	protein_coding	4.13e-07	0.600962	0.982	0.73	0.0238861
RPAIN	ENSG00000129197.10	protein_coding	4.21e-07	0.595883	0.927	0.606	0.0243258
SUCO	ENSG00000094975.9	protein_coding	4.21e-07	0.697538	0.927	0.702	0.0243525
TRAF3IP2	ENSG00000056972.14	protein_coding	4.27e-07	1.05722	0.636	0.318	0.0247055
MTUS1	ENSG00000129422.9	protein_coding	4.31e-07	0.701327	0.782	0.438	0.024937
MARCKSL1	ENSG00000175130.6	protein_coding	4.33e-07	0.678581	0.927	0.647	0.0250468
MTND4P12	ENSG00000247627.2	pseudogene	4.4e-07	0.312497	0.673	0.428	0.0254141
C2	ENSG00000166278.10	protein_coding	4.41e-07	0.32375	0.436	0.146	0.0254716
PCNA	ENSG00000132646.6	protein_coding	4.42e-07	0.397083	0.964	0.617	0.0255748
MAPK9	ENSG00000050748.13	protein_coding	4.42e-07	0.570162	0.709	0.379	0.0255795
BRWD3	ENSG00000165288.10	protein_coding	4.44e-07	0.539308	0.655	0.333	0.0256446
DCUN1D2	ENSG00000150401.10	protein_coding	4.48e-07	1.07543	0.473	0.183	0.0259104
PREB	ENSG00000138073.9	protein_coding	4.5e-07	0.663884	0.673	0.359	0.0260358
KIDINS220	ENSG00000134313.10	protein_coding	4.5e-07	0.667341	0.873	0.655	0.0260401
RALGPS2	ENSG00000116191.13	protein_coding	4.55e-07	0.459566	0.764	0.396	0.026305
WDR54	ENSG00000005448.12	protein_coding	4.56e-07	0.740929	0.564	0.245	0.0263604
ITCH	ENSG00000078747.8	protein_coding	4.65e-07	0.510905	0.982	0.734	0.0268654
MORC4	ENSG00000133131.10	protein_coding	4.67e-07	0.919975	0.673	0.331	0.0270066
ZNF767	ENSG00000133624.9	pseudogene	4.68e-07	0.582041	0.345	0.103	0.0270367
HGS	ENSG00000185359.8	protein_coding	4.68e-07	0.280436	0.691	0.323	0.0270397
TRIM16L	ENSG00000108448.16	protein_coding	4.68e-07	-0.257654	0.473	0.158	0.0270515
RNF31	ENSG00000092098.12	protein_coding	4.68e-07	0.962314	0.473	0.191	0.0270643
HOXB5	ENSG00000120075.5	protein_coding	4.74e-07	0.653248	0.291	0.077	0.0274146
AMOT	ENSG00000126016.9	protein_coding	4.76e-07	0.32818	0.473	0.191	0.027505
PHF3	ENSG00000118482.7	protein_coding	4.76e-07	0.595318	0.964	0.795	0.0275307
RASEF	ENSG00000165105.9	protein_coding	4.8e-07	0.638978	0.836	0.462	0.027726
SGSM2	ENSG00000141258.8	protein_coding	4.8e-07	0.72513	0.436	0.168	0.027733
ITPKC	ENSG00000086544.2	protein_coding	4.8e-07	1.29135	0.545	0.235	0.0277585
ZBTB24	ENSG00000112365.4	protein_coding	4.8e-07	0.290138	0.6	0.264	0.0277818
PHLPP2	ENSG00000040199.14	protein_coding	4.81e-07	0.290706	0.545	0.233	0.027811
GNB2L1	ENSG00000204628.7	protein_coding	4.84e-07	-0.702816	1	0.988	0.028006
ACTB	ENSG00000075624.9	protein_coding	4.84e-07	-0.764809	1	1	0.0280065
ITGAV	ENSG00000138448.7	protein_coding	4.87e-07	0.773535	0.836	0.497	0.0281538
NKX3-1	ENSG00000167034.9	protein_coding	4.9e-07	0.481456	0.655	0.325	0.0283459
NELFA	ENSG00000185049.8	protein_coding	5.02e-07	0.721991	0.618	0.274	0.0290058
RPL22L1	ENSG00000163584.13	protein_coding	5.03e-07	-1.34112	0.436	0.74	0.0291062
CERS6	ENSG00000172292.10	protein_coding	5.04e-07	0.618111	0.891	0.509	0.0291196
AC127904.2	ENSG00000230732.3	sense_intronic	5.09e-07	0.705006	0.364	0.114	0.0294117
RPL17	ENSG00000265681.2	protein_coding	5.12e-07	-0.655634	0.964	0.982	0.0296213
C14orf37	ENSG00000139971.11	protein_coding	5.19e-07	1.39919	0.327	0.097	0.0300266
REPS1	ENSG00000135597.14	protein_coding	5.21e-07	0.613914	0.836	0.483	0.030153
QSOX1	ENSG00000116260.12	protein_coding	5.29e-07	0.58113	0.745	0.394	0.0305723
CTD-2510F5.6	ENSG00000265303.1	protein_coding	5.39e-07	1.7352	0.309	0.089	0.0311708
FIZ1	ENSG00000179943.6	protein_coding	5.53e-07	1.01518	0.309	0.089	0.0319798
STAMBP	ENSG00000124356.11	protein_coding	5.55e-07	0.789671	0.855	0.57	0.0320859
RP5-857K21.7	ENSG00000229344.1	pseudogene	5.55e-07	0.564199	0.836	0.611	0.0320977
RP11-96D1.11	ENSG00000262160.1	antisense	5.8e-07	0.825253	0.491	0.191	0.0335554
SVIL	ENSG00000197321.10	protein_coding	5.8e-07	0.837808	0.745	0.462	0.0335576
TTLL7	ENSG00000137941.12	protein_coding	5.82e-07	0.739643	0.491	0.191	0.0336632
SLC9A3R2	ENSG00000065054.9	protein_coding	5.91e-07	0.98069	0.4	0.132	0.034151
SLC3A1	ENSG00000138079.9	protein_coding	5.94e-07	-0.283448	0.4	0.134	0.0343655
TACO1	ENSG00000136463.7	protein_coding	5.95e-07	0.632704	0.4	0.136	0.034417
EHF	ENSG00000135373.8	protein_coding	6.01e-07	0.331494	0.927	0.515	0.0347343
GOLGA6L9	ENSG00000196648.6	protein_coding	6.09e-07	0.795519	0.509	0.223	0.0352408
TSPYL1	ENSG00000189241.6	protein_coding	6.23e-07	0.700908	1	0.88	0.0360325
PRICKLE2	ENSG00000163637.7	protein_coding	6.24e-07	0.648698	0.545	0.229	0.0360549
ESF1	ENSG00000089048.10	protein_coding	6.32e-07	0.484295	0.909	0.643	0.0365541
HSPA5	ENSG00000044574.7	protein_coding	6.41e-07	0.700697	1	0.951	0.0370899
FLJ20373	ENSG00000233404.2	protein_coding	6.46e-07	0.50831	0.473	0.176	0.0373386
CDKN1B	ENSG00000111276.6	protein_coding	6.49e-07	0.70388	0.727	0.389	0.0375501
IL13RA1	ENSG00000131724.6	protein_coding	6.5e-07	0.577663	0.818	0.462	0.0375616
PITRM1	ENSG00000107959.11	protein_coding	6.67e-07	0.693022	0.764	0.483	0.03856
WDFY1	ENSG00000085449.10	protein_coding	6.76e-07	0.631749	0.764	0.448	0.0390844
PBX1	ENSG00000185630.14	protein_coding	6.79e-07	0.312155	1	0.604	0.0392381
ZSCAN18	ENSG00000121413.8	protein_coding	6.81e-07	0.638824	0.455	0.166	0.0393538
FLII	ENSG00000177731.11	protein_coding	6.84e-07	0.627443	0.8	0.462	0.0395505
POLR3F	ENSG00000132664.7	protein_coding	6.85e-07	0.920677	0.473	0.193	0.0396238
GMEB2	ENSG00000101216.6	protein_coding	6.86e-07	0.617441	0.418	0.152	0.0396399
TMEM11	ENSG00000178307.5	protein_coding	6.89e-07	0.720287	0.764	0.467	0.0398453
GID8	ENSG00000101193.6	protein_coding	7.06e-07	0.729432	0.927	0.702	0.0408093
TJAP1	ENSG00000137221.10	protein_coding	7.1e-07	0.621051	0.509	0.223	0.0410237
POLG	ENSG00000140521.7	protein_coding	7.22e-07	0.544326	0.636	0.3	0.0417569
BCL11A	ENSG00000119866.16	protein_coding	7.25e-07	-2.45962	0.055	0.402	0.0419332
RIPK2	ENSG00000104312.6	protein_coding	7.31e-07	0.493509	0.909	0.572	0.0422507
ENOPH1	ENSG00000145293.10	protein_coding	7.35e-07	0.876596	0.745	0.422	0.0425085
FBXO18	ENSG00000134452.15	protein_coding	7.36e-07	0.487541	0.691	0.345	0.0425727
SLC13A3	ENSG00000158296.9	protein_coding	7.36e-07	1.62433	0.309	0.091	0.042584
MYL9	ENSG00000101335.5	protein_coding	7.37e-07	-0.333873	0.309	0.085	0.0426276
RPL24	ENSG00000114391.8	protein_coding	7.49e-07	-0.605449	0.945	0.968	0.0433295
PTK7	ENSG00000112655.11	protein_coding	7.56e-07	0.260042	0.455	0.172	0.0437368
PPP1R14C	ENSG00000198729.4	protein_coding	7.62e-07	-0.594714	0.673	0.264	0.0440848
ACADVL	ENSG00000072778.15	protein_coding	7.63e-07	0.284129	0.818	0.46	0.0440955
PFDN5	ENSG00000123349.9	protein_coding	7.69e-07	-0.607811	0.909	0.951	0.0444845
SPATA13	ENSG00000182957.11	protein_coding	7.72e-07	0.35772	0.873	0.513	0.0446536
PCGF3	ENSG00000185619.13	protein_coding	7.75e-07	0.329576	0.745	0.41	0.0447972
LCLAT1	ENSG00000172954.9	protein_coding	7.78e-07	0.70371	0.909	0.54	0.0449986
RBM6	ENSG00000004534.10	protein_coding	7.86e-07	-1.20597	0.927	0.933	0.0454288
WIPF1	ENSG00000115935.12	protein_coding	7.87e-07	-2.62235	0.109	0.454	0.0454785
DSG2	ENSG00000046604.8	protein_coding	7.97e-07	0.290016	0.836	0.517	0.0460775
ZNF35	ENSG00000169981.6	protein_coding	7.97e-07	0.676756	0.473	0.185	0.0461105
PNPO	ENSG00000108439.5	protein_coding	8.07e-07	-2.07011	0.309	0.586	0.0466811
FTLP3	ENSG00000226608.2	pseudogene	8.17e-07	0.760926	0.909	0.702	0.0472245
SPDEF	ENSG00000124664.6	protein_coding	8.28e-07	0.596438	0.745	0.442	0.047854
SLK	ENSG00000065613.9	protein_coding	8.34e-07	0.472987	0.964	0.696	0.0482189
RP11-182L21.5	ENSG00000272489.1	sense_intronic	8.48e-07	0.741987	0.491	0.203	0.0490462
C4orf46	ENSG00000205208.4	protein_coding	8.49e-07	0.716959	0.418	0.152	0.0490918
ZNF512	ENSG00000243943.5	protein_coding	8.59e-07	0.804293	0.618	0.286	0.049684
ZNFX1	ENSG00000124201.10	protein_coding	8.72e-07	0.616249	0.964	0.68	0.0504316
NEO1	ENSG00000067141.12	protein_coding	8.77e-07	0.804473	0.509	0.233	0.0506825
AK3	ENSG00000147853.12	protein_coding	8.8e-07	0.5394	0.727	0.385	0.0509022
TIAM2	ENSG00000146426.13	protein_coding	8.95e-07	0.822127	0.527	0.221	0.0517552
YWHAG	ENSG00000170027.5	protein_coding	8.96e-07	0.545596	0.982	0.769	0.0517809
SAMD4B	ENSG00000179134.10	protein_coding	8.96e-07	0.359731	0.782	0.44	0.0518098
TIMM10	ENSG00000134809.4	protein_coding	8.98e-07	-1.55858	0.382	0.661	0.0519335
ZNF235	ENSG00000159917.10	protein_coding	8.99e-07	1.16607	0.291	0.079	0.0519794
FILIP1L	ENSG00000168386.14	protein_coding	9.16e-07	0.273699	0.545	0.235	0.0529589
EPB41L3	ENSG00000082397.11	protein_coding	9.37e-07	0.51061	0.509	0.199	0.0541651
AFTPH	ENSG00000119844.10	protein_coding	9.45e-07	0.521446	0.982	0.791	0.0546166
ATP7B	ENSG00000123191.9	protein_coding	9.6e-07	1.27096	0.309	0.095	0.0555114
ZNF542	ENSG00000240225.6	pseudogene	9.64e-07	0.65032	0.418	0.148	0.0557636
RAC2	ENSG00000128340.10	protein_coding	9.73e-07	-3.73258	0.091	0.414	0.0562854
RAB40B	ENSG00000141542.6	protein_coding	9.78e-07	0.661357	0.364	0.12	0.0565461
FAM157C	ENSG00000260528.2	processed_transcript	9.97e-07	1.23203	0.418	0.168	0.0576475
VCL	ENSG00000035403.12	protein_coding	1.03e-06	0.425613	0.982	0.69	0.0595568
FOXP1	ENSG00000114861.14	protein_coding	1.04e-06	0.440824	1	0.842	0.0599317
CRTC3	ENSG00000140577.11	protein_coding	1.04e-06	0.503066	0.582	0.294	0.0599702
TBC1D8	ENSG00000204634.8	protein_coding	1.04e-06	0.616667	0.673	0.339	0.0601724
FUCA2	ENSG00000001036.9	protein_coding	1.04e-06	1.03185	0.727	0.44	0.0603859
DHCR24	ENSG00000116133.7	protein_coding	1.06e-06	0.394576	0.945	0.629	0.0613197
SPINT1	ENSG00000166145.10	protein_coding	1.07e-06	0.460126	0.873	0.535	0.0616837
PI4KAP2	ENSG00000183506.12	pseudogene	1.07e-06	1.07579	0.618	0.28	0.0620501
LINC00635	ENSG00000241469.3	lincRNA	1.09e-06	1.96813	0.309	0.091	0.0629912
RP11-6N17.6	ENSG00000264019.1	antisense	1.1e-06	-2.22013	0.236	0.531	0.0635176
JAG1	ENSG00000101384.7	protein_coding	1.11e-06	0.649775	0.582	0.252	0.064265
RP11-498P14.3	ENSG00000242375.1	lincRNA	1.11e-06	1.08335	0.327	0.103	0.0643526
STARD3	ENSG00000131748.11	protein_coding	1.12e-06	0.491609	0.527	0.219	0.0646059
PDIA3P	ENSG00000180867.9	pseudogene	1.12e-06	0.443129	0.836	0.619	0.0647123
SH3BP4	ENSG00000130147.11	protein_coding	1.12e-06	0.35392	0.727	0.359	0.0648025
KRT8P3	ENSG00000254285.2	pseudogene	1.12e-06	0.708594	0.673	0.377	0.0648044
CCDC144B	ENSG00000154874.10	pseudogene	1.14e-06	-3.87519	0.055	0.379	0.0656834
PRKAR2A	ENSG00000114302.11	protein_coding	1.14e-06	0.523101	0.927	0.558	0.0659694
GAS2L3	ENSG00000139354.6	protein_coding	1.15e-06	0.474538	0.364	0.12	0.066373
PLEKHA5	ENSG00000052126.10	protein_coding	1.16e-06	-1.04708	0.891	0.495	0.0670789
UNC119	ENSG00000109103.7	protein_coding	1.16e-06	0.888502	0.618	0.3	0.0673413
ERN1	ENSG00000178607.11	protein_coding	1.18e-06	0.440873	0.673	0.359	0.0680221
MRPS10	ENSG00000048544.5	protein_coding	1.18e-06	0.809352	0.891	0.667	0.0683646
PDE8A	ENSG00000073417.10	protein_coding	1.18e-06	0.790218	0.582	0.28	0.0685061
TFCP2	ENSG00000135457.5	protein_coding	1.21e-06	0.629341	0.655	0.304	0.0699634
EPHA2	ENSG00000142627.9	protein_coding	1.21e-06	0.823192	0.364	0.122	0.0699956
HIST1H1D	ENSG00000124575.5	protein_coding	1.21e-06	1.69197	0.291	0.081	0.0701564
ZBED4	ENSG00000100426.6	protein_coding	1.22e-06	0.375861	0.545	0.235	0.0707513
MGAT4B	ENSG00000161013.12	protein_coding	1.24e-06	0.328787	0.545	0.211	0.0716342
BLOC1S2	ENSG00000196072.7	protein_coding	1.25e-06	-1.69115	0.436	0.698	0.072468
AC011737.2	ENSG00000204196.4	pseudogene	1.26e-06	-0.838619	0.564	0.813	0.0725851
USP45	ENSG00000123552.13	protein_coding	1.27e-06	1.29681	0.582	0.266	0.0733785
LMO4	ENSG00000143013.8	protein_coding	1.29e-06	-2.03374	0.2	0.544	0.0746624
ZNF550	ENSG00000251369.4	protein_coding	1.29e-06	0.93181	0.436	0.168	0.0747134
ALCAM	ENSG00000170017.8	protein_coding	1.3e-06	-1.42726	0.309	0.661	0.0749703
PLXNB2	ENSG00000196576.10	protein_coding	1.33e-06	0.258009	0.8	0.446	0.0767294
CNTRL	ENSG00000119397.12	protein_coding	1.33e-06	-2.72251	0.236	0.556	0.0769563
RERE	ENSG00000142599.13	protein_coding	1.35e-06	0.495673	0.891	0.596	0.0779847
UNK	ENSG00000132478.5	protein_coding	1.37e-06	0.885485	0.455	0.185	0.079019
IER5	ENSG00000162783.8	protein_coding	1.38e-06	0.92455	0.927	0.643	0.0798127
FRAT2	ENSG00000181274.5	protein_coding	1.38e-06	1.07183	0.509	0.213	0.0799407
GSTA3	ENSG00000174156.9	protein_coding	1.38e-06	0.352714	0.255	0.061	0.0800774
CCDC127	ENSG00000164366.3	protein_coding	1.41e-06	0.65147	0.6	0.282	0.0812506
RTN4IP1	ENSG00000130347.8	protein_coding	1.42e-06	0.586968	0.418	0.146	0.0820102
DEK	ENSG00000124795.10	protein_coding	1.42e-06	0.673662	0.982	0.775	0.0820604
RPL36	ENSG00000130255.8	protein_coding	1.42e-06	-0.563001	0.982	0.974	0.0822195
PFKP	ENSG00000067057.12	protein_coding	1.45e-06	0.625336	0.782	0.454	0.0835814
MORN2	ENSG00000188010.8	protein_coding	1.46e-06	0.710698	0.691	0.353	0.0841822
SLC45A4	ENSG00000022567.5	protein_coding	1.47e-06	0.298892	0.436	0.166	0.0852205
SLC5A3	ENSG00000198743.5	protein_coding	1.47e-06	0.673685	0.855	0.535	0.0852234
AC016894.1	ENSG00000234624.2	pseudogene	1.48e-06	1.44353	0.255	0.065	0.0855698
2005-03-01	ENSG00000198060.5	protein_coding	1.49e-06	0.668948	0.855	0.487	0.0862859
ZXDB	ENSG00000198455.3	protein_coding	1.51e-06	1.048	0.509	0.211	0.0873237
E2F4	ENSG00000205250.4	protein_coding	1.53e-06	0.603695	0.655	0.337	0.08831
ZNF286A	ENSG00000187607.11	protein_coding	1.54e-06	0.525466	0.745	0.383	0.0890063
RFTN2	ENSG00000162944.6	protein_coding	1.55e-06	0.636826	0.327	0.101	0.0894154
TBC1D3F	ENSG00000185128.11	protein_coding	1.56e-06	0.385132	0.564	0.237	0.0900436
XXbac-BPGBPG55C20.2	ENSG00000272316.1	lincRNA	1.56e-06	0.404282	0.436	0.181	0.0900807
MIR22HG	ENSG00000186594.8	lincRNA	1.56e-06	0.645807	0.709	0.391	0.0903164
RGS12	ENSG00000159788.14	protein_coding	1.57e-06	0.560283	0.455	0.164	0.090663
SPAG1	ENSG00000104450.8	protein_coding	1.58e-06	1.01348	0.655	0.385	0.0915806
TFAP2B	ENSG00000008196.8	protein_coding	1.62e-06	-2.38927	0	0.312	0.0934594
NEU1	ENSG00000204386.6	protein_coding	1.62e-06	0.608108	0.855	0.517	0.0935304
VPS16	ENSG00000215305.5	protein_coding	1.66e-06	0.265924	0.491	0.197	0.0960453
SERP1	ENSG00000120742.6	protein_coding	1.66e-06	0.673192	1	0.888	0.0961388
RP1-90J20.12	ENSG00000270346.1	lincRNA	1.69e-06	1.18872	0.345	0.118	0.0975138
KCTD2	ENSG00000180901.6	protein_coding	1.69e-06	1.09093	0.4	0.146	0.0977525
DAG1	ENSG00000173402.7	protein_coding	1.7e-06	0.288788	0.727	0.379	0.0980518
RNF185	ENSG00000138942.11	protein_coding	1.7e-06	0.263716	0.636	0.316	0.0984657
DERA	ENSG00000023697.8	protein_coding	1.71e-06	1.01527	0.764	0.454	0.0991182
RP11-206M11.7	ENSG00000244468.1	antisense	1.72e-06	0.28195	0.836	0.422	0.0994547
SOX11	ENSG00000176887.5	protein_coding	1.72e-06	-1.24235	0.909	0.42	0.0996827
CTB-96E2.7	ENSG00000265618.1	antisense	1.76e-06	1.25255	0.382	0.146	0.101971
DCAF16	ENSG00000163257.6	protein_coding	1.79e-06	0.39729	0.909	0.558	0.103422
ATXN7L3B	ENSG00000253719.2	protein_coding	1.81e-06	0.623461	0.964	0.706	0.104483
WDFY3	ENSG00000163625.11	protein_coding	1.81e-06	0.51433	0.691	0.396	0.10452
CTDP1	ENSG00000060069.12	protein_coding	1.85e-06	0.881078	0.364	0.126	0.107156
AC005944.2	ENSG00000267469.1	antisense	1.87e-06	0.604867	0.927	0.671	0.108407
TFB1M	ENSG00000029639.6	protein_coding	1.89e-06	0.794967	0.455	0.183	0.109028
GSK3B	ENSG00000082701.10	protein_coding	1.9e-06	0.552666	0.836	0.57	0.110037
ITFG3	ENSG00000167930.11	protein_coding	1.91e-06	0.356749	0.8	0.454	0.110266
HSP90B1	ENSG00000166598.8	protein_coding	1.92e-06	0.480013	1	0.972	0.110727
LRRC59	ENSG00000108829.9	protein_coding	1.93e-06	0.50539	0.782	0.462	0.111626
CSNK1E	ENSG00000213923.6	protein_coding	1.94e-06	0.294965	0.964	0.635	0.111981
CAPN3	ENSG00000092529.18	protein_coding	1.95e-06	1.69387	0.255	0.067	0.11272
PRKAA1	ENSG00000132356.7	protein_coding	1.95e-06	0.606991	0.782	0.491	0.112996
EXOC7	ENSG00000182473.16	protein_coding	1.96e-06	1.23446	0.764	0.428	0.113604
FZD6	ENSG00000164930.7	protein_coding	1.98e-06	0.655074	0.673	0.335	0.11462
GCH1	ENSG00000131979.14	protein_coding	1.99e-06	0.88422	0.582	0.286	0.114926
TMEM30A	ENSG00000112697.11	protein_coding	1.99e-06	0.692593	0.909	0.606	0.115088
SEC22B	ENSG00000223380.3	processed_transcript	2e-06	-0.955276	0.873	0.913	0.115521
PDE12	ENSG00000174840.8	protein_coding	2.01e-06	0.624669	0.745	0.418	0.116059
R3HDM2	ENSG00000179912.15	protein_coding	2.01e-06	-1.08931	0.764	0.866	0.116333
PHKA1	ENSG00000067177.10	protein_coding	2.02e-06	0.870189	0.473	0.203	0.117033
FAM91A1	ENSG00000176853.11	protein_coding	2.05e-06	0.426459	0.964	0.647	0.118457
MAP4K3	ENSG00000011566.10	protein_coding	2.07e-06	0.673516	0.764	0.438	0.119454
ZUFSP	ENSG00000153975.5	protein_coding	2.08e-06	0.460729	0.709	0.367	0.120041
RP11-761N21.2	ENSG00000234287.1	pseudogene	2.12e-06	-0.580895	0.873	0.949	0.122646
DSTN	ENSG00000125868.11	protein_coding	2.16e-06	0.580807	1	0.872	0.124847
TPI1	ENSG00000111669.10	protein_coding	2.17e-06	0.818493	1	0.994	0.125407
ZNF841	ENSG00000197608.7	protein_coding	2.18e-06	0.685211	0.545	0.247	0.1259
CCL4	ENSG00000129277.9	protein_coding	2.2e-06	-3.51975	0.636	0.258	0.127041
RP11-483P21.2	ENSG00000260228.1	antisense	2.22e-06	1.19113	0.382	0.14	0.128271
DST	ENSG00000151914.13	protein_coding	2.25e-06	0.483695	0.964	0.704	0.130132
RP11-91J19.4	ENSG00000272005.1	lincRNA	2.28e-06	1.03745	0.382	0.142	0.131862
KIF16B	ENSG00000089177.13	protein_coding	2.29e-06	0.536792	0.836	0.515	0.132316
MPP7	ENSG00000150054.14	protein_coding	2.36e-06	0.791447	0.6	0.268	0.136249
SLC12A1	ENSG00000074803.13	protein_coding	2.37e-06	0.707206	0.4	0.14	0.1369
CA2	ENSG00000104267.5	protein_coding	2.37e-06	-0.365801	0.691	0.308	0.137038
PTPRC	ENSG00000081237.14	protein_coding	2.37e-06	-2.34567	0.6	0.728	0.137318
SEC24B	ENSG00000138802.7	protein_coding	2.39e-06	0.468568	0.764	0.428	0.138426
PSMG4	ENSG00000180822.7	protein_coding	2.4e-06	0.899175	0.709	0.389	0.138673
GALNT10	ENSG00000164574.11	protein_coding	2.41e-06	0.295369	0.582	0.302	0.139421
ANAPC15	ENSG00000110200.4	protein_coding	2.41e-06	0.645549	0.836	0.538	0.139506
FAM217B	ENSG00000196227.6	protein_coding	2.46e-06	0.369642	0.691	0.355	0.142442
MBTD1	ENSG00000011258.11	protein_coding	2.46e-06	0.507382	0.618	0.3	0.142524
MAPK6	ENSG00000069956.7	protein_coding	2.51e-06	0.734258	0.964	0.781	0.145242
RP11-2C24.6	ENSG00000262026.1	antisense	2.53e-06	0.872436	0.255	0.071	0.146422
CD164	ENSG00000135535.10	protein_coding	2.54e-06	0.640035	1	0.919	0.146997
TRIM27	ENSG00000204713.6	protein_coding	2.56e-06	0.43971	0.891	0.525	0.148086
TBL1X	ENSG00000101849.11	protein_coding	2.57e-06	0.335188	0.855	0.489	0.148575
ELK1	ENSG00000126767.13	protein_coding	2.58e-06	0.721921	0.364	0.128	0.148913
ARL8A	ENSG00000143862.3	protein_coding	2.64e-06	0.771338	0.636	0.357	0.152581
APLF	ENSG00000169621.5	protein_coding	2.7e-06	0.937373	0.273	0.077	0.156372
RPS23P8	ENSG00000230629.2	pseudogene	2.71e-06	-0.831673	0.291	0.643	0.15651
RP11-390E23.6	ENSG00000272686.1	antisense	2.71e-06	0.79399	0.364	0.124	0.156622
CCAR2	ENSG00000158941.12	protein_coding	2.72e-06	0.539806	0.655	0.316	0.157025
TMEM185B	ENSG00000226479.3	protein_coding	2.74e-06	1.06186	0.382	0.144	0.158176
YBX3	ENSG00000060138.8	protein_coding	2.74e-06	0.319803	0.964	0.653	0.158538
CDC40	ENSG00000168438.10	protein_coding	2.74e-06	0.847385	0.927	0.582	0.158704
FSIP2	ENSG00000188738.9	protein_coding	2.75e-06	0.617261	0.4	0.156	0.158932
COX8A	ENSG00000176340.3	protein_coding	2.75e-06	-0.847016	0.873	0.872	0.159147
PHF23	ENSG00000040633.8	protein_coding	2.77e-06	0.550115	0.636	0.31	0.160107
ZNF415	ENSG00000170954.7	protein_coding	2.78e-06	0.995397	0.364	0.128	0.160906
NDUFA4	ENSG00000189043.5	protein_coding	2.81e-06	-0.768919	0.836	0.929	0.162741
TLE4	ENSG00000106829.14	protein_coding	2.84e-06	-2.31989	0.091	0.412	0.164331
IFITM2	ENSG00000185201.12	protein_coding	2.87e-06	-3.13897	0.618	0.718	0.165669
TXNIP	ENSG00000117289.7	protein_coding	2.87e-06	0.443324	0.945	0.637	0.165971
HCG25	ENSG00000232940.1	antisense	2.87e-06	0.768492	0.564	0.264	0.166173
DAPP1	ENSG00000070190.8	protein_coding	2.91e-06	0.724764	0.818	0.531	0.168083
POLDIP2	ENSG00000004142.7	protein_coding	2.91e-06	0.950874	0.782	0.525	0.168286
PPAT	ENSG00000128059.4	protein_coding	2.92e-06	0.331283	0.745	0.381	0.168892
TLCD1	ENSG00000160606.6	protein_coding	3.01e-06	0.697957	0.327	0.105	0.174219
UBQLN4	ENSG00000160803.7	protein_coding	3.1e-06	0.385889	0.709	0.351	0.179153
TUG1	ENSG00000253352.4	antisense	3.11e-06	0.62006	0.927	0.72	0.179934
ZNF133	ENSG00000125846.11	protein_coding	3.13e-06	0.250079	0.382	0.136	0.18086
UBE2H	ENSG00000186591.7	protein_coding	3.21e-06	0.484942	0.982	0.771	0.185498
CCDC90B	ENSG00000137500.5	protein_coding	3.22e-06	-1.56764	0.236	0.56	0.186331
RNF11	ENSG00000123091.4	protein_coding	3.24e-06	0.305426	0.945	0.655	0.187275
KIAA0100	ENSG00000007202.10	protein_coding	3.26e-06	0.271148	0.855	0.483	0.188372
SLC20A2	ENSG00000168575.5	protein_coding	3.33e-06	0.312534	0.709	0.377	0.192384
TBRG1	ENSG00000154144.8	protein_coding	3.34e-06	-1.6495	0.236	0.548	0.193239
ZNF496	ENSG00000162714.8	protein_coding	3.39e-06	0.746259	0.418	0.164	0.196276
ATXN1L	ENSG00000224470.3	protein_coding	3.42e-06	0.590551	0.709	0.387	0.197661
TRMT112	ENSG00000173113.2	protein_coding	3.46e-06	-0.929644	0.782	0.854	0.200258
GUSB	ENSG00000169919.12	protein_coding	3.47e-06	0.412273	0.8	0.493	0.200808
ZNF616	ENSG00000204611.2	protein_coding	3.47e-06	0.998513	0.327	0.108	0.200902
GTF2IRD1	ENSG00000006704.6	protein_coding	3.51e-06	0.50249	0.6	0.284	0.202741
STRAP	ENSG00000023734.6	protein_coding	3.53e-06	0.665892	0.964	0.884	0.20385
HIP1	ENSG00000127946.12	protein_coding	3.55e-06	0.542123	0.691	0.369	0.205421
CD99L2	ENSG00000102181.15	protein_coding	3.56e-06	0.754101	0.309	0.099	0.205921
ZNF3	ENSG00000166526.12	protein_coding	3.58e-06	0.448058	0.8	0.487	0.207077
PRKAR1A	ENSG00000108946.10	protein_coding	3.59e-06	0.519903	0.982	0.781	0.207761
ZKSCAN2	ENSG00000155592.11	protein_coding	3.59e-06	0.796423	0.327	0.105	0.207839
PHIP	ENSG00000146247.13	protein_coding	3.62e-06	0.560206	1	0.862	0.209026
SGPL1	ENSG00000166224.12	protein_coding	3.62e-06	0.533024	0.964	0.708	0.209374
KB-431C1.4	ENSG00000246263.2	antisense	3.63e-06	0.760424	0.473	0.199	0.209898
PAIP1	ENSG00000172239.9	protein_coding	3.64e-06	0.569943	0.945	0.651	0.210636
CNOT11	ENSG00000158435.3	protein_coding	3.65e-06	0.374268	0.745	0.424	0.210953
HDGF	ENSG00000143321.14	protein_coding	3.67e-06	0.464283	0.945	0.71	0.212187
RAC1	ENSG00000136238.13	protein_coding	3.7e-06	0.459333	1	0.846	0.214135
LINC00662	ENSG00000261824.2	lincRNA	3.73e-06	0.393349	0.618	0.306	0.215498
AXIN1	ENSG00000103126.10	protein_coding	3.74e-06	0.705444	0.564	0.28	0.216512
GPN1	ENSG00000198522.9	protein_coding	3.75e-06	0.765943	0.855	0.635	0.216763
VANGL2	ENSG00000162738.5	protein_coding	3.8e-06	0.39148	0.309	0.097	0.219978
PSMB8	ENSG00000204264.4	protein_coding	3.83e-06	0.640834	0.945	0.635	0.221346
MCFD2	ENSG00000180398.7	protein_coding	3.87e-06	0.483481	0.964	0.716	0.223546
AKAP7	ENSG00000118507.11	protein_coding	3.89e-06	0.936466	0.327	0.11	0.224891
CXADR	ENSG00000154639.14	protein_coding	3.95e-06	-0.603008	0.855	0.467	0.228616
SRRT	ENSG00000087087.14	protein_coding	4e-06	0.629928	0.836	0.572	0.231425
RAB3IP	ENSG00000127328.17	protein_coding	4.08e-06	0.65739	0.782	0.446	0.235799
KIAA0907	ENSG00000132680.6	protein_coding	4.1e-06	0.519308	0.8	0.489	0.237058
FUT10	ENSG00000172728.11	protein_coding	4.12e-06	0.489012	0.345	0.116	0.238075
RPS5P2	ENSG00000224598.1	pseudogene	4.14e-06	1.00317	0.4	0.152	0.239431
USP46	ENSG00000109189.8	protein_coding	4.16e-06	0.359598	0.636	0.29	0.240649
RP11-611O2.3	ENSG00000256664.1	pseudogene	4.18e-06	-3.02061	0.182	0.46	0.241452
B4GALT1	ENSG00000086062.8	protein_coding	4.21e-06	-1.06326	1	0.97	0.243597
RP11-475C16.1	ENSG00000218426.5	pseudogene	4.41e-06	-0.609283	0.782	0.876	0.254869
NDUFB8	ENSG00000166136.11	protein_coding	4.46e-06	-1.0723	0.855	0.842	0.257806
PPP2R3A	ENSG00000073711.6	protein_coding	4.5e-06	0.566979	0.691	0.373	0.260479
WWTR1	ENSG00000018408.10	protein_coding	4.54e-06	0.831953	0.927	0.759	0.262736
PCED1A	ENSG00000132635.12	protein_coding	4.58e-06	0.266631	0.455	0.172	0.264923
AFAP1	ENSG00000196526.6	protein_coding	4.6e-06	0.717986	0.491	0.225	0.265694
RPSAP58	ENSG00000205246.4	protein_coding	4.65e-06	-1.0366	0.873	0.89	0.268969
PHF1	ENSG00000112511.13	protein_coding	4.66e-06	0.562566	0.545	0.262	0.269223
BCR	ENSG00000186716.15	protein_coding	4.68e-06	0.378135	0.655	0.347	0.270549
FRMD4B	ENSG00000114541.10	protein_coding	4.69e-06	0.650547	0.709	0.436	0.27107
COMMD7	ENSG00000149600.7	protein_coding	4.69e-06	0.474763	0.873	0.538	0.271088
EIF4H	ENSG00000106682.10	protein_coding	4.69e-06	0.555592	0.945	0.803	0.271287
SLC5A3	ENSG00000272962.1	protein_coding	4.71e-06	0.616489	0.873	0.572	0.27247
ANKS1A	ENSG00000064999.12	protein_coding	4.73e-06	0.258594	0.582	0.272	0.273387
ZNF263	ENSG00000006194.6	protein_coding	4.73e-06	0.990689	0.6	0.32	0.27366
EEF1B2	ENSG00000114942.9	protein_coding	4.73e-06	-0.79556	0.891	0.933	0.273745
TXNDC5	ENSG00000239264.4	protein_coding	4.75e-06	0.584659	0.945	0.673	0.274513
NUP54	ENSG00000138750.10	protein_coding	4.77e-06	0.289178	0.818	0.497	0.275797
RIPK4	ENSG00000183421.7	protein_coding	4.78e-06	0.498907	0.4	0.148	0.276663
RP11-545I5.3	ENSG00000235652.3	antisense	4.81e-06	0.85492	0.473	0.191	0.27795
FAM111A	ENSG00000166801.11	protein_coding	4.84e-06	-2.00561	0.455	0.686	0.279672
TPI1P1	ENSG00000226415.1	pseudogene	4.86e-06	0.772116	0.945	0.803	0.280783
PLXNA2	ENSG00000076356.6	protein_coding	4.9e-06	1.08851	0.418	0.172	0.283144
MEF2C	ENSG00000081189.9	protein_coding	4.91e-06	-3.45917	0.109	0.402	0.283819
C11orf68	ENSG00000175573.6	protein_coding	5.01e-06	0.344854	0.509	0.229	0.289589
DLG3	ENSG00000082458.7	protein_coding	5.01e-06	0.775619	0.782	0.422	0.289726
ZNF652	ENSG00000198740.4	protein_coding	5.07e-06	0.659105	0.836	0.521	0.293265
TPD52L2	ENSG00000101150.13	protein_coding	5.1e-06	0.283134	0.782	0.41	0.294705
DYNLL1	ENSG00000088986.6	protein_coding	5.2e-06	-0.749625	0.945	0.945	0.300782
NOMO3	ENSG00000103226.13	protein_coding	5.24e-06	0.547582	0.8	0.596	0.302843
NFIA	ENSG00000162599.11	protein_coding	5.39e-06	0.562128	0.964	0.659	0.31151
TRAPPC9	ENSG00000167632.10	protein_coding	5.4e-06	0.348728	0.582	0.296	0.312197
MT-ND3	ENSG00000198840.2	protein_coding	5.43e-06	0.475441	1	0.994	0.313787
PCLO	ENSG00000186472.15	protein_coding	5.49e-06	1.18511	0.455	0.199	0.317708
RPTOR	ENSG00000141564.9	protein_coding	5.5e-06	0.655404	0.291	0.087	0.317729
SQSTM1	ENSG00000161011.15	protein_coding	5.51e-06	0.429704	1	0.85	0.318865
GNAS	ENSG00000087460.19	protein_coding	5.53e-06	0.400652	1	0.976	0.319829
MEST	ENSG00000106484.10	protein_coding	5.69e-06	1.18975	0.673	0.385	0.329063
PART1	ENSG00000152931.7	lincRNA	5.7e-06	0.504467	0.345	0.122	0.329326
TXNL4A	ENSG00000141759.10	protein_coding	5.74e-06	0.564148	0.764	0.471	0.331981
UBE2I	ENSG00000103275.14	protein_coding	5.76e-06	0.384128	0.891	0.586	0.332805
MED23	ENSG00000112282.13	protein_coding	5.77e-06	0.452318	0.891	0.613	0.333468
RALY	ENSG00000125970.7	protein_coding	5.8e-06	0.777651	0.873	0.578	0.335425
STYK1	ENSG00000060140.4	protein_coding	5.85e-06	0.800292	0.291	0.089	0.338037
ZNF480	ENSG00000198464.9	protein_coding	5.87e-06	1.10468	0.6	0.323	0.339365
TNFAIP3	ENSG00000118503.10	protein_coding	6.01e-06	0.520373	0.982	0.677	0.347328
CENPB	ENSG00000125817.7	protein_coding	6.01e-06	0.452425	0.491	0.215	0.347415
CD82	ENSG00000085117.7	protein_coding	6.02e-06	-2.28523	0.218	0.517	0.34812
XPO1	ENSG00000082898.12	protein_coding	6.08e-06	0.504793	1	0.775	0.351264
SGSM3	ENSG00000100359.16	protein_coding	6.09e-06	0.608958	0.455	0.181	0.352
RPL23	ENSG00000125691.8	protein_coding	6.1e-06	-2.05534	1	0.99	0.352728
RPS7P1	ENSG00000183405.5	pseudogene	6.11e-06	0.519119	0.927	0.832	0.353337
KLC4	ENSG00000137171.10	protein_coding	6.16e-06	0.542965	0.327	0.112	0.35644
DHRS3	ENSG00000162496.4	protein_coding	6.2e-06	0.326064	0.6	0.292	0.358282
PNN	ENSG00000100941.4	protein_coding	6.2e-06	0.491183	1	0.781	0.358307
SEC63	ENSG00000025796.9	protein_coding	6.21e-06	0.514291	0.982	0.781	0.359002
UBE2Z	ENSG00000159202.13	protein_coding	6.25e-06	0.702501	0.927	0.686	0.361308
ANKRD30A	ENSG00000148513.13	protein_coding	6.27e-06	-3.47006	0.018	0.308	0.362501
KLHL5	ENSG00000109790.12	protein_coding	6.42e-06	0.42347	0.618	0.339	0.370965
PDIA4	ENSG00000155660.6	protein_coding	6.42e-06	0.577539	0.982	0.846	0.371168
PIP	ENSG00000159763.3	protein_coding	6.48e-06	-6.25162	0	0.284	0.37486
RPS6KA3	ENSG00000177189.8	protein_coding	6.56e-06	0.474685	0.636	0.345	0.37951
LINC00657	ENSG00000260032.1	lincRNA	6.65e-06	0.603226	1	0.929	0.38446
SSH2	ENSG00000141298.13	protein_coding	6.71e-06	0.395606	0.836	0.552	0.388083
ZFAND3	ENSG00000156639.7	protein_coding	6.83e-06	1.10775	0.582	0.274	0.394702
AC020663.1	ENSG00000256599.1	pseudogene	6.85e-06	0.495779	0.564	0.28	0.396048
JARID2	ENSG00000008083.9	protein_coding	6.86e-06	0.639013	0.873	0.639	0.396561
PIAS3	ENSG00000131788.11	protein_coding	6.92e-06	0.543823	0.6	0.308	0.400373
APOC1	ENSG00000130208.5	protein_coding	6.94e-06	-1.08731	0.291	0.085	0.401224
DGKE	ENSG00000153933.5	protein_coding	6.99e-06	1.06406	0.473	0.211	0.403975
PIGA	ENSG00000165195.9	protein_coding	7.01e-06	0.513445	0.673	0.361	0.405423
UFL1	ENSG00000014123.9	protein_coding	7.09e-06	0.568935	0.945	0.635	0.409832
N4BP2	ENSG00000078177.9	protein_coding	7.16e-06	0.723482	0.709	0.404	0.41402
PARP3	ENSG00000041880.10	protein_coding	7.21e-06	0.553505	0.291	0.087	0.416939
RP11-22C11.2	ENSG00000261437.1	antisense	7.24e-06	0.346802	0.255	0.073	0.418747
CCDC6	ENSG00000108091.10	protein_coding	7.31e-06	0.458909	0.982	0.659	0.422499
ACOT7	ENSG00000097021.15	protein_coding	7.32e-06	0.63737	0.636	0.323	0.423177
RP11-254F7.3	ENSG00000271787.1	antisense	7.33e-06	1.47547	0.364	0.138	0.423901
RPL32	ENSG00000144713.8	protein_coding	7.38e-06	-0.517624	0.982	0.986	0.426599
RP11-1100L3.7	ENSG00000257663.1	antisense	7.43e-06	0.473723	0.673	0.337	0.429735
ATG16L1	ENSG00000085978.17	protein_coding	7.45e-06	0.309682	0.691	0.41	0.430914
C8orf33	ENSG00000182307.8	protein_coding	7.46e-06	0.40736	0.836	0.533	0.431204
ARRB1	ENSG00000137486.12	protein_coding	7.49e-06	0.512065	0.418	0.154	0.433111
TMBIM4	ENSG00000155957.12	protein_coding	7.54e-06	-0.937577	0.8	0.874	0.435868
SC22CB-1E7.1	ENSG00000232346.1	pseudogene	7.57e-06	-0.978837	0.145	0.454	0.437554
BTF3	ENSG00000145741.11	protein_coding	7.68e-06	-0.778872	0.891	0.935	0.444315
ACAT2	ENSG00000120437.7	protein_coding	7.69e-06	0.519461	0.727	0.398	0.444526
RHBDD2	ENSG00000005486.12	protein_coding	7.75e-06	0.457606	0.836	0.538	0.448321
RPLP0P6	ENSG00000213553.3	pseudogene	7.97e-06	-0.596387	0.909	0.927	0.461012
BTN3A1	ENSG00000026950.12	protein_coding	8e-06	0.905821	0.582	0.3	0.462536
NDUFB1	ENSG00000183648.5	protein_coding	8.09e-06	-0.808779	0.691	0.826	0.467855
RPLP0	ENSG00000089157.11	protein_coding	8.19e-06	-0.588646	1	0.986	0.47382
MBOAT2	ENSG00000143797.7	protein_coding	8.25e-06	0.394569	0.655	0.365	0.477249
RP11-333E13.2	ENSG00000250568.1	pseudogene	8.32e-06	0.595358	0.4	0.172	0.480803
DCP1B	ENSG00000151065.9	protein_coding	8.39e-06	0.2557	0.345	0.12	0.485362
PCF11	ENSG00000165494.6	protein_coding	8.44e-06	-1.03016	0.509	0.779	0.487798
SIPA1L2	ENSG00000116991.6	protein_coding	8.45e-06	-0.513485	0.636	0.296	0.488296
INSIG1	ENSG00000186480.8	protein_coding	8.47e-06	0.491502	0.782	0.495	0.489831
MOB3A	ENSG00000172081.9	protein_coding	8.49e-06	-2.42223	0.345	0.613	0.491012
TAB3	ENSG00000157625.11	protein_coding	8.52e-06	0.760606	0.636	0.323	0.492732
CDS1	ENSG00000163624.5	protein_coding	8.56e-06	0.539212	0.709	0.396	0.495029
HNRNPH1	ENSG00000169045.13	protein_coding	8.56e-06	-0.452124	1	0.994	0.495116
DDIT3	ENSG00000175197.6	protein_coding	8.58e-06	0.387205	0.964	0.72	0.496163
TAF11	ENSG00000064995.12	protein_coding	8.58e-06	0.532167	0.855	0.556	0.496378
CA12	ENSG00000074410.9	protein_coding	8.6e-06	-3.4822	0.164	0.438	0.497301
MUCL1	ENSG00000172551.6	protein_coding	8.73e-06	-1.72323	0.655	0.32	0.504945
ETS1	ENSG00000134954.10	protein_coding	8.87e-06	-2.18416	0.091	0.389	0.512689
C10orf32	ENSG00000166275.11	protein_coding	8.89e-06	-1.81743	0.309	0.582	0.514244
GCLC	ENSG00000001084.6	protein_coding	8.94e-06	0.559136	0.782	0.465	0.516693
LY6G5B	ENSG00000240053.8	protein_coding	8.95e-06	1.43279	0.364	0.138	0.517755
CREBBP	ENSG00000005339.8	protein_coding	9.04e-06	0.474116	1	0.746	0.522885
ZKSCAN1	ENSG00000106261.12	protein_coding	9.08e-06	0.445798	0.982	0.744	0.525222
ATG9A	ENSG00000198925.6	protein_coding	9.09e-06	0.768605	0.545	0.272	0.525731
RPL26	ENSG00000161970.8	protein_coding	9.15e-06	-0.580233	0.964	0.957	0.528917
DYNC1LI2	ENSG00000135720.8	protein_coding	9.16e-06	0.608857	0.909	0.635	0.529356
RUNX3	ENSG00000020633.14	protein_coding	9.18e-06	-1.82465	0.109	0.424	0.530559
RPSAP15	ENSG00000237506.2	pseudogene	9.2e-06	-0.741868	0.309	0.58	0.531766
F5	ENSG00000198734.6	protein_coding	9.3e-06	1.52669	0.327	0.118	0.537886
NSUN5P2	ENSG00000106133.13	pseudogene	9.3e-06	1.19609	0.709	0.424	0.537893
OSBPL10	ENSG00000144645.9	protein_coding	9.32e-06	0.335606	0.855	0.471	0.539004
HIGD1A	ENSG00000181061.9	protein_coding	9.33e-06	0.8297	0.964	0.795	0.539529
GPD2	ENSG00000115159.11	protein_coding	9.34e-06	0.882768	0.709	0.408	0.540264
RCN2	ENSG00000117906.9	protein_coding	9.36e-06	0.433207	0.818	0.487	0.540935
MAFK	ENSG00000198517.5	protein_coding	9.54e-06	0.459789	0.491	0.229	0.55148
AC022431.1	ENSG00000226221.1	pseudogene	9.68e-06	-0.811847	0.473	0.714	0.55966
CHCHD2	ENSG00000106153.12	protein_coding	9.78e-06	-0.736611	0.982	0.919	0.5657
BRIX1	ENSG00000113460.8	protein_coding	9.88e-06	0.580802	0.909	0.619	0.57115
RP11-680G24.5	ENSG00000260872.1	antisense	9.88e-06	0.700834	0.564	0.276	0.571497
PLEKHA1	ENSG00000107679.10	protein_coding	9.89e-06	0.842867	0.709	0.424	0.571963
NUDT19	ENSG00000213965.3	protein_coding	1.02e-05	-1.60741	0.6	0.761	0.588136
ABCC4	ENSG00000125257.9	protein_coding	1.02e-05	0.549694	0.6	0.296	0.589952
RPL37A	ENSG00000197756.5	protein_coding	1.04e-05	-0.539614	0.964	0.974	0.599501
LINC00969	ENSG00000242086.4	lincRNA	1.04e-05	0.48813	0.873	0.621	0.602995
RAB2A	ENSG00000104388.10	protein_coding	1.05e-05	0.455973	0.982	0.787	0.608917
TMEM8A	ENSG00000129925.6	protein_coding	1.05e-05	0.53078	0.582	0.31	0.609066
OR7E22P	ENSG00000179799.7	pseudogene	1.06e-05	0.795317	0.255	0.071	0.613391
RASSF3	ENSG00000153179.7	protein_coding	1.07e-05	-1.47179	0.673	0.783	0.618068
EXOC3	ENSG00000180104.11	protein_coding	1.07e-05	0.738174	0.673	0.365	0.618956
TCP1	ENSG00000120438.7	protein_coding	1.07e-05	0.656808	1	0.897	0.61989
YTHDF1	ENSG00000149658.13	protein_coding	1.08e-05	0.538101	0.8	0.491	0.623475
SLC26A2	ENSG00000155850.7	protein_coding	1.08e-05	0.363195	0.418	0.17	0.624566
CTD-2287O16.1	ENSG00000185641.5	pseudogene	1.09e-05	-0.670019	0.582	0.791	0.629212
PGBD1	ENSG00000137338.4	protein_coding	1.1e-05	0.850292	0.345	0.13	0.634928
RNF144A	ENSG00000151692.10	protein_coding	1.1e-05	0.31876	0.327	0.116	0.636495
NMD3	ENSG00000169251.8	protein_coding	1.1e-05	0.790217	0.945	0.682	0.637201
SEH1L	ENSG00000085415.11	protein_coding	1.11e-05	0.441409	0.836	0.497	0.642588
CRLF3	ENSG00000176390.10	protein_coding	1.11e-05	0.382929	0.764	0.469	0.64284
LPGAT1	ENSG00000123684.8	protein_coding	1.11e-05	0.578988	0.836	0.572	0.643365
LINC00511	ENSG00000227036.2	lincRNA	1.12e-05	0.561035	0.364	0.126	0.645395
MAPRE1	ENSG00000101367.8	protein_coding	1.12e-05	0.552703	0.982	0.799	0.648971
POLR3A	ENSG00000148606.8	protein_coding	1.13e-05	0.348904	0.745	0.406	0.655078
ERBB3	ENSG00000065361.10	protein_coding	1.14e-05	0.333499	0.909	0.596	0.658775
RPLP2	ENSG00000177600.4	protein_coding	1.14e-05	-0.471127	0.982	0.976	0.659389
COQ9	ENSG00000088682.9	protein_coding	1.16e-05	0.63344	0.655	0.32	0.669255
MT-CYB	ENSG00000198727.2	protein_coding	1.16e-05	0.523946	1	1	0.673223
BNIP3	ENSG00000176171.7	protein_coding	1.18e-05	0.957638	0.855	0.485	0.684983
TFF1	ENSG00000160182.2	protein_coding	1.19e-05	-2.80156	0.564	0.227	0.690629
RPL3P4	ENSG00000232573.1	pseudogene	1.2e-05	-0.592139	0.909	0.939	0.695397
FAM188A	ENSG00000148481.9	protein_coding	1.21e-05	-1.15093	0.073	0.381	0.698519
SREK1IP1	ENSG00000153006.10	protein_coding	1.22e-05	0.56465	0.855	0.594	0.70568
BLOC1S5	ENSG00000188428.12	protein_coding	1.23e-05	0.707807	0.455	0.195	0.71256
MTND1P23	ENSG00000225972.1	pseudogene	1.26e-05	0.601281	0.909	0.7	0.728838
EDN1	ENSG00000078401.6	protein_coding	1.28e-05	-0.7706	0.655	0.298	0.739178
LGALS1	ENSG00000100097.7	protein_coding	1.28e-05	-1.7975	0.491	0.7	0.739506
FYN	ENSG00000010810.13	protein_coding	1.29e-05	-0.517509	0.582	0.262	0.74429
IFT52	ENSG00000101052.8	protein_coding	1.3e-05	0.727233	0.709	0.452	0.751075
RPS17L	ENSG00000182774.6	protein_coding	1.3e-05	-0.703588	0.982	0.945	0.751303
YES1	ENSG00000176105.9	protein_coding	1.31e-05	0.872682	0.782	0.511	0.756801
C1RL	ENSG00000139178.6	protein_coding	1.32e-05	0.858557	0.491	0.245	0.762542
FAM229B	ENSG00000203778.3	protein_coding	1.32e-05	0.814823	0.364	0.134	0.763156
SMYD2	ENSG00000143499.9	protein_coding	1.33e-05	0.605526	0.582	0.288	0.771515
ESRP1	ENSG00000104413.11	protein_coding	1.35e-05	0.304048	0.927	0.6	0.781887
C6orf226	ENSG00000221821.2	protein_coding	1.36e-05	1.32035	0.327	0.118	0.785046
RDH10	ENSG00000121039.5	protein_coding	1.37e-05	0.41763	0.8	0.458	0.789322
URGCP	ENSG00000106608.12	protein_coding	1.37e-05	0.618869	0.582	0.3	0.792448
SNX12	ENSG00000147164.7	protein_coding	1.38e-05	0.476192	0.6	0.323	0.799393
RSBN1L-AS1	ENSG00000214293.4	lincRNA	1.38e-05	0.693278	0.618	0.31	0.799707
MLPH	ENSG00000115648.9	protein_coding	1.39e-05	0.701964	0.945	0.582	0.801029
NCKAP5	ENSG00000176771.11	protein_coding	1.39e-05	0.681816	0.4	0.164	0.802111
ZDHHC2	ENSG00000104219.8	protein_coding	1.39e-05	-1.74092	0.036	0.316	0.805819
PIK3C3	ENSG00000078142.7	protein_coding	1.4e-05	0.679859	0.764	0.45	0.80696
RPA2	ENSG00000117748.5	protein_coding	1.4e-05	-2.40987	0.327	0.584	0.809822
RTKN	ENSG00000114993.11	protein_coding	1.41e-05	0.451378	0.545	0.26	0.816198
NDUFA9	ENSG00000139180.6	protein_coding	1.42e-05	0.562345	0.873	0.757	0.819236
RNF103	ENSG00000239305.2	protein_coding	1.43e-05	0.497636	0.8	0.507	0.826796
DCP1A	ENSG00000162290.12	protein_coding	1.43e-05	0.403913	0.945	0.606	0.827972
PYCARD	ENSG00000103490.13	protein_coding	1.44e-05	-2.24186	0.073	0.361	0.83095
EIF1	ENSG00000173812.6	protein_coding	1.47e-05	-0.780346	0.982	0.988	0.847067
KBTBD8	ENSG00000163376.7	protein_coding	1.48e-05	-3.16206	0.018	0.296	0.85314
METTL16	ENSG00000127804.8	protein_coding	1.48e-05	0.459566	0.673	0.349	0.855513
ARPC3	ENSG00000111229.11	protein_coding	1.48e-05	-0.711562	0.945	0.951	0.856506
NPM1P37	ENSG00000219085.1	pseudogene	1.48e-05	1.57849	0.255	0.079	0.856617
YPEL3	ENSG00000090238.7	protein_coding	1.48e-05	0.516023	0.582	0.288	0.858152
AC117834.1	ENSG00000212999.1	protein_coding	1.49e-05	0.965593	0.345	0.124	0.863077
CDK3	ENSG00000250506.2	protein_coding	1.5e-05	0.267221	0.273	0.083	0.865798
ULK1	ENSG00000177169.5	protein_coding	1.5e-05	0.360262	0.655	0.339	0.867758
TPD52L1	ENSG00000111907.16	protein_coding	1.5e-05	0.280591	0.855	0.481	0.869963
PPFIBP2	ENSG00000166387.7	protein_coding	1.53e-05	0.78164	0.636	0.329	0.88222
C20orf112	ENSG00000197183.8	protein_coding	1.54e-05	0.35584	0.818	0.505	0.887554
CLSTN3	ENSG00000139182.9	protein_coding	1.54e-05	1.04997	0.4	0.16	0.892242
SNX10	ENSG00000086300.11	protein_coding	1.55e-05	-0.604238	0.182	0.475	0.894639
LMBR1	ENSG00000105983.15	protein_coding	1.55e-05	0.50607	0.691	0.387	0.897851
SNRPB2	ENSG00000125870.6	protein_coding	1.56e-05	0.561262	0.964	0.811	0.900286
TAF1A	ENSG00000143498.13	protein_coding	1.57e-05	0.727713	0.527	0.249	0.910115
MFSD4	ENSG00000174514.8	protein_coding	1.6e-05	-0.308251	0.291	0.087	0.924304
C11orf58	ENSG00000110696.5	protein_coding	1.61e-05	-0.721907	0.964	0.925	0.930753
USP10	ENSG00000103194.11	protein_coding	1.62e-05	0.331075	0.945	0.598	0.93597
PDGFA	ENSG00000197461.9	protein_coding	1.63e-05	-2.27087	0.091	0.379	0.945094
PPM1A	ENSG00000100614.13	protein_coding	1.64e-05	0.536182	1	0.748	0.945916
TMEM65	ENSG00000164983.6	protein_coding	1.64e-05	0.619672	0.273	0.087	0.948652
PMEPA1	ENSG00000124225.11	protein_coding	1.65e-05	0.379601	0.782	0.45	0.952607
RGS16	ENSG00000143333.6	protein_coding	1.66e-05	-2.30536	0.236	0.505	0.959081
STX6	ENSG00000135823.9	protein_coding	1.66e-05	0.394789	0.709	0.422	0.961483
ACTR10	ENSG00000131966.9	protein_coding	1.67e-05	0.536466	0.855	0.596	0.962819
IFT20	ENSG00000109083.9	protein_coding	1.67e-05	0.757925	0.764	0.487	0.96687
TBCD	ENSG00000141556.16	protein_coding	1.68e-05	0.333733	0.618	0.337	0.972579
AAK1	ENSG00000115977.14	protein_coding	1.68e-05	0.634513	0.709	0.426	0.972694
ZNF347	ENSG00000197937.8	protein_coding	1.69e-05	0.437589	0.455	0.199	0.975165
CXCR4	ENSG00000121966.6	protein_coding	1.72e-05	-2.40857	0.327	0.582	0.992641
CSTF1	ENSG00000101138.7	protein_coding	1.73e-05	0.629733	0.655	0.369	0.99744
ARHGAP5	ENSG00000100852.8	protein_coding	1.73e-05	0.435831	0.891	0.643	0.998671
ADAM17	ENSG00000151694.8	protein_coding	1.73e-05	0.483298	0.782	0.619	0.999474
SPOPL	ENSG00000144228.4	protein_coding	1.73e-05	0.625135	0.818	0.519	1
CBWD6	ENSG00000204790.8	protein_coding	1.74e-05	-0.898804	0.873	0.897	1
SP1	ENSG00000185591.5	protein_coding	1.74e-05	0.689141	0.855	0.596	1
NFXL1	ENSG00000170448.7	protein_coding	1.75e-05	0.562601	0.564	0.264	1
SOD2	ENSG00000112096.12	protein_coding	1.79e-05	0.352301	1	0.799	1
RP11-498D10.5	ENSG00000261337.1	antisense	1.8e-05	0.88529	0.255	0.075	1
CDK16	ENSG00000102225.11	protein_coding	1.82e-05	0.383568	0.745	0.465	1
SERHL2	ENSG00000183569.13	protein_coding	1.82e-05	-3.69183	0.018	0.288	1
USP6NL	ENSG00000148429.10	protein_coding	1.83e-05	0.423739	0.8	0.503	1
RRAGD	ENSG00000025039.10	protein_coding	1.84e-05	0.904658	0.509	0.26	1
ZBED6	ENSG00000257315.1	protein_coding	1.85e-05	0.391844	0.673	0.347	1
PEX7	ENSG00000112357.8	protein_coding	1.85e-05	0.649897	0.436	0.189	1
H3F3C	ENSG00000188375.3	protein_coding	1.85e-05	0.272452	0.691	0.448	1
RPGRIP1L	ENSG00000103494.8	protein_coding	1.86e-05	0.443609	0.473	0.195	1
DDX42	ENSG00000198231.8	protein_coding	1.86e-05	0.410532	0.891	0.629	1
COX7A2L	ENSG00000115944.10	protein_coding	1.86e-05	0.861971	0.927	0.807	1
PPP1R9A	ENSG00000158528.7	protein_coding	1.88e-05	0.658646	0.673	0.383	1
BRCC3	ENSG00000185515.10	protein_coding	1.88e-05	0.649645	0.855	0.544	1
ZMYM6NB	ENSG00000243749.1	protein_coding	1.89e-05	-2.54682	0.236	0.483	1
IGJ	ENSG00000132465.6	protein_coding	1.89e-05	-3.3849	0.164	0.444	1
PPIP5K2	ENSG00000145725.15	protein_coding	1.9e-05	-1.31273	0.382	0.688	1
NFKBIE	ENSG00000146232.10	protein_coding	1.91e-05	0.560886	0.564	0.274	1
PIGS	ENSG00000087111.16	protein_coding	1.92e-05	0.422143	0.691	0.389	1
TES	ENSG00000135269.13	protein_coding	1.93e-05	0.427186	0.982	0.779	1
TMED9	ENSG00000184840.7	protein_coding	1.94e-05	0.43105	0.8	0.497	1
ENPP1	ENSG00000197594.7	protein_coding	1.98e-05	-0.458547	0.764	0.365	1
CSRP1	ENSG00000159176.9	protein_coding	1.99e-05	0.372398	0.945	0.677	1
MAT2B	ENSG00000038274.12	protein_coding	1.99e-05	0.447493	0.855	0.525	1
S100A13	ENSG00000189171.9	protein_coding	2.01e-05	0.422838	0.8	0.513	1
PSENEN	ENSG00000205155.3	protein_coding	2.03e-05	-1.42857	0.618	0.742	1
IGHG1	ENSG00000211896.2	IG_C_gene	2.04e-05	-5.24059	0.164	0.483	1
ELOVL7	ENSG00000164181.9	protein_coding	2.04e-05	0.636854	0.291	0.093	1
PLXNB1	ENSG00000164050.8	protein_coding	2.05e-05	1.05893	0.6	0.325	1
FAM198B	ENSG00000164125.11	protein_coding	2.05e-05	-0.636208	0.491	0.225	1
BCL9	ENSG00000116128.5	protein_coding	2.08e-05	0.71775	0.636	0.335	1
BAIAP2L1	ENSG00000006453.9	protein_coding	2.08e-05	0.376118	0.636	0.349	1
KCTD1	ENSG00000134504.8	protein_coding	2.09e-05	0.585007	0.6	0.304	1
MIB1	ENSG00000101752.7	protein_coding	2.1e-05	0.483209	0.8	0.458	1
NPIPB6	ENSG00000198156.6	protein_coding	2.11e-05	1.36729	0.291	0.108	1
SMAD3	ENSG00000166949.11	protein_coding	2.11e-05	0.365289	0.636	0.347	1
RPL36AL	ENSG00000165502.6	protein_coding	2.14e-05	-0.607117	0.909	0.947	1
RP11-742N3.1	ENSG00000227097.4	pseudogene	2.16e-05	-0.80332	0.909	0.919	1
KPNA3	ENSG00000102753.5	protein_coding	2.18e-05	1.04048	0.836	0.554	1
CSNK2A3	ENSG00000254598.2	protein_coding	2.19e-05	0.754982	0.582	0.331	1
TBC1D20	ENSG00000125875.9	protein_coding	2.2e-05	0.6849	0.673	0.367	1
ZNF134	ENSG00000213762.6	protein_coding	2.21e-05	1.18749	0.364	0.148	1
RP4-706A16.3	ENSG00000226084.4	pseudogene	2.21e-05	-0.620516	0.891	0.901	1
RPS15	ENSG00000115268.5	protein_coding	2.22e-05	-0.521096	0.982	0.966	1
FAM126A	ENSG00000122591.7	protein_coding	2.23e-05	-2.4059	0	0.258	1
RARG	ENSG00000172819.12	protein_coding	2.23e-05	1.15183	0.364	0.142	1
CDC14A	ENSG00000079335.13	protein_coding	2.23e-05	0.611242	0.418	0.178	1
ALG8	ENSG00000159063.8	protein_coding	2.24e-05	-2.03127	0.218	0.519	1
RP11-288H12.3	ENSG00000213073.4	pseudogene	2.26e-05	0.446759	0.382	0.144	1
CD69	ENSG00000110848.4	protein_coding	2.29e-05	-3.48967	0.364	0.562	1
CARD8	ENSG00000105483.12	protein_coding	2.29e-05	-1.79574	0.2	0.513	1
RAB34	ENSG00000109113.13	protein_coding	2.3e-05	0.551469	0.455	0.193	1
GNL1	ENSG00000204590.8	protein_coding	2.31e-05	-0.565038	0.6	0.296	1
MSH6	ENSG00000116062.10	protein_coding	2.33e-05	0.391808	0.927	0.704	1
C10orf118	ENSG00000165813.12	protein_coding	2.36e-05	0.592386	0.945	0.704	1
TMEM199	ENSG00000244045.6	protein_coding	2.36e-05	0.643536	0.6	0.316	1
HSPA7	ENSG00000225217.1	pseudogene	2.38e-05	-0.762334	0.255	0.079	1
EMC8	ENSG00000131148.4	protein_coding	2.41e-05	0.371272	0.655	0.355	1
GLO1	ENSG00000124767.6	protein_coding	2.43e-05	0.637013	0.945	0.767	1
SESN2	ENSG00000130766.4	protein_coding	2.5e-05	0.655726	0.527	0.254	1
ARHGAP17	ENSG00000140750.12	protein_coding	2.5e-05	0.538062	0.855	0.574	1
AC018737.1	ENSG00000236859.2	antisense	2.52e-05	0.969609	0.291	0.099	1
RPS16	ENSG00000105193.4	protein_coding	2.54e-05	-0.547799	0.982	0.972	1
RAPGEF5	ENSG00000136237.14	protein_coding	2.56e-05	0.794834	0.564	0.292	1
TMEM97	ENSG00000109084.9	protein_coding	2.58e-05	0.404872	0.745	0.414	1
CTD-2636A23.2	ENSG00000261604.1	antisense	2.6e-05	0.39958	0.891	0.635	1
METTL23	ENSG00000181038.9	protein_coding	2.6e-05	0.569595	0.545	0.286	1
SRI	ENSG00000075142.9	protein_coding	2.64e-05	-1.63892	0.527	0.722	1
PIK3R2	ENSG00000105647.10	protein_coding	2.67e-05	0.749316	0.564	0.274	1
CD79B	ENSG00000007312.8	protein_coding	2.68e-05	-4.24185	0	0.254	1
RASAL2	ENSG00000075391.12	protein_coding	2.7e-05	0.594917	0.564	0.28	1
TIMM22	ENSG00000177370.4	protein_coding	2.73e-05	0.446003	0.691	0.4	1
FUT2	ENSG00000176920.10	protein_coding	2.73e-05	0.449435	0.291	0.097	1
TGIF2	ENSG00000118707.5	protein_coding	2.73e-05	0.526558	0.8	0.519	1
HYOU1	ENSG00000149428.14	protein_coding	2.76e-05	0.638269	0.727	0.469	1
MSMO1	ENSG00000052802.8	protein_coding	2.78e-05	0.554104	0.836	0.568	1
DPYSL2	ENSG00000092964.12	protein_coding	2.8e-05	0.2774	0.909	0.617	1
ZNF324	ENSG00000083812.7	protein_coding	2.81e-05	-0.278628	0.309	0.108	1
ZNF267	ENSG00000185947.10	protein_coding	2.82e-05	0.581407	0.818	0.479	1
MAML1	ENSG00000161021.7	protein_coding	2.86e-05	0.480991	0.564	0.286	1
MTMR4	ENSG00000108389.5	protein_coding	2.86e-05	0.347204	0.691	0.369	1
PQLC1	ENSG00000122490.14	protein_coding	2.88e-05	0.624174	0.4	0.166	1
PCBP1	ENSG00000169564.5	protein_coding	2.9e-05	0.534557	0.982	0.897	1
P4HB	ENSG00000185624.10	protein_coding	2.94e-05	0.616171	0.927	0.767	1
ZNRD1	ENSG00000066379.10	protein_coding	2.94e-05	0.38396	0.709	0.404	1
CTB-63M22.1	ENSG00000229119.3	pseudogene	2.98e-05	-0.69014	0.764	0.874	1
HM13	ENSG00000101294.12	protein_coding	3e-05	0.402171	0.873	0.596	1
CCT6P3	ENSG00000234585.2	pseudogene	3e-05	0.618278	0.727	0.436	1
THBS1	ENSG00000137801.9	protein_coding	3.04e-05	-0.91795	0.891	0.501	1
SAMD8	ENSG00000156671.8	protein_coding	3.1e-05	0.531013	0.891	0.598	1
MESDC1	ENSG00000140406.2	protein_coding	3.13e-05	0.395996	0.709	0.389	1
CHD4	ENSG00000111642.10	protein_coding	3.14e-05	0.306922	0.964	0.86	1
OSTC	ENSG00000198856.8	protein_coding	3.15e-05	0.570141	0.945	0.832	1
RELA	ENSG00000173039.14	protein_coding	3.16e-05	0.782707	0.727	0.475	1
MAPT	ENSG00000186868.11	protein_coding	3.2e-05	-1.19897	0.018	0.284	1
TCF7L2	ENSG00000148737.11	protein_coding	3.2e-05	0.512224	0.782	0.485	1
PKP2	ENSG00000057294.9	protein_coding	3.21e-05	0.57287	0.455	0.199	1
WDR1	ENSG00000071127.12	protein_coding	3.24e-05	0.300013	1	0.773	1
ZNF16	ENSG00000170631.10	protein_coding	3.31e-05	0.998005	0.4	0.166	1
RPL14	ENSG00000188846.9	protein_coding	3.33e-05	-0.570345	0.982	0.984	1
PRDX1	ENSG00000117450.9	protein_coding	3.34e-05	-0.630026	0.982	0.951	1
ANKRD50	ENSG00000151458.7	protein_coding	3.35e-05	0.287114	0.6	0.333	1
SOX9	ENSG00000125398.5	protein_coding	3.37e-05	0.306871	0.927	0.631	1
TM2D2	ENSG00000169490.12	protein_coding	3.4e-05	0.289809	0.727	0.43	1
TBC1D9B	ENSG00000197226.8	protein_coding	3.41e-05	0.615322	0.855	0.584	1
CCDC162P	ENSG00000203799.6	pseudogene	3.46e-05	0.660152	0.255	0.079	1
LDHB	ENSG00000111716.8	protein_coding	3.48e-05	0.362582	0.964	0.69	1
NIT2	ENSG00000114021.7	protein_coding	3.51e-05	-1.53625	0.473	0.68	1
SENP6	ENSG00000112701.13	protein_coding	3.52e-05	0.467141	0.964	0.759	1
TSC22D3	ENSG00000157514.12	protein_coding	3.55e-05	-2.03395	0.655	0.757	1
MED21	ENSG00000152944.4	protein_coding	3.57e-05	0.474896	0.673	0.377	1
DNASE1	ENSG00000213918.6	protein_coding	3.59e-05	1.43	0.527	0.288	1
DDX27	ENSG00000124228.10	protein_coding	3.59e-05	0.388047	0.964	0.815	1
RP11-342K6.1	ENSG00000270696.1	antisense	3.61e-05	0.64806	0.309	0.112	1
IFT81	ENSG00000122970.11	protein_coding	3.68e-05	0.740795	0.545	0.254	1
ABL2	ENSG00000143322.15	protein_coding	3.7e-05	-0.551518	0.818	0.473	1
RMND1	ENSG00000155906.12	protein_coding	3.7e-05	0.465465	0.545	0.27	1
CRK	ENSG00000167193.7	protein_coding	3.73e-05	0.413184	0.909	0.645	1
PNMA1	ENSG00000176903.3	protein_coding	3.74e-05	1.01838	0.382	0.162	1
GSE1	ENSG00000131149.13	protein_coding	3.82e-05	0.39677	0.927	0.631	1
LINC00094	ENSG00000235106.4	antisense	3.85e-05	0.331702	0.418	0.174	1
PGGT1B	ENSG00000164219.5	protein_coding	3.95e-05	-0.77346	0.364	0.629	1
DPP7	ENSG00000176978.9	protein_coding	3.99e-05	-2.34941	0.036	0.292	1
CRIM1	ENSG00000150938.5	protein_coding	4e-05	0.334829	0.8	0.489	1
RP13-1032I1.7	ENSG00000262049.1	antisense	4.01e-05	0.376491	0.655	0.385	1
ATP6V1F	ENSG00000128524.4	protein_coding	4.09e-05	-0.83672	0.782	0.838	1
CNDP2	ENSG00000133313.10	protein_coding	4.1e-05	0.423204	0.873	0.692	1
GCSH	ENSG00000140905.5	protein_coding	4.11e-05	0.754669	0.564	0.304	1
SEPHS2	ENSG00000179918.15	protein_coding	4.18e-05	0.552583	0.927	0.714	1
TMEM179B	ENSG00000185475.4	protein_coding	4.21e-05	-1.15267	0.455	0.673	1
PHB2	ENSG00000215021.4	protein_coding	4.22e-05	0.495474	0.855	0.643	1
PHF8	ENSG00000172943.14	protein_coding	4.22e-05	0.724187	0.691	0.42	1
CCNYL1	ENSG00000163249.5	protein_coding	4.23e-05	0.254895	0.636	0.355	1
TPD52	ENSG00000076554.11	protein_coding	4.25e-05	0.378297	1	0.791	1
CRIP2	ENSG00000182809.6	protein_coding	4.26e-05	0.299816	0.909	0.572	1
CCL2	ENSG00000108691.5	protein_coding	4.28e-05	-2.12591	0.327	0.112	1
PPRC1	ENSG00000148840.6	protein_coding	4.3e-05	0.281706	0.764	0.46	1
IQCK	ENSG00000174628.12	protein_coding	4.32e-05	0.704744	0.655	0.363	1
RBPJ	ENSG00000168214.16	protein_coding	4.34e-05	0.586853	0.909	0.763	1
ARID3B	ENSG00000179361.13	protein_coding	4.37e-05	0.636153	0.527	0.272	1
RPL3P2	ENSG00000227939.1	pseudogene	4.39e-05	-0.444941	0.327	0.619	1
GINM1	ENSG00000055211.8	protein_coding	4.43e-05	0.45393	0.836	0.527	1
YWHAB	ENSG00000166913.8	protein_coding	4.44e-05	0.340419	1	0.966	1
DIMT1	ENSG00000086189.5	protein_coding	4.45e-05	0.406566	0.8	0.479	1
ZNF250	ENSG00000196150.9	protein_coding	4.48e-05	-0.352608	0.545	0.264	1
DYRK4	ENSG00000010219.9	protein_coding	4.52e-05	0.477004	0.618	0.327	1
TIMM9	ENSG00000100575.9	protein_coding	4.54e-05	0.549205	0.618	0.335	1
CTD-2302E22.3	ENSG00000258645.2	pseudogene	4.6e-05	0.559275	0.673	0.428	1
ACOX1	ENSG00000161533.7	protein_coding	4.6e-05	0.59864	0.745	0.475	1
NRSN2	ENSG00000125841.8	protein_coding	4.69e-05	0.852778	0.491	0.245	1
DPM1	ENSG00000000419.8	protein_coding	4.7e-05	0.575995	0.855	0.671	1
PTAFR	ENSG00000169403.7	protein_coding	4.71e-05	0.386923	0.4	0.174	1
C16orf54	ENSG00000185905.3	protein_coding	4.72e-05	-3.09123	0.109	0.367	1
PDPK1	ENSG00000140992.14	protein_coding	4.73e-05	0.254983	0.927	0.611	1
STAP1	ENSG00000035720.3	protein_coding	4.75e-05	-3.73879	0.018	0.264	1
NBAS	ENSG00000151779.8	protein_coding	4.76e-05	0.299798	0.764	0.495	1
CMAS	ENSG00000111726.8	protein_coding	4.77e-05	0.353662	0.709	0.418	1
RPL10	ENSG00000147403.12	protein_coding	4.79e-05	-0.496145	0.982	0.994	1
CCSER2	ENSG00000107771.11	protein_coding	4.88e-05	0.251052	0.818	0.521	1
CSTB	ENSG00000160213.5	protein_coding	4.89e-05	0.397844	1	0.791	1
DHTKD1	ENSG00000181192.7	protein_coding	4.96e-05	-0.282105	0.836	0.519	1
ZNF304	ENSG00000131845.10	protein_coding	4.98e-05	0.633654	0.382	0.176	1
DCUN1D4	ENSG00000109184.10	protein_coding	5e-05	0.721936	0.745	0.473	1
PACS1	ENSG00000175115.7	protein_coding	5.06e-05	0.910969	0.6	0.347	1
ZNF292	ENSG00000188994.8	protein_coding	5.1e-05	0.532443	0.982	0.86	1
ST8SIA6-AS1	ENSG00000204832.5	antisense	5.18e-05	0.604548	0.564	0.284	1
TOPORS-AS1	ENSG00000235453.3	antisense	5.2e-05	-1.70369	0.091	0.359	1
POLN	ENSG00000130997.12	protein_coding	5.21e-05	1.24544	0.255	0.081	1
NOL10	ENSG00000115761.11	protein_coding	5.24e-05	0.423534	0.782	0.525	1
AC004166.6	ENSG00000184616.7	pseudogene	5.28e-05	0.628056	0.273	0.097	1
SH3YL1	ENSG00000035115.17	protein_coding	5.28e-05	0.684488	0.764	0.489	1
THRAP3	ENSG00000054118.9	protein_coding	5.31e-05	-0.599333	0.982	0.97	1
LDOC1	ENSG00000182195.6	protein_coding	5.31e-05	0.750655	0.527	0.276	1
GOLPH3	ENSG00000113384.9	protein_coding	5.35e-05	0.401117	0.945	0.604	1
MGP	ENSG00000111341.5	protein_coding	5.36e-05	-4.10366	0.527	0.761	1
NR2F6	ENSG00000160113.5	protein_coding	5.38e-05	0.777662	0.727	0.414	1
MT-CO3	ENSG00000198938.2	protein_coding	5.4e-05	0.401364	1	1	1
SOD1	ENSG00000142168.10	protein_coding	5.42e-05	-0.690571	0.927	0.939	1
ZC3HAV1	ENSG00000105939.8	protein_coding	5.42e-05	-1.09928	0.909	0.907	1
PTPN3	ENSG00000070159.9	protein_coding	5.43e-05	0.983082	0.618	0.341	1
CD52	ENSG00000169442.4	protein_coding	5.44e-05	-1.78147	0.273	0.531	1
MFN2	ENSG00000116688.12	protein_coding	5.45e-05	0.259877	0.655	0.387	1
CHORDC1	ENSG00000110172.7	protein_coding	5.48e-05	-1.4463	0.709	0.793	1
DDX39B	ENSG00000198563.9	protein_coding	5.52e-05	0.321226	0.945	0.781	1
EPC2	ENSG00000135999.7	protein_coding	5.58e-05	-0.326328	0.527	0.252	1
SPINT2	ENSG00000167642.8	protein_coding	5.59e-05	0.379085	0.964	0.771	1
HSPH1	ENSG00000120694.15	protein_coding	5.59e-05	0.489588	1	0.923	1
KDSR	ENSG00000119537.11	protein_coding	5.62e-05	0.622434	0.745	0.473	1
TOP3B	ENSG00000100038.15	protein_coding	5.67e-05	-0.259162	0.291	0.099	1
PCYOX1	ENSG00000116005.7	protein_coding	5.69e-05	0.578625	0.873	0.568	1
RP11-488L18.10	ENSG00000259865.1	lincRNA	5.75e-05	-2.16384	0.436	0.602	1
EHD3	ENSG00000013016.10	protein_coding	5.75e-05	0.800319	0.291	0.11	1
RNASEH1	ENSG00000171865.5	protein_coding	5.76e-05	0.753845	0.709	0.442	1
GAPDH	ENSG00000111640.10	protein_coding	5.76e-05	0.577181	1	0.992	1
DDX18	ENSG00000088205.8	protein_coding	5.77e-05	0.447569	0.982	0.852	1
SLC35B1	ENSG00000121073.9	protein_coding	5.78e-05	0.434788	0.836	0.596	1
CDC42EP4	ENSG00000179604.8	protein_coding	5.8e-05	0.416796	0.545	0.26	1
MRPL19	ENSG00000115364.9	protein_coding	5.8e-05	0.649594	0.836	0.619	1
ZHX1	ENSG00000165156.10	protein_coding	5.84e-05	0.615649	0.764	0.489	1
PTCH1	ENSG00000185920.11	protein_coding	5.89e-05	0.267874	0.255	0.083	1
LASP1	ENSG00000002834.13	protein_coding	5.91e-05	0.616799	0.782	0.521	1
ARID4A	ENSG00000032219.14	protein_coding	5.91e-05	0.461876	0.909	0.724	1
GMDS	ENSG00000112699.6	protein_coding	5.99e-05	0.400824	0.473	0.217	1
HINT3	ENSG00000111911.5	protein_coding	6e-05	0.593154	0.636	0.355	1
VPS13D	ENSG00000048707.9	protein_coding	6.01e-05	0.453217	0.818	0.475	1
SLC2A4RG	ENSG00000125520.9	protein_coding	6.03e-05	0.634942	0.473	0.219	1
FASTKD5	ENSG00000215251.3	protein_coding	6.05e-05	0.33544	0.582	0.286	1
PAPD5	ENSG00000121274.8	protein_coding	6.1e-05	0.362618	0.891	0.582	1
LNX2	ENSG00000139517.6	protein_coding	6.1e-05	0.275794	0.473	0.219	1
TMEM248	ENSG00000106609.12	protein_coding	6.13e-05	0.430337	0.891	0.596	1
ELAVL1	ENSG00000066044.9	protein_coding	6.17e-05	0.376772	0.782	0.493	1
CBX6	ENSG00000183741.7	protein_coding	6.19e-05	-1.49476	0.364	0.586	1
AL358113.1	ENSG00000269295.1	protein_coding	6.2e-05	1.15033	0.345	0.146	1
RP11-69L16.5	ENSG00000220472.1	pseudogene	6.21e-05	-0.469209	0.255	0.574	1
RPL29P11	ENSG00000224858.4	pseudogene	6.24e-05	-1.7879	0.382	0.655	1
VASN	ENSG00000168140.4	protein_coding	6.26e-05	0.399667	0.364	0.154	1
LUC7L	ENSG00000007392.12	protein_coding	6.26e-05	0.53988	0.836	0.58	1
VAMP3	ENSG00000049245.8	protein_coding	6.31e-05	0.304977	0.709	0.385	1
AF001548.5	ENSG00000263335.1	antisense	6.35e-05	0.464568	0.436	0.187	1
C1orf51	ENSG00000159208.11	protein_coding	6.37e-05	0.998721	0.327	0.126	1
CABLES2	ENSG00000149679.7	protein_coding	6.39e-05	0.302944	0.382	0.16	1
SLC29A2	ENSG00000174669.7	protein_coding	6.39e-05	0.814326	0.309	0.116	1
C4orf3	ENSG00000164096.10	protein_coding	6.44e-05	0.689412	0.964	0.832	1
MRPL36	ENSG00000171421.8	protein_coding	6.45e-05	0.583903	0.836	0.609	1
FADS1	ENSG00000149485.12	protein_coding	6.45e-05	0.550766	0.473	0.221	1
GNPNAT1	ENSG00000100522.4	protein_coding	6.48e-05	0.474144	0.745	0.442	1
OAZ1	ENSG00000104904.8	protein_coding	6.51e-05	-0.625923	0.945	0.941	1
USP31	ENSG00000103404.10	protein_coding	6.51e-05	0.270433	0.618	0.331	1
ABRACL	ENSG00000146386.7	protein_coding	6.53e-05	0.283184	0.964	0.773	1
RP11-20B24.4	ENSG00000266642.1	antisense	6.62e-05	0.725843	0.255	0.083	1
ZNF500	ENSG00000103199.9	protein_coding	6.73e-05	-0.325783	0.364	0.146	1
MAPK3	ENSG00000102882.7	protein_coding	6.78e-05	0.601839	0.509	0.26	1
DAB2	ENSG00000153071.10	protein_coding	6.8e-05	-0.451827	0.436	0.178	1
FCGR3A	ENSG00000203747.5	protein_coding	6.83e-05	-2.4869	0.255	0.079	1
LRMP	ENSG00000118308.10	protein_coding	6.88e-05	-3.95587	0.145	0.398	1
FAM221A	ENSG00000188732.6	protein_coding	7e-05	-2.11361	0.055	0.312	1
GTF3C4	ENSG00000125484.7	protein_coding	7.05e-05	0.644501	0.709	0.406	1
CAT	ENSG00000121691.4	protein_coding	7.09e-05	0.409115	0.818	0.515	1
HOXB7	ENSG00000260027.3	protein_coding	7.13e-05	0.781449	0.455	0.203	1
CTSV	ENSG00000136943.6	protein_coding	7.14e-05	-0.474735	0.364	0.14	1
CYTIP	ENSG00000115165.5	protein_coding	7.18e-05	-2.35763	0.218	0.479	1
MUT	ENSG00000146085.7	protein_coding	7.2e-05	0.768991	0.655	0.387	1
UBN1	ENSG00000118900.10	protein_coding	7.21e-05	0.463501	0.8	0.521	1
MIDN	ENSG00000167470.8	protein_coding	7.23e-05	0.369977	0.927	0.724	1
AKIRIN2	ENSG00000135334.8	protein_coding	7.27e-05	0.538805	0.782	0.489	1
SESTD1	ENSG00000187231.9	protein_coding	7.29e-05	-0.250477	0.782	0.444	1
CLOCK	ENSG00000134852.10	protein_coding	7.39e-05	0.56514	0.818	0.56	1
SLC18A2	ENSG00000165646.7	protein_coding	7.41e-05	0.300198	0.436	0.191	1
ARHGEF6	ENSG00000129675.11	protein_coding	7.43e-05	-1.48337	0.109	0.367	1
TMED4	ENSG00000158604.10	protein_coding	7.46e-05	-0.970815	0.873	0.923	1
L3MBTL3	ENSG00000198945.3	protein_coding	7.61e-05	0.326452	0.509	0.252	1
CLTC	ENSG00000141367.7	protein_coding	7.62e-05	0.395871	1	0.876	1
CAMK2G	ENSG00000148660.16	protein_coding	7.68e-05	0.525889	0.655	0.398	1
RP11-294J22.6	ENSG00000262967.1	antisense	7.73e-05	-1.12687	0.636	0.734	1
NAPG	ENSG00000134265.8	protein_coding	7.74e-05	0.337592	0.891	0.572	1
ST7	ENSG00000004866.14	protein_coding	7.77e-05	0.368643	0.6	0.32	1
PREP	ENSG00000085377.9	protein_coding	7.78e-05	0.331321	0.509	0.268	1
TMEM63B	ENSG00000137216.14	protein_coding	7.84e-05	0.352365	0.436	0.209	1
THADA	ENSG00000115970.14	protein_coding	7.84e-05	0.327144	0.709	0.428	1
PBX3	ENSG00000167081.12	protein_coding	7.85e-05	-2.08889	0.055	0.306	1
LPXN	ENSG00000110031.8	protein_coding	7.88e-05	-2.2861	0.236	0.499	1
HIVEP1	ENSG00000095951.12	protein_coding	7.9e-05	-0.282179	0.818	0.54	1
KDM3B	ENSG00000120733.9	protein_coding	7.95e-05	0.380955	0.764	0.477	1
[truncated: 5,021 more rows]
