# Supplementary material for: SCIRT lncRNA Restrains Tumorigenesis by Opposing Transcriptional Programs of Tumor-Initiating Cells
Source: Oxford University Press journal article supplement (doi:10.1158/0008-5472.can-20-2612), 2020-11-10
Supplement: 00085472can202612-sup-248586_2_supp_6687200_qryknr.xlsx [file 00085472can202612-sup-248586_2_supp_6687200_qryknr.xlsx]

## Sheet: top 100 genes up
SCG2
NEGR1
SLC14A1
C7
CHRDL1
XKRX
STEAP3
AQP5
NR4A3
NUDT15
CHPF
TOP1MT
EDIL3
EMP2
TLN1
IL10RB
SCAMP1
C4B
CSGALNACT1
FER1L4
SYT12
MAPK3
BMF
ALCAM
HIPK3
LGR6
LGALS3
SAR1B
THG1L
LBH
ERMP1
MUC1
SNED1
IL6ST
MUC5AC
XPR1
CERCAM
SLC29A4
SYS1
LINC00886
LSM14A
TK2
NGFR
ID3
ANGPT1
SPEG
IQSEC1
PPP1R14B
F2R
CYP2E1
HS1BP3
RNF182
IZUMO4
COL7A1
EFNB3
VIPR1
SOX2
SLC41A1
HIP1
RAPGEF4
DOK6
C4ORF47
GDF11
CPNE2
UCK1
RORB
CLIC3
CCL26
SLC22A4
TRIM47
RBM38
SEMA6D
CITED1
ATP11C
TNFRSF1B
REEP2
YWHAH
BDNF
GGT1
CYB5R4
ERBB3
SHANK3
SLC45A4
LYPD1
KCNN4
ZDHHC20
COL5A1
RCOR2
SEMA4F
GFAP
CADM4
MRPS6
GPR173
SERPINE2
MATN2
PWWP2B
SCN1B
HAS3
MAP3K15
ANO10
