# Supplementary material for: SCIRT lncRNA Restrains Tumorigenesis by Opposing Transcriptional Programs of Tumor-Initiating Cells
Source: Oxford University Press journal article supplement (doi:10.1158/0008-5472.can-20-2612), 2020-11-10
Supplement: 00085472can202612-sup-248586_2_supp_6687201_qlyknl.xlsx [file 00085472can202612-sup-248586_2_supp_6687201_qlyknl.xlsx]

## Sheet: Sequence of siRNAs
Target Name	siRNA sequence
RP5-1120P11.1 (siSCIRT#1)	GUUUGUAGAUGUAAUCAAA
RP5-1120P11.1 (siSCIRT#2)	CACUGUUGUUGGUUGAAUU
GS1-600G8.5	CAAUGUAACUGUCAAGGUU
SYNPR-AS1	GCUGUAUAACAGUCGCUCA
RP11-54A9.1	AGACACUUUGGAUAACUCU
LINC00704	UCACCACAAUUGCAAUCAA
APCDD1L-AS1	GGUUCUGCAUAUGAGUUCA
AC096559.1	GACACUGAAUGAGCAGUGA
siEZH2	s4917
siSOX2	s13294
siFOXM1	S5249
siNC	4390846

## Sheet: Sequences of RT-qPCR primers
Gene Name	Forward	Reverse
PTTG1	AGCTGGGGTCTGGACCTTCAAT	AGGCTGGTGGGGCATCGAAC
NEK2	TGTCTCTGGCAAGTAATCCAGAACT	TCAGGTCCTTGCACTTGGACT
NUF2	CTGGGCCTGGCGGTGTTTTC	TGTTAATCTCCCAGGCTCTGGTT
CEP55	ATCGCGTCCGCGGGATTCAA	TCTCTGAAATGGTCGCCAAGTCC
SOX2	CTAGTCTCCAAGCGACGAAA	AAATTCAGCAAGAAGCCTCTC
BHLHE41	GCAGTTGAACATGGACGAAGG	AGGTATCCTTGGTGTCGTCTC
LOXL4	GGCTTTCAGAATCAGGTGCG	CCCAGTTTTCACTGCACACG
MUC1	AGTGCTTACAGTTGTTACGGGT	GCTGTTCACTGAACTTCTCT
SPDEF	CTGCTGGCCCCTGGTTC	GCTGTGTCTGTTAGCTGCCT
EZH2	GCTTCCTACATCGTAAGTGCAA	GCTCCCTCCAAATGCTGGTA
SCIRT	CTTGCCACTTCTTCTGGATG	TCCTAGCTACTTATCCTAGCCT
GAPDH	GGAAGGTCGGAGTCAACGGATTT	GCCATGGAATTTGCCATGGGTGG
b-ACTIN	GACGACATGGAGAAAATCTG	ATGATCGGGGTCATCTTCTC

## Sheet: Oligo and RNAse H sensitivity
Probe number	Probe Sequence	RNAse H sensitivity
1	AGTCAAGATCGCCGGGAA	5
2	TTCTCTCCATGTTCAGGG	2.2
3	AGCACCGGGTCAGACTTG	5
4	GCACTAGGCAGGGACTAG	1.9
5	CTTCCTAGTAGGGTGCAG	2.8
6	TGTGAGCTGAGTGGCAGA	3
7	AGCATGGCTACTCAGTGT	2.4
8	GCAGGAAGACAGAGTGTT	2.2
9	GACTTCAGCTGTCCTCAA	142.8
10	GCATCCAGAAGAAGTGGC	20.2
11	GGCCTTACTGATGGTCAG	137.5
12	AACGGAGTGGGCCTGCAT	1.3
13	AAGGAGGAGGCCCTTCAG	1.4
14	GATGATGCCACTGGCAGA	13.9
15	TGATGACTGGCGGCTGAG	93.4
16	GGAAGAGTAGCTGGTGGA	19.5
17	CCTGCTGGATGAGCTGAG	14.7
18	CTGTTTCCACGACTTGGA	1.1
19	AGCTCCCAAGGGGAACTC	4.7
20	TCCACTGGACCAATCACT	2.2
21	GGTTAAGAACTCCAGGGA	17.4
22	GAGCAGATTTTGAGGGCA	2.7

## Sheet: Oligo probes and primers
Probe No.	Probe Sequence	Primer name	Forward sequence	Reverse sequence
1	AGTCAAGATCGCCGGGAA	Scirt p1	TGTAATGAAACTGGACGCCT	TTCAACCTGTGGTCTAACCTC
2	TTCTCTCCATGTTCAGGG	Scirt p2	AGGAGGTGTAGAGGGCTAA	TCCATGTTCAGGGTCTGC
3	AGCACCGGGTCAGACTTG	Scirt p2	AGGAGGTGTAGAGGGCTAA	TCCATGTTCAGGGTCTGC
4	GCACTAGGCAGGGACTAG	Scirt p3	GCCACTTTCTCCACTCTGT	TAGCACTAGGCAGGGACT
5	CTTCCTAGTAGGGTGCAG	Scirt p4	GCAGACCCTGAACATGGA	GCTCAGGGAGATGGAGATG
6	TGTGAGCTGAGTGGCAGA	Scirt p5	GGACTTGCATGCTCTTCCTA	CTCAGTGTATGTGAGCTGAGT
7	AGCATGGCTACTCAGTGT	Scirt p5	GGACTTGCATGCTCTTCCTA	CTCAGTGTATGTGAGCTGAGT
8	GCAGGAAGACAGAGTGTT	Scirt p5	GGACTTGCATGCTCTTCCTA	CTCAGTGTATGTGAGCTGAGT
9	GACTTCAGCTGTCCTCAA	Scirt p6	CACCCTACTAGGAAGGCAC	AGCAGGAAGACAGAGTGTTT
10	GCATCCAGAAGAAGTGGC	Scirt p7	CTGAACCTCAGCTCACAT	GGTCAGAGCATCCAGAAGAA
11	GGCCTTACTGATGGTCAG	Scirt p7	CTGAACCTCAGCTCACAT	GGTCAGAGCATCCAGAAGAA
12	AACGGAGTGGGCCTGCAT	Scirt p8	CCACTTCTTCTGGATGCTCT	TCTGTAGTCCTAGCTACTTATCCT
13	AAGGAGGAGGCCCTTCAG	Scirt p8	CCACTTCTTCTGGATGCTCT	TCTGTAGTCCTAGCTACTTATCCT
14	GATGATGCCACTGGCAGA	Scirt p9	CGGAATTGGTGGGTTCTTG	ACAGGTTGAAGAGGTGCTT
15	TGATGACTGGCGGCTGAG	Scirt p10	TCCAGATTCATGAGGCAAGG	ATGTGACTGTGGGCATGTA
16	GGAAGAGTAGCTGGTGGA	Scirt p10	TCCAGATTCATGAGGCAAGG	ATGTGACTGTGGGCATGTA
17	CCTGCTGGATGAGCTGAG	Scirt p10	TCCAGATTCATGAGGCAAGG	ATGTGACTGTGGGCATGTA
18	CTGTTTCCACGACTTGGA	Scirt p11	CGGCAACAAATCCAATCACA	GATCCACTGGACCAATCACT
19	AGCTCCCAAGGGGAACTC	Scirt p12	CTCTTTCTCTGTCTTCCTTCCT	ATGGTTAAGAACTCCAGGGAAG
20	TCCACTGGACCAATCACT	Scirt p12	CTCTTTCTCTGTCTTCCTTCCT	ATGGTTAAGAACTCCAGGGAAG
21	GGTTAAGAACTCCAGGGA	Scirt p13	TCCTCTTCCCTGGAGTTCT	GCAAGCAGACACAGCATT
22	GAGCAGATTTTGAGGGCA	Scirt p13	TCCTCTTCCCTGGAGTTCT	GCAAGCAGACACAGCATT

## Sheet: Biotinylated probes for CHART 
NAME	ANTISENSE sequence 5' to 3'
SCIRT CO1	AGC CCT CTG CTG ACA GGT TAA GTC A
SCIRT CO2	TAT GTG AGC TGA GTG GCA GAG TGC C
SCIRT CO3	TGA GAG CAG ATT TTG AGG GCA ACG C
SCIRT CO4	CAA CAG GTT GAA GAG GTG CTT GGG G
NAME	SENSE sequence 5' to 3'
SCIRT sense CO1	T GAC TTA ACC TGT CAG CAG AGG GCT
SCIRT sense CO2	G GCA CTC TGC CAC TCA GCT CAC ATA
SCIRT sense CO3	G CGT TGC CCT CAA AAT CTG CTC TCA
SCIRT sense CO4	C CCC AAG CAC CTC TTC AAC CTG TTG

## Sheet: List of Antibodies 
Target	Name	Cat. Number	Species	Application	Amount	Company
FOXM1	NBP1	30961	Rabbit	CHIP	5µg	NOVUS BIO
FOXM1	D3F2B	20459S	Rabbit	WB	0.736111	Cell Signalling
FOXM1		GTX102170	Rabbit	RIP	5µg	GENE TEX
SOX2	D6D9 XP	5024S	Rabbit	CHIP	5µg	Cell Signalling
SOX2		AB92494	Rabbit	WB	0.736111	ABCAM
EZH2	AC22	39875	Mouse	CHIP/ RIP/co-IP	3µg	Active Motif
EZH2	D2C9 XP	5246P	Rabbit	WB	0.736111	Cell Signalling
H3K27ac		AB4729	Rabbit	CHIP	2µg	ABCAM
Pol II		AB817	Mouse	CHIP	5µg	ABCAM
β-Actin		AB6276	Mouse	WB	0.736111	ABCAM
SUZ12	D39F6 XP	3737S	Rabbit	CHIP	5µg	Cell Signalling
Normal Mouse IgG		CS200621	MOUSE	RIP	3-5µg	Millipore
Normal Rabbit IgG		PP46B	RABBIT	RIP	5µg	Millipore

## Sheet: Primers used for RIP
Gene Name	Forward	Reverse
snRNA U1	GGGAGATACCATGATCACGAAGGT	CCACAAATTATGCAGTCGAGTTTCCC
MALAT1	GCTGACCCAGGTGCTACACAGA	CTGCTGCTTGCTCGCTTGCT
SCIRT	CTTGCCACTTCTTCTGGATG	TCCTAGCTACTTATCCTAGCCT
